# Supplementary material for: Respiratory tissue-associated commensal bacteria offer therapeutic potential against pneumococcal colonization
Source: eLife. 2020 Dec 8;9:e53581. doi: 10.7554/eLife.53581 (PMC7723408; doi:10.7554/eLife.53581)
Supplement: Supplementary file 1. — L. murimus genome annotation obtained by RAST showing contig identifiers and detected features, start, stop coordinates and coding strand are indicated considering corresponding contig. Enzymatic commission number (EC), nucleotide and deduced amino acid sequences are also presented. [file elife-53581-supp1.xlsx]

## Sheet: Sheet1
contig_id	feature_id	start	stop	strand	function	EC number	nucleotide_sequence	aa_sequence	function
NODE_100_length_5663_cov_87.131972	fig|1578.617.peg.1	1478	180	-	Pyrimidine-nucleoside phosphorylase (EC 2.4.2.2)	2.4.2.2	atgcgaatggtagatattatcgaacgcaaacgcaatggagcagaattgacaaaagaagagctacacacttttattgagggttatactaaaggcgagatcccagattatcaagctagtgcttttttgatggcgacctatttcaatggaatgacggctaaggagcaagcgacctttgctttagagatgctccattcaggtgatgaagttgacttgtcactgattccagggatcaaggtcgataaacactcaactggtggtgtgggggataagactagcatccccttagctccgatgatcgctgcgttagatattccgatcccaatgatctcaggtcgggggttgggacatactggaggaacgttggataaattggaagcgataccagggtttaaggtcgaa…	MRMVDIIERKRNGAELTKEELHTFIEGYTKGEIPDYQASAFLMATYFNGMTAKEQATFALEMLHSGDEVDLSLIPGIKVDKHSTGGVGDKTSIPLAPMIAALDIPIPMISGRGLGHTGGTLDKLEAIPGFKVELSETEFIQQVKDINLAIISATGNIAPADKKLYALRDVTATVDSIPLIAGSIMSKKIASGTDALVLDVKTGSGAFMKTQEKAKALAKAMVKIGKNVGMRCMAVISDMNQPLGNTIGNTLEIEESIEILKGNGPKDITDLVLTLGSQMVVLAGKAETLEQAREMLIEVLVNGKALEKFGAMIEAQGGDRNIIDDHSLMPQAKYQISIKEPKAGYISKMTADELGVASMLLGGGRQSKEDTINYAVGLRLHKKVGERVEKDEELVTVYS…	Pyrimidine-nucleoside phosphorylase
NODE_100_length_5663_cov_87.131972	fig|1578.617.peg.2	2211	1495	-	Purine nucleoside phosphorylase (EC 2.4.2.1)	2.4.2.1	atgagtgaacatattgaagccaagaaaggtgagattgctaagatcgttttattaccaggtgatcctttacgggccaaacatattgcggaaacgtttttagacgatccacgctgttacaatacagttcgcaatgcattgggttatacaggaacttataaggggataaagatctcggtccaaggcacagggatggggatcccatcaactttgatatatgcagaagagctgatcaattattacgggtgtgagatcttgatccgtgtcggtacatgtggcggaatggcgccggaaataaaagttagagatgttgttttagcgcaatcggcaacaactgattcggccatcattcaaaatacttttggtagtggtctttattatgcgcccacagctgattttagt…	MSEHIEAKKGEIAKIVLLPGDPLRAKHIAETFLDDPRCYNTVRNALGYTGTYKGIKISVQGTGMGIPSTLIYAEELINYYGCEILIRVGTCGGMAPEIKVRDVVLAQSATTDSAIIQNTFGSGLYYAPTADFSLLDHAYTAAKKERIAVKVGNIISEDRFYNEEIDRKKLIQYNVLGAEMEAAGLYLIAAKYNVRALAVLTISNHIISGESTPASERERSFNDMVKVALEAAVLQVKA	Purine nucleoside phosphorylase
NODE_100_length_5663_cov_87.131972	fig|1578.617.peg.3	3406	2204	-	Phosphopentomutase (EC 5.4.2.7)	5.4.2.7	atgcgatttaaacgtgtatttacattagtgctcgactcggtagggatcggagctgctaaagatgcggctaaatttgatgatgaaggctctgatactctaggccacatcacttcttattggaatggtgagttaaaattacctaacttaacggctctaggtttgggcaatattcgggctgattcgccattaacaggcgttttaccagttgaagccccactagcttactatggcaagatgcaagagatctcggctggaaaagatagtatggatggtcactgggaaatgatgggcttgccagttactgaaccgctgggctttttccctaatggattcccagaacctttgatcaaagcgatcgaagaatttagtggccgtaaagtgatcgtcaatcgtccgatc…	MRFKRVFTLVLDSVGIGAAKDAAKFDDEGSDTLGHITSYWNGELKLPNLTALGLGNIRADSPLTGVLPVEAPLAYYGKMQEISAGKDSMDGHWEMMGLPVTEPLGFFPNGFPEPLIKAIEEFSGRKVIVNRPISGTEVIVKYGEEQLETGALIVYTSGDSVLQIAANTAIISLDELYRICKYVREITIDEYHIGRIIARPYVGKDKSEFKRTSDRHDFTLVPPKDTVLDMLGQAGFEVIGVGKTNDIFSGKGIATRIHTESNDDGMTKTIEVAQTDFTGLCFTNLVDFDAMYGHRRDLEGYGKALAAFDERLGELLQNLQVNDLLLITADHGNDPGFKGTDHTREYVPLLAYSPSLSKGSSLGIRETYADLGATILDNFELPNKTDGKSFLADLRRDQDE	Phosphopentomutase
NODE_100_length_5663_cov_87.131972	fig|1578.617.peg.4	4066	3419	-	Deoxyribose-phosphate aldolase (EC 4.1.2.4)	4.1.2.4	atggatctagcaaaatatatcgatcacacgatcttggcaccaaatgcaactgaagaacaagtagaaaagataatttctgaggcattagaatatggctttgcatcagtctgtatcaatccatattgggtcaaaaaagtggctcaaggtttagctgatagtgatgtcaaagtctgtacggtgatcggctttcctttaggcgctaataagaccagcatcaaagtcagtgaagctaaagaagcgatcgctgatggagcagatgaacttgatatggtgataaatatcggcgaattaaaggccaaacattacgacgcggtcaaagcagatatcaaggcggtagttgatgtatgtcatgcagaaagtaaattggtcaaagttatcattgaagcttgcttattgacc…	MDLAKYIDHTILAPNATEEQVEKIISEALEYGFASVCINPYWVKKVAQGLADSDVKVCTVIGFPLGANKTSIKVSEAKEAIADGADELDMVINIGELKAKHYDAVKADIKAVVDVCHAESKLVKVIIEACLLTDEEKIKACELSKEAGADYVKTSTGFSTGGATVADIELMRKTVGPDIGVKASGGIHSKEEALALIEAGASRLGASAGVKIVNS	Deoxyribose-phosphate aldolase
NODE_100_length_5663_cov_87.131972	fig|1578.617.peg.5	4274	4426	+	hypothetical protein		gtgatttacgagtcaaacatcatctatttaattttacggcgtacacatgtcgcttatctgcctagcataggtcatgcggaccttttgataacaacagatatttatgcgtacttgatcgacgaatacaaagaaaaagttgtagcttatttttaa	MIYESNIIYLILRRTHVAYLPSIGHADLLITTDIYAYLIDEYKEKVVAYF	hypothetical protein
NODE_100_length_5663_cov_87.131972	fig|1578.617.peg.6	4809	5366	+	hypothetical protein		ttgtcaatcctctttgggataattttctttaacggtttatctattgttaaagctgatgtccagcctgatattcaatctgatagttacttcaatttgtatgataatctaactcctgaaaaccaacaattaatgatgactttagaccaatatattgcagtagatgataacggatctgttaaatttgatctgcaaaaagctaaacaagatcaacaatcaatagatgttttaaatgttggtaacgcaataaacgatttatctctcaatatcgaagcagaaggttatacttcgactgttaatggtgtctttcgagcattatttccaataggttcttacggtaattattgcggtaaaggaaataaagggtggaataagaagcctattgatgatttagatgctaca…	MSILFGIIFFNGLSIVKADVQPDIQSDSYFNLYDNLTPENQQLMMTLDQYIAVDDNGSVKFDLQKAKQDQQSIDVLNVGNAINDLSLNIEAEGYTSTVNGVFRALFPIGSYGNYCGKGNKGWNKKPIDDLDATCRAHDACFKGFNAKSKSCNRAFISKLRPIANRTPITTYKGVYARVAIKLFSV	hypothetical protein
NODE_101_length_5576_cov_72.270612	fig|1578.617.peg.7	204	19	-	hypothetical protein		atggaattgtttacagtagaaaagttaacaaagaaatttggaaaaaaagttgtattggataatataactatcaattttaaagaagatactacagtaatcgttgggcttaatggatctggaaaaacagtatttttaaattccattactggtatactaaatattgattctggaaagtcaagtccataa	MELFTVEKLTKKFGKKVVLDNITINFKEDTTVIVGLNGSGKTVFLNSITGILNIDSGKSSP	hypothetical protein
NODE_101_length_5576_cov_72.270612	fig|1578.617.peg.8	1071	1793	+	hypothetical protein		atggctgatatagctagggaattaggtaggcatagaagtaccatttctagagagataagaagatctcaagattttgaagattataaagagctgatgcctaaaaagcgaatgaaaatctttagatatgacgctaaaagcgctgaatttaaggctaggttaagatgggagaccgtgggacgaaaatcactttatagcagctatacgggtagaaaaatcaataagtatctgcgtaaaaagtattctccagaacaaatagcatacggcacaaaggatgtgactgtatctaaaaatacgatatacaactggatctatcgaggaaagcttgaaattagcagatctgacttacgaagaagacgcaataaaaaaggaaaaagagtacgagaatcagaggctgaaatg…	MADIARELGRHRSTISREIRRSQDFEDYKELMPKKRMKIFRYDAKSAEFKARLRWETVGRKSLYSSYTGRKINKYLRKKYSPEQIAYGTKDVTVSKNTIYNWIYRGKLEISRSDLRRRRNKKGKRVRESEAEMNRELIKGRSIEFRPKQANTRSEFGHWELELELDTILPKRDSKDVIATFSERKTRFLFAVKIKSKSGTFLIPAIDTFMSLYGEYARSITCDHGTEFTNTTLVNQIGIF	hypothetical protein
NODE_101_length_5576_cov_72.270612	fig|1578.617.peg.9	2964	2002	-	Muramoyltetrapeptide carboxypeptidase (EC 3.4.17.13)	3.4.17.13	atgttgatacccgcacgattgaaacaaaatgatgagatcaggatcattgcacctagtcgtactcttgattgtgtcggtggttttgccgctaatcaaacagcacaagaaaaattaacacagctgggctttaaggtcacttttggtaaccatgtatcagggatgactttagatggcactaacagcatttctgagcggatagatgatattcatgctgcatttagcgatcctaatgtcaaagcgatccaaacagtgatcggtggttttacatcaaatgagttattaccatacctagattttgatctgatagccaataatcccaagatcatctgtggtttttcagatttcacagcgcttgctaatgcgatcacagctaaaacagggctagttacctattatgga…	MLIPARLKQNDEIRIIAPSRTLDCVGGFAANQTAQEKLTQLGFKVTFGNHVSGMTLDGTNSISERIDDIHAAFSDPNVKAIQTVIGGFTSNELLPYLDFDLIANNPKIICGFSDFTALANAITAKTGLVTYYGPAYITLKMLDKAGAYQDNAFMQALTQKHYELRPSQTWSSDEWFLSDSKRTFYPTAWKVYTSGRVHGQTVGGNVNTLFLLAGTPYQPNFEDKIILLEFSDDGETWLDFSRLLAQVLQLAKRPRALLLGRFPKTSQMTEQRLLYILDKFPILKEIPVMYDLDFGHTQPIFTIPLGQEVWLDTDELVIKV	Muramoyltetrapeptide carboxypeptidase
NODE_101_length_5576_cov_72.270612	fig|1578.617.peg.10	3652	3068	-	Signal peptidase I (EC 3.4.21.89)	3.4.21.89	atgtcaacatttaaaaatattatgggttggatctggcccgttgttgtcggacttcttattgcgcttttgatcaacactttcctgttatcgttagtcaaagtcgatgggttgtcaatgtatcccaatctccaaaataacgaacgcgtgatcatgttaaaacatgctaagataaaacgtgataccgtcgttgttttcaatgctaagggcgttgacgatcgtgctggcataagcgatagtaccaaatacgtcaagcgcgttatcggtttgcctggtgataagatcgaatacaaaaatgatggtaaactctatgttaacggaaaattccaatctcaaggatatatcactactgagcaacaaaaagaaggaactttatcgatctcaaatgccgaagataagggt…	MSTFKNIMGWIWPVVVGLLIALLINTFLLSLVKVDGLSMYPNLQNNERVIMLKHAKIKRDTVVVFNAKGVDDRAGISDSTKYVKRVIGLPGDKIEYKNDGKLYVNGKFQSQGYITTEQQKEGTLSISNAEDKGVTLGTGRSFTVPKDEYFVLGDNREVSNDSRSYGFVPRSKILGVVKVPFWNNAHEYINSYGD	Signal peptidase I
NODE_101_length_5576_cov_72.270612	fig|1578.617.peg.11	4472	3639	-	hypothetical protein		atgaaaaaaatcgatctaggcttgaaagctagttctgaccctgaacagatcaaggatcgactacaatatcagcccaatgtttttgaattctataccgctgaaaatgactttactggggatggactgaaacgtttggcctatggtatcgatcaagtcaaagatgcggggataaaccatatcgtattacatcatcccatgcgttaccgtgagtattttaccgaacttttgacacctgaagctaaattaccagagctgtatcgatttattgagcaaagttccttagatttgttacaattagcttatgacaaaaatgttcaagtattgatccatggatcttattcgcgccaaacggctgaatttctcagtttatatcctgatttagaatatgctgaagaatac…	MKKIDLGLKASSDPEQIKDRLQYQPNVFEFYTAENDFTGDGLKRLAYGIDQVKDAGINHIVLHHPMRYREYFTELLTPEAKLPELYRFIEQSSLDLLQLAYDKNVQVLIHGSYSRQTAEFLSLYPDLEYAEEYVFKRLDHFKDLGKEHVMFENSISPVFYYGDETLDAKILAHDYRLAFDTSHCFIKWQGDNAKLMTALAHLKQNIVHYHLVDSLGKTHDSLELGKGKIVWKNVLPLLNEDATNIFEVVLKDQTDALEQVNSFNYLKTLEEKLDVNI	hypothetical protein
NODE_101_length_5576_cov_72.270612	fig|1578.617.peg.12	5398	4535	-	DegV family protein		atgaaaatagctgttgttaccgacagtacagcctatctaagcgcggaacagatcaaagaaaatgatatccatatcgttcctatcccgtttattctcgatggtaaaagctatgatgaaggtattgatattactactgaagaattttatgaaaagttacggacttcggaaactttccctagtacctcacaaccaccgatcggcaaattgatcgaactttatgagtccttaggtgaccaaggctatgatgctgtgatcagtatccacttagccagtacgatctctgggttagttcaaactttggaaacagtcaaagatacggtcgataatatccaagttgtacctgtagattcggagatcacagttctgttgatgggttacttagcgatcgaagcggctcga…	MKIAVVTDSTAYLSAEQIKENDIHIVPIPFILDGKSYDEGIDITTEEFYEKLRTSETFPSTSQPPIGKLIELYESLGDQGYDAVISIHLASTISGLVQTLETVKDTVDNIQVVPVDSEITVLLMGYLAIEAARMAKQGKNLDEILARLDHLKKTINEYFVVDDLQNLVRGGRLSNAAAFVGSVLKIKPILTFDDETDKIVAFDKVRSSKRALKRVEDLFEEDTKDLTYPIKMIVIHANNEAAAKEWQAKLAKKYPNNSIEISYFGPVIGTHLGENALALGWMEDIDK	DegV family protein
NODE_102_length_5422_cov_83.607905	fig|1578.617.peg.13	1197	100	-	Integrase		atggcaagtatcgtcaaacgcggtaagaactatcatgttcgagtttcttggcgtgataaaagtggcgtactaaagcaaaaatctaaaggtggattcaaaacaaaaaacgaagcccgtcagtacgcagttgaattagagcaacaattatttacaggcgttaatatcaagcaaaagaaaattcccttttctgagtattttgcaaattggtatgaagtatataagcaacccacttcaaagcactcaactcaacagcgatacgaagttgcaataagacagatcaacgagtactttcaagacattgcgatccaagatatcactcgtcatgattatcaggtatttctaaatcaatacggtacgaaccgctcaaaaaataccgttcggatcatgcactcaatgatc…	MASIVKRGKNYHVRVSWRDKSGVLKQKSKGGFKTKNEARQYAVELEQQLFTGVNIKQKKIPFSEYFANWYEVYKQPTSKHSTQQRYEVAIRQINEYFQDIAIQDITRHDYQVFLNQYGTNRSKNTVRIMHSMIKACVSSAMYDEIIRKNFTENIQLVFDPARTRKIDYLSLDELKRLTDLCLNGRQKRYTSRYMILTAIMTGMRIGEIMALTWDDIDYQRQTITVNKTWDYQSGGGFKATKNDSSNRTVNVTQQLLDWLAELKENNSNMVFENARGQIPTSAAANNTLRTLLKQAEIKKPSFHFHSLRHTHVAYLLSKGIDIFVISKRLGHSNLSTTTDTYAYLIHEYQQTQISEIKKNLALLAE	Integrase
NODE_102_length_5422_cov_83.607905	fig|1578.617.peg.14	1950	1270	-	hypothetical protein		atgaataagggtatcaaaatcactgctttagtacttttatctgctttaactttagctggttgtagcaattctgtagataattcagataaatcagcttcttcatccagtgttaaagttaagaaaaatagttcttcccgtgataacaaaaaagtaacctctggagaacttttgaaggttggtcaatggcataatgatccagctgctggaaaagtaactctagaacggatagtctcacctactaatgctgaaatcaattacggctcaatgaacttcaaaattaaatctatcaaactattaaaatatgagccaaaaacatcagaacaaaaggaaaatatcgctacagcatttaacaccttagatgtttcttcatcagcttacgttgttcaagtgatctataca…	MNKGIKITALVLLSALTLAGCSNSVDNSDKSASSSSVKVKKNSSSRDNKKVTSGELLKVGQWHNDPAAGKVTLERIVSPTNAEINYGSMNFKIKSIKLLKYEPKTSEQKENIATAFNTLDVSSSAYVVQVIYTLDNTSDSELQFNGIKSLVTNYGQQLSMNSGLIDDGVGSAIAAHAHKDEHAQALIKSDDVSKLNQLTFNLDSISRTDTYETVAEAPESLTIDFK	hypothetical protein
NODE_102_length_5422_cov_83.607905	fig|1578.617.peg.15	2439	2011	-	hypothetical protein		atgtggaaatatagcgatcttttacggaatatctataaaaaaacggggacacatgatccatttaaaatagctatgtattttgatattccgacatattatgtacagatagatagtcccttagcaaagactatttatctctatggtcagcctataattttactatccgataaattgcaagaaagtagcgctaaatactatgtttgtggacatgagttaggtcatatctttaaacatactggtatcgtttgcgcatatgatagtaacacacattttagatctaacatggaacgtgaagctgaccaatttagttttgatctctgtaatgctttatatcacgaagaaaacggatattaccctaatgagatcaatcaacttaactactcatatggagtacctaaa…	MWKYSDLLRNIYKKTGTHDPFKIAMYFDIPTYYVQIDSPLAKTIYLYGQPIILLSDKLQESSAKYYVCGHELGHIFKHTGIVCAYDSNTHFRSNMEREADQFSFDLCNALYHEENGYYPNEINQLNYSYGVPKNFHLSETLR	hypothetical protein
NODE_102_length_5422_cov_83.607905	fig|1578.617.peg.16	2850	2452	-	hypothetical protein		atgttaggtaataatataaaagaactaagaaaagctaaacgcatgacccaaaaagagttggcagacacattacatgtatctcagcaaactgtaggatcatgggaaaccgaacgagctatacctggtgctgatacattagctcaattagccgattacttcggcgtgacgactgactatctactaggtagatctgaaaagaaatcatctagtgaagaacaagaaacaaaagacttgaaaaaatttcttgaagataatttggacaatgggatgactttcggtgatggaaaagtcacacaagaagatagagagaaacttgagatagcattaactcaaattttttataggtatcacgacgaatttaaaaaaaggaaagaagaaaaaggtagatttaagttttaa	MLGNNIKELRKAKRMTQKELADTLHVSQQTVGSWETERAIPGADTLAQLADYFGVTTDYLLGRSEKKSSSEEQETKDLKKFLEDNLDNGMTFGDGKVTQEDREKLEIALTQIFYRYHDEFKKRKEEKGRFKF	hypothetical protein
NODE_102_length_5422_cov_83.607905	fig|1578.617.peg.17	3265	3408	+	hypothetical protein		atggataatctaacagtagaaattgtggcttttattttggttattgcagttattttaactgttatcggttgggtgatggagctcaaaatttatcaacttaaaaaaaagctaaaacaggtgaaagataaagggaaaaagaaatag	MDNLTVEIVAFILVIAVILTVIGWVMELKIYQLKKKLKQVKDKGKKK	hypothetical protein
NODE_102_length_5422_cov_83.607905	fig|1578.617.peg.18	3685	3822	+	hypothetical protein		atgaagttatttgaatatcaaaaaggtaaatttaagatgtcgatgtcagttagaagaaccaccaaaaaagaaatgatcgcaagtggaatcgcattgatcgttatcgcatgtttggttacttggtgggtgatgaagtaa	MKLFEYQKGKFKMSMSVRRTTKKEMIASGIALIVIACLVTWWVMK	hypothetical protein
NODE_102_length_5422_cov_83.607905	fig|1578.617.peg.19	3822	3989	+	hypothetical protein		atggcactgtcacaaacagaacgcaacaaacgctggcaagctaagaacaaagaaaaagctgcctatatgcgtaagcgatcggtagcaaggacatttatcacgaaatatggtaagtatgaagatctattagaactcaaagaactgcttgataagagactatcagaataa	MALSQTERNKRWQAKNKEKAAYMRKRSVARTFITKYGKYEDLLELKELLDKRLSE	hypothetical protein
NODE_102_length_5422_cov_83.607905	fig|1578.617.peg.20	4236	4589	+	hypothetical protein		atgatcaacaatggagaaatacctatctcaggagctggaaattctactaagggtagaggattatatttttcagaagctaagggtcaagctttattccatgccaaaaagggaactacgcctcttgttggaaaatggtcactagatgtaagtggtcgagtcttaaattttaaagacgctgcgccactaaggtctataggagacattgaaattggtgttccttacaagtatatggaatatgaatccaatgttgatataattgccatcttaagtggatatgatattataaaaaaagatgcaactatcaatgttttgaatcgaggtaaattatattggctaggatttacagattattaa	MINNGEIPISGAGNSTKGRGLYFSEAKGQALFHAKKGTTPLVGKWSLDVSGRVLNFKDAAPLRSIGDIEIGVPYKYMEYESNVDIIAILSGYDIIKKDATINVLNRGKLYWLGFTDY	hypothetical protein
NODE_102_length_5422_cov_83.607905	fig|1578.617.peg.21	4781	4936	+	hypothetical protein		atgaaagatatgctttttaaggaagcagaagttattgagctaccacaggggcaaaaagcacctgaatacaaggatccgtatagaaaaacggaatatgtttcttatacttttgaagatatggggatgaaagaacctcgcgacctaggcaagtcataa	MKDMLFKEAEVIELPQGQKAPEYKDPYRKTEYVSYTFEDMGMKEPRDLGKS	hypothetical protein
NODE_102_length_5422_cov_83.607905	fig|1578.617.peg.22	5190	5399	+	hypothetical protein		atgagtgagcttattccacaagaatgtgatgtagttattttaaaaacaggtgaacgggtaggtttaatggatcaattagacgaaactcatttccttcctgattatggcgttgaaacacctgaacaagaagaaaaaacgatggcgatgatgccaatttcaattgatgatattgaaaaagttgtatatagaccgaaaggcactctgaagtga	MSELIPQECDVVILKTGERVGLMDQLDETHFLPDYGVETPEQEEKTMAMMPISIDDIEKVVYRPKGTLK	hypothetical protein
NODE_103_length_5325_cov_108.773810	fig|1578.617.peg.23	629	246	-	LSU ribosomal protein L17p		atggcttaccgtaaattaggtcgcacaagcgcacaccgtaaatcaatgttacgcaacttgacaactgacttgatcgttaacggtcgtatcgttacaacagaaacacgtgctaaagaagtacgtaagactgctgaaaagatgatcactttgggtaaaaaaggtgatttagcttctcgtcgtcgtgctgctgcattcatgatggatgttgttgcagacgtcaaagaagatggcgataaggcagttgttcaaacagcattacaaaagttgtttgaagaagttgcacctcgttttgaaggccgtaacggcggttacacacgtatcatcaagatgaacgaacgccgcggcgatgcagctaagatggctgttcttgaattggtcgactaa	MAYRKLGRTSAHRKSMLRNLTTDLIVNGRIVTTETRAKEVRKTAEKMITLGKKGDLASRRRAAAFMMDVVADVKEDGDKAVVQTALQKLFEEVAPRFEGRNGGYTRIIKMNERRGDAAKMAVLELVD	LSU ribosomal protein L17p
NODE_103_length_5325_cov_108.773810	fig|1578.617.peg.24	1601	657	-	DNA-directed RNA polymerase alpha subunit (EC 2.7.7.6)	2.7.7.6	atgatcgaatttgaaaaaccaaaaattcataaaatcgaagaaggtcaagattacggtaagttcgtcgttgaaccgcttgaacgtggttatggtacaactttaggtaactctttacgtcgtatcttactttcttccttaccaggtgcagcgatcactgatgttcaaatcgatggtgtgttacatgaattttccactgtaaaaggtgttttagaagatgtgacagcgatcatcttgaacttaaagaaagtcgcacttaaacttgattctgaagattctcaaactttagaatttgatgttgttgggccaaaagaagttactgccggtgacattcaaggtagcagtgatgtagaaatcctcaacccagatcaatatatttgtactgtggctgatggcgctgtg…	MIEFEKPKIHKIEEGQDYGKFVVEPLERGYGTTLGNSLRRILLSSLPGAAITDVQIDGVLHEFSTVKGVLEDVTAIILNLKKVALKLDSEDSQTLEFDVVGPKEVTAGDIQGSSDVEILNPDQYICTVADGAVFHARMTANKGRGYVSATENKAKAEDMPIGVLPIDSIYTPIERVNYQVEKTRVGQKNDYDKLTLDVWTNGSITPSEAISLSAKILTEHLTLFVDLTDEAKNAEIMVEKEETHKEKMLEMTIEELDLSVRSYNCLKRAGINTVQALTNKSEADMMKVRNLGRKSLEEVKAKLADLGLSLRHDD	DNA-directed RNA polymerase alpha subunit
NODE_103_length_5325_cov_108.773810	fig|1578.617.peg.25	2073	1687	-	SSU ribosomal protein S11p (S14e)		atggcagttaaaaagtctcgtaagcgccgtgtaaagaagaatatcgaaagcggtgttgcacatattcattcaacattcaataacacacttgttatgatcacagacgttcatggtaacgccgtagcatggtcatcagcaggttctttaggcttcaagggttcccgtaagtctactccatttgctgcccaaatggccgctgaagcagcagctaagggtgcaatggatcatggcatgaagactgttgaagttgcagttaaaggtcctggttctggtcgtgaagctgctattcgtgcgcttcaaacaacaggtcttgaagtcacatctatcaaggatgttacaccagttcctcataacggatgccgtcctccaaaacgccgtcgtgtttaa	MAVKKSRKRRVKKNIESGVAHIHSTFNNTLVMITDVHGNAVAWSSAGSLGFKGSRKSTPFAAQMAAEAAAKGAMDHGMKTVEVAVKGPGSGREAAIRALQTTGLEVTSIKDVTPVPHNGCRPPKRRRV	SSU ribosomal protein S11p (14e)
NODE_103_length_5325_cov_108.773810	fig|1578.617.peg.26	2472	2107	-	SSU ribosomal protein S13p (S18e)		atggctcgtattgcaggtgtcgatttaccacgcgacaagcgtatcgttatcggcttaacttatatttacggaatcggtaatacaacagctaagaagatcttagctgaagcaggtgtttcagaagacgttcgcgttcgtgatttaacagcagatcaagaagacaagatccgtgctgttgttgataactacaaggtagaaggtgaccttcgccgtgaagtttctttaaacatcaaacgtctttccgaaatcggctcttaccgtggtctacgtcatcgtcgtcatttaccagttcgtggtcaaaacacgaagaacaatgcgcgtacacgtaaaggcccagcagtttcaattgcaggtaagaagaaataa	MARIAGVDLPRDKRIVIGLTYIYGIGNTTAKKILAEAGVSEDVRVRDLTADQEDKIRAVVDNYKVEGDLRREVSLNIKRLSEIGSYRGLRHRRHLPVRGQNTKNNARTRKGPAVSIAGKKK	SSU ribosomal protein S13p (18e)
NODE_103_length_5325_cov_108.773810	fig|1578.617.peg.27	2611	2498	-	LSU ribosomal protein L36p @ LSU ribosomal protein L36p, zinc-dependent		atgaaagtaagaccatcagttaaaccaatgtgcgaacattgcaaagttatcaaacgcaaaggtcgcgttatggttatttgcgataatccaaagcacaaacaacgtcaaggataa	MKVRPSVKPMCEHCKVIKRKGRVMVICDNPKHKQRQG	LSU ribosomal protein L36p @ LSU ribosomal protein L36p, zinc-dependent
NODE_103_length_5325_cov_108.773810	fig|1578.617.peg.28	2864	2646	-	Translation initiation factor 1		gtggcgaaagatgatgtgattgaaattgagggtacgatcaaagaaacgttgccaaatgcgatgttcaaagttgaacttgaaaatggacatgagattttagctcacgtttccggtaagatccgcatgcattatattcgtattttaccaggagacaaggttactgttgaaatgtccccttatgatttgactaagggtcgcattacctatcgctttaaatag	MAKDDVIEIEGTIKETLPNAMFKVELENGHEILAHVSGKIRMHYIRILPGDKVTVEMSPYDLTKGRITYRFK	Translation initiation factor 1
NODE_103_length_5325_cov_108.773810	fig|1578.617.peg.29	3740	3081	-	Adenylate kinase (EC 2.7.4.3)	2.7.4.3	atggcattaaatcttatgttgatgggtctgccaggtgcgggtaagggtacccaagctgaaaagatcgtggaccaatatcacattccacacatttccacgggggatatcttccgtgcagcaatgaagaacaatactccaatggggatcgaggctaaaagttacatagataagggtgaacttgtccctgatgaagtaacgaacggtatcgttaaagaacgtttagccaaagatgatgttaatgatggctacatgcttgatggtttcccacgtaacatggcacaagctgaagctttagaaacattcggggctcaattaggtaaaccattgaactgtgtgatcaacattcatgttgacccagaatctttgatggaacgtttgacaggccgttatatctgccgt…	MALNLMLMGLPGAGKGTQAEKIVDQYHIPHISTGDIFRAAMKNNTPMGIEAKSYIDKGELVPDEVTNGIVKERLAKDDVNDGYMLDGFPRNMAQAEALETFGAQLGKPLNCVINIHVDPESLMERLTGRYICRNCGATYHKIFNPTKVEGTCDRCGEHEFYQREDDKPETVKNRLDVNIKMNTPLLDFYKKQGILHEVDGNQDIDKVFADIKAVLDQIN	Adenylate kinase
NODE_103_length_5325_cov_108.773810	fig|1578.617.peg.30	5210	3870	-	hypothetical protein		atgttaaaagttgtcattataggtgctaatcatgcaggtttagctacggcacgttacttacttgagagtggtcgaccacttgagataacgatgatcgataaaaatagctcattaggttatatcgctggtgctactccactattgatcggcaataagatatcatcatatagaaactttttttcagccgatactgaatggatagctaagcatgtgacaaatttttatactgattctgaggttacaaaggttgattttggacgtaaacggatctttgctgagaaaagtaatggaaaaaaatttaactttaaatatgataaacttgttttggcaactggatctaggcaacaaaatttaattgttgaaaacaatgaactaagtgggatctacaaactaaaggat…	MLKVVIIGANHAGLATARYLLESGRPLEITMIDKNSSLGYIAGATPLLIGNKISSYRNFFSADTEWIAKHVTNFYTDSEVTKVDFGRKRIFAEKSNGKKFNFKYDKLVLATGSRQQNLIVENNELSGIYKLKDLKEALLINQKLSTRKCRDVAVIGGGYIGVEMAVALQARNKNVSLFEVNDYVLNTHYDKEFAQLAQQKLSENGVQVQVDEEILKFEGYNGKLTGIVTTQGNYSVDMVILAVGFLPNTQLGRKHLTCFTNGAYIVNSEQQTSDPDVYAVGDCATSYSKIFKDQMIDFSVADALHGSYVAAKSIVGEKTISDGTVMTNAVRVYGLNFFATGLTTEMAYKCGIEVEYVDYEDWVLLPAMLNNNKAKVRLIYTKEDRYLVGAQICSEADLS…	hypothetical protein
NODE_104_length_5252_cov_110.482660	fig|1578.617.peg.31	910	224	-	Phosphoglycerate mutase (EC 5.4.2.11)	5.4.2.11	atggcaaaattagtatttatccgtcacggacaaagtgaatggaacttagagaaccttttcacaggttgggtagacgtcaacttgagtgaacaaggcgaacgtgaagctaaggaagctggccacaagttaaaagaagctggtatcgaatttgaccaagcttacacatctgttttaacacgtgccatcaagactttgcacttcgcacttgaagaatcaggccaattatggatccctgaaaccaaatcatggcgcttaaacgaacgtcactacggtgcattacaaggcaagaacaaagctgatgcagctgaaaaatacggtgacgaacaagttcacatctggcgtcgttcttacgatgtattgcctccattattggatgcaaacgatgaaggttctgcagca…	MAKLVFIRHGQSEWNLENLFTGWVDVNLSEQGEREAKEAGHKLKEAGIEFDQAYTSVLTRAIKTLHFALEESGQLWIPETKSWRLNERHYGALQGKNKADAAEKYGDEQVHIWRRSYDVLPPLLDANDEGSAANDRRYAELDPRIIPGGENLKVTLERVIPFWEDNIAPDLLDGKNVIVAAHGNSLRALTKYIENISDEDIMDVEMATGQPVVYELDDNLNIVSKEKL	Phosphoglycerate mutase
NODE_104_length_5252_cov_110.482660	fig|1578.617.peg.32	2183	993	-	Aspartate aminotransferase (EC 2.6.1.1)	2.6.1.1	atgaataagcaggaatttttggcagaatatgctgttgcccgtaaaaatactgattcggtcaagtgggataatttaaaagaaactttcgatgcagaagatctattaccactttgggtcgctgatactgaattcaaagcaccaaaagaagcgcttgaagctatgacaaaacggatcgcgcatggtgcttttggctattccttaacaccagatgcgtattttgaagcttatttcaaatggcaaaaggaacgttatgggatcgaattgcatcgcgaatggatgcgttttggcacgggggtcgtgcaatctttgagcacgctagtcaacttattgacacaaaaagatgatgctgttttggtcttacaaccggtgtattatccatttatgaaagtcatcgaaaat…	MNKQEFLAEYAVARKNTDSVKWDNLKETFDAEDLLPLWVADTEFKAPKEALEAMTKRIAHGAFGYSLTPDAYFEAYFKWQKERYGIELHREWMRFGTGVVQSLSTLVNLLTQKDDAVLVLQPVYYPFMKVIENNERKLVVSELKHEAGVYSMDPADIEAKITEEQVKLLILCSPHNPVGRVWSEAELAELLELCRQKQVLVIADEIHHDLLLTDKPFVSALEVSEGKYRDNLVVVDAPSKTFNMAALQNSHVIIPNPQMRQRYDKLVERLAAPAGSILGKVAAAAAYEHGASWLKGLLETIQANYDYVKEKLTKAYPQIVISPLEGTYLMWIDLSAVVDPAKLEIFIKNKAGLAVDFGTWFGASGAGHIRVNLATTPENIERAVTALVKALDENQS	Aspartate aminotransferase
NODE_104_length_5252_cov_110.482660	fig|1578.617.peg.33	3234	2176	-	UPF0118 membrane protein YdbI		atggatctttggaaaaagtttatcaataatgtctccttgagacggtttgtcgtcttactaggcatcattggtattttgtatgctttacgtagcttgatcagtatcattttgctgacgtttatcttcacatttctagttgtacagctgacaaattatattcggcgatatgtgaagatcccatcgcaattgatcgtgatcgcgacctatctattgttcatcgggtttatctatttggcggtaacgatctatgtgcctaaactcgctatccaaactgaagcaatgatcaattcactcttgcgtttttatcagcatccaccgcatggagcgcaagatctgatccactatatcgaccgctattttggcaaggtcgatatcatgcaacagttcaagggcagtttt…	MDLWKKFINNVSLRRFVVLLGIIGILYALRSLISIILLTFIFTFLVVQLTNYIRRYVKIPSQLIVIATYLLFIGFIYLAVTIYVPKLAIQTEAMINSLLRFYQHPPHGAQDLIHYIDRYFGKVDIMQQFKGSFGIALGYLKSLGSIGFTFVMSLLLSFFFTIEKDDLYGFSKGFLSGPFAWLFEDIYHFAKIFVNTFGVVLEAQFVIAVVNTVITTICLAIMNMPQLLSLGIMVFVLSLVPVAGVIISAIPMMFIGYSVGGLRYVFYIVIMLVVVHALEAYVLNPKFMASRTELPMFYTFVVLFVAEHLFGVWGLIVGIPIFTFMLDVLGVKPVHSKGERLKKVRKLERKNE	UPF0118 membrane protein YdbI
NODE_104_length_5252_cov_110.482660	fig|1578.617.peg.34	4389	3352	-	Aldose 1-epimerase (EC 5.1.3.3)	5.1.3.3	atggatatctttagaaaagagcttgatacctatgatggacatacggtgacccagatcactttggtcaatgataacggagtcgagatctcatgtttgacgatgggcgcgatttggcaagctttcagcgttccaagtggtgcgggtaagaagaacttattattgagttttgagcatacaaaagattactatgctaatgcgcaaaatatctgtaagtcgatcggtcgggtcgctggacggatcgcccacgggaagtgtgaattaaacggcgagcaagttcaattgccacaaaatgaaaacggtaatacgttacacgggggtcaaaacggttttaacacttataactggaactataccacttcacgtaataaaaatagtgtgagtgttattttccaaaagaag…	MDIFRKELDTYDGHTVTQITLVNDNGVEISCLTMGAIWQAFSVPSGAGKKNLLLSFEHTKDYYANAQNICKSIGRVAGRIAHGKCELNGEQVQLPQNENGNTLHGGQNGFNTYNWNYTTSRNKNSVSVIFQKKITEKMDGFPGNILATIIYTLNNNNKVTISFSALGGSKDSLFNPTNHVYFNLSDRQDLSSHSLKINSSATLETDENNIPTGRVKEVEDTPLDFRDFRNVKAAADEADGFDDAFVVNQPGKGTEPIAVLRDEDSGRQITIDSDRNGLVMYNMPALDTEIKFSRDQGKPAIPGEGLALEAQTLPDAINQENFGDIVLPKNGKRSYHIQFAYDKIK	Aldose 1-epimerase
NODE_104_length_5252_cov_110.482660	fig|1578.617.peg.35	4711	5016	+	hypothetical protein		atgaccgaaacagtagttgaaaaaattgaatcacgacagaaccacagtaaagcgtggcgtttatccgataaggaaagcggttgctttttagatgtgacctttaacattgatcttgaaaaaacgatgaaagagcaacgcaacttctccttttctcgctttgtctcggaacaattgaatgagctttcaaaaatggtcccttcactcacaagcaattatagtttagcgatcgatcgcgcagctgttggtccagcttacttgccattggataacgccaaggcaaagccactcttgacccaactcgcctag	MTETVVEKIESRQNHSKAWRLSDKESGCFLDVTFNIDLEKTMKEQRNFSFSRFVSEQLNELSKMVPSLTSNYSLAIDRAAVGPAYLPLDNAKAKPLLTQLA	hypothetical protein
NODE_105_length_5057_cov_104.573447	fig|1578.617.peg.36	245	3	-	DNA topoisomerase III (EC 5.99.1.2)	5.99.1.2	atgaaacgattagtgttggcagaaaaaccaagtgttgcccgtgatctaagcaagatcttgggagcagaccaaaaacacaaaaattattatgaaggcaaagatcatgtcgttacttgggctcttgggcacttattgactttgaagatgccggaagatttaaaaaatgaatggcagacttggcaaatggaaactttgccaatgatccctaagtgtatcgggactaagccgttgcctaaaaccaaa	MKRLVLAEKPSVARDLSKILGADQKHKNYYEGKDHVVTWALGHLLTLKMPEDLKNEWQTWQMETLPMIPKCIGTKPLPKTK	DNA topoisomerase III
NODE_105_length_5057_cov_104.573447	fig|1578.617.peg.37	904	353	-	hypothetical protein		atgactttgaaattagttacagcgactccagctgatctacctaagataaaagaattatatttgagtgcttttccagccgtagaacggatccctttttggctgttaaaaaagcgcactaagaccgggatagccgaattttgtagtctctatgacgatgataactgggtcggttttatctacacggtcaaaaatgccgaactggtctatgtgttctttttggcgatcaaagaaactgagcgctctaaagggtatggcagtggcttgatggagctcataaaagaacgttatcaagggcaagtgatcggcttaagtgctgaaaagcctgatgcaactgcggctaacaaccatgagcgtttacggcgtttgaagttttatgctaaaaatgagtttttaccgact…	MTLKLVTATPADLPKIKELYLSAFPAVERIPFWLLKKRTKTGIAEFCSLYDDDNWVGFIYTVKNAELVYVFFLAIKETERSKGYGSGLMELIKERYQGQVIGLSAEKPDATAANNHERLRRLKFYAKNEFLPTDFYTAEKGGVEFEFLTQNGQKIRPQAYPELMAQCLGLWQKFLLPIKVVKD	hypothetical protein
NODE_105_length_5057_cov_104.573447	fig|1578.617.peg.38	1620	958	-	putative Zn-dependent protease		ttgaccctttttatcactgctagcttaagtttgggcttgttgtggtttatgactagtccttacgtgctcccagttgtgcgtgagatacagactttggtaactaagatcattccagctcaaggaaagctaccgaatgtcaaaactgaaagcatatcccaaggtgatccaacggcgcaaagttattctgaagataccaatgcgcaggcgtcaaatggcgcccgttggagtaaaaacacagcgactgtttatcttgaagcaagtgatgaacgcttccgaaccgcctatttaagggcgatcgaaaattggaaccaaactggggcttttaactttgatttgactgatgataaaaaacgagcccagatcattttaaaacaacaaaatgatgccaataccagtgca…	MTLFITASLSLGLLWFMTSPYVLPVVREIQTLVTKIIPAQGKLPNVKTESISQGDPTAQSYSEDTNAQASNGARWSKNTATVYLEASDERFRTAYLRAIENWNQTGAFNFDLTDDKKRAQIILKQQNDANTSAAGVTHTMINQLTNRLTSADVYLNSYYLLNAQYGYSQLRITNTAEHELGHAIGLAHDDENVSVMQSAGSYYSIQPKDIEAVKALYQEG	putative Zn-dependent protease
NODE_105_length_5057_cov_104.573447	fig|1578.617.peg.39	2886	1747	-	Cystathionine gamma-lyase (EC 4.4.1.1)	4.4.1.1	atgaaatttgattcaaagttgatccatggtggtatcagtagtgataagacaacaggtacggtgagtgtaccgatttatcaagtctcgacctataagcaaacagaactgggaggaacaccagcttatgaatattctcgaactggtaatccaacgcgccatgcactggaacagctgatcgcagagttagaaaatggtacgcgtggtttagcttttgcttcgggatcggcagcgatccatgctgtttttaatttattttctaagggagatcatgttgtcgtaggaaatgatgtatatggcggaacttttcggttgttgaatacagtcttaaatcgtcttggcttggaatttacagccgtcgatacccgtgatttaaaggcagtcaaacaagcgatccagcca…	MKFDSKLIHGGISSDKTTGTVSVPIYQVSTYKQTELGGTPAYEYSRTGNPTRHALEQLIAELENGTRGLAFASGSAAIHAVFNLFSKGDHVVVGNDVYGGTFRLLNTVLNRLGLEFTAVDTRDLKAVKQAIQPNTKALYLETPTNPLLHVSDLSSLADLAHANELLVIVDNTFATPYLQRPLDLGADIVVHSASKYLGGHSDLVAGLAVTKSQDLGDKLAYLQNAIGAILGPQDSWLLSRGIKTLAVRMRAHNENTRAIFEFLQKHKKVAKIYYPGDPSAPEYELAKKQMRDFGGMISFELVAGADVKAFIESLQLITLAESLGSVESLIEVPAIMTHGAIPRAIRLKDGISDELIRLSVGIEAKEDLLQDLKQALKWA	Cystathionine gamma-lyase
NODE_105_length_5057_cov_104.573447	fig|1578.617.peg.40	3819	2887	-	Cystathionine beta-synthase (EC 4.2.1.22)	4.2.1.22	atgatatatcaagatgtatcacagctgatcggccaaacaccgctgatgaaacttgcagtcgaaacacccaatcatgtatcgatctatgccaagttagagatgtttaatccaggtggcagtatcaaagatcgcttaggggagtatctcatggatgatgcccagaaaaaaggcttgttgacagcagaaacgaccatcattgaacccactgcgggcaataccgggatcggtctagctttagcagctcaaaaacggggcttaaaaacgatcttagtcgtgcccgaaaaatttagccaagaaaagcagatcttgatgcgtgcgctaggtgcaaaaatagtacatacgccaagtggatcagggatcaaaggtgcgatcgctaaagccaagaaattagctactcag…	MIYQDVSQLIGQTPLMKLAVETPNHVSIYAKLEMFNPGGSIKDRLGEYLMDDAQKKGLLTAETTIIEPTAGNTGIGLALAAQKRGLKTILVVPEKFSQEKQILMRALGAKIVHTPSGSGIKGAIAKAKKLATQIPDSYLPLQFENLANPAAYATSLAPEIVTEFTKNKLSLAAFVAGAGSGGTFAGITQVLKQKFPGLTAAVVEPEGSILNGGASHSHLTEGIGVEFIPPFFAKTKPDVIYTISDREAFEQVKQLALTNGLFVGSSSGAALAASLKLAKELPQNSNIVTIFPDSSERYLSKHIYRFEEEI	Cystathionine beta-synthase
NODE_105_length_5057_cov_104.573447	fig|1578.617.peg.41	4133	4609	+	Histone acetyltransferase HPA2 and related acetyltransferases		ttgcctattcgcttagctactaccgctgatctccccgcgatcagtgcaatctatgcttttgcccgcactcaaatggcaaaagacaacaatcctacccaatggggaaagagtcatccgcccttggatctcttaaaagctgatattaccgctaaacacctctatgtcattgaagaagccggaaacatcgggggtgtctttgcttttatcttaggtgaagatccaacatatcagcagatcgatggtgcttggctcaatgaccagccttatggtacgatccatcgcattgctgggaacggtaaaatcaaaggcacctttagtaaggctctagctttttgtgaacagctcgaaccaaacattcgaatcgacacccatcaaaataataaacgtatgcaacatcta…	MPIRLATTADLPAISAIYAFARTQMAKDNNPTQWGKSHPPLDLLKADITAKHLYVIEEAGNIGGVFAFILGEDPTYQQIDGAWLNDQPYGTIHRIAGNGKIKGTFSKALAFCEQLEPNIRIDTHQNNKRMQHLLEKNGFTYCGIILTEEQAPRLAYQK	Histone acetyltransferase HPA2 and related acetyltransferases
NODE_105_length_5057_cov_104.573447	fig|1578.617.peg.42	4973	4848	-	hypothetical protein		atgactaaatttagttttgaagttaaacttaaagctgttcgaatgtatttagctggtattggttcatctactactgcccgaaaattaggcattagtaccttgactccaaaaattttgtatgaatga	MTKFSFEVKLKAVRMYLAGIGSSTTARKLGISTLTPKILYE	hypothetical protein
NODE_105_length_5057_cov_104.573447	fig|1578.617.repeat.1	4879	5024	+	repeat region		ctaatgcctaattttcgggcagtagtagatgaaccaataccagctaaatacattcgaacagctttaagtttaacttcaaaactaaatttagtcatagtaacccccctaagtcagattcttttgtccaacttaggggatttacttca		repeat region
NODE_106_length_4983_cov_75.641414	fig|1578.617.peg.43	519	1	-	Phage portal protein		atgattccaataatcgaagcaatggaaaacgatgaacgcctaagcgtgatcaagaacgttttaccactggtcgatgagatcgataaagcgatgtctgagaaagcaaatgatgttgactattttgctgatgcttacatgaaagttctaagtgcgatccttagtgaagatgatcttgaaaatttgcgcaactatcggatcatcgatctgaagtctagagaaagtgatgatccaagcgaaacaccagaaagcttagatattgactttttatctaaaccaaatgctgatgagacgcaagaaaatctgatcgatcggatcgttgataatctttatcaagtttcgatgataactaacttgaacgataaagattttggcaattcaactggtgtggcactcgaaatg…	MIPIIEAMENDERLSVIKNVLPLVDEIDKAMSEKANDVDYFADAYMKVLSAILSEDDLENLRNYRIIDLKSRESDDPSETPESLDIDFLSKPNADETQENLIDRIVDNLYQVSMITNLNDKDFGNSTGVALEMKYKPMLNLATLKSRGFTESLKDMYQVVFASDLIENISREA	Phage portal protein
NODE_106_length_4983_cov_75.641414	fig|1578.617.peg.44	807	583	-	hypothetical protein		atggatagtgtgatcgctcgtgtttggaaagagtcctgtatctatggcagggcttatttttatgtctacagtcacgatagcgagatctatgttactgatactttaccactcgatacctttgtgatctacgacaatacggtagcacataagccactgtatgcagtttgttatggtcatatcggttcagctaattataagctcacagttttttctgagcattactaa	MDSVIARVWKESCIYGRAYFYVYSHDSEIYVTDTLPLDTFVIYDNTVAHKPLYAVCYGHIGSANYKLTVFSEHY	hypothetical protein
NODE_106_length_4983_cov_75.641414	fig|1578.617.peg.45	1551	1003	-	UPF0398 protein YpsA		gtgcgtttatgggtaagtggctatcgaagttacgaactaggggtctttaaattagatgaccccaagatcgaagttttaaagtattgtttacgtaaaatttttatgcaaaatgctgatatggggcttgagtggatcatttctggaggccaattggggatcgaacaatgggcgttagaagaagcagtttcttttactaaagaatatgtaggcgtcaagaccgcattgatgtatccttatacagaattttccaaaaattggcaagaagataagcagatacagctagcacagttagaacaacaagttgatttttgtgctagcgtcagtaaacaaccctatagttcaccaatgcagttgaaaaattaccaacaatttatgctagcacatacggataaaacggtc…	MRLWVSGYRSYELGVFKLDDPKIEVLKYCLRKIFMQNADMGLEWIISGGQLGIEQWALEEAVSFTKEYVGVKTALMYPYTEFSKNWQEDKQIQLAQLEQQVDFCASVSKQPYSSPMQLKNYQQFMLAHTDKTVLIYDQEHPGKPKFDYEAIKRYQQTHAYELEVIDMYQLQDEAEQYLEQKY	UPF0398 protein YpsA
NODE_106_length_4983_cov_75.641414	fig|1578.617.peg.46	1684	2286	+	RecU Holliday junction resolvase		atggcaatccactatccaaacggcggcttgttcactactaaaaatagtgcgagtaaaaaaagccgcgccaacaatactatttatggaaagcgcggaatgtcgttagaagatgaaataaacgaaagcaacaaatactatctttcagctgggatcgcggtcattcacaaaaagccgacaccgatccagatcgttgatgtttattatcccaaacgtagcgccgcagtgatcaaaaaagcttatttcaaacaagcttctaccactgattacaatggtgtctatcgtggtcattatcttgattttgaagcaaaagagactaaaaataagacctcatttccgctcagtaactttcatgctcaccagataaaacacatgaaagcatgtcaagatcaagctggtatc…	MAIHYPNGGLFTTKNSASKKSRANNTIYGKRGMSLEDEINESNKYYLSAGIAVIHKKPTPIQIVDVYYPKRSAAVIKKAYFKQASTTDYNGVYRGHYLDFEAKETKNKTSFPLSNFHAHQIKHMKACQDQAGICFTIVKFVTTDQVFLMPADILFDYWDAQATGRKSIPKAVIERDGFEIDYALRPRIPYLNYVDLLLEK	RecU Holliday junction resolvase
NODE_106_length_4983_cov_75.641414	fig|1578.617.peg.47	2499	4814	+	Multimodular transpeptidase-transglycosylase (EC 2.4.1.129) (EC 3.4.-.-) / Penicillin-binding protein 1A/1B (PBP1)	2.4.1.129	atggataaaaatccgaaatactcgcgcacaaatggcccgaagaaaaatggtcgtttaaagcgtagcggtaagaaaaaagcttcacgcgctggcaaaaagccaatgtggctcaagatcttaatatcctttgcagtcgccctagtagctgctttagtggttggagtcaccgtcttttttgtctatgcaagcagtgctcctaaattaagtgagcaacagcttgaaagtgccggttcaacggtcatttatgattcaaatggcaaaaagatcatgtctttagggaccgaaaaccggacctatgttgcagaaaaagatatcccacagcaattaaaagatgcggtcatctcgatcgaggaccgtcgtttctataagcatcatggggtcgacccatggcggatcgta…	MDKNPKYSRTNGPKKNGRLKRSGKKKASRAGKKPMWLKILISFAVALVAALVVGVTVFFVYASSAPKLSEQQLESAGSTVIYDSNGKKIMSLGTENRTYVAEKDIPQQLKDAVISIEDRRFYKHHGVDPWRIVSAAMSNASGSAGLQGGSTLDQQLIKLSYFSTKRSDQTIKRKAQEAWLAINMDRQYSKDQILTFYVNKVFMGDGCYGMQTASKYYFGKTLDKLNLAQTALIAGIPNAPSSYNPYTNPEFAKKRRDDVLNAMVANKKITQAQANEAKQESITTGLVEKNTSKTVTSTEKIADPYIKQVIEEAKKKGYDPYKDSLQIYTNLDMAIQKRLYEIANSDEYLNFPDDNIQVASTVIDPDNGNVVAMLGGRKTGDVTFGLNRAVQTDRTNGST…	Multimodular transpeptidase-transglycosylase
NODE_107_length_4923_cov_136.822086	fig|1578.617.peg.48	3834	1	-	hypothetical protein		atgctctcaaaaaataacaagaagcaacaatctcaaaagatggaaccaaaacatcaacgctttacgatcaaaaagtttagtattggggtagcttctgttttgatcgggacgacatttgccgttcatcgaactaatagtgttttagccgatcagacaaataatgagtcaggaactgaaatggtcgaaacctcggccgaagatccaggtgatacatcagctgctaccgaaggggcaaataatgaaaatggagctccagctgaggatgccactaccaatgaaacatctcaagctaaaactccaatgacagatagtaatgagacgactgaagcgccaacttcagaagacactaccacaaccaatgatagcacaactgtatctgaaacaccagaagtagcgact…	MLSKNNKKQQSQKMEPKHQRFTIKKFSIGVASVLIGTTFAVHRTNSVLADQTNNESGTEMVETSAEDPGDTSAATEGANNENGAPAEDATTNETSQAKTPMTDSNETTEAPTSEDTTTTNDSTTVSETPEVATTPKTTPEVTDTTQTTETPAETEARPSETPTAKTPRPEVQPTTEEASAEASILRAAANGEGDQPSAKADGPNVSDALQEELEKNAIYSPGDPTAKQTYSGKAWLDTSRGGLDGMGKDSTPMAGVKVYLQWVNGNGYVSKIYYTTTNADGTFAIDLSDPNGLEQSKFELAGDAKFAIRTWVQNPDPEKYSIVQAGDKIYGFHTRLNRKNESWDFTAGVNRIVNSMVIFQEKMGLEDWLVKPEDQWEMPPNVDGSWPDRGLSGAVTGWV…	hypothetical protein
NODE_107_length_4923_cov_136.822086	fig|1578.617.peg.49	4922	4401	-	Surface protein Rib		gaaggtacgatcgttgtaacatacccagatggttcaaccgatgaagtatcagtgaaggtagtcgtaacagatgaccgcacagatgctgataagtatgaaccacaaacaaaaccagttgaagttttaccaggtgaagttccagatgctaaggatacgatcgctaacttagatgaacttccaaatggtacgacagttgaatggatcgttactccaaatacagcaacaccgggcaaagttaatggtttagtaagggtaacatacccagatggatcctttgatattgttgaagttgaagtgatcgttaaggcagcaactgtaggtaacaatacagatgaaagtaagccagcaccaaaaccaacgaatgttactaaaccggttgctgataacggcaaacaagaa…	EGTIVVTYPDGSTDEVSVKVVVTDDRTDADKYEPQTKPVEVLPGEVPDAKDTIANLDELPNGTTVEWIVTPNTATPGKVNGLVRVTYPDGSFDIVEVEVIVKAATVGNNTDESKPAPKPTNVTKPVADNGKQELPQTGDDSDTSQASVAGVILTALAGVLGLGAVADKKKRKN	Surface protein Rib
NODE_108_length_4836_cov_122.532376	fig|1578.617.peg.50	1380	31	-	Xanthine/uracil/thiamine/ascorbate permease family protein		ttggataatggtcaaacaacagccaccaaagcaggctggctcgaaagaaccttccattttaaagaattaaaaactaatactaaacgggagaccgttgctggcttgactacgttcgtatcgatggcctacattttgttcgtcaatgccaatatcttaggtgaagcagggatggataaaggggctgtcttcacagcgactgccctatctgcgatcattggttgtaccttgatggcatttttagctaattatccgatcgggatcgctcctggtttaggggataatgcatttttcacctattccgtcgttttgacgatggggatcccgtggcagactgcaatggcaggggtcgtggtggcttccgttatctttacgttactttcattattcaagatccgcgaa…	MDNGQTTATKAGWLERTFHFKELKTNTKRETVAGLTTFVSMAYILFVNANILGEAGMDKGAVFTATALSAIIGCTLMAFLANYPIGIAPGLGDNAFFTYSVVLTMGIPWQTAMAGVVVASVIFTLLSLFKIREIVIDAIPHDLKLAMAAGIGIFIAFVGLKGGGIVVASKSSLVELGSLTVPTTWLTIFGFFVTALLMARRVPGSIFIGILATTLLGLVTGLIPMPDKIVSSIPSLAPTFGVGLANLGNINTPQMLAVIIVLLLVTFFDTAGTLVGLAQQAGLMKNDKMPRIGRALMADSFSMLAGSVMGTTPTAAYVESSAGIAVGGRTGFTSLVIAGMFGLSLFFSPLLSVVTTEVTAPALIIVGSLMAQSMRFINWEKFEIALPAFLTIIAMPLTS…	Xanthine/uracil/thiamine/ascorbate permease family protein
NODE_108_length_4836_cov_122.532376	fig|1578.617.peg.51	2869	1652	-	Nikkomycin biosynthesis protein, carboxylase		atgaatttgatcttatttcgctattctccacgtgtagtcgaattaaagtacgtagatgagacaaaatctattattattgcgcccgaaaccttaagaagaaaatatgcagaatatcaaggtgtgaaagctaaagttatttttttaacgatgtatacattaccagagataattaagtgcatcaatgaactaaataagagtgtagaaattactagtattacatcattgagtgaagaagatatggaattagtaggattcttagaagatttttttctaaagaaacgatcgacgtttgttgtgaatactttgtttaaagataaatattatatgcgttcagtgctatatggatgtacagaaataccacaaccaaaatttgaattagtaacatcgcatgaaaaattg…	MNLILFRYSPRVVELKYVDETKSIIIAPETLRRKYAEYQGVKAKVIFLTMYTLPEIIKCINELNKSVEITSITSLSEEDMELVGFLEDFFLKKRSTFVVNTLFKDKYYMRSVLYGCTEIPQPKFELVTSHEKLVGFFEKNKLTEAIVKARNLAGSEEVYKVTKEEISSLPKRIYNGNYLVEEYVELKQMLTCDGFAVGSNIQYIFSNEYEELLLNTLNEQSGYIIRTNHLYWNDIELLKKIFAACKNILEVFTIEEQVTPFHFEWFYDDQSKQFVFCEVGKRFGGGAIPELIQYSFGINILEKYWRSIDHSDEVDCSEHMLLMPAVIATSYSPYLREGVITKVPEKKYFNWTEKTYFFVNVGDKMTSANTIVQNEFLSIFISKSENEYLNNLRRMAYLS…	Nikkomycin biosynthesis protein, carboxylase
NODE_108_length_4836_cov_122.532376	fig|1578.617.peg.52	4145	3000	-	Nucleotidyltransferase (EC 2.7.7.-)	2.7.7.-	atgaattttacgaaagaaaatatagcatttttaccgagacagtttgtggataagcatatgttgatcacagggcagactggtagtggaaaaacgtgtacagctcgatcactgatctaccaacttcaaaaagaaaatgaaactgtaattattttagatccaacgggtgaatatactaaactccctaacatggtcgtatatactttaggagaaaatactttcattgatccagggagtctggaagtaaagcaattattaagagttttagatattgagacctctaccttattaactagtaaagtagaacaagcgatagaatcattgaaaatccaagaaaatattgcggggagaaaagaagtctatttaaagcttggtttaccaatcgctgattatcaggataaa…	MNFTKENIAFLPRQFVDKHMLITGQTGSGKTCTARSLIYQLQKENETVIILDPTGEYTKLPNMVVYTLGENTFIDPGSLEVKQLLRVLDIETSTLLTSKVEQAIESLKIQENIAGRKEVYLKLGLPIADYQDKVEKLKPWMNRYPFALLTKQSLEEFVVPKKDDTADYTLVGQVYDREKINQCWDDFMVLDRRIRGQCFLEMFGAKNQTGRSKYDIDYILSLFLEKRSMKRSLVLDLSRLKKYGNSQKYLMSLILKKILAKRMAAEFNFKVSLFIDEAHRYLPQNEFDMSENGFFQLLREGRKYGISLVLATQSPLDISPKLLSQISNFIIHRTSTLDELEYLNLEVPFEILNKLDVGQAVIYLYPKFYQKVNISLPEECG	Nucleotidyltransferase
NODE_108_length_4836_cov_122.532376	fig|1578.617.peg.53	4775	4239	-	hypothetical protein		atgctttgtgatcagttggattgtatattttgtggtaagagatatctcgaaattgttgattcatttgggataggaagtgagcaattaatatctgatcaaagggtcattaggttgatctctttagtggaaacggtgaaatttattgaaaagtatcagatcacagttgcatcaaattatttaggtcatactgtgaaaaaaatatataaacttctagctatacaaatgtttttgctaaagatagacattgatatgctaaaaaaatgtttgaaaggtgcaactgtcgaagcgatcgataaagaattggtcaagttgcagaagatagatactgacttactgaaaaaatatgatccttttactttatctgataggtacggaattacaaaagaaattcaagatgct…	MLCDQLDCIFCGKRYLEIVDSFGIGSEQLISDQRVIRLISLVETVKFIEKYQITVASNYLGHTVKKIYKLLAIQMFLLKIDIDMLKKCLKGATVEAIDKELVKLQKIDTDLLKKYDPFTLSDRYGITKEIQDALNNSREYVRHYSKKTIKYFTDIPFCGDITGEKDFIETVYKIQAGK	hypothetical protein
NODE_109_length_4726_cov_97.967398	fig|1578.617.peg.54	456	205	-	hypothetical protein		atgaaaaaattatggaattggtggttagctggaggcattaaaggtaagaaacgctatgtgatctttcccttattagaagccgaaggtgttccatttggtatttggcttgtcagtggccgtgaggttagtttcctacactttgtgacaacgcctaagatgttgctttttgttgcgctttgtctaacatttgctgctcctttgctctattttttagacaatgttatggggatcactagaaagatgcatgaataa	MKKLWNWWLAGGIKGKKRYVIFPLLEAEGVPFGIWLVSGREVSFLHFVTTPKMLLFVALCLTFAAPLLYFLDNVMGITRKMHE	hypothetical protein
NODE_109_length_4726_cov_97.967398	fig|1578.617.peg.55	649	491	-	hypothetical protein		atgagtaattacatagattggctaaataaagcttgtgatgttttagtgatatttatagagatgaataattttacagtaccagatagggatagaaaagtgcgaaatttgaatattttagtgatccgtttcatattggagttatcatggggacatagatga	MSNYIDWLNKACDVLVIFIEMNNFTVPDRDRKVRNLNILVIRFILELSWGHR	hypothetical protein
NODE_109_length_4726_cov_97.967398	fig|1578.617.peg.56	3005	846	-	Bacteriocin ABC-transporter, ATP-binding and permease component		atgtcgagtaaatataaaaagatgtatatatcacaaattgacgaatctgattgtggtgtggcttcattagccatgatactgcgttattatggatcagaagtatctttagcatatctacgaaatttagctaaaacaaatattgaaggaactactgcatttggaattataaatgcagcacagaaattaggcttggaaacacaagctattaaagctgacatgaccttgtttgatatgcaagatgttacttatccatttattgtccatgtagtcaaagaaaaaacaatattgcattattatgtggtattaaaagcaacatctgatcatataattattgctgatcctgatccagaaaaaggaatagttaaattaagatatgctgattttgaagcagagtggaca…	MSSKYKKMYISQIDESDCGVASLAMILRYYGSEVSLAYLRNLAKTNIEGTTAFGIINAAQKLGLETQAIKADMTLFDMQDVTYPFIVHVVKEKTILHYYVVLKATSDHIIIADPDPEKGIVKLRYADFEAEWTGVTLFMKPGSKYSPIKETKSNLLSLFPRTFKNIKLIINIVIVAMLTTIISILGSYFFQVLIDNYIPNGMEQMLDIVVMGLIVAYVFNSIFVYSRDFLLAILGQKLSTDIILEYIKHIFELPLEFFSTRKTGEIVSRFTDASKIIDALASMVVSIGLDASIVIIIGVTLFFQSIRLFVITLTALPIYIIVIMTFAKKFEKLNKHQMESNAILSSSVIEDIQGIETIKACNSETVRFNIVSEQFFDYLNKSLSYIKIDSLQQALKIFI…	Bacteriocin ABC-transporter, ATP-binding and permease component
NODE_109_length_4726_cov_97.967398	fig|1578.617.peg.57	3947	3165	-	Three-component quorum-sensing regulatory system, response regulator		atggaaacttatgggatagtggtttgtgaaaatgatcaagttcagttaaaaaatttacatggttttgtaaatagagccgtttggtctttggaagattcgccggatagtaaggataaaacctgtgaagtagtattagtgactactagctatcaagaagttgtaaattatttgaataatacgtatatagatagtggagtatattttttggatatcgatctaggcaaagacgatggtcaaaatggtatagatctggctgaatttatcaaaagtaaagatctaaatgcacagatcatctttattacagcctatgaaaattttgcagcaatgacttatcggcgcaggataggggctgtggattttataactaagacggagcttgaccaaaaacgtttaaatgaa…	METYGIVVCENDQVQLKNLHGFVNRAVWSLEDSPDSKDKTCEVVLVTTSYQEVVNYLNNTYIDSGVYFLDIDLGKDDGQNGIDLAEFIKSKDLNAQIIFITAYENFAAMTYRRRIGAVDFITKTELDQKRLNEALFLAIKRIRELHTVREQTFSYKMGRRLINQNIRDILYIVTTEHSHKLKIVTLDSAGEFLGNIKKIDDENEFLEKISQSCLANPDNIVEIDLKLRTVKFKDGYIEVFPRRNSRKIEKLINKYNVKKR	Three-component quorum-sensing regulatory system, response regulator
NODE_109_length_4726_cov_97.967398	fig|1578.617.peg.58	4725	3961	-	hypothetical protein		agtattttacacaggattatggacttgactcttttttttatagtccaacttttttttgcgatctatttatatcttactatccaaaaagtagcaaaagataaattatttttacaacaattggataacttaaaaatatatacaaaacaacttgaaataaatcaaaaaaatttatgcaagttcaagcatgattatcgaaatatgttaataagtttgcaattaagtgctcaagatagacatgataaagaattgatcgcaagattgaaaaagtattcgaatttttatttagacaataaaggtttatggcagtttaacgatattgataatgtcagagatgacttattaaagagtttattgataagcaagttaaatattatgtttcaacaaaatatcgaaaatact…	SILHRIMDLTLFFIVQLFFAIYLYLTIQKVAKDKLFLQQLDNLKIYTKQLEINQKNLCKFKHDYRNMLISLQLSAQDRHDKELIARLKKYSNFYLDNKGLWQFNDIDNVRDDLLKSLLISKLNIMFQQNIENTFECQTLIEQLPTKDITFDIIRILGIAYDNAIEASLILKNGAKVKSMVYRKASELEFEIKNRFNDTGKSILELKKLGFTTKKGHSGLGLANIEDIKKKHDAILVEYHIFDGWFTFYMSVRVK	hypothetical protein
NODE_10_length_29352_cov_71.423480	fig|1578.617.peg.59	2	202	+	hypothetical protein		actatgaaaatgctgtctgatgatggttacgttaaggaagttgagtttatggattttgtgaaatttttattgacagtcatgttgatctttggtactcgtgactttttgttgacacttgcacaaggatatttagcacaaaaaatgatcgataaaaagcatccaaaaatttatatttacaagcatcaaacaattatgttataa	TMKMLSDDGYVKEVEFMDFVKFLLTVMLIFGTRDFLLTLAQGYLAQKMIDKKHPKIYIYKHQTIML	hypothetical protein
NODE_10_length_29352_cov_71.423480	fig|1578.617.peg.60	254	595	+	Cell division protein GpsB, coordinates the switch between cylindrical and septal cell wall synthesis by re-localization of PBP1		atggaaaatgtaaatcttacgcctaaggacatcgtaaataagaatttttcacgcggtctacgcggttatgactcgaatgaagttgatgaatttttggatcaagttatccaagattatgaagcatacgctaaagaaaatcaacgtcttcaaatggaaaatgatcgtttagtaagcaaagtcgatgaattgacaaagcaagttgcggtcggttcttcgggtcaaacagctcgtccaacgacgaatatgactaatatggatgttttaaagcggttgtctaacttagagcgacatgtttttggtgctcaacttaatgatgatgacgatcgtagtaatcgtttttaa	MENVNLTPKDIVNKNFSRGLRGYDSNEVDEFLDQVIQDYEAYAKENQRLQMENDRLVSKVDELTKQVAVGSSGQTARPTTNMTNMDVLKRLSNLERHVFGAQLNDDDDRSNRF	Cell division protein GpsB, coordinates the switch between cylindrical and septal cell wall synthesis by re-localization of PBP1
NODE_10_length_29352_cov_71.423480	fig|1578.617.peg.61	1096	2232	+	23S rRNA (guanine(2445)-N(2))-methyltransferase (EC 2.1.1.173)	2.1.1.173	atgaaaaaatacaacttactagcaacctgtgctgctgggatcgaagcaattacaggaaatgaattaaagcatctaggctatcaagtggctgttgaaaatggacgcgttcgctatcaaggaacgtcagaagatattatcaataccaatctctggttacgcacggccgaccgggtcaagatcattattggcgaatttaaagcaacgacttttgatgaactttttgaaaaaacaaaggctttgccttgggatgaatatttaccgttagatgctaattttccagttgcgggaaaatctcaaaaatctaaattgcacaacgttcctaatgtacaagcgatcgtaaaaaaagcgatcgttgaaaagctttcagcggtatatcatcgccggtcatttttaccagaa…	MKKYNLLATCAAGIEAITGNELKHLGYQVAVENGRVRYQGTSEDIINTNLWLRTADRVKIIIGEFKATTFDELFEKTKALPWDEYLPLDANFPVAGKSQKSKLHNVPNVQAIVKKAIVEKLSAVYHRRSFLPETGAKYPLEVALNKDKVLLTLDTTGSSLFKRGYRVGKGGAPLKENMAAALVLLAHWYPEKPFVDPVCGSGTLPIEAAMIGHNIAPGFNRDFVCETWDWMPAGLSEELRAKAEQAANYDIELDICGYDIDGKMIEIAKKNAMEAGLSHSIKFKQLAVKDFKTDKEYGVIVANPPYGERLSDEAGVHKLYQEMGDLYRPLTTWSKYILTSDLAFEQYYGQKATKRRKLYNGTLRTDLFQYWGQKKPRN	23S rRNA guanin 2445)-N2methyl
NODE_10_length_29352_cov_71.423480	fig|1578.617.peg.62	2606	2229	-	hypothetical protein		atggtaaaattatacaccgatgccgcaacaaaccaaacccatagcgcggctgggatcttagttatcgctgatcaaaaacaataccaattcaaacaaaaaataacagcctcaaataatcatcaagctgaatttgaagctgctatcttaggttttgaatatttgtctcgaaactttccaaatgcccaaaatgttttctttcactctgatagtaagatcgtgatcgatagcttagataagcgctatagtaagtcatttgcacctgagttggccaaactactcacgctacacgaaaaatttccgttggtcatcgatcaatggatccctgataaacaaaacactggcgctcatagccttgctttacaagctttaaaagcctaa	MVKLYTDAATNQTHSAAGILVIADQKQYQFKQKITASNNHQAEFEAAILGFEYLSRNFPNAQNVFFHSDSKIVIDSLDKRYSKSFAPELAKLLTLHEKFPLVIDQWIPDKQNTGAHSLALQALKA	hypothetical protein
NODE_10_length_29352_cov_71.423480	fig|1578.617.peg.63	2718	3089	+	FIG00742356: hypothetical protein		gtggaacaaaaattttattgtcaacctgatattcccagttcgatcacatgttggtcttatacttttatgatctttttattgagtttgttcttatggttagagatcacagtttttcagatctggactgcaattgcttttgtatgctttgtgctagtcgctgcgatccaattatggcggcgccaattagttattacagaccgtgaagtgaaattcaagcgcgttttatctttaaatgataaaatcatcgctcgtagcgatatcaaagaagtcgtggctacgaaataccaattgaagatcactgaccgatatcggacttattcagttttgatgttaccaaaaagcaaagaaaaatgcttaaaagtgttaaaatag	MEQKFYCQPDIPSSITCWSYTFMIFLLSLFLWLEITVFQIWTAIAFVCFVLVAAIQLWRRQLVITDREVKFKRVLSLNDKIIARSDIKEVVATKYQLKITDRYRTYSVLMLPKSKEKCLKVLK	FIG00742356: hypothetical protein
NODE_10_length_29352_cov_71.423480	fig|1578.617.peg.64	3268	4926	+	Formate--tetrahydrofolate ligase (EC 6.3.4.3)	6.3.4.3	gtgaaagatattgaaattgcacaacaaagtgagatgttaccgatcgttgaggtcgctaaaaaagctggtttaagtggatcagagatcgagcaatacgggcaatataaagcaaagatcaaactaccgttggctgaccgccccaaaactaaagaaaaattgatcttagtgacggctgtcaatccaacgccggctggtgaaggcaagtcgacagttactgttggtttaggcgatgccttgagtttagcaggtaaaaaaactatgatcgccttgcgagaaccatccttaggtcctgtaatgggaatgaaaggtggcgcaactggtggtggctattctcaagtagtcccaatggaagacatcaacttacatttcacgggtgatatgcatgctttgacgactgcc…	MKDIEIAQQSEMLPIVEVAKKAGLSGSEIEQYGQYKAKIKLPLADRPKTKEKLILVTAVNPTPAGEGKSTVTVGLGDALSLAGKKTMIALREPSLGPVMGMKGGATGGGYSQVVPMEDINLHFTGDMHALTTANNTLAALIDNHIYQGNKLGIDQRRVIWKRVLDINDRALRHVVIGLGGVVQGIPREDGFDITVASEMMAILCLAKDIADLKKRLGQIVIGYTYAKEPVTVADLGVTGAIALLLKDALKPNLVQTLAHTPAIIHGGPFANIAHGCNSVLATKTALQLADYTITEAGFGADLGAEKFLDIKVPQLGKAPNTIVIVATVRALKMNGGVAKDQLDHEDLVALEKGFANLKRHIQSMKQYDIPVVVAINKFTADTLAELNMLVELCAKEDTT…	Formate--tetrahydrofolate ligase
NODE_10_length_29352_cov_71.423480	fig|1578.617.peg.65	5094	5543	+	Lipoprotein signal peptidase (EC 3.4.23.36)	3.4.23.36	atgacgttatatatttgtttaatggtcgcggtagttttatccgaccagttgttgaaattttatattcagcaaaatgttccacttaatgttagctatgaagttattccaggtgtcttgtcgatcgggcacgtgcgaaattttggagcggcttggagcatgtggttaggtcaaagatggttactaagtattatttcacttgtagctttggtgatctttggctattattttaagaaattgtaccataactggggctatggactaggtttttcactgttgatcggtggaacactcggaaatttacttgatcgtcttttctctggatatgtggtcgatatgtttgaactggatcttatcgattttccagttttcaacattgctgattgcgccttgactttaggt…	MTLYICLMVAVVLSDQLLKFYIQQNVPLNVSYEVIPGVLSIGHVRNFGAAWSMWLGQRWLLSIISLVALVIFGYYFKKLYHNWGYGLGFSLLIGGTLGNLLDRLFSGYVVDMFELDLIDFPVFNIADCALTLGVIVILITMLKDDEGII	Lipoprotein signal peptidase
NODE_10_length_29352_cov_71.423480	fig|1578.617.peg.66	5568	6473	+	Ribosomal large subunit pseudouridine synthase D (EC 5.4.99.23)	5.4.99.23	ttggtagaagcaacgatcacaacgcaaacgggacggttagataaagttttaacgacgatctttccacagtactcgcggtcccagatccaacaattattggaacagggcaatattttagtcaatgagaccctacaaaagggtaaatacaaggtcaaagcgggcgataagatcagtttgaccgaaccagcgatcaaagagcttgaagtcgaacctgaaaatatcgctttagatatcgtttatgaagatgatgatgtgatcgtgatcaataaaccacagggaatggtcgttcatccggcaccaggacatgaacaccatacgttagtcaatgctttgttatatcattgcccgctttcaacgatcaatggaacttatcgcccaggaatcgtacatcggatcgat…	MVEATITTQTGRLDKVLTTIFPQYSRSQIQQLLEQGNILVNETLQKGKYKVKAGDKISLTEPAIKELEVEPENIALDIVYEDDDVIVINKPQGMVVHPAPGHEHHTLVNALLYHCPLSTINGTYRPGIVHRIDKDTSGLLMVAKNDQAHRSLAKQLKDKTNLREYVALVHGRIKEDSGTIKAPLARSPKDRKKQAVVSGGRDAVTHFKVLKRYQDYTLVSCRLETGRTHQIRVHMKYIGHPLVGDPMYGPKKTLKGKGQFLHAAKLGFTHPKTGEFLTFEAPLPEIFEKQLAYLDKTNKIK	Ribosomal large subunit pseudouridine synthase D
NODE_10_length_29352_cov_71.423480	fig|1578.617.peg.67	6631	7173	+	Pyrimidine operon regulatory protein PyrR		ttggcaaaagaagtgagcgatgcaattacgatgaaacgagcattaacacggatgacttatgagatcattgaaaagaataaaggggtagacgggatcgttttagtcgggatcaagacccgtggtatttatttagccaaacggatcgcagcacgcttgcaacaactagaggatgtaacgatcccggtaggcgaattagatatttccttatatcgtgatgatattcatcatgatcctaacgccaagcatgaaccggtcgtaaaagatagtcagatcggatttgatatcaatgataaacatgtgatcttagttgacgatgtgttatttactggacgaacgatccgtgcggctttagatgctttgatggatcaaggccgaccaaagacgatcaacttagcgatc…	MAKEVSDAITMKRALTRMTYEIIEKNKGVDGIVLVGIKTRGIYLAKRIAARLQQLEDVTIPVGELDISLYRDDIHHDPNAKHEPVVKDSQIGFDINDKHVILVDDVLFTGRTIRAALDALMDQGRPKTINLAILVDRGHRELPIRADFVGKNIPTALNEEVSVYVEEIDGKDGIELKTIK	Pyrimidine operon regulatory protein PyrR
NODE_10_length_29352_cov_71.423480	fig|1578.617.peg.68	7311	8591	+	Uracil permease @ Uracil:proton symporter UraA		atgtcagaaaaagaagtttttagaaataaagatgcactattagatatcaacgataagccgaattttccgcattggttagtcttatcgatccagcatctctttacgatgtttggagctaccgtgctcgtcccattgttgatcggtttgaatccaagtatcgcactcttttgttccggtgtcggaacgatcgtatacttgctatgcacaaaagctaagatcccagcttatctaggttcgagttttgcttttatcatgacgatgcaagttttgatgaaaaattacggctatcctgctgtcggtcagggggccattgcagccggcttagtttatgtgatcgtttctttgatcgttggtaagtttggctcaagttgggtcgataaactattgcctcctgttgtt…	MSEKEVFRNKDALLDINDKPNFPHWLVLSIQHLFTMFGATVLVPLLIGLNPSIALFCSGVGTIVYLLCTKAKIPAYLGSSFAFIMTMQVLMKNYGYPAVGQGAIAAGLVYVIVSLIVGKFGSSWVDKLLPPVVVGPIIIVIGLSLATTAANDAMLNNSNYDLKFFSVAIFTLLLTIGFNIFLRGFPSMIPVLLGIIGGYIFAVMMGIVDFTAVAKAKWFTLPAFDVMFINYDFKWYPAAILGMAPIAFVTMTEHMGHIMVLNKLTKRNFFKDPGLNKTLLGDGFSSIIAGFAGGPPTTSYGENIGVLAMSKVHSVWVIGGAAFFAIVFSFCGKISALIQSIPSPVIGGISFLLFGMIASNGLQILVDNKVNYALKRNLVITSVILVVGVGGTYLQLGNF…	Uracil permease @ Uracil:proton symporter UraA
NODE_10_length_29352_cov_71.423480	fig|1578.617.peg.69	8700	9632	+	Aspartate carbamoyltransferase (EC 2.1.3.2)	2.1.3.2	atgcaacattttgtaacagtcgataatttagatgaaaaacaagttttagcgttgatcaaacgcgctcagtatttcaaacaaggaggacgtccaacttgtgacctaagcgaggtttattgtgtcaatatgttctttgaagattcaactcggacgcatacgagctttgaaatggctgaacgtaaattaggtttgaatgttttgcaattcgatcctaagcaaagctcggtcaataagggcgagactttatatgatacattgttgacgatggatgctttaggtgtgaaactagctgtgatcagacattctcaaaatgaatattatgcaccattgatagaactaggtgctgaacaaacgctagatatcgggatcatcaatggcggggatggaagtggtcagcat…	MQHFVTVDNLDEKQVLALIKRAQYFKQGGRPTCDLSEVYCVNMFFEDSTRTHTSFEMAERKLGLNVLQFDPKQSSVNKGETLYDTLLTMDALGVKLAVIRHSQNEYYAPLIELGAEQTLDIGIINGGDGSGQHPSQCLLDMLTIYEQFGKFAGLKVALVGDLTNSRVAKSNMELLHKLGATVYFSGPSYWYDEAFEEYGTYRSLDELVAKVDVLMLLRVQHERHGATEEQTFSKESYHQKYGLTTKRYAKLKDDAIVMHPGPINRDVEFASSLVEAKKSRFKAQMQNGVFMRMAMLEKVIEGCELGGKTK	Aspartate carbamoyltransferase
NODE_10_length_29352_cov_71.423480	fig|1578.617.peg.70	9629	10906	+	Dihydroorotase (EC 3.5.2.3)	3.5.2.3	atgaagttattgcttaaaaatgggacagtttatcaagctggtaaattattaaaaaatgatctgttggtcgaaaacggcgtgatcacagccttaggcacggagctaaaagcagatagcgctcaagtgatcgatgtgaccgataaattagttgctcctggtttagttgatgttcatgtacactatcgcgaacccggttttacacataaagaaacgatcaaaactgggagtttagcggcagctcatggagggtataccactgtttgtgcgatgccaaacttagatcctgtccctgatacaccagctaaagttactgctcaagtggcgttgaatgaggctgatggagtcgttaagatcaaacaatatggtgcgatcacagcaggtttgaaaagtgatgagcta…	MKLLLKNGTVYQAGKLLKNDLLVENGVITALGTELKADSAQVIDVTDKLVAPGLVDVHVHYREPGFTHKETIKTGSLAAAHGGYTTVCAMPNLDPVPDTPAKVTAQVALNEADGVVKIKQYGAITAGLKSDELLDYAGMKAAGAFAFSNDGCGVQTAGTMYQAMLAAKKLDVALVAHVEDNSLLFGGVMNAGKKAKELGLPGILGISESSQIARDLLLAKETGVHYHVCHVSTKESVELIRIAKKHGINVTCEVSPHHLLLSEDDIVKNDGFYKMNPPLRANEDQQALLTGILDGTIDMIATDHAPHSIDEKTGDMRTAAFGITGSETAFALLYTQLVKQQQVLTLEQLLELMSKNPAEAFKFEAGSIFAGAKADLAVFDLKHETTITEADYFSMGKNT…	Dihydroorotase
NODE_10_length_29352_cov_71.423480	fig|1578.617.peg.71	10908	11993	+	Carbamoyl-phosphate synthase small chain (EC 6.3.5.5)	6.3.5.5	atggagcgttatttagttttagaagatggtacagtattttcgggggaagcttttggttttgaagggcaaacgaccggagaagtggtttttacaacggggatgacaggttatcaagaagctgtaacagatcaatcatttgctaatcagatcttagttttcaccaatccgttgatcggaaattacggagtcaatctggatgattacgagtcgctcatgccaaattgttgtggggtcatttgtcgtgaggtggcacgtgtttctgacagttggcgcaagcaagggacttttgatgatttcctaaaacaaatgcagatcccaggtctttgtcatatcgatactcgggcattgactaagaaattgcgtgaacatggaacgatgaaggggtgtttggtcgattca…	MERYLVLEDGTVFSGEAFGFEGQTTGEVVFTTGMTGYQEAVTDQSFANQILVFTNPLIGNYGVNLDDYESLMPNCCGVICREVARVSDSWRKQGTFDDFLKQMQIPGLCHIDTRALTKKLREHGTMKGCLVDSVHDMTHTLDQLRATVLNDRVVEQVSTTKPYPNPGEKRNVVLVDYGLKHSILRELSKRDCNTIVLPSSATAQDILKLKPDGVMLSNGPGDPKDVLHAVEMVKEVQKHLPLFGICLGHQIFALANGADTYKMKFGHRGFNHPVREIATGRINFTSQNHGYAVDPATVDKAELIITHREINDGTVEGLRHKRYKAFSVQFHPDAAPGPHDAVDLFDDFMHMIDQRKEEENA	Carbamoyl-phosphate synthase small chain
NODE_10_length_29352_cov_71.423480	fig|1578.617.peg.72	11986	15162	+	Carbamoyl-phosphate synthase large chain (EC 6.3.5.5)	6.3.5.5	atgcctaaacgaacagatattaaaaaaatcatggttctgggatcaggaccgatcatcatcggacaagccgctgaatttgactattctgggacacaagcttgtatggcgttacgtgaagaaggttatgaagtagttttagtcaattccaatcctgcaactatcatgacagatactgacattgctgatcgggtctatttagagccattgacggtcgaatcagtttcacgcatcatgcgtcaagaatatcccgatgctttattgccaacattaggtggtcagatcgggttgaacttagcgatcgcattgcataaaagtgggatcttagatgagcttgggatcgaacttttaggtacaaaattatctgcgatcgatcaagctgaagaccgcgagaaattcaaa…	MPKRTDIKKIMVLGSGPIIIGQAAEFDYSGTQACMALREEGYEVVLVNSNPATIMTDTDIADRVYLEPLTVESVSRIMRQEYPDALLPTLGGQIGLNLAIALHKSGILDELGIELLGTKLSAIDQAEDREKFKELMLQLNEPIPASKTVNTVAEALEFAETIGYPVIVRPAFTMGGTGGGLCDTPAELEEIAANGLDLSPATQCLIEKSIMGHKEIEFEVMRDSANNAMVVCSMENFDPVGIHTGDSIVVAPTQTLTDREYQMLRDCSLKLIRALKIEGGCNVQLALDPNSFNYNVIEVNPRVSRSSALASKATGYPIAKMAAKIAVGLTLDEIKNPVTQTTYAEFEPALDYVVAKIPRWPFDKFAQADRTLGTQMKATGEVMAIGRNLEEALQKAVRS…	Carbamoyl-phosphate synthase large chain
NODE_10_length_29352_cov_71.423480	fig|1578.617.peg.73	15176	16114	+	Dihydroorotate dehydrogenase (NAD(+)), catalytic subunit (EC 1.3.1.14)	1.3.1.14	atgtcaaggttatcagtcaaattaccaggtttagagctaaaaaatcctatcatgccagcaagtggaacttttggctttggagatgttggcgcagctcaaaaatttaatttgaatactttaggggcgttagttatcaaaacgacgacacctgaagcgcgtgacggcaatcccaatcctaagatcgccgtattggacaatggggtcatcaatgcggtcggattacaaaatccggggatcgtagccgttattagtgaaaaattaccagcattaaaaaaggattatcccgacttgccagtgttaggtagtgtgggggggtcgacggttgctgattatgtggaagttgctaaaaaactctccgattctaatttagtgaccgctttagaattgaacatctcttgt…	MSRLSVKLPGLELKNPIMPASGTFGFGDVGAAQKFNLNTLGALVIKTTTPEARDGNPNPKIAVLDNGVINAVGLQNPGIVAVISEKLPALKKDYPDLPVLGSVGGSTVADYVEVAKKLSDSNLVTALELNISCPNVHEGGMAFGTDPQTAAELTKQVKAVSKVPVYVKLSPNVTDVVAIAKAVEVAGADGLTMINTLMGMSLNLKTRKSVLGNLTGGFSGHSIKPIAIRMIYQVSHAVDIPIIGVGGIKSAKDIIEMYLAGASAVQVGTAHFYDPLICPHLVAELPKVMDELGIESIEKLIQEVREARDNEA	Dihydroorotate dehydrogenase
NODE_10_length_29352_cov_71.423480	fig|1578.617.peg.74	16104	16820	+	Orotidine 5'-phosphate decarboxylase (EC 4.1.1.23)	4.1.1.23	atgaagcttaaacgtccgatcattgctcttgatttcaatgatgctcagcgaacgcttgattttttacaaaattttccgcaaacagagaaactttttgtaaagatcggaatggaattatattacagtgcaggtcaagatctagttaaagcgatcttagagcaaggacacgatgtctttttagatctaaaatgtcatgatatcccgcacacagtcgaacgggcaatgtatgttttaggtcaattaggggtcagtctcaccacaacgcatgctaatggagggcatgagatgctcaaggctgctaaatatggcctagttgaaggtgcactaaaagctggtaaaaaagaacccaaattattagcgatcacgcaattgacctcaactgatgagcgcatggtcaaa…	MKLKRPIIALDFNDAQRTLDFLQNFPQTEKLFVKIGMELYYSAGQDLVKAILEQGHDVFLDLKCHDIPHTVERAMYVLGQLGVSLTTTHANGGHEMLKAAKYGLVEGALKAGKKEPKLLAITQLTSTDERMVKEEQLITVGLDKSVENYAKLAQNAGLDGVVCSGWEANKLREVTGPEFLRITPGIRLKNDSLGDQKRVMTPDMAAQNGSSAIVVGRPITQAKDPVTAYQAIFELWNQ	Orotidine 5'-phosphate decarboxylase
NODE_10_length_29352_cov_71.423480	fig|1578.617.peg.75	16836	17462	+	Orotate phosphoribosyltransferase (EC 2.4.2.10)	2.4.2.10	atgaaagaaatcgcaaaagacttactcaaaattcaagctgtaaaattatctcctaatgaaccttttacgtgggcaagtgggatcaaaagtccgatctattgtgataaccgtttaacgatcagctatcctaagatcagaacagcgatcgccaaaggaattgcagaattgataagcgaaaggtatccaaaagtcgaggtgatcgccgggacagctacggcagggatcccacatgcggcttggatcgctgctgaattagatttgccactggtttatgttcgatctaaacctaaagatcatgggcgtggtaaacagatcgaaggtgttttgcatcctggagctaaaacagtcgtgatcgatgaccttttatcaacagggggcagtgtcttaaaagctgttaaa…	MKEIAKDLLKIQAVKLSPNEPFTWASGIKSPIYCDNRLTISYPKIRTAIAKGIAELISERYPKVEVIAGTATAGIPHAAWIAAELDLPLVYVRSKPKDHGRGKQIEGVLHPGAKTVVIDDLLSTGGSVLKAVKAAQNEGADVLGVGAIFSYQLQAIVDNFRQADLSYFTLTNYSELLEAAVETNYISTTERAALEKWRHDPENWSAKA	Orotate phosphoribosyltransferase
NODE_10_length_29352_cov_71.423480	fig|1578.617.peg.76	17612	18553	+	Cell envelope-associated transcriptional attenuator LytR-CpsA-Psr, subfamily F2		atgcctgatgaacaacataaacataagcatcatcataaaaagaaaaaacgttggtggaagtgggtcttgatcgcattaggactctttttactagtcgatgcagttattgtaggtaaactctatttcgatgccaaaaaagctgtcgatgttacatataaagctgtcaaacatgacgataagcgcaccggcagtgtcaatttagacaacggacaaccgttttcagtccttttattaggaagtgatactggtgagtatggtcggactgaacaagggcgttcggatacgatcatggtagcggctgttacgcctaacaagactgaattgttgagtattccacgcgatactttagttacgatcgcaggccatccaggtaataataagatcaatgcagcttattca…	MPDEQHKHKHHHKKKKRWWKWVLIALGLFLLVDAVIVGKLYFDAKKAVDVTYKAVKHDDKRTGSVNLDNGQPFSVLLLGSDTGEYGRTEQGRSDTIMVAAVTPNKTELLSIPRDTLVTIAGHPGNNKINAAYSYDGVSGALNTLQSYLDIPIDHYIEINMKGLEQLSEAIGPVKVDNDLEFTNLDVHFPKGEVTINADNILAYTRMRYEDPRGDYGRQLRQRQVLTALVEKAASIDSLAKYHSILNAISANMKTDLTFDDIKDIVTNYGGAKNIDQIQLKGNGQMIDGVSYEVVPKENLDKVQAQLKQTLNLK	Cell envelope-associated transcriptional attenuator LytR-CpsA-Psr, subfamily F2
NODE_10_length_29352_cov_71.423480	fig|1578.617.peg.77	18981	19931	+	Transcriptional regulator, LysR family		atgaagacacaacaagaaaacatcttttcatcaaagacgttgacctatttcttgcaattagctgaaacgatgagttatacccaagcagctcagatcttggggatcacccaaccggcattgactcaacaaataaagaaattagagcgaacagtcggagcaccactattttattcagttggtaaaaagttgcacctttctgatgcaggctacaccatgttagatgcaactcaccagatctatgaaacattaaataaagcagctgatgagatccaacaatcaacaagtgcgactcaagggacgatcaacattgggatcttagcttcgatcgaggatcaagtcttcacggattttgcgatcgagtattacgaaaagaataacggtatcaaactttccacacat…	MKTQQENIFSSKTLTYFLQLAETMSYTQAAQILGITQPALTQQIKKLERTVGAPLFYSVGKKLHLSDAGYTMLDATHQIYETLNKAADEIQQSTSATQGTINIGILASIEDQVFTDFAIEYYEKNNGIKLSTHMLTRKEIWERLENNTIDLAVMYLPDESIKNWKPYETKKIITEDLIFLHNNERLEKRKRVRFKDTLNNKWVTYPPQYYLNDTIREAYKNAMVDHPNSVAHFATPEQLFEFAKRTGSYTALPMSFVTAKNHGEMGMALFEPEIKFDLAFVFRRGKDQIPRINSFLKTFDSYLAKKDYVSRLKESL	Transcriptional regulator, LysR family
NODE_10_length_29352_cov_71.423480	fig|1578.617.peg.78	20116	21042	+	Manganese-dependent inorganic pyrophosphatase (EC 3.6.1.1)	3.6.1.1	atgaaagaattagttttcggacataaaaatccagatacagatgcgatcgtagctgctaaagcttacgcctttttacaaaacgctttgggcaatgaagtcgaagctgtggctttggggacaccaaacgaagaaacaaaatttgttttagaacattttgaagaaccagcaccacgtgtgatcgaaaaggcagcacctgaagttgaagctgtaatgttggtcgatcacaacgaagaacaacaaagtgtcgctgatattgctgatgtgacagtcacacacgttgtcgatcatcaccggatcgctaactttgcgacagctgcacctttgtactatcacgctgagccagttggctgtacaagtacgatcatttacggtgaattcgtgcaaaataacgttgagatc…	MKELVFGHKNPDTDAIVAAKAYAFLQNALGNEVEAVALGTPNEETKFVLEHFEEPAPRVIEKAAPEVEAVMLVDHNEEQQSVADIADVTVTHVVDHHRIANFATAAPLYYHAEPVGCTSTIIYGEFVQNNVEIPAKLAGLMLSAIVSDTLLFKSPTTTAKDEAAAKALAKIANVDLEAYGLEMLKAGTNLASKTEEELITADAKSFDMGGKTVRVDQVNTVDLDEVFAREAALRAAIEKQSAAEGYDLFLLMVTNILDSNTRLLVIGEPKEMVEKAFEKELVADKVDLPGVVSRKKQIVPQLEAAFNA	Manganese-dependent inorganic pyrophosphatase
NODE_10_length_29352_cov_71.423480	fig|1578.617.peg.79	21255	22013	+	Transcriptional repressor GlcR, DeoR family		atgagtcaagaaaagagaattgaattgatcaaacaattattagaagaaaggcaggaattgtcgactaaagatatcatgcaggaatttgggatctcacaagatactgcgcgacgtgatatcgtgttgttagctaaacgtggtgaagttagacgtacacatggtgggatcttgccattagattttgggcgtagcgtaccaaactttcaaagccgtttagcccgtttcactaaacaaaaaacgcagatcgccttagcagctgcgacctattttaaaccacatcatgtttattttgtcgattcgtcgacgatcttattgaagacttgtcaaaatatcaatatgcctctaacgatcgtgactcattctttagataattgtatggctttagctgagcataataag…	MSQEKRIELIKQLLEERQELSTKDIMQEFGISQDTARRDIVLLAKRGEVRRTHGGILPLDFGRSVPNFQSRLARFTKQKTQIALAAATYFKPHHVYFVDSSTILLKTCQNINMPLTIVTHSLDNCMALAEHNKVRVKVLSGTLNHENRYFYSNLAIEELQNVVFDTAFIAASGIDENGAYLLDQDDAQIVGMAVKRARKVILVAEHQKFVNKSYYRICPLDKISLFITDQAPTPEQRAMFAPETKIIVTKEA	Transcriptional repressor GlcR, DeoR family
NODE_10_length_29352_cov_71.423480	fig|1578.617.peg.80	22135	22671	+	Substrate-specific component BioY of biotin ECF transporter		ttgaagaataaattatattacatatctttagctagcatcatgctcgctttactgatcgtttgttcacaattaacgatccccttgcccatgataccgttgacgcttcagacattggctgtcggcttattagcctcgatcttaccgctaagatatagtttacagaccattttagtgtatctattactagggtttatcggtttaccggtctttgctaattttaaagggggactaggcgtcttatttagtaatactggaggctatttattgggctttttagtttatgttatgattgttggctcaatggtcgctaaaaagcaaacatttaactggttattcctggctaacagcttaggagccctaatgcagttattatgtggttcactgtggttacttgtgatc…	MKNKLYYISLASIMLALLIVCSQLTIPLPMIPLTLQTLAVGLLASILPLRYSLQTILVYLLLGFIGLPVFANFKGGLGVLFSNTGGYLLGFLVYVMIVGSMVAKKQTFNWLFLANSLGALMQLLCGSLWLLVISDINLENALLIGTVPFLLPGAIKVILVCICAQIYYREFTKRSAKI	Substrate-specific component BioY of biotin ECF transporter
NODE_10_length_29352_cov_71.423480	fig|1578.617.peg.81	22787	23947	+	Aspartate aminotransferase (EC 2.6.1.1)	2.6.1.1	atgcaagctagatttaaccataagatcgaagctattgctgtatcagacattcggcaattcgatatggaagtcagtcagatcgaggggatcattaagttaacattaggggaaccggattttaatacaccggagcatgtaaaacaagctgcgatcgcggcgatcaatgcagatcagtcacactatacacctaattcggggatcatggagttgcgacgggctgccgctgagtactataaggaaaaatatgctctagatcatactccagaacagatcattacgacggtgggagcaactgaagcgatcgcagcgagtttgcaaacgatcttaaatccaggagatacagtcttaatgccaacacccgtctttccgatctatgctccgatcagtcagctaaatgga…	MQARFNHKIEAIAVSDIRQFDMEVSQIEGIIKLTLGEPDFNTPEHVKQAAIAAINADQSHYTPNSGIMELRRAAAEYYKEKYALDHTPEQIITTVGATEAIAASLQTILNPGDTVLMPTPVFPIYAPISQLNGADVLQVDTSADGFILTPEKLRATLEANKDKNIKAVVLVYPSNPTGATYTKEQLVALAKVIAEYDIWALCDEVYAELTYEGQHVSLASFLPENTIVISGLSKSHAMTGWRLGFILGPKDFSEQVVKVHQYMVTAPTTNVQFAALEALTKGKDDALSMRKEYQARRDFMRQALADAGFEVVKPDGAFYLFAKIPAKCGHDSWKFVRELAKKAKVALIPGVSFGQGGEGYVRLSYAASMDDLRQASERIKKFTDNY	Aspartate aminotransferase
NODE_10_length_29352_cov_71.423480	fig|1578.617.peg.82	24019	24804	+	Glutamate racemase (EC 5.1.1.3)	5.1.1.3	atgacggaaaacaaggctttagctccgatcggagtatttgattcaggtctcggcggcatcagtgtcttacgtgagatctataagctcatgccaaatgagcgctattatttctttggggattcgaaaaatgccccttatggtaccaaaagtgtagctaaagtcaaagctttgagtgaagcgatcgtagaggattttatccaacaaaaaaaagtcaaagcgatcgtgatcgcttgtaatactgcgacaagtgctgcggccacatatttacgtcaaaagtacccagaaattccgatcgtcggactggaaccagctgttaaaccagctattttgcatcaaaccgattctaaagtcttagtgatggcgactccattgactttaaaggaagaaaaattcaatcat…	MTENKALAPIGVFDSGLGGISVLREIYKLMPNERYYFFGDSKNAPYGTKSVAKVKALSEAIVEDFIQQKKVKAIVIACNTATSAAATYLRQKYPEIPIVGLEPAVKPAILHQTDSKVLVMATPLTLKEEKFNHLMERFVDQGEIIKLPAPKLVEFVEKGELDSAKLYAYLEDILAPYKGNVDSVVLGCTHFPFVKKAIQDVIGKDVAVFDGGAGAARELKHLLTQKQLLSPNQAVGEITFENSNATPGELELSQKLMNLAD	Glutamate racemase
NODE_10_length_29352_cov_71.423480	fig|1578.617.peg.83	24875	25786	+	Permease of the drug/metabolite transporter (DMT) superfamily		atgacaaaacaacaaaaactctggacgctactgacgatcttgtcgacttttctttggggcgtgtcgggcttatttgctaaattcatttttgagctcgagcctaaattgactccacttttattgagtcagatccggatgcttggtgggggactagtattattagccttggccagttataaaaaggaagctcccttagcgctttggcaaaataagcaaagtgcaaaaacggcgatcgcttatgggctaggcggaataattccagtccaattttgttattttatggcgatcaaattaggtgatgcttcgatcgcaacgatcttacaatttgttggaccatttttcattattttgtatctagctgtctttcaaaaacaacgaccacgccggatcgaagtgatc…	MTKQQKLWTLLTILSTFLWGVSGLFAKFIFELEPKLTPLLLSQIRMLGGGLVLLALASYKKEAPLALWQNKQSAKTAIAYGLGGIIPVQFCYFMAIKLGDASIATILQFVGPFFIILYLAVFQKQRPRRIEVISALVAFLGVALLATHGDLTQLAITPAVLIWGLLSAVGGATNTLIPRSLLQHYSSTAVTGWGLLIAGIGLTVIHPSLESFSVTFELVLLVLAVVVLGTIIPFQLFTNALKYIRPTTASMLDAFEPIAATIGSIIFFGLQLSGADLLGSFLVIIAVLALNWRPRKKKFTNNI	Permease of the drug/metabolite transporter DMT superfamily
NODE_10_length_29352_cov_71.423480	fig|1578.617.peg.84	26089	26556	+	hypothetical protein		atgttagaaaaaattcgggtcaggcgtcgttcaaatgaagtgatcagtactggcgatgttgttaactatcgcaaagccacatttgttgtaataaatattttaagtattaaagttgttccacgtgctacaggtgaatttatctattatgactgtttatgtcaacagctccaaacgccagatctgtcggctgaatatacgacgacccaagccgagatcatgtatcaaccgcacgaatttcgtgaagtctctgaagttggggaatttatctatgatgaaagtaccgggatttgggtccagatcgatgccattttgaatgtacgctttgaagataaaaatatgtatgttaaatatgaattcgcaccggtagtcgagtggtcaaataaagagatgcaaacggca…	MLEKIRVRRRSNEVISTGDVVNYRKATFVVINILSIKVVPRATGEFIYYDCLCQQLQTPDLSAEYTTTQAEIMYQPHEFREVSEVGEFIYDESTGIWVQIDAILNVRFEDKNMYVKYEFAPVVEWSNKEMQTAVVKQRRKCMKLLKPKTNNLVND	hypothetical protein
NODE_10_length_29352_cov_71.423480	fig|1578.617.peg.85	26572	27411	+	hypothetical protein		atggctaaaatagcgataatttcggatatccatggtaatttgacagcgttagaggctgttattgctgatatcaaagctaaagcagttgatgaggtctgggtcttaggtgatattttgatgccgggaccggggggaaaacagatcttagaattactccattcattacagccaaccgtatttatccgaggcaattgggatgatctgttgttacacgggtcagctggtaagatcgaattgaccaaacctagtcatgtgtatttttctaaattagcaatggcttgtggtcaagatctagggcaagctgaattagaatttttagctaaaaatccgatccaacaaacacttagacgtggtccattgacgatcagtgtctcacataatttgccagatctaaattat…	MAKIAIISDIHGNLTALEAVIADIKAKAVDEVWVLGDILMPGPGGKQILELLHSLQPTVFIRGNWDDLLLHGSAGKIELTKPSHVYFSKLAMACGQDLGQAELEFLAKNPIQQTLRRGPLTISVSHNLPDLNYGQKLYPTRPQTDFDAVLAGISADLAVYAHVHHQLMRYTTAEQIVLNPGSVGEPFCDWKKFQADLRAQYALLEIDDAGIGGIAFCKVAYDHQKELELAKKANIPYLKLYEKLLTTGKVYTHDQELLAQYNEKYGYEQEVRAYQNKMR	hypothetical protein
NODE_10_length_29352_cov_71.423480	fig|1578.617.peg.86	27499	28422	+	hypothetical protein		atggatctacaaacgagccaagctacacaattagctgagatcgattatttagaacgctttatcaattttatcgatgcatcacctaatacgatccgtacttataaaacctcattaaaacaatggtttaattacaccaaacaacaacagatcacaaagccgactccgcaagatgtcaaaaactatcgtgaatctttgctagcaatggggttacgaccaacgaccgttcaaaattatctaatggcggtcaaacaatttttcaaatggaccgaagaaatgggactttaccgtgatattgctaaaaatgtcaagggtttaaagctaggaacggaacataaaaaagattacttgacttctaagcaagcggcggcagttttggaaaatatcgatcgcagtacactc…	MDLQTSQATQLAEIDYLERFINFIDASPNTIRTYKTSLKQWFNYTKQQQITKPTPQDVKNYRESLLAMGLRPTTVQNYLMAVKQFFKWTEEMGLYRDIAKNVKGLKLGTEHKKDYLTSKQAAAVLENIDRSTLKGKRDYAMLALMLTMALRTIEVRRANIEDMRVSGDVVVLYIQGKGHIEKDAPIRMPDQVETAIREYLRARKEFNSQAPLFASTSNNNLGKRLSTRSIRGIVKKCFIAAGYNSPRLTAHSTRHTSATLNLLNGATLEETQQLLRHTNIQTTEIYAHHLNSLNNKSSDRISDAIFK	hypothetical protein
NODE_10_length_29352_cov_71.423480	fig|1578.617.peg.87	28768	29247	+	hypothetical protein		atgtcaaccaccactgactttagtcagtggtggttgactgaaggacgtgccgctggcctacaatattcgcaaccacttagaaaccgctggccacagtatgcagattgtagttcatttgttacaagatgtgtaaatgcttatatgggactaccaacaacaacgctatacacaactgatagtttgcacgcgtatatagagagcttaggctggaaaaaaatttttgaaggtaacaagcataacatgccactggacagcaaagaagctgatataatcatcacgggggtaaagggtcatagtattggcgacgctggacacacattatttgtgatcgatagcagcggtaatactatcgaatgcacaggagtaccagcccgcccgccttatggtgatgggaatgtt…	MSTTTDFSQWWLTEGRAAGLQYSQPLRNRWPQYADCSSFVTRCVNAYMGLPTTTLYTTDSLHAYIESLGWKKIFEGNKHNMPLDSKEADIIITGVKGHSIGDAGHTLFVIDSSGNTIECTGVPARPPYGDGNVLCKSTLQAQRDVWLTSSSYWYKYRRS	hypothetical protein
NODE_10_length_29352_cov_71.423480	fig|1578.617.peg.88	29253	29351	+	hypothetical protein		atgagtgagatcagtattttaccttttgaagatagtaaaaattcaagttttttaatgacgcctagccggaaatcccgtgactttagtcatgggatggat	MSEISILPFEDSKNSSFLMTPSRKSRDFSHGMD	hypothetical protein
NODE_110_length_4635_cov_127.398522	fig|1578.617.peg.89	1134	1	-	Neutral endopeptidase O (EC 3.4.24.-)	3.4.24.-	atgggggaaaatacaactgtcaatgaagctttgctaaaagatgatctttaccaagccgtcaacggcgaatggctcaaaaccgccattatcccagccgacaaagcaactacggggggctttgccgacttggccgacaatatcgaagaaacactgatggctgattttggcaaaatgttgaccaaaaaagaccgaccacagaccaaagaaatggcagaatttgtaaagttttatcgccttgcgtctgattttgaagctcgtaacaaagctggtgctactccagctaaaaagtatttagataaggtcttagccttaaaagatctaaaggcttggcaagacgctttgccagagctgatccttgaaaattacgatgcaccgtttgaactctatgtttcaccggat…	MGENTTVNEALLKDDLYQAVNGEWLKTAIIPADKATTGGFADLADNIEETLMADFGKMLTKKDRPQTKEMAEFVKFYRLASDFEARNKAGATPAKKYLDKVLALKDLKAWQDALPELILENYDAPFELYVSPDMKDTKHYALHADVPSLFLPDKTYYEPGNEQAKTLLQILEQMLTELFKLAGYDEAFSQKTIAQALAYDKKLAPFQKDSTERADYVKSYNKYTFQDFVSLSAHVDLAKVVTSLLGKAPEQVIVSEPKYYAALNELVNEQTFESMRSWLFVKTLLGLTGLLSDEIRVLGGTYNRALSGSKEAMNPQKAAFYLATNQYSQVVGLYYAHKYFGAQAKADVHHMVEKMIAVYKKRLEENEWLSDETRKKAI	Neutral endopeptidase O
NODE_110_length_4635_cov_127.398522	fig|1578.617.peg.90	2006	1155	-	oxidoreductase of aldo/keto reductase family, subgroup 1		atgagtttgatgaacacatatacacttgaaaacggcgttaagatcccagttttaggttttggtacttggcaaactcctgcaggtaaagtagctaccgatgctgtcttagctgcacttgatgctggttttacccatatcgatactgctgaaatgtatggcaacgaaaaaagtatcggtcaagccgtaaaagcaagcggaatcgctcgtagtgacctttttatcacaagtaaattggataatcaggctcatacttacgaactggctactcaagccctcgatcgttctttatccgaccttcagaccgactatttggacttatttctgatccattggcctaatccaaaagctttccgtgatcatgactgggaaaaacatctccaagagacttggcgtgcccta…	MSLMNTYTLENGVKIPVLGFGTWQTPAGKVATDAVLAALDAGFTHIDTAEMYGNEKSIGQAVKASGIARSDLFITSKLDNQAHTYELATQALDRSLSDLQTDYLDLFLIHWPNPKAFRDHDWEKHLQETWRALEDAYTAGKVKAIGVSNFKPKHFEVLKKTQKIQPMVDQIRICPGDVDHLTIDYCQQHDILLEAYSPFGTGQIFANETLKALAQKKKRSVAQLCLRWSLQHGYLPLPKSVHPARIKENTEVFDFELTESEMQQIDALQGVAGFATDPDTADF	oxidoreductase of aldo/keto reductase family, subgroup 1
NODE_110_length_4635_cov_127.398522	fig|1578.617.peg.91	2273	2980	+	RNA-binding protein Jag		gtgaaattttggggcaagacaacacaagatgcgatcagatctggcttagaggaattgcataagactaaagcacaggtcgaagtaaaagttatcagcgaaggaagaaagggctttttagggtttggtaagaaaccagctgaggtggaactcgttgttaaggaagaaacaacacataaaaatgctgggcgaccacacgctaaaaaagtggctgttgcaaaacaaaaggttgaagactgggagaaatatctgcacgaattaggctactatttggcagatgtcacacagaagatggggatcaagacaacgatcgatgtggtggtggaaaaacgggtcgtgacctataattttgaaactaagcaggaaggtagcttgatcgggcgccacggaaaaacgctcaat…	MKFWGKTTQDAIRSGLEELHKTKAQVEVKVISEGRKGFLGFGKKPAEVELVVKEETTHKNAGRPHAKKVAVAKQKVEDWEKYLHELGYYLADVTQKMGIKTTIDVVVEKRVVTYNFETKQEGSLIGRHGKTLNALQLLAQDFLDKKSKRKVQVILDVADYRARRKETLQFLARKVARDAIQQAQRQRLDPMPSFERKIIHAALARNTEVKTYSSGNEPRRFVVVEPAYAKNTGKN	RNA-binding protein Jag
NODE_110_length_4635_cov_127.398522	fig|1578.617.peg.92	2996	3466	+	Organic hydroperoxide resistance transcriptional regulator		atgtttgagcataaccccaaccatttagaagatgaattgtgcttttcgatctataccgcacaacgcttttataaccgtttctatactgaagccttgaagaagtataatttgacctatgcgcaatacatcacgttattagttttatgggaaagtaaagaaaagatgattattcgtgatctaggtctacgtttgaaacttgataccgggacattgacgcctttactaaagcgcatggaaaaagaaggctgggtaactcgcacgaagacaaaggctgatggacgcaaggtctatatcactttgactgataaagctcttgagttggaagaccagatcaaggaccgtgtcacgggttgctttggttccgtcgatatgtccagtgacgagtataaaaatgctgtc…	MFEHNPNHLEDELCFSIYTAQRFYNRFYTEALKKYNLTYAQYITLLVLWESKEKMIIRDLGLRLKLDTGTLTPLLKRMEKEGWVTRTKTKADGRKVYITLTDKALELEDQIKDRVTGCFGSVDMSSDEYKNAVKFIQDIAKKLEDNNKLLVEKTKF	Organic hydroperoxide resistance transcriptional regulator
NODE_110_length_4635_cov_127.398522	fig|1578.617.peg.93	3571	4311	+	hypothetical protein		gtgaaaaaagcaaagctaaatgatttagctgagttgactagtgaggaatggacattttcacgtgaaggggcaacaaaaaatgggatcttagtgaattatttggctcatacttatgaacgcttagaatatgaaaataaaatttttgttgatgaaaaaaacgggagagcgatttttaatacgggactttttgataatttttatgaaccgctctacgcatatttagaattgaataaaagggagaatacgcaaaagtggtatactgttgggtttaaatcagcatatgaactggcacgtcgaggggtcgacaatactttacttccagagcgggcaaactattttgaagatccatcgctgttgatttttgatgctaattgtcctataaatattcaatttgggcat…	MKKAKLNDLAELTSEEWTFSREGATKNGILVNYLAHTYERLEYENKIFVDEKNGRAIFNTGLFDNFYEPLYAYLELNKRENTQKWYTVGFKSAYELARRGVDNTLLPERANYFEDPSLLIFDANCPINIQFGHILNDPNNIKRLPKKIKDATNRTTIFRGALDLMVKSVTANYKLAVPQYYKGNIQLLLPVCLLEPMKADVALVVTKSNDGKYYQGHTCLTLDMAYNNARLIARPNSDWLNVREGK	hypothetical protein
NODE_111_length_4626_cov_111.273895	fig|1578.617.peg.94	103	720	+	hypothetical protein		atgttaataataagccttactctgttaccatctttgctaagaatggatcctgttgaccctaactattttttattgacccaattttctttttgggacatggcaatgatttacttagtaactactacagtgattctgcctttgcatgagtatgcccattttgcggtttattataaatatttaaaaccttctaaagtcacttttggattctctttaagatatttttctatgccagttttcttcataaaagttcctttttataaagtcttgaaaggaaaaaaacgtaatgagctagtcctagcaggtgtgaaatttcaagttgctatttggttcttgttaactttgttcacagtgatgtatccttctaaatttttacttgggctaattattgttaacctagga…	MLIISLTLLPSLLRMDPVDPNYFLLTQFSFWDMAMIYLVTTTVILPLHEYAHFAVYYKYLKPSKVTFGFSLRYFSMPVFFIKVPFYKVLKGKKRNELVLAGVKFQVAIWFLLTLFTVMYPSKFLLGLIIVNLGLIITNLLPFLKLDGYWYLSNLLGVEDYMAYFKAMFLKKKKFRLDVCLLGLINFGMIILSIISFLADIMRYFV	hypothetical protein
NODE_111_length_4626_cov_111.273895	fig|1578.617.peg.95	736	1962	+	Aminotransferase		atgaaagattacgctttattaaatggcgcttacagtaatgtgactatgtatgattttgagcctgttcgggcagatggaacatatttatttgataagcaaaatagaaaatatctagatttaagaagtggtttgtggaatacatctctaggttacagtacttgtctctatagtgaaatttctaaacaatttaggcaatttctggagaaaaaaattccatatgttgatatacattcattccaacatgatatttataatgaagttgctcaaaagattttgcagctgacgggtcaaagttttagaagagttttgtttacgaattcgggttctgaaaatactgaattggctctgaaaattgccgattatatcagcaaaaagggaagtcataatcgaatattggca…	MKDYALLNGAYSNVTMYDFEPVRADGTYLFDKQNRKYLDLRSGLWNTSLGYSTCLYSEISKQFRQFLEKKIPYVDIHSFQHDIYNEVAQKILQLTGQSFRRVLFTNSGSENTELALKIADYISKKGSHNRILAFKDSYHGTFFGGVSVSGIDQDINSSFYPKYGDVTFVDYPTSIEQEKRILDYVKRIAVSYDVMMIEPILASAGVYFASVDFFNRLLQILKENQVLVVFDEVATGFFKTGTPFYFQQLSEIPDILCLSKAINNGTTPFGCVCVNGMVDERLQKSTRIKEHFSTQNGNLLGFASAKVILDHYINNKDAIIDKVNKISKLITSSLDGKGIEYRNIGIMTAVKTGNDYSLQVMKSLEKLGILTYIYINKDEEGLSLMPQFIIDLNSLRKAM…	Aminotransferase
NODE_111_length_4626_cov_111.273895	fig|1578.617.peg.96	2095	2223	+	hypothetical protein		atggaattagcagataactatagcaagaaatttacatttgaagaagtagatgttaatgaattatacgtagatggatggcagattaaacttggtattgctatcggtgtagctgctttggccttaacataa	MELADNYSKKFTFEEVDVNELYVDGWQIKLGIAIGVAALALT	hypothetical protein
NODE_111_length_4626_cov_111.273895	fig|1578.617.peg.97	2415	2654	+	hypothetical protein		ttgaaaaatttcaatagtaatgtgagaaaattgcagggtgcttttttgattatcactatgctaggaacacttgcaattatactttcagaaagtagaccattaatttcaacacttctgattgttgttattattaccatagcatttataagtatgttatgtcttcaacaattaagtaatggcaaaaaagatggaaagaaaagtggattgcagaaaggaaaaaataatgaatttacaaaataa	MKNFNSNVRKLQGAFLIITMLGTLAIILSESRPLISTLLIVVIITIAFISMLCLQQLSNGKKDGKKSGLQKGKNNEFTK	hypothetical protein
NODE_111_length_4626_cov_111.273895	fig|1578.617.peg.98	2638	2775	+	hypothetical protein		atgaatttacaaaataaattagtttttgaagaaatcgaagcttcagaactgaatggcaacggtagagactttattgaaggtttcggtgtcggtgtcacagttgtggccggaattgctggcattgtagccttaacctaa	MNLQNKLVFEEIEASELNGNGRDFIEGFGVGVTVVAGIAGIVALT	hypothetical protein
NODE_111_length_4626_cov_111.273895	fig|1578.617.peg.99	2789	2917	+	hypothetical protein		atgaaattaacagataactatagtaaagattttacatttgaagaagtagatactaatgaattatatgtagatggatggcatattgggcttggtattgctaccgtcgtagctattgtagctctaacataa	MKLTDNYSKDFTFEEVDTNELYVDGWHIGLGIATVVAIVALT	hypothetical protein
NODE_111_length_4626_cov_111.273895	fig|1578.617.peg.100	2930	3169	+	hypothetical protein		gtgaaaaatttcaatagtaatgtagggaaattgcagagtgcttttttgactatcactttactagggacacttgcaattgtactttcagaaagtaggccattaatttcaacacttctgattgttgttactattaccgtagcatttgtaaatatgttacgtcttcaacaattaagtaatgataaaaaatatggagagaaaagtgaattgcagaaaggaaaaaataatgagtttacaaaataa	MKNFNSNVGKLQSAFLTITLLGTLAIVLSESRPLISTLLIVVTITVAFVNMLRLQQLSNDKKYGEKSELQKGKNNEFTK	hypothetical protein
NODE_111_length_4626_cov_111.273895	fig|1578.617.peg.101	3153	3287	+	hypothetical protein		atgagtttacaaaataatttagtttttgaagaaattgaaactctagaactgaatggtaatggcagagattttattacaggttttggtgtcggtatcggcgttgtagctgggatggctggcattgtattaacttaa	MSLQNNLVFEEIETLELNGNGRDFITGFGVGIGVVAGMAGIVLT	hypothetical protein
NODE_111_length_4626_cov_111.273895	fig|1578.617.peg.102	3301	3447	+	hypothetical protein		atggaattaacagataagagcattaatgagtttgcatttgaagaagtagatactgatgagttatatggagatggctggttcattggtggtgctgctgctggtgctgtagttggaggagccatttgggccggtgtagctttgacctaa	MELTDKSINEFAFEEVDTDELYGDGWFIGGAAAGAVVGGAIWAGVALT	hypothetical protein
NODE_111_length_4626_cov_111.273895	fig|1578.617.peg.103	3784	3515	-	hypothetical protein		ttgaagaatacagacagcaaggtaattttaatgctaggacgaatcggttcggtgctatctgttatcatgtatgtatcctatattccacagatcatgaataacttaaatggtaattacggcagtccgatccagccactggtagccgggatcaactgcacgatctgggtgatctatagctactttaaatcacaacgcgactggcctatttttatcgccaacttaccgggtgtctttttaggcttcattaccttttacactagtttacattaa	MKNTDSKVILMLGRIGSVLSVIMYVSYIPQIMNNLNGNYGSPIQPLVAGINCTIWVIYSYFKSQRDWPIFIANLPGVFLGFITFYTSLH	hypothetical protein
NODE_111_length_4626_cov_111.273895	fig|1578.617.peg.104	4464	3865	-	Nitroreductase family protein		atgacaaatccagtaaatcaagaactcaagcaacgtcgctcgatctatgccttgggcaaaaatgtctcccaaacgccagctcagatcagtgaaacgatcaaagaagcgatccgccaatccccaacggctttcaactcccaaacagtccgcgctgttatcacttttggtgaaaattccgatcgtgtttgggatatcgttgaagctgaattgaaaaaagttactccagctgatcgttttcctgcgactcaagaaaagatcgcctcatttagagcaggttttggtacgatcttatacttcaccgaaacccagacggtgcacaaattagaagcagatttcccactctacgctgctaactttgccaactgggctgaacaaggacttggcggggctcaacaagcg…	MTNPVNQELKQRRSIYALGKNVSQTPAQISETIKEAIRQSPTAFNSQTVRAVITFGENSDRVWDIVEAELKKVTPADRFPATQEKIASFRAGFGTILYFTETQTVHKLEADFPLYAANFANWAEQGLGGAQQAVWTALAAENIGASLQHYNPLIDEKIKEAFDIPESWELRAQMPFGSIEAPAGEKEFLPDDVRFKIFE	Nitroreductase family protein
NODE_112_length_4585_cov_132.724956	fig|1578.617.peg.105	27	1622	+	PTS system, maltose-specific IIC component / PTS system, maltose-specific IIB component (EC 2.7.1.208)	2.7.1.208	atgatggagaagatccagcgctttgggggcgcaatgtttacaccagtcttacttttctcgtttgccgggatcatggtctcgatagcgatcgtagcgactaatccggtcttagttggtgatctagctaaagaaggcacgatctggtataacttttggaagatcgttgaaaatggttcttggaccgtttttaacaacatggagctcttgtttgtgatcggtctaccgatcgggttagctaaaacagctaatgcgcgggcggtaatggaagccgtagtcacatatttgacctttaattatttcgtcagcacaatgttgcaattatttggctcaagttttggtgttaatttcaaacaagcagctggtggtgaaagtggcttaaagctgatcgccgggatcaag…	MMEKIQRFGGAMFTPVLLFSFAGIMVSIAIVATNPVLVGDLAKEGTIWYNFWKIVENGSWTVFNNMELLFVIGLPIGLAKTANARAVMEAVVTYLTFNYFVSTMLQLFGSSFGVNFKQAAGGESGLKLIAGIKTLDTGIIGAIFISAIVVYLHNRYFEKKLPDFLGIFQGSSYVVVLGFFAMLPIALLTCYIWPKIQFGISSLQAILATSGVVGVWIYTFLERILIPTGLHHFVYTPFVFGPAVVEGGITQYWFAHLNEFSRSTQPLKTLFPEGGFALHGNSKVFGAPGIALAFYFTARPENRKKVLSMLIPITLTAVLSGITEPLEFTFLFLSPPLFAVHAVLAATLAATLYTFGVVGDMGGGLIDLLTRNWIPVFSNHSGTVLIHIVIGLCFTFIWF…	PTS system, maltose-specific IIC component / PTS system, maltose-specific IIB component
NODE_112_length_4585_cov_132.724956	fig|1578.617.peg.106	1637	2977	+	Maltose-6'-phosphate glucosidase (EC 3.2.1.122)	3.2.1.122	atggataagaagttttcagttgtgattgcagggggtgggagtacctttactccggggatcgtattgatgttactggagaatttagataagtttccgatccgtcagatcaagttttacgataaccttgaagagcgtcaaaaagtgatcgcagatgcctgtgagatcattttaaaagaaaaggcaccagagatcgactttgttgcaacaactgatccaaagacggcttttagtgatgtagattttgtcatggctcatattcgtgttggattatatgcgatgcgtgaaaaagatgaaaagatcccacttaaatatggtgttatcgggcaagagacctgtggaccaggggggatcgcttacgggatgcgttcgatcggaggcgtcttagagttgatcgactat…	MDKKFSVVIAGGGSTFTPGIVLMLLENLDKFPIRQIKFYDNLEERQKVIADACEIILKEKAPEIDFVATTDPKTAFSDVDFVMAHIRVGLYAMREKDEKIPLKYGVIGQETCGPGGIAYGMRSIGGVLELIDYMEKYSPDAWMLNYSNPAAIVAEATRKLRPNSKIINICDMPVGIEERMAHAIGLKSRKEMEVRYYGLNHFGWWTDIRDHAGNDLMPQIKEHVAKYGYSLKEELGEHESQHTDPSWMHTFAKAREVYAVDPDTLPNTYLKYYLYSQDEVEHADPEYTRANEVMNGREKHVFGECKKIVQAKTAKDTSLEVDEHASYIVDLARAIAYNTHERMLLIVENNGALSNFEPTAMVEVPCIVGKNGPEPLVQGLIPRFQKGLMEQQVAVEKLV…	Maltose-6'-phosphate glucosidase
NODE_112_length_4585_cov_132.724956	fig|1578.617.peg.107	3049	3669	+	hypothetical protein		atgacactggaaggattgatcacaaaacatcaaaaggttttaggggaccttgataagaccatcttacgttatgtactcgataacaggccaaagatacaacagataagtattactgaattagcaactgccacatatacctctaaatcgacagttttgcgcctagtcaggaaattaggctttgctggtttttcagaattcaaatactttttaaaaacgagtaccaaagaggctgagccaaccacagagctgtttgctgatctacaggtctcagatattattaaaacgatcaagggcttggagcatgttgaatgggacgatctgacgaaacgactcaaggaggcccaaacgatctattgctatggcacaggcttttcgcaacggcggatcttagatgaattt…	MTLEGLITKHQKVLGDLDKTILRYVLDNRPKIQQISITELATATYTSKSTVLRLVRKLGFAGFSEFKYFLKTSTKEAEPTTELFADLQVSDIIKTIKGLEHVEWDDLTKRLKEAQTIYCYGTGFSQRRILDEFAKNLLQLGKRAITIPNKTELDMAMEMITPQDVVLLASLSGETENIKENIFMWTLKNVPLVSVTQAGENTFASH	hypothetical protein
NODE_112_length_4585_cov_132.724956	fig|1578.617.peg.108	3679	3804	+	hypothetical protein		ttgcactatcatgtgacaccattttccgttatcaaagaaaaaaaagtcgagtcattagtcacattatcagttgtcgttgattatctttttcgaaagttgaccgaaaaaatgagtaaagataggtga	MHYHVTPFSVIKEKKVESLVTLSVVVDYLFRKLTEKMSKDR	hypothetical protein
NODE_112_length_4585_cov_132.724956	fig|1578.617.peg.109	3810	4253	+	hypothetical protein		atgttaaaacaagtactggcaagaccagctgtatacaagaagatcttattaggctactggatcggttcaagtgtgatcttatttggatatctatctttggtcgcgcttgaccttggcaaaagtttgccagcgactttacagacgatgcctagcttagccttagtaacgatcattgcaggcctcaacttattattagcagcagccttatggaagatccaagcgacggataggccattgtttttaagtctagctttggtacaacaactcttgagtttaaactttgtgggagcattattgatctatttttaccaacgtttcagtcaacagaagtttctccaaaagccaacaacagatcaaggtgcgctactactttcctttacgctggtcatattgctgaca…	MLKQVLARPAVYKKILLGYWIGSSVILFGYLSLVALDLGKSLPATLQTMPSLALVTIIAGLNLLLAAALWKIQATDRPLFLSLALVQQLLSLNFVGALLIYFYQRFSQQKFLQKPTTDQGALLLSFTLVILLTLFVLLIRLRLEFIN	hypothetical protein
NODE_113_length_4466_cov_71.068577	fig|1578.617.peg.110	1	642	+	Type I restriction-modification system, specificity subunit S		ccacaagatccaaacgacgaaccagcgtctgtgttacttgaaaaaatcagagctgaaaaacagagattgtacgaagaaggtaagatcaaaaagaaagatttagttgaaacagagctcgtaaaagatggtgataacgcctattatcagaacttgccgaaaggatggggtaaaacactctttggtaatattgtctacttgctgtctggacgtgatttatcagtagctaagtattctgattctgtacaaaaagggataccatatattacaggagctagtaatttttgtgatggaatcattacaacatcaagatttactgaatttccaacagttatatctgaaaaaaaagatattttaataacagttaaaggtacagtgggcgagcttgcagttaatccatat…	PQDPNDEPASVLLEKIRAEKQRLYEEGKIKKKDLVETELVKDGDNAYYQNLPKGWGKTLFGNIVYLLSGRDLSVAKYSDSVQKGIPYITGASNFCDGIITTSRFTEFPTVISEKKDILITVKGTVGELAVNPYYKAHIARQIMAIRPYLVNNEFLKIYLETKIDNMKLQSQSMIPGISREVLLKLLIALPPKTEQLRITNLIKKLFQEFEEIT	Type I restriction-modification system, specificity subunit S
NODE_113_length_4466_cov_71.068577	fig|1578.617.repeat.2	1	144	+	repeat region		ccacaagatccaaacgacgaaccagcgtctgtgttacttgaaaaaatcagagctgaaaaacagagattgtacgaagaaggtaagatcaaaaagaaagatttagttgaaacagagctcgtaaaagatggtgataacgcctattat		repeat region
NODE_113_length_4466_cov_71.068577	fig|1578.617.peg.111	1132	605	-	Type I restriction-modification system, specificity subunit S		ttgcctgatagttgggaaatagtaccactaaaaaacatcgttaactataggatcggaaaaacaccaaatacgaaaaacaaaaactactggactaatcacgaaggctttccttggatttcaattgctgatatgggaaaagataagtatatcggaagaacaacccgaaaaataacaaataaagcagtagaggaagtatttaagggaattgtttctccaaaaggtactcttatcatgagttttaaattgagcataggaaaaacaaatttgttaggcaaaaattctgtgcataatgaagcaataatatctatttttccttactgggataacaataatgtgcttagaaattatttatatcttgtccttccgataataagtaattcaggtgaaactatatctgca…	MPDSWEIVPLKNIVNYRIGKTPNTKNKNYWTNHEGFPWISIADMGKDKYIGRTTRKITNKAVEEVFKGIVSPKGTLIMSFKLSIGKTNLLGKNSVHNEAIISIFPYWDNNNVLRNYLYLVLPIISNSGETISAIKGKTLNSKKIDVLPIPLPTIREQQEINTKVMLFLRILEIIS	Type I restriction-modification system, specificity subunit S
NODE_113_length_4466_cov_71.068577	fig|1578.617.peg.112	1273	2271	+	hypothetical protein		ttggaaaaaggaaaatcgattgatgctttgatgagacatattcgaaatgatcacaatgtttcaataaatggtggaaagaataaaaaatcattaatgaatatgggatactatcatggatataagagataccgttttataaaatctaccaaaaatatacagaattttgatgatttttcacaaatcacggctatctattcttttgactttgagataaaacgaattttttatccaatgattatcctagtagaaactagtatgaagaatcgaacaattgatgctgtagttacccgacaaaattcagatatagagtctatttataagacgaaactaactgattatttagattatgacagaaatagtaatgataagaaggagattagaaagtttagagatggcata…	MEKGKSIDALMRHIRNDHNVSINGGKNKKSLMNMGYYHGYKRYRFIKSTKNIQNFDDFSQITAIYSFDFEIKRIFYPMIILVETSMKNRTIDAVVTRQNSDIESIYKTKLTDYLDYDRNSNDKKEIRKFRDGIKGRLDFRSVMDQTIGYNYGKNDALSHFVHNSKPIPLWVFFELITFGQFGHFISRLSKEWRLKVSEANGLQSASFNQNGRMLQNIVFTLTDLRNATMHNSAIFDANFNHDGIARGLKQFLMLETNIEDITFDKIIDYLILLIFVLKKYGYSKTEIKAYVRQFESAKERLFKSIPRSTYGSLLGMDSNKKIEGIYSFISRT	hypothetical protein
NODE_113_length_4466_cov_71.068577	fig|1578.617.peg.113	3231	2422	-	Integrase/recombinase (XerC/CodV family)		atggaaaattcagtaaaagatttcgaattgcacttaaaacaacagggactgtcaacaaatagcattgattcatacttatatgctgtaaagtattttcttgaaaattacgatttggagcttgaaggggttctggaatataaaggatatttgttagaacgctttaagcctaaaacagtaaatttacgtattcaagggcttaataagtttttgaaattttcaggtaatgatgatctttgtttgaaagcaatcaaaattcagcaaaaaaattatttagaggatgttatcagttatgccgattatctgttcttaaagcggaagttaaaaaaagatgggaatatgaagtggtacttcgttgtttggttcttaggtgcaacaggtgctcgagtgagtgaactagtc…	MENSVKDFELHLKQQGLSTNSIDSYLYAVKYFLENYDLELEGVLEYKGYLLERFKPKTVNLRIQGLNKFLKFSGNDDLCLKAIKIQQKNYLEDVISYADYLFLKRKLKKDGNMKWYFVVWFLGATGARVSELVKIKTEHIDIGYFDIYSKGGKIRRLYIPKRLKNETSIWIENENRTSGYLFLNKYGEQITPRGIAQQLKNYANKYGLDTKIVYPHSFRHMYAKRFLEKFNDISLLADLMGHESIETTRIYLRRTSTEQQNIVNKIVTW	Integrase/recombinase XerC/CodV family
NODE_113_length_4466_cov_71.068577	fig|1578.617.peg.114	3281	3856	+	Type I restriction-modification system, specificity subunit S (EC 3.1.21.3)	3.1.21.3	atgtacgcaaaaaacgccgttctttacagaaacggcggtaatttttataatcattgttattcttcagactcctattatgggaacttgccgaagtcttggctactgaccaccgtggagaaaagttgcatattattatctgaaagggatttatcatcggataaatatgacaataactcacaaaattctacaccatatatcacaggagcaagtaattttcataatggacaaattaccactgatgggtatacaaaatttcctcaggttatcgcacaaaaaaatgatttactaatcactgtaaaagggacgattggtgaattagccattttaaaacttgagaaagctcatattgcaagacaaattatggcaatacatccattagccattgatacacaatacgta…	MYAKNAVLYRNGGNFYNHCYSSDSYYGNLPKSWLLTTVEKSCILLSERDLSSDKYDNNSQNSTPYITGASNFHNGQITTDGYTKFPQVIAQKNDLLITVKGTIGELAILKLEKAHIARQIMAIHPLAIDTQYVFLVLKNSIEQLKQQAQSMIPGISRNVLLKSEIPLPPISEQRQICQTISLIDSQLQKLS	Type I restriction-modification system, specificity subunit S
NODE_113_length_4466_cov_71.068577	fig|1578.617.peg.115	4466	3816	-	Type I restriction-modification system, specificity subunit S		ccacaagatccaaacgacgaaccagcgtctgtgctacttgaaaaaattagggctgaaaaacagagattgtatgaagaaggtaagatcaaaaagaaagatctagttgaaacagagattgtaaaagatggtgataacgcctattatgggaagttaccaaaaacatggataaaatccaagttattctccgttgctaatgtaattatgggacaatctcctaaagggaataatgtaacaagcgaatttagcttgaatgcggttgaatttcatcaagggaaaagtgactttggagaaaaattcttaaatccctccggcaagtacaccagccagataacaaaagaaatagaaatcccttcaatcgttatgtcagttcgagccccagttggagatgtaaatttaact…	PQDPNDEPASVLLEKIRAEKQRLYEEGKIKKKDLVETEIVKDGDNAYYGKLPKTWIKSKLFSVANVIMGQSPKGNNVTSEFSLNAVEFHQGKSDFGEKFLNPSGKYTSQITKEIEIPSIVMSVRAPVGDVNLTRKTIVIGRGLAAIQPYGYSLEYLYHFLLTQKSILEQQATGTTFKAIGGEVLRNLPIALPAEKEQIRIVNLINSVFEVESQLMK	Type I restriction-modification system, specificity subunit S
NODE_113_length_4466_cov_71.068577	fig|1578.617.repeat.3	4323	4466	+	repeat region		ataataggcgttatcaccatcttttacaatctctgtttcaactagatctttctttttgatcttaccttcttcatacaatctctgtttttcagccctaattttttcaagtagcacagacgctggttcgtcgtttggatcttgtgg		repeat region
NODE_114_length_4344_cov_76.369752	fig|1578.617.peg.116	793	2	-	Fic domain protein, KPN_03553 type		gtgaaaccaccatttacattgactaacacgatgcttcatcaggtgatcgagatctcaagggtactggggatcttagaatttagcgttaaaagtgatttgaagttacgaaaagaaaatcggatcaagtcgatccattcgtcactggcgatcgaaaataattcactcactgaaaaacaagttacagatattattgatggtaaacgtgtcttaggggaccctaaagagatacgagaagtcaaaaatgcgtatgatgcttacgaagaaattttgacattagatccgtatcggcaaaaagattttttaaaagcccatcgccttttgactgctgggatcgtaaatgaagctggaaaatatcgcagtcgagatattgggatatttgatgagataggaaatgttgtg…	MKPPFTLTNTMLHQVIEISRVLGILEFSVKSDLKLRKENRIKSIHSSLAIENNSLTEKQVTDIIDGKRVLGDPKEIREVKNAYDAYEEILTLDPYRQKDFLKAHRLLTAGIVNEAGKYRSRDIGIFDEIGNVVHMGARPQYLQALMDDLFAWGKNDNTPELIKSCVFHYEIETIHPFADGNGRMGRLWQTVILANWNPIFAWIPIETLIYENQRDYYKVLEQVDQETNSNRFIEFMLAIILKTLKSYLTVTSNLEQKIDIPEGL	Fic domain protein, KPN_03553 type
NODE_114_length_4344_cov_76.369752	fig|1578.617.peg.117	1941	988	-	Outer surface protein of unknown function, cellobiose operon		ttgagatctagaaaagaagaagtattagatatattaactaaaagccataataaattcactgcaaaagaattggcagataaattacagatcgatcgggctaatgtcagtcgttatctcaatgagttgaccaaattagggactgatgggatcagattagacgaaggctttgatggcagtaaagaagccatgttgagttataatcccgaaggtctagcgatcgagttgaatatgagcaacaatgtagtgtatttggaaaatatcttgtcatatgaagctaatgaaccctttatttatgggtgtcataacttctatccgcaagaaggttcagccttgccgtatgatttctttgtcagttgcagtcaacgtttcaagcgccatgggatcaaaacagcagctttt…	MRSRKEEVLDILTKSHNKFTAKELADKLQIDRANVSRYLNELTKLGTDGIRLDEGFDGSKEAMLSYNPEGLAIELNMSNNVVYLENILSYEANEPFIYGCHNFYPQEGSALPYDFFVSCSQRFKRHGIKTAAFVTSQSAKGGPWDVNDGLPTLEMHRHLPLDLKARHMFATGLIDVVIIGNAYASDEELRSLAAIDRYKLSLGIVFVPQATKLEKKIVAYPKHFRRGDITASAIRSTMVRVKYANEPEPAHDNTKEFQRGDVVIGNDDFGKYKNELQIVLEPHSDPRKNLVGKIPPEELMLLDFIKPWTKFKFVPRN	Outer surface protein of unknown function, cellobiose operon
NODE_114_length_4344_cov_76.369752	fig|1578.617.peg.118	4059	2365	-	Oleate hydratase (EC 4.2.1.53)	4.2.1.53	atgttaaagaataaagcagtaatgatcggtgctggtatcgctaatatggctgccgccgtttatttgatccaagaaggtcattggcgtggcgaagacatcactttttatgcccttgatctacatggagcaaatgatggtgctgccgcttcagttgcagctgaacagtattggaacaagaaccatccaatggaaaacaccaagggctacgttgcacgtggtgggcggatgttgaattatcggacttatgttgatctgatggatctattagatcggatcccttcagtaactgagccaggtatgacagcggctgaagatacgcgtgattttgatagcaaacaccggacatttgataaagcacggctgatgcaaggtggtaaagggatcattgatggtcacaaa…	MLKNKAVMIGAGIANMAAAVYLIQEGHWRGEDITFYALDLHGANDGAAASVAAEQYWNKNHPMENTKGYVARGGRMLNYRTYVDLMDLLDRIPSVTEPGMTAAEDTRDFDSKHRTFDKARLMQGGKGIIDGHKLGLNNLDRMLLTRLIMLPDDKEEELDNVSIAEYFKDDPHMFQTNFWYMWETTFAFRIESSAQELRRYMHQMIYEFTQIEHLVGVNRTRYNQFESIMLPLIKYLEGQGCKFVMNSRVEAFDFKETSMQDEITVTGLEILDTATNEKKHVAIASDTAVFFTNGSITDSASLGDFNTPAPENMDYGAASSLWKQATQHFYNLGNPDKFFADRNASEWVSFTLTTKDHLLLNEITRITTQLPGNALNSFLSTEPITPLGHEDVNMSIVVH…	Oleate hydratase
NODE_114_length_4344_cov_76.369752	fig|1578.617.peg.119	4344	4189	-	hypothetical protein		gtctttagtaatgaattggacctaccgatcgtgatcttaggggtctcttatgccggaagtcaggtgcacagccccaatgagcatattcgactccaggattttggggatggaactcagcttttaggtgatattttggtggaatttggtaaaaattaa	VFSNELDLPIVILGVSYAGSQVHSPNEHIRLQDFGDGTQLLGDILVEFGKN	hypothetical protein
NODE_115_length_4311_cov_107.337775	fig|1578.617.peg.120	65	340	+	hypothetical protein		gtggctgataagaaaaaatatcagactgatggcaaaaaattattagaggaagcaactgtagtcgtaaatgggcaaaaaagagaagtagtaaatctcctagatggaagtgcaactttctttgatggtgaagaaaaggtcgtaaatattgcctttaacattgaccaagatttaaaagaagcatatcttgtctataaagactgggatagttctataaagaatagtatcccgatattcattaaaatagttccaagtgagttggaggatatcaaaaagtga	MADKKKYQTDGKKLLEEATVVVNGQKREVVNLLDGSATFFDGEEKVVNIAFNIDQDLKEAYLVYKDWDSSIKNSIPIFIKIVPSELEDIKK	hypothetical protein
NODE_115_length_4311_cov_107.337775	fig|1578.617.peg.121	337	873	+	hypothetical protein		gtgaagcggatatacatcattttgatttctttgagtatggctgttatattttcgttgctcaataccacggtcttagctgatagtccaactgaagtcaaggtggataaagtgatcgaacatggcgttgataaatatgtcattgaaagttatcaaatttacaatgacctacctgtaagttataaagatgatacaagatcgcatactaaatatgctcgctaccttgtgctaactatcgagtggacacctggcgttgatcaagaaaaaatgttgttagtattagaaaacggtgcaagttggtctgaaaatataaatgatagccctaggatggagcaaactgcactaaataaattacacctaactgttctcggtaagaccggtgagaagaaatttaaaaaggga…	MKRIYIILISLSMAVIFSLLNTTVLADSPTEVKVDKVIEHGVDKYVIESYQIYNDLPVSYKDDTRSHTKYARYLVLTIEWTPGVDQEKMLLVLENGASWSENINDSPRMEQTALNKLHLTVLGKTGEKKFKKGKVYRMRMGYVIRPNSGVKYLVHDGKKMKRFVLLKPKTKDGILVNK	hypothetical protein
NODE_115_length_4311_cov_107.337775	fig|1578.617.peg.122	870	1682	+	hypothetical protein		gtgagtgtgttaggtgaaaatatgaaaacattaaagaaaatatttgattttgacaatatgtactttattttaggtagttgtatttttattagtcaatttctagtgtctggtcggtttctactacctatcttgttagtgtttcttggaggaataagttttttttgcagtaagcaagtcattttttcgaccgcttttgttgctatcttggccacttttcttatagaaaattttggaacgctaggggtctttagtagtatcgtgatcgcgctagtacttggagctgtagtttggtatatatcaactaaagaaaaagaaaagatcttgcaaaagtattatcgtgagatcgaaaaaatgtacagtaaagaactggtttttaatgaaaatattttgaaaaattca…	MSVLGENMKTLKKIFDFDNMYFILGSCIFISQFLVSGRFLLPILLVFLGGISFFCSKQVIFSTAFVAILATFLIENFGTLGVFSSIVIALVLGAVVWYISTKEKEKILQKYYREIEKMYSKELVFNENILKNSQLSEAELKFFKQDIEKHYKTYKIISEYSYDEKRFPEYAELLLLVKTIFREITETPRNMLEAKDFLYVHLPELKQASVRVSKLSRKSRLTKKDEAQLAMIERELEYLQLAFRQDYLLVTQDERQRLRKIKRDLEKDNE	hypothetical protein
NODE_115_length_4311_cov_107.337775	fig|1578.617.peg.123	1726	2829	+	hypothetical protein		atgaactttgggatatatgtggagattttgatagagtgttttgtactggcattcatattattaccagcaagaatcagcgataatggaccaactgttcttatgttggaattctttttagcggtcttagtggtcgtcaacgttatcggctcagagttgcgcttgcggtttacccaagttgaagggacgagcgttttagggatcgataaaagagacaaagggatctgggtaagaactccaaaagatcaaaatgcgatctatatccccttttcattactcatttctttcaggaaaaaagacagtatgctagtcttgaaatatcacgctggctttaaacaagatagtaatggggaaataaaagtcgtggtaggtgataccatcaacttaaggctaagcgagtta…	MNFGIYVEILIECFVLAFILLPARISDNGPTVLMLEFFLAVLVVVNVIGSELRLRFTQVEGTSVLGIDKRDKGIWVRTPKDQNAIYIPFSLLISFRKKDSMLVLKYHAGFKQDSNGEIKVVVGDTINLRLSELNGQQFKVFVKEYNKLVGAKKAIDYRFKISARPQKTKQQVIGAFILFPLMILLVVFPNDFSDTGLDTTSKQAKKADEETTTQDKLQYGKVYSVEGYRFKINQGYYAKDTDGKNVVIFNIDIALSAESYEQHDVLDKFASKTLQLSDTADKVKEYNISRPNYLEIMQDKQAYPVVNLLTNKVSYGELADTTWKNMNLAYVLPEEMTGTWKLTYSEYDDRFINHQLIVKRSELEEIK	hypothetical protein
NODE_115_length_4311_cov_107.337775	fig|1578.617.peg.124	2826	3392	+	hypothetical protein		atgaaaaagttatatagatatttgttgctgatcggagtagtagctttgtacatgataccagcaacagtcaaagttgacgcccaaacggtatctattgataaaacgcttgagcgaaaagacgataagactaggtattatgtgaaaaattatgagatcattgattcaccaaaaagaaatagtaaggtcaccaaaaaacaagaacgtgaggataagttaacacagtatctattgcttgaggtgacgatcgataatcctaaaaaaagctacattttttttgacgatgttatccaagtgtcttctgggggaaatattgttcctagtataaataatactgtattgaactacgaaaagatcccggctttggaaaaacatgggataaaaaaagctgaatttgatggg…	MKKLYRYLLLIGVVALYMIPATVKVDAQTVSIDKTLERKDDKTRYYVKNYEIIDSPKRNSKVTKKQEREDKLTQYLLLEVTIDNPKKSYIFFDDVIQVSSGGNIVPSINNTVLNYEKIPALEKHGIKKAEFDGKKRKIENVYMYPIKKYNETKIMLKDKNSWTSLQVTTPEPAKNGITAQAYPLEVGE	hypothetical protein
NODE_115_length_4311_cov_107.337775	fig|1578.617.peg.125	3394	4185	+	hypothetical protein		atgatgagagcgataactaagatatcaagttatgtcactttaggtgaaattagaaaaaatctacttatattggcactggtattactatttttagaatattttctcccaacagggacgctgggctttcttttattgcttgcattgggaacagaaagatttttagcgcctaagttagccttgttcgtcattgccccagcgatctggctaagctattttttgttgctatatgttgttgagccaaatgaacaaataaatatttatagtatttattatttgctggcctattatatagttctagtagtgggatattggcaacttgaacgttttaaaaaaaagatccaatatgaatacgtgacggaattgaactatctgaatgatgagatgatctattttgatcaa…	MMRAITKISSYVTLGEIRKNLLILALVLLFLEYFLPTGTLGFLLLLALGTERFLAPKLALFVIAPAIWLSYFLLLYVVEPNEQINIYSIYYLLAYYIVLVVGYWQLERFKKKIQYEYVTELNYLNDEMIYFDQNKLDALHMNDSEQKFYRKLLNEKYQHYLYLKSINWRLERKVSKFSNTQVLIQQIFNELVQEPQKVLDADNFLYRLLPDYTQLVKDYLDLEENMLKTDEDAELKQIALTRIKLYNEEFSEELNRLKQFKNL	hypothetical protein
NODE_116_length_4211_cov_94.668502	fig|1578.617.peg.126	39	887	+	hypothetical protein		gtgacaaagttagatgatattttacagctatactccaccgcaaaaataagcgagcagccagagcttacgccagaaagtgtaagttttatgtgcgaaaaagggtatttgaatttaactaaagcagaactaactgcgagagaattagaattgttgcaggtcatactaggaaaaccagtcaaacactacgatccttggcaagcttttttgtgtggtcggggaaaaaggcctgttattaaaggaaaagtccgctttattttgggaaaggtcgaattcaaaaattcagaattttcgttgacgacatggaaaaaagctttgcaagagatgtttacgacggagatcttagcctgttttcagctgaaagatgatgaatttgtcttagttgaacaagtcagtgccact…	MTKLDDILQLYSTAKISEQPELTPESVSFMCEKGYLNLTKAELTARELELLQVILGKPVKHYDPWQAFLCGRGKRPVIKGKVRFILGKVEFKNSEFSLTTWKKALQEMFTTEILACFQLKDDEFVLVEQVSATSYESADFLGIAQSLDAELNTKTKFFIGDLWPAEFDLAQLFAEEQAIFKKTADKNTTVMTAAKGALDYFTHQSRKQSYLLKSYQELFFKEPQLKKIIQALYQAQGNTTLAAKKLYLHRNSLQYKLNRFAAESGLDVKQMDDLIFCYLLTL	hypothetical protein
NODE_116_length_4211_cov_94.668502	fig|1578.617.peg.127	1004	2113	+	Maltodextrin ABC transporter, ATP-binding protein MsmX		atggtcaaattggatttagatcacatttataagaagtacgataacgcagaagactattcggtaacagattttgatctacacatcaaagataaggaattcatcgtgtttgttggcccttcaggttgtggaaaatcgacgactttacggatgatcgcggggttagaagatatttctgagggcgaatttaagatcgatgaccgtgttgttaatgatgttgcaccaaaagatcgtgatattgcgatggtcttccaaaattacgcactttatccccacatgacagtctatgataacatggcttttgggcttaaattgcgtaaatattccaaagaagagataaaaaaacgtgtatcgcatgcagctgatattttagggttaacagaatatctacaacgtaaacca…	MVKLDLDHIYKKYDNAEDYSVTDFDLHIKDKEFIVFVGPSGCGKSTTLRMIAGLEDISEGEFKIDDRVVNDVAPKDRDIAMVFQNYALYPHMTVYDNMAFGLKLRKYSKEEIKKRVSHAADILGLTEYLQRKPAALSGGQRQRVALGRAIVRDAPIFLMDEPLSNLDAKLRVSMRAQIAKLHQELGTTTIYVTHDQTEAMTMADRIVIMKDGKIQQVGSPQEVYDDPANVFVGSFIGAPAMNFFNVTVKDGKVYDDAKNFEIEVPVGRLKLLKDKGFDNKKVIMGIRPEDIHTENAFLDTFPNAKVEATVTVSELLGAESQLYSKLGETEFVSKVDARDYVKPGTKMIMGFDLNKAHFFDPTTKINLNR	Maltodextrin ABC transporter, ATP-binding protein MsmX
NODE_116_length_4211_cov_94.668502	fig|1578.617.peg.128	2126	3754	+	Glucan 1,6-alpha-glucosidase (EC 3.2.1.70)	3.2.1.70	atgggaaaatggtggcaaagtgcggtgatctaccagatctatccgcgtagtttcaaagatacaaatggtgatgggatcggtgatctagccgggatcatttccaaattggattatttagaaaagttaggtgtgaccgcgctttggttatgtccagtctatcgttcacctaatgatgataatggttatgatatcagtgattatcgccagatcatggctgaatttggaacgctaggacagatggaagacttgatcaaaaaagctaagcaacgtgggataaagatcgtgatggatctagtcgtcaatcatacttcagatgagcatcaatggtttatcgaagctaaaaatgatcccaagagcaaatatcgtgattattatatttggcgtgatcctaaagccggt…	MGKWWQSAVIYQIYPRSFKDTNGDGIGDLAGIISKLDYLEKLGVTALWLCPVYRSPNDDNGYDISDYRQIMAEFGTLGQMEDLIKKAKQRGIKIVMDLVVNHTSDEHQWFIEAKNDPKSKYRDYYIWRDPKAGKEPTELKSVFGGSAWEYDEQSGQYYFHQFSRKQPDLNWENPAVRKEVYEMMNFWVAKGIGGFRMDVIDLIGKVPEKNITSNGPKLHEYLKEMHQNVLADTKLVTVGETWGATPDIAKLYSDPKQKELSMVFQFEHVQLDQFPNRPKWFTRPLSVVKLKEVITKWQVELADVGWNSLFWNNHDLPRAVSAFGDDGIYRVQSAKMLAIVLHLLKGTPYIYQGEEIGMTNLKFTDIAQIDDIESKNMYQEYKAKGYSNEELLQMISHKG…	Glucan 1,6-alpha-glucosidase
NODE_116_length_4211_cov_94.668502	fig|1578.617.peg.129	4173	3745	-	hypothetical protein		atgccgacactcccagaacaattacagcttcaaagtgacttcctagcccttctttccactttcttaaaagaatacccagccaataaagcggtcagtcaaagtaccgcttcacgtacctttgtccaagcaaaagagtgcttggaaagtacatataccaccgggatcaatatttccgctatctgtgctcagttacatctttcacgtagccatctgtacaccttgttcaaacgctatttaagccaaacaccccaacaatatttaacagatctacgcatcacacacgccaaaaaactgctgatagaaacgaccgatccgatcgattctatcagcagtcaagtaggttataaagatgcttttacattttctaaagcattcaaacgaaagaccgcttatagcccg…	MPTLPEQLQLQSDFLALLSTFLKEYPANKAVSQSTASRTFVQAKECLESTYTTGINISAICAQLHLSRSHLYTLFKRYLSQTPQQYLTDLRITHAKKLLIETTDPIDSISSQVGYKDAFTFSKAFKRKTAYSPLAYRKSYHK	hypothetical protein
NODE_117_length_4208_cov_118.474491	fig|1578.617.peg.130	3393	1	-	hypothetical protein		atgttatcaaaaaacaatacaaatctttattcagctaaattagcaccgaaacatcagaaatttgcgatcaaaaagtttacagttggggtggcatcagtccttattgggacaacatttgctgtctatactgcacctaatgttttggccgatctatcagatgcccaaagtgatccagtaacgactaaagatcaaaccaatgcgtcagcctcaaaagagcaagcatcacgaaaagatgcgacatcttcagtagataaaacaccagcagagcaagctcctgtagttaaacagcctactgagccagagcaaacttctcaaactccaagtcaagatgctagtcatgtaactgatatggcacaattaaaaactgcgctaaatgacagaaatgtagccgagatcgta…	MLSKNNTNLYSAKLAPKHQKFAIKKFTVGVASVLIGTTFAVYTAPNVLADLSDAQSDPVTTKDQTNASASKEQASRKDATSSVDKTPAEQAPVVKQPTEPEQTSQTPSQDASHVTDMAQLKTALNDRNVAEIVLDKDVTNDTDKYVNVDQAKVARKVTVWGSKVADKTTTLNLGDQSLYFYNKTEDDEHKWDLTFKNLNVMTNDPHGYGVVSFQNNGKNANVTFDNVKAGGNGVLAYAPKATVNLHDVSVTPSYAESSPTANLTADKVDLSGNVDLNAEVNNSYTAKNVEAGGQVTVKSGANVVLTATNSISNRLQNLTAGSLNVEKGAKLTVRSKTTASNVKVPSSASWSGLVDNSSAVYVTKGNAKVDGELKVEPFTKDKKSTSVVGAVVLGASGNE…	hypothetical protein
NODE_118_length_4146_cov_5.775346	fig|1578.617.peg.131	1	480	+	hypothetical protein		caatataagaagtggctgaagcaagaaaatttattattactgcaaggctggaaacgtgatggcctgactgatgaacagatcgctcataatatcgggattagacgtgagacattgtatgactggataaagaaataccctaacatatccaacgccttaaaaatgggaaaagaacaggctaattttatcattgagaatgcactgttcaaaaaagccaagaatggtcacgtcaccgcacagatattttggctcaaaaataattggcgtgataagtacaacgatagccagttatccgttgaagaaagagaattgcttaagcatcgtattaaagactctgaacttgatacaaaaatcaaagaagccaagcttaagatcttgcaaagtgagggtactaatgcagaa…	QYKKWLKQENLLLLQGWKRDGLTDEQIAHNIGIRRETLYDWIKKYPNISNALKMGKEQANFIIENALFKKAKNGHVTAQIFWLKNNWRDKYNDSQLSVEERELLKHRIKDSELDTKIKEAKLKILQSEGTNAEDHLLELIEAIEKEDDKEHGTDQGINS	hypothetical protein
NODE_118_length_4146_cov_5.775346	fig|1578.617.peg.132	452	1702	+	Phage terminase, large subunit		atggcactgaccaaggtattaacagctaaacagcgagaagtgttacatgcttatcgtactcaagaatttcgttttctgatcaattcgggttctgttcgttcaggtaagacgtatattgataattacttatttttgcttgagttggatagagtcagaaagctagcaaaacaactgggggactcaaaccctaaatatattctcgctggtgtatcgtcaggtacgatctatacgaatattatttcagagcttggcaatcaatttaggatagcacctaagactgatagatttggtcattatcatttgttaggcgttgagatcgtgccagcttacacaggttctattcgtggtatggcgtctatacgtggtatgaccagttatggtgcttacgttaatgaagcg…	MALTKVLTAKQREVLHAYRTQEFRFLINSGSVRSGKTYIDNYLFLLELDRVRKLAKQLGDSNPKYILAGVSSGTIYTNIISELGNQFRIAPKTDRFGHYHLLGVEIVPAYTGSIRGMASIRGMTSYGAYVNEASLADQSVFQEINNRCSRPGAHIICDTNPDHPEHWLKTQYIDKENDSGKTLYFNFKLEENTTLDQSYIEGLKATTPTGMFYDRSILGLWVSGQGLVYPEFDRRTMTISRQQAFDETYERFFVGVDWGFNHKTVFTVMGYRDGVYTLMEEHAASYEQIAYWVDVAKDIKERFGNIPFYCDTANPEHIYDLSQAGIRTMNANKNVLNGIEYVAGAMHNGKFRVVYDDCPQFRKEIYNYAWNEKTGDVIKKDDDCMDSMRYAMYNDYLDH…	Phage terminase, large subunit
NODE_118_length_4146_cov_5.775346	fig|1578.617.peg.133	1702	3240	+	hypothetical protein		atgttaaaagtgaatgaatttgagaatggcgtggggttaagtgataacaataagctatttccttttagcgttgaaagcaatatccattatcgggtcaactctttggatgacttgataaataacagttatgagacgctgacccatattataaaccacttcatcacaaatcaaataccacgcttagaagttttggacggttactctaaagggcgtaatgctggtatctttagtggtgatcgccgtttggacaaaaacaaagctgatcatcggatcgcacataactttgggaagctgatcgcacaattcgttgcaggatataccactagcgttccgctaaagtatgacttgcccgatgatagcaagctaaacgctaagttactagagttcaacaaagaaaac…	MLKVNEFENGVGLSDNNKLFPFSVESNIHYRVNSLDDLINNSYETLTHIINHFITNQIPRLEVLDGYSKGRNAGIFSGDRRLDKNKADHRIAHNFGKLIAQFVAGYTTSVPLKYDLPDDSKLNAKLLEFNKENDIATLDNELMYDVAKFGRAYDIQYKNDKGNKIKQANVFETFVIYDTTIERKPVAAVRIVEVGFSKDSVKTYQTILYTDANIVHFKPSTFKNAALQEDHTDSHFYNGVPIVEYQSNKYRTSWYEDVLPLIDAYDQVESDTSNYMTDVINSLLVINGDFSTANTNVNELIKQIQRYGILGLQSGIDRNGNATSVDAKYISPEFDSAASESYKERIRKDIFNISNIPDMTDQNFAGNTTGVAMRYKIFGFEQAIGQTINAFKRSVADRC…	hypothetical protein
NODE_118_length_4146_cov_5.775346	fig|1578.617.peg.134	3233	4144	+	Putative head protein (ACLAME 50)		atggatagcaagaaatactggctcaagcgtgagcaggcccatgctcaagagttacgtaaagttgtatcgggtaagactgatgagatcatgaaagaatatcgtaaggctttaaacgatattgaagctgacatcaaccgtaattttttgcgctatgctaaaaatgggaatatgaccatggctgaagctatgaaattagccgataaaatggacgttgagcgctttgctgataaagctaagcagtacgtgcaaaaaatggatacttcaccacaagctaatgcagatctaaagctttacaacctgaaaatgcgtgttagtcgcttgcaactgttaaagatggaaatcaaccttgagatcgacagattagcgggcaagctgaatgatgaggcttacaagcatttg…	MDSKKYWLKREQAHAQELRKVVSGKTDEIMKEYRKALNDIEADINRNFLRYAKNGNMTMAEAMKLADKMDVERFADKAKQYVQKMDTSPQANADLKLYNLKMRVSRLQLLKMEINLEIDRLAGKLNDEAYKHLHKVALDEYRRQAGILGQALRFDDKKVKSLVDASYKLGNGYVTFSDNVWHNTEMLKARLGNVLNSAILQGKNPNQYISEFKKIFDAQPYYVGRLLITETARVQGDVQLDSYKQGGIEWYDISFESSACRICRRAASGGPYRHDRAVVGYNMYPFHPNCLCSIMPAEEPNLKL	Putative head protein
NODE_119_length_4129_cov_107.860352	fig|1578.617.peg.135	73	2	-	hypothetical protein		atgaagaaaagagtagttctagtacttgttgcgatctttttagtactagctggaataggaggaacaaagaaa	MKKRVVLVLVAIFLVLAGIGGTKK	hypothetical protein
NODE_119_length_4129_cov_107.860352	fig|1578.617.peg.136	223	107	-	hypothetical protein		atgttggaatttccagcatccttatttttgtataatactaagaagttattattacttaaattaaaaaatgaattgaaaatgattagaaaaagtgctagtattcatcttgtagcttag	MLEFPASLFLYNTKKLLLLKLKNELKMIRKSASIHLVA	hypothetical protein
NODE_119_length_4129_cov_107.860352	fig|1578.617.peg.137	2051	231	-	Acyltransferase family		atgagaatcaaatggtttagtttgatccggatcacgggtctgatctgtgtgctcttgtatcacttctttcaaatgcgctatactggtggctttatcggggtcgatatcttctttacgttctcaggctatctgatcaccgccttgatcatcgatgagttcagtcgctcgcaaaagtttagattgcgtgatttctattatcggcgagtgatgcggatcttgccccccctggtcttgatgatctgtatcgttttaccgttcactttattggtaggtaaagattacattactgatctgacacgccagatcacatcagcggtcgggtttgtgaccaacatctttgagatcaacacgggtggaacgtatgaatcgcgctttattccgcatttgttcgtccacacg…	MRIKWFSLIRITGLICVLLYHFFQMRYTGGFIGVDIFFTFSGYLITALIIDEFSRSQKFRLRDFYYRRVMRILPPLVLMICIVLPFTLLVGKDYITDLTRQITSAVGFVTNIFEINTGGTYESRFIPHLFVHTWSLAIEVQFYLIWGFLLYLLTKVSTSVKQFRLRVLAGSTLLAVGSATAMYLGAQGLSEFSPIYFSSVTHIFPFFVGSVLGSIAGIQDLMPAFSASVEKHWTKNKALAFMVINLALLFILAYFLRFDRRETYMFGFILASLFAAGAIFGANILHRKTPDVKEPQIFVYLADISYSVYLFHWPLFVVLSKQFSNGIAALLTTILSVIFASFSYYFLEPLLRGKPVSLAGREVNFKQIVAPLGGFMTLAIGFGVFLCLQAPTISSLEEN…	Acyltransferase family
NODE_119_length_4129_cov_107.860352	fig|1578.617.peg.138	2419	2048	-	hypothetical protein		atgtggggtagaaaaaatattatcttgctagcctcagggatcttgatcgtggtctgtgtgctgataacttttctcagcaatgcaggtgaaaaaaagaccatgttgactttccgagatggcagcacatatacaggtacgacaaatgagggtaaacccgtcaaaggtacgctcaagttcaaaaacggtgatgtttacaccggtggcttcaaagacgggcatttcgaaggccggggcactttcaagtcacataacggctggacctttacggggatcttccataaaggtgtcgcaaatggcgcgggtaaattgcaggataaagaccacgtcatacaagccgggaactatgttaaaggagagtacaaaggcaaatga	MWGRKNIILLASGILIVVCVLITFLSNAGEKKTMLTFRDGSTYTGTTNEGKPVKGTLKFKNGDVYTGGFKDGHFEGRGTFKSHNGWTFTGIFHKGVANGAGKLQDKDHVIQAGNYVKGEYKGK	hypothetical protein
NODE_119_length_4129_cov_107.860352	fig|1578.617.peg.139	4129	2450	-	hypothetical protein		aacttttacacaattatatggactttatctaaactacccgaaaataaatataaacatagtgaaagagatgcaaaaatcatggtcgatccgatccatctaagctatgaacaattgcgtgatttaaacatttggatcgtagatatcttaaatcaagctcaagctcaattagggtttgacactaagtttgtattaacgcgagaatctatcaattatgccaaagtgattgcagacaactcgacctcggctggttttgcccacagtcagtcggctattgataagggagctgaatatgttcatggtgcagatacacagggagaatcaattgctactggtccaactgttacagctaataaacaaatggtacatgatatgtttgcaattccaatggactatctagat…	NFYTIIWTLSKLPENKYKHSERDAKIMVDPIHLSYEQLRDLNIWIVDILNQAQAQLGFDTKFVLTRESINYAKVIADNSTSAGFAHSQSAIDKGAEYVHGADTQGESIATGPTVTANKQMVHDMFAIPMDYLDATTKDTVSLDELKEIIYTMMTAMIFYDGGNTGGWGHATHLTNDLNNKLAQRNPEHREVYFGFAIDGNGTLHFESFIPEDKTFVDQGGFIVSPNNTEALNQAKAELTSAKQAQSKAQTAHDKAQADLQQAKTKAGQTAQNLAQKQQAAEQALQALNASFVALTASNDNLKTAQANLTAATKAVADLNADAKDKQARLDQAKSNLAKAQANLAQKKVALDAAKQASAKANQALVAAQAQVTVADKDATDAQAKLKDLQAKMVAYKFVD…	hypothetical protein
NODE_11_length_29231_cov_103.345674	fig|1578.617.peg.140	2010	94	-	Lactose and galactose permease, GPH translocator family		atggaaaaacatgcatcaaaatcatttatctccaagttctcatttgcaatgggcaacttggggcatgcagctttttacggcttactgagcaattggttcatcgtctttgttacggcgggcttgttcagtgaactagcacccgcgatcgccaataagttgatcgctttgatcactggtctgatcgtggtgatccggatcattgagatcttgatcgatccactgttgggaaacatcgtggataacactcaaactaggtggggcaaattcaaaccttggatcattgcagggaatctagtcagtgctgtgatcttagtaatactttttactgggatctttaacctagccaatgtcaattggatcgcctttgccgtattatttgtgatcttgtttatcacttta…	MEKHASKSFISKFSFAMGNLGHAAFYGLLSNWFIVFVTAGLFSELAPAIANKLIALITGLIVVIRIIEILIDPLLGNIVDNTQTRWGKFKPWIIAGNLVSAVILVILFTGIFNLANVNWIAFAVLFVILFITLDVFYSFSDVSYWGMVPALSEDSKERGVYTALGTLTGSIGWNGLTVIVVPVVTYFTYVATGKHTQGAQGWLAFAIIISLLAIACAFIVAWGTEEKDNLIRNAAKQKTTIKDVFVGLAKNDQILWASLAYFMFSFANVVTNGVLYYFFKFVLGKPETFSLAGFIAILVGFMTSPLYPVLNKFIPRKWLFSFGQCCMITSYLIFIFARENMALLVVGLVLFNITFAQLVTVLTLTDAIEYGQLKTGERNEAVVLAVRPMIDKLTGAFSN…	Lactose and galactose permease, GPH translocator family
NODE_11_length_29231_cov_103.345674	fig|1578.617.peg.141	3181	2177	-	Transcriptional regulator, LacI family		atggtaacgatcaaacaaatcgcagaagaatctggcttttcacaagctaccgtctcacgcctcttaaatgaagatccgaccttatccgtttcccctgccactaaaaataagatcctcacagtggcaaataagctcggctatggtaaacgccaaaataaatttcttatctcacgtaagatcgcacttttgaccagtttcaccgctgaagaagagctgcaagatgtttattttaatactctaaaagaacttatcctaaaacaaagcaaaaatgccaacttagagatcgatatctttcatgatcttgatcatttgatcgctaaggggaaaaattacgaaggattcatcgggatcggcgcagatgatctttcctcagaaaagctagctaaactccacgaagtc…	MVTIKQIAEESGFSQATVSRLLNEDPTLSVSPATKNKILTVANKLGYGKRQNKFLISRKIALLTSFTAEEELQDVYFNTLKELILKQSKNANLEIDIFHDLDHLIAKGKNYEGFIGIGADDLSSEKLAKLHEVTPLGIFLDINPYPDKFDSVQPDLSQTILDALDLLQRAGKKRIGFIGGVGSIMGQHNYRQDPRAFAFENWAKRLNIFNEKDYFVGGSFTTSNGYELGKKVITNLGTDLPDAFIVASDALAIGVLQAFNEAGIRLPQDTAIISINNIEVSQYVSPPLTTYSIDQKELCQTAINLLCDALERPDRAKIHAFVNTELVIRKSFTL	Transcriptional regulator, LacI family
NODE_11_length_29231_cov_103.345674	fig|1578.617.peg.142	3427	3828	+	hypothetical protein		atgaataagatcgcattgatggaagacgataagatagttaagttgagcatcccacgtggctattacgtatttgcagaaatgtcaacgatggcagactttaatgttaagatgatgttacgcgatgctcaaagtcaaaaagtgtcatttgaaggtgaacgtcagagcaaagatgctttacctccgatccgtggtttttaccaatgtgattatgacgagaccgaattacacattcatattgaagaaggcatcgatttagatctacgtgttgatagcacagatctgtatgatcaaaacgaagagttggcagtgcggacagtcactgcagttgggcgtgatctggctgatgataaatacaatgattttatgctacatttaacgatcatgcgttgtaatgaactt…	MNKIALMEDDKIVKLSIPRGYYVFAEMSTMADFNVKMMLRDAQSQKVSFEGERQSKDALPPIRGFYQCDYDETELHIHIEEGIDLDLRVDSTDLYDQNEELAVRTVTAVGRDLADDKYNDFMLHLTIMRCNEL	hypothetical protein
NODE_11_length_29231_cov_103.345674	fig|1578.617.peg.143	4173	9443	+	hypothetical protein		ttgttatcacgcaataataataaattattaatacataagttagaaccaaagaaacaacgctttgcgatcagaaagatcagtgttggaatcgcttctgtcttgatcggttttacttttgctggttttagtggagtatcagctgatgaagcgacaacaacaactaaagatcacttaaagaccgagacgacgacagaaagttcaagtgtaccaactaaagaagttgagttaacttcaggtactgaaactcaagctaaagaagctaagaccacaccagtagctgacgctaaggctcaagttactaaagatgtcaaagaacaagctccaacgcaaacggtaactgctaaagaaactagtgaagcaccaactagccctgaaaatcaaacggttacaccagctact…	MLSRNNNKLLIHKLEPKKQRFAIRKISVGIASVLIGFTFAGFSGVSADEATTTTKDHLKTETTTESSSVPTKEVELTSGTETQAKEAKTTPVADAKAQVTKDVKEQAPTQTVTAKETSEAPTSPENQTVTPATEDEASETQSFNVEKQAEPQANVDLTDSKVAYAATPTKAKDQQEGGFSVTDPDYSKYSYAGTNLQTLIDDFKIDYQNSEYVFQWIASTNGEHGIVFTVDRGKDADGNVVLTDNGSFNAYEYYTAYRGWSLWGNYTTEVKRKKYVIRYGDNKLDIGHIINDGSRNTITVDHFYTKNETPYTPVFVGGHSGIEKISGNGYGVLSIYTPQVVEQKAKINNGEVYKTQTGLTGQHYTTGIPKNAKVEKGKFLYAKNSQGTMSEFHKDVVLV…	hypothetical protein
NODE_11_length_29231_cov_103.345674	fig|1578.617.peg.144	9664	10488	+	hypothetical protein		atgtattcgtacaagacaaaaaaattagtaacaagtgggattttggtcgctgatgaagttcaagaatttgaacaggtcaagatgttagttgggcatatgtatcatcgaacaaagcgtaaatttaaggtgatcgatccgtatcgcaagggacctttagcaaaagaaagtttggaaatacgtgatgatcggggcaatgtgttgggagaaataccttgtcaaagaattccacacggtcatgtgctcgtgatcccaacgatcttttccaaaaacgatgagcactatactttaaatgaggtcacgaccttattaagagacgatcaagaaaaaacgatcgccgaatacgaactagctgaagtcactgaatcgttgaataagacaacgttgacgacgcactttgtg…	MYSYKTKKLVTSGILVADEVQEFEQVKMLVGHMYHRTKRKFKVIDPYRKGPLAKESLEIRDDRGNVLGEIPCQRIPHGHVLVIPTIFSKNDEHYTLNEVTTLLRDDQEKTIAEYELAEVTESLNKTTLTTHFVTTAGQQLCRADKQTITWKTLKYRDVKTNRSWSGSSIPEESNYLAVKSPLIMGYVAQTAGLGPASLKAKEQQIVYQKLGKIIAIDNGGNILGTKKYCNDRTDPTRAAATFLPYIKGYHRAIKAEAILPSDPSCDIFIKYLAN	hypothetical protein
NODE_11_length_29231_cov_103.345674	fig|1578.617.peg.145	10927	10577	-	hypothetical protein		atggataatgacttgcagattggtgaaaaaatcagaaagcaacgtatcaaagctaatttaacgcaggaaaaattagctgaatacagcgatctttcgatcaattttatctctaaattagaacgtggtcagaagaaaaacatcagtattttaaaactaaatgcgatctgtcgggcacttgagatctcgatctcagaattgcttcaagaagaaagcaatatctcattagcacatttgacccccagctcattgcagctcattcatgagttacagacgctagatcgccctgactgcgaaagcatcagccagcatattttgctattgctcgatgatttcaaaatgatctacagataa	MDNDLQIGEKIRKQRIKANLTQEKLAEYSDLSINFISKLERGQKKNISILKLNAICRALEISISELLQEESNISLAHLTPSSLQLIHELQTLDRPDCESISQHILLLLDDFKMIYR	hypothetical protein
NODE_11_length_29231_cov_103.345674	fig|1578.617.peg.146	11630	11115	-	N1-spermidine/spermine acetyltransferase PaiA		atgactaaaacattaaaacgcatcactgtagctgaagttgaaaccctgcaaaagctaagcattgaaacttttagcgatacttttaaagaccaaaacagcgctcaagacctagcagattacttaaaaacagcctatgatctcagtaaattgactgccgagttaaatgaccctaactcacagttttactttgcttacttggatggacaacttgctggctatttaaagctcaacttaaatgaggcccaaagtgaacaagttgcccctaacgcccttgagatcgaacgcatctacatcagatcagccttcaagcgccatgggttaggccgttttttattccaagaagcgctcaagcttgctcaagaagaaaattgtagcacgatctggcttggtgtatgggag…	MTKTLKRITVAEVETLQKLSIETFSDTFKDQNSAQDLADYLKTAYDLSKLTAELNDPNSQFYFAYLDGQLAGYLKLNLNEAQSEQVAPNALEIERIYIRSAFKRHGLGRFLFQEALKLAQEENCSTIWLGVWEKNYPALAFYEKMGFTHHGSHSFFMGADEQTDLIMVKNI	N1-spermidine/spermine acetyltransferase PaiA
NODE_11_length_29231_cov_103.345674	fig|1578.617.peg.147	12095	11643	-	Uncharacterized transcriptional regulator YybA, MarR family		atgacagagatcttacatgagctcggcacgatcgcccgcgctttagattcgatcagtaatgttgaattcaaagacctaaaactctccaagggacaatatctctacttggtcaggatctacgaacagcctgggatcatcttagaagagttggctaattgcctcaaagtcgataagaccacggcttcacgagcaatcaaaaaactagtcgccaacggtttgatcgaacgccgtactcaacttgacaacaaaaaaaataagcccctttttgtaactaaaaaaggagcccaactctaccctatgcttcgtgccgagcataactactcagaacaaacagcgctaaagcatttgacagcaaaacaacaagtgcaattgcaacaactattgcaacaagtccgccgt…	MTEILHELGTIARALDSISNVEFKDLKLSKGQYLYLVRIYEQPGIILEELANCLKVDKTTASRAIKKLVANGLIERRTQLDNKKNKPLFVTKKGAQLYPMLRAEHNYSEQTALKHLTAKQQVQLQQLLQQVRRNIEKDWEIVKKGQKRNY	Uncharacterized transcriptional regulator YybA, MarR family
NODE_11_length_29231_cov_103.345674	fig|1578.617.peg.148	12266	13072	+	hypothetical protein		atggtagcgatcgatattgatggtacgttggtcaatgatcacaagcagatcggtgaaaaaactaaagcagcgatcaaacaagtacgcaaacaaggggtttatgtggtcttatgtacgggacggccattgtctggggtcaaagattatttagaagaattagccttggtgggagaagatgactatgcgatcacctttaatggggctaaagcacagatcacaggtacaggtaaagcgatctttgaaaatctcttatctcctgaacaagtagctcatttggatcaagtaagtcatgaactccagatcagaggtcagatcgtcatgccaaattctgaagttattacgacttttaaaaatatcagtccgtataccgtacttgatgcgttctatacaaaaatgcca…	MVAIDIDGTLVNDHKQIGEKTKAAIKQVRKQGVYVVLCTGRPLSGVKDYLEELALVGEDDYAITFNGAKAQITGTGKAIFENLLSPEQVAHLDQVSHELQIRGQIVMPNSEVITTFKNISPYTVLDAFYTKMPLYYCEPEKLATHSTAAKYMWVDEPEVITAKLKDLDPEVIADKYTVLSAPWFFEIMHPKAHKGAAVLELGKYLGLTKDQIMVLGDENNDLTMFEVAGFGVAMGNANDQIKDLASAVTADNDHDGVGVALEKYVLKN	hypothetical protein
NODE_11_length_29231_cov_103.345674	fig|1578.617.peg.149	13088	13510	+	hypothetical protein		atgggaattgttggtgaatttttactccatagatggtatgtttttgtgatcgccatcttatattggatcgtgatgaaatatctaggcaaagggacacgttttgctcgcgaagcaagccaagtgtcagctactttgcagatcttgtttttactcgtttatacaggttcagcgttatggttgttagcttcagggacggctgctagtcaagcctttactttatttacgctggtggtcaatgttggcggtgtcgtgttagttttaccgctgtttttgttgatcttgtatcgtttatgtactgctaaatttttagcaagatttcctgaatggggcaagaatttatttcgtttagtttgctttgccttgttaggctttttctcttaccctatcttggcggtagtc…	MGIVGEFLLHRWYVFVIAILYWIVMKYLGKGTRFAREASQVSATLQILFLLVYTGSALWLLASGTAASQAFTLFTLVVNVGGVVLVLPLFLLILYRLCTAKFLARFPEWGKNLFRLVCFALLGFFSYPILAVVVTLYYGW	hypothetical protein
NODE_11_length_29231_cov_103.345674	fig|1578.617.peg.150	13584	15815	+	Lead, cadmium, zinc and mercury transporting ATPase (EC 3.6.3.3) (EC 3.6.3.5); Copper-translocating P-type ATPase (EC 3.6.3.4)	3.6.3.3	atggaaaaagacaattttgcgatcgaagggatggtttgtgccagttgcgcacaaacggtcgaaaaagctgtggcgcaactgccagatgtcagtgatgttgccgtcaatttggcgaccgagagcatgcaagttgaacatggatctcaggtcagtgtgcaaaagatcatgcaggcagtcaaaaatgcgggttatgcagcgactttatccaacactcttgatcaagctgaatttgaagctaagcaagctcagactaaagcgcgtttgttgcataaaaagcgccaaacgatcggcgctttgatctttgcgggtgcgttgcttttagttgcgatgggaccaatgatgggtctagcatttccgcactttttagatgggatgcatgctcctaaaagtgctagtctg…	MEKDNFAIEGMVCASCAQTVEKAVAQLPDVSDVAVNLATESMQVEHGSQVSVQKIMQAVKNAGYAATLSNTLDQAEFEAKQAQTKARLLHKKRQTIGALIFAGALLLVAMGPMMGLAFPHFLDGMHAPKSASLIQLALVLPVLWFGKDYLTTGAKALFARHPNMDSLVLVGSGAALLYSLVNTYLAVVTEQHHDLYYEAAGTIIALVMLGKYFEDLSKQKTNFALTSLLTLVPKKALLVVAKGQTKEVPVAELKVGNTFLVQAGQSIPVDGIVLAGETTVDESMLTGESLPVAKSSGDLVSAGTVSQVGQLTCRATRIGSQTALSQIIALVAKAQGSKAPIARLADRIAGYFVPVIMGIATLGALAWFLTGHSLGFSLTIFVSVLVIACPCALGLATPT…	Lead, cadmium, zinc and mercury transporting ATPase
NODE_11_length_29231_cov_103.345674	fig|1578.617.peg.151	15831	16025	+	hypothetical protein		atggaaaaacatacagtaaaagttgaaggtatgaaatgtgaaggttgcgctaagaaagtgcgtgaaagtttaagtcgcgtcgtgaaaaatgctaaggtcgacttggaaaagaaaacggctgaatacatcggggatgaaacgatcgatggtttgaatcaaaccttggacggaacgccatattcagtcagcaaatag	MEKHTVKVEGMKCEGCAKKVRESLSRVVKNAKVDLEKKTAEYIGDETIDGLNQTLDGTPYSVSK	hypothetical protein
NODE_11_length_29231_cov_103.345674	fig|1578.617.peg.152	16151	17434	+	hypothetical protein		atgcatgattatcgcaaagaagtacagcaattgctcgatgtgatgggggatagtgagcaggaactaactcttggtgctaaagcgatccagttgatcttacaaatggcagctaagggaaatttagctcaagggatcgaagaaaagcaagcatcagtaacacctgaagtaaaagaagacgaagaggagggtccgcaggctcggcctgaagtagaatctgatttaaaatcaaaactagtaacaaaagatgaaaaggagcctagaccattagttcaaaaagttgaaccaatggtagatagaccgactgatgtaagtaaagaaaaggctaaaatagatcggacttcgcagacattacaagcgttgttgagtgaaaaaggtgacagtcaagcgttagacaattgg…	MHDYRKEVQQLLDVMGDSEQELTLGAKAIQLILQMAAKGNLAQGIEEKQASVTPEVKEDEEEGPQARPEVESDLKSKLVTKDEKEPRPLVQKVEPMVDRPTDVSKEKAKIDRTSQTLQALLSEKGDSQALDNWVQKDPKIFERLFDMVMVYKVSTRRIGFKAYNKNNKELRFRETIRNQFNPKNGDAILVSNAHTESPRITKLIRRPAESYYPNTVTFDRGVVEVNADNELIVKRNVSGKKLRVDGELFEYKLPAQAYNIHDGSIVRLRWYANSHGERQNEDISLAWVYPERQEKVTTPAPKKEKGPKPQYQPTIEFDLEGRTVGIVVGRELYRDKYEAIIEAHNGKMLMVDAFYHRRDPENYFSRRLSEADYVVMVQNQNKHNTSYALAKIKDQFQGF…	hypothetical protein
NODE_11_length_29231_cov_103.345674	fig|1578.617.peg.153	17830	20520	+	Acetaldehyde dehydrogenase (EC 1.2.1.10) / Alcohol dehydrogenase (EC 1.1.1.1)	1.2.1.10	atgagcaaagaaaagccaaagaaaaaagtattaactccagaagaaaaagaagcaaagatgcaagcagcgcgtgtttataccgatggcttggtcgaaaaagcgttaaaggcagaacaagagtatgcgacctttacgcaagaacaagttgataagatcgtagcggctgcagctttagctggctctgaagcagctttgactttagctcacgaagcagtcgatgaaactggacgtggggtagttgaagataaggatactaaaaatcgttttgcaacagaaaatatttataacttgatcaaaaatgaaaagacagtcggtgtcatttcagaagataagatcaagggccaagttaagatcgcagctccattaggtgtcttagcggggatcgtcccaacgaccaac…	MSKEKPKKKVLTPEEKEAKMQAARVYTDGLVEKALKAEQEYATFTQEQVDKIVAAAALAGSEAALTLAHEAVDETGRGVVEDKDTKNRFATENIYNLIKNEKTVGVISEDKIKGQVKIAAPLGVLAGIVPTTNPTSTTMFKALMALKTRNAIVFAFHPQAQNCSVHAAKVIYEAALAAGAPKNIIQWVEKPSLENTTGLIQNPKIASILATGGPGMVNAALRSGNPSMGVGAGNGAVFVDHTANLDRAVEDLLLSKRFDNGMICATENSAVVEAPIYDAWLQKMQEKGAYLVPKEDYAKIEDFVFNDNHGVNGPVAGKSARWIAEQAGVFLPEDKDVMLFELDAKNIGEKLSSEKLSPLLSIYKAKDRTDGVKIVGALLDYQGAGHNAAIQIGSQTDPF…	Acetaldehyde dehydrogenase
NODE_11_length_29231_cov_103.345674	fig|1578.617.peg.154	20707	21888	+	hypothetical protein		atgaatattattattattaatcgttggcaagatgattttgctgattatcaaggagtagtagaccataaacttaatgatgtcgtatacataactaataattctggaagtaaatatttggatagtgtagtagttccttatgaacattatgttgttgataaacttgaagatatcaacaaattaatggaaatcgtagccaaaatagtgagagaaaaaggaaaggtagatagactgctcgcactatcagaatttgacataagaaatgcgggtgttttgagatctaaatttaatattcctgggatgaacgagcagactgctaaaaattttacagataagatatcaatgaaagaagcgctaaagaattcgagtattcgatacccgaagtatacaaaagaccctaat…	MNIIIINRWQDDFADYQGVVDHKLNDVVYITNNSGSKYLDSVVVPYEHYVVDKLEDINKLMEIVAKIVREKGKVDRLLALSEFDIRNAGVLRSKFNIPGMNEQTAKNFTDKISMKEALKNSSIRYPKYTKDPNDIITGKLKFPIVQKPREGAASEGVHIIDDLASFRKLLDRNPAGYDYEEFVSGNIYHVDGIKHDTELQFMKISRYINTCYEYEKFKTPLGSLLIKNPLLYEKIYKMTLKVLSTLGMETGVFHLEFILHDNEPVFLEVGARQGGGEIVPMLKQIYGVDLVLALLKSQMLEDISMLTGQENGNYGGFLLFPEPVRTPVKVKNKTIFGGKLKTLVYEITPSIGQVLDGNGGYYFNAGRFLFVGPSEGVKEDLDYVLKNYEVAYE	hypothetical protein
NODE_11_length_29231_cov_103.345674	fig|1578.617.peg.155	21881	23098	+	hypothetical protein		atgaataaaaaaattatgattttagagcctgatacaactgcgggagaattattagttagtactgcaaagaagttgaattttgaagttgtaggtgtaacaacagtcgacgtttatgagacatatagtcaagaattgcgctcaaacttaagtaaagttatgttaacacaatttacagacttatataaagctcgtaaggatattgttgcatttgcatcagaaaataatgttcaaggagtagtaagtggatttgagtttttctctgatttagcagttgaggttgcaacggatttaggtcttcctaccaataatattgaattttctaaagtatatcgtgataaataccttatggctaaattgtttgcaaaagtaaatattcctagtgctaaaaccatacgtata…	MNKKIMILEPDTTAGELLVSTAKKLNFEVVGVTTVDVYETYSQELRSNLSKVMLTQFTDLYKARKDIVAFASENNVQGVVSGFEFFSDLAVEVATDLGLPTNNIEFSKVYRDKYLMAKLFAKVNIPSAKTIRITDDVDLYELDYPLIAKPSKNAGSCFVKKVNTPAELQEIACIISKNDKEFPHGFQLKSDLLVQEILDGPEFSVEVISFNGMVHVLCITDKITTHGDFFAEVGHILPSCVDKIAEDKISQVAVKAVTALGITNGVAHVEVILTSTGPKIVEVGARLPGDYIPNILLDATGINEAELYLKVALGMPVNLERKWSKYSGVRFIRNLYSGKIKKFDVADNIEVTKYVDVGDCVEQSPDNVSRLGHYSTTKDCYRSVTHDLKKALANTEVVY…	hypothetical protein
NODE_11_length_29231_cov_103.345674	fig|1578.617.peg.156	23076	24311	+	hypothetical protein		atgaaaagaattgccctgattagatctgtagacgttaaacaagctcagcctatgcttttctctatgtcaaaggaattatctaaattcgctagtttgaaattattctatagtgatggtgagtgtgggaaaaaagatttttgcggagaatttgaacattttgaaaatagtttaagtttagtagagttggctgataaagtgttgtcatggaatccagatgttgtaatatcaatttctataccagataataatgcacttcgagatgctgtattagcagattatttgaaaataaaaggtgtgaattttatagctcatccaatacagtctacattgctattgagcaataagtgggaaacaacaaagtatttaaaaagcatgggtgttagtgtacctaaaacggtc…	MKRIALIRSVDVKQAQPMLFSMSKELSKFASLKLFYSDGECGKKDFCGEFEHFENSLSLVELADKVLSWNPDVVISISIPDNNALRDAVLADYLKIKGVNFIAHPIQSTLLLSNKWETTKYLKSMGVSVPKTVYASGDLISNRVDSYSSIYVDVLINELNNLEFPLIAKPLWDSMSQGIKILKDMEETRSFLSTLTVDYIFQEYILGELLGIETITHNENVYFQPLVRKYTSENLVPFDHLRYGPYNGIPKVLLDRMKKKIRNVCLDLKLNGSIEFEMIYDRNANNIYILEINPRISGMTNLSSLISGVNSYTLLGQIEKIDIMVSKERYVAEVPLRKLNDESIEKIKKINEIESIQSVSYHTGKQQVKTLIASDSLSQVIKTIFLLNEYGLIPNNIMK…	hypothetical protein
NODE_11_length_29231_cov_103.345674	fig|1578.617.peg.157	24289	25329	+	Thymidylate synthase (EC 2.1.1.45)	2.1.1.45	atgaaatgtcacaatcagactgaggcactggtacaggtgctcagagaaattgataataatgggagagaagttacaactcgaggttttacacaaaaagaaatcttatccagtcttattactattgataatcccaatgaaagagcaattgtattgaagaatagaaataataatatttttgctttgattgctgaaacattatgggttttagggggaagaaatgatcttggtttcttgagtcactatttacctagagcaatagatttttctgatgatggattaacttggcgtgctgcgtatggaccgaggcttagaaattggtatggtatagatcagtttgagactattattgatagaataaatgaagatacctatactaaacgtgcggtaatgactattttt…	MKCHNQTEALVQVLREIDNNGREVTTRGFTQKEILSSLITIDNPNERAIVLKNRNNNIFALIAETLWVLGGRNDLGFLSHYLPRAIDFSDDGLTWRAAYGPRLRNWYGIDQFETIIDRINEDTYTKRAVMTIFDPQLDFVETKDVPCNNWLHFMSRDNKLNLDVVVRANDAIWGFGGINAFEWSVLLQLMSYWTKLEVGSMTWYTSTMHVYSRHYNRYKKIIDSYTGITPYTNGFRTLEFSTPFKEFSDLLQNCFLLEKLEREQVNDELYTKICTEITDPMFSVWMRLLFVYNAYLQGKDSEELNRYFQNIPECDLKISALEFFYRKGIELNLTVKERKFFERYSL	Thymidylate synthase
NODE_11_length_29231_cov_103.345674	fig|1578.617.peg.158	25326	26489	+	hypothetical protein		atgaaaaagaatgttactctttttattactagtgactttatttctcaattcagtgccggcatcgttttagcagctttgaattggtacataattgatgtgtatcagtctaacagtttagtagcaacgatcgctaacatcaatgtcattgctgggttgataatttctttagtagcagttggcttactaaaaaggatgaattcaaaacgtatcgcattgatgtcatacttctttagagttattttcatagcactaccgttgatattactaaagctagggattgatgatcgtctagcgatctacctgttagctttgagtaatggtattggctggaatctatattttccagcatccaaagatatcttgaatagttttactgtcgaagaaaatacactgcagctc…	MKKNVTLFITSDFISQFSAGIVLAALNWYIIDVYQSNSLVATIANINVIAGLIISLVAVGLLKRMNSKRIALMSYFFRVIFIALPLILLKLGIDDRLAIYLLALSNGIGWNLYFPASKDILNSFTVEENTLQLNSFAEISMQVGLFSAALVSGILYRYIGFENILLLGTSLFFAALIIFALVKYQESDKVEAIEQQGVFAYLIGHKWLLILGLVLYIPFIGANVINTTLPGYIQAHLSGNSISYGFTDTMYGVGACLAGVLLPVIAKFINKEHLIFPLFSIAVLLGVVLVLNHSLALTAGYIFLLGSVGPAIRTIIYTRTMEIVPGKLLGPLVSVWNFINLIFQFVANYSVGRVMDIVGPQWGFMIYASTMLLGILLFIGIKNRYRA	hypothetical protein
NODE_11_length_29231_cov_103.345674	fig|1578.617.peg.159	27547	26564	-	Tagatose 1,6-bisphosphate aldolase (EC 4.1.2.40)	4.1.2.40	atgataggaaaaacaacggctttacagcggctctctaactctgatggaattattgcagcccttgcgatcgatcaacgtggctcattaaaaaagatgttggctaaaaacgccgaccatcccgtaaccagttctgatctaagcgagttcaaaaaagttatctctcaaaaaatgacagcgtattcatcagcaatcttactcgatccagaatatggtttgcccgcagctttggcccgtgacaacaactgtggccttttactagcttatgaaaaaacgggctatgatatcagcgaaccaggacgtatgccagatcttttacccgcttggtcggctaaacgcttaaaagaagcgggcgctgatgctgttaagttcatggtctattatgatgtcgatgaaccaatg…	MIGKTTALQRLSNSDGIIAALAIDQRGSLKKMLAKNADHPVTSSDLSEFKKVISQKMTAYSSAILLDPEYGLPAALARDNNCGLLLAYEKTGYDISEPGRMPDLLPAWSAKRLKEAGADAVKFMVYYDVDEPMAINEKKQAFIERIGSECVAEDIPFFLELMSYDANIEDTKGKEYATVKPHKVIEMMREFAKPRYNVDVLKVEVPVNMAYVAGFAKDEEAVYTKEQAAAYFVEQTKAAAGVPFIFLSAGVSAQMFQDTLYFAHEAGSKFNGVLCGRATWQDSIVPFVQDGAGAASLWCETKGKANIEALNTVLKETATPLASINLI	Tagatose 1,6-bisphosphate aldolase
NODE_11_length_29231_cov_103.345674	fig|1578.617.peg.160	28362	27655	-	Transcriptional regulator, GntR family		atgaagatccctaagcaccaactcgtcaaaaataatctcaaaaatgaaattttatccggcaaatttgaaagcggcgacaaattctatagtgaagctgaactcaccaaacgctttcatgtcagttcgatcaccgtgatccgcgccttaaaagagctcgtcgctgagggttttttagtgcgttaccaaggtaaaggggcctttatctcacgctcgcgcaagttaaagaccgttaaatttagcgatctcgaggtcttttcgcctcccgatgaccgcgttgaagtcatcagcatcactcgagataaccgttccacgatcttaacacatttaggccttgcctcaactgacttttattatgcgatcgaacgtgtacgccgggctaaacagatcccatatatctat…	MKIPKHQLVKNNLKNEILSGKFESGDKFYSEAELTKRFHVSSITVIRALKELVAEGFLVRYQGKGAFISRSRKLKTVKFSDLEVFSPPDDRVEVISITRDNRSTILTHLGLASTDFYYAIERVRRAKQIPYIYHCTYLPERFVTHPQDLSYYNSIYTQMKNEFKIQLNTEPFVEYNQIILPTPKKIATLLEISEETPTVKQERTTTLSLSGQIIEYICSYKRWEYYKIKLESPTQ	Transcriptional regulator, GntR family
NODE_11_length_29231_cov_103.345674	fig|1578.617.peg.161	29088	28369	-	hypothetical protein		atgataaaacgccctaaatacgctattctagcagacaaattgatcaaaaatattttagagacccagcagccaacgaatacccgctttttcacagaaaaagaattagcgcacaaatattcagtcagtcgctccaccgtacgcgctgctctaagcgaattagaagatttaaaattgatcgccaaagctaaaaatgtcggttattatgtaacctatgaacccgttcaatatgattacgcacatttttacagcttcagcaaattggatatgcccgctgagcaggcgcccacgactgagatcttacttttcacccagacgatccctaactactatgtggcccaaatgctccatttagctcaagatgagcccgtttaccgcgttgagcgcctacgcttgttggga…	MIKRPKYAILADKLIKNILETQQPTNTRFFTEKELAHKYSVSRSTVRAALSELEDLKLIAKAKNVGYYVTYEPVQYDYAHFYSFSKLDMPAEQAPTTEILLFTQTIPNYYVAQMLHLAQDEPVYRVERLRLLGHQPVLFEKTFLPAERFPALKRNELVKNSLYDLLATKYQLKIKDGAEEFFASLINEREADLLDLRVGSPCLKIQRLAYDIFERPFEFTITTAPSRYFAYKVPLTKDV	hypothetical protein
NODE_120_length_4052_cov_80.230406	fig|1578.617.peg.162	302	27	-	hypothetical protein		ttgcaaaataaattaggtattactgatcaagcggagttagcgaaacaagaagagagcttatctaaaaagagagctaaagaattgatcgaaaccaaaaaattatttgagtttgaaattggaacctttaagggcttatcggctattcaccactatctattccaagatatttacgattttgcagataaaatacgtgatgtaaaccttgcaaaagatgatttttcaagggctctatactttttactgtgtaatgatactatttcattacgcagtttttga	MQNKLGITDQAELAKQEESLSKKRAKELIETKKLFEFEIGTFKGLSAIHHYLFQDIYDFADKIRDVNLAKDDFSRALYFLLCNDTISLRSF	hypothetical protein
NODE_120_length_4052_cov_80.230406	fig|1578.617.peg.163	618	3860	+	Type I restriction-modification system, restriction subunit R (EC 3.1.21.3)	3.1.21.3	atgagtaatttcgatatgtttcaaaaacaatggccaatatttgcgaaattaggtgggcgtgcagaggtaaatgtctatagtgatccaaatatttccatgattaaaattcgccaatttgcagagcaaatgacggaagcgattttttctttggaaagattaacaccgtggaatctagaaacacaagtagataaacttcgtgaattagagcgtgtaggtgtattagactcggatatttcggctatttttcataaaattcgtatagttggcaataaagctgtacatgatggttatgatgatgagagagaggcaatgaacatgcttcgtttgtctcattatttatcaaattggtttatggaagtctatggagatttgaactttaaaacgactgaatttattgaa…	MSNFDMFQKQWPIFAKLGGRAEVNVYSDPNISMIKIRQFAEQMTEAIFSLERLTPWNLETQVDKLRELERVGVLDSDISAIFHKIRIVGNKAVHDGYDDEREAMNMLRLSHYLSNWFMEVYGDLNFKTTEFIEPKDIDKFNAEEIAKLKAQIELAESEKQEFQAQLEKIARSQKDESEASFNKLKSDRRQRSRKFLRNNDLTEKQTRIMFIDEQLRDAGWEADTKELDWCNGARPEKGKNKAIAEFPTKNGHRADYALFIGLKLVGIIEAKKYNQSVAGDIVQSKEYAKEVASALEYTFDEVNDGYKVPFIYATNGRPYLKQLAEQSGVWFWDARTPQKASYALESWHSPQDLLQKLVVDEKKAEKELKEEPYPEFVERKYQIAAIEAVEKGLAEKKRR…	Type I restriction-modification system, restriction subunit R
NODE_120_length_4052_cov_80.230406	fig|1578.617.peg.164	3886	4035	+	Type I restriction-modification system, DNA-methyltransferase subunit M (EC 2.1.1.72)	2.1.1.72	gtgacaaataatgaaattgtacagaaattgtggaaaatggctgatgtgcttcgggatgatgggatcagttaccaaaactatgtgacagaattaacgtatattttatttttgaaaatgatgaaagagcaagaaactgagtcaagtccataa	MTNNEIVQKLWKMADVLRDDGISYQNYVTELTYILFLKMMKEQETESSP	Type I restriction-modification system, DNA-methyltransferase subunit M
NODE_121_length_3950_cov_114.484810	fig|1578.617.peg.165	1924	107	-	Glutamine--fructose-6-phosphate aminotransferase [isomerizing] (EC 2.6.1.16)	2.6.1.16	atgtgtggtatcgttggcgtaactggcaatgaaaatgcaacagatattttattagatggattacaacaattagaataccgtggctatgactcagccggtatctatgtaaatgaccaacaaggtgatggctttttagttaaggaaaaaggtcggatcgctgatctacgtgctttagttggtccagaagtcaaaggctcgactgggatcggccatacacgttgggcaacacacggagttccaagtgttaaaaatgcccatccccatgtttcagtcgatggacgtttcttcttagttcataacggtgtgatcggtaactttagccaattgcgcgatgaatacttgggagatgttgaattaaagagtgatacagatacagagatcatcgtgcaattgatcggt…	MCGIVGVTGNENATDILLDGLQQLEYRGYDSAGIYVNDQQGDGFLVKEKGRIADLRALVGPEVKGSTGIGHTRWATHGVPSVKNAHPHVSVDGRFFLVHNGVIGNFSQLRDEYLGDVELKSDTDTEIIVQLIGKFAAEEMDTLAAFRKVLGLVDESSSYAFLLMDKEQPSKLFVAKNKSPLLLGVGDGFNVVCSDATAMLEQTHDFIELMDGEVVVVEPDKILIMDPAGNAVEREPFHIDMDPQAAKKGAYPYYMLKEIDEQPGVMRTLIQEYVNEDGSVKIDQELLDALSKADRLYIVAAGTSYHAGLVGKELFEKLAHIPTEVHVASEFAYNPPLLSEKPFFIFLTQSGETADSRQVLTQVNEWGYPSLTITNVANSTLSREATYTLLLHAGPEIAV…	Glutamine--fructose-6-phosphate aminotransferase [isomerizing]
NODE_121_length_3950_cov_114.484810	fig|1578.617.peg.166	3911	2055	-	hypothetical protein		gtgggggaaaatgtagctttgaagcaattacaagtgatattagggatgcagaccgaactaattgaaccacttaaaccaaagagtcgtcaaaatgctttggcagccttgctgttattagctgaccaaccgcaaaagatcatcagtttagcgttagaattggacgtcagtgaagggacgatccaacgtgatctaagtggattagaggaagcatttgctggttttgcgatcaagttgcaacgccaaaaaggtgtaggtgtttggctagaaacgactgaactcaaacggcgtcagtttttaagtgagatcatgttgaatgaactcaatgactatcaattttttgcttatctagatgataaaacaacgatcgtacccgactttttcttacgattattgcctaaa…	MGENVALKQLQVILGMQTELIEPLKPKSRQNALAALLLLADQPQKIISLALELDVSEGTIQRDLSGLEEAFAGFAIKLQRQKGVGVWLETTELKRRQFLSEIMLNELNDYQFFAYLDDKTTIVPDFFLRLLPKKLLQQCYQGLEQKVLPKLKVTSDHQVLQLVILFAICLVRSKKHPVKVELKDQLLRYQALVYAFLSAVDEELEQNELTYLAYQLKKGDQNAKSFTYTDEYELAVSLKVKALIALVSQKMKFDFSRDLVFFKKLSRHVITLLKQPHQGLPNVRIETLARIKNDHPELFACVKRAWKEIFFEQAISETELQLILLYFASQYVGTKRSDKLAVLIVCENGIGTSSLLKQRLKKELPQVEHFKLARIQELNELELAEYDIVLSTLRLPGFP…	hypothetical protein
NODE_122_length_3935_cov_18.395182	fig|1578.617.peg.167	363	25	-	hypothetical protein		atgacacaagaagaatatttaaaaatctatgttacatcattagaaattatcagcaagtatcaaccatgtaataacaaaaaagtaattgatgaacttgtcaaaaatgatctaatgaaaaaattagtaagtaactacggtgttaatcgtgtaaaaattgaaatggataacttgtttagaaatatgttaattgaccaaacagttattggaaaactaactaacttttcaattgaatttactggtgtaacaacaaatggatataacttgcttgaattgcacgaagataatcataaatggacagataccattaatgacataaaaaaagaagcacctatgaagtga	MTQEEYLKIYVTSLEIISKYQPCNNKKVIDELVKNDLMKKLVSNYGVNRVKIEMDNLFRNMLIDQTVIGKLTNFSIEFTGVTTNGYNLLELHEDNHKWTDTINDIKKEAPMK	hypothetical protein
NODE_122_length_3935_cov_18.395182	fig|1578.617.peg.168	895	416	-	hypothetical protein		atgtctaggaatactattcgattagatgtagaacgacttattaagcaaactggttctaccgatccctttgaaatatttgattacatgaatgtgattgtacaatatgacgagttagggaaagatattttgggatatactctacgttataaagatgttattataatcgttctgaactctcggctttcagaatcggaaaaatatatcactgcttgtcatgagctgggacatgtcatttgcggacattcactaaatgctgaatttctaaggcgatcaaatcttacttatgttaggcaaggtaacgaatatgaagcaaatgtgtttatggttgaattactaacctacaaagcaaatgctgcagagttcgcaaatgaagatcagcttctctatgattgcggtgtt…	MSRNTIRLDVERLIKQTGSTDPFEIFDYMNVIVQYDELGKDILGYTLRYKDVIIIVLNSRLSESEKYITACHELGHVICGHSLNAEFLRRSNLTYVRQGNEYEANVFMVELLTYKANAAEFANEDQLLYDCGVPKWAERYIDWSYLKARADFNSSSSIY	hypothetical protein
NODE_122_length_3935_cov_18.395182	fig|1578.617.peg.169	1319	909	-	hypothetical protein		atgatgacaggtcagcgtattagagatttaagaaaagaaaaaagattatctcaaacagaattagccgatgtcgttcatgtttcacaacaaactataaccgcttgggaaaatgacaaagcagaaccttctagcagtgctatagcagcattagctgattactttggggtaactactgactatcttctcggtcgtacccctactcctcaatttactgccaaagaggaaaatgatcttcaagtaatattaaaaaatactatcaatggactcagcaatgaagctggattgtcatatttgaaaaacggtggcatagatctagatgatgaaagcgccgaattgatgaaagattcgcttgaacgagctttacgacgagcacagttattagctaaagaaggatttact…	MMTGQRIRDLRKEKRLSQTELADVVHVSQQTITAWENDKAEPSSSAIAALADYFGVTTDYLLGRTPTPQFTAKEENDLQVILKNTINGLSNEAGLSYLKNGGIDLDDESAELMKDSLERALRRAQLLAKEGFTSKR	hypothetical protein
NODE_122_length_3935_cov_18.395182	fig|1578.617.peg.170	1484	1681	+	hypothetical protein		atggtaactgaattaagggttttgcgaatccgaaaaggtttaaatcaagaggaattagcaaaacaattgaatgttacaaggaattcagtgtctgcttgggaacgtggtactaaaccaagcttagataatgctaaaaaaattgcagatttttttgaagtaccaataaatgaaattttttttgagaaaaaatacaattaa	MVTELRVLRIRKGLNQEELAKQLNVTRNSVSAWERGTKPSLDNAKKIADFFEVPINEIFFEKKYN	hypothetical protein
NODE_122_length_3935_cov_18.395182	fig|1578.617.peg.171	1757	2047	+	hypothetical protein		atgttttacgtaacaaacacaagaacaaaattttcaggggctatgaatactagtgaatggatcaaaacagattttattggttgctttgaaacgttggaagaagcacaagaagccgttacaaagttcatggacaaagtcaaagcgaaagttgaagaagtgagaaccagtagctatggaaagtacgaattctatgtaactgaagtcagaatggcttcagagtacgtgaataatttagaaattcacgagagattagcaaggagtgataaacgtggcagaaatgacacaaattaa	MFYVTNTRTKFSGAMNTSEWIKTDFIGCFETLEEAQEAVTKFMDKVKAKVEEVRTSSYGKYEFYVTEVRMASEYVNNLEIHERLARSDKRGRNDTN	hypothetical protein
NODE_122_length_3935_cov_18.395182	fig|1578.617.peg.172	2034	2720	+	hypothetical protein		atgacacaaattaaagaagaatcatatcaacttaagcgtgcaaaaggaaagctagaacgcttaaaaaaagaatttgctcaggtagacgaacagttgaacgcacattacaagattaccaatggacagccaatgaacgacaagagaaacggtgctagttggtttaagaaaaaagacaggatcgaagagagaggatttcgattacttgatgaaatcaaacaacaagaagagcggatagaaaagcttgaggatagagaagaaaataaagctctgggcttgaatcgacaaggtaacggcttagaaatgagcgttgcgaatatcccacgaattgaagaagaaattgaaaaatttaaacgtggtgaatcgcgatatacaaaaactactatcaaacgctatgagatg…	MTQIKEESYQLKRAKGKLERLKKEFAQVDEQLNAHYKITNGQPMNDKRNGASWFKKKDRIEERGFRLLDEIKQQEERIEKLEDREENKALGLNRQGNGLEMSVANIPRIEEEIEKFKRGESRYTKTTIKRYEMELVKLKEMAKKAEQKLTAGAQKLVDDGLLRQWKKKPTIYFVTDRNFKKLALELNSEGKFEESSVYRYRATTDEAKAYVQKLLSMQKEINGGVTVG	hypothetical protein
NODE_122_length_3935_cov_18.395182	fig|1578.617.peg.173	2713	3057	+	hypothetical protein		ttggatagcgcaaagcacacacaatttggtggagtaaatgttcgaatgggacgacaagatggaagttataaatacaatctcaatgatatgggatgggttgaattagtcaaatacagtatcgagcaggaaaccaattcagttgaaaatgagttaagacctgagaacttatttgaaggtgatttgatcattcaacttcattttctaaataaaaaagcttccacagatccacaaaagtgtttcttggaagctgtaacacaacttgtaatgaatggaaaagctgagcttcctgacaaactatttgtggctcaacagtctagcgacgacgaaccccgaagccatacttag	MDSAKHTQFGGVNVRMGRQDGSYKYNLNDMGWVELVKYSIEQETNSVENELRPENLFEGDLIIQLHFLNKKASTDPQKCFLEAVTQLVMNGKAELPDKLFVAQQSSDDEPRSHT	hypothetical protein
NODE_122_length_3935_cov_18.395182	fig|1578.617.peg.174	3314	3538	+	hypothetical protein		atgatgtacagggtgattgaaacaacatcagatgacaacaagagaatcagtattggaacgtatccaagtgaagccgaagcacacagagctgtttcagaatttgcacagaagcatgtgcatgtagctaagatcttacgcaagcgatacagcttacgactaggtttagatcaagcaacagtgactattgatgattgcagttactgttacaaggtggaaggaggctaa	MMYRVIETTSDDNKRISIGTYPSEAEAHRAVSEFAQKHVHVAKILRKRYSLRLGLDQATVTIDDCSYCYKVEGG	hypothetical protein
NODE_122_length_3935_cov_18.395182	fig|1578.617.peg.175	3543	3815	+	hypothetical protein		atgcaagtaacattgtcagaagaagatgcaagactcattgctaaatacgtagctgatgagttgattgcaagacagccagtgcaaatgatgacaatgaaagaaaaacgaagccgacgtctggatatcggacaagcagcagagtatatgaacaggagcagaagcactattgatcgctggagaaagacaaaaccagcattcaaagtgctggaacatatcgacggaacatcaacatattttttgtccaacgaattagacgaatatttaaatcaataa	MQVTLSEEDARLIAKYVADELIARQPVQMMTMKEKRSRRLDIGQAAEYMNRSRSTIDRWRKTKPAFKVLEHIDGTSTYFLSNELDEYLNQ	hypothetical protein
NODE_123_length_3832_cov_119.735193	fig|1578.617.peg.176	2	1147	+	contains gram positive anchor domain		acaccagatcaaccagtaccagagatcccaggctaccgtccagaagtaccaagtgtgacaccaacagatccaggtgaagacacaccagttaagtatattccagtaacacctgaaaagcatgtgcaaacagctaagatcgtttatgttgatactaagacaggcacaacgatcgaatctgattccgtgacaggtaatgttggggacaagatcgattactcaactacttcccggatcactgaattgaccaagaagggatatatcttgatcgaagatggctttactaatgctggtactccagtctacaatgacaacggagaagaacaagtctttgttgttaaattaggtcatggtactgaaccagttgggccaaataacccacatgaaccaggtacaccgatc…	TPDQPVPEIPGYRPEVPSVTPTDPGEDTPVKYIPVTPEKHVQTAKIVYVDTKTGTTIESDSVTGNVGDKIDYSTTSRITELTKKGYILIEDGFTNAGTPVYNDNGEEQVFVVKLGHGTEPVGPNNPHEPGTPINPDDPNGPKWPAKDDYTKQYTSTVHFVDSNGNKLRDDDIQTSTWTRTLIVDKVTGEVLNPSEPWKSDIDDYATVKVPVIEGYYADRATVPGETAQQRDLETTVTYNKIGKIVPVDPNGNPIPNVPTPQYRNDPNDPTKVIVTDTPDIPGMIPETRSVTPGKPGVDTPVVYHKVETPEQKPEQPAQPEVTPVVNGPVQTPAPKAETPATELPQTGDKQGNALAAVGASIVAGMLGLIGFTKKKKDEKDF	contains gram positive anchor domain
NODE_123_length_3832_cov_119.735193	fig|1578.617.peg.177	1390	2751	+	hypothetical protein		atgtcgtcagaaaagatcgtgatcgtgggagcaaaccacgctggtttagcggtggctaggaatttgatagatagcggaaaagaatttgagatcacaatgatcgataagagtgatgatctaggatatctcagctgtggtacaccgttattattaggtaatgaagtcaattcatatcgaaattttttctacattaaaaatgatgagttacgtaagcagatcgcagcgctacacactaaagcgcaagtcaaatcgatcgattttagaaataaaaaagtgatctttagggataaacaagggttacagggagttaagtatgataagctagtgttagcaacgggagcgtcgcaagttagtttagggatcagtggtagtgatctgcgtgggatctatcgtatcaag…	MSSEKIVIVGANHAGLAVARNLIDSGKEFEITMIDKSDDLGYLSCGTPLLLGNEVNSYRNFFYIKNDELRKQIAALHTKAQVKSIDFRNKKVIFRDKQGLQGVKYDKLVLATGASQVSLGISGSDLRGIYRIKNLNEALEVNQRLDLNNVKNVAIIGGGYIGIEVAEAIQKRGKHVTIYDANPYLMSAHYDEQFGHLVEGRLREKGIDLCLAEEVQSYVGKAGKIAQIITDRGKYLTDMVILTMGFLPNTSLGRFHLELYTNGAYIVNEYQQTSDPDVYAVGDCSTSYSNILKELVVNFSVSDAMRGAYVAAKNIAGETISSNGTQTSNAVQVFGLNLFSTGITVTQAERYNIPCEYVDYETWQRPKFMLKNDRVKLRLVYHKQTHRLLGAQIATESDQ…	hypothetical protein
NODE_123_length_3832_cov_119.735193	fig|1578.617.peg.178	2741	3442	+	hypothetical protein		gtgttgactgagcaaaaaacgacagaatttttagcagccttagatgattttgtagctgatatagcagatcaaactaaagcattaagattctacacttgtttaggaaatgtcaaactgtatgttcttttggaatatggttaccctaaagtgaagataaatggtgataaaaaagagcttttagtttatacttcagaaccaactgagctactaaaagtagatggattaagtacagttgccctagggctagaccgtttggcgcaagaattaaaaaattcagctgcgagtggcttattagttgatgaagcgactcgcaatataagtattccggcggacaacgttttttatgtccaaaatttgcaaaaaaaggcggctacttttaagctgaaaacgctacctgaa…	MLTEQKTTEFLAALDDFVADIADQTKALRFYTCLGNVKLYVLLEYGYPKVKINGDKKELLVYTSEPTELLKVDGLSTVALGLDRLAQELKNSAASGLLVDEATRNISIPADNVFYVQNLQKKAATFKLKTLPEQGTLILENEIRRIVKAHPEVTSAWLLGILLPGKNNYQYMVTLEYSLTATNEVKQVTPKQIAENVTPLLADGQELFIGTTEELAGKKAKQEFAPFYIKLNF	hypothetical protein
NODE_123_length_3832_cov_119.735193	fig|1578.617.peg.179	3460	3831	+	Sortase A, LPXTG specific		atgaaaaaatttttaaagtattgtctgatagtagttttgttggtggtcggcttagctttgatctttaaccaacagatcaaaaatgcgctagtcagtcatatgaccacgtcggcagtcagcacgactgtcgttaagccacagcaaaattcaaaaaaggcaaattttgattttaaaaagatcaaagctgttgatagtcaaatggttgttagtgcagccacgagtgcaaaaaatgctgctatcgggaaaattgcgatgccaagtgttgggttaaaacttccgatttttgaaggattaaataatgaagatctcgtacgaggcgctggtacgatgaagcaaggcgaacagatgggagctgaaggtaattatgcctta	MKKFLKYCLIVVLLVVGLALIFNQQIKNALVSHMTTSAVSTTVVKPQQNSKKANFDFKKIKAVDSQMVVSAATSAKNAAIGKIAMPSVGLKLPIFEGLNNEDLVRGAGTMKQGEQMGAEGNYAL	Sortase A, LPXTG specific
NODE_124_length_3764_cov_132.899223	fig|1578.617.peg.180	3528	1	-	hypothetical protein		atgctttcaaaaaataataagaaattacaagctcaaaagatggagcccaagcaacaacgctttgcaatcaaaaagtttactgtaggggtagcttctgttttggtcggaacaacgtttgcaatgtattctggtgctgggaatgtatcggctgatgaaactgcaaccgaaaatacatcatctgaagtggtggaaaataaatcagatgatgtaaacaataaagaagtagttttgtcaaatgcggctacaaatgcagaggtggatagcacaagtaccgcaaatactgatgctacagctcaacctacagaagaaagtgcgcaaacccaagcgaacgaagcagagaaggcaactgatgctgttgagaatgaagcagaagctacgacagcctcagatgttgccaaa…	MLSKNNKKLQAQKMEPKQQRFAIKKFTVGVASVLVGTTFAMYSGAGNVSADETATENTSSEVVENKSDDVNNKEVVLSNAATNAEVDSTSTANTDATAQPTEESAQTQANEAEKATDAVENEAEATTASDVAKDEATTVQPEEGVNAQAEKPVATSAFRAATTDADETTDTSATPGDPNTSVSAALQEELEKNAVYSPGVKGEKKSYAGKAWLQTTGTAINAFGSGDVPMAGVKVYLQWVNGKGHVSKVYYTTSEADGTYVINLDHPDLENGNEFQLAGDPKFAIRTWISNPDPEKYNVVKQGDGIYGFHTRVNRNNESWDFTAGINRIVNSMVILQDKVGADTWLMKPEDQWEKSPNASGEWPEEGAYGTVRGTVWFENGDYAGSLANQWINDGNDVK…	hypothetical protein
NODE_125_length_3764_cov_68.290807	fig|1578.617.peg.181	1489	11	-	hypothetical protein		ttgccaccgtttatcaaaaacgacccatttgctaagtatgtttatccaaagaaatcaaacgactcacactggaagaatttacgcatagaaggtgcttacaaaattacactaggtggtggtatttactatggaacttacttaaaaaaggagccaatcgtcttaaaagagggtcgttttggtatcggaataggtacagatcaggcaatcgccaagcgtaaaaatgaatgccaaattttagataagttacagggaaagtactacccacttgttttgggatattttacgactcaaaacaactactatttgatcttacaaaaaattactggtcttacatattacgaatattttgcaacaaatggtccagtagttatcgaaaaaaatttatgtgaaaaatccatg…	MPPFIKNDPFAKYVYPKKSNDSHWKNLRIEGAYKITLGGGIYYGTYLKKEPIVLKEGRFGIGIGTDQAIAKRKNECQILDKLQGKYYPLVLGYFTTQNNYYLILQKITGLTYYEYFATNGPVVIEKNLCEKSMTDFIEVIKNLISVVAYAHRKGIILRDINPANVLVDIRTLKVYFIDCADSIFVDSHSCEKIKTPWYTIPETKYNTYAEDWIKVAWMILDGLGGVNRNLCLANYTQVRETFSKVIKYQGFSSKWIAIIEKLYTEKNESTKVIQFLDDPQLKKVKNMINPNKMLNQLHLIEDELNSYLLESLSQRDRTLLEKFSKEPSKIVSKFIKNELQSFICQDNMLYLKSGSVYSPYVNGGAAGRLYILVILATKFKLTELFPQLEKFLSKFSGRY…	hypothetical protein
NODE_125_length_3764_cov_68.290807	fig|1578.617.peg.182	2246	2100	-	hypothetical protein		gtgacctcacttgaaattgttttatttggcctaagtatcgtctttgggcagttactaggagcgagttggttagtttggtttcccgatgatttctttggccttgcattatttaacgccgtaacatttgctttaagtctttatttctaa	MTSLEIVLFGLSIVFGQLLGASWLVWFPDDFFGLALFNAVTFALSLYF	hypothetical protein
NODE_125_length_3764_cov_68.290807	fig|1578.617.peg.183	2485	2243	-	hypothetical protein		atgagcttaagggaattatcaaatattaagttattagtcgttttaaaagaaaagaagcatttacgtaatatgatctgtgccaacacgatcaatcacattggtagtgcactttataatgtagctatgtttactttaacatctaattggctaatattgtgtccgacagccttgatagttatattaataatatgttcatccctttttctagaacttggattgccccagatgaacgttgaagcgtga	MSLRELSNIKLLVVLKEKKHLRNMICANTINHIGSALYNVAMFTLTSNWLILCPTALIVILIICSSLFLELGLPQMNVEA	hypothetical protein
NODE_125_length_3764_cov_68.290807	fig|1578.617.peg.184	3763	2501	-	hypothetical protein		agggtgacaaatgctaaattgatcgttgttttacgaaaaaagaaacatgtgcgttatttgatatgtgccaagtttgtcaatcgtatcggaagtgcactatacaacttggctttattgactttagctgctaaacaaacatatagtactttagcgatcgcgcttgttaaattatttgaaaatttgcctggtttttttgatccaatattagcatatctgaccgaccgcgaaacacgaaggcttaagaaagcagcttggcttaacttgtttcaagtcttgatctattttatgatcgcttttttgatgctgcgcgtacaaatgccactagctttatttgtgctgatccttttttctaatgtggcatctgatagcattgatggctacatcagcaatatgtttgct…	RVTNAKLIVVLRKKKHVRYLICAKFVNRIGSALYNLALLTLAAKQTYSTLAIALVKLFENLPGFFDPILAYLTDRETRRLKKAAWLNLFQVLIYFMIAFLMLRVQMPLALFVLILFSNVASDSIDGYISNMFAPFSKTWIDHSERRAISSLDIVLFSLSLVLGQFLGAAWLTLFPGQFFSLSLLNALTFALGLFFIRKIKFDDTVKTLRTVKEHFSIKDFFKKMKLAYTHMQERHLLKIVWLLAESKMIYASYLLLLNVAMASNSELRFGSYAQTLAIWQFISFIGLILGSFLRISWLEKIKYDQIIILINITSFLAMISCFFELSLVNVLVLKLIGTLLSGYMAPRYYTDLIQQIDEEHLTRVESLNNFILLLAAPFGTLQATICLQLFGLRLTWLLE…	hypothetical protein
NODE_126_length_3708_cov_130.931973	fig|1578.617.peg.185	340	2382	+	Cyclic-di-AMP phosphodiesterase GdpP		ttgggaaaggaatgcggggataaaccagtgaaaaaattttttaacaaagatttttggcaactgcctgaattcatgtatgacagacatttgcgtgtgttagcttggatgctggcgcttgtagcggtcatttgtgtgatcctggcctttagaaccaatattattctaggatatatcagtatggtctttatgcttatcatgaccgtagttgcctatattactttaaaacaagttactgaagatacaactgaatacatttctgatctgtcttatcggatcaaacgcggtgaacaggatgcgttgatcaaaatgccgatcgggatcttattttacgacaaagaagggtatatcgaatggatcaacccttatatgcaacgctattttgataatcaagaagtgcta…	MGKECGDKPVKKFFNKDFWQLPEFMYDRHLRVLAWMLALVAVICVILAFRTNIILGYISMVFMLIMTVVAYITLKQVTEDTTEYISDLSYRIKRGEQDALIKMPIGILFYDKEGYIEWINPYMQRYFDNQEVLGKPLKEVDRQLYEQLEAKQDNKDKDIEVKLHGRAFSLMIQKDIDAVYLMDVTHYAQIRQEYEDTRLVIGQIFLDNYDEVTSAMNDKDISNLGNFVTNALADWAKEFGIYLKRVDEDHFFILTYAKTLKVLEEEKFKILDEVRKWTSKQNSPVTLSVGIAYGGSDLTQLAKLSQNNLDLALGRGGDQVVVKAVEGQARFYGGKTNPMEKRTRVRARMISQALTELMNQADQIFVMGHRHPDMDSLGACLGVRRIAAMNGKQCWIVLD…	Cyclic-di-AMP phosphodiesterase GdpP
NODE_126_length_3708_cov_130.931973	fig|1578.617.peg.186	2410	2859	+	LSU ribosomal protein L9p		atgaaaattatttttacacaagacgtacgcggtaaaggcaaacgcggtgaagttaaggaaattccggatggatacgcaaacttcttgatcaagagcaataaagctaagcaagctgatgcagcagcaatgagccaattgcgtggtcaaaagagagctgaagccaaaaaagaagccgaagaattagccgacgcaaaggtcctcaaagaaaaattagaatctggcaattatgtcgttgagatcaaggcaaaagctggtacagacgggcgtttatttggctcgatcacatccaagcagatcgcccaagccatggaaaaacaacacggcttaaagatcgacaagcgtaagatggaattagcagcgccgatccgtgcaatgggatacgctaacgtcccagtgaag…	MKIIFTQDVRGKGKRGEVKEIPDGYANFLIKSNKAKQADAAAMSQLRGQKRAEAKKEAEELADAKVLKEKLESGNYVVEIKAKAGTDGRLFGSITSKQIAQAMEKQHGLKIDKRKMELAAPIRAMGYANVPVKLHNEVSAKIRVHISEQ	LSU ribosomal protein L9p
NODE_127_length_3605_cov_72.777716	fig|1578.617.peg.187	1209	1	-	Acetylornithine deacetylase/Succinyl-diaminopimelate desuccinylase and related deacylases		atgaaagaaaatttacgtgaatttgcgttaaaacatttaccggactattttgagctgttgcgtttgcgttcgatctcagcccagcaaagagagatccccgagacggcagcgtatctggtgaaagtttttaatgagttaggggcagctcgggtggaaaaattagggagtccggaacatgcgccagctatctttgctgaatttactggcaatgatccgactaaaacgatcttgttttatcagcactatgatgttcagccaccagaacccttggagaaatgggaaagtgatccttttgaaccgacgatcagggaggaaaaactttatgccagaggagcttccgataataaaggcgagctgatctcacgcttagtcttagttaaatattttcaggcaaatggt…	MKENLREFALKHLPDYFELLRLRSISAQQREIPETAAYLVKVFNELGAARVEKLGSPEHAPAIFAEFTGNDPTKTILFYQHYDVQPPEPLEKWESDPFEPTIREEKLYARGASDNKGELISRLVLVKYFQANGGLPVNVKFFVEGEEEIGSLHVEQIVKENKAKLAADACIWEGGGKNYVDNYQIVGGMRGITVFDVETTTADIDLHSSLASYAENAAWRLVRGLATLRDDTGKVLVEGFYDDVQPLSKAEEEAVFAYDFDLDVAISRAGLRRTLKAEHKLALVNEPTMTINGLTAGYQGKGVKTVIPHMASAKLDCRLTPSQDPKKIAQLIQEHLDKNGFEDLKVRYRLGENGHRSPMSDPFIQLVLAKAKDYYGKQTKYLPNSAGGGPADVFSNELD…	Acetylornithine deacetylase/Succinyl-diaminopimelate desuccinylase and related deacylases
NODE_127_length_3605_cov_72.777716	fig|1578.617.peg.188	1506	1315	-	hypothetical protein		atgaaagctgacaaggagatattgtataacgtgatcggttatatcatttgtgatctgtttttgttttggtatttacctaatgatacttggcttgagatcggaataaacatagttataatgatcgttgtgatgtttggtgtatacatgattttagatgttattttgaaacgtccgcgagttaggaaaaattaa	MKADKEILYNVIGYIICDLFLFWYLPNDTWLEIGINIVIMIVVMFGVYMILDVILKRPRVRKN	hypothetical protein
NODE_127_length_3605_cov_72.777716	fig|1578.617.peg.189	1650	2087	+	Rrf2 family transcriptional regulator, group III		atgcagatctcaagccgtttcacgatcgctatgcacattttaacttatatcgctactgctccagcagaagaaaaagtgaccagtgagatcttagctgatagcgtccaagtcaatccggtgatcatccgcaatatattgtcgcagttaaagaaagcagacttgatcactgtcaaacgtgggcaaggtggcgcaacgatcattaagccgtttgaccaactgagtttatttgatgtctatcgagctgtcgatagcgttaaagatggagttctttttagttttcatgagaatcctaacccaaactgtcctgttgggcgtaacatccataacattttggatgataaattgcttcgcgtccaacaagcgatggaaaatgaactaaaagcgatcacattagctgaa…	MQISSRFTIAMHILTYIATAPAEEKVTSEILADSVQVNPVIIRNILSQLKKADLITVKRGQGGATIIKPFDQLSLFDVYRAVDSVKDGVLFSFHENPNPNCPVGRNIHNILDDKLLRVQQAMENELKAITLAEVLQDADKYLANK	Rrf2 family transcriptional regulator, group III
NODE_127_length_3605_cov_72.777716	fig|1578.617.peg.190	3590	2163	-	Efflux ABC transporter, permease/ATP-binding protein		ttgacgggacatagtgccctgtttgatgatagtgacttttttgatgatctagaagtattaaacgagggtgcaagttggcgtccggtgaatttgatcgtttttggagttgcgatcttgcgtgaagtggtgaccataagtgggatgttttggttgttaggaaaatataatgtgtggctcgcattacttttattgggcgttttggtgccacagacgctcgtttcgtatcggatccaacaggaagcctttgaaacgatggtgacacgaagcaagtatgcccgtaaattaaattacttgagttcgttattgttggcgcgagacgatgccaaggaagttcgtttattcgatatgttttcagcggtgatcacacgttatctgaaattatttaacttatcacaaaaa…	MTGHSALFDDSDFFDDLEVLNEGASWRPVNLIVFGVAILREVVTISGMFWLLGKYNVWLALLLLGVLVPQTLVSYRIQQEAFETMVTRSKYARKLNYLSSLLLARDDAKEVRLFDMFSAVITRYLKLFNLSQKNVDQIRRKQMFLALVFLSMTVAVSAGGFWWFIGQVQQKLLGIGVLLMYISVIAYLVEGMTRLVEDSSLLYDSLLWVKKYQRFLEFKEKQTDGTLEFKGDFKKLKLEHVSFTYPFSKVEVLHDLNLEFNAGEKIAIVGENGSGKSTLVKLLLRYYDPSKGQILLDETPLSMYQCASYRKYLSAAFQDFSRFKLSVAANISALKKGPISKIKACLARVGLTTLEADLQQNLSKEFDHGTELSGGQWQKIALARCLYKDSSLCFLDEPT…	Efflux ABC transporter, permease/ATP-binding protein
NODE_128_length_3593_cov_104.473034	fig|1578.617.peg.191	581	15	-	hypothetical protein		atgaaaaatacagagatgtgggaatatttttacctaatgaatgtaattattgggatcacttttggctattgtatctttttaaaggtagcgcttaaaagacgtagcctaaaagagaatatgctatacttttgtcttacggtcccagtactaacgttggtatatatatcttggggaaatgtgctagaacaatttatagaaataacattactatatttgatctatcgcaaaagaccaaaagatcatcaaactttaggccggttgctaattatcggttctatctcgtatatggtagagtctctaatggttttgatcacattttcttttgggatagaacatagtatagctcaaatgcttttttttgatatagtagcgtacatggtcatatatctaactagcatg…	MKNTEMWEYFYLMNVIIGITFGYCIFLKVALKRRSLKENMLYFCLTVPVLTLVYISWGNVLEQFIEITLLYLIYRKRPKDHQTLGRLLIIGSISYMVESLMVLITFSFGIEHSIAQMLFFDIVAYMVIYLTSMKTPIIRPLDRENGKVYFGLMVYIYMTFLGINYMVYFIKSEMVAFLILMLFLIKSI	hypothetical protein
NODE_128_length_3593_cov_104.473034	fig|1578.617.peg.192	1333	941	-	SSU ribosomal protein S9p (S16e)		ttggcacaagtacaatatcgcggcacaggtcgtcgtaaaaactcagttgcacgtgtgatcttggtaccaggtacaggtaagatcacaatgaacggcaaatctgcagaagaatatattccatttgcaaacttacgcgaagttatggctcaaccattcgttgccacagaaacaaaagaccaatatgacgtattggtaaacgttaacggtggtggcttctcaggtcaagctggcgctacacgtcatggtatcgcacgcgctttacttgaagtagatccagacttccgcggtgtcttgaaacgtgcaggtctcttgactcgtgatgcacgtatgaaagaacgtaagaagccaggtcttaagaaggctcgtaaagcttcacaattctcaaaacgttaa	MAQVQYRGTGRRKNSVARVILVPGTGKITMNGKSAEEYIPFANLREVMAQPFVATETKDQYDVLVNVNGGGFSGQAGATRHGIARALLEVDPDFRGVLKRAGLLTRDARMKERKKPGLKKARKASQFSKR	SSU ribosomal protein S9p S16e
NODE_128_length_3593_cov_104.473034	fig|1578.617.peg.193	1790	1347	-	LSU ribosomal protein L13p (L13Ae)		gtgcgtacaacatatattgcaaaaccaggcgaagtagaacgtaaatggtatgtcgtagatgcaacagatgttcctttgggacgcttatccacagtggtagcatctgttttacgcggcaagaacaagcctactttcacaccaaacgttgatacaggtgactttgtgatcgtcatcaatgcagaaaaagttgctttgacaggtcgtaaagcaacagataagatctattaccatcactcaaaccatccaggtggcttgaaggaacgtacagctggtgactaccgtgaaaaggatccagaaaaattgatcgcattatctgttaaaggtatgcttccaaagggtactcttggtcgtgcacaagctaagaagcttcacgtttaccgtggtgcagaacacaagcat…	MRTTYIAKPGEVERKWYVVDATDVPLGRLSTVVASVLRGKNKPTFTPNVDTGDFVIVINAEKVALTGRKATDKIYYHHSNHPGGLKERTAGDYREKDPEKLIALSVKGMLPKGTLGRAQAKKLHVYRGAEHKHAAQNPEVLDITNLI	LSU ribosomal protein L13p
NODE_128_length_3593_cov_104.473034	fig|1578.617.peg.194	2694	1942	-	tRNA pseudouridine(38-40) synthase (EC 5.4.99.12)	5.4.99.12	atgacgaagcgttatatgataactttagcctacgatggtactaattttgcaggctttcaagcccagccaaagcaacggaccgtgcaatcagtcctagaaaaagcactcaataagatgagtaagtttgacgactatatcacgatctatggctcgggtcgcactgattcgggtgttcatgctttggggcaagtcattcactttgattttccccatgatatctcaccagaagggatgctcaagggattaaattcgatgctgccccttgattgtgaggtcatcgactgcaagatcgtcagtgatgactttcatgcgcgttttactactcacggcaagcgctatatgtatcgcgtcagccgttcatggtttaccgatcctttcaaacgtttctacacgggacat…	MTKRYMITLAYDGTNFAGFQAQPKQRTVQSVLEKALNKMSKFDDYITIYGSGRTDSGVHALGQVIHFDFPHDISPEGMLKGLNSMLPLDCEVIDCKIVSDDFHARFTTHGKRYMYRVSRSWFTDPFKRFYTGHYKYPLDIKRIEEAMPDVVGTHDFSSFVASGSQTKDHVRTIYEATVREDKENNEVIFEFYGNGFLYNQVRIMVATLLEIGNGKRPVHDFLRLYEVKDRNECRETAPASGLYLKKVYYE	tRNA pseudouridine L13Ae
NODE_128_length_3593_cov_104.473034	fig|1578.617.peg.195	3498	2704	-	Transmembrane component of general energizing module of ECF transporters		atggataaactgttacttggacgttacattcaaggtgattctttggtccatcgccttgacccccgcgccaagatgatcttatgtttttactttgtcttgatcatctttttatgtaacaactggcaatcatatttactattagggatcgtgaccctgctcagtgtattactttcaaagatcgacttgagctattttgtcaaaggggtcatgccgttgatctggctgatcttgtttacggtccttttgcaggtcttttttacacgtggaggcccgacttattggcagtttggcccgtttaccttgtcacagtttggcttagtcaatggtttttatgtcttttgtcgttttgtgttgatcatttttatgtcgactcttttgactgtgacaacgacaccactt…	MDKLLLGRYIQGDSLVHRLDPRAKMILCFYFVLIIFLCNNWQSYLLLGIVTLLSVLLSKIDLSYFVKGVMPLIWLILFTVLLQVFFTRGGPTYWQFGPFTLSQFGLVNGFYVFCRFVLIIFMSTLLTVTTTPLAIADATESLMQPLKKLRVPVHEIALMLSIALRFVPTLMDETTKIMNAQRSRGVDFSEGSLISRIKAVIPLLIPLFVSALTRAEDLATAMEARGYRGEEGRSKYRVRVWHLQDTLALVFFFLVTLALIFLRN	Transmembrane component of general energizing module of ECF transporters
NODE_129_length_3558_cov_107.237730	fig|1578.617.peg.196	2311	263	-	Copper-translocating P-type ATPase (EC 3.6.3.4)	3.6.3.4	atgaataatgacaacaaatattcgtcccataatcaccatcaagtacatcatgctgggcatgatcacagcgggcacagtgggcacagtgggcacagcgggcacagtgggcatgaccaccatcatcacggaagctttaaggaacttttcttaaagtcattgccactaggaatcattattatgctcttatcccctatacatggatttaaactaccattccagtttacttttccatattatgatattgtagtagctattttatctactatattaattatttatggtggacgtccattctatcaaggttcagttgacgaatttaaacaaaaaaaacctggaatgatggcactcgtttctttaggtataagtgtttcatatttatacagtatttatgctgtgatc…	MNNDNKYSSHNHHQVHHAGHDHSGHSGHSGHSGHSGHDHHHHGSFKELFLKSLPLGIIIMLLSPIHGFKLPFQFTFPYYDIVVAILSTILIIYGGRPFYQGSVDEFKQKKPGMMALVSLGISVSYLYSIYAVIITYVTGEHVMDFFFEFASLLLIMLLGHWIEMKAIGEAGDAQAELAKLVPKDAHVVLEDDSIETRPVADLKVGDLIRVQAGENVPADGIIERGESRLNEALLTGESKAVKKGPGDEVIGGSTNGEGVLYIKVNETGDQSFISQVQTLISQAQSQPSRAENIAQKVAGWLFYIAVIVALIAFVVWMVIEDVPAAVIFTITTLVIACPHALGLAIPLVTARSTSLGASRGLLVKDRQALEIAQDADVMILDKTGTLTTGEFKVLDVKLL…	Copper-translocating P-type ATPase
NODE_129_length_3558_cov_107.237730	fig|1578.617.peg.197	2780	2331	-	Negative transcriptional regulator-copper transport operon		atgagcacaatagaatttaatactcatatcacagatgcagaatgggaagtcatgcgtgtagtttgggcaaatgatcgagtaactagtaaaaaagtcatttccgtattgcaagaaaaaatggactggacacaatccactatcaaaacgatcttaggtcgattagttggaaaaggcgtactaaatacagagcatgaaggtagaaagtttatttacactgctaatattgaagagacagaagccgtaagggattatgcagaagatatttttaaccgtatttgcaataagaaagtcggaaatgtaataggaagcatcattgaagatcatgttttaagcttcgatgatatagatcgactagaaaaaatattagagatgaaaaaatctttcgcagtagaagaagtg…	MSTIEFNTHITDAEWEVMRVVWANDRVTSKKVISVLQEKMDWTQSTIKTILGRLVGKGVLNTEHEGRKFIYTANIEETEAVRDYAEDIFNRICNKKVGNVIGSIIEDHVLSFDDIDRLEKILEMKKSFAVEEVDCNCPEGQCECHLHHH	Negative transcriptional regulator-copper transport operon
NODE_129_length_3558_cov_107.237730	fig|1578.617.peg.198	3084	3533	+	UPF0758 family protein		atgagaagaaagaagattagctttgttagacttaaacaggaaaagttatgtattaagggattggaggagctagaagcaaaaccaatctcttcaccctatgacattaaagatctaatgatgccattctttaaagacttagatagggaaatgatgttggtactcggtttagacacaaaaaataagccgactgtcattagtgtaatttcgatagggacattaaatcaggcgacagtttcaacaagagaaatttttaagacattgctattagcaaattcgatccgatttattattatccacaatcatccctcaggagacaccactccgtctgaaaatgatctgaaatttacgcgaaaaataaaggaggttggagagttgatggaagtgtatcttctagacagc…	MRRKKISFVRLKQEKLCIKGLEELEAKPISSPYDIKDLMMPFFKDLDREMMLVLGLDTKNKPTVISVISIGTLNQATVSTREIFKTLLLANSIRFIIIHNHPSGDTTPSENDLKFTRKIKEVGELMEVYLLDSIIYGDDLRSLRANDWR	UPF0758 family protein
NODE_12_length_27757_cov_125.141249	fig|1578.617.peg.199	2	628	+	hypothetical protein		ggaattgccaataagggcgagcttccatcaggtacgaagtttgactggaagacaccagtagatacaacgacaccaggagaaaaagaaggtacgatcgttgtgacgtatccagatggctcgactgatgagatcacagtgaagatcacagttacagctaacaagactgatgccgataagaacgaaccgatcactaagccgatcgaagttgttcaaggccaagtaccagatgctaaagatgcgatcgcaaacttaggcgatctgccagctggtactaaagtcgaatgggtcgaaatgccagatacttctaaagtaggcatgttcaaagcgttagtcaaagtaacgtatccagacggctcagttgacatcgttgaaacaacgatcacggtcaaagccaaagca…	GIANKGELPSGTKFDWKTPVDTTTPGEKEGTIVVTYPDGSTDEITVKITVTANKTDADKNEPITKPIEVVQGQVPDAKDAIANLGDLPAGTKVEWVEMPDTSKVGMFKALVKVTYPDGSVDIVETTITVKAKATAGGQTPSTPSQKTEAPVAPPTTNKQTLPNATKTELPQTGDSDDQKAKALGVALTGLAGLVGLGALKNKKKREEE	hypothetical protein
NODE_12_length_27757_cov_125.141249	fig|1578.617.peg.200	1227	754	-	Universal stress protein family		atggcacttaattatgaacgtgtattagtagcgatcgatggttctaagggttccgatgtcgcgttagaaactgcgatcgatgtaactaaaagaaatgaagctcatttagatattttacgtgtcttagacctcaattcactcgaatacggtggcgccgggatcgctttagatggggaacagatctatcggatcgaacaagaaaacgaagcttatttactcaaattgcgtgaagaactcattgaaaagcacggttttaagactgatcaggtcaatgtccacattcgttttggcaatcctaagatcgtgatcactgaagaatttcaacctgaatacaacatcgacatgatcatcgttggttcaactggcaagagcttcttgcaccgcatcgtgactggttct…	MALNYERVLVAIDGSKGSDVALETAIDVTKRNEAHLDILRVLDLNSLEYGGAGIALDGEQIYRIEQENEAYLLKLREELIEKHGFKTDQVNVHIRFGNPKIVITEEFQPEYNIDMIIVGSTGKSFLHRIVTGSVASHVTRAAKCDVLVARSTEENLK	Universal stress protein family
NODE_12_length_27757_cov_125.141249	fig|1578.617.peg.201	2187	1300	-	hypothetical protein		atggaaaaaactgaacgtaaagatctcaaaaagacactttgggtcggcctttcctgcttaatagcatttaatattgctattttacaagcacttagcatcttaaatccagaaaatcccgatgaaagtggcgtcccatacttttttgcagttgcagctgaattattcatcatctttgttgccacaaataaaaagactcaacgccaactttttgatgtttatcgccaaccaactgccgccaaattttttcaatgggtctgctttttaggtctgacacagatcattttcagctacaacagtaccttgatcgagatgcttttaaacttctttcatctgagtgctcaaaaccaagaagaaaatgctactggagctaatgaaacgctctcaatgtttatctatgga…	MEKTERKDLKKTLWVGLSCLIAFNIAILQALSILNPENPDESGVPYFFAVAAELFIIFVATNKKTQRQLFDVYRQPTAAKFFQWVCFLGLTQIIFSYNSTLIEMLLNFFHLSAQNQEENATGANETLSMFIYGSFLAPFGEEILFRGFLLQNFKRYGVRFAIIFSAILFGIYHGNIVQTPFAFILGLLLGYITVSYGLKYAIAVHIFNNMVLADFLDRFLQLFSENTATTISTIIMGSLALGGLYYLYRFWHTQRQKLFAPIDYSVIRSALFNLPFMILLVICLLEMLAGLTPLH	hypothetical protein
NODE_12_length_27757_cov_125.141249	fig|1578.617.peg.202	2991	2245	-	Deoxyadenosine kinase (EC 2.7.1.76) @ Deoxyguanosine kinase (EC 2.7.1.113)	2.7.1.76	ttgatcacactatcaggaatcatcggctctgggaagtcgagtttaaccgaaatcttagctcaagaattaggcactaaagcctattacgaacccgtcaaagacaaccctgttttacctatcttctacaaaggtaacgagatcgctgctaaaaagcgtgcagctggcgataaagaggcaactaacccatatgcctatctcttgcaaacattcttcttaaaccgccgttttgcaatgatcaaggctgctatgcaagaagacaacaacatcttggaccgctcgatctacgaagacgagatcttcatgaagatgaacaccgaaatgggtaacgcaactgaagtcgaatacgacatctacaagagcttactttcaaatatgatggaagaactaccatttgcatcc…	MITLSGIIGSGKSSLTEILAQELGTKAYYEPVKDNPVLPIFYKGNEIAAKKRAAGDKEATNPYAYLLQTFFLNRRFAMIKAAMQEDNNILDRSIYEDEIFMKMNTEMGNATEVEYDIYKSLLSNMMEELPFASHKKSPDLMITIKVSYDTMLKRIEKRGRDYELVERDPSLVEYYQRLLRHYDVWMEEYDSSPLLIIDGDKYDFVSSVADRIAVLEQIEEKLYELNKISKEQLADLKKQHLELLNEVG	Deoxyadenosine kinase
NODE_12_length_27757_cov_125.141249	fig|1578.617.peg.203	3212	3688	+	Nucleoside deoxyribosyltransferase (EC 2.4.2.6)	2.4.2.6	atgaaatctgtatatcttgcatcaccattttttagtccagctcaaaaagaacggatcgctaaagttaaagctgctttgagcaataataaaacgatcgatcccaaaaatatttttattcctcatgaacatgaatataaagcagctgaatttggcagctttgagtggcaaaaagctacttttggacttgatactaaccagatcgatgcgagcgatgtagtcgtagcgatcgtggactacaaattagaagagactaaagaaaacgaaccagactcagggacagcttttgagatcggttatgcttatgcgactaagacaccagtgatcgttgtgcaatttgatccggaaaaagaagtcaacttgatgatcgcccaaggtttgacagcttattttgatgttaca…	MKSVYLASPFFSPAQKERIAKVKAALSNNKTIDPKNIFIPHEHEYKAAEFGSFEWQKATFGLDTNQIDASDVVVAIVDYKLEETKENEPDSGTAFEIGYAYATKTPVIVVQFDPEKEVNLMIAQGLTAYFDVTKEGLAALEEYDFDELMPKFCPRPVI	Nucleoside deoxyribosyltransferase
NODE_12_length_27757_cov_125.141249	fig|1578.617.peg.204	3833	4060	+	hypothetical protein		atggagatcgacatcaaaggttacctacgtgaaaaggaattgactatttatgaggtatccaagaggtcgggttatggttatacgacccttcataaatcgtttaacaaacaacaaactcgtgcaacttccctaaacttgcgtgatcttgatgccttagctagggcacaacatgcaacgatgtggcaagttttgcaagagcttgaagaaaactatatgaattggaagtaa	MEIDIKGYLREKELTIYEVSKRSGYGYTTLHKSFNKQQTRATSLNLRDLDALARAQHATMWQVLQELEENYMNWK	hypothetical protein
NODE_12_length_27757_cov_125.141249	fig|1578.617.peg.205	4220	6364	+	ClpE-like protein		atggctagatatacagatccatttggagacatggacgacatctttaatcaattatggggtaacaatggtttaagttcagaaagtagccgttacatgatcaatggtcatgaagttacacctgaagaattcagacaatatcgtcaaacaggtcgcttgccaaatcaagctcaacaagctgctcaagctcaacaagctgcaatgcaacaacaagctggccaacaagaaggtagtgttttgcaaaagcttggtcgtaatttgacacaagatgcacgtgaaggaaagttagatccagttattggacgcaaaaaagagatccaagaagcagctgagatcctagcacgtcggacaaagaacaaccctgttttagttggggatgctggtgttggtaagacggctgtt…	MARYTDPFGDMDDIFNQLWGNNGLSSESSRYMINGHEVTPEEFRQYRQTGRLPNQAQQAAQAQQAAMQQQAGQQEGSVLQKLGRNLTQDAREGKLDPVIGRKKEIQEAAEILARRTKNNPVLVGDAGVGKTAVVEGLAQAIVNGDVPAAIKNKEIVSIDISSLEAGTQYRGSFEENIQNLVNEVKEAGNIILFFDEIHQILGAGSTGGDSGSKGLADILKPALSRGEISVIGATTQDEYRNTILKNAALARRFNEVVVNEPTPEDTLKILEGIRKLYEDHHNVVLSDDVLKAAVDFSVQYVPQRTLPDKAIDLVDMTAAHLASQHTVTDAKQIEAEIKKAKDEQQAAADKEDYEEALNVKAKIDELEAKLNSNSEAQKVTATVDDVAQSVERLTGIPVS…	ClpE-like protein
NODE_12_length_27757_cov_125.141249	fig|1578.617.peg.206	6467	7015	+	5-formyltetrahydrofolate cyclo-ligase (EC 6.3.3.2)	6.3.3.2	atgcagactaaaatagaatttcggaaacgccaattagaaaaattggcgaatgcaacactagaaactaacgcctctggaagcaagttagccgaaaaattatttgctacagacatgtggcaacaagcacagacagtcggactaacgctagcgggtgaaattgaagtaccgactgagttgataagtattcaggctaaacgtgaggggaaaaaagttttttatccgcgcacgttgccggggcgccagatggtctttttaccagcggatacaaaaaaagagcttgagatgagtaagtttggtgtcttagaacctagatatgatgctaaaaaaattcaaactgacatagatcttttgatcgttccggggatagcctacgctttagacagcaagatccgcttaggc…	MQTKIEFRKRQLEKLANATLETNASGSKLAEKLFATDMWQQAQTVGLTLAGEIEVPTELISIQAKREGKKVFYPRTLPGRQMVFLPADTKKELEMSKFGVLEPRYDAKKIQTDIDLLIVPGIAYALDSKIRLGFGGGYYDRYLKNFPGNTVSLVAPAMAYPTAQWPIDEFDVPLQNMITLTD	5-formyltetrahydrofolate cyclo-ligase
NODE_12_length_27757_cov_125.141249	fig|1578.617.peg.207	8550	7105	-	Glutamine ABC transporter, substrate-binding protein GlnH / Glutamine ABC transporter, permease protein GlnP		atgactaaaaaattattcggactcgtgagtttactctgtgcatgcctatttttctttagtttcagctctacagcgcatgcagaaaaaacttatcagatcggaacagatgttacttatccaccatttgaatttgccaataaagataataaatacgtcgggatcgatatcgaccttctaaaagcgatcgctaaagaagaaaatttcaaagtcgcgatcaagcccgtcggtttcaatgctgccgtccaatcactccaatcaggtcaattagatggtgttatggctgggatggcaatgactgatgagcgtaaagtaaaattcgatttttcagaaccatactacaaaactggttttgtcatggctgttgccaaagatagtaagatcactaaactcgaacaattg…	MTKKLFGLVSLLCACLFFFSFSSTAHAEKTYQIGTDVTYPPFEFANKDNKYVGIDIDLLKAIAKEENFKVAIKPVGFNAAVQSLQSGQLDGVMAGMAMTDERKVKFDFSEPYYKTGFVMAVAKDSKITKLEQLRGKRVAIKTGTAAGEYAISLKDKYGFTTVTFDDSDNMYNDVVNGNSVACFEDIPVMQYAIKTGTALKIVTKPAQGGYYGFAVMKGQNQELLKKFNAGLAKIKKNGEYQKIVDRYLSSKTVAAQKEAKKDGNSERTFLGLLKQNRQALLKGLGETLYLTIVGIICATIFGVILGLLGILPNKFAQGLSTTIIYIFRGLPLLVLALFIYNGLPSLTGVKIPAFVAGVITLMLNEGAYTAAFVKGGIEAVDKGQMEAARSLGLPFGTAM…	Glutamine ABC transporter, substrate-binding protein GlnH / Glutamine ABC transporter, permease protein GlnP
NODE_12_length_27757_cov_125.141249	fig|1578.617.peg.208	8712	9467	+	NADPH-dependent FMN reductase		gtgaagatcataggaattgcaggttgctataagcgtgacgggatcacaaagcagatgttagatcaagttttagccaatgttggccctgaaaatgaagttgaacaggtctttttattggactataagatctatccgggaagtcctgaattagctaagctcgttgaaaaattaaagcaagccgatgtttgggtcttagcggctccgacctattggggggcgttatcgggcgtgatgaagaattttttagattgtttacgtcaattgaccttgcgttttgatgaaaatggtgacccgcatccgcttgagacttttttgcataaacactatgttttattgacgaattgctatactaagacttgggaaaacatgttcactggaacgactgatgcagctttgcgc…	MKIIGIAGCYKRDGITKQMLDQVLANVGPENEVEQVFLLDYKIYPGSPELAKLVEKLKQADVWVLAAPTYWGALSGVMKNFLDCLRQLTLRFDENGDPHPLETFLHKHYVLLTNCYTKTWENMFTGTTDAALRTMDKVMTTLGLIKAGEAVQTNTYFLTTLPAKKQVELSHLGQKAGTLQRKDDQTVKRYIELFFIVAVMAFITMLIQTGVLHLLGQTLGFWNNYISFVVIFFILLSITLHFFTVVKHKRK	NADPH-dependent FMN reductase
NODE_12_length_27757_cov_125.141249	fig|1578.617.peg.209	10534	9512	-	Branched-chain amino acid aminotransferase (EC 2.6.1.42)	2.6.1.42	atgactgatctagttgatcttgactgggaaaatttagggttcgactacatggagctaccctatcgttatcgagcacattataaggatggccagtggcacaaagctggcttgactgaggacgcaacgatcgcgatcaatgaaggctcacctgtctttcattatggtcaagctgcatttgaaggcttaaaagcgtatcgttgtaaagatggtagcatcaatcttttccggcccgatcaaaatgcagcgcggttacaacgaagctgccaacgtttattgatgccagaagtgccgacagagatgttcatcgacgctctaaagcaagtggtaaaggcaaatgaagcctatgttcctccatatggttcaggtggcaccctttacttacgtccaaatatcatcggg…	MTDLVDLDWENLGFDYMELPYRYRAHYKDGQWHKAGLTEDATIAINEGSPVFHYGQAAFEGLKAYRCKDGSINLFRPDQNAARLQRSCQRLLMPEVPTEMFIDALKQVVKANEAYVPPYGSGGTLYLRPNIIGVGPNIGVHPASEYIFTVFAMPVGNYFKGGLQPTNFLAANYDRAAHKGTGQSKVGGNYAASLLPGAEAKKQGFSDCIYLDPLEHKKIEEVGSANFFGITNDNKFVTPSSPSILPSITKYSLLYLAKERLGMETEETDIYLDDLDHLVEAGACGTAAVISPIGGFQIGDKLHVFYSETKVGPVTKKLYDELTGIQFGDKKAPEGWIVKV	Branched-chain amino acid aminotransferase
NODE_12_length_27757_cov_125.141249	fig|1578.617.peg.210	10940	10629	-	hypothetical protein		ttgggggatcgttgtgcgcaaaacacaccggctcgcaacgaacttaaaacttggctcaaagtgctccctactagtaccaatattttaggtaccagcaatctcttaggcaatgttacgactttagcaagacaaagtgacttttgcctaatatgtgttaaaggtgcctttgagatttttgatacctctgaacttgtctttatcctctttgctctacttcgtcacagtaaacacattttagcgtggcgtaaaaatgtcaaattatcactcacagcccaagagtttatcgagtttgttaaaaataataagctttaa	MGDRCAQNTPARNELKTWLKVLPTSTNILGTSNLLGNVTTLARQSDFCLICVKGAFEIFDTSELVFILFALLRHSKHILAWRKNVKLSLTAQEFIEFVKNNKL	hypothetical protein
NODE_12_length_27757_cov_125.141249	fig|1578.617.peg.211	10987	11217	+	4-carboxymuconolactone decarboxylase (EC 4.1.1.44)	4.1.1.44	atggtagaaaaacaaacagctggtcgggataacctgggaaattttgcgcctaagtttgcccaattaaatgatgatgttttatttggtgaagtttggtcacgagaagacaaactatcggcccatgaccgcagtgtgatcaccttagccgctttgatctcaggagtatatagcgtagatgcattacggtcgttttttgtcagtggcccttttttgtttgcgccgtttagctaa	MVEKQTAGRDNLGNFAPKFAQLNDDVLFGEVWSREDKLSAHDRSVITLAALISGVYSVDALRSFFVSGPFLFAPFS	4-carboxymuconolactone decarboxylase
NODE_12_length_27757_cov_125.141249	fig|1578.617.peg.212	11510	12277	+	FIG053235: Diacylglucosamine hydrolase like		ttgatcgatctgcaagatattttggcaaaaatgaatctaaaccaaaagatcaattacgataaagtcatgatgaagatggtctcgacatggcaaaaagaccaaattcgccccaagatcttactgcactcctgttgtgctccatgtagtacgacgacacttgagcgcatgacagaatttgcggatgtgacgatctattttgctaattcaaatattcacccccgggcggagtaccaacggcgtgaatatgtccaacaaaaatttatccatgatttcaacgaaaagaccggaaataacgtgcaatttgtggccgctccgtataaaccccaagaatatttccaagcagtacgtgggttagaaaaagagcctgaaggtggcgatcgctgtaaagcttgttttgac…	MIDLQDILAKMNLNQKINYDKVMMKMVSTWQKDQIRPKILLHSCCAPCSTTTLERMTEFADVTIYFANSNIHPRAEYQRREYVQQKFIHDFNEKTGNNVQFVAAPYKPQEYFQAVRGLEKEPEGGDRCKACFDYRLDMVAKKAVELGFDYFGSALTISPHKNSQTINSVGIEIQRFYDVNYLPSDFKKGNGYRRSVEMCKEYDIYRQCYCGCIFAAKQQGVDLSQTRRDALEFMEGKNGTEEFPEIIFQINGEEV	FIG053235: Diacylglucosamine hydrolase like
NODE_12_length_27757_cov_125.141249	fig|1578.617.peg.213	13320	12481	-	hypothetical protein		atgaaggctagacatcaatcggtgaaatattttgcagtcaaatatacggaattttttgtccgtaacggtctgatctacttgcccttgctggtttttatcttcattcttcccaatttttggacacttttacttttcctgggttatactagctcgctcattgcgatttttttacgctatttcactaccacctaccgcattgaggctgatactttgacgctcacaactggggtcattgcaaaaacaacgctcaaactcaaacaagctgagctcagccacacgctttcaaacttccgcgtcgaacagactatctatcaaaaattctttcgcacgcaaggtatccagatctatctcaacaacagtaccaccgaagaagcaattgagttttttgctttgacccct…	MKARHQSVKYFAVKYTEFFVRNGLIYLPLLVFIFILPNFWTLLLFLGYTSSLIAIFLRYFTTTYRIEADTLTLTTGVIAKTTLKLKQAELSHTLSNFRVEQTIYQKFFRTQGIQIYLNNSTTEEAIEFFALTPEQLAQLQEFLAAFQPTTEIVAENKASLIEKSQADFLTIVRTGLISTRYLAYLALVLQLEEQFPQLQRFFDLTALWFWAVLVSGALFFSLAYHYISFAKFSLWETEHNFVVKLSWVDSSISSSQIGFSRILRVRLIHHFFPLLDKTT	hypothetical protein
NODE_12_length_27757_cov_125.141249	fig|1578.617.peg.214	13744	13310	-	hypothetical protein		atgcaaacctttactgttgccaaacaatacttgtattataggttctcattagcttttatcacttacacactgctgcttttactgggatattttttactccaacacttcgatcatggcaattattttcgactcaccttatttttttggagtattgtttttgttttagattgtctacgtggctttttttattggaaatatgctcgactcagttttagttctacagccgtcatcgttaccaaaggccgtttcttttactcaaaaactacgatcccgcttgaaaagatatatattgtttcagaaagtacaaatgtctacttacaacttttcaaattaaaaagactaaattttcaaacgatcgcacaggcagctagttttgccgggatcactgaagacttccag…	MQTFTVAKQYLYYRFSLAFITYTLLLLLGYFLLQHFDHGNYFRLTLFFWSIVFVLDCLRGFFYWKYARLSFSSTAVIVTKGRFFYSKTTIPLEKIYIVSESTNVYLQLFKLKRLNFQTIAQAASFAGITEDFQLPVKVGGRDEG	hypothetical protein
NODE_12_length_27757_cov_125.141249	fig|1578.617.peg.215	14113	13877	-	hypothetical protein		atggttaaatttagacgtgttcgtgcgtttgacactgaaaacttggctaaagatatgactatcgtaaaaaaggatattcaaatctctggtcataagatcaaaaatgtgccagttcagcttgaagattcgcagtctgaagatattagttaccttatttcagaccctatctttaaacatctatattcgattattcgaagaagcactgaaggtgttgaattcgactttgacaagctctaa	MVKFRRVRAFDTENLAKDMTIVKKDIQISGHKIKNVPVQLEDSQSEDISYLISDPIFKHLYSIIRRSTEGVEFDFDKL	hypothetical protein
NODE_12_length_27757_cov_125.141249	fig|1578.617.peg.216	14683	14342	-	hypothetical protein		atgttacatctaataccaaatgatctgccccaagcactcgaaaagttagcttggctaaaagcaaatggctataacacagctaccagagaaagtgtcatcaacgacatgacgcaagatggtgtccaagatatgctcgacacagcacttgagggtccatattgggggaccgcgtggaaaaagcccgatatgatcttaacgattacgggaagtctgggagaagagatcgccaaagtttatccgcgaaaaggatttgagaccttttcacaagatctagcagataatgatctgctctactggcgtaatttatcggctcaagtcagtggagcgatcggcaacgattaa	MLHLIPNDLPQALEKLAWLKANGYNTATRESVINDMTQDGVQDMLDTALEGPYWGTAWKKPDMILTITGSLGEEIAKVYPRKGFETFSQDLADNDLLYWRNLSAQVSGAIGND	hypothetical protein
NODE_12_length_27757_cov_125.141249	fig|1578.617.peg.217	14815	15537	+	Nudix-related transcriptional regulator NrtR		atgaagatcaatagaacatttatcccatttgaggtaaagttgctcaatatcatttggtgttttgatcgcaagaccaaccaagtgaaggtgatattaaaagatgagggtgactggaccttacctgaaacttatcttatccaggatgaggatgcccttgatgcgacgatcagattgacacatgagttgacgggacagactgtgtcacctaaaaatattgaacaattagagacattgactaatcctaagcgagtagttgatggaaaacgcttagtgacaatggtctatatgacttatctaccggagtttccggagatgatgacttcgaccttggaactatttaccttagaaaacttaaatagccactattatttcactaaaggtgagaaacaattagcggtg…	MKINRTFIPFEVKLLNIIWCFDRKTNQVKVILKDEGDWTLPETYLIQDEDALDATIRLTHELTGQTVSPKNIEQLETLTNPKRVVDGKRLVTMVYMTYLPEFPEMMTSTLELFTLENLNSHYYFTKGEKQLAVATVDTEAEYYQKRLRKNKFYQVNDYVLKKACLRIRHSLDTQPDILRILGEAFTLREARSLYAPFLGVSFHEIDNSNFKKTHQRLFREIGKANKRGPGRPASLYRLRF	Nudix-related transcriptional regulator NrtR
NODE_12_length_27757_cov_125.141249	fig|1578.617.peg.218	16604	15597	-	hypothetical protein		atgaaagttcacatgactaacattcacgggatgactaaaaatagtgtcgctcaaatagcccaaaatatgacatctcagtttggaaaacaactggggtttaatgagatcggcatttacaactatcctattagtgttgatagcccaactgaacttagtaagcgatttgacggtatggtcgcttctgtaagcaataatgatatcgtcatctatcaagcgccatcttggaatacgatcgagtttgatcacgcctttgttgatcatctcaaacgctattctaagttgaaattgatcatctttatccatgatgttacgccactgatgtttgctggaaatcgctacttgctaccaacgtttatcgatttttaccaaaaagccgaccttttgatcgtaccttctgaa…	MKVHMTNIHGMTKNSVAQIAQNMTSQFGKQLGFNEIGIYNYPISVDSPTELSKRFDGMVASVSNNDIVIYQAPSWNTIEFDHAFVDHLKRYSKLKLIIFIHDVTPLMFAGNRYLLPTFIDFYQKADLLIVPSEQMYLFLRENGLAEKKYVVQHMWDHPLDANMLYDTTEIKRLNFAGDPTKFTFVQDWQHDTPLHLFASKKPTATDLNLIYEGWLNDAELCIKLSKNGGFGLVWNDGGYTQEYTSKYISYKLGTYLAAGLPVIIPRGISNEELISKNNLGFAVDSITEALEKLERLTQEEYLQYKNAVKEFAPLLQQGYFTKQALVQAVFEVLQA	hypothetical protein
NODE_12_length_27757_cov_125.141249	fig|1578.617.peg.219	17082	16648	-	hypothetical protein		atggaaccacgaatcgataaattagtttcaatttttaatcacaaattgcgcactgaactcaattttcaatatgaaaagatcggtctcagtgataaaaattatttttatctcgaaaagatcgccgagactcctgggatcagtcaagctcaattcatcaagatattacaccgtgatcaaagcgttgttacccgccagatcaataaattagtggccgatggttggatcagcaaacgtttttccgataaggaccatcgccgctcagaattatttttgacttctaaaggtgaagctatcttacctaagatcaaagatatctatcgccaggtcaatcaaaattcgctagctagtttgactgcaagtgaagctaaaatatttggtgacttactagataaagtgacc…	MEPRIDKLVSIFNHKLRTELNFQYEKIGLSDKNYFYLEKIAETPGISQAQFIKILHRDQSVVTRQINKLVADGWISKRFSDKDHRRSELFLTSKGEAILPKIKDIYRQVNQNSLASLTASEAKIFGDLLDKVTIAYQPHNSTEV	hypothetical protein
NODE_12_length_27757_cov_125.141249	fig|1578.617.peg.220	18443	17085	-	Uncharacterized MFS-type transporter		atggataacatttctaaaacgatcgatcctaagatccgcctgatcgttactatactacttttattttctggctttgtcagtctagctagtcaaacgatgatgatcactgcactacccgtcatcgaacatgagatgaatgtctcattgactctagttcaatggctcacaacagggtacactttgatgatcggggtcatcacgccactttcatctaatttgtatgaaaaattcaaaaagcgcaatatctttttggctacgatcgcgatctttatcttagggactttgatcgggtgctttgccactgatttttggctcttgctactcgcccgcttggtccaagcatgtgctagtgggatcttgatgtcatttcaaatgacaacgatgatctcgatctacccc…	MDNISKTIDPKIRLIVTILLLFSGFVSLASQTMMITALPVIEHEMNVSLTLVQWLTTGYTLMIGVITPLSSNLYEKFKKRNIFLATIAIFILGTLIGCFATDFWLLLLARLVQACASGILMSFQMTTMISIYPIKKRGTILGMSGLVIAFGPAIGPTLSGLIVNTLGWRYIFILVLPMMLLVWLIGFFAFPNFSEPKDIKIDFISVGLSLLGSGLTLASLTFFQTSALQAWIMLVLGLAILFIFVKRQLRLKQPMLKVQLVKNRSFRLMTLVGICAFMVLLGTEQMLPIFTQNVLHLNSMVSGMILLPGAIANALSAALVGRLYDKHGPKYLIISGGILMLIAAIPFVMISETTPVWLLTVAYMLRMIGNALVFSPAMSEAFVDVLPDEVSHATALNNS…	Uncharacterized MFS-type transporter
NODE_12_length_27757_cov_125.141249	fig|1578.617.peg.221	19130	19396	+	ACT domain protein		atgaaagctatattaactgttgttggtcaagataaggtcgggatcgttgctgaagtcagtcgctttttggctgaacaaggtatcaatatcctcgatattagtcaaactattttagaaggccattttactatgatgatggcagtccaagttccagaacaaagcgatctgcaacttatctcagctaaacttgctgaattggggcagaccttgaaagttgagatcaatttgcgcaatgaagaagtttatcgcgcaatgcatcaactatag	MKAILTVVGQDKVGIVAEVSRFLAEQGINILDISQTILEGHFTMMMAVQVPEQSDLQLISAKLAELGQTLKVEINLRNEEVYRAMHQL	ACT domain protein
NODE_12_length_27757_cov_125.141249	fig|1578.617.peg.222	19408	20751	+	FIG00519347: Ribonucleotide reductase-like protein		atggaatttgataagattttagaaacgatccacatgatatctgaccaaaatctcgatgttcgcaccgttaccatggggatctccttgctggattgcattgatagcgacagtgatgtggcttgccaaaagatctacgataagatcacgactaaagctaaagatctagtcaagacagctgagcagatcgagatggaatatgggatcccgatcgtcaataaacgcgtggcggtgacaccgatcgctttagttgcaggggctagccaagataaagattatgtcaaatacgctaaaactttggataaggcggctcaaacattggggatcgattttatcggtggcttttccgcacttgttcaaaaagggatgactaaaggagacaaaaccttgatcgcctcatta…	MEFDKILETIHMISDQNLDVRTVTMGISLLDCIDSDSDVACQKIYDKITTKAKDLVKTAEQIEMEYGIPIVNKRVAVTPIALVAGASQDKDYVKYAKTLDKAAQTLGIDFIGGFSALVQKGMTKGDKTLIASLPEALAQTNLVCASVNVGSSKSGINMDAVKQMGEVITTAAKLDYMTNAKLVVFCNAVEDNPFMAGGFHGVSEPDVVINVGVSGPGVVKAALEHVKGQPLDQVAETIKQTAFKVTRMGQLVGSVAAKRLNVPFGIVDLSLAPTPAVGDSVAQILEEIGLAQVGTHGTTAALAMLNDAVKKGGIMACSHVGGLSGAFIPVSEDAGMIAAVEARTLSLDKLEAMTAVCSVGLDMIALPGDIPATTVSAMIADEAAIGMINNKTTAVRVIP…	FIG00519347: Ribonucleotide reductase-like protein
NODE_12_length_27757_cov_125.141249	fig|1578.617.peg.223	20926	21681	+	Transcriptional repressor of the fructose operon, DeoR family		atgaaagtgcttgcagaggaaagacaacagcatattttgcagatgttaaaggaaaataatgtcgttaaaattaaagagatccgcaaacaaactaattgttctgagtcatcggctcggcgcgatcttcagcttttggaagaaaagggcttgttgatccgggtgcatggtggtgccaagatcaagcattcgctccaacgtgaacttgatatgagtggcaaagcatcgaagaatacggctcaaaaagaggcgatcgcccaagcagctgcaaagttagtcgaagctgaagatgtgatctacttggacgcgggaacgacgactttagcgatgatcccatatttaaataagccaaaactgacggttgtgactaatggagttatgcatgcttcgctattagctgat…	MKVLAEERQQHILQMLKENNVVKIKEIRKQTNCSESSARRDLQLLEEKGLLIRVHGGAKIKHSLQRELDMSGKASKNTAQKEAIAQAAAKLVEAEDVIYLDAGTTTLAMIPYLNKPKLTVVTNGVMHASLLADQNVRTILVGGELKNTTKAIIGVKAVSSLTQLRFNKAFLGINGIHPRYGFTTPDPDEAAVKTTALEQSEECFVLADPSKFDNVSFVKVAELSQATIITSSLSQPVRARYCEQTTIQEDF	Transcriptional repressor of the fructose operon, DeoR family
NODE_12_length_27757_cov_125.141249	fig|1578.617.peg.224	21681	22595	+	1-phosphofructokinase (EC 2.7.1.56)	2.7.1.56	atgatttatacagtaactgtcaacccttcgatcgactatatcgtccagttaaatgaactaactttaggcgaagtcaaccgaatggattacgacaataaattacctgggggcaaagggatcaatgtttcccgtatcttgaaagaacttggcttggataatacagcttggggctttttaggtggttttaccggtgaatttgttaaagaaactttagaaaagacaggacttaagacgaactttactccgatcaaagctgatacgcggatcaacgttaagatcaaagcccaagcagaaactgagatcaacggccgtggacctgaattgactaaagaagagatcgcagcttttacagcgcaattcgataaattgaccgctgatgacgtggtgatctttgccggg…	MIYTVTVNPSIDYIVQLNELTLGEVNRMDYDNKLPGGKGINVSRILKELGLDNTAWGFLGGFTGEFVKETLEKTGLKTNFTPIKADTRINVKIKAQAETEINGRGPELTKEEIAAFTAQFDKLTADDVVIFAGSLVPSLSDDFYFDLIKVIRQKGAQFVIDTTGESLLKTLPENPLVIKPNNHELAELFGVELNSIDDIVKYGKKLLEMGAKHVLISMAGDGGLMITKDKVYRSYAPKGTVINSVGAGDSMIGGFTGTYAKTKDPLEAFRYGLACGSATAFSEDLADAKKINEILPMIEIEEYK	1-phosphofructokinase
NODE_12_length_27757_cov_125.141249	fig|1578.617.peg.225	22616	24574	+	PTS system, fructose-specific IIA component (EC 2.7.1.202) / PTS system, fructose-specific IIB component (EC 2.7.1.202) / PTS system, fructose-specific IIC component	2.7.1.202	atggacattcgtgacttattgatgaccgaccttatgatcatggatcttaaggctacgaccaaaaatgaagttatcgatgaaatggtgcataacttatttgttaaaggcatcatcgacgacgaagaattatataaaaaagatatcttaaaacgtgaagctgaaagctcaactggtatgggtgaagggatcgcgatcccacatgctcacgatacagcagttaagaaaccagctgtaatgtttgcgcgcagtgttaatggggtcgattaccgatcaatggacggccaaccagcgcacttattctttatgatcgcagctccagaaggtggagataatacccacttacaagctttagcagctttatcccaagttttgatgaacccagatgtagtcaatgctttg…	MDIRDLLMTDLMIMDLKATTKNEVIDEMVHNLFVKGIIDDEELYKKDILKREAESSTGMGEGIAIPHAHDTAVKKPAVMFARSVNGVDYRSMDGQPAHLFFMIAAPEGGDNTHLQALAALSQVLMNPDVVNALKAADTPQKVQDIFAKAVAQKEAENKAQEEREKAAANKPADDSRPYIVAVTACPNGIAHTYMAEENLKKQADKMGVDIKVETNGSEGIKHRLTADEIKRAKGVIVAADKKVEMARFDGKNLVNKPVTDAIKDPEKLINEVLEAKAPVFHASANDATEESDSTGSVWGDIYKQLMNGISHMLPFVIGGGILMAVSFIVEQYMGGAKSPAFIFLNNAGNMAFAFMVPVLAAYIAEAIGDRPALMPGFVGGFMATVYSGSFGGAYTANVM…	PTS system, fructose-specific IIA component
NODE_12_length_27757_cov_125.141249	fig|1578.617.peg.226	24725	27733	+	Phosphoglycerol transferase and related proteins, alkaline phosphatase superfamily		atgactaaagatgagatatattctgtacaggataaaaagaaaggaataagtagatttaaagtagatctacttatttatggattgatagtgttgactgcatttagcagtttatattggcagcatgctccccagatctttttgcaagaaacactcagtaaaaagtatttgatagccaatgtaatacgtggattttcagtgacaagtataccgatcatgcttcttttacttggatattttatgacaaggatcagaaaaatcggtatttttcaagcttggggttttttagttatcggaacctggtgctgcttgttagtagtatgttttttgcaagattcgacatggatcgggcatttttataatgcactttttccattcttacgcaatacctcgccattattt…	MTKDEIYSVQDKKKGISRFKVDLLIYGLIVLTAFSSLYWQHAPQIFLQETLSKKYLIANVIRGFSVTSIPIMLLLLGYFMTRIRKIGIFQAWGFLVIGTWCCLLVVCFLQDSTWIGHFYNALFPFLRNTSPLFSGILLAILTNKIVAERLMNNRYAYYIFFFIAFGVPTIFGKDIFNYNGGTTALYAWMVFTLGANLPDSELPKKAWYFLTSVSAIVLAIMLVIMPLISEGTHGDLSTATRLTDAANLFTMLFSFYLVRLLLPLRLNRVQLFSLLGSVLFSVSSFLIEALNTANEKATWGIRYLELSEAILVSLVIWSVVHIYVKSKFFIKLSKLDKMLDSWHLADLENNIKLTLVKTKRSLRSHKLMLIVSGVMLVLSYISMVVTNVGGHVADTIEGD…	Phosphoglycerol transferase and related proteins, alkaline phosphatase superfamily
NODE_130_length_3548_cov_117.599716	fig|1578.617.peg.227	174	656	+	hypothetical protein		atgaaaggatcattcaaaccattactctttgttgcaaccgtcttttgtttgttgtttttaaccgatttttccgttcacgctgctagtgtccctgttcctgactcgcttacctctggtgaagtacaattagatgatcacgatcatgtcgtttttgcctcatcgatggcgttagttgaacaaaatgagccaaaatcacagaccttgaccgataaacaagcactcttcgctcgtctctcaaatgctaactttactgcagtcaatatgccaaatagtcggtgggtctattattccgatcaccataactactttaataactataagtggggacattctaattactttaatagtgtagttagacattccgccactgcttgggtcggaaatgaccatgaaaaagtt…	MKGSFKPLLFVATVFCLLFLTDFSVHAASVPVPDSLTSGEVQLDDHDHVVFASSMALVEQNEPKSQTLTDKQALFARLSNANFTAVNMPNSRWVYYSDHHNYFNNYKWGHSNYFNSVVRHSATAWVGNDHEKVVKDANYWAFAVAKGHGTFKAFYNNLPY	hypothetical protein
NODE_130_length_3548_cov_117.599716	fig|1578.617.peg.228	767	2851	+	hypothetical protein		atgaaaaataaaaatttatttttagtcgctatttttttacttagttttattctaaatggtcttactgtgtatgctaataattatcgatcagaagcttctttagccttaaaacagcttgatacttctaaatattttatcgcttttaagcttccagttgctccccacaccaaaaaacagttccaacagatcatcgctacccttaataactgtgcccaaaaaatggaactaaattacatggaaaagcacgcttacatgggacatgtacttcgagatgggaaaattgattatgctagaagttttgaagaacagaatttttatgtttataaactacaccaaacgcattttttaggaaattttggtgctttaggtacagataaggccgaatattcttatcattat…	MKNKNLFLVAIFLLSFILNGLTVYANNYRSEASLALKQLDTSKYFIAFKLPVAPHTKKQFQQIIATLNNCAQKMELNYMEKHAYMGHVLRDGKIDYARSFEEQNFYVYKLHQTHFLGNFGALGTDKAEYSYHYPMLKGYQVTIQPLKQVFTSRKNFEGIFFLETLDQEKYVTFLTLLNQDLNLAFKTHYTLNDYQITRQTELLLPSFEIDPSLKPISNYLLIFIVIALLIYFLLEWSQLRLCKLNGWSFSRSFFALASKPLAVLLLSISGDLWALYKKLNLTELLFKQLIGFLIVFCVIYLVMLTMYWVSLNNIKEHYFSTILFLLLSAVKVLLLTTLISSFAPIGSLLIDGYNTFSHTPTTASHKYAEFFPYVIGNNPVDDESNYEDLKNIYQIADHQ…	hypothetical protein
NODE_130_length_3548_cov_117.599716	fig|1578.617.peg.229	2841	3482	+	hypothetical protein		atgtcaaatgatctcatctgtgtaacggatctgactaaaaaattcaaaaagaagtgcgttttttcagatctttgtgtaaattttccgaaaaatcagatcactgtgatctacggtaaaagtggttctggtaaatcaacgctcttaaagatcttaggcgcgatcgaaaactatcaaggtggtaatgtctattttaatgggcaaaaactccccaaagttgggcgccacaaagccactttatatcggcgcaaaaatgtcagtttcatctttcaagactatggtttgatcaaagaagctacgatcaaagctaatttagaacttggagttgcttatagtaaactcaaacatcgtgaaaaactcaataagatgcaagcagctttggcagaagtcggtttaaattat…	MSNDLICVTDLTKKFKKKCVFSDLCVNFPKNQITVIYGKSGSGKSTLLKILGAIENYQGGNVYFNGQKLPKVGRHKATLYRRKNVSFIFQDYGLIKEATIKANLELGVAYSKLKHREKLNKMQAALAEVGLNYSLKTKVAVLSGGEQQRVAIARALLKPGELILADEPTGSLDLENRSLVFSLLQKLKEKGKTIIMVSHDPYFEQVCDHIVRL	hypothetical protein
NODE_131_length_3534_cov_60.057412	fig|1578.617.peg.230	945	808	-	hypothetical protein		gtgccatttgtaatttcaataaatttgagaaaagagacccttacacacgtagggacagttttcacgcataatgaaaaaataaatgatcttacaaaaaaggagaaggaagaattaatgaagatattgatgagcttataa	MPFVISINLRKETLTHVGTVFTHNEKINDLTKKEKEELMKILMSL	hypothetical protein
NODE_131_length_3534_cov_60.057412	fig|1578.617.peg.231	1354	1202	-	hypothetical protein		atgggcacagcgttagcaattgctttacttataatttctagcattgtgatacatgggatctttcattacgctcttgctatagtctttggctataaaccaaaactttatttttcaagttatttaattcctacagtaatatatgacttgatttga	MGTALAIALLIISSIVIHGIFHYALAIVFGYKPKLYFSSYLIPTVIYDLI	hypothetical protein
NODE_131_length_3534_cov_60.057412	fig|1578.617.peg.232	1620	1354	-	hypothetical protein		atgaataaagagattttaaagaaaagtttcgtcaacggttcatttttgtttatagctttacttatcgtggattttattattgagttatttcaaataaatgaaagtggaacggtcgttaccttcttgggaataaaaataattacacacatgactagtaaagaactcactactagcataggtatcactattggtattcttttttggtatgtaattacaattattatttgttatggaggagccttgatagtatctaggactaagaaataa	MNKEILKKSFVNGSFLFIALLIVDFIIELFQINESGTVVTFLGIKIITHMTSKELTTSIGITIGILFWYVITIIICYGGALIVSRTKK	hypothetical protein
NODE_131_length_3534_cov_60.057412	fig|1578.617.peg.233	2992	1613	-	hypothetical protein		atgataaaacaaaatatattaagcaactctttgactctctttaaattttatgtgaatgacgcactacgtggctttcttgatcgaccaattttcaaaaataagactattcgtgttggtatgattttaataactatcgctctctacttttggtatttttatataaatatccgtgccttttttggactaggagaaattaaaaatttacccgaagtggtttctttgacaaagataaccattgctagttatatagatatgtttattattttaggaatatatctaggagcctttatcaactctacactaaactttagtaatgtgatcctctttacaacaaatttattgccatttacaaagagagaaataactattggacaaaaattatttaagctatcttttgcg…	MIKQNILSNSLTLFKFYVNDALRGFLDRPIFKNKTIRVGMILITIALYFWYFYINIRAFFGLGEIKNLPEVVSLTKITIASYIDMFIILGIYLGAFINSTLNFSNVILFTTNLLPFTKREITIGQKLFKLSFALIIFELLLVIVFPFFIRVAVLSLLSLSLLFIILHQVFIVSFLLVDIIYSVVLNILLERFRNLRTVFQYILDMLLVSIATIYMLVYRFPIENKLGYTDFSVDSIIYLIYILTLVLLVIIFMLILKKDFYTPMQVKRRFFLYRVSSLKIPIIYSLFALTRQKNFLYTIMTFILIVYITGIQNGITDALKVFASFYFLINISGINYASATSNFRKFYDFYRISIIYEGVSLVISSVILSLPLLILTLCSNTSWDNLLINYSFFLISVIF…	hypothetical protein
NODE_131_length_3534_cov_60.057412	fig|1578.617.peg.234	3533	2949	-	ABC transporter, ATP-binding protein		aacttttacacaattatatggactttatcttctggaactattgcaattgatggttttaaacctgatagcaaagaatttaaagaacgtatattttatattccatcagatttttatttacctgagtatatgacgggaaaggaatatgcttatttcataatgagtagatatactaaatcttcgtatcaattatttattgagataataaaattgctagatatgtcaaattatctagacaaacctcttgagtcttattcttttggaatgaaaaaaaagattcaacttgctataatgtttgcaactcccacgccatatataatagctgatgagatattcagcggtttagacctggaaaccagcattataattcaagagttattttttaaaattatcggtaagaga…	NFYTIIWTLSSGTIAIDGFKPDSKEFKERIFYIPSDFYLPEYMTGKEYAYFIMSRYTKSSYQLFIEIIKLLDMSNYLDKPLESYSFGMKKKIQLAIMFATPTPYIIADEIFSGLDLETSIIIQELFFKIIGKRKIILVSHEKNIIAKFSDNILIMSDGTLTKYRQDPNLIDDFIKRGEQIDDKTKYIKQLFDSL	ABC transporter, ATP-binding protein
NODE_132_length_3455_cov_77.158679	fig|1578.617.peg.235	993	163	-	hypothetical protein		gtgaaacagatttttattttttcagataatagaaaagatagtattgtatattttgaacgcgagccagcaattttagtttcaatgagtcgtagtgacttgttgtatttaaaagaacaagattttgcaacgtatccagcgatctatgttttaattggtggtaataagcgttatgtcggacaagttgcaggacaaaaaatcgagcaacgtttaacgcaacactttcaaaataaagcaaatgactgggtcgaatctgtgctgttttttggacgggcggatggtaaaatgtcaaaagctgatacagattatctcgagcgtaggctgattaaggattttaaagaaaagtcaagctatgagttgacaaattcgactaagggaaacaagtcatatattgataagtta…	MKQIFIFSDNRKDSIVYFEREPAILVSMSRSDLLYLKEQDFATYPAIYVLIGGNKRYVGQVAGQKIEQRLTQHFQNKANDWVESVLFFGRADGKMSKADTDYLERRLIKDFKEKSSYELTNSTKGNKSYIDKLQKAKSDQLYNIAFEILNDIANIDLFGTEKKESNTYNEYHPFKLTFENKVITAKSARKLYTKFAEAIIENPSYEAIIKKMVVEGCPTYSLIFGSEIGNYNGYPNAVRLSNGICLYNNLSRKALREKINTIAQQVGVEYEILKWG	hypothetical protein
NODE_132_length_3455_cov_77.158679	fig|1578.617.peg.236	1310	1128	-	hypothetical protein		atgaagaaatatttggagattgtagaaaaagctgtagttgccttggtctttgcttttatttttgctggtataatacagcttttggggatcgattttaatacaaagagatatatttgtatggtcatagtaacgctacttttcttcgctttaattgattttattcgaataaagcgttcgcgatag	MKKYLEIVEKAVVALVFAFIFAGIIQLLGIDFNTKRYICMVIVTLLFFALIDFIRIKRSR	hypothetical protein
NODE_132_length_3455_cov_77.158679	fig|1578.617.peg.237	1539	1342	-	hypothetical protein		atgaaagataaaatgaatattgctattgtagttgctatttttgttacgcagtatttttatagtttatttattgcaaagttgatgccttctgctgaagtgaacctagtcgtcaatattttagttagtttgttagtgatcgggagtgttgttctggtatttaaagggttggaaaaatggaaaatacgaggtactgaataa	MKDKMNIAIVVAIFVTQYFYSLFIAKLMPSAEVNLVVNILVSLLVIGSVVLVFKGLEKWKIRGTE	hypothetical protein
NODE_132_length_3455_cov_77.158679	fig|1578.617.peg.238	2101	1604	-	hypothetical protein		atgtcaggaagacaaacaaataaaaaattagctatcgatatggtcacagttttgacgcaaccaccagttccaccggcattgcattatgtgaatctgcggacgatcatgggagaatttgaatggaataagctgaaaaaacaatatcgtttgttagctgatcatcactgcatgatctgtcaacgatatgtcagtcatactgctggggactggcttgaattacatgagcaatatgaatatgattttgttaatttgatccaaacattgactggatatgtctcgatctgtcatgaatgccacatgtatatccacacgggatttttgggtttacaattgcagcaaggcactatcagtttggagaaatatcagcaagtgatcgctaagggggatgcattgttgcaa…	MSGRQTNKKLAIDMVTVLTQPPVPPALHYVNLRTIMGEFEWNKLKKQYRLLADHHCMICQRYVSHTAGDWLELHEQYEYDFVNLIQTLTGYVSICHECHMYIHTGFLGLQLQQGTISLEKYQQVIAKGDALLQEFGLQKIVYPSDACFYDPEWKLSFGGKLYQSH	hypothetical protein
NODE_132_length_3455_cov_77.158679	fig|1578.617.peg.239	2530	2162	-	hypothetical protein		atggaattaaaagttatcgcacatgatttttcagtttgcaaagtaaaagattattcacaagttgacttaagtaaggaatactgttttacaggaaaaacagatgaagaaaactcattagtttgtttgactaaagatgtacctccaaacgtcttggaacgtgatgatgcttggaaagctttccggatccaaggtgtgttagatttttcactgatcgggatcttggctaagatctcgactttgttagcagaaaataaaatcggtatctttgcgatctcaacttacaatacggattacatcttgactaaggcaaaagaatatcgctcagcattagatgtcttggctaaagcaggttatcagatcgtagaataa	MELKVIAHDFSVCKVKDYSQVDLSKEYCFTGKTDEENSLVCLTKDVPPNVLERDDAWKAFRIQGVLDFSLIGILAKISTLLAENKIGIFAISTYNTDYILTKAKEYRSALDVLAKAGYQIVE	hypothetical protein
NODE_132_length_3455_cov_77.158679	fig|1578.617.peg.240	3136	2669	-	DNA protection during starvation protein		atgaagtatggagaaacaaagaaagttttgaaccaacttgtagcagatttgagccaaatgtcgatgatcattcatcaaacacattggtatatgcgtggcaccaactttttgaagttacacccattgatggatgaattcatggatgagatcaatgaccaactcgatgtgatctcggaacgcttgatcattcttgatggagcaccatattcaaccttacgtgaaatggctgagcatacagggatcaaagatgaacctggtagctatgacaagacgatggcagaacatctagctaaattgctagaaggttatcgctatcttgaagctttgtatcaaaagggtatcgaagttagtgatcaagaacaagatcacagcacacaagatatctttatcggatttaag…	MKYGETKKVLNQLVADLSQMSMIIHQTHWYMRGTNFLKLHPLMDEFMDEINDQLDVISERLIILDGAPYSTLREMAEHTGIKDEPGSYDKTMAEHLAKLLEGYRYLEALYQKGIEVSDQEQDHSTQDIFIGFKTDIEKKIWMVSAELGNAPEIDK	DNA protection during starvation protein
NODE_132_length_3455_cov_77.158679	fig|1578.617.peg.241	3453	3229	-	hypothetical protein		gaacaaaaaattgatattcctgaagggctaatggatagtgaagctaaaacatatgtattggtgaccaagtatttaacagagcatgaaagtataaatactacagtaactgctaaattgatccaaaaatcagtagcaacagctcgcaagcatttagctaaatttgtaagcttgggtcttttagtggcacagggaagtaataaaaatcgcagttatcatatagtgtag	EQKIDIPEGLMDSEAKTYVLVTKYLTEHESINTTVTAKLIQKSVATARKHLAKFVSLGLLVAQGSNKNRSYHIV	hypothetical protein
NODE_133_length_3410_cov_72.597276	fig|1578.617.peg.242	204	76	-	hypothetical protein		atgaggttagttgagctagaaaaagaaatcaaagaattaaaaaagttgcttaccgaggcaactactctaagtaagcaactcaaaagcgtattagaaagcattgaagaaattaaaaaccgagttttctaa	MRLVELEKEIKELKKLLTEATTLSKQLKSVLESIEEIKNRVF	hypothetical protein
NODE_133_length_3410_cov_72.597276	fig|1578.617.peg.243	443	207	-	hypothetical protein		atggcaaggaattggctaaataaagaacagttcatggaaaaatacgcacaaagcaaatctacctatcacagacggatagaggagcttcgaaagtctgagttttgggatgcgtatattcatccttcaactcaagaagtttggatcgatgaggatcgttaccaagagttcttgatttggaaatcagctaaccggtttaaaaagttgaagaacttaggtatcgatgaagggaggtggtaa	MARNWLNKEQFMEKYAQSKSTYHRRIEELRKSEFWDAYIHPSTQEVWIDEDRYQEFLIWKSANRFKKLKNLGIDEGRW	hypothetical protein
NODE_133_length_3410_cov_72.597276	fig|1578.617.peg.244	648	457	-	Phage transcriptional regulator (ACLAME 494)	ACLAME 494	atgccagaaacactagaaggacgcgaacgtattattcaatacttgaatgcaaacgacattacgatcgctgatttagctgcaatgtatggaatcgcaaaacaagacatgagcgattacttgtccggtcgcaaaaagaatccacgcggaaacaaaatcattttgaaaatcatttctgatttcaagatcagatag	MPETLEGRERIIQYLNANDITIADLAAMYGIAKQDMSDYLSGRKKNPRGNKIILKIISDFKIR	Phage transcriptional regulator
NODE_133_length_3410_cov_72.597276	fig|1578.617.peg.245	1237	911	-	hypothetical protein		atggcggaaagtccatttaaaggattaagcataaaaggtcatccagtatcaaaagaagaatttatgagctggtatgacgattatgttaaacgttgctcgaaccgtgagacaaaaaatgcccataaaacccaaagagattttatggacgaaggacataatgtgattgaagttgtagggaactcagttattttgaatggtttaagaatcaatgttaattcagtaacaattgagcatgatgaagtaaccctaaaattcaaagctattccttattatgatcctgatcggctaggaattgatgacctttcaaggataaatcagatgtactga	MAESPFKGLSIKGHPVSKEEFMSWYDDYVKRCSNRETKNAHKTQRDFMDEGHNVIEVVGNSVILNGLRINVNSVTIEHDEVTLKFKAIPYYDPDRLGIDDLSRINQMY	hypothetical protein
NODE_133_length_3410_cov_72.597276	fig|1578.617.peg.246	2082	1252	-	hypothetical protein		atgaattctttaaaaattttagggcaggaaaaagtaggaaattttgaatttactggaatcgaaggtggtttcggtgaaggaaagaaatcaatgttagttaaagacattgcagaaattcacaagcggtcatccaaagtaattaatcaggctatcaatatgaatattaagcgttttagagcaggtgtagatattttggatttaaaagcatcaaatttcgaggtcaatttaattgacctcggatttacccaaaatgcaatcaatcgttccaacaacatctatcttctatcagaacgtggttattccaagttactcaagatcttagaagatgatacagcatgggaaatttacgatcagctggtcgacaattactttgcaatgcgtcagtcgattcagtcagaa…	MNSLKILGQEKVGNFEFTGIEGGFGEGKKSMLVKDIAEIHKRSSKVINQAINMNIKRFRAGVDILDLKASNFEVNLIDLGFTQNAINRSNNIYLLSERGYSKLLKILEDDTAWEIYDQLVDNYFAMRQSIQSENKALLADKRLEIMEQNAATRRAQLMYKIAMATKSQRHRELMLNRAGKELVGEMVIPAMEVESVEYTASEVAEKLGVLTKAGKPYPAKVGEYANRISLKAEQPGQNEYGRWIISKSKYSAKEVAQWVYFEAGVQKLKEYLELIK	hypothetical protein
NODE_133_length_3410_cov_72.597276	fig|1578.617.peg.247	2319	2119	-	hypothetical protein		ttgcaatcagtaccaccactaaagttaagcgctgcacgaaataatgcaggcttaacgcaaaaagaagcagctgaaaaattaggaatcagctatcaaacattatcacagtacgaacgtaatccaagcggtgtaaaactgggaatgttgcaaaaaatgagcgaattatacggtatccctattgagttcattttttttaaataa	MQSVPPLKLSAARNNAGLTQKEAAEKLGISYQTLSQYERNPSGVKLGMLQKMSELYGIPIEFIFFK	hypothetical protein
NODE_133_length_3410_cov_72.597276	fig|1578.617.peg.248	2487	2338	-	hypothetical protein		atgaacttaaaaaaaatcttatttggaaaatacgaatatcataagaagtcaagcgatgacaagcttgatatgcgaatcaacgtacaatttggtattttgccaattgttgcaatcgtcattgtaattgctttgatgatttggttattttaa	MNLKKILFGKYEYHKKSSDDKLDMRINVQFGILPIVAIVIVIALMIWLF	hypothetical protein
NODE_133_length_3410_cov_72.597276	fig|1578.617.peg.249	2826	3221	+	hypothetical protein		atggctagaacagagctcactcctcaagatatagagtataaaaagattatttctagtaagcttaactctcttttgaactctgcaaacaaaaaacaaatagatataacaagacaaactggtatccctgcaagtactctaacaggatatttcaagggaactcgacttcccgcccccaagaacgtcgcaaaactagcaagctttttcaacgtccctgactatgagatagacccaagatttaaaaagaatactgatgatgaaaaagagcatattgatctcactggaatttcccgacctgagaccgaagaaaaaattttctcttatgaaggtaaagaaatacctaaacgagatttagaacttataagacgtattttagaaactggcgaatatgacgagtag	MARTELTPQDIEYKKIISSKLNSLLNSANKKQIDITRQTGIPASTLTGYFKGTRLPAPKNVAKLASFFNVPDYEIDPRFKKNTDDEKEHIDLTGISRPETEEKIFSYEGKEIPKRDLELIRRILETGEYDE	hypothetical protein
NODE_133_length_3410_cov_72.597276	fig|1578.617.peg.250	3230	3379	+	hypothetical protein		atgtattacgagcaagaagatgttcttgattatttattatctatctgtaagaaaaaacatattaaatgtttttggccatcctctcttgatccacacacgccacctacagctttacctagcaaaaggcgcatcgttatgaaccctaactga	MYYEQEDVLDYLLSICKKKHIKCFWPSSLDPHTPPTALPSKRRIVMNPN	hypothetical protein
NODE_134_length_3401_cov_95.246734	fig|1578.617.peg.251	1	696	+	Aspartyl-tRNA(Asn) amidotransferase subunit A (EC 6.3.5.6) @ Glutamyl-tRNA(Gln) amidotransferase subunit A (EC 6.3.5.7)	6.3.5.6	atgaagatcgcagtgccaaaagaatactttggtgaaggtgtcgcaaaagatgttaaagaagcgatcaaaaaagcgatcaagacatttgaaagcttgggggcaacagttgacgaagtttccttgccacacagcaagtatggagtcccagtatactatatcattgcctcttctgaagcttcatctaacttacagcgttttgatgggatccgttacggctttagagcacaagatgttaagaacttagaagatgtttatgtgcgttcacgttctgaaggttttggtgatgaagttaaacgtcggatcatgttagggacattctcactttctgctggaacttatgatgccttcttcaagaaagctgctcaagtaagaactttgatctgccaagactttgcacag…	MKIAVPKEYFGEGVAKDVKEAIKKAIKTFESLGATVDEVSLPHSKYGVPVYYIIASSEASSNLQRFDGIRYGFRAQDVKNLEDVYVRSRSEGFGDEVKRRIMLGTFSLSAGTYDAFFKKAAQVRTLICQDFAQVFSDYDLILGPTAPTTAYGIGDEINDPITMYMNDILTIPVNLAGLPGMSLPAGFSNGLPIGMQLIAPQFREDTMYKAGYAFEQATDFHKQVPTIGGQN	Aspartyl-tRNA Asn amidotransferase subunit A
NODE_134_length_3401_cov_95.246734	fig|1578.617.peg.252	696	2129	+	Aspartyl-tRNA(Asn) amidotransferase subunit B (EC 6.3.5.6) @ Glutamyl-tRNA(Gln) amidotransferase subunit B (EC 6.3.5.7)	6.3.5.6	atgaactttgaaacaacgatcggacttgaagtccacattgaaatgaagacaaactccaaggcttattctcccgcaccagtagtttacggggcagaaccaaacacgaatactaatgttatcgattggggctacccaggggtcttgccacaattgaacaagggtgctttggaatatgggatgcgtgcggccttggcacttaactgtgagatcgcacgggatatccactttgatcgcaaaaactacttctatccagataatccaaaggcataccagatcacacaagcccaaacaccgatcggtcacgatggttggcttgagatcgagcttgaagatggaactaaaaagaagatcgggatcgaagagatgcacgtcgaagaagatgcggggaaaaacacgcat…	MNFETTIGLEVHIEMKTNSKAYSPAPVVYGAEPNTNTNVIDWGYPGVLPQLNKGALEYGMRAALALNCEIARDIHFDRKNYFYPDNPKAYQITQAQTPIGHDGWLEIELEDGTKKKIGIEEMHVEEDAGKNTHAGDGYSYVDLNRQGTPLIEIVSKPDIASPEEAYAYLTRLRQIIQFTGVSDVKMEEGSMRADVNISVRPIGSTKFGTKTEMKNLNSFEHVKKGLEYEAKRQERVLLAGGEIQQETRRFDEPSGETILMRVKEGKSDYRYFPEPDLPPIHISDEWVAQVKDSIPEMPDVRRKRYVNDWGITEYDAGVLTQTKEMSDFYEATVAAGADAKLAANWLMGEVSAYLNAQKVELGQTALTPEHLATMIKLIQDETISSKIAKKVFKEIIKND…	Aspartyl-tRNA Asn amidotransferase subunit B
NODE_134_length_3401_cov_95.246734	fig|1578.617.peg.253	2158	3180	+	Transcription regulator [contains diacylglycerol kinase catalytic domain]		atgcaaaagcgttgccgaattatttataatccgacgtctggacgtgaagctttaaaaaatgatctagttgagatcttaaatattttagaacgtgctggttatgaaacgagtgcctttgcaacgacgcctgagcctaattctgctcaaaatgaagctaaacgggcagctcaagcaggctttaacttgatcattgcagctggtggtgatggtacgatcaatgaagttgttaatgggatcgccccgctaaaacaccggccaaagttggggatcattcccgccggtacgaccaatgactatgcgcgggctttaaagataccgcgagaaagtccgatcgaagcggctaaagtcatcgccaatggtaaaacggtcaagatggatatcggacgggccaatgataag…	MQKRCRIIYNPTSGREALKNDLVEILNILERAGYETSAFATTPEPNSAQNEAKRAAQAGFNLIIAAGGDGTINEVVNGIAPLKHRPKLGIIPAGTTNDYARALKIPRESPIEAAKVIANGKTVKMDIGRANDKYFVNIAAGGLLSELTYAVPSEFKTLFGYLAYLVKGAELLPRVKPINMHLEYDDGVYDGKASMFFLALTNSVGGFEQIVPDASLDDGKFTLIVVKTSNLLEMMRLITMVLNGGKHINDANILYVKTSKLVAKPVDEKMMINIDGEYGGDAPMKFKNLKRHIEIFANTQAIPKRAITEVKEDEGMDEAKKNFVDGVQELDESDNIKLDK	Transcription regulator [contains diacylglycerol kinase catalytic domain]
NODE_135_length_3352_cov_123.879180	fig|1578.617.peg.254	291	1	-	hypothetical protein		gtgttgaaaaaatatagtctatatatgggtaattttttacttacttttttgatattaagtgtgctcttgtttgtggtaggatttgctccttttggtaataaatcattagcgatcatggatgcctcgatccagtatctggatttcttttcttactggaaagacgttttatcaggacaaaatagtgctacatttacttttagtaatttattaggatcaggaaactggtcacaagtaacttattatctactatcaccattcaatctagtcaagtccataatcctgtgtaaaata	MLKKYSLYMGNFLLTFLILSVLLFVVGFAPFGNKSLAIMDASIQYLDFFSYWKDVLSGQNSATFTFSNLLGSGNWSQVTYYLLSPFNLVKSIILCKI	hypothetical protein
NODE_135_length_3352_cov_123.879180	fig|1578.617.peg.255	1490	438	-	hypothetical protein		atgaagaagagaattgattggatagatatagttcgagcaatgggtatgtttctgatcattatgggtcatacattggaaggatacacttactcaatcgtgggaaaattgattttcgctgtgcatgtaccggtgttctttgttttgtcaggatatctttataaagaaaaaccagtaaaaaaagtttttaaaagtgggaatgtcaatctattattgccatatttagccactttgctcattgtagttattattacgagatttaattttatttttcctaattggatctacaagttagatatgcacaattttttgatatcagctttctacggtagtggaacaaacttgaatccattttgggataagtcattaacgatcaatgcaataggtgctatttggttttta…	MKKRIDWIDIVRAMGMFLIIMGHTLEGYTYSIVGKLIFAVHVPVFFVLSGYLYKEKPVKKVFKSGNVNLLLPYLATLLIVVIITRFNFIFPNWIYKLDMHNFLISAFYGSGTNLNPFWDKSLTINAIGAIWFLLAMYFGNIIFNILIKSSRGNLFVSGVVATAITFGGFYLSDMGILLPWSLNAAMASQLFYYGGYLIRKFDLIEKYGISGSIVGIALWMISAQSGFLYLNTAHADSPILAVLGGIGGSFSLMYLAKLLCETKLNLDAVKYYGQMSLIVLCVHLIDLNTCAISGKIYENLIQTTGDQIIAVSMEILYRFLLTVVGIIVIPRLPIVRSFYLNRVYPFWAKK	hypothetical protein
NODE_135_length_3352_cov_123.879180	fig|1578.617.peg.256	1898	3289	+	Uncharacterized transporter YbxG		atgagtaaggattcacaagagcagcctaaaaatcatttaaatcggtcgctcacgtctggtcagatggaaatgatcgcccttggtggaacgatcggggtcgggttatttatgggttcgacttccactatcaagtggactggtccatctgttttgctagcttatgcctttgttgggatcgtcttatatgcagttatgcgtgccctaggtgaaatgatctacatcaaacctgggactggttcttttgctgactatgctaccgattatatccacccacttgctggttatttgactaagtggagcaacatctttcaatatatcgtcgttgggatcagtgaagtcatcgccgttactcaatatttgaattactggtggcctaatctccctgactggatctccggg…	MSKDSQEQPKNHLNRSLTSGQMEMIALGGTIGVGLFMGSTSTIKWTGPSVLLAYAFVGIVLYAVMRALGEMIYIKPGTGSFADYATDYIHPLAGYLTKWSNIFQYIVVGISEVIAVTQYLNYWWPNLPDWISGLVVVITLALANLASAKAYGTLEFYFALIKVVTIILMIVMGLAVIFLGFGNNWQPLGLSNLWAHGGFFPGGFKGFMFSLSIIVGSYQGIELLGITAGEAANPKHAIVAAVKSIVWRILIFYIGAIFVIVTIYPWDQLAAIGSPFVETFSKVGIAGAAGIINFVVLTAAMSGANSGIYSSSRMLFKLSLDHEAPKIFSKLSKHVVPNVAILAISGGILLGFILNIILTTLNKDTANLFVIVYSSSVLPGMVPWFVILISELRFRRQNT…	Uncharacterized transporter YbxG
NODE_136_length_3245_cov_92.170610	fig|1578.617.peg.257	1072	2	-	Membrane-bound lytic murein transglycosylase D		ttgaagagtagaaaagaacgtcttgagaataaaaaacaacagctgttatctgagaatataaagtctgtcaaaaaagctacgacgtatattggaacgactgttttgatgggaacagctggtttagtgttgagtaaagttaaggcgcaagctgatacagttcagatcgatcaaaatacatcatctaataacaataatgaaaatactagtgcaaattccaacaatataaatgaccaaaatcaagtttcgacgcaaactgcgcaaactcagacacaagctcaagctgcatcttctagccaagaacaaagtcaagttgcttcagctagtcaagcggtacctagttctgccgctgcaccaacagtcaatgtctcacgcacttacccagggaatgtacaaacattt…	MKSRKERLENKKQQLLSENIKSVKKATTYIGTTVLMGTAGLVLSKVKAQADTVQIDQNTSSNNNNENTSANSNNINDQNQVSTQTAQTQTQAQAASSSQEQSQVASASQAVPSSAAAPTVNVSRTYPGNVQTFLNNIAGPAQQVAQQRGLYASLMIAQAALESGWGGSYLSTSAYNLFGVKWSGSGAYIELPTQEFYNGSYHTIYDKFQRYSSYAESLNGYANVITTRFPKSTRANSANYAIAAQNLRYGVYGTYATAPDYADKLIRVIQTYNLTAYDVGGTSVDTNQTPTNNNNNVDQTQTSGNGTYTVKAGDSLYRIAKNHNISLQELKSLNNLNSDLIFAGQVLKVSGQVSSSQ	Membrane-bound lytic murein transglycosylase D
NODE_136_length_3245_cov_92.170610	fig|1578.617.peg.258	1212	1451	+	hypothetical protein		atggatcgttataaagtagctaatacgtctacccttataaaagttgaattttataaagatgtcaaagtcggggctaattatgatctgaaagttttatttcctaatattgttaataatccccatacaccaaacatcaccagtatcataattacaatgttgatcataatattataccaagtgtcagttggtaaataccaaaataaaaaaatatcacatatgatatacccaataacattataa	MDRYKVANTSTLIKVEFYKDVKVGANYDLKVLFPNIVNNPHTPNITSIIITMLIIILYQVSVGKYQNKKISHMIYPITL	hypothetical protein
NODE_136_length_3245_cov_92.170610	fig|1578.617.peg.259	3019	1826	-	S-adenosylmethionine synthetase (EC 2.5.1.6)	2.5.1.6	gtgtcagaaagacatttatttacatcagaatcagtctcagaaggacatccagataaaattgcagatcaaatcagtgatgcgatcttagatgcgttgctggaaaaagatcccaatgcacgtgtagcagcagaaacaactgttaccacaggtttagtagttgttgtcggtgaaatttcgactaataagtatgtcgatattcaaaaagtagtacgcgatacgatcaaagagatcggttatactaatggcaaatatggttttgacggcgataattgtgccgttttgacggcgatcgatgaacaatcagctgatatcgctttaggtgttgataactcattggaaacaaaagaaggtcaagcagatccgctcgatcagatcggtgcgggggatcaaggtttgatg…	MSERHLFTSESVSEGHPDKIADQISDAILDALLEKDPNARVAAETTVTTGLVVVVGEISTNKYVDIQKVVRDTIKEIGYTNGKYGFDGDNCAVLTAIDEQSADIALGVDNSLETKEGQADPLDQIGAGDQGLMFGYAINETPELMPLPIALSHRLMRRIAQVRKSGDLAYLGPDAKAQVTVEYADDGKPLRVDTVVLSTQHAAEIGLEQIRQDILEKVIQTEIPAELLDEKTKYFINPTGRFVIGGPQGDAGLTGRKIIVDTYGGFAHHGGGAFSGKDATKVDRSASYAARYIAKNIVAAGIASQVEVQIAYAIGVAQPVSIAVDTFGSSKVSNQALVAAIRKIFDLRPAGIIEMLDLRRPIYKQTAAYGHFGRTDVELPWEKTDKVAELKAELNLD	S-adenosylmethionine synthetase
NODE_137_length_3176_cov_94.693287	fig|1578.617.peg.260	1	1275	+	Replication-associated recombination protein RarA		ctagccagtcgtttacgaccagagaatttagagcaagttttcgggcagacgcatttattgggaccgggtaagatcttacgagaattgatcacgcaagatcgagtgacttcgatgatcttgtggggcccacctggtgtgggaaagacgacgttggctcaagttatcgctaagcagactaaagcaggttttatctcatttagtgcggtcaccagtgggatcaaagagatcaaaaagatcatgcaagaagccgaagctaatactgcttatggacaaaagacgatcgttttcgtagatgagatccatcgtttcaataaggcgcaacaagatgcttttttaccgtttgtggaaaatggcagtatcgtcttgatcggggcaacgacagagaatccatcttttgag…	LASRLRPENLEQVFGQTHLLGPGKILRELITQDRVTSMILWGPPGVGKTTLAQVIAKQTKAGFISFSAVTSGIKEIKKIMQEAEANTAYGQKTIVFVDEIHRFNKAQQDAFLPFVENGSIVLIGATTENPSFEINSALLSRLKVFVLKQLTKEQLVELLDRACRVGFEKELAASKTLLEQIAIFSDGDARNALNTLEMLVDNGNVSQDGTLELSDDLLSQVLGEKTLKYDKNGEDHYDLISALHKSMRNSDVDAAIYWLNRMLAGGEDPLYIARRLLRFASEDIGLADNNALNLVVNVFQTCQFIGMPECNVHLTQAVIYLSLAPKSNAVYKATTRVAKDVKQTLNEPVPLQIRNGTTKLMKELGYGKGYELAHFTKDKLTTMQTMPDNLVGHTYYLPT…	Replication-associated recombination protein RarA
NODE_137_length_3176_cov_94.693287	fig|1578.617.peg.261	1361	1765	+	hypothetical protein		atgaatcgcgagagtttgatctttatgcgagttagccaacttcagcgccaactactagctaacagtgcaacagttttacagcaagttggcataactaacgcacaatacgatatcttaaattatgtatataaccatactggacgtactcaaaaggagttagctactaccttggtcgtcactaagggaaatatcacccagatcatcacaaagatggaaagactggatctgatcaaaagaaaacaagtaggtaaagcaaagcagctatttgtgacagaaaatgggcgtcagatctatgaacagatcacacctaaattagaaaaagcccacgctgatgctttagctgagttagatctggccgagcaaaaacaacttttacgtcttctaaaactagcactaaag…	MNRESLIFMRVSQLQRQLLANSATVLQQVGITNAQYDILNYVYNHTGRTQKELATTLVVTKGNITQIITKMERLDLIKRKQVGKAKQLFVTENGRQIYEQITPKLEKAHADALAELDLAEQKQLLRLLKLALKG	hypothetical protein
NODE_137_length_3176_cov_94.693287	fig|1578.617.peg.262	1840	3174	+	RNA methyltransferase, TrmA family		atgaaacggaaattacctgtagttaaaaatcaaaaattagaagcgacgatcgtggatctgacttaccaaggaatgggtgtcgctaaagtcgaaggatattcacttttttgtgatgatgctttgcctggtgaaaaagtaaaactccatgtgttaaaggtcggcaaaaattttggttatgctaaagttatcgaacgcttaacgaccagtcctgagcgggtcacggggaaaggcaaagcttattcacaaacggggatcgcaccattacaacacttagcttatccagctcaattgaaattcaaacaaaaattagtcagtgatctgttgcaaaaggcacatctagctgatctagcagtcgaacaaactttggggatggcagaaccatatgcctatcgtaacaag…	MKRKLPVVKNQKLEATIVDLTYQGMGVAKVEGYSLFCDDALPGEKVKLHVLKVGKNFGYAKVIERLTTSPERVTGKGKAYSQTGIAPLQHLAYPAQLKFKQKLVSDLLQKAHLADLAVEQTLGMAEPYAYRNKAQVPVRELDGKLTAGFFKRGSHNFLPLTDFLIQDKRIDEVIQKVLAILQKNQVTAYDEATHSGILRHIMVRRGHYSKEVMVVLVTRTNKLLNKEAIVNEIMAACPDVVSLQQNINSKQTNVILGDKTQVLAGKEYITDQLNGLKFEISAKSFYQVNPTQTEKLYQEAIKRAGLTGSETVIDAYCGIGTISLSMAKHAKKVYGVEIVEAAIADAKKNAALNNLDNLEFEVGNAEDWMATWQEQGIKPDVIMVDPPRKGLTQSLIESA…	RNA methyltransferase, TrmA family
NODE_138_length_3174_cov_108.843362	fig|1578.617.peg.263	2	1021	+	hypothetical protein		caagctttaggagtcaatatcgtgatcacagctaatcggatcaacagcttacgggcaacgatgctagcaaatatcaataagcgtttgagtttatatatggtcgataaagatgaatataagagcatgcaaggctatcaagcactgatccagtcaccgatcccaggtcgggggcagatcgagttagaagagatcttagattttcaagcatacttaccgactaaacaagctgatgtcctagcaagtgttaaagagctacgaaagctagctgaaacaatgtcagacaattggaccggtgatctaccagctaaagtaccgatgttgccaaaaattatcagtactaagttcttgttcaaaaataagaaagttcaagcaatgcgtgaaaaatcagaattcccgatc…	QALGVNIVITANRINSLRATMLANINKRLSLYMVDKDEYKSMQGYQALIQSPIPGRGQIELEEILDFQAYLPTKQADVLASVKELRKLAETMSDNWTGDLPAKVPMLPKIISTKFLFKNKKVQAMREKSEFPIGFDKESAEVVGYIPKQTKYFMALSDTPEQDEYFENNILENFRYLKGKVKTIVFDLSGKYTEQTDIFDNVIGVDDIGMMVKKLGSEIEKRAVTGEHRPIYIYIPEAEQLAQKIMLSVDDLQVLLQKGYLVGIHLIFSADQKAMSSGFQDISKLLRNSIPAGLIGSKLSDQNLIKVTSSYREPFVGQDESNLFIGREVTKVKLASEVD	hypothetical protein
NODE_138_length_3174_cov_108.843362	fig|1578.617.peg.264	1025	1465	+	hypothetical protein		ttggatagagaaaagatcgcagctcatgcacgcggacaaaatatgcgaactcaggcgttacaaaaacaaagtgcagctagagatctgagtggtaaacagatcgcaattgagcataagatagagcgccttgaaaaagccctgagttctttaagcaaagatctaaatcatgctaatacttggaaaaatgagttgcttaaactaaagactaagggaacccgtggatttcatggaagtcgtaggaataaggcaaatgacaatgttgatcaaacaataggtaagcttaatagttggcttgatgcgcataaagaaaataaagtagtaatgactaagaaattaagggaacttcaagaccaaagccaaaatctgcattcaaaggtcttagcgctgaataatgaagct…	MDREKIAAHARGQNMRTQALQKQSAARDLSGKQIAIEHKIERLEKALSSLSKDLNHANTWKNELLKLKTKGTRGFHGSRRNKANDNVDQTIGKLNSWLDAHKENKVVMTKKLRELQDQSQNLHSKVLALNNEATVLFSSAAYFLNM	hypothetical protein
NODE_138_length_3174_cov_108.843362	fig|1578.617.peg.265	1478	2134	+	hypothetical protein		ttgacagaattagagttatggaaactagctgttcctgagttagatgatgatggcttgttaaataagatctgcttagatatcgcaactgatgtggaccaacacaataagatcattgatgggatcttgcaaaaagatagtttatttgaatatacacctttatttggaactggtttaaaagtgaactatcaatgggataaaaagcaagtggtgcttgagcggctagggcagagcgtatcattggaaatgactgcttggtttgagttattggcaaagatcgatcttgttttttctgatgtacttccgatcggttctgtgatcgaagttgatggagaaaaaacgaccccagaactcagggagatttttgaaagtcaagaagatgggataggcttttatctacag…	MTELELWKLAVPELDDDGLLNKICLDIATDVDQHNKIIDGILQKDSLFEYTPLFGTGLKVNYQWDKKQVVLERLGQSVSLEMTAWFELLAKIDLVFSDVLPIGSVIEVDGEKTTPELREIFESQEDGIGFYLQIVARKVAVETSDNYVDYLATVWPIGMQPLVQPIFISNYLIKSVIAKGYTNEFEKKYAKGTKLNMLLKKRHSILLDMLLGVLEDED	hypothetical protein
NODE_138_length_3174_cov_108.843362	fig|1578.617.peg.266	2124	3173	+	hypothetical protein		atgaagattgatgtaggtgaagtcctagcgaccagagacgaattgttacggactaagtcgcatcttttgggcagtttgagtgatgctaaaatggcagctgactcggtcaagaaaagtagtgcgttggcaggtcaagcaaaaaaagctgttgaagctgaatatgccaactataaactgccatttatcacggtacttgaagaagcattgatcggtctagtaaatacctttgatcaaaagatcgatgacttcaaagagatagtggaagagaccgcagctgatgcggtgatcgatacgcaaacgatcgatgagttgaaacagacactgcggacaaagcaaaatgaactaaaagaattggatgcttcgtttaaaaagacatacagtagtgtttcagatattgtc…	MKIDVGEVLATRDELLRTKSHLLGSLSDAKMAADSVKKSSALAGQAKKAVEAEYANYKLPFITVLEEALIGLVNTFDQKIDDFKEIVEETAADAVIDTQTIDELKQTLRTKQNELKELDASFKKTYSSVSDIVSVHAPSIGGITKELSDTKKVYENTKKWLERFENQNEAFKKIDDQLELQLKAIGNVGSEVSKGYGTLKTGSYLFKTDYLTSSQKFDKAMRATVIQRNPALEMLSGTDLDTRGLNDISKMIGDLKWGKGKYKVAKDTQKYLVNAYLVAALKKDSKGRIGFKTADELYKEIEKHLPKAVREKLEKPLKKLIEHLDNKYIVKAFQTSKSGLSKKNMRVLID	hypothetical protein
NODE_139_length_3149_cov_118.662067	fig|1578.617.peg.267	255	4	-	hypothetical protein		atgactaagaataaaactttggtactaggcatttgtggaccagtaggtgttggcaaaactttattgatccaacgtatccaagcgatgcttagtgagcgctattcgctagccacgttaagtgatggtatttttacagtaaaggacctaaattacgtcccacctttaatgacgcctagccggaaatcccgtgactttagtcatgggatggataggccactattgagaggctgtgacataagtctctatctttaa	MTKNKTLVLGICGPVGVGKTLLIQRIQAMLSERYSLATLSDGIFTVKDLNYVPPLMTPSRKSRDFSHGMDRPLLRGCDISLYL	hypothetical protein
NODE_139_length_3149_cov_118.662067	fig|1578.617.peg.268	809	2263	+	hypothetical protein		atgcataatgaacaactctttgatcataagagtctacagatttattctttattactactgctacatttatataataatcacctccgtaaatccgagctctgtcaagcactcaagatcacttctccgaccttaagtcagctgactgaacagatcaatggctttgatccccagttattgaccgtaacacgccatgagatcattttgaatctcccttataacagccaagcagttcaaagtttaaataaacagatcttatcttcatcattacgctttcaactcctagatctttattttaaacattcaacgttgacccgggaagaaaccgcgcgctccttaaatatcagtttgacttctaccaataaattgatcggcgaatgtaacgaacttttacgcgaattc…	MHNEQLFDHKSLQIYSLLLLLHLYNNHLRKSELCQALKITSPTLSQLTEQINGFDPQLLTVTRHEIILNLPYNSQAVQSLNKQILSSSLRFQLLDLYFKHSTLTREETARSLNISLTSTNKLIGECNELLREFNLEIKQNMLRGTGSQFFYFYFNFYWNTHAKGTVLRKFIISDHGFKAYAKEKLGSQLSIIQNDQISLYLSLLSNKHELIRTYFSNQKASTLFFEVKVTPLYQDLTNYFKQNWSFLDHDLVEYYSYLTFIFLNTHNIISYPVTEINSLFKHSKCQQLLEQITTILTNSYNFNNDFNALRSSLYFTINKLLLLDGYYYSNNILSLEVKKKASQPFEEKVIAEILNIPLVQSFKLNPYKLQAIRDKLRMIIYPHKSMKRRCISIGVISQL…	hypothetical protein
NODE_139_length_3149_cov_118.662067	fig|1578.617.peg.269	3032	2316	-	Transcriptional regulator, GntR family		atggagccaaaatataaacagatcttagaaacgatcaaaaagcagatcattgacgggaagtaccctgctggtagtatgatcccagatcagaacacactggcacgtgattttaaaactagtcggatgacggtcaaaaaagctctagatatgttagcgatcgagggcttcatctattctaaaagaggagcggggacttttgtaaaaaagaatgctctagcgcaaaaagatgccttaccagtagatagttataggggcttgagcagtcaattcagtaaagcgcgggtcaaaagtgaaccgatcgtttttgatgtgacttttccgacgtctgagatcaaggaacgtttagaattgaagcaaaatgaaccagtctatgagatcttacgtttgcgttttgttgat…	MEPKYKQILETIKKQIIDGKYPAGSMIPDQNTLARDFKTSRMTVKKALDMLAIEGFIYSKRGAGTFVKKNALAQKDALPVDSYRGLSSQFSKARVKSEPIVFDVTFPTSEIKERLELKQNEPVYEILRLRFVDDEPYALEHTFMPISLVPNLSQEVLFGSIYAYLTKEIHLEIGGAFRKISAEKASKNDIKYLASAETDPILQVEQVVYLQDGRPFEYSISRHPYNGKHAYTIFDRKN	Transcriptional regulator, GntR family
NODE_13_length_27204_cov_105.798057	fig|1578.617.peg.270	3	326	+	Sortase A, LPXTG specific		cagatgggagctgaaggtaattatgccttagctggtcaccatatgaaagacgccaaattgctttttggtccactagctgatgccaagctaggcgataagatctatgtgaccgatgaaaaaaaggtctatgtttatacgacgacgctcaaaacagtcgttaataaaagtgaagttcaatatatttatgatgaaccaggcaaaaagatgatcactttagttacttgtgcttcaggtgaagatggcgaagtcgaccgaacgatcatccaaggtgaactagctgaggttttagatgcaacaaaggaaaatcttaagtatttcaactaa	QMGAEGNYALAGHHMKDAKLLFGPLADAKLGDKIYVTDEKKVYVYTTTLKTVVNKSEVQYIYDEPGKKMITLVTCASGEDGEVDRTIIQGELAEVLDATKENLKYFN	Sortase A, LPXTG specific
NODE_13_length_27204_cov_105.798057	fig|1578.617.peg.271	386	535	+	LSU ribosomal protein L33p @ LSU ribosomal protein L33p, zinc-dependent		atgtcgaagaaaaaagtggcacttgcttgctcagaatgtggttcacgaaactattcgatcaccgaaaatgttaaccgcgcagaacgcttagaagttaaaaagttttgcaagtgctgtggcaaacatacgatccatcgtgagaccaagtag	MSKKKVALACSECGSRNYSITENVNRAERLEVKKFCKCCGKHTIHRETK	LSU ribosomal protein L33p @ LSU ribosomal protein L33p, zinc-dependent
NODE_13_length_27204_cov_105.798057	fig|1578.617.peg.272	557	724	+	Protein translocase subunit SecE		atgaaattcattaaaagtgttatcaaaacaatgaaggatacgacttggttgacagctaaggagacaagacgtgatacgaccacagtagtagtcatgtcgttagcatttgcggtcttctttgggttagttgattatgcggctcaagctgtgatcaatttgttagtctaa	MKFIKSVIKTMKDTTWLTAKETRRDTTTVVVMSLAFAVFFGLVDYAAQAVINLLV	Protein translocase subunit SecE
NODE_13_length_27204_cov_105.798057	fig|1578.617.peg.273	847	1398	+	Transcription antitermination protein NusG		atggcagaatcatttgaaaagaaatggtatgtattacacacatacgcaggttatgaaaataaagtcaaaactaacttggaatcacgggcacaatcaatggggatggaagactacattttccgcgtagtcgttccagaagaagaaaaagttgaaacaactaagacgggtaaagaaaaagttgaaactttaaaaactttcccaggctatgtgttagttgaaatggtgatgactgatcaatcatggtacgttgtacgtaatacaccaggcgtaaccggctttgttggttcacatggtgctggtagtaagccagctccattgcttgatgaagagatcgatcacattttgaaccaacttcaaggtagtcaacaccaagctgattttgatgctgaagtgggcgat…	MAESFEKKWYVLHTYAGYENKVKTNLESRAQSMGMEDYIFRVVVPEEEKVETTKTGKEKVETLKTFPGYVLVEMVMTDQSWYVVRNTPGVTGFVGSHGAGSKPAPLLDEEIDHILNQLQGSQHQADFDAEVGDAVTIIDGAFASMVGKITEIDAEKSKVKVMINMFDRETMAELNFGQVERLV	Transcription antitermination protein NusG
NODE_13_length_27204_cov_105.798057	fig|1578.617.peg.274	1453	2331	+	hypothetical protein		atgcttaaagatgctaataaattggtccagacaacggttctagcggctagcgggttagctttgggagtggcacttgagtggtataaattagcagaaccgagtaaaaatcgcgaagtgacgctccaaaatcaggtcccgacattatttattcatggatacgctgggactcgcttgtcttcgggcttgatgatcaaacggtttgaacactacggatgggggcaaaaaagcacagtgatcgtggtgaaagctgacggccgtttgaagatcaagggtgaccctggtatccctggtgggtttatccaagtattatttgataagaatcggatgtcgatcatccatcagactgactggttatggcgtttgatgagttatttgaaaaataactatgatatcgaaaag…	MLKDANKLVQTTVLAASGLALGVALEWYKLAEPSKNREVTLQNQVPTLFIHGYAGTRLSSGLMIKRFEHYGWGQKSTVIVVKADGRLKIKGDPGIPGGFIQVLFDKNRMSIIHQTDWLWRLMSYLKNNYDIEKINIIAHSMGGVTVLNFLSKFGIADRVPHVEKVVTLGVPFNDTEVGKDGKEIEYRPLTQYGPLTMAPLFSKIKKHRYIISPDTKFLNIAGDLENGTASDGSVSLDSVLSLRYLLPRQVYHEVIVKDKKASHSRLHENRQVDKMIGQFLFGKQALQVFTDK	hypothetical protein
NODE_13_length_27204_cov_105.798057	fig|1578.617.peg.275	2478	2903	+	LSU ribosomal protein L11p (L12e)		gtggcaaaaaacgtaatcaacgttgttaaattacaaattcctgctggtaaagcaactccagctccacctgtaggtcctgctttaggtcaagcaggtatcaacatcatgggattcacaaaggaattcaacgctcgtacagctgaccaagctggtatgatcatcccagttgttatcagtgtttatgaagatcgttcatttgacttcattacaaagacaccgcctgctgcagttttacttaagaaagctgctggtgtagaaaaaggctccggcgaacctaacacaaacaaagttgctacagttacaaaagcacaagttaaggaaatcgctgaatcaaaaatgcaagatctaaacgctgcagacgtagaagctgctatgcgcatgattgaaggtactgcacga…	MAKNVINVVKLQIPAGKATPAPPVGPALGQAGINIMGFTKEFNARTADQAGMIIPVVISVYEDRSFDFITKTPPAAVLLKKAAGVEKGSGEPNTNKVATVTKAQVKEIAESKMQDLNAADVEAAMRMIEGTARSMGFVVED	LSU ribosomal protein L11p
NODE_13_length_27204_cov_105.798057	fig|1578.617.peg.276	3006	3698	+	LSU ribosomal protein L1p (L10Ae)		atggctaaaaagaaaagcaagaaatatttagaagctgctaaaaaagtcgaagcagacaaagcttacacagctaacgaagcagttgctttggttaaagaaatcgactttgcaaacttcgacgcaacagttgaagttgcatttaacttaaacttagatacaaaacaagcagaccaacaattacgtggtgctttagttttaccaaacggtacaggtaaagaacaaacagttgttgtctttgctaaaggtcctaaagctcaagaagctaaggatgcaggtgcagacgttgtcggtgacgatgacttagttgcacgtatccaagatggctggttggactttgacgttgcgatcgcaacaccagacatgatggcacaagttggtcgtttaggtcgtgtacttgga…	MAKKKSKKYLEAAKKVEADKAYTANEAVALVKEIDFANFDATVEVAFNLNLDTKQADQQLRGALVLPNGTGKEQTVVVFAKGPKAQEAKDAGADVVGDDDLVARIQDGWLDFDVAIATPDMMAQVGRLGRVLGPKGLMPNPKTGTVTMDVAKAVSDAKSGQVTYRTDRDGNVHVPVGKVSFDEAALVGNFQAIYDTIAKLRPAAVKGTYIKHVSLASTFGPSVTLDTNSL	LSU ribosomal protein L1p
NODE_13_length_27204_cov_105.798057	fig|1578.617.peg.277	3809	4627	+	hypothetical protein		atgaacagtgaaatcgaatgtataaagtttgggagagaaggtgataagattattgaagaaattagtgatgataagtttaatcctgtagacttttgtaaactatttgaaaaatctggtgtaaaaagaattgaatatatttctaagggaagatattttgaactgagtatggggaatattccagtgctggatccaaacagtggttttatagaaaatatgagatttaatgaaaaattagattcacaagaaggaaaaaattttggctggaaagtaactttgacaaatcctaatgttagattaaacgcacaaagtatagtttcttgtagtactaaaaaatgtatagagaacaaaagatatcctatcaagtttattaaaaatagtaacattataggtgtagatgct…	MNSEIECIKFGREGDKIIEEISDDKFNPVDFCKLFEKSGVKRIEYISKGRYFELSMGNIPVLDPNSGFIENMRFNEKLDSQEGKNFGWKVTLTNPNVRLNAQSIVSCSTKKCIENKRYPIKFIKNSNIIGVDAIHRGHLLAYAFFDCIPYVSVQFTKEKKGTRNKYNIYAQFKRANCNKKNDHGQLYFEDKVSNYLKKSVNAKIYYEVEAIFRNEDDVVPIGNRIKAISLDKTDDFEDFHVFIPNFQEFGFKDRIAKESDYKFSYREGFVKK	hypothetical protein
NODE_13_length_27204_cov_105.798057	fig|1578.617.peg.278	4877	5701	+	hypothetical protein		atgaaaggtgaggctatattttttgaatacaattatatagcagtagttagtatgaattttatgaatagtggaaatgatgttttatattatatactctgtgtagttagtgctgttattgtgttgcccatgttattatactggatgtggaataaacttcggcagcagatgataaaggatagtataaagtgttgggcgtgttttgggattttaggtgtattgctgatagaaattttttcagtcttctatcttgcttgtggtgttattaaaatatcagaagaagaggtagacttaagcgcagcagcggaattgacaagtgcatttgttacagctatctcggtattaggggctggtataggttacttttacagtaagagacaggataagatacaggctattcat…	MKGEAIFFEYNYIAVVSMNFMNSGNDVLYYILCVVSAVIVLPMLLYWMWNKLRQQMIKDSIKCWACFGILGVLLIEIFSVFYLACGVIKISEEEVDLSAAAELTSAFVTAISVLGAGIGYFYSKRQDKIQAIHTEGEWRRRLFDLEKKPEYQISDLIELASLIDIVPNNEKVLALYVNAVMIEILKNHGANSDGEMRLNEPISKRFEVLCDKCNLRPSVTKLLKLHPKDTALEKTVYDYDITSIKNEILIHPEENEIRRCIHALLKDDWENVTN	hypothetical protein
NODE_13_length_27204_cov_105.798057	fig|1578.617.peg.279	6076	6579	+	LSU ribosomal protein L10p (P0)		ttgagtaaagaaattatcgctaaaaaagctgcgatcgttgaagaagttgttgaaaaatttgaaaaggcaagttctgttgtcgtagttgactaccgtggtttaacggttgaagaagttactaacttgcgtaaagaattacgtgaagcaggcgttgaaatgcgtgttatcaagaacacatacttgaagcgtgctgctgataaggcaggttacgaaggtcttgatgatacattctcaggtcctactgccgttgcttttgctgatgaagatgttacagctcctgctcgtatcttatctaaattcgcagaagatcatgaagctttggaaatcaagggtggtatgatcgaaggcaaggtcgtttccttggaagagatccacgctcttgcaaaattaccaaaccgc…	MSKEIIAKKAAIVEEVVEKFEKASSVVVVDYRGLTVEEVTNLRKELREAGVEMRVIKNTYLKRAADKAGYEGLDDTFSGPTAVAFADEDVTAPARILSKFAEDHEALEIKGGMIEGKVVSLEEIHALAKLPNREGMLSMLLSVLQAPVRNFAYAVKAVADSKEEDAA	LSU ribosomal protein L10p
NODE_13_length_27204_cov_105.798057	fig|1578.617.peg.280	6644	7009	+	LSU ribosomal protein L7p/L12p (P1/P2)		atggccttagatacagaaaagatcattgctgacttaaaagaagctagcattcttgaattaaacgacttagtaaaagctatcgaagaagaattcggtgtttccgctgctgctccagttgcagctgcaggtgctgctgcaggcgctgcagaagaaaagagcgaatttgatgttgaattaacagatccaggtgctggtaaagttaaagttatcaaagcagttaaggatatcacaggtcttggcttgaaagatgctaagggcttagttgatggcgctccttccgttatcaaagaaggcgttgctaaagaagaagctgaagaaatccaagctaaacttgaagaagttggcgctaaagttactcttaaataa	MALDTEKIIADLKEASILELNDLVKAIEEEFGVSAAAPVAAAGAAAGAAEEKSEFDVELTDPGAGKVKVIKAVKDITGLGLKDAKGLVDGAPSVIKEGVAKEEAEEIQAKLEEVGAKVTLK	LSU ribosomal protein L7p/L12p
NODE_13_length_27204_cov_105.798057	fig|1578.617.peg.281	7183	8028	+	hypothetical protein		atggaacaaaaagtatggttagtgacaggtgcttctaaggggatcgggctccagatcgtgcttgaggctcttaaggcggggaatatcgtcgttgggacttcacgtgattcccaaaaattatctcaagccgtagcgacagaacttggagaaacaagtaaaaacttttgggcagtcgagatggagtttgatgaaactagcatcaacacgattgtagcgcaagtcattgctaagtatgggcggatcgacgtgttggtcaataatgctggttacgccttgttaggtgcggtcgaagaagttgagttgacggatgtcaaaaagaattttgacgttaatttctttggcttactcagtatgacgcaagccgtgttacctcagatgcgaaagcaaaaggcaggaaac…	MEQKVWLVTGASKGIGLQIVLEALKAGNIVVGTSRDSQKLSQAVATELGETSKNFWAVEMEFDETSINTIVAQVIAKYGRIDVLVNNAGYALLGAVEEVELTDVKKNFDVNFFGLLSMTQAVLPQMRKQKAGNIINLASISGTVTGPTQGIYSATKAGVIMLSEALAAEVEPFGIKVTAIAPGGVRTDFLDQTSLREPAKTTSDYQVVRDTMAGLKRLNHNQSGDPKRVAEAIVKVAQMKRPPVRLYLGSGAIQALQAKLNEVVTEVNAHLDLSQSTDFRD	hypothetical protein
NODE_13_length_27204_cov_105.798057	fig|1578.617.peg.282	8104	9057	+	Glutathione S-transferase, omega (EC 2.5.1.18)	2.5.1.18	atgggtactttagttaacggtaaatggacgcaaaaaagtttagctcaactgcgagctgagggcaaagatatccaagtcgatcccggttttcgtaattggatcaccccagatggctcagcggggccaactggtaagggtgggtttaaggctgagaagggtcgctaccatctgtatgtctcttacggttgtccgtgggcaaatcgggctttattgatgcgtggtctcaagggtttacaagactatatcggcctatcagtcgttgatccggtattgggggctgatgggtggcaattcagtgattttccaggcacgatcgctgatccgatctttggtgccagatcattgccagaagtttataccaaagcaaaagctgattatactgggatcgctagtgtaccg…	MGTLVNGKWTQKSLAQLRAEGKDIQVDPGFRNWITPDGSAGPTGKGGFKAEKGRYHLYVSYGCPWANRALLMRGLKGLQDYIGLSVVDPVLGADGWQFSDFPGTIADPIFGARSLPEVYTKAKADYTGIASVPVLFDKQTGQIVNNESADIMRMLESAFDELTGDHTAYYPKALRAQIDELNVYCDSFYAKVNATKDAKTQAEYEKAVAQVFTMLDDLEQRLKDQAYLLGDAPVETDWKLFTFLVRFDIVFYGLYKCNLKLLSAYPNLWRYVRQLYNTPGVAETVNFEHIKVHHYRGQLDLNPSGIVPIGPKEDWSL	Glutathione S-transferase, omega
NODE_13_length_27204_cov_105.798057	fig|1578.617.peg.283	9149	11734	+	L-O-lysylphosphatidylglycerol synthase (EC 2.3.2.3)	2.3.2.3	atgaagcaaacatttcagcaggtgaaaagcttcgttgaaaaaagagcaactattctgaaattaatttttgtcctttcagtattgatctttgtaacttttgaaatcggaaaaatttttcgcgaggtcgattggtatcaagtaaaacaagggctcgcagatcaatcattgtttagcattattttaatgcttggtgctggtattattgcggtcagtcctatgctgttgtatgatttttcgatcgttaaatttttaccagataaatacagtccgtggtatatcttacgcagtgggtggatcaccaataccgcgacaaacattgctggctttggtggctttttaggagcagctttacgggctgatttttatcacaaaaatgctagtaaaaagcaggtcatctat…	MKQTFQQVKSFVEKRATILKLIFVLSVLIFVTFEIGKIFREVDWYQVKQGLADQSLFSIILMLGAGIIAVSPMLLYDFSIVKFLPDKYSPWYILRSGWITNTATNIAGFGGFLGAALRADFYHKNASKKQVIYALSKIALFLLAGLSLYCWVSLGLIFWFDLGPHLKGYWPWLIGGGLYFPLLFLTTKFKQGDFFKDLTLKRELILILASLLEWGFAALFFIFIGEQLGIHANYAAVLALYFTGSVLGIISMVPGGLGSFDVFMMIGLLPFGVTTEQAVIWLLFFRLFYYIIPFGIGLSFFVHYAGSQVNHKLNGIPKLILQKTAHMLLTAFLYVSGILLLLEAAIPNWAYSNSFLAKLYPYTFLFINQLTDIVFAFALIGMARGIEAKVKKAYWPTLI…	L-O-lysylphosphatidylglycerol synthase
NODE_13_length_27204_cov_105.798057	fig|1578.617.peg.284	12817	11867	-	Ribonucleotide reductase of class Ib (aerobic), beta subunit (EC 1.17.4.1)	1.17.4.1	atggaaaactataaagcaatcaactggaacaatttagaagaccagatcgataaagcaacttgggaaaaattgaccgaacaattttggttagatactcggatccctctttcaaatgacttagccgattggcgggaattttccgctgctgataaagatgttgtggctaaagtctttgggggcttaacattattagatactttgcaatctcaagatgggatcgcagcgcttaaaaaagatatccggacgcaacaagaagaagccgtcttcaacaatatcgaatttatggaatcagtgcacgctaagagttactcctcgatcttttcaactttgaatacgcctaaagagatcgcagagatctttgcttggactgattcaaatgagatcttgcaatacaaggca…	MENYKAINWNNLEDQIDKATWEKLTEQFWLDTRIPLSNDLADWREFSAADKDVVAKVFGGLTLLDTLQSQDGIAALKKDIRTQQEEAVFNNIEFMESVHAKSYSSIFSTLNTPKEIAEIFAWTDSNEILQYKAQKINDIYQNGTPLQKKVASVFLETFLFYSGFYTSLYWLGHNKLANVAEIIKLILRDESVHGTYIGYKFQLGFNELSEEEQEEFKGWMYELLYDLYENEEKYTHLLYDQVGWSDDVLVFLRYNANKALMNLGMDPLFPDTAEDVNPVVMNGISTSTSNHDFFSQVGNGYLLGNVEAMQDSDYEF	Ribonucleotide reductase of class Ib
NODE_13_length_27204_cov_105.798057	fig|1578.617.peg.285	15004	12833	-	Ribonucleotide reductase of class Ib (aerobic), alpha subunit (EC 1.17.4.1)	1.17.4.1	ttgagtcttaaagatatcgatatcaacaacgttacgtactacgatctaaacaaccgggtcaacattcccttaaacggtcagatccaactcgaccaagacaaagcagctttaagcgcctttttcaaggaaaatgtcattcctaatacgatgacctttgcttcacttaaggaacgctttgactatttgctagacaataactatcttgaaacacaatttatccaaaaatacgattttgcctttattgaaaagctctatgcgcagttagaagcagctgattttcgtttcaagacctttatggcagcttacaagttttatacccaatatgcgctaaaaaccgatgatggtagttattacttggaaagtttcatcgaccgagctgcgatcaatgctttgtacttt…	MSLKDIDINNVTYYDLNNRVNIPLNGQIQLDQDKAALSAFFKENVIPNTMTFASLKERFDYLLDNNYLETQFIQKYDFAFIEKLYAQLEAADFRFKTFMAAYKFYTQYALKTDDGSYYLESFIDRAAINALYFADGDESLALQLADEIVHQRYQPATPSFLNAGRARRGELVSCFVLQVTDDMNSIGRVINSALQLSRIGGGVGITLSNLRSAGAPIKGIKGAASGVVPVMKLLEDSFSYSNQLGQRQGAGVVYLNVFHPDIIDFLASKKENADEKIRVKTLSLGVLVPDKFYELAKQNADMYLFDPYDVERKYGTPFSYVDITAQYDNLVNDPDIAKKKISARLLEEEISKLQQESGYPYIVNVDTANKANPIKGKIITSNLCSEILQVQTPSLVNNQ…	Ribonucleotide reductase of class Ib
NODE_13_length_27204_cov_105.798057	fig|1578.617.peg.286	15368	14994	-	Ribonucleotide reduction protein NrdI		atgaaaataatttattttagcgtcaccgggcagacccgacgcttcatcaaaaaacttggacctaccgtcgatgccactgagatcgatccggtggatccactttttatggtaaatgaacctttcgtcttgatcgtaccgacctatgaagatgagatcacttaccctgtaactgaatttttagaatacgcaaataacgctgcatcattaaaagggatcgtcgggaccggcaaccgtaattttgcagagttatttatttttacagctaaaaacttggctaaaaaatttaatgttcctgtgctctattcatttgaattcaatggaacacccacagatgtccaaaatttcaaggaagcggtgaataaacttgagtcttaa	MKIIYFSVTGQTRRFIKKLGPTVDATEIDPVDPLFMVNEPFVLIVPTYEDEITYPVTEFLEYANNAASLKGIVGTGNRNFAELFIFTAKNLAKKFNVPVLYSFEFNGTPTDVQNFKEAVNKLES	Ribonucleotide reduction protein NrdI
NODE_13_length_27204_cov_105.798057	fig|1578.617.peg.287	15595	15365	-	Glutaredoxin-like protein NrdH, required for reduction of Ribonucleotide reductase class Ib		atggctttagatctatatacaaaagataactgcatccaatgcaagatgaccaagaagtttttaatggagaataatattgaatttggagaacataatatctccgatcatccagaatatatcaactacctaaaagaaaaaggtttacgcacagttccagttttagaacaagatcatgcaccgatcatcaatggtttccggcctgatctcttaaagaagctggcagctcaatga	MALDLYTKDNCIQCKMTKKFLMENNIEFGEHNISDHPEYINYLKEKGLRTVPVLEQDHAPIINGFRPDLLKKLAAQ	Glutaredoxin-like protein NrdH, required for reduction of Ribonucleotide reductase class Ib
NODE_13_length_27204_cov_105.798057	fig|1578.617.peg.288	16354	15764	-	Aggregation promoting factor		atggaaatgaagaaagttattacgggagctgccgcgttatctggtttagttgcattgggccaaacagcaaatgctgatgaagttgtcgttaaagccggcgatacagtatctgaattagcccttaaatacaacacaacgatcgatgcgatccaacaagctaacaaattacaagatgtaaacttgatcttcgttggtcaacgcttagaagttggtagcaacgttttagctgaagcttcacaagctgcacaacaacaagctcaaccagcacaagcagctccacaagctcaaactcaagtccaagaagcacaacctgcacaacaacaaacacaacaagtgcaaacaacgactccacaaacgccagtaaacgatgctgaagtaagtgctaaagcttggatcgct…	MEMKKVITGAAALSGLVALGQTANADEVVVKAGDTVSELALKYNTTIDAIQQANKLQDVNLIFVGQRLEVGSNVLAEASQAAQQQAQPAQAAPQAQTQVQEAQPAQQQTQQVQTTTPQTPVNDAEVSAKAWIANVESGGSYTAQNGRYYGKYQLTNSYLGGDYSPENQERVADNYVANRYGSWQAAKSFWLANGWY	Aggregation promoting factor
NODE_13_length_27204_cov_105.798057	fig|1578.617.peg.289	16594	17769	+	Acetate kinase (EC 2.7.2.1)	2.7.2.1	atgcctaaaattttgttaatgaacgctggaagttcatcagttaaatggaaattatttgaattaactgatgaatcagtcgtcgctaaaggcttagtggagcgaatgttagccccaggttcaaagtttgagatcaaatatggagatcagacatatcaagaaacacaagatggcctaacttatgaaaaagcagctgaaatgatcattgaaaagatccaagagttaaagatcacctctttagctgatattaaatgtgttgggcatcgtgtcgtagctggggggactaaattcacgcaagctactaagatggatcaagcagcgatcaaagaagtcttagctttgagtgaccatgctccattacataatccaatggaagcaaaatacatcgaattgatgcaacaa…	MPKILLMNAGSSSVKWKLFELTDESVVAKGLVERMLAPGSKFEIKYGDQTYQETQDGLTYEKAAEMIIEKIQELKITSLADIKCVGHRVVAGGTKFTQATKMDQAAIKEVLALSDHAPLHNPMEAKYIELMQQVMPNTPQYAVFDSQFFTQMPEENAIFSLPYELTQKYGIRRYGEHGISHEYLAQKTAELLEKPLADLKLITLHLGSGSSVSAVKDGKAFASSMGFTPLTGLTMGTRAGDVDPSIVPFLMKKLDKTADEVLELFNQKSGLLGLSGYSDDMRDIKANQADQRCKLALDVYLNKIVSYVGSYFAQLGGADVLVFAGGIGENNPWLRADVCQRLACLGVQLDQELNEAGHEGVISTENSKVKVMLVPTNEELAMVQQIKAQLD	Acetate kinase
NODE_13_length_27204_cov_105.798057	fig|1578.617.peg.290	17848	18819	+	Ribose-phosphate pyrophosphokinase (EC 2.7.6.1)	2.7.6.1	atggaaaagatgcaagaaaatgcaaatatcaaattatttgcattaaattccaatcaagcgttggcacaaaagatcgcagctgaactggggatcaagctatgtgatgcttcagtcaaacatttcagtgatggtgagatccaaatcaacatcaatgaaagtgtgcggggagatgatgtgttcatcgtgcaatcagtcgctgatccggtcaatgaaaactttatggaattgatggtcatgatggacgcgttacgacgctccagtgctggttcgatcaatgcagttattccttattatggttatgcacgtgctgaccgtaaagcacgttcgcgtgaaccgatcacagctaagatgatcgctaatttcatcacattagctggggcggatcgagttgtgacaatg…	MEKMQENANIKLFALNSNQALAQKIAAELGIKLCDASVKHFSDGEIQININESVRGDDVFIVQSVADPVNENFMELMVMMDALRRSSAGSINAVIPYYGYARADRKARSREPITAKMIANFITLAGADRVVTMDLHAGQLQGFFDIPVDHLLAIYEQAAYFKQKGICEDVVVVAPDHNSVKGARNLADLLKAPIAIVDKRDDTRLDIENSSIIGDVSGHNCIVFDDMIDTGGKMADAAAALDKAGAREIYACATHPVFSGSAVEELEGSPYKEVVVTDTIAIPENKQFSKLKVLSIAPIFAKAISLIYHNRSVDSLFNNNDNI	Ribose-phosphate pyrophosphokinase
NODE_13_length_27204_cov_105.798057	fig|1578.617.peg.291	18907	22440	+	ATP-dependent helicase/nuclease AddAB, subunit B		atgagtttgaaatttgtgctaggcacagcggctaaagaccatcaagcgtcattgttagagcagataaaaactatcagtcaaacagacccgcaagccaaaatatattatatcgtccccaatcatataaagtttgcgactgaagtttctgtcttagatcacttacgaaaaagtagtggccaggacttattggctgctacggacatccaagtcctatctttttcacggttagcttggtattttatgaaaaatgagcctaactatcagttaccgcggctatcggcagctggggctaatatgttggtccataagatcttgcggactaaaaatgatgaattgacgatctttaaaagtgagcagacccagccaggctttgtgtcacaattagctggacaattggtc…	MSLKFVLGTAAKDHQASLLEQIKTISQTDPQAKIYYIVPNHIKFATEVSVLDHLRKSSGQDLLAATDIQVLSFSRLAWYFMKNEPNYQLPRLSAAGANMLVHKILRTKNDELTIFKSEQTQPGFVSQLAGQLVELSLALITSADLWHSYEMLEQSKDTDLVAKLHDLSIVYREFEQHIQGKYLGTANMLEALAKKLAQSDLSHSYFILDGFSQFNAGEYQIITSLLQTAKQVTVSLVLDRPYVHHAPEASELFYRSGQVYYRLYQLARHEHVKVLVDSFAKQDRVSADLVTLENYWIASNDLKPFTLTAKLQGDLQVIEAADRLEEVKCLATKIRQMVLLEGYRYQDFLLLTRHLDPYKNILQPTFEQFEIPFFTDLQKKMSDHPLVELIQALFLVDQR…	ATP-dependent helicase/nuclease AddAB, subunit B
NODE_13_length_27204_cov_105.798057	fig|1578.617.peg.292	22440	26183	+	ATP-dependent helicase/nuclease AddAB, subunit A		atggctgagatcaaatttacacctggtcagctccaggcgatcaatgatgaaggcaaaaatattttggttgctgcttcagccggctcggggaagacccgggtgttggtcgaacgtgttatcagaaagatcaaagaaaaaaccgcagtagacgagatgttgatcttgacctttactgaagcagcagcgcgggaaatgaaagaacggatccaaggcgctttacgccaagcgatcaatgctgaatctgagcctgagactaagcgattttacctacaacaactgacaaaactcaatgttgccgatatcagtacgatcgatgcattttgtttgcgcatggtccaaaaatattactatttagcccagatcgatcctgattttcgattgttgactgatgaaactgag…	MAEIKFTPGQLQAINDEGKNILVAASAGSGKTRVLVERVIRKIKEKTAVDEMLILTFTEAAAREMKERIQGALRQAINAESEPETKRFYLQQLTKLNVADISTIDAFCLRMVQKYYYLAQIDPDFRLLTDETERALLRESVWEDLREELYGKLDPLFEQLTLNFSNDRSDDGLTELVMELFDFANVNPDPKAWLENLAKNYHLEAGNLEQSEFYRTEFLPYINEQLQKFADYMEQATLNLEGIADPEDKLAKLKALYRTEAKELCQLAKLDLTKISYNELKVTLEAVKFKRAPAARLDDEQKVLKNQAQALRDETKKQLNELLVNYFNAQESEVIELFKQAEILAKKAAEVVLRFMRRYQAEKKRRHVLEFSDLEHLTLKILRQQEDTSVKELLQARYQ…	ATP-dependent helicase/nuclease AddAB, subunit A
NODE_13_length_27204_cov_105.798057	fig|1578.617.peg.293	27204	26416	-	Calcium-transporting ATPase (EC 3.6.3.8)	3.6.3.8	ccagccttaaagaccgcggatatcggggtcggtatggggatcactggaactgaagtatctaagaatgcttctgatatcgtcttagctgatgataactttgccacgatcattttagctgttcgtgaaggtagaaaggtcttttctaacatccaaaaagcgatccaatacctcttgtctgctaacttaggtgaagtattgacactctttatgatgaccatgctcaactggtcgatctttgctccggtacagatcttatggatcaacttagtcacagatactttccctgcgatcgctttagggatcgaaaaaggcgaaaaagacatcatgaaaaagaaaccacgcggtagtcgctcgaactttctctctaatggggtcggttcaagcatcatttaccaaggt…	PALKTADIGVGMGITGTEVSKNASDIVLADDNFATIILAVREGRKVFSNIQKAIQYLLSANLGEVLTLFMMTMLNWSIFAPVQILWINLVTDTFPAIALGIEKGEKDIMKKKPRGSRSNFLSNGVGSSIIYQGILEGVLTLGVYWIAINYPFHESSALIHADALTMAYATLGVIQLFHAFNSKSIHGTIFSKETFNNKYFNIAVLASAVLLAMTIFVPAFNSTFHVTTLALEQWGIVLGAGSLMIIIVEVVKFFQRKFIYKD	Calcium-transporting ATPase
NODE_140_length_3124_cov_119.097056	fig|1578.617.peg.294	2	1441	+	beta-fructofuranosidase (EC 3.2.1.26)	3.2.1.26	ttacgtttgttcatattttatatagcagaattttatattatgaaaaaaatgatcgaattaactaacgaccgctaccgtttaggctaccatgtcagtgcccctgctggttggataaatgacccaaatggtttttgttactacaaaggatactaccacatcttttatcaatatcacccttattcagctgattggggtccaatgcattggggccatgcccgaagtaaagatctgatccattgggaaagcttaccgatcgcgatcgctccagatacaaaagccgatgaagatggctgcttttctggcagtgcgatcgttaaagatgatgtcttatatctcatctacacggggcatcattactatggtgacggtgatcctgatcacttttggcaaacacaagat…	LRLFIFYIAEFYIMKKMIELTNDRYRLGYHVSAPAGWINDPNGFCYYKGYYHIFYQYHPYSADWGPMHWGHARSKDLIHWESLPIAIAPDTKADEDGCFSGSAIVKDDVLYLIYTGHHYYGDGDPDHFWQTQDLAYSTDGINFTKYENNPIIALPPTDNTHHFRDPKVWQKDDFYYMILGSQGKDGHGRVITYRSKDLKDWQYLGAITKAKSLATEGYMWECPDFFELAGKDVLLLSPQGIKADGQKYLNLFQTGYFVGEYDYQKNSFSHGSFIELDHGHDFYATQTMLAPDGRRLVFGWMDMWESDFPEKADGWAGALTLPRELILKDDKLYMRPIKELSQLRTAKLASWDKNLTQKTLLCEGEKQAELELTLDSADFSLTLNDPKTSAQIKLSFDQK…	beta-fructofuranosidase
NODE_140_length_3124_cov_119.097056	fig|1578.617.peg.295	1484	2461	+	Sucrose operon repressor ScrR, LacI family		atgcgcccaaaattagaagatgtcgctaaattggccaatgtatctaaaacgacagtctcacgggtcctaaataaccgtggctatctgagccaagaaacgatcgaccgcgtttatcaagccgtaaaagagctaaactaccaaccaaatgtagtcgcacgtcaattatacaaaaagcaaacacgcatcattgggcttctgttcccaacgatcgctaatcctttttttggtgaattaagtgccgagcttgaaaaaaggctttataacgaggggttcaaagttttgatcggtaattcgatgaatgatcctaaaaaagaagcacactatttaaatcaattactgactaaacaagtcgatggtttgatcgttgggacccataatcgcgggatcaaagaatataat…	MRPKLEDVAKLANVSKTTVSRVLNNRGYLSQETIDRVYQAVKELNYQPNVVARQLYKKQTRIIGLLFPTIANPFFGELSAELEKRLYNEGFKVLIGNSMNDPKKEAHYLNQLLTKQVDGLIVGTHNRGIKEYNYSHLPVVAIDRNMNQDIPVIESDNYNGGVLATTHLINQGAKKIIHTNGPIELESPTKRRRLAYEDTMKAYGLTPITVTVDFNIPYIEKKKIFTQIFKDHPDLDAIFASNDVDAALIMQVALEQGLHVPKDLLLVGYDGTQIIQNILPGLTTVVQPLEQIAQTAITVLKQRLNNEPTDTEYILPVTLHKGITG	Sucrose operon repressor ScrR, LacI family
NODE_140_length_3124_cov_119.097056	fig|1578.617.peg.296	3123	2527	-	hypothetical protein		gaagctgaaagcgttgtgacaaataagtcagacttaccaacaggcacaaagtacagctggaaagccccattagacgtgacaaccccagggtctcatgcgggtacggtagtggtaacatacccagatggcagccaagacgaagtaccagttaaagtggaggtaaaagcgcctaaaaaagccttaacggatgctgaaaaatacaagccacaaggtcagaaagtaacgacagcccaaggtaagcaaccagaagctcaaacaggagtgtcaaataaagcagatttaccagcagatacaaagtacagttggaaaacaccattagacgtgacaactccaggagaacatggcggtacagtagtggtaacctatccagatggcagccaagacgaagtaccagtcaag…	EAESVVTNKSDLPTGTKYSWKAPLDVTTPGSHAGTVVVTYPDGSQDEVPVKVEVKAPKKALTDAEKYKPQGQKVTTAQGKQPEAQTGVSNKADLPADTKYSWKTPLDVTTPGEHGGTVVVTYPDGSQDEVPVKVVVDGAGTTADKRKEQTQTKGTNKNALPQTGEKDTVVQAWFGVLISLLAGMLGAKTLNKKHFQDK	hypothetical protein
NODE_141_length_2947_cov_87.928277	fig|1578.617.peg.297	122	1048	+	Exopolyphosphatase (EC 3.6.1.11)	3.6.1.11	ttgaaaaatttagtgatgcttgattttggttctaattcgacgcgcatgtcgatcacacagatcgcgcctgatggtagtttcaaggaggtcaaacgagctaaggagatgacgcgtttagctgaagggatggggcaaagcgatgggcaaaagatcttgcaacctcaagctattcagcggaccttaggtgcattgttgaaatttaaaaaaatttatcgcgacctgcctaacgtgtcagttcgtgggatcgccacagcagctgtgcgtgaggcgcaaaaccaaagcgaatttttacaacaagtcaaggaagttacgaatattgatgttgaagtgctctcaggaagttcagaagcctattatgattatctagcggtgatcaatactttgactgtcaaagattgc…	MKNLVMLDFGSNSTRMSITQIAPDGSFKEVKRAKEMTRLAEGMGQSDGQKILQPQAIQRTLGALLKFKKIYRDLPNVSVRGIATAAVREAQNQSEFLQQVKEVTNIDVEVLSGSSEAYYDYLAVINTLTVKDCVICDMGGGSFELVVVKDRKAMNYISIPYGAVSLTEKFHAADKISARDLFSFSRFLNYKYHQLPWLKEGKGLPLVLLGGANRTVARQELLRSGKDEFKQIHGLKLSTYMFLETYTDWLGKDVMQRKAVLGSEAPRADIIIGGLTPVAFLLEHLQIPEIIFSESGVREGVLYSMLQK	Exopolyphosphatase
NODE_141_length_2947_cov_87.928277	fig|1578.617.peg.298	1889	1089	-	hypothetical protein		atgtcaaagcaaaaaaaattctatctactactgctcagtacttttctaggcttattttgcctaaatttaagatcaaatgtagttgtagcacgctcttcttttaccatggggatcttggaaaatgataagccctacagctataaaaatgatcaaaattggcaaggtttttctatcgaattagcccatcaattagaagaggtcactgacaccaagataaacttcaaagcttattcgagccaagaaaaaatgcgaactgctttaaaaaaggggcagatcgacttcatcttaggtgataaagctaatttttctaaaagttatcaaagtaccaaagctttcctctaccctaaaaatattctctttacccgccacgattctaagacaaaaaaactagataaaatg…	MSKQKKFYLLLLSTFLGLFCLNLRSNVVVARSSFTMGILENDKPYSYKNDQNWQGFSIELAHQLEEVTDTKINFKAYSSQEKMRTALKKGQIDFILGDKANFSKSYQSTKAFLYPKNILFTRHDSKTKKLDKMLHKKVGLLKSAQQQALLKELGLKPVVFADPTKLLEALEKSQISAGILSDYSYHALLKAEPTLAKAPTTATKAEENAILHRISDPNVLALSLSFITHNHPKINETLTEGINELRSTEKIAELSQKYFTKDLTLN	hypothetical protein
NODE_141_length_2947_cov_87.928277	fig|1578.617.peg.299	2111	2947	+	hypothetical protein		atgtctaagtcaaaccgctcgaagtggcaaataggtgagcaaaaacagcgatttgcgatcagaaaattctcacagggagtttgttctgttttagttgggacgatatttgttttcgggactcctgcagttatccaaggagatgaaatagtagctactcacatcggaacaaagaaaaaagaacagtatcagatcaaatttcagcatgtaactgaggctagcttgacctcagaacaaagagcaaaagttatttatgataatccacctaagactaaagtcagcagtgatcaagtttattatctagtttatcgtccggtggcaacgcaggatttgccacaaacaggagaaggtgcaatgccttgggaactaggggcgtttggagctggtgcactgatcatgggg…	MSKSNRSKWQIGEQKQRFAIRKFSQGVCSVLVGTIFVFGTPAVIQGDEIVATHIGTKKKEQYQIKFQHVTEASLTSEQRAKVIYDNPPKTKVSSDQVYYLVYRPVATQDLPQTGEGAMPWELGAFGAGALIMGLGVLPRRGRKYRFLTAIIVASTVVGVGSSVVSASPSFAELSNYDRAYLVAEDEELPEIATQHVGYQYIGYLLVSDIKHHEESVPTTRPVTEKLVPNSDKISNTDSPVTGMDKPENPEETTQTVDKETKTEPVGYETQYVADPELLE	hypothetical protein
NODE_142_length_2938_cov_69.216179	fig|1578.617.peg.300	674	45	-	Acyl-phosphate:glycerol-3-phosphate O-acyltransferase PlsY (EC 2.3.1.n3)	2.3.1.n3	ttgtcagagacattaaagatcatcttgatgttgatcattggctatcttttaggctccatcccatcaggtgtttggatcgggaagttgatgtatggtaaagatgttcgcaattacggtagtggcaatatgggaacgaccaatacatttcgcgtcttaggaaaaaaagctggcacgatcgttttattgatggatatgtttaaagggaccttagctgccctattacctttcctattccattcaacggctgacccgctcttgatcggtttagcagcgatcattggacatgtctttccgatctttgctggctttaagggtggtaaagctgttgccacgagtgttggtgtcttattagtttataatccattattcttcgttattgcttgggtgatttttttagtg…	MSETLKIILMLIIGYLLGSIPSGVWIGKLMYGKDVRNYGSGNMGTTNTFRVLGKKAGTIVLLMDMFKGTLAALLPFLFHSTADPLLIGLAAIIGHVFPIFAGFKGGKAVATSVGVLLVYNPLFFVIAWVIFLVTLYISSMVSVASMLGFLLITIVSFFFKDALLSVVAIALTIFVFVRHYGNIERIKNGTENMVPFGLGYKHRQQKQHK	Acyl-phosphate:glycerol-3-phosphate O-acyltransferase PlsY
NODE_142_length_2938_cov_69.216179	fig|1578.617.peg.301	1035	742	-	hypothetical protein		atgaataaacgtttgctctttgcacttggtttattattaagcgttatcttactggtgatcgggaatttagctacgttaccgataatttctttggtcggttatggcataatgagcctaatgtttttacttgctggttttacaatggctattttacgccataccggtgctttgacggctaatgaaaaaaatattgcttgggacaaagctcctggggaattaaaggcaatgactctggtgatcgggctaggctttttagctgctgggatctttgttattttcaattatatcttctga	MNKRLLFALGLLLSVILLVIGNLATLPIISLVGYGIMSLMFLLAGFTMAILRHTGALTANEKNIAWDKAPGELKAMTLVIGLGFLAAGIFVIFNYIF	hypothetical protein
NODE_142_length_2938_cov_69.216179	fig|1578.617.peg.302	1140	1403	+	Acid phosphatase (EC 3.1.3.2)	3.1.3.2	ttgaagatccaaaagatcattttaagtttcatagcttttatgctactagggatgtcaacagcgcaggctaagacgaatttgggcgaccaaaatacgatggcagttgtatggtatcaaacttcagctgaagtaaaggcattgtatgttcaaggatataatgttgcccgtgataacctggcgactaagcttgctacacagtcaaaaaagccgaaagctatcattttagatattgatgaaacggtattagacaattcgccatattaa	MKIQKIILSFIAFMLLGMSTAQAKTNLGDQNTMAVVWYQTSAEVKALYVQGYNVARDNLATKLATQSKKPKAIILDIDETVLDNSPY	Acid phosphatase
NODE_142_length_2938_cov_69.216179	fig|1578.617.peg.303	1500	1967	+	Outer membrane lipoprotein e (P4) / NMN 5'-nucleotidase, extracellular (EC 3.1.3.5)	3.1.3.5	ttgaattatgctaatgagcagggcgttcaaatttattatgtcagtgatcgtgaacagagccaattaaaggcaacgatcaagaatttgacggctgaagggttaccacaagctgagcgtgagcatatcttgctcaaacaaaagcaagctaagactaaagaacaacggcgacaacaagtggcacaacaggctgatgttatcatgctgtttggcgatgatctttctgattttaacgatccagctgaaaatactgtcgctgatcgcacaaatgatgttatgcaaaatgcgacacaatttggggataaatatatcattttacctaatccaatgtatggtaattgggaagcggcattatacaacaacaattaccaacaaagtgattccaagaagagtaggttacgt…	MNYANEQGVQIYYVSDREQSQLKATIKNLTAEGLPQAEREHILLKQKQAKTKEQRRQQVAQQADVIMLFGDDLSDFNDPAENTVADRTNDVMQNATQFGDKYIILPNPMYGNWEAALYNNNYQQSDSKKSRLRKSHLTYFDPKTNKVKQTSVTTK	Outer membrane lipoprotein e
NODE_142_length_2938_cov_69.216179	fig|1578.617.peg.304	2505	2230	-	mRNA interferase RelE		ttgaaagaataccatgttgaatactcaaaaagagcacaaaaacaaatcaagaaattagatagacaaattcaacggttgctatttgcctggatagataaaaatcttgaaggcgtatctgatccacgcatacatggtaaaggtttgactggaaaccatgctcgtgaatggagatatagaattggcgactaccgccttatatgtgatattcaagatgacataatgattatcttggctttggaatttggtcacagaagatccgtgtataataaaaaataa	MKEYHVEYSKRAQKQIKKLDRQIQRLLFAWIDKNLEGVSDPRIHGKGLTGNHAREWRYRIGDYRLICDIQDDIMIILALEFGHRRSVYNKK	mRNA interferase RelE
NODE_142_length_2938_cov_69.216179	fig|1578.617.peg.305	2723	2502	-	hypothetical protein		atggctactattagtatcaggctaaaccaacaagaagaagaactttttaaaggatatgcagaacttactggagaaaacttgtctactctcttcaaagaagctcttaaaaaaagcattgatgatgaatacgatcttcaggtatacaaagaagcatataaagagtatcagcaagatccagtaactatctcacatgctgactttaaaaaggagttaggtttttga	MATISIRLNQQEEELFKGYAELTGENLSTLFKEALKKSIDDEYDLQVYKEAYKEYQQDPVTISHADFKKELGF	hypothetical protein
NODE_143_length_2883_cov_4.910175	fig|1578.617.peg.306	2	85	+	hypothetical protein		ttatatcacgttccagcaagtgggatcaagctagacgctgaaacactaaagaaaatcaacgttaaaggaaactacaagagttag	LYHVPASGIKLDAETLKKINVKGNYKS	hypothetical protein
NODE_143_length_2883_cov_4.910175	fig|1578.617.peg.307	143	1033	+	hypothetical protein		atggaacacacaagttactattcaattcttaccgctgatgtgagatacgataaaaggcttaaaccaaatgaaaaattattgtttagtgagatcactgcattaagtaacaagcgaggttactgcaatgcaagcaataactactttgctcaactatatgacgttactactgtaactgcttctaattgggttaatcatctaaaagatcgtggatacattgatgtagaaatgatttatgacggaaaacaaattaaagagcgaagaatttttgtaaatagtaaccctattaaagaaaattttaatacccctaaagaaaaagttgaagaccctattaaaaataattttaaggggggtattaaagaaaagtttaaagagaatattacaagatttaataatacaagt…	MEHTSYYSILTADVRYDKRLKPNEKLLFSEITALSNKRGYCNASNNYFAQLYDVTTVTASNWVNHLKDRGYIDVEMIYDGKQIKERRIFVNSNPIKENFNTPKEKVEDPIKNNFKGGIKEKFKENITRFNNTSKNKQLEEDFEKLWKLYPRKEGKKKAFEAYKRAIKNGTTNKEIQTGIVNYLTQIRVQRTNKQYIKQGSTWFNGECWNDDYNVGQERSPVNPKTVPSSAPAERTVADLEREQRESRRDAFPMQYKNHPEWFNEETIKNILEEFPELREKVAEIDRARATSDSNTA	hypothetical protein
NODE_143_length_2883_cov_4.910175	fig|1578.617.peg.308	993	2228	+	DNA helicase (EC 3.6.4.12), phage-associated	3.6.4.12	ttgaccgagctagagcaacgagtgatagcaacactgcttagtaagcctgagctagtagattcagttggaatcaatgctgattggtttgaagatacacgactaaagaacgtgcttgaagttctacaaagcttagaagtaaatgagcgcaccacgttaaacgtatatagcgagctagacaagtatgaaggtcagttgagttacagagatcttgaatacatgcgagagtcggtattttcaacagcaagtattacaagcgatgtgaaagcactgcataagctagcagctaagaaacagctagatgaagcggtcgtgttgtatcagatgtcgcctaaaaaagaagagctgaaccgcttatcatcagcgattgaaaatctaaaaaagactgatgaagaagatgac…	MTELEQRVIATLLSKPELVDSVGINADWFEDTRLKNVLEVLQSLEVNERTTLNVYSELDKYEGQLSYRDLEYMRESVFSTASITSDVKALHKLAAKKQLDEAVVLYQMSPKKEELNRLSSAIENLKKTDEEDDKGYLDEAMDDLSYRMYNDMPVGIKSFPKLDDILAGGLYGSMLLTIGARPSVGKTAYGVNLAYQIITNDPEVQVDFFTLEMNKLEMLNRFVARHTNISSQRLKRPAKMLQQYEREAVAKAIEWYRERKLRVYDKVLTLSGILSIIRENAANSKPNKYIAIIDYIGLVKVENSRAQRWEQIGQISRELKIMANEYNVPIVVLAQLNRDVNANQQPQLSNLRDSGSIEQDSNVVAFLHRPYKDDPKVVQLTIQKNREGALGTIDYYFEG…	DNA helicase
NODE_143_length_2883_cov_4.910175	fig|1578.617.peg.309	2233	2652	+	hypothetical protein		atgatcatgagccgatacatgaaccaagtacaatacgctgagatcatgaagtatgaaaatctaaacgagtcgatcgctgttaaagcgtatttgcgacaagcaatgatgcagacaaacatcatcagaaagcttgagattcatgcagaagctcatgaagaccaagcaccgatatttcgcaagtatatcaaagagcatgatgaaaagagagtccaagctgtttgggatgcaatagcggtggcacaagaagagaaaaggcaaggttggcgatatgttgaagatggcgcaaacttcttagcgtatttagaagtcaagtataacggcgatctaaagcaagcgacagaggtagaaaagcttcaaattcaactaacaacgctatatgaccaaatgtacagaaagaga…	MIMSRYMNQVQYAEIMKYENLNESIAVKAYLRQAMMQTNIIRKLEIHAEAHEDQAPIFRKYIKEHDEKRVQAVWDAIAVAQEEKRQGWRYVEDGANFLAYLEVKYNGDLKQATEVEKLQIQLTTLYDQMYRKRLEGEMR	hypothetical protein
NODE_143_length_2883_cov_4.910175	fig|1578.617.peg.310	2657	2881	+	hypothetical protein		atgggaattcctaatccagaagaatacaagatcacaccacacgcaacagagcgtatcaagcagcgtttcggacaaaccaaagacactttgagtgactgggcaaatcggctgttgaaagagtgtgtatttgtaaaacgagaagagagtggcagagatcgttatcggtatcaagacattgcgattatcttagacgtaaaaaaacggcaagtgatcacaatgtttcca	MGIPNPEEYKITPHATERIKQRFGQTKDTLSDWANRLLKECVFVKREESGRDRYRYQDIAIILDVKKRQVITMFP	hypothetical protein
NODE_144_length_2834_cov_102.448768	fig|1578.617.peg.311	369	1	-	hypothetical protein		atggcaatgttaaaaccaaaagaaatggctgaaagattaggtgttacagttagaactttacaaatttgggataaaaagggaactttaaaagctcatcgtactcccactaatcgaagatattatacggaagaacaatacctagaatatattggtcaatcaacgagtaataatcgcaagaatgttgcttatgctagagtatcgacatatgggcaaaaagatgatttaaaaaatcaaattgattttattagacaatatgctaatgccaaaggcgttattcttgatgaaacaattactgatattggaagtggacttaattataaccgtaaaaaatggaatcaattactagaagaagtaatggataatcaagtc	MAMLKPKEMAERLGVTVRTLQIWDKKGTLKAHRTPTNRRYYTEEQYLEYIGQSTSNNRKNVAYARVSTYGQKDDLKNQIDFIRQYANAKGVILDETITDIGSGLNYNRKKWNQLLEEVMDNQV	hypothetical protein
NODE_144_length_2834_cov_102.448768	fig|1578.617.peg.312	1320	421	-	ATPase component of general energizing module of ECF transporters		atggcaattcaacttgaaaaattaagctatacgtatcaagccgagacccctttagcccaacaagctctaaaagacgtaagctttacgatcaaagatcaaagttttacggctattgttggacacactgggagtggaaagtctaccttgttacagcatttaaatggacttttaaagcctaccagtggtcgtttgacggtcaatgggcaggtgatcacgccagcaactaaaaataaagagttagctaagttgcgccaagaagttggtttcgtatttcaatttcccgaagcccaactatttgaagagacggtcttaaaagatatcgcatttgcgccgaaaaattttggtgcgaccgagcaagaagccgaaaaaatcgcgcgtaaaaaagcccaactcgtcaat…	MAIQLEKLSYTYQAETPLAQQALKDVSFTIKDQSFTAIVGHTGSGKSTLLQHLNGLLKPTSGRLTVNGQVITPATKNKELAKLRQEVGFVFQFPEAQLFEETVLKDIAFAPKNFGATEQEAEKIARKKAQLVNLDESVLERSPFELSGGQMRRVAIAGILAMSPKVLVLDEPTAGLDPSGRAEMMALFKRLHEKEKLTIILVTHQMNDVANFSDQVLVMESGRLLADKTPAELFSDPGWLKKHHLNLPQTTAFAQRLVERGMEFAQLPLTEHELAKVLATKIKEAEVTVNKNVELYRMI	ATPase component of general energizing module of ECF transporters
NODE_144_length_2834_cov_102.448768	fig|1578.617.peg.313	2135	1296	-	ATPase component of general energizing module of ECF transporters		atgagtgcaattattgagataaaaaatcttagctttgcgtacgatgaagagagtcaacaaaagacattgtcgcagatcgatttaacgatcgaacaaggacaatgggtcgctttgatcggccataatggaagtggcaagagcactttggccaaattgctcgatgggctattgacgccaactgaggggacgataaccgttgcaggtcttcccttaaatgaagaaaacatttgggagatcagagaccagatcgggatggtctttcagaatccggataatcaatttgtaggcgcagatgttgaaggcgatgtggcctttggcttagaaaatcggggcgtttcctatgagcaaatgcatcaacgagtaaaagaagccttagaagctgtcaacatgcaagctttt…	MSAIIEIKNLSFAYDEESQQKTLSQIDLTIEQGQWVALIGHNGSGKSTLAKLLDGLLTPTEGTITVAGLPLNEENIWEIRDQIGMVFQNPDNQFVGADVEGDVAFGLENRGVSYEQMHQRVKEALEAVNMQAFAKHEPVRLSGGQKQRVAIAGVLAIRPQIVIFDESTSMLDPEGRAELVALMRRLNKEEGFTVISITHDIDEAALADRIIVLEKGKVIDDDMPENIFTRGNELSKVGLDVPYPERLKHELAKLGIKVPKKYLTEKELVDWLWQFNLKN	ATPase component of general energizing module of ECF transporters
NODE_144_length_2834_cov_102.448768	fig|1578.617.peg.314	2264	2797	+	hypothetical protein		atgaaaaaaatcggcatcattatcggcagtacgcgtcctgggcgacgaagccctttgatcgctgaatggttcgctaaaaatctacctcaagctgaactaacttacgatattatcgatctagctgattttgacttacccttcttagatgaaagtgaaatgccccaaactgggacttaccatcatgagacgactaaacgctggagtgaaaaaatcgccacttatgcaggctttatcttcatcgttcctcaatataactggggctatcctgccgtcttgaaaaatgcacttgactatctctatcgcgaatggcaaggtaaaccagcttgcttggtcacttttggcggacacgggggctctcaagcccagatcgccttacgcttagtcatgcaaggactcaaa…	MKKIGIIIGSTRPGRRSPLIAEWFAKNLPQAELTYDIIDLADFDLPFLDESEMPQTGTYHHETTKRWSEKIATYAGFIFIVPQYNWGYPAVLKNALDYLYREWQGKPACLVTFGGHGGSQAQIALRLVMQGLKMPVLSVAPMITLSPSASQSEALNALIAYEPLLPALEAEFKRYLN	hypothetical protein
NODE_145_length_2800_cov_117.462956	fig|1578.617.peg.315	223	20	-	hypothetical protein		atggaaaataaattcgtagttttaacagaaaaagaattaactcttgtatatggtggaaaaggcggaaaaagttgtgttagcaattttttaggcggtttagctgctggggctgctgctggggttccaggtgggatcgttggcatcattggtggagccaatctaggtatggttggcggagcaatttcttgtctacgcagtttgtaa	MENKFVVLTEKELTLVYGGKGGKSCVSNFLGGLAAGAAAGVPGGIVGIIGGANLGMVGGAISCLRSL	hypothetical protein
NODE_145_length_2800_cov_117.462956	fig|1578.617.peg.316	476	213	-	hypothetical protein		atgaagttatggaaatggtggttgctaggtggcattaaaggtaataaacggtacatcattttaccagttttggagtcactagcaattccattcggtatctggtttttgggcaatcgtgatgataattttttacagtttttactgactcctaaaatgatcatcgttatggttatttgtttgataggcggtgggactttgttttatattctagacagtgttgttaggttcaataaaaaaatgagggatgattatcatggaaaataa	MKLWKWWLLGGIKGNKRYIILPVLESLAIPFGIWFLGNRDDNFLQFLLTPKMIIVMVICLIGGGTLFYILDSVVRFNKKMRDDYHGK	hypothetical protein
NODE_145_length_2800_cov_117.462956	fig|1578.617.peg.317	741	595	-	hypothetical protein		ttggttatcataactactaaagaacaatacttagctatttcagagaaaaaattgcaaaatgtgcgtggaggcaaacaaaatcctaaaaagcaacaaactctatgtaacaaagtatttatgcatggtagcattttttgtacaaaataa	MVIITTKEQYLAISEKKLQNVRGGKQNPKKQQTLCNKVFMHGSIFCTK	hypothetical protein
NODE_145_length_2800_cov_117.462956	fig|1578.617.peg.318	760	2034	+	hypothetical protein		atgcttgatacggttttaaattatactttcatatttctccaaggtctgattattgctttattatttgatcaattaaatattatcgacttaagcaaaaaaaatattttatttttgagcatattatcattctttgattataatttgtggggaggaatattatataccataatttttagttttacgatcaattatttttctaggggaaaaatacctgtgttagtaagtattttctatacttcatatctactagtgtcaacagctatcatctatcaattactagataatgttttactcctgatctataacagctataacagtaactatacgctaatgatcattattgaacttattttcttaccttgtgccatatttctacttcaaactgcgttaatgtactac…	MLDTVLNYTFIFLQGLIIALLFDQLNIIDLSKKNILFLSILSFFDYNLWGGILYTIIFSFTINYFSRGKIPVLVSIFYTSYLLVSTAIIYQLLDNVLLLIYNSYNSNYTLMIIIELIFLPCAIFLLQTALMYYFRSYLIYFANNILAKYRNQAVIFDIVLLSYVFLRFSELENKSLIASVILGVLAAYIYLITLYSQGKEIELAKEAQLQNLLEYTLQIEKLYNELRHFKHDYKNILISLEYCLDHDDLAGVKEIYQNAIVPTKSVISLELQIIGQLQNIGDPALKGILSNKLSLALSKKLKVTCEVPEQIFLDSRISQLDMVRILSCLIDNAIEAACESSNKLLSVAFFEHNNEQIIIIRNSTKEKMIPLQSLNKSGFTTKKTGDHGHGLTNIRCILN…	hypothetical protein
NODE_145_length_2800_cov_117.462956	fig|1578.617.peg.319	2037	2798	+	hypothetical protein		atgaatattgctattcttgaagatgaatatattcacacttatcgcttaaccgaaaatatcagtacaattctaaaagaattaaatatttcaacatatgagctcaaaacatttaaaaagtcagattcactgctaaacgatctttttgtccctagtaatcaaaatatttattttttagatttagaacttgaaggaaatgaacaacaaggtttagagataagtaagcttatcagaaaatatgacaactatgcgtcacttatcttctttacttcacactcagaattacttcctttaacttataggtataaagtatctgcactagatttcatcgctaaagatagtcaaactctccttgatgatatcaaggaagatttaaaaatagtcttgaacaaacgtaaaaaa…	MNIAILEDEYIHTYRLTENISTILKELNISTYELKTFKKSDSLLNDLFVPSNQNIYFLDLELEGNEQQGLEISKLIRKYDNYASLIFFTSHSELLPLTYRYKVSALDFIAKDSQTLLDDIKEDLKIVLNKRKKIDSDMFNLQVGTKFINIEFDKICFFESHYANSHASLLWLLDNRELQISKNLHEIEREDHRLVRVHRSFLVNLANVEFIDRTKKLLHFKNDLVCPISRRKLKNIQEQLLSIPRGCDISLQKT	hypothetical protein
NODE_146_length_2612_cov_100.432338	fig|1578.617.peg.320	407	150	-	hypothetical protein		atgggaaaagtcggagtctattttcaagagtggcaaacgacagtaaaaaggaatcaagccgcacttgaccgagtggattctcttaaacaggtagagcttaagaagacagacttaaagcagtttagaaatgtaaatcagacgatcaagcgctttaatcaagcactaaatgcgttgaaagatcagacggtaaatgaaacacaacaactgatccagctagggttaaataagcaaaatgacgatgcacaatacggaaagtaa	MGKVGVYFQEWQTTVKRNQAALDRVDSLKQVELKKTDLKQFRNVNQTIKRFNQALNALKDQTVNETQQLIQLGLNKQNDDAQYGK	hypothetical protein
NODE_146_length_2612_cov_100.432338	fig|1578.617.peg.321	880	422	-	hypothetical protein		atgatagcacatggacaaagcattactgcaaaaaatgttattagtttaaattgcgttgttgatatggaaatgatgaatgcagcatttacagattttatcgataatgtgacccaagcaggctacacacctgtcggaaatgtattttttgctaatggaggcgagttggtgcagactgaggcgatcccgatgcaactttttgtctcagtggaagaagattatcatggtggcttgactgaagagttcaattaccgtacttattttcaagtgagaagagtactgcaaacgcgtgttaaagggatgagtcaattggattttgcacgtgggatggaaactttaggggaagctataacaaaattagatggtgagtatccaaacaccccgacattttttgttttcact…	MIAHGQSITAKNVISLNCVVDMEMMNAAFTDFIDNVTQAGYTPVGNVFFANGGELVQTEAIPMQLFVSVEEDYHGGLTEEFNYRTYFQVRRVLQTRVKGMSQLDFARGMETLGEAITKLDGEYPNTPTFFVFTEFEGEVYTDIGVGLQFEES	hypothetical protein
NODE_146_length_2612_cov_100.432338	fig|1578.617.peg.322	1334	891	-	hypothetical protein		atgagagtagtagcattacatcaagaaaatatgatgaccatcgagcgtcatctaaagagcgaacagttggtagatctagttgaatatatcgacatgatgggatatggcgaaggggtctataagacaggtccagcaatggtatccctgccgactgatcagtttttggcagatgagatcgattttaaggcttatgccccgataagcgttgaggtcgagcttgaggaaaatccttttgattggcaagcgattttggatattcctgaagccgtgacagaaacagttcgctttggagatgagatcaatgatgcctatcaaaagatcattgactttctcaaggaaaaaaatctaccgatcccagaacgattttttatggtgtttaccccgatctatgctgattat…	MRVVALHQENMMTIERHLKSEQLVDLVEYIDMMGYGEGVYKTGPAMVSLPTDQFLADEIDFKAYAPISVEVELEENPFDWQAILDIPEAVTETVRFGDEINDAYQKIIDFLKEKNLPIPERFFMVFTPIYADYWVDFIFPIKPIEEK	hypothetical protein
NODE_146_length_2612_cov_100.432338	fig|1578.617.peg.323	1999	1331	-	hypothetical protein		atgaaaacatctttcagaaaagtgttatatcgatatataagcaaatttagatacaacaagttggaaaatacaatatttataatggtaaacgctagtatattatttttgctttatatagggatcgaagcagaaacattaccatcacgtattattccatatatttatagagacaaattattgatgttttatgtagtcactacgttattgctaatatttttaagaataatttggccttggtatcatcgacttagatatgctggaatcgttgaagtagtatcaaattatgtagatgtgatcataattgcagtattatttgggtgggtaacaggtgctaataaaacatctatgagtattgcagtatctatagttttgttgtttgatgctgttatttttacagtg…	MKTSFRKVLYRYISKFRYNKLENTIFIMVNASILFLLYIGIEAETLPSRIIPYIYRDKLLMFYVVTTLLLIFLRIIWPWYHRLRYAGIVEVVSNYVDVIIIAVLFGWVTGANKTSMSIAVSIVLLFDAVIFTVGAMYKKIAQYMIYVTVIAGLVNIFLYFITDKEVFVNLLGIPAGCILSFKVIPYWLILDTPYRRNLIKEFGPKDIDKSVIFVSKKKERNK	hypothetical protein
NODE_146_length_2612_cov_100.432338	fig|1578.617.peg.324	2611	2018	-	hypothetical protein		gttttgatcgatatcaaagctaatgttgtcaagggcggtgagaagttgaccaaacaattgtatatctacgatactaaaaagatcgcagatcctcttcaaaaagggagcttgaaagtcaaagactatctcaaagaagcaaagagtagtgctttaaaagagctgagttttaaatcaatgttcaaagattttagtaaggccaaaggactaggccgagttgtccctggaataaatatagccagtaagacattatcgctctatgacggtttaaacgaatcgactaagatggcgaataaacataagctgaaaggcaagtggaaagcaatgagtttgattggtggcacagcagttgacctaggtgatatggctgtgactgcaggtctatcgactgttggtagtatg…	VLIDIKANVVKGGEKLTKQLYIYDTKKIADPLQKGSLKVKDYLKEAKSSALKELSFKSMFKDFSKAKGLGRVVPGINIASKTLSLYDGLNESTKMANKHKLKGKWKAMSLIGGTAVDLGDMAVTAGLSTVGSMAGASLGTAALGLFGVTTAPVWLTVGTGAAIATVAAVGVSKILNDMGARKFLKNKWDSFLGKFGS	hypothetical protein
NODE_147_length_2491_cov_5.364117	fig|1578.617.peg.325	627	1	-	Phage protein		atggagcgaagatcacgagctatcttgcaacgtgcagatgatggcggagcgtggttgatggtgaagctagatcatatgcctaatttggatcacattgagactgtgtcaggtagcaaagaacagttctatgttgattgggaacttgcagatacaagacgtgtcagaaagaagcaacggcgcttgttcttcgctctgttgaatgacatcgtggaccacttcgttgtaccacaagatttcttgaaagacatgttctatctgcaataccagtattacacaggcaaagagatcagtttagcagattacacacgatcgagtgtgactgatgctaatgtgttgatcgaattggtagtagatttcatgtttgagtggcatgtaccgtttgccaaaggatatgagcta…	MERRSRAILQRADDGGAWLMVKLDHMPNLDHIETVSGSKEQFYVDWELADTRRVRKKQRRLFFALLNDIVDHFVVPQDFLKDMFYLQYQYYTGKEISLADYTRSSVTDANVLIELVVDFMFEWHVPFAKGYELLPKDEQYFIYQCCRHRVCLICCLPADIHHTDTVGMGVDRNKVDHTQHRVLPLCRTHHQNYHQLGPEKFSELYHVPA	Phage protein
NODE_147_length_2491_cov_5.364117	fig|1578.617.peg.326	1245	646	-	hypothetical protein		atggcatttaaaggtttaacggtagatgaaaataatgtgttaggacgtcgagtggaagaagcaggaacgtataacgtgcgtttgctaccaacatcagaattgaaaactgcaagtactggtaaagaaatgttagtgctgaactatgaagttttagatggtaaatatgcaggaggaacaatcagatttgacaatgtcgtgtatgacgatgaaacgcccgagaaagaagaacaatcattaaagcgatttaacacattgttagttgtggcaggcgttccagctggtactcagatcaaaacactggatatcttgttaaaaggattaaagaaatacaacaaaatgaacgtgacagtagaatggagctctgaaccaaacagcaaagggtactataacttggatgtt…	MAFKGLTVDENNVLGRRVEEAGTYNVRLLPTSELKTASTGKEMLVLNYEVLDGKYAGGTIRFDNVVYDDETPEKEEQSLKRFNTLLVVAGVPAGTQIKTLDILLKGLKKYNKMNVTVEWSSEPNSKGYYNLDVTSHNPTDPEGSKPNGVFAPPRQQAGTGYSAGNQSAVEQAAANLPKHFDADPFAGAGQVISDDDLPF	hypothetical protein
NODE_147_length_2491_cov_5.364117	fig|1578.617.peg.327	1962	1264	-	prophage Lp2 protein 17		atgcgatttttcacaccgggaaatttccccgagcaccataatatgtattttatctatggcgacggtgggacaggtaagacaagcttactaaagcaatttaagggcaataaagcactatttagttttgacctatcatacaacgctgttaaggatactggtgatatcacacttgctgttcttgaaggaacagatattccaattattcagcgtgttgtgtgggataacttggtagcggcggtcaacagtccaaatattgacgtaatttgcttggataatgtaacagcactacaaaattacgtgctagacaacatcgagcatgcagctaaagataatcggcagaactataacgcaatgcagaaatggttcagagatcttgccacattgctaagacgatctaac…	MRFFTPGNFPEHHNMYFIYGDGGTGKTSLLKQFKGNKALFSFDLSYNAVKDTGDITLAVLEGTDIPIIQRVVWDNLVAAVNSPNIDVICLDNVTALQNYVLDNIEHAAKDNRQNYNAMQKWFRDLATLLRRSNKTIYATAHAIDKGKNGIDEQGRYEADMNIKTFNAFTSMFDLVGRIYIKDGKRWIDLDPEQENHAKNRIDDRTLIKAEELVEAKPTEEFTVEEPKTKKAS	prophage Lp2 protein 17
NODE_147_length_2491_cov_5.364117	fig|1578.617.peg.328	2273	1965	-	Phage DNA binding protein		atgacgtttgaagaaatcaatgagcgactaaaaaaatgggctgatgatcgtaatattggtgagtattcagataagcagattatgaagctatttgaagaaatcggagaactttcagaagcaatcaataagaatatgagcgaacaagaaattgacgctgttggtgatattcaagtagtgctgattatcttatgttatcaacgtgggcttgatcctatcgagtgcttgaacaatgcttacaacgttatcaaagatcgaacaggcaagactatcaacggtacgttcgttaagtcagaagatctggagggataa	MTFEEINERLKKWADDRNIGEYSDKQIMKLFEEIGELSEAINKNMSEQEIDAVGDIQVVLIILCYQRGLDPIECLNNAYNVIKDRTGKTINGTFVKSEDLEG	Phage DNA binding protein
NODE_147_length_2491_cov_5.364117	fig|1578.617.peg.329	2490	2278	-	hypothetical protein		gcgttagttgagcaagaaaaagaaaagctagttgaagctaacggtaagcaaatcgattcagaaacgggagaagtggtccgagagttgcagattgtatctttcaaactgaaaggcactaagcaagacttagacaatttagccgttgcaattaaaaacagtgctattgaagtattagaagcttccgaacgtgagcttgtcattgaaaggaagtga	ALVEQEKEKLVEANGKQIDSETGEVVRELQIVSFKLKGTKQDLDNLAVAIKNSAIEVLEASERELVIERK	hypothetical protein
NODE_148_length_2490_cov_103.630037	fig|1578.617.peg.330	272	475	+	hypothetical protein		gtgaaaaacaacaataatatttttatagggatcatagtcgtgatcatcttcatcatcttattgatggtgggactttcagaattgagctcactggcagagataaatagtagatcacaacaacaaatagagcatagttctagaaaaaaatttcaaagtaaaataagcattagcgacagtgtgaataagtttttagtgatcttttag	MKNNNNIFIGIIVVIIFIILLMVGLSELSSLAEINSRSQQQIEHSSRKKFQSKISISDSVNKFLVIF	hypothetical protein
NODE_148_length_2490_cov_103.630037	fig|1578.617.peg.331	545	664	+	Purine trans deoxyribosylase (Nucleoside deoxyribosyltransferase-I) (EC 2.4.2.6)	2.4.2.6	ttgttaaagggtggtaataagatggcaaaaacagtatattttgcagctgggtggtttacaccaaagcaaaatgcagcctatgaacaagtaatggcgcgatcaagaaaaacaagacgataa	MLKGGNKMAKTVYFAAGWFTPKQNAAYEQVMARSRKTRR	Purine trans deoxyribosylase
NODE_148_length_2490_cov_103.630037	fig|1578.617.peg.332	715	1035	+	Nucleoside deoxyribosyltransferase (EC 2.4.2.6)	2.4.2.6	gtggatgaacaccctgaattactagaagataaagaatggcaaatagcaacgttcaacggggactgtgtcgggatcaagagttcagacatcttcttatgtacttatctaccagatgaagaagatatcggttgcggggtcgagttaggcttagccaagagtttaggcaaatatatcgtgttggtgatcccagatgaagattacggtaagccaataaacttgatgagttttggcgttgctgatacagtcatcaaagtctctgaattagcggattttgatttcaataaaccatactacaacttctatgaaggggcagtatattag	MDEHPELLEDKEWQIATFNGDCVGIKSSDIFLCTYLPDEEDIGCGVELGLAKSLGKYIVLVIPDEDYGKPINLMSFGVADTVIKVSELADFDFNKPYYNFYEGAVY	Nucleoside deoxyribosyltransferase
NODE_148_length_2490_cov_103.630037	fig|1578.617.peg.333	1461	1114	-	hypothetical protein		atgctggtagctactgctcgaaaaatcgattcaataccagcatggaagagcgtaaagtatccaagtgtcgttaaaaatatcatgcagatcccagatgataaacaactcataatggggatcgcactaggttatcgcaaccaagcgacaaagatcaacgttttttatactgagcgcagtgaagttgataagtttttaacttatagagacgatccaaagaggccctaccacgatgccaatggtagggcctctttggatcatctcatgctctttagtttaagttatccaaatactgttcgccccgatcgcataatgctactacgagcgaaactatactattccccaatttag	MLVATARKIDSIPAWKSVKYPSVVKNIMQIPDDKQLIMGIALGYRNQATKINVFYTERSEVDKFLTYRDDPKRPYHDANGRASLDHLMLFSLSYPNTVRPDRIMLLRAKLYYSPI	hypothetical protein
NODE_148_length_2490_cov_103.630037	fig|1578.617.peg.334	2353	1640	-	Ribosyl nicotinamide transporter, PnuC-like		ttgacaaacacttggctttataagcaattatttaccaattggaagaaatttgaagttacctatgtcagcattttgatcttgatccaactagccgtcttttggatcgtccccgatagcttgatcggtatgatctcgggggtcacaggtacgttatcactggtttacgggatgaaaggacgcaagatcgcctttatctttgggacgatccagtgtctagccatgacttatatcgcttggatcagtcatgcctatggttcatttgcaatggacatcttctatgtcatctcgcaacccatcggctggttcatgtggggccacgaccaagcaacgcatcgtttttcgcctgctagtcgcaaaaaactctttgttggggcttttgtcgcttggctcatcggctgg…	MTNTWLYKQLFTNWKKFEVTYVSILILIQLAVFWIVPDSLIGMISGVTGTLSLVYGMKGRKIAFIFGTIQCLAMTYIAWISHAYGSFAMDIFYVISQPIGWFMWGHDQATHRFSPASRKKLFVGAFVAWLIGWWILALLHGQLPYFDSINFVVSFIAQLLYILKYQENWSLWIVVNLANILYWSILSIQVMTGATDIGSLGAYLSQVALQAALLFNSIYATKVWASGEADNEGGTKS	Ribosyl nicotinamide transporter, PnuC-like
NODE_149_length_2457_cov_119.978960	fig|1578.617.peg.335	735	19	-	Transcriptional regulator, ArsR family		atgaattcgcctgacgttacaactatcttgcgccttttatctgatagatccagaatcacgatcttagatattttaatggatggtcgtgcctatacagtaaatgagataacagcttttactaagttaaaacaacatactgtcagttatcacttaaaattgttaacagaagcaaagctgaccgctgtcaaacaatatggtaagtttagatattactctatctcaaacaccatgacacctgagttatttgagttcttaagtaattattcccccgttgaacctacaaaaagttataagcaacattttgccaaaaaagaattgaagcaagctagaacttgttacgatcatatagctggggaactaggagttaagatcaaagacttccttatttccgagaatatt…	MNSPDVTTILRLLSDRSRITILDILMDGRAYTVNEITAFTKLKQHTVSYHLKLLTEAKLTAVKQYGKFRYYSISNTMTPELFEFLSNYSPVEPTKSYKQHFAKKELKQARTCYDHIAGELGVKIKDFLISENIIIAANDNSGIYSVTPSGEIFFAEELKINIENLKKKKRKFCIDCLDWSERKNHLAGALANAILDFLLNNDYVTQATGSRALKITDTGEKFFKDNWHIILTQNDLSQ	Transcriptional regulator, ArsR family
NODE_149_length_2457_cov_119.978960	fig|1578.617.peg.336	972	1103	+	hypothetical protein		gtgaacttcgatcttggtgagctgacagatttcttgacatttgagcaaaagtttacgaaattacacaaatatgaaaattgcccagtttgtggaaaggaatttagaaataatggaaaccttgagagtagctag	MNFDLGELTDFLTFEQKFTKLHKYENCPVCGKEFRNNGNLESS	hypothetical protein
NODE_149_length_2457_cov_119.978960	fig|1578.617.peg.337	1174	1806	+	ABC, transporter, ATP-binding protein		ttggggatcttgggtgttaatggggctggtaaaacaactaccttaaagatgatctactcagcaaataagataacaagtggtgatgtatacattttaggaaaaaatatttcaacgttagctgatagggggaagaccaacttagggatcgtagctcaagaagatatgttagatacgactttgactgtctttgaaaatttgatcgcacatggtatatgttatgggatcaaattaggggaacttaaagctcgaacgcaaaagctactaaaattcgtccaattagctgaatatgcaaataaaatgatcagtgaactatcaggcgggatgaaaagacgtgttgttcttgcacgcgctttattaaatgagcctgagatgatcatactagatgagccgacggtcggt…	MGILGVNGAGKTTTLKMIYSANKITSGDVYILGKNISTLADRGKTNLGIVAQEDMLDTTLTVFENLIAHGICYGIKLGELKARTQKLLKFVQLAEYANKMISELSGGMKRRVVLARALLNEPEMIILDEPTVGLDIQSRNIIWNKLKMLKKQGVSIVITSHYMNEIEFLADRLLIIDSGVIKDEGTVTGLLDKYQEKDMEELFLRLTNNK	ABC, transporter, ATP-binding protein
NODE_149_length_2457_cov_119.978960	fig|1578.617.peg.338	2005	2448	+	ABC-type multidrug transport system, permease component		atgtttagagtttcacctagatcagtttactatgttatcatcagaaactatatgagttttagatctctatttaagatctcgatagttcctaacttgatcgatcccttattttatttaatagcgatgggatttggcgtcggagcttatctgaccaatatcaatgggatgtcgtatactacttttgtcattacaggacttatcggtgctacggcaatgactactgctacatcagaagcaacagtcaatgcatttattcaatataaaattgaaaaaacatatgctgctatgttaatgacaccgatcaacttacaagatattgtaattggccaagctatctggtcaggtgttagagctatcatctttggggggatattttggcttgtttcacttgttataagc…	MFRVSPRSVYYVIIRNYMSFRSLFKISIVPNLIDPLFYLIAMGFGVGAYLTNINGMSYTTFVITGLIGATAMTTATSEATVNAFIQYKIEKTYAAMLMTPINLQDIVIGQAIWSGVRAIIFGGIFWLVSLVISQTYNLYMSQFVKLS	ABC-type multidrug transport system, permease component
NODE_14_length_27173_cov_97.354606	fig|1578.617.peg.339	900	67	-	Pur operon repressor PurR		ttgaaaaccagaagaagtgatcgattgatcgatatgacgagatatctcttagaatcaccgcatacattgatctcgctgaccttttttgctgaacgctatgaatcagcgaagtcttcgatcagcgaagatcttgccattattaagcgaactttcaaattacgtgggatcggtattttagagacgatcccaggtgcagcaggtggtgcgcgctttattccttcaatggaagaatatgaagctcgtgaatttattgaagagatgacagccgaactttcagaacaagatcgccttttaccgggcggatatgtatacttgtctgatcttttaggccgacctgatgttttacgtaaagttggacgcgtgatcgcacgccaatatatcgataaacagatcgatgcg…	MKTRRSDRLIDMTRYLLESPHTLISLTFFAERYESAKSSISEDLAIIKRTFKLRGIGILETIPGAAGGARFIPSMEEYEAREFIEEMTAELSEQDRLLPGGYVYLSDLLGRPDVLRKVGRVIARQYIDKQIDAVMTVATKGVPIAQSVSSYLNVPFVIVRRDSKITEGSTVSVNYVSGSSERIEKMELSKRSLKRGSNVLVVDDFMKGGGTVNGMKSMIEEFESNLVGITVFAEGSFDGKRMVDDYTSLLKVDQVNTLDKTISVSPGNYLEKVFGNK	Pur operon repressor PurR
NODE_14_length_27173_cov_97.354606	fig|1578.617.peg.340	1271	2485	+	Argininosuccinate synthase (EC 6.3.4.5)	6.3.4.5	atggcaaataaaaaggtcgtactcgcatattctggtggtttagatacttcagttgagatcgcttggctcaaaaataagggctacgatgtgatcgcttgttgcattgatgttggtgaaggtaaagacctagctgctatccaagaaaaaggtttaaaagtaggcgcagttgaatctttagtcattgatgctaaagaagaatttgctagtcaatattgtttaacggcactccaagctcatacatattatgaacaaaaatacccgctcgtttcagcactctcacgtcctttgatcgttaaacacctagtcaaagtcgctaaagcccacaaagcatgtgcgatcgcgcatgggtgtaccggtaagggcaatgaccaagttcgctttgaagttgggatccatgcg…	MANKKVVLAYSGGLDTSVEIAWLKNKGYDVIACCIDVGEGKDLAAIQEKGLKVGAVESLVIDAKEEFASQYCLTALQAHTYYEQKYPLVSALSRPLIVKHLVKVAKAHKACAIAHGCTGKGNDQVRFEVGIHALAPEMLIEDPIRDNHWSREEEIDYALQNNIPVPINKKSPYSVDENLWGRANECGILEDPWQSAPKDAYARTLPLEQTPDVPSVIELEFDQGVPVKLAGEKLKLADLILKLDRLAGQHGIGRIDHVENRLVGIKSREIYECPAATVLMAAHKDLEDITLEKEVAHFKPVIEQKLSELIYNGLWFSPLMPALQAFLKQTQTNVTGVVRVKLFKGNVICEGRRSPNSLYDEKLATYTAADQFDQEAASGFIKLFGLPTQVYAQVQQKNG…	Argininosuccinate synthase
NODE_14_length_27173_cov_97.354606	fig|1578.617.peg.341	2478	3863	+	Argininosuccinate lyase (EC 4.3.2.1)	4.3.2.1	atgagtgataagttatggggtggacgttttgaagcgtccccggatcaattcgttgatgaatttggggcttcgatcagttttgatcagttgctagcaaaagaagatatccaaggttcacttgcccatgtaaaaatgctcaaacacaccaagatcttgagtgcaaacgaagcagatcagataattgcgggactagaaaagttagcacacaaactaactacgggtgaacttgaattttcagttgcaaacgaagatatccatatgaatttagaggctctgttagcccaagagatcggcccagttgcaggtaaacttcataccgctcggagtcgaaatgatcaagttgcgaccgatctacatctttatttaaaaaagcgccttccccaagtattagaggcgatc…	MSDKLWGGRFEASPDQFVDEFGASISFDQLLAKEDIQGSLAHVKMLKHTKILSANEADQIIAGLEKLAHKLTTGELEFSVANEDIHMNLEALLAQEIGPVAGKLHTARSRNDQVATDLHLYLKKRLPQVLEAITGLQKALLCQAKKHQTTLMPGFTHLQHAQPITYAHYLMAYWQMFKRDYERFLFNQKHTDICPLGAAALAGTTFPIDRKFSADQLGFSEIYANSLDAVSDRDFALEFLSNSSILMVHLSRFCEELILWCSYEFGYLELSDKFATGSSIMPQKKNPDMAELIRGKSGRIFGDLIGLLTVLKGLPLAYNKDMQEDKEGVFDAVKTIIPCLKICTQMVETLSVNKERMEHVLTTDFSNATELADYLAKNGVPFRQAHAIAGKLVLHQIKQ…	Argininosuccinate lyase
NODE_14_length_27173_cov_97.354606	fig|1578.617.peg.342	3971	5104	+	Glycerate kinase (EC 2.7.1.31)	2.7.1.31	gtgaaaatcatcattgcacccgattctttcaaagaaagtatgactgccagtgaagcagcccaagctatctatgctggctttaaacccatctttcccacagctacatatgaattgatcccactagcagatggaggagaaggctttgtcgatacgatcttaaatactgttcctggaaaaatttattcctatcaagtaatgggaccaagaaaacaaacagttacagcaaaattggccgtgatcgatgcgggcaaaactgcactccttgagactgcggctgctagcggactacatctttgtaacggtataaaagatcctctgacggctactagttacggaacaggcgaattgctcaaacatgctttagatcttggtgtagagcatatcatcttaggtcttgga…	MKIIIAPDSFKESMTASEAAQAIYAGFKPIFPTATYELIPLADGGEGFVDTILNTVPGKIYSYQVMGPRKQTVTAKLAVIDAGKTALLETAAASGLHLCNGIKDPLTATSYGTGELLKHALDLGVEHIILGLGGSATNDGGAGLLQALGAKFYDRFDYELPLGGIHLQALKKIDISTLDPRLQTTKITLASDVASPFIGPNGASMVFSPQKGASPEAVIQLEQALTNFSQIIKATYGQDIATTPGAGAAGGIGGALFAFTNATLTPGVELAIALTDLKQKATASDILLTGEGSLDSQTKLGKTPLGVLRAVRAVSPDCTVIGLAGKIEAVFELHQLGFDAVFSCTPGIIDLDQALKLGPKHLTQTANEVAHLLQKFV	Glycerate kinase
NODE_14_length_27173_cov_97.354606	fig|1578.617.peg.343	5182	6057	+	Diphosphocytidyl-sugar kinase		atggagatatcggagaaagctccggctaaattgaacttcagcttagataccccatttcgtcatcaaaacggtgagccagaatggaaaatggtaatgatcgcagttgatttagccgattacgtacacatccagacccttcctaactcgcataagataaccgtctcgactgactctggttttttaccaagtgatcaacgaaacttagcctatcaagccgctaagatgttgcgcgataaataccagatcaatgaaggcgtagcgatctcgatcgataaaaatatccccgtagctgccgggatggggggtgggtcttcggatgctgcggctgtcctacgtggcttaaacaagttatggcaacttggactctcacgcaaagaacttgctaagatcgggctagag…	MEISEKAPAKLNFSLDTPFRHQNGEPEWKMVMIAVDLADYVHIQTLPNSHKITVSTDSGFLPSDQRNLAYQAAKMLRDKYQINEGVAISIDKNIPVAAGMGGGSSDAAAVLRGLNKLWQLGLSRKELAKIGLEIDSDVPFCIYSEPAFVTGKGEIVIPIGPLPPLKLIIAKPRDSVSTPSILRKIDYDKIKHQDVDAVVCAIKAQDYATMVTKMGNTLEPITARRHPEILKIKEKMLQFGCDAAQMSGSGPTVFGVCQKASRAQHIYNSLRGFCKEVYIVSPYNLDQQTCF	Diphosphocytidyl-sugar kinase
NODE_14_length_27173_cov_97.354606	fig|1578.617.peg.344	6977	6114	-	Cell surface hydrolase, membrane-bound		ttgaaaaaatggtgggtgattttaggcagtgttttagtcgggctgatctgcctccaattatggcttttacgtggaacacctggagaagcattacgcacgaaacagttgcgttcggatattgcgtatagcgatgttccaacgctcctagtcccggggtggggtgggaatggttggacttacagtaaattgatcaaatactaccaaaaagaaaatatcgcacaaaagacgatgacgatccatgtgacgccaacgggtaaggtcaaggtccaaggtagtgtagccaataagaaaaatgctttgatccaattgatctttgattggaattatacaaaagattaccaaccacagacaaagtggctgcaacaggtacttacacgcttgcaccgtgatcatcatgtc…	MKKWWVILGSVLVGLICLQLWLLRGTPGEALRTKQLRSDIAYSDVPTLLVPGWGGNGWTYSKLIKYYQKENIAQKTMTIHVTPTGKVKVQGSVANKKNALIQLIFDWNYTKDYQPQTKWLQQVLTRLHRDHHVDKLNVIAHSWGGSALIHALADSSLLQKEIAFPKVILLGTPIDESVDENTSYAKAQAKASTDKNYQRLLKKFKEFDPLASIDFYNLMGSVDGEKTDGSVPNVQSLFLKNIIHPNWSKYYQAVYTNTDHTDLHQSAKVLDTMDKILWNNRPLAWHH	Cell surface hydrolase, membrane-bound
NODE_14_length_27173_cov_97.354606	fig|1578.617.peg.345	8175	7156	-	Lipoate-protein ligase A		atgcagtatctagtaatgcaaactgatgatatcagaactaacttagcaacggaacagtatttgatgaacagtggtaaattggaagcaccatttatgctgttttatatcgaaaagccttgtatcatcgtaggtcgaaaccaaaatacaatggaagagatcaatcagaaatattgtgaagataacaagatcacgatcacccgtcgcctttccggtggtggtgcgatgtatcaagatctaggcaatatgtgttttagctttgtcgtaccagctaaagatcaaaagtttggtgattttaagacattggtccagccgatcgtcaaagcattgcatgagatgggcgctaccaaagctgaggtgacagggcgcaatgatatcgtgatcgacggcaagaaattttct…	MQYLVMQTDDIRTNLATEQYLMNSGKLEAPFMLFYIEKPCIIVGRNQNTMEEINQKYCEDNKITITRRLSGGGAMYQDLGNMCFSFVVPAKDQKFGDFKTLVQPIVKALHEMGATKAEVTGRNDIVIDGKKFSGNAMYTKGDKTFSHGTLMFDVDTSAVENALRVSKDKIESKGVKSVRSHVTNIKPYLDKQYQALDTFAFRDELIKKIWQVDSLEQAQKFEYHLDETDKAEIAKIEQELYKNWDWVYGRSPEFTVQKRHRFTGGTIDARFLIDNGVITSVKIYGDFFGKKDVGEVEALLAGVKYAPAEIRQALAKLDLTQYFAGIPTEEIVELLAVQK	Lipoate-protein ligase A
NODE_14_length_27173_cov_97.354606	fig|1578.617.peg.346	9606	8200	-	Dihydrolipoamide dehydrogenase of pyruvate dehydrogenase complex (EC 1.8.1.4)	1.8.1.4	atggtagttggagatttttcaattgaattagatacagtcgtgatcggtgcgggccctggtgggtatgtagctgcgatccatgcagctgaattaggccaaaaagtaaccgtgatcgaacgtgaatttatcggtggtgtttgcttgaacgtaggttgtatcccatcaaaggccttgatcgaagcagcacaccactaccaatacgcaatgcactcccaagatatgggactccaagtaacagcagctaaacttgatttcaataaaacgatcgagtggaaaaatagtgttgtttctaagctcactggtggggtcgcatcactatttaagaagcatcagatcgatgttgtttggggtgatgctttcttgaaagatgatcacaatttacgtgtgatcgataaagaa…	MVVGDFSIELDTVVIGAGPGGYVAAIHAAELGQKVTVIEREFIGGVCLNVGCIPSKALIEAAHHYQYAMHSQDMGLQVTAAKLDFNKTIEWKNSVVSKLTGGVASLFKKHQIDVVWGDAFLKDDHNLRVIDKEGHAQTYSFNNLIVATGSHPIEIPNFKFKGRVLDSTGALNLREVPKELVVVGGGYIGCELASAYANLGSHVTILEGGPMILANYEKDLVKVVEHHFSKQGVDIYTNALAKNAEQTDDNIKVTFEIDGKAQEIMADYVIVSVGRRPNTADMGLEQAGVKVDERGLIPVDAQSRTNIPHIYAIGDIVAGFALAHKASYEGKVAAEAISGMKTTVDYRAMPAVCYTDTSIATTGLTLAEAKEKGFKAKKAQFPFAANGRAISMGKTDGFI…	Dihydrolipoamide dehydrogenase of pyruvate dehydrogenase complex
NODE_14_length_27173_cov_97.354606	fig|1578.617.peg.347	10898	9612	-	Dihydrolipoamide acetyltransferase component of pyruvate dehydrogenase complex (EC 2.3.1.12)	2.3.1.12	atgagtaaatatcaatttaagctcccagatattggggaagggatcgctgaaggtgtcattggtgaatggcacgttaaagtcggcgatacgatcaaagaagatgacgatctagttcaaatcgaaaatgataaatccgtcgaagaaattcctagtcctgtagccggaaaagtaactgcgatcgtagttccagaaggtgaaacagctgaagttggcgatgttttagtagagttagaagttgcagaagggttaggcaacgttgatgatagtgcgacaaagacaccagctaaagcagaagaaaaaactcaaccagccccagagccagtcgctgaacaaacaagcaaagcgcctgttgaagtatctgtgcaagatcactccttaccagttttagcgatgccgtca…	MSKYQFKLPDIGEGIAEGVIGEWHVKVGDTIKEDDDLVQIENDKSVEEIPSPVAGKVTAIVVPEGETAEVGDVLVELEVAEGLGNVDDSATKTPAKAEEKTQPAPEPVAEQTSKAPVEVSVQDHSLPVLAMPSVRKFARENGVELAKIKGTGRHGQVTKADIEQALSLPQDAPVAAPETKTEEPVVALPASASATWPETVEKMSPIRKATANAMVRSVSQIPHVHVFDEVVVDKLWDHRKKYKELAATRGVKLTFMAYMVKALAVIMKEFPIFNSSVDMQNQTIAYKDYINVGIATDTDHGLFVPNVKHADALSLFGIAEQISNNTAKAKENKLARDDMNHTGMSITNIGSVGGGFFTPIINWPEVAILGMGKITKEAVVVDDEVQIARVLKLSLAFDH…	Dihydrolipoamide acetyltransferase component of pyruvate dehydrogenase complex
NODE_14_length_27173_cov_97.354606	fig|1578.617.peg.348	11891	10914	-	Pyruvate dehydrogenase E1 component beta subunit (EC 1.2.4.1)	1.2.4.1	atggctaaaacaacgatgatcaaagcaattacacaggctttggaagatgaattgaaacgtgataaaaatgttttggtatttggtgaagatgttggtcgaaatggtggtgttttccgtgctactgatggcttacaagaaaaagtcggtgaagatcaagtctttgatacgcccttagctgaatcagggatcggtggtcttgcagttggcttagctttgacaggttttcggcctgtacctgagatccaattctttggttttgtatttgaagttatggatgagatcgccgctcagatcgctcggacacgtttccgcttaggtggtacccgtaaaatgccagtgacgatcagagctccgtttggtggtggggtccatacgccagaattacactcggatagtttg…	MAKTTMIKAITQALEDELKRDKNVLVFGEDVGRNGGVFRATDGLQEKVGEDQVFDTPLAESGIGGLAVGLALTGFRPVPEIQFFGFVFEVMDEIAAQIARTRFRLGGTRKMPVTIRAPFGGGVHTPELHSDSLEGLMAQTPGLKVVIPSDPYDAKGLLTAAIRSDDPVVFLEHMKLYRSFKQEVPDEAYTVALDKAAIKREGKDVTIISYGYMVHESLLAADELAKEGIEAEVVDLRTVSPLDEETILGSVKRTGRVVLVQEAQRQAGINSQVAALIAEKGILSLEAPIARVDAPDTPYPFSDAETIWLPNKQDIIEKVKETVNF	Pyruvate dehydrogenase E1 component beta subunit
NODE_14_length_27173_cov_97.354606	fig|1578.617.peg.349	12991	11891	-	Pyruvate dehydrogenase E1 component alpha subunit (EC 1.2.4.1)	1.2.4.1	atggcacaaaaaattgattttgaagcgttaaagacgatctctcctagtgaaattaaaccgcttcaagttttggatgaaaatggcaaagtgatcgatccaaactttttcccagatttaagtgatgaacagatcgtggaattgtttaaacaaatgttatggtcacgtgtattagacgaacgttctaccaagttgaatcgtcaagggcgtttaggcttttttgctccaactgctggggaagaagcttcgcagatcgcgtctgaatttgcgatggaaaagacagatttcttattacctgcttatcgtgatgttccgcaattagtcttacatgggttacctttggaaaaggctttcttatggtcgcgtgggcatgttttaggaaatgaatatccagaagatcta…	MAQKIDFEALKTISPSEIKPLQVLDENGKVIDPNFFPDLSDEQIVELFKQMLWSRVLDERSTKLNRQGRLGFFAPTAGEEASQIASEFAMEKTDFLLPAYRDVPQLVLHGLPLEKAFLWSRGHVLGNEYPEDLAALPPQIIIGAQYVQAAGVALGFKKKGAKNVAYTYTGDGGTSQGDFYEGINFAGAYKAPAIFVVQNNGYAISVPRAVQTAAPTLAQKGLAAGIPGLQVDGMDALAVYLVMSEARKYSVAGNGPVLIETLTYRFGPHTLSGDDPHRYRTADEEAKWKKKDPLVRLRTYLDEKGLWSEEQEEAYIEEVNEQINEAMKKTEQAPKQKVSEYLQNVFVETPPTLEEQIAKFAAKEEA	Pyruvate dehydrogenase E1 component alpha subunit
NODE_14_length_27173_cov_97.354606	fig|1578.617.peg.350	13340	13459	+	hypothetical protein		atgacacgccgtaatgattccaagctcgaacatcggctcgaagaaaaccgtctaaacgatgctagacgtcgtgagaacgaagaaaaagaacaagaagcgaaaaaacatcgcgaaaaataa	MTRRNDSKLEHRLEENRLNDARRRENEEKEQEAKKHREK	hypothetical protein
NODE_14_length_27173_cov_97.354606	fig|1578.617.peg.351	13531	14889	+	Uncharacterized MFS-type transporter		atggaactcaccgaaactaagcgaaaactatttatttttaccctattagcaggtacttttaccatgtcgatcagtcaatcagcgctttcaacggcttatcctgccctgatgcacttctttacggtcgatgccgcaacgatccaatggttgacgaccggttttatgttaatgatgtgtgtgatgatgccagtcagcccgtggcttctcaataatatttcttttaaatatctctatctcagtgtcttggccctttttgggatcggcactttaatgataatttttgccccaactttttggtttgcactattagggcgcttattagaagctactgctgtcggtatcttatttccgtcatttcaaactgttttgatgacgatcacccctaaagacaagcggggg…	MELTETKRKLFIFTLLAGTFTMSISQSALSTAYPALMHFFTVDAATIQWLTTGFMLMMCVMMPVSPWLLNNISFKYLYLSVLALFGIGTLMIIFAPTFWFALLGRLLEATAVGILFPSFQTVLMTITPKDKRGQTMGAAGLVMGSALAVGPIISGIVLNFLRWQALFWLFCFLMLVIFLAACVTISDVMEQKPSQLDVFSLFYEGAGLGMVLYALTAFKDPAHLLSSVLLLLLGLGLLIAFCQRQLKLATPLLELRIVKYLAFDIGLLLTGLSYMSLIVVTIVFPLYYQKILGLSPLASGLSLVLPAVLLSVLNPITGKLADKWGFKPVLLVGVSMLLSGWAGLLLWQDHLGLPLLIAFSMVIEGGNAFVMMPATTLGANSVPKNLIAHATALTTTIRQ…	Uncharacterized MFS-type transporter
NODE_14_length_27173_cov_97.354606	fig|1578.617.peg.352	15232	14999	-	Veg protein		ttgccaactacattagcaaaaatcaagagtaagctcgacaattgcattggcgctggtttaacggtaacgtcccacgttgggcgcaaaaaagttactaaacgtcatggaatcttgcgggaaactttccccgctgtatttatcgtagaattaagtcacgaaaaaaatgccgttgaacgcgtatcatatagttacaccgacgttttgaccaataatatcattctagattttgattaa	MPTTLAKIKSKLDNCIGAGLTVTSHVGRKKVTKRHGILRETFPAVFIVELSHEKNAVERVSYSYTDVLTNNIILDFD	Veg protein
NODE_14_length_27173_cov_97.354606	fig|1578.617.peg.353	16221	15325	-	SSU rRNA (adenine(1518)-N(6)/adenine(1519)-N(6))-dimethyltransferase (EC 2.1.1.182)	2.1.1.182	atgaataatcaattaccagagatcgcttcaccaactagaacgcgggcgatcatggagagttatggtctgacatttaaaaagagtttaggacaaaacttcttaactgatatcaatattttaaataagatcgtggcagctgctgacgtaacgccagaagatgacgtgatcgagatcggaccagggatcggtgctttgactgaacagttggcaaagaatgcacatcaagtcatggcgctagagatcgatgaccgtttgatccctgttttagccgacactttggcaccttatgataacgtgacagtcgttcatcaagatgtacttaaagccgatctagtagaattgatcgctaaaaattttgatggaaaacataagatcaagttggtggcgaatttaccatat…	MNNQLPEIASPTRTRAIMESYGLTFKKSLGQNFLTDINILNKIVAAADVTPEDDVIEIGPGIGALTEQLAKNAHQVMALEIDDRLIPVLADTLAPYDNVTVVHQDVLKADLVELIAKNFDGKHKIKLVANLPYYITTPIILHLLEAPVDFDRIVVMMQKEVADRLAAVPGTKDYGSLSVAVQYEMDAKVAFIVSKTVFIPQPKVDSAIIVLEKKAVQTHEPVDEKFFKQMVKGIFLHRRKSLWNNLQGMYGKTPETKEKMQTALAKVEIEPGIRAEKLTIAQMVELADALVNEKIIKK	SSU rRNA
NODE_14_length_27173_cov_97.354606	fig|1578.617.peg.354	16795	16214	-	Ribonuclease M5 (EC 3.1.26.8)		atgacagataagatgaagatcaaagaagttatcgttgttgaaggtaaagatgatactaagcggatcaacttagccgtcaatgcagatacccttgaaactagagggtcagcgatcagtgatgagacactcgcacagatcgaagaattacatgacaaacgtggggtcattgtctttactgaccctgatttttcaggtgaaaagatccgtaagatcatccaagaagctgttccaggggtcaagcatgcctttttgactaaaaaagctgctgctccagatcacaaggggagtcttggcgttgaacatgctgatccagaggcgatccgggaggctttacgtaatttatatacagaagagccaaatgcgacgccaatgatcagtcgtgaagatctagcagtagcg…	MTDKMKIKEVIVVEGKDDTKRINLAVNADTLETRGSAISDETLAQIEELHDKRGVIVFTDPDFSGEKIRKIIQEAVPGVKHAFLTKKAAAPDHKGSLGVEHADPEAIREALRNLYTEEPNATPMISREDLAVAGLISGPKAKIRRRILGEYLRIGYVNGKQLYKRLNLFQITPEEFAAALRYLEQVEEGKIDE	Ribonuclease M5
NODE_14_length_27173_cov_97.354606	fig|1578.617.peg.355	17559	16792	-	Uncharacterized metal-dependent hydrolase YcfH		atggagatttttgattcacatacacatatcaatgctactgaatttaaaaatgatattcctgatgtgatagagcgggcccaagctttagatgtgaccgaaatgttagtcatcagttacgataccccgagtacggagcgcatgcttgatctagttgaaaaatatccaaatatttatggggcatttggctgtcatcccgaaagtgctttagactacgatgcaaattttgaaagcagatcacgcgaggtcttggcgcacccgaaagtaaaagctctcggtgagatcgggcttgattatcattgtgatgtgcctaaaaaagtccaatgggaagtttttgaacgtcaaataaagctcgcacatgaattacaacttccgataagtatccatgatcgggatgcgatc…	MEIFDSHTHINATEFKNDIPDVIERAQALDVTEMLVISYDTPSTERMLDLVEKYPNIYGAFGCHPESALDYDANFESRSREVLAHPKVKALGEIGLDYHCDVPKKVQWEVFERQIKLAHELQLPISIHDRDAIADCYAILKEADIAKIGGIMHSFNGDADWAEKFLDLGLELSFSGVVTFGNAKEVKQAALMTPLEHMLVETDAPYLTPMPFRGKINEPAMTRYTLEFLAKERQIAPEKLAQITTANAKKVLKIK	Uncharacterized metal-dependent hydrolase YcfH
NODE_14_length_27173_cov_97.354606	fig|1578.617.peg.356	19649	17619	-	Methionyl-tRNA synthetase (EC 6.1.1.10)	6.1.1.10	atggctgataaacagacatattacattacaacgccgatctattacccatcaggaaagctacacatcggtaactcatatacaacgatcgcttgcgatgttttagcacgctacaaacgtttgcaagattttgatgtcttctttttgacagggacagatgaacacgggttaaagatcgaacaaaaagcccaagacttgaatatgacgcctaaagaatatgttgatatgatggctgaagcgatccaaaaattatggcaggagcttgagatcacaaatgataaatttatccgaacaacggatgaatatcatgaagaagcgatccaaaagatcttccaaaaacttttggataagggtgatatctatcttggctcttacaagggttggtattctgtttcagatgag…	MADKQTYYITTPIYYPSGKLHIGNSYTTIACDVLARYKRLQDFDVFFLTGTDEHGLKIEQKAQDLNMTPKEYVDMMAEAIQKLWQELEITNDKFIRTTDEYHEEAIQKIFQKLLDKGDIYLGSYKGWYSVSDEEYFTESQLAEVYRDEQGNMIGGKAPSGHEVQLVEEESYFFKMGKYADRLVEYYNEHPDFIIPQSRKNEMLNNFIKPGLEDLAITRTSFDWGVKVPNDPKHVVYVWIDALCNYITALGYGSKDQELFNKYWPADVHMVGKEIVRFHTIYWPIILMALDLPLPKHIIGHGWLVMRDGKMSKSKGNVVYPEMLTKRYGLDALRYYLMRAVPFGNDGIFTPEDFVQKINYDLANDLGNLLNRTVAMINKYRGGVIPTLTSNVTAFDLDLE…	Methionyl-tRNA synthetase
NODE_14_length_27173_cov_97.354606	fig|1578.617.peg.357	20273	19776	-	Low temperature requirement C protein		atgtatcaaaaaaactttaaatatcctgatactaaggcacatgaatttgtgatcgcacgcttagctaaacgcggtgtcagtttagatgaattggctaagttggtctatgagacccaaaaggactttgaattaggcttgactttagaagaatgcaaaaaagatgtcaatgatgtgatgcacaaacgagaattattgaataatgcgatggtcatgttagagctcgatcgtttgacagaagaaggaaaagtggcttcaccattagccgagatcatcgaaaatgattcgggagtttttggggtcgatgaaactttagcattacagatcgccaatatctatggtacgatcggagctaccaattttgggtattttgaccgcgtaaaatctgggatcatcaagaaa…	MYQKNFKYPDTKAHEFVIARLAKRGVSLDELAKLVYETQKDFELGLTLEECKKDVNDVMHKRELLNNAMVMLELDRLTEEGKVASPLAEIIENDSGVFGVDETLALQIANIYGTIGATNFGYFDRVKSGIIKKFDTSPEHVNTFIDDLLAAIVAATCGKIAHKYA	Low temperature requirement C protein
NODE_14_length_27173_cov_97.354606	fig|1578.617.peg.358	21248	20292	-	hypothetical protein		atgaacaaaaatgatttgacaactaaaacacaagaattgatcgcccaagttgaggagaaattccccgctggagtcgagatcgaatttaaagaaccaaaaaaagtgggctatttacgccatgatcaagcccaacactatttacatgggggcaaattaaaagttgatgtttatgatcagaccgatccagattatacagtcgcgcatgaattgttgcactttttattgatgctagacaagacaccacaagtagcatttaatttgacgactggcgatacgaataaagatcataaatttatgctagcagggatcgacctatatgatacggtcttacacactaaagtctatgctaaacagcgaaaattaggttttgtagatgataggatcgaaaagttatatcta…	MNKNDLTTKTQELIAQVEEKFPAGVEIEFKEPKKVGYLRHDQAQHYLHGGKLKVDVYDQTDPDYTVAHELLHFLLMLDKTPQVAFNLTTGDTNKDHKFMLAGIDLYDTVLHTKVYAKQRKLGFVDDRIEKLYLKGVLAILKPEPKGKRDEWMVLRTVTLLDVLVFFADDLAQVLPELEKNYPLSLAAAQKLYAVMTEKSLKTAFEVRRGVVRLWKSFDKQLSEWNLLPMHLNDFITITPVLSERQLRLETSALFEFYHTPWQENLTFKSAYVGRFKVDGQNSFILPDLGEKPAEKFKELYAMPVTKLLATLGVEYLLR	hypothetical protein
NODE_14_length_27173_cov_97.354606	fig|1578.617.peg.359	22509	21235	-	Hydroxymethylglutaryl-CoA reductase (EC 1.1.1.34)	1.1.1.34	atgaacggatttagcaaatactatcaaaaagatcgccagacacggctagatattttagtacaacaaaaaaaattgacgcaagctgaagtagactctttgatagatcccaagcttgatcttacactgggagatacgatgatcgaaaactttatcacgcagtatcagatcccggaaggtttagcgttgaattatgtcattgatggaaaagaatatttgatcccaatggtgactgaagagccatcggtgatcgcagctgccagtcatggagctgcgatcgtcaagcgaagcggaggttttacaagtgaactaaaagaacgcttgatgatcgggcagatcgtcatcgaacaggtcaaagacgccactaaattggcccaagaacttgaacaaaagcaagctaaa…	MNGFSKYYQKDRQTRLDILVQQKKLTQAEVDSLIDPKLDLTLGDTMIENFITQYQIPEGLALNYVIDGKEYLIPMVTEEPSVIAAASHGAAIVKRSGGFTSELKERLMIGQIVIEQVKDATKLAQELEQKQAKLLQLANEAHPSIVCRGGGAREIKVRILAPDLISLDLIVDVKEAMGANMLNTMLEACASYLRTELNTEILLSILSNYATRCLVKVTCEIPVSELTKGELAGEKIAQKIATASRLAQLDPYRATTHNKGIMNGIDAVVIASGNDWRAIEAGAHAYATRNGSYQGLSTWQVKGDKLIGELELPLPLGSVGGSVSIVPLVKLNHRLLELQDAKELEKIVAAVGLGQNLAALYALVTDGIQKGHMKLQLKSLAVAVGASPSEVSAVVAGLL…	Hydroxymethylglutaryl-CoA reductase
NODE_14_length_27173_cov_97.354606	fig|1578.617.peg.360	27172	22634	-	hypothetical protein		gaaagcaaagttgagtcagtgggctatgagacccagtatgtagcagatccagagttacttgaaggaacgacaagcgtacgaacgcaaggtcaagcaggcgagcgcacgatcgtgtatgaagtgacacgtgatgccactggaaaagaaataagtcgcgtagaaaagagtaacgccataaccaaagcaccagtaacagaggtgatcgcacaagggaccaagccaaaaaccacagtgacagaagaagttttagtagagaagatcccatatacaagtgagatccaaagtgatcccgaactttttgttgggacaacagtcgttaaaacagcgggtcaagcaggtgagcgcacgatcgtgtatgaggtgacgcgcgatactaatggaaaagagctcgcacgtgta…	ESKVESVGYETQYVADPELLEGTTSVRTQGQAGERTIVYEVTRDATGKEISRVEKSNAITKAPVTEVIAQGTKPKTTVTEEVLVEKIPYTSEIQSDPELFVGTTVVKTAGQAGERTIVYEVTRDTNGKELARVEKSDEITKVPVNEVVAKGTKLYAKPLVELASTDESVDNRVATVSYTVTDPNKKLQAIKVSLYKENEKITEKLVDLTTLTTTFADLAYNTNYRLETEYTYDIGQGDQTENLKPITVELTPKKVELKNVDNISLYQLGKNGGLELVSSLAELPTDPNKYVAKIVSRQQKDWYLPVTSFEEIKLGEKTKYQATIATPELVTYQADKRDFSTGHTFLIDQTEISNEYTNFAELIKAIKADPTGDFILAADLDALGFASSDADYITETFSG…	hypothetical protein
NODE_150_length_2379_cov_82.158568	fig|1578.617.peg.361	939	1	-	hypothetical protein		atgcgtttaaaacgcgattttagcttacattggaaaaattatctgatcctctttttagtggtcgaactttcacttgaggtcgcggttatccccctctttaatgcgtggacttcgttactattgaatttaggtgcgatcccctatttatcttataccaatgcactttcactcgttacgagccatccctatatcaccttgggcttacttttggaattgatcattttgatcatctgtgtttttggacaatttgcactcatcctaaatggtgttgttttgatcaggcaagatgaattcagctttcgtgcgatcttaaaaaacacggctcggcaattacgccagcttgatccactcgggatcttcttttttgccggctatttcttattgatcgtgccttttagt…	MRLKRDFSLHWKNYLILFLVVELSLEVAVIPLFNAWTSLLLNLGAIPYLSYTNALSLVTSHPYITLGLLLELIILIICVFGQFALILNGVVLIRQDEFSFRAILKNTARQLRQLDPLGIFFFAGYFLLIVPFSGIFFSSPLLSKVVIPEFILDFLLQKPLYATLISIFYLAIFILSIRLLFVLPLMLFEKVKIKTALAQSWQLTKNKFWSYTLKLLKISLIALITNLGLTGILYSIQLGLDQTSPLSALIGGSINVTLLQIGSFLISVWASVALLQLILPTNVPLATYKSTKKSWLSKIAKPLFALFTLGTLL	hypothetical protein
NODE_150_length_2379_cov_82.158568	fig|1578.617.peg.362	1104	1547	+	MaoC-like dehydratase		atgcctgatgatgtgcatcggcagggcaaaacgatcgctgagatcaaagaaggcgattcattgactgtaacggaaagtatctcagaacgagatctattgatctatttgggactgactaacgataataacccactgtatattcaaaatgaatatgcacaaaaattagggcacgctggtccagttgtaccgccagtattgttgagtgggatcattacgagctcagtttcaaaattattacctggacctgggagtgaagtggtgaatttttcagctaacttcattcggccagtctatcatgatgagatcgtcacattcagttttgaagtgatcaaagttgatacgatgaaagaagttgtgatgatctcagttgagggtagtaaccgtcaaaatgaacgtgtt…	MPDDVHRQGKTIAEIKEGDSLTVTESISERDLLIYLGLTNDNNPLYIQNEYAQKLGHAGPVVPPVLLSGIITSSVSKLLPGPGSEVVNFSANFIRPVYHDEIVTFSFEVIKVDTMKEVVMISVEGSNRQNERVLDSVVMARPPRQQD	MaoC-like dehydratase
NODE_150_length_2379_cov_82.158568	fig|1578.617.peg.363	1591	2292	+	FIG005935: membrane protein		atgaataataatcccgaagtttacaacaatagtaatgccggcttgaacagtttctttactaagatgtatgggtatatgagtgctgcagtagcagtttcggcgctaacggctttctttggttcgtttagcccaactgtgatccggtttatgagtaatccgatcgccttatttgcagtctttggggtccaattagttttggcttactccatgtcgtcgcttaagtcacaacgttcacctttagtgagtgctttaggtttgttcgtctttgcagggttggaaggtctactctttagtgggatctttatcgtctacactgctcaaaacattaccagtgcttttgtttccgcctttgtgatgtttgctgttttgtcctttatgggctcaacaactaaaaaagat…	MNNNPEVYNNSNAGLNSFFTKMYGYMSAAVAVSALTAFFGSFSPTVIRFMSNPIALFAVFGVQLVLAYSMSSLKSQRSPLVSALGLFVFAGLEGLLFSGIFIVYTAQNITSAFVSAFVMFAVLSFMGSTTKKDLSGIGRQARAALIAFIIVSLINLFLQSPMITYVFSFIGLVIFAGLTAWDTQRLRQMYLQMGSQVNVNNLALMGALQLYLDFINIFIFLLNIFTGAGGNRD	FIG005935: membrane protein
NODE_151_length_2286_cov_96.287173	fig|1578.617.peg.364	32	931	+	Sucrose phosphorylase (EC 2.4.1.7)	2.4.1.7	ttgataaaacatggggcaacgatcattcgtttagatgcatttgcctatgctataaaaaaacttgacacaaatgatttctttgtcgagcctgagatctgggaattattagatgaagttcaagcgatcgtagctaaaaaaggtgcggtgatcttaccagagatccatgaacactatacgatccaacgaaaattgacgcaacatgactactttacgtatgattttgctttaccaatggtcgtgttatatacgctttatagtcaagatgcgactcggctagttgaatggttgagcgatagtccaatgaagcaatttacgacgcttgatactcacgatgggatcggtgttgtcgatgtcaaagatattttgacagatgaagagatcgagcttacgactaataaa…	MIKHGATIIRLDAFAYAIKKLDTNDFFVEPEIWELLDEVQAIVAKKGAVILPEIHEHYTIQRKLTQHDYFTYDFALPMVVLYTLYSQDATRLVEWLSDSPMKQFTTLDTHDGIGVVDVKDILTDEEIELTTNKLYEIGANVKRKYSTAEYNNLDIYQINTTYYSALGDDDKKYFISRLIQAFAPGIPQVYYVGLLAGKNDIELLEKTKEGRNINRHYYSNEEIAREVKRPVVVALLKLFTYRNRSKAFELDGKFEITTSAKNSFNIKRTSADGQTVSELKVDLATYSYEVKENGQKITF	Sucrose phosphorylase
NODE_151_length_2286_cov_96.287173	fig|1578.617.peg.365	1206	2222	+	Tryptophanyl-tRNA synthetase (EC 6.1.1.2)	6.1.1.2	atggcaaaagatattattttgacgggggatcgtcccacaggtaaattgcatatcggacattatatcggttcactaaaaaatcgggtcgagatgcaaaatacgggtaaatatgacacctttatcatgatcgctgatcaacaagcattgacggataatgctcgcgatccagaaaagatcaaaaattcattgatcgaagtcgccttggattatttggcagtaggtatcgatcctactaaatcaacgatctttgtgcaatcacagatccctgctttagcagaattaaacctatattatttgaatttagttactgtttcacgtttagaacgcaatccgactgttaaaacagagatcgcccaaaagaactttgaacgttcgatcccagctggctttttcacttat…	MAKDIILTGDRPTGKLHIGHYIGSLKNRVEMQNTGKYDTFIMIADQQALTDNARDPEKIKNSLIEVALDYLAVGIDPTKSTIFVQSQIPALAELNLYYLNLVTVSRLERNPTVKTEIAQKNFERSIPAGFFTYPVSQAADITAFKANLVPVGDDQEPMLEQTREIVRSFNSIYGKEVLVEPQGVFPPKGSGRLPGLDGNAKMSKSLGNAIYLADDADTLRKKVMSMYTDPNHIHIEDPGQIEGNMVFTYLDIFDSDKQKVAELKEHYQAGGLGDVKIKRYLNEVLEAQLGPIRKRREEFAQDIPSVYAMLKEGSQKANAVAEQTLAEVRAAIGVNYFD	Tryptophanyl-tRNA synthetase
NODE_152_length_2194_cov_83.745025	fig|1578.617.peg.366	858	1	-	Type I restriction-modification system, specificity subunit S		atgatcgatacaaaagtgcttagagaaaagatcttagatttggcgatgcgggggaaattagttccacaagatccaaatgatgagccagcaagcgaacttctaaagcggatcaaagcagaaaaagaagaactcattaaacaaaagaaaatcaagcgtgataagaacgaaaccgagatttttaaaggtgatgatggtttacattatgagaagtttgctgatgggactgtgaagaaattagatgttccatatgaactacctgatggatgggaatgggcaaaattaggctcttatatggatgtaagagatgggacacatgacacaccaaaatatttcgattctggaattccgtttgtcacgagtaagaatctaggtgatggaaaaatagacttcaagaatgtt…	MIDTKVLREKILDLAMRGKLVPQDPNDEPASELLKRIKAEKEELIKQKKIKRDKNETEIFKGDDGLHYEKFADGTVKKLDVPYELPDGWEWAKLGSYMDVRDGTHDTPKYFDSGIPFVTSKNLGDGKIDFKNVNYISDEDSQKFNQRSRVEAGDILMAMIGTIGKPVVAPKVEFEYSIKNVALFKRLTIEQNSKFIRDYLQYSEKRLRKCASGGNQKFLSLKKLKEILIPIPPSSEQKQIVSVLSDYLSLVECIDSDQNALQQLASQLKQKVLDIAMQGKLVPQDP	Type I restriction-modification system, specificity subunit S
NODE_152_length_2194_cov_83.745025	fig|1578.617.peg.367	2192	855	-	Type I restriction-modification system, DNA-methyltransferase subunit M (EC 2.1.1.72)	2.1.1.72	ttttacacaattatatggactttatcagaaactgagtccgtcattccaaaagattatcgttgggataatttagtttcaaaagaaggattagagctgaagaaattctataaaaaacttttgcaagatctaggagatcctgatgttgctaaagataagcgtctcaatatgatctatgctgatgcttcaacgagtattgatgaacctaaaaatctagagaagatcatcaaggatatcgatactttagattggtattctgctaaacatgaagggttaggtgatctgtatgaaggattgcttgaaaaaaatgcgaatgaaaccaaatcaggtgctggtcaatactttaccccacgagtgttgatcgatgtgatggtccaactaatggatcctaagaaaggtgaa…	FYTIIWTLSETESVIPKDYRWDNLVSKEGLELKKFYKKLLQDLGDPDVAKDKRLNMIYADASTSIDEPKNLEKIIKDIDTLDWYSAKHEGLGDLYEGLLEKNANETKSGAGQYFTPRVLIDVMVQLMDPKKGERLNDPAAGTFGFMIAADHYLKEKYDDFFDLSPEEVEFQKKEALSGMELVPNTHKLALMNALLHDIEGRLDQGDSLSANGKWMKDFDLVLTNPPFGTKKGGERATRDDLTYETSNKQLNFLQTIYNSLKTDGKARAAVVVPDNVLFDSGVGESIRKDLMDKCNLHTILRLPTGIFYAQGVQTNVLFFTRGTTEKDNTKDIWFFDMRNNMRKFGKRNPLNVKDFAEFIECYKRDDMENRKETWSEDTPNGRWRKYTIEQIKARDNTSL…	Type I restriction-modification system, DNA-methyltransferase subunit M
NODE_153_length_2118_cov_108.494005	fig|1578.617.peg.368	1589	120	-	Di-tripeptide/cation symporter DtpT		atgacagataaaacacaggagcccacttttttagggcatccacggggtttatcaacgctctttttcacagaaatgtgggaaagatttagttactatggtatgcgtgccatcttactttactatatgtattattccgtctcacaaggcggtcttggttttgataagacgacagcagcttcaattatgtcgatctatggttcgcttgtttatttatcaagtgtgatcggtggttttgtcagtgaccgtatctggggaagtcggaaaacagtctttatcggtggggtcttgatcatgttagggcatatcgttttagcgactccatttggcaaaatggcgctcttcttatcgatcgctttgatcgtgatcgggacagggctacttaaaccaaatgtttctgaa…	MTDKTQEPTFLGHPRGLSTLFFTEMWERFSYYGMRAILLYYMYYSVSQGGLGFDKTTAASIMSIYGSLVYLSSVIGGFVSDRIWGSRKTVFIGGVLIMLGHIVLATPFGKMALFLSIALIVIGTGLLKPNVSEMVGGLYTPEDTRRDSGFSIFVFGINMGAFIAPLTVGWLGQQVNFHLGFSLAAIGMFFGLIQYSIDGRKYLSKESLYPTDPLEPDEMKSLGRKTAVWSVLIALIIVLMLLFNMFTIMNIINLLTIFAVCIPVYYFVKILASNKIDKVERSRVLAYIPLFIASVLFWSIEEQGSVVLALFANEQTRLSLFGFNFPSSWFQSMNPLFIMLYVPFFAKLWTKLGKKQPSSPMKFSFGLFFAGLSFIWMMLPGLLFGTDTKVSPLWLIMSW…	Di-tripeptide/cation symporter DtpT
NODE_153_length_2118_cov_108.494005	fig|1578.617.rna.1	2075	2003	-	tRNA-Thr-CGT		gccggtttagctcagttggtagagcatcggtatcgtaaaccgagggtcacaggttcgaatcctgcaaccggca		tRNA-Thr-CGT
NODE_154_length_2103_cov_92.694686	fig|1578.617.peg.369	311	844	+	hypothetical protein		atgttagatactagtttattattcttgctgaaatatacaaagaaaaggacagtattggtcgattttgaaggccaagtatatacggataactatgccagctttgatgaagtttatacggcatcgggggatgatatcgagcgcttgaaattattgttggctgagtatgtgaagctagctgggagtaaggctgtgggagaacaaatatttatgtatattcctaatttgcgcctgttctttgaaaaaagtggtttgacgatcgataactttatcttgactttaaagcaagcttggcgagcaggtttatatattatcatttctgatagtatcaactacattgaaaaaggctttgatttaaatgttcaagaactgcgcaaaaatattacagccggagttgtcaca…	MLDTSLLFLLKYTKKRTVLVDFEGQVYTDNYASFDEVYTASGDDIERLKLLLAEYVKLAGSKAVGEQIFMYIPNLRLFFEKSGLTIDNFILTLKQAWRAGLYIIISDSINYIEKGFDLNVQELRKNITAGVVTARLNDTDTIKVMGSSLEKNLAGNEAYYFESQGTKYAKVRLAGKI	hypothetical protein
NODE_154_length_2103_cov_92.694686	fig|1578.617.peg.370	864	1244	+	hypothetical protein		atggaaaaagtagattttttacccttagggacagtagttgttttaaatggttcgatcaaaaaggtcatgatcgcgcagcgtgcggtttatgtacctgtaaatgaggacgaaacagatatcaaatatttcgaatatggtgcagtcttatatcctgaaggtttagtggatgggcaattagtatattttaatagcgaagatgtttataaagtaattgctgtaggctatacagatgctgatgatgaactcttggttgaggagatcaatgaggcattagaaaaagtggaaaacgagcctaaaaaagtcactgagattgcagaaaattcttcaagtacagtcgatcctttcagtggtttgtctgagaaatttgataaaggagaataa	MEKVDFLPLGTVVVLNGSIKKVMIAQRAVYVPVNEDETDIKYFEYGAVLYPEGLVDGQLVYFNSEDVYKVIAVGYTDADDELLVEEINEALEKVENEPKKVTEIAENSSSTVDPFSGLSEKFDKGE	hypothetical protein
NODE_154_length_2103_cov_92.694686	fig|1578.617.peg.371	1249	1593	+	hypothetical protein		atgagtccagaagagatcgctgagcggcttgttaagattgctcagcataacgaagcggtccatcggcataatgcaaagatcgatcgaaaaattgaaagattaaagcaagcgatacaagagttgacctcactgcaagtggagctagagagtttacggaccaataagctagaacatggtggtgaaaatgtttggaagggcgatgtttatcgcgagcataaacgaaaagttggccatatggaagatgatgttaagcgactctcttctttgataggggatacttttgaagattatagtaacaagatccgacgtttacgagcagagaagcaaagttattggtttttctag	MSPEEIAERLVKIAQHNEAVHRHNAKIDRKIERLKQAIQELTSLQVELESLRTNKLEHGGENVWKGDVYREHKRKVGHMEDDVKRLSSLIGDTFEDYSNKIRRLRAEKQSYWFF	hypothetical protein
NODE_154_length_2103_cov_92.694686	fig|1578.617.peg.372	1607	1876	+	hypothetical protein		atggcaaagatcagtgtaaatacaggagaggtcaagcgaaatgtacgacagatcagtactgctggcaatgctttggcgggtaaacaagatggtttgcgacaaccaaatagtagcattaacacgccaacgcctaaaaagatccgagaaaaatatactcagatcaataatttattgcatagatatggagctttggttaaaaatgatgccaagcggatcgaaaaagtagctcaaaatatgcgtgaactagacgaaaaaatgggacggaggtga	MAKISVNTGEVKRNVRQISTAGNALAGKQDGLRQPNSSINTPTPKKIREKYTQINNLLHRYGALVKNDAKRIEKVAQNMRELDEKMGRR	hypothetical protein
NODE_154_length_2103_cov_92.694686	fig|1578.617.peg.373	1882	2103	+	hypothetical protein		atgactaagatgaattacatggagttatatggattcatgctggcaacaaaccaaggcttaaatagtcggcgtgatctattacgtaaaacgcaaaagagcctaaatgtttttgcaagtggtaaaggcgggctcactggtggtgccgctgatgggatcgcaaattatatcagtgaagtgcatgctagtgggctacagacaatgatcgaacagttgctacaacgt	MTKMNYMELYGFMLATNQGLNSRRDLLRKTQKSLNVFASGKGGLTGGAADGIANYISEVHASGLQTMIEQLLQR	hypothetical protein
NODE_155_length_2003_cov_108.258376	fig|1578.617.peg.374	577	110	-	hypothetical protein		atggatgaatttaaaaaagtaaaagaaaaatttgttacaagtatttggtttgaaatcgcaacttttgttgggatgtttattgtagaaggggtattgcgatatacacatagcgcgagcgagatgagattaggctcagcttcctcccaaggttatggttggggactcatcatgggtggctggaccttatatctcccgatgatagcagttattgtaacatggtgtgttgtatatattacagctatcaaagttaaggtcgattatttatcagctattcctacagtctcacactctgcagcaatgtatattattttaagagtcgggtcgcttgtgctttatatcatgccattcttttttctgtttgggatggtcaaaagtacggtatttacagtagggggcatc…	MDEFKKVKEKFVTSIWFEIATFVGMFIVEGVLRYTHSASEMRLGSASSQGYGWGLIMGGWTLYLPMIAVIVTWCVVYITAIKVKVDYLSAIPTVSHSAAMYIILRVGSLVLYIMPFFFLFGMVKSTVFTVGGILGICEVLLQYVSYANLFKDLDE	hypothetical protein
NODE_155_length_2003_cov_108.258376	fig|1578.617.peg.375	1712	642	-	hypothetical protein		atgttttttgtactattgattttttggatatttttccccgtgtggatcgggggtattcagtggataatagcgactattagtggtttgatcgccaaaaatactggtattttagaaaatttagcaacttttaaagatgcgatcaagacgaataaagtgaaacaaattgtggctttattaggtagtgttctttgtttagggctaggtacacaacaagtagctatgtattttctttcgggagcatatttttggttagttttattttcgtttggtggatatttacttttatttattattccttggttcaatttgatattacttttcaaacaaagagttaccacagtttggtcagcctttttttacttaagtacgggcttacttttagttgcgatcgttgctttg…	MFFVLLIFWIFFPVWIGGIQWIIATISGLIAKNTGILENLATFKDAIKTNKVKQIVALLGSVLCLGLGTQQVAMYFLSGAYFWLVLFSFGGYLLLFIIPWFNLILLFKQRVTTVWSAFFYLSTGLLLVAIVALAKTKNVIYTTESGSYPVPTNGTVKVITIVLLVVYYLFCLSLLIVVESENETKKIKRLSYRGSPILHKSLALFRNAFANEHFKYLKKRNATKLSLILAFLPIIFVFVMFLVVKVFHSKFYMAELTLFCGISPILIGGISLLFLKNTPNILKGLSLVLYTLLGLLNLFWTYYFQGVFIRLATEGYLYDKMTNSINLITAVGTIILTTSAWLMPYLLFLVKRKVAA	hypothetical protein
NODE_156_length_1984_cov_111.431061	fig|1578.617.peg.376	528	1	-	hypothetical protein		atgacagctatatcgtttatcgttccaatgtataattcggcgtcatatttagagaaaaatctcaagagtattgcccaaatggtgggacaaaaaagagcagaagctgaggttttgttggtcgatgatggctcaactgacgaaactagagcgatcgcgtatcgttatgctaaaaaatatagcttcatccaagttattgaagcttttcatcaaggtgtaagtgtggcgcgaaatcttggagttgccaatgctaccggaaagtatctgacttttatcgatagtgatgatgaatttgcccctaattttgtggacgttttcgagactttgatcgtaaaagaaccagacttagtttttgttgaccttgaaacagtggacaaagatacactgttagaaaatatagat…	MTAISFIVPMYNSASYLEKNLKSIAQMVGQKRAEAEVLLVDDGSTDETRAIAYRYAKKYSFIQVIEAFHQGVSVARNLGVANATGKYLTFIDSDDEFAPNFVDVFETLIVKEPDLVFVDLETVDKDTLLENIDAKQKISLFKLINRGRGNTGIGSKFFKRSFLEQYNLNCQIKLEK	hypothetical protein
NODE_156_length_1984_cov_111.431061	fig|1578.617.peg.377	1530	538	-	Glycosyltransferase		atggataaaatagattttgtagttacatgggtaaatggggctgataaaagatggcaggcaaaacgcgctgagtttgataacagatcgctttcaaaagctgggatgagtagtgacaaagcttaccgcgattggggaacttttaagtattggtttcggggagtagagaaatttgcaccctggatcaataaagtttatttggtcacagatgatcaaattccaacttggttaaacatagatcatgaaaaattagtcgtcattgatcatactgatatcattgcaaaagagtatttaccagtttttaatagtaatgcgatcgagatgaatttgcatcggatcaaaggcttagctgagaattttgtgtactttaatgatgacatgtatttgacagctccagtagca…	MDKIDFVVTWVNGADKRWQAKRAEFDNRSLSKAGMSSDKAYRDWGTFKYWFRGVEKFAPWINKVYLVTDDQIPTWLNIDHEKLVVIDHTDIIAKEYLPVFNSNAIEMNLHRIKGLAENFVYFNDDMYLTAPVAPTDFFQAGLPVDMAVLSPIVAEENGTANFQVNDMEIINKYFTRNEIIKNGRILSLKYGKNLIRSLLQLPSKFICGYYEPHLPLKFKRSTFEKVWEKESQILTETTATRFRDKSNVNLWLFRYWQLATGEFVPKNTDKLGNLYSLSNDNSQIFSDLVTSKHKIMCINDGFEIAELEKQMVLLQDSFAKLFPKKSTFEK	Glycosyltransferase
NODE_156_length_1984_cov_111.431061	fig|1578.617.peg.378	1971	1627	-	Undecaprenyl-phosphate galactosephosphotransferase (EC 2.7.8.6)	2.7.8.6	ttgacgggacatagtgccataacttctgtaggacgctttttacgtaagacaagtttggatgagctacctcagttgtggaatgttttgcgtggagatatgagtttagttggtccaaggccaccgttgccaagagaagttgctaattatagtaaatacgatttgcaaaggttatgggtcattccagggattacggggttgtggcaagcaacagagcgtaataacgttgggtttgaagaaatggttgagctagatttagaatatattaaaaagcgtagcttgctgtttgatgtgaagatcattttgttgacgatcgtagcgatcatccatcctaatggagcttattaa	MTGHSAITSVGRFLRKTSLDELPQLWNVLRGDMSLVGPRPPLPREVANYSKYDLQRLWVIPGITGLWQATERNNVGFEEMVELDLEYIKKRSLLFDVKIILLTIVAIIHPNGAY	Undecaprenyl-phosphate galactosephosphotransferase
NODE_157_length_1911_cov_101.385517	fig|1578.617.peg.379	3	251	+	Pyrimidine 5'-nucleotidase YjjG (EC 3.1.3.5)	3.1.3.5	tcctttgtccaacttagggggttcacttcatcgcagctcttttttaaacgtgcttttgagcaaatagctgggtttgataaagctaaaactttgatcattggtgactctttgagctcagatatgttaggcggacaaaatgctgggatcgatacgctatggttgaatcgtaagcaccaggtggctgaccctaagatcaagatcgatctggaagctagttcgcttgagcagatcagtgatcttttaagctaa	SFVQLRGFTSSQLFFKRAFEQIAGFDKAKTLIIGDSLSSDMLGGQNAGIDTLWLNRKHQVADPKIKIDLEASSLEQISDLLS	Pyrimidine 5'-nucleotidase YjjG
NODE_157_length_1911_cov_101.385517	fig|1578.617.peg.380	286	843	+	hypothetical protein		atgctttggaaaaagaagcaagaggggaaaaatcatgattgcatagtagaactataccattgtaattatgaaagccgtgtggaaagtttttttaagcataaagagttacggatcagccaccataaagatgacagtgagtggggcggaacagggatgtatttttgggataacgaaggtaatgcagaatattggaaaaaacaaaaagatggtaaggcagatatttttcgttgttatgttaagtttgatgctagaaatgatttactcgatctgactgatttaaatgttgaaaagagattagatcaatttatacggcttgctagtaaagaaccaaaactacaatatttaaagaaagcttctattggggataaaattgatttcttttgtgaaaaatgtaatgtt…	MLWKKKQEGKNHDCIVELYHCNYESRVESFFKHKELRISHHKDDSEWGGTGMYFWDNEGNAEYWKKQKDGKADIFRCYVKFDARNDLLDLTDLNVEKRLDQFIRLASKEPKLQYLKKASIGDKIDFFCEKCNVKLVKFFGKYPKTSQTELLDSENRVQKLTNQVKVIYCVKEGNGGIFTGNIEKS	hypothetical protein
NODE_157_length_1911_cov_101.385517	fig|1578.617.peg.381	849	1124	+	hypothetical protein		atgtcattgcttaacagaatggataagctgatcgaaggattagagtcaggagatactaagttcctagaatccttagatgctgaattttatgaatatgctcagcaacaaaaagaaaaacggaataaacagataaaaactagtattttattagatacggtcgtttctgcaacatctaattcacttaaaaaggaaaaaggtgttcaacaggggatcaaaaaatatactacaattaaagtagatcttgataatttaacctatgaagtagatgtggcttaa	MSLLNRMDKLIEGLESGDTKFLESLDAEFYEYAQQQKEKRNKQIKTSILLDTVVSATSNSLKKEKGVQQGIKKYTTIKVDLDNLTYEVDVA	hypothetical protein
NODE_157_length_1911_cov_101.385517	fig|1578.617.peg.382	1136	1525	+	hypothetical protein		atgaaaccagcgatagaattagaaagatatgaaattgaagagttatcttatgttagaagtgtagataatgaagacttaggatcggataatttaaagttggcaatagaatcgggaatgactgaggataggaaaaacggcaaggtcacattaaaggcaaaatttgttgatcaaggcgaaaataagacgatagtggctcgagtgagtgggtacttcacgatcaatttagagagtgagcaagaaaattatttggtagttaatggggctgcaatcgtttttccttatctacgaagtgccatctcaatggtttcatctttagatagttcagatgctgtgttgatccccacggtaaatatactatccttattagaagaacaggcaaaagataagtga	MKPAIELERYEIEELSYVRSVDNEDLGSDNLKLAIESGMTEDRKNGKVTLKAKFVDQGENKTIVARVSGYFTINLESEQENYLVVNGAAIVFPYLRSAISMVSSLDSSDAVLIPTVNILSLLEEQAKDK	hypothetical protein
NODE_157_length_1911_cov_101.385517	fig|1578.617.peg.383	1840	1911	+	DNA-directed RNA polymerase beta subunit (EC 2.7.7.6)	2.7.7.6	ttggcaggacatttagtaaaatacggcaaacaccgtgaacgcagaagttattctcgaatcaaagaagttcta	MAGHLVKYGKHRERRSYSRIKEVL	DNA-directed RNA polymerase beta subunit
NODE_158_length_1860_cov_113.993979	fig|1578.617.peg.384	1312	35	-	Sucrose permease, major facilitator superfamily		atggaattacaacgtaaactacgtgaactcaaaaacccatcatatctgcagagttcgactacgatgctcttattctttgcttcatggggtatttggtggagttttttccaattgtggttaacatctgagcacaatgggctagggctctcaggtagtgctgtcggaacgatcttttcgatcaactcgatcgctagtttagttttgatgtttctttacggaacgatccaagataaattatttatcaaacgacatttattgatctttaatgctattttagcaactttgatcgctccttttttcatctttgtttatgcccctttgcttcaaagtcattttatcgtaggtgcttggatcggagcgatctttttatcggccgcttatctttcggcagtcggtgtc…	MELQRKLRELKNPSYLQSSTTMLLFFASWGIWWSFFQLWLTSEHNGLGLSGSAVGTIFSINSIASLVLMFLYGTIQDKLFIKRHLLIFNAILATLIAPFFIFVYAPLLQSHFIVGAWIGAIFLSAAYLSAVGVLEATTERFSRVFGFAYGQARAWGSFGYAISALLAGFLFVKDPRLNFIGGSLIGICLLLDLLFWRPKEERAALKAIDELKSDDATPKLKDMVGLLKIKVLWQIIFFVMFSWTFYNVFDQQMFPEFYTSLFSSNAVGQQTYGTLNSIQVFVEALMLGLVPLLMKKIGVRKTLLLGTAIMCLRIGLCGFITDPIVISGVKMLHSLEVPLFVLSIFRYFTLHFDTKLSATLYMIGFQIAAQVGQVILSTPLGILRDNMGYSMTFKIIALI…	Sucrose permease, major facilitator superfamily
NODE_158_length_1860_cov_113.993979	fig|1578.617.peg.385	1766	1464	-	hypothetical protein		atggatctgactgcatttagtgctgaacttggttatgtgatcaaccgtaacttttgggggcaaggactcgtccctgaagccgcccgtgctttgttagccttggcttttgatgaacttaacttagcccaagtccatgcggtccatgcaacaaaaaatcctaatagtggtcgagtcttagaaaagatcggaatgcgtccagtagggatctttccaaactacatcacacataatttttcccctactgatgtcaagatctgggtcatcactagagaacagtatttagcaaataagcaccaaaaatag	MDLTAFSAELGYVINRNFWGQGLVPEAARALLALAFDELNLAQVHAVHATKNPNSGRVLEKIGMRPVGIFPNYITHNFSPTDVKIWVITREQYLANKHQK	hypothetical protein
NODE_159_length_1860_cov_75.140120	fig|1578.617.peg.386	103	570	+	hypothetical protein		ttgccagataattttgaagctagtgatcaaaaagtcgattttgatgcaaaatacaatgcattaaaatactttttgggtaatgaagttgaaattcataaaagcagttcaaacctatataccattcttccaaaagaagacactgaattgggtgatcaagttacagaagcaatatatggagatttaactaattgggaagatgtgactcgtaaaattatggttagttcaggtcttgctaaagctactatcgttcttctaaatccagaaaatccaagtttaaaaatttatactgctaaaaatgccgaagaaacttatgatgctgtaacagaagcatttggtgattcagaagaagctgatactgatgaagatagcgatacttctgatgatacaacagatgatcca…	MPDNFEASDQKVDFDAKYNALKYFLGNEVEIHKSSSNLYTILPKEDTELGDQVTEAIYGDLTNWEDVTRKIMVSSGLAKATIVLLNPENPSLKIYTAKNAEETYDAVTEAFGDSEEADTDEDSDTSDDTTDDPSEETTSDEETSEEADIDEEVTE	hypothetical protein
NODE_159_length_1860_cov_75.140120	fig|1578.617.peg.387	645	1781	+	Phage integrase		atgtggatggaagaaagaaacggtcgatatcgttttgtagaacaatatatcgatccttacactgagaaaagaaagcgagtttcagtaacgttaaattcgaagtctaaccaagctaaaaaacaagctaaaacattattagaccaaaaaataagaacaaagatcaattcaggtgctacagatgatttaataactggggtaacgatgcaaacgttgatcaatgagtggcttggtatctataaaaaacaagttaaaaatgctacttatgttcctacagtaagcatcatggataaaattttgaacgaactagatcctgatacactcgtttcaaaagttacccctgcatttttgacgaagattttagaaagttttttatatgatgatacacaaaatctatctaac…	MWMEERNGRYRFVEQYIDPYTEKRKRVSVTLNSKSNQAKKQAKTLLDQKIRTKINSGATDDLITGVTMQTLINEWLGIYKKQVKNATYVPTVSIMDKILNELDPDTLVSKVTPAFLTKILESFLYDDTQNLSNKYVRIIKAKLSVLFHYAVTRKYISSNPVDMVKVNWKRNNKTTKIKDKFLEDDELHQLLDYAYTKNFRYATLIEWLYLTGMRIGEALALNWDDITSAEDIYTVKVTGTLEYKNIAISEQYKSDQTKTAAGMREITLPSAGISLYKKLKELNYDSGDFIFQTSTGSVIQISSLNSFLRTAKNELGIDKPVSSHIFRHTHISKLAELGVPLYVIQNRVGHESSKITQTIYLHVTEQAKKQLNSKLDEL	Phage integrase
NODE_15_length_26594_cov_105.297956	fig|1578.617.peg.388	1677	187	-	Glutamyl-tRNA synthetase (EC 6.1.1.17) @ Glutamyl-tRNA(Gln) synthetase (EC 6.1.1.24)	6.1.1.17	ttggcaaaagataagattcgcgttcgttatgcaccaagtccaacggggcatttgcatatcggtaatgcacgaaccgcgttatttaactatttatttgcacgtcacaataaagggacattcgttttaagaattgaagatacggatactaaacgtaatattgcagacggcgaaaaaagccagctcgacaaccttaaatggttagggatcgactgggatgaaggtccagataaaccaggtaaatatggtccttaccgtcaatccgaacgtaaagatatctaccaaccattgatccaagaattattggacaagggtctagcgtatgaatcttacatgacagaagaagaattacaagcgcaacgtgaagaacaaaaagctaacggtgaagcaccacgttatatc…	MAKDKIRVRYAPSPTGHLHIGNARTALFNYLFARHNKGTFVLRIEDTDTKRNIADGEKSQLDNLKWLGIDWDEGPDKPGKYGPYRQSERKDIYQPLIQELLDKGLAYESYMTEEELQAQREEQKANGEAPRYIYEYEGMTADQIKASQEEAKAKGLKPVIRIRLPHDKVYEWDDIVKGKVSFNSDTIGGDFVIQKRDGMPTYNFAVVVDDHLMNITHVLRGDDHVANTPKQLAVYAAFGWEAPVFGHMSLIINSETGKKLSKRDESVLQFIEQYRSLGYLPEAMFNFITLLGWSPVGESEIFSQKDFVKMFDPKRLSKSPAAFDGKKLEWINNQYVKSADSDEITDSSLKQLIKAGKIKADPDTLKIQWVRQLVNLYKRQMSYTGQLAEMAEIFFTEPP…	Glutamyl-tRNA synthetase
NODE_15_length_26594_cov_105.297956	fig|1578.617.peg.389	2875	1766	-	Membrane-associated protein containing RNA-binding TRAM domain and ribonuclease PIN-domain, YacL B.subtilis ortholog		atgcgcaaacgaataattcaattgatctttgcgttccttggtatcgggggagggtattcctttttacccggtctgtggaacctattaaacatccaattacaagttttatataatccgatcgtaaatatgtttatcgggttagttttaatgatgctatgctcatttattttagcagaaccacttgaaggtgcgctaaaaaaagtcgaagagacactggctaaacaaaagaccgaagcgatcatttctgagagtattgcaattattgtgtcacttgtgatcgcagtcttgatctcaacgcttttctggcaatcatcactgttctttatcaatacgatcttgccagtgatcgtgatgatcttatttgcctatctcggctggttcgtaggccgaacgcgtttg…	MRKRIIQLIFAFLGIGGGYSFLPGLWNLLNIQLQVLYNPIVNMFIGLVLMMLCSFILAEPLEGALKKVEETLAKQKTEAIISESIAIIVSLVIAVLISTLFWQSSLFFINTILPVIVMILFAYLGWFVGRTRLGDLPKLFSARSKKKEAEENNVLERKVGDNFYKYKLLDTNILIDGRIYDLAKTGFLEGTLVVPNFVLYELQYIADSGDSIKRVRGRRGLDILNKLQNEKIVPVEMYEGDFDDIQEVDSKLIKLAKMLDAVIVTNDYNLNKVSEFQNVKVLNVNALAKSLKPRVIPGERLNVMVIKNGTERQQGVAYLDDGTMIVVEDGRYYMNKTLEVEVTSAIQTDAGRMIFAKPYHSKKKLREKN	Membrane-associated protein containing RNA-binding TRAM domain and ribonuclease PIN-domain, YacL B.subtilis ortholog
NODE_15_length_26594_cov_105.297956	fig|1578.617.peg.390	4264	2894	-	DNA repair protein RadA		atggcaaaagtcaaaactagatatgtatgtcaaaattgtggctatgtatcaccacgttatttggggcggtgtcctaactgtagcgaatggaacactttagttgaagaagttgaacaaaaaagtgcagcggttaaagctaccccacgcgttactttgacaggaacaacgaatgccccacaaaagatcgatacgatcaagatctcacaaacacctagagtcgatacgaaaaatggtgaattgaatcgggtcttaggtgggggcgttgttcctggttcaatggtcttgatcgggggcgatcctgggatcggtaaatcaacgttacttttacaagtttcgggaagtttatcagatcaagggggaaagttgctttacgtttcgggtgaagaaagtgcaaaccag…	MAKVKTRYVCQNCGYVSPRYLGRCPNCSEWNTLVEEVEQKSAAVKATPRVTLTGTTNAPQKIDTIKISQTPRVDTKNGELNRVLGGGVVPGSMVLIGGDPGIGKSTLLLQVSGSLSDQGGKLLYVSGEESANQIKMRAQRLGVSGSEFYLYPETDMGSILQNIEDLKPDYVIIDSVQTMQMPEVTSAVGSVAQIREVTAALMQVAKTNGITIFIVGHVTKGGAIAGPKILEHMVDTVLYFEGDMHRTYRILRAVKNRFGSTNEIGVFEMRDGGLVEVPNPSEIFLEERLSGATGSAVVVSMEGTRPILAEIQALVTPTAFGNAKRTTTGLDHNRVSLIMAVLEKRAGLLLQNQDAYLKAAGGVKLDEPAIDLAIAMSLVSSYRDQQTAPDDCFIGELGL…	DNA repair protein RadA
NODE_15_length_26594_cov_105.297956	fig|1578.617.peg.391	4877	4341	-	Deoxyuridine 5'-triphosphate nucleotidohydrolase (EC 3.6.1.23)	3.6.1.23	atgaaaagaggatttgagatcgtttcaaaatatcaaggtgaggacttgacgttaccagttagagcaacacaaaatgcagcgggctatgatttttgtgccgctaaagattttgtcttgccaagtatttggaagcgtaactttttgcagatcttacatgcattacgtaaacaaaaagagcacacagctaaagagttagtagctgctaataaggtcttaaaaccataccttgtaccgacggggatcaaggcttatatgcaaccggatgagttcttgatgctggctaaccgttctagcaatccgctaaaacacggcttgatcttaccaaatggggtcgggatcgttgatgctgattattatggaaatgataataatgaaggcgagatctttttccaattggtc…	MKRGFEIVSKYQGEDLTLPVRATQNAAGYDFCAAKDFVLPSIWKRNFLQILHALRKQKEHTAKELVAANKVLKPYLVPTGIKAYMQPDEFLMLANRSSNPLKHGLILPNGVGIVDADYYGNDNNEGEIFFQLVNFGLTDKVIKKGERLGQGIFLPYLLADDEATPLAKRTGGFGSSGR	Deoxyuridine 5'-triphosphate nucleotidohydrolase
NODE_15_length_26594_cov_105.297956	fig|1578.617.peg.392	5014	5301	+	Acetyltransferase		atggatttcatctggcaagacgaccagctaatttgtcaaaacgagcagcaagaaatgctcggtaatattggctttaaaatgatcaataatgaccaaacttatgttatcgaacgtacttttgtcgctgaacaagcacgcggccaaggacttgcaaaaaagatgaccgtcttctttttagagcacgcaaaggcgcaaaataagacgatcctgcctctgtgctcttacacgcaaaaatattttgcagccaatcctgaacttgaacacttattattcaagcaaaataaataa	MDFIWQDDQLICQNEQQEMLGNIGFKMINNDQTYVIERTFVAEQARGQGLAKKMTVFFLEHAKAQNKTILPLCSYTQKYFAANPELEHLLFKQNK	Acetyltransferase
NODE_15_length_26594_cov_105.297956	fig|1578.617.peg.393	5326	6012	+	Ribose 5-phosphate isomerase A (EC 5.3.1.6)	5.3.1.6	atgaatcaaaatgaactaaaacgtctggtaggcgaaaaatcagttgaatgggtcaaaaatgggatgatcgtcggcttaggtaccggctcgacagtccgctatatggtcgatgctttgggacgccggatcgctgaagaagatctccaaataactggcgtaactacttcaagtgttacggctaaacaagctgaagcgttaggcattcctttgatctcagtcgatgaggctgatcatatcgatatcgtgatcgacggtgccgatgagatctcaagcgattttcaaggtatcaagggtggtggcgctgctcttttatttgaaaagatcgttgccgtcaactccactaaagttctctggatcgtggatgaaagcaagatggtcgataaattaggcgctttccca…	MNQNELKRLVGEKSVEWVKNGMIVGLGTGSTVRYMVDALGRRIAEEDLQITGVTTSSVTAKQAEALGIPLISVDEADHIDIVIDGADEISSDFQGIKGGGAALLFEKIVAVNSTKVLWIVDESKMVDKLGAFPLPVEVIPYGSQKLFDRFAAKGLNPTFRKQENGSLLLTDSDNYIIDLHLEQIDDPHALAEYLIHQVGVVEHGLFLDMVNDVIVGKQVGPVVLHARN	Ribose 5-phosphate isomerase A
NODE_15_length_26594_cov_105.297956	fig|1578.617.peg.394	6149	7483	+	Aminopeptidase C (EC 3.4.22.40)	3.4.22.40	gtgactaaatcaatcagcactgcacaactcaaaaattttaaaaatttacttgaaaaacgtaatgatcaccgtgttcttgaacggactgtgacccaaaatggtatcttagcttccagctgtgactatcgtgcaaaagtaaacacaacacctgttttctcgatcgatcttgatacaggtaaggtcgctgaccaaaaacgatccgggcgttgctggatgtttgcagccttgaacactttgcgtcacgatctacgcaatcgcttaaatctaccagatgagtttgagttatcacaaaactttacattcttctgggataaactcgaaaaagcaaattatttttatgaaaacatcttaaaaacagctgacttcccaacttctgaccgaaaagtttcatggttgtta…	MTKSISTAQLKNFKNLLEKRNDHRVLERTVTQNGILASSCDYRAKVNTTPVFSIDLDTGKVADQKRSGRCWMFAALNTLRHDLRNRLNLPDEFELSQNFTFFWDKLEKANYFYENILKTADFPTSDRKVSWLLATPQQDGGQWDMIMGLIEKYGVVPKSAMPETHNSSASSEFNSLLNLKLRKDAVLLRELVQNKATKAQIEAKKEKMLAEVYRMAAYSFGEPPATFDFEYRDQANNYHLDRNLTPKEFFDKYLGWETKDYISVINGPTDDKPFNHMYTVDMLGNVVGGREVRHLNVDMDTFKKLAIKQLEAGESVWFGCDVGQASDRKQGIMDTELYHRDQLFDVDLSMSKAERLDYGESLMTHAMVLTGVDLLDGQPTKWKVENSWGDKVGTKGFFV…	Aminopeptidase C
NODE_15_length_26594_cov_105.297956	fig|1578.617.peg.395	8202	7531	-	Phosphoglycerate mutase (EC 5.4.2.11)	5.4.2.11	atgacaaagttagtattgatccggcatggccaaagtttagctaatcaagaaaatgaatatactggctggtcggattcgcctttgaccgctcagggtatcagagaagctaaaatagctggtgaaaaattacgtcaaacagggatcgtgtttgagcacgtacatacatcagttttgcaacgtgcgatcaaaacagccgatatcgtgttagctgagttagggcaagagtatttaccgctcaccaaaacttggcggttaaatgaacgacattatggcgcattgcggggactaaataaagactatacccgtaaactttatggtaaaaagcaagtagctttgtggcgccggtcatttgaagctgtcccacctttgttggaaaaaccacaaagcgatcgccgttat…	MTKLVLIRHGQSLANQENEYTGWSDSPLTAQGIREAKIAGEKLRQTGIVFEHVHTSVLQRAIKTADIVLAELGQEYLPLTKTWRLNERHYGALRGLNKDYTRKLYGKKQVALWRRSFEAVPPLLEKPQSDRRYQKYPKTIVPRAESLKQASARIIPYWVDQVAPKVLQGKAQLIVAHGSTLRALIKYLEAISDTGIDGVEVANAAPIIYELDEKLQIISKTTL	Phosphoglycerate mutase
NODE_15_length_26594_cov_105.297956	fig|1578.617.peg.396	9665	8295	-	Integral membrane protein		atggaacagcagaaaaattttagtaagaaagctactaaaagaaaacgtgcgccattatccaagcatcaccatatgactatccgatgggacgaatttatcggagatgccggcgatgaattggcaattgatgcaagtttaaaggagcgagcagcgatcgttggacggatcgggatcttgatgctcgcctgtggaactggagcttggcgcgttagaaattcaatgaatagtattgcccgagttctaggcttgacctgtacggctgatgttgggttagtctcgatcgaatacacttgtgtcgaacttgatgaaagttacacccaaactttggcattagcgacttcaggggtcaatacaagtaagttgactgatcttgagtggtttgtgcgcgaatttgaacgc…	MEQQKNFSKKATKRKRAPLSKHHHMTIRWDEFIGDAGDELAIDASLKERAAIVGRIGILMLACGTGAWRVRNSMNSIARVLGLTCTADVGLVSIEYTCVELDESYTQTLALATSGVNTSKLTDLEWFVREFERHGRQMTISDIHYLIDQIRAKSGLYKPPVLGLAAALACSAFVFLLGGGLIEMICAFIGAGFGNYVRAKMNQHKITLFAGIFVSVAVACLMYMVSFRGLEALFLVSSRHEAGYIGAMLFVIPGFPFITSGLDIAKLDMRSGLERMAHALTIIIVATMVGWLTAMSINFKPEDFIPLQLTSWQLLALRLPASFCGVFGFSLMFNSSPKLASTAGVIGALANTLRLELVDFTNVPPAAAAFVGALLAGLLASILGRKAGYPRISLTVPAI…	Integral membrane protein
NODE_15_length_26594_cov_105.297956	fig|1578.617.peg.397	9894	11021	+	Cell envelope-associated transcriptional attenuator LytR-CpsA-Psr, subfamily F2		atgaataatgaaaatgaaccgcgatcaagaaaaagttcgccctcgcatgtcaaaaagcgtgaccccaaattacgcaaacgcatctgttggactttactggcactcaccttgatcgttttttggggagttggaacgtacatacatcacattctaaattcagctaaagatacgttagacaagacctacaacggttcaaatataactaagagtcgcaacgtttcctccgtcctaaaagataagcgtccgatctcgatcttactgcttgggaccgatacaggtgatctagggcgcgatgatactgggcgaaccgatacgatcattgtcgccactttaaatccagaaactaagacaactacgctaacaagtatcccacgcgatactaaagtcaaagtcccagac…	MNNENEPRSRKSSPSHVKKRDPKLRKRICWTLLALTLIVFWGVGTYIHHILNSAKDTLDKTYNGSNITKSRNVSSVLKDKRPISILLLGTDTGDLGRDDTGRTDTIIVATLNPETKTTTLTSIPRDTKVKVPDSVNSYDKVNSAYTIGGVSTAIETIQDTLDIPIDYYVLVNMRGLTQIVDAVGGITIKPLLTFKYEDADVTKDKTVTMNGKQALSYSRMRYDDPEGDYGRQKRQKQVIEAIVNKSLSVSAVSNYQKLLKSIGSNMQTDLTYGDMITIATSYTDAGQTIESNVLQGQDTLLDGLSYQVASAFEKKKVSDAIRKQLGLDASTKSFDDDSSLTDPTGGSTYQTTDDKTNTYTPDYDGTSDHTGNYAY	Cell envelope-associated transcriptional attenuator LytR-CpsA-Psr, subfamily F2
NODE_15_length_26594_cov_105.297956	fig|1578.617.peg.398	12707	11484	-	Secreted antigen GbpB/SagA/PcsB, putative peptidoglycan hydrolase		atgtttttaaagaaagtgatcacaagtacagtcgcacttagtatgttggctgtatctgttttaaatacaacaacagcagtgagtgcagacgctgtatctgatactcaaaatgcgatcaatactaataaaagtgaaacagataaattattaaaagatatcgcctcagcaaacgctgataacattaaattacaagaacaaatttctgataacactgaaaagatcgaaaaattgaagactgatatcgaccaatcaaatgaaaaaatcgacaagttaaatgggcagatcgaaggtgctaaggtcgaagttgaaaaacgcaccgaagcacttaaggggcaattagttgctctacaaaagaaatctggtgatacagttagtggtaacatctaccttgatttcgtg…	MFLKKVITSTVALSMLAVSVLNTTTAVSADAVSDTQNAINTNKSETDKLLKDIASANADNIKLQEQISDNTEKIEKLKTDIDQSNEKIDKLNGQIEGAKVEVEKRTEALKGQLVALQKKSGDTVSGNIYLDFVINSENFSDLVSRTFAVNKLNQANKEALNDVKEAKDQYTSLLNEQEKTKANLQSDKSELETKQNDLKSMKEKSDQQQADLNKKIEDNKATLVALQSQYEEAANAVKLAQDKANATAQVADAKKENKNDNKATENKTTSEATSSSNAGSISQGDGSAHGIVAGNTYPWGQCTWYVKQVAPWAGNNWGNGGQWGSSAAAAGFRVDHSPAAGSIIVFLPGQSVGGQWTADGAYGHVAYVESVNGNSVTISQGGMGFSNPAGPNTQTISGA…	Secreted antigen GbpB/SagA/PcsB, putative peptidoglycan hydrolase
NODE_15_length_26594_cov_105.297956	fig|1578.617.peg.399	13855	12875	-	3-oxoacyl-[acyl-carrier-protein] synthase, KASIII (EC 2.3.1.180)	2.3.1.180	atgacagccgtaaaaattaccgcaagtgcggggtatcttcctgaaaaggtagtgactaatgatgaattgagtcagttgatggatacgtccgatgaatggatcgtgtcccatactgggatcaaaaaacggcactatgcgatcgctgaaaatacgtcagatctagctacaaaggtcgcccaaaagttattacagcaagctaagttagatgcgacaaaaatcgatctgatcatcgtatcaacgatcacccccgatgctttaacaccagcgacagctgcgatcgtccaaaaaaatatccaagctagcaatgcttttgcgtatgacttatccgccgcatgtgcgggctttatctttgcgctggcaactgctgaaaaatttatccacagtgggatgtatcagcgg…	MTAVKITASAGYLPEKVVTNDELSQLMDTSDEWIVSHTGIKKRHYAIAENTSDLATKVAQKLLQQAKLDATKIDLIIVSTITPDALTPATAAIVQKNIQASNAFAYDLSAACAGFIFALATAEKFIHSGMYQRAMVISAETNSKMMDFTDRTSAVFFGDGAAGVILEKSAGNTAYLAEKIATQGNTEVIHSGRVAPLQKVAADNYPQLDAFYQDGRAVYNFVTNDVNAHIAEFLADNGIKPTDLDLVITHQANLRLIENIAQYLALDIDKFAINVTEAGNTSSVGIPLALAQALEQGKRPKKVLLTGFGAGLAYGSILLDLSEFGK	3-oxoacyl-[acyl-carrier-protein] synthase, KASIII
NODE_15_length_26594_cov_105.297956	fig|1578.617.rna.2	14073	13985	-	tRNA-Leu-AAG		gcgggtatggcggaattggcagacgcgtcagactaaggatctggtgagcaattgagctcgtgatggttcgaatccatttacccgcatca		tRNA-Leu-AAG
NODE_15_length_26594_cov_105.297956	fig|1578.617.peg.400	14567	14124	-	Putative metallopeptidase (Zinc) SprT family		atgaatgagcaacaacttcaagcattagtcgaagagctctcattgcggtatttcaaacgtccttttatccaccgcgcttacttcaatcgacgtttgaaaaccactgggggccgttatttattgatgagtcatgacatcgagatcaatgaaaagatgttgacagaacatggcaaagctacccttatcggaacgatcaagcatgagctttgtcactaccatctacatttaacaggacagggatatcggcatcgtgatcaggattttaaacaattattgcatcaggtcggaggtttacggtatgctccagctagtagtaagaattaccgctacacttactgttgtcaaaagtgcgggcaaagttatctacgccaacgtcaaatcgatatcaaacgttttgtc…	MNEQQLQALVEELSLRYFKRPFIHRAYFNRRLKTTGGRYLLMSHDIEINEKMLTEHGKATLIGTIKHELCHYHLHLTGQGYRHRDQDFKQLLHQVGGLRYAPASSKNYRYTYCCQKCGQSYLRQRQIDIKRFVCSRCHGKLRLLKKV	Putative metallopeptidase Zinc SprT family
NODE_15_length_26594_cov_105.297956	fig|1578.617.peg.401	16743	14560	-	Transcription accessory protein (S1 RNA-binding domain)		gtggaagcagattacttacaattagttgagcaacagttagcctatcgtcctgatcagatcaagcaagttctaaaattagttgaagaaggcaatacgatcccatttatcgcccgttatcgtaaagaagcgacgggaagcttagatgaagttcaattgcgtgagatcaccgcaacttaccagcaagttgaaaaacttgaaaaaagacgggctgatgttacagctaaaatagctgagcaaaagaaattaacacctaaactagagcaacagttagctcaagccaaaacattacaacagctcgaagacctttacctaccgttcaagcaaaaacggcagacaaaagctcagatcgcacgtcaacgaggcttagaaggtctagctaaatttttactgacagatagc…	MEADYLQLVEQQLAYRPDQIKQVLKLVEEGNTIPFIARYRKEATGSLDEVQLREITATYQQVEKLEKRRADVTAKIAEQKKLTPKLEQQLAQAKTLQQLEDLYLPFKQKRQTKAQIARQRGLEGLAKFLLTDSQEDVISQAQKYVDPKKGLKTPKEALAGAHEILAEAFGEDASLRAWVRKHAQTKGKLVAKVKDESLDEKGIYQDYYRFEEGIKTILDHRILALDRGEKEKILQVKVKLDDEYVLRYFHARIIGQKSGPSMQYVEQAYTDAYRRFIRPAIERELRKELTARAAASAIAVFGDNLYHLLMQAPLKGKTVLGLDPAFRTGCKLAVVDPTGKFLAKAVIYPHEKAKGKRPDPKKRAQAKQTLLELLEKYQVEMIAIGNGTASRESESFVAE…	Transcription accessory protein S1 RNA-binding domain
NODE_15_length_26594_cov_105.297956	fig|1578.617.peg.402	16870	18645	+	ATP-dependent DNA helicase RecQ		ttgacaccaaaagcagcacttaaacattactttggttataccgaatttaaagccggccaaaaaaaggtgatcgacttgctcttagaacataaaaatactctcgcactcttaccaactgggggcgggaaatctctgtgctatcagatcccggcactcttagaagatggtttgaccttagtcatctctcctttgatctcactgatgaaagaccaagtcgatagtttacaacaaaatgggatccccgctgcctttatcaacagttcccaggaatttgaaactgctaaagcggtcttaacaaaagcccgccggcatgaattaaaattgctctatatcgcgcctgaacgcttagaaaatcaatttttcttagagttactacagacattaccggtttctttagtc…	MTPKAALKHYFGYTEFKAGQKKVIDLLLEHKNTLALLPTGGGKSLCYQIPALLEDGLTLVISPLISLMKDQVDSLQQNGIPAAFINSSQEFETAKAVLTKARRHELKLLYIAPERLENQFFLELLQTLPVSLVAVDEAHCISQWGHDFRPSYLKLPALLAQLPVSPTLVALTATATPQVAQDIKELLMIPAENEVKTSFARDNLTFKLIKGTDFEHYLLSYLKQNPNDSGIIYASTRKKVEQLGIMLNKMGIKAGIYHAGLSELQRRESQEDFLYDRIPIMVATNAFGMGIDKSNVRFVIHAQVPGSLEAYYQEAGRAGRDGLPSEAILFYKDADLQVQRFFIDNSQADEQHREFDYQKLQALTRYANTEECLQRFLVQYFGQDCPDCQKCTNCTDTRE…	ATP-dependent DNA helicase RecQ
NODE_15_length_26594_cov_105.297956	fig|1578.617.peg.403	19581	18754	-	NAD synthetase (EC 6.3.1.5)	6.3.1.5	atgagaacattacaacaagagatcattactgaattaaaagtccaaccaacgatcgatcctgaagttgagatcagacgctcgatcgattttataaaagcttacctgtgcaagcatccatttttaaagacccttgtattagggatctctgggggccaagattcaacgttatgtggcaagttatgtcaaatggcgatcactgaattgcgtgaaaagacaggtgatgacagttataaatttatcgctgtgcgcttaccttatgggacccaggccgatgaaagtgatgctttggatgcgatcgaatttatgcaagctgatgaaatgatgcgagtcaacatcaaagaagctgccgatgcaatggtagcagcagttcaagctaatgatgtgacggtaagtgacttt…	MRTLQQEIITELKVQPTIDPEVEIRRSIDFIKAYLCKHPFLKTLVLGISGGQDSTLCGKLCQMAITELREKTGDDSYKFIAVRLPYGTQADESDALDAIEFMQADEMMRVNIKEAADAMVAAVQANDVTVSDFNKGNIKARQRMIAQYAIAGANSGAVVGTDHAAEAITGFYTKFGDGGADIMPLWRLNKRQGRAMLEVLGAPEHLYQKTPTADLEEDRPALPDEVALGVTYDDIDDYLEGKEVRADAAEKIENWFVKTRHKRHLPITVYDTFWK	NAD synthetase
NODE_15_length_26594_cov_105.297956	fig|1578.617.peg.404	21065	19596	-	Nicotinate phosphoribosyltransferase (EC 6.3.4.21)	6.3.4.21	atggttaaattatatccagacgacagttatacattgcatactgatgcttatcagatcaatatgatgcagacatattggcgccagggtctggcagagcgtaaggcaatttttgaagtttattttcgtaagctgccgtttcaaaatgggtatgcgatttttgcaggcttagagcgcattgttgattatattcaaaatttgcgctttacaaaacatgatctcgcctacttaaaagagatcggcgactatccggatgattttatcgaatatctccgcaattttaaatttaaagcgacgatccgttcagtcgttgaaggggaagtcgtcttcaacaatgaacctttgctccaagtggaaggcccattggtagattgccaattagtcgaaacagcgatcttgaat…	MVKLYPDDSYTLHTDAYQINMMQTYWRQGLAERKAIFEVYFRKLPFQNGYAIFAGLERIVDYIQNLRFTKHDLAYLKEIGDYPDDFIEYLRNFKFKATIRSVVEGEVVFNNEPLLQVEGPLVDCQLVETAILNIVNYQTLIATKAARVRSACGDDALLEFGTRRAQEFDAALWGTRAAYIGGFDATSNVRAAKIFGIPASGTHAHALVQAYRNDYDAFMAYAKTHKDCVFLVDTYDTLRSGVPNAIKVAKELGDQINFLGVRIDSGDMAYISKRVREQLDEAGFPNAKIYASNDLDEKTITNLKMQGAKIDVWGVGTKLITAYDQPALGAVYKMVAIEDENGVLEDTIKISSNAEKVSTPGRKQVWRITKKTDGKSEGDYITIGDEDPRKEKSLYMFHP…	Nicotinate phosphoribosyltransferase
NODE_15_length_26594_cov_105.297956	fig|1578.617.peg.405	21211	21945	+	N-acetylmannosaminyltransferase (EC 2.4.1.187)	2.4.1.187	atgcaaaataattttgagactgtaaatgttttggggcttgattttatcaaagccacccaaactgaatttttggaacaactaaaacgcgatagccaaactaaagctaaccgttttatcgtgactgctaaccctgagatcgtcttagcagctaaagatgatcttgcctacgctaaaactattcgtagtgccgattatgtcacagctgatgggatcgggatcatcaaaggggctaagatcttaggtgatcctttacctgagcgtgtgactggctatgatacgctggtcgccttactttcttttgccaacaaacatcaaaaacgcgtctttttcttaggtgctagaccagctgtcttacaacaagttttaactaaagtagctaccaactatccaaacctagtg…	MQNNFETVNVLGLDFIKATQTEFLEQLKRDSQTKANRFIVTANPEIVLAAKDDLAYAKTIRSADYVTADGIGIIKGAKILGDPLPERVTGYDTLVALLSFANKHQKRVFFLGARPAVLQQVLTKVATNYPNLVISGSCDGYFKDEAKVAEQIKQAEPDFVFVALGFPKQEFFIAKYQDLASAIWIGVGGSFDVLSGQTKRAPKWWIDHHLEWAYRLLKEPSRFFRMLALPKYLLLVYREKYLKY	N-acetylmannosaminyltransferase
NODE_15_length_26594_cov_105.297956	fig|1578.617.peg.406	22087	23079	+	preQ1-regulated inosine-uridine nucleoside hydrolase (EC 3.2.2.1)	3.2.2.1	atgaatgcaactcttcgcaaaaaagtcattatcgactgtgaccctggtatcgatgatagtctagctttgatgctagcgctcgcatcacctgaacttgatgttctcgggatcaccacagtcgctggtaatgtcccttcagatctaggtgctaaaaatgcactcaaaattttagctcattgtcatcaattaaagatccccgtttatcgtggtgcagatcgacctttaaagcgtgactatgtcagtgcccaagatacccatggaaatgatggtttaggtcaaagcaaactgcctgaaatacataaaaactatcactcaaatgcttgtgaatttatcaatgaaacgcttagaaaagagcaagatgtaacgctcattgcacttggtcctttgactaatatcgtt…	MNATLRKKVIIDCDPGIDDSLALMLALASPELDVLGITTVAGNVPSDLGAKNALKILAHCHQLKIPVYRGADRPLKRDYVSAQDTHGNDGLGQSKLPEIHKNYHSNACEFINETLRKEQDVTLIALGPLTNIVLAHQKDPKVWQNCTRFVSMGGNFKSFGNCSPVAEYNYWCDPEAAAYCFEHLPVKLEMIGLDVTRKMLFTPNILELIYQNAPKEAEFIQKITRFYFDFHWQYEKVIGCVINDPLAVLYTIFPELCAGFDANTQIVTSGVALGQSIVDEKNFWHRSPNSHVLVKVDALKAMQLFLARTCGLDPEMLAQVLPQITSLEGK	preQ1-regulated inosine-uridine nucleoside hydrolase
NODE_15_length_26594_cov_105.297956	fig|1578.617.peg.407	23079	23633	+	hypothetical protein		atgcttaaaaaaatgacaccaaaaacattgacgctctgtgctttcgggatcgctttaaatatcgttggtagtaatctagccttatttttacatctaccactttaccttgataccctaggaacaatgctttgtgccgctttgcttggcccactcttaggcatgcttgttggcgcaagtaccgccctttttgttggcctgactactgatgttttttccttgtattattcgccgatccaattattgatcggggcgatcgttggtctgcttttcaaatatctccgttcccctaaaaattggcagatcttaggcgcagctggtgtgatctctttacctggaactttgacgagtaccgcgatcacttacttcttatttaacggtatcactagttcaggttctagc…	MLKKMTPKTLTLCAFGIALNIVGSNLALFLHLPLYLDTLGTMLCAALLGPLLGMLVGASTALFVGLTTDVFSLYYSPIQLLIGAIVGLLFKYLRSPKNWQILGAAGVISLPGTLTSTAITYFLFNGITSSGSSMLVQLLSGLGLQKALAIFLVQLGTDYLDRLLTFYLVLLIVSALKKRQLFTA	hypothetical protein
NODE_15_length_26594_cov_105.297956	fig|1578.617.peg.408	24382	23684	-	Predicted transcriptional regulator of N-Acetylglucosamine utilization, GntR family		atgggttcaccaatttacattcagatccataacaaaatcaaacaagagatcgaagccaatcgctgggcagtcggtgatcggatcccctcagagcgcgatctagcggtgcagtttggtgtcagtcgaatgaccttgcgtcaagcgatccagactttagttgaagaagggatcttagagcgccatatcgggtcaggcacttatatagcgcgcaaaaaggtccaagaaaagatgtctggagtcacgagttttacggagttgacagaagcgcaaggaaagacgccttccagtaagacggtctcttatttggtgactgccccttcgcttagtgaaagtgagcatttaaagttaaagcctggtcaaaaagtcttgcgaatggagcggatcagatatgccgatgaa…	MGSPIYIQIHNKIKQEIEANRWAVGDRIPSERDLAVQFGVSRMTLRQAIQTLVEEGILERHIGSGTYIARKKVQEKMSGVTSFTELTEAQGKTPSSKTVSYLVTAPSLSESEHLKLKPGQKVLRMERIRYADEVPICFEVATLPYDLIKDYARKQITNSLYGTLQENGLTIGHAQQTVSSMLASEKIAEYLDLKRGSAILRLRQITRLGDGRPFEYVRTQYAGERFEFYLEK	Predicted transcriptional regulator of N-Acetylglucosamine utilization, GntR family
NODE_15_length_26594_cov_105.297956	fig|1578.617.peg.409	25543	24407	-	N-acetylglucosamine-6-phosphate deacetylase (EC 3.5.1.25)	3.5.1.25	atgagcaaagttatcaagcatgctgttgtttacaccggggaagataagatagatgacgcctatattcgatttgatgagcagatcgaggcgatcggtccaatgagtgagtatcgagtttcaccagctgatcaagaggtgatcgatgttgaaggtaagctcatcgtgccgggttttatcgatgtacatagtcacggtggctataattttgatgccatggatggtaatgcaaaagaattgagtgaaatggtcgatgatatggtctatgaaggtgtcacgacttattttccaacgacaatgacccaatcaccagaaaatattgcccatgcgatgacagcgatcaaagaagcggcggctaagaatcaagttattcaaggtatccacttagaaggtccttttgtt…	MSKVIKHAVVYTGEDKIDDAYIRFDEQIEAIGPMSEYRVSPADQEVIDVEGKLIVPGFIDVHSHGGYNFDAMDGNAKELSEMVDDMVYEGVTTYFPTTMTQSPENIAHAMTAIKEAAAKNQVIQGIHLEGPFVSPVFKGAQPEEYIQAPDTKLFDHWNELSGNMIKLVTYAPEHETSPEFEQYCLEHGIVPSVGHSNATREQMKHSRASHVTHLYNAQREFKHREPGVTGHALLEDNIYCELIADGFHVCPDMIKLAYELKGPDKIELVTDSMRAKGIPEGVSELGGQKVIVKDKQARLESGNLAGSVLQYKDAFVNIMKFTGCSLEDAIKMTSLNQAKEFGLTQKGVLAVGKDADFNVFDHELDLVETYSFGRRFKK	N-acetylglucosamine-6-phosphate deacetylase
NODE_15_length_26594_cov_105.297956	fig|1578.617.peg.410	26418	25618	-	Pyrroline-5-carboxylate reductase (EC 1.5.1.2)	1.5.1.2	atgaaattaggatttatcggtgctggaaatatggcacgggcaattatcaatggttggtcaagtcaagggcaaaaagctgagatctatctccacagcgcccataaagcaagctatgaaccatatgctaaagaacatggactacacgcttgtactagcaatacagaggtcgtttcaaaggcagacattattttcttagcagtcaaaccgcttgtgttagctgaggtcttacacgagatcaaagaaaccgtccaagccaaaaagccagtcgtcgtttcgatggtgacgggagtatctatcgcagagatcgctgatttgttagagctgacacctaaagagctagaggtcattaggatcatgccaaatgtcaatgcagagatcgcagcaggaatgacagctttg…	MKLGFIGAGNMARAIINGWSSQGQKAEIYLHSAHKASYEPYAKEHGLHACTSNTEVVSKADIIFLAVKPLVLAEVLHEIKETVQAKKPVVVSMVTGVSIAEIADLLELTPKELEVIRIMPNVNAEIAAGMTALNASPAVTETNFLRVKGLFEMIGQTEILPEKDFSTFVALAGSSPAYVYFFIDAMSRAGVKYGLKKDQATKIAAQAVLGSAQKVLADQKTPMQLVDDVCSPGGTTIAGLLAMEEAGFMTAVIKGMDATINKDQGK	Pyrroline-5-carboxylate reductase
NODE_15_length_26594_cov_105.297956	fig|1578.617.rna.3	26555	26484	-	tRNA-Gln-TTG		tgggctatagccaagcggtaaggcaacggtttttggtaccgtcatgcgctggttcgaatccagctagcccaa		tRNA-Gln-TTG
NODE_160_length_1851_cov_92.863586	fig|1578.617.peg.411	1	579	+	hypothetical protein		tttaacttttacacaattatatggactttatcccacctaaattcaaaatatttagaagagtacgttaatttagccaagaaattaggggtaacaataagttttagtatattatcagcatgttttgaaggagaattgctaaattatttaccaaacgatgaagatctacaaactattagtcaatttatgaaaaagacggatatggcgatcgaggacagtagtatcgtagaaaaatttcatgctgaaaactattgtggggcgggtaagacaataatctcagtaggaacggatggcaatgtttatccttgtcatatgttgatgtacgatgaattttgtttaggaaatattagaaaagaatcattaatagatatactgaaacattcacagaaattaaatgtattc…	FNFYTIIWTLSHLNSKYLEEYVNLAKKLGVTISFSILSACFEGELLNYLPNDEDLQTISQFMKKTDMAIEDSSIVEKFHAENYCGAGKTIISVGTDGNVYPCHMLMYDEFCLGNIRKESLIDILKHSQKLNVFKNLNVDKLSGGCKECPFKYFCGGGCRARSYMKYRNVTTRDPYCVLFKDYYGEMTEEMFK	hypothetical protein
NODE_160_length_1851_cov_92.863586	fig|1578.617.peg.412	589	1827	+	hypothetical protein		atgcaaaaaatactcctgagacaaaaatatagaattagcttatttgtgctattgtcgctgatagtaggtttgatagatatctcttttgcattgatcattcaattgtttatcaattctattgagaatagtaaattattaatttttcagatttcggtgttattattcatactttttgtgatgcttaattattttatgacttactggcaaatcaaatttcaatcagaaattcaaaagaggatccatatagatataaagagacgcttgataaatttttgtatgtttgctgattttgaatattttcaagaaacatctattggagagaaaataaattattttgaatattatatggacgtttatgagcagtactatttgaacaatatattagaattgatcgccaat…	MQKILLRQKYRISLFVLLSLIVGLIDISFALIIQLFINSIENSKLLIFQISVLLFILFVMLNYFMTYWQIKFQSEIQKRIHIDIKRRLINFCMFADFEYFQETSIGEKINYFEYYMDVYEQYYLNNILELIANIFVLIIGISYLLSVSVVITIVIFVLGIISLIIPIILGKIINTMVDENAELNSKFLSTIKEIMTGMEVIRGYRAEERFITEFNGNLESLEKNTQILSVTNGKLNQISALIQYVMIILCLIITGSGVIVGNLNLGQLVAVTQVSNMLIMPMQQIGMAILDIGGSKSIREKLNNLVNYGDDHNCCLEKCEEKIESIEFRNLSLESKNGHKILDNIDFVFKSRKKYAVVGDNGSGKSTLFQVILGIRKNYSGNVFVNGKDLKGKIITNIS…	hypothetical protein
NODE_161_length_1821_cov_113.417785	fig|1578.617.peg.413	2	805	+	DNA-directed RNA polymerase beta' subunit (EC 2.7.7.6)	2.7.7.6	cgtgtgcaagaaatctttgaagctcgtaatcctaagggtcgtgcaacgatcacagaagttacgggtgtcatccaatcagttgaagaaaatccagctgaacgtacaaaagaagttacagttcaaggtgaaacagatacgagaacatactccctaccatttacttctgtcttgaaggtaaaagaaggcgactatgttcaccgtggtgaagccttgacagtaggttcgatcgatcctaaggaattgatcaaagtgcgtgacgtcttatcaacagaaaactacatcttgcgtgaagttcaaaaagtttaccgtatgcaaggggtagaaatttctgataagcacgttgaagttatggcgcgtcaaatgttgcgtaaagttcgtatcatggatccaggtgacacc…	RVQEIFEARNPKGRATITEVTGVIQSVEENPAERTKEVTVQGETDTRTYSLPFTSVLKVKEGDYVHRGEALTVGSIDPKELIKVRDVLSTENYILREVQKVYRMQGVEISDKHVEVMARQMLRKVRIMDPGDTNMLPGTLMDINDFKDNNVDTLINGGIPATARPVLLGITKASLETNSFLSAASFQETTRVLTDAAIRGKNDPLIGLKENVIIGKIIPAGTGMKKYRDIVPEEVGTASDSVYSISDVEKSLEAKEAMAAVKADDEN	DNA-directed RNA polymerase beta' subunit
NODE_161_length_1821_cov_113.417785	fig|1578.617.peg.414	1820	864	-	Non-specific ribonucleoside hydrolase RihC		actattgacaaaagtcacttcataacaggtgaattattgatgaaacacaaaattattttagatactgatcccgggatcgatgatgcagtgatgatctcaactgccctgaccgatccccagctagatgttgctttgatcactactgttgctgggaatgtaacggttgataaaacgactaaaaatgctttgaaactggtcgactttttcaacaaagacgtacctgtagcagccggtgcaactgatccattgatcaaaaaattcgaggatgcggctcggatccacggtgaaagtggaatggcaggctatgacttccccgaaccaacaagcaagccacttactttgcatgctgtccaagctttacatgaaacgctcaaaaacagcgcagaaccaataactttg…	TIDKSHFITGELLMKHKIILDTDPGIDDAVMISTALTDPQLDVALITTVAGNVTVDKTTKNALKLVDFFNKDVPVAAGATDPLIKKFEDAARIHGESGMAGYDFPEPTSKPLTLHAVQALHETLKNSAEPITLITTGAYTNIALLLREYPEIKPKIKQIIAMGGSLGRGNMTSAAEFNVFTDPHAAQIMYSSQIPLVMVGLDVTLAGRISDETTAKLKQFGRAGQMLHDIIGHDFDHDEKGTAIHDLQTLFYLEHPEAFETKDYWIDIVTEGPAVGETVADIRGAYHDGKTNAKVCVGIDTVAFNQWLLDKVSQNMQN	Non-specific ribonucleoside hydrolase RihC
NODE_162_length_1802_cov_5.006783	fig|1578.617.peg.415	2	559	+	hypothetical protein		aacaatatgagtcgagaattttatgcagatatcgacaatttcaaagtagacgcaaaaggaaatatcagcatcacagaaaagctggcaggatcagcactgaagaataagcttgatgagcttcaaaagttaaaagcagatggcgtagttcgggtaacgatcgagtcagctgtgacacgttacacagaaaaaattgacgcagaaacacttgaaccagtcgaatattacgaacgtgatattaagggcgtttggaccacagtagaaaacgaacagactagtttagacgttggtgaagaacaaacgatcgaacgtgaagaagagatcacagcagatgttgtagacaagttcttgctaactgaaaaatatgaactcaagagtgattttgaccctaaaaaagttttg…	NNMSREFYADIDNFKVDAKGNISITEKLAGSALKNKLDELQKLKADGVVRVTIESAVTRYTEKIDAETLEPVEYYERDIKGVWTTVENEQTSLDVGEEQTIEREEEITADVVDKFLLTEKYELKSDFDPKKVLIRIAEGYTFDEIASELKAESASELIKKLNEARIEYAGMAKAWYEVKEDDDEE	hypothetical protein
NODE_162_length_1802_cov_5.006783	fig|1578.617.peg.416	549	1028	+	hypothetical protein		atgaagaataaagctggtacgcattttgggcgcaaggtggagttggacggatacgtgtttgactcacaaaaagaagctgacttctatcaacgctttattaagaacagtggctatcagtttgaagtacatccacgctttgtactggaagaagcaaccatgatgacggctatcacgtatgcaccagattttgttgtatacgatcgcaacggtcatatcttgcatgtttacgatgtcaagtctagtttagacgggcgctatggtgttaatactacagctaaattgcggtttaacctattccaacggaaattcaaaaaagcggtcgaagctgtcgtgccacgaaagaatgacttcaaaatgcggatttatggtctaagaaagaacgtcaacacccgccaaatt…	MKNKAGTHFGRKVELDGYVFDSQKEADFYQRFIKNSGYQFEVHPRFVLEEATMMTAITYAPDFVVYDRNGHILHVYDVKSSLDGRYGVNTTAKLRFNLFQRKFKKAVEAVVPRKNDFKMRIYGLRKNVNTRQISPKGKVQFYDIMQNIDYDPAKILTWR	hypothetical protein
NODE_162_length_1802_cov_5.006783	fig|1578.617.peg.417	1033	1278	+	hypothetical protein		atgagcaagtattacgtaattaagctgtattatccgagttatccaaaaaatcaaacatatggatatttaaaacaggggcagtttggtgtatatcgctacacatctgattactggaaggcagctaaattcaagagcagagagaaggctcaagaatacatgaataaacaaggaccatacaaagtaccgcatgagatctgtaaagtcacgatcgaaacggtggctaaaggtcgaagtaccagaagatga	MSKYYVIKLYYPSYPKNQTYGYLKQGQFGVYRYTSDYWKAAKFKSREKAQEYMNKQGPYKVPHEICKVTIETVAKGRSTRR	hypothetical protein
NODE_162_length_1802_cov_5.006783	fig|1578.617.peg.418	1558	1749	+	hypothetical protein		ttggtaaagggagtgtggaatgcactaaatattttaggtgtggcagggttactagtagctatcttgattagaatgtcgcaaggatactttatcaatgctttagtacttgtcggcttattggtagcttacttagtcagtgtatgcgtggtcaagttatatgagatcgtagatctgatgaggacgagaaaatga	MVKGVWNALNILGVAGLLVAILIRMSQGYFINALVLVGLLVAYLVSVCVVKLYEIVDLMRTRK	hypothetical protein
NODE_163_length_1785_cov_118.253425	fig|1578.617.peg.419	1	1083	+	Putative Dihydrolipoamide dehydrogenase (EC 1.8.1.4); Mercuric ion reductase (EC 1.16.1.1); PF00070 family, FAD-dependent NAD(P)-disulphide oxidoreductase	1.8.1.4	taccatatgctagccgatgagccgactgtgcgtgttttagatgggacagctaaatttaagtcagaccatgtagttacagtaacgacgcctactggtgagacactagattttgaaggggaacggatctttatcaatactggggctgaaccagtgatattgccgatccaaggtttagctgatagcaagtatttattggattcaactagtgctatggatcaaagcgatctgcctaaagaattagtgatcattggtgctggttacatcgggcttgaatttgctagcatgtttgctaattatggtgctaaagtcactgttttggatgcttcagataagtttattccaagagaagatgatgatatttcccaaatggtctttgatgacttgagtgctttggggatc…	YHMLADEPTVRVLDGTAKFKSDHVVTVTTPTGETLDFEGERIFINTGAEPVILPIQGLADSKYLLDSTSAMDQSDLPKELVIIGAGYIGLEFASMFANYGAKVTVLDASDKFIPREDDDISQMVFDDLSALGIDFKLGVKIKEVYDLEDKVEIVYEKDGEHTVTADKVLAATGRKPRTSDLGLENTAIKLDDRGAVVVDDQLHTSVPSVWALGDVKGGLQFTYISLDDFRIVKDELFGAGKRRISDRKNVPYSVFIEPPLSKVGLNEKEAKAAGVEYKLFKLPVAAIPKARVLKDTRGLFKVLVDPETDLILGATIYAKESHELINLLSLALNAKLPYTMLRDQIYTHPTMSEALNDVLK	Putative Dihydrolipoamide dehydrogenase
NODE_163_length_1785_cov_118.253425	fig|1578.617.peg.420	1101	1742	+	Oxidoreductase		atgaaaatttttgtagtcggtgctacaggtcgagttgcatcagaattggtcaaagatctagtggctaaggggcatcaagtgaccgcagctgcacgtcatcttgaaaatgtcttattgaaagattctccccaagtgacggccgtcaaattagacctgcatgcttcaaaagaagaattggcagcgttgatcggtcaacaggatgcgatctactttacagctggttcacgggggaaagatctcttacaaactgatgcctttggtgccgttaagacgatgcaagctgctgagttgaatggtatcaaacgttatatcatgttgagctcattacatgctttagaaccagaattttggcatgaagatggtttggctcagatcatggattataatattgccaaattc…	MKIFVVGATGRVASELVKDLVAKGHQVTAAARHLENVLLKDSPQVTAVKLDLHASKEELAALIGQQDAIYFTAGSRGKDLLQTDAFGAVKTMQAAELNGIKRYIMLSSLHALEPEFWHEDGLAQIMDYNIAKFFADHYLVHNTDLDYTILQPTALTEESGTGKITVGATKVSKNPIPDVALTLAEILEHDNTRKKVIMMSSGDTPIEQALASV	Oxidoreductase
NODE_164_length_1721_cov_126.326422	fig|1578.617.peg.421	653	78	-	4-methyl-5(B-hydroxyethyl)-thiazole monophosphate biosynthesis enzyme		atgacaaaaacagcagcagtgatgatcgcacctggttgtgaggaagttgaagcactatcaagcgttgatgttttacggcgtgccgggatcaaatgtgatatggtcggtttattcgataagatcgtcaatggtgaccatgatatcatcttgacttgtgataaggtcatggatgaaagtttattggactatgatatcgtgatcttcccaggtggtctacctggttcagaagctttgcgtgacaatgaaacattgcgtcagttcatggtcgaacgtaaaaaagctggtaagtggaatgcggcgatgtgtgctgctccgatcgcttttgcacgctatggcttattggatgatagccaatatacgttatatccaggaatggaagctgggatcgcagatgaagtc…	MTKTAAVMIAPGCEEVEALSSVDVLRRAGIKCDMVGLFDKIVNGDHDIILTCDKVMDESLLDYDIVIFPGGLPGSEALRDNETLRQFMVERKKAGKWNAAMCAAPIAFARYGLLDDSQYTLYPGMEAGIADEVKHGNFDEALVVVDEKNHLITSRGPATAWAYAYEIAKVLGADVDKLKDGMLYNMLMLSR	4-methyl-5
NODE_164_length_1721_cov_126.326422	fig|1578.617.peg.422	898	1512	+	hypothetical protein		atgtcaacacttttggtcatccaagcatactctaaagataaaaatgcgcatttggatcggcttaaccagcattttattacaagttatcaacaagctcaccccaaagatcggatcatttctcatgaccttaccaaagatgacacgcctatattaaattcacagatgttaatggccttacgaaaaaagcaacatcaaaaaccattatcatcgtttgaacaaaagttgctgtgtgagcatgatgactggcttagtgatttcatgcttgctgataaatatcttttcgttgctccgatccaacaacagttcttacctgcggagctcaaacaatatttagatctgatcataagctcattggctgagttgtcaccccacaaaaaagctttgcatctccaagcaaca…	MSTLLVIQAYSKDKNAHLDRLNQHFITSYQQAHPKDRIISHDLTKDDTPILNSQMLMALRKKQHQKPLSSFEQKLLCEHDDWLSDFMLADKYLFVAPIQQQFLPAELKQYLDLIISSLAELSPHKKALHLQATNRTYHRSLKYFWDTYRHKHNLGNKYLQKLLSFHGLKNFTTLHIEGLANCCTSCDLSLKHCQKQLTKIANAF	hypothetical protein
NODE_165_length_1687_cov_648.049577	fig|1578.617.rna.4	1550	1	-	LSU rRNA # 23S rRNA, large subunit ribosomal RNA - 3 prime truncation		taggttaagttattaagggcgcatggtggatgccttggcactaggagccgatgaaggacgtgactaactgcgataagcttcggggagttgtaagtaaactgtgatccggagatttccgaatggggaaacccagcaggagtaaagacctgttatcactgagtgaatacatagctcagttgaaggtagacgtggggaactgaaacatctaagtacccataggaagagaaagaaaattcgattccctgagtagcggcgagcgaaaagggaacagcccaaaccagagagcttgctctctggggttgtaggactggacatttgagttaccaagaaacgaagtagttgaatgatttgggaagatcagccagagaaggtgatagccctgtaagcgaaacttcgttt…		LSU rRNA # 23S rRNA, large subunit ribosomal RNA - 3 prime truncation
NODE_166_length_1671_cov_139.374237	fig|1578.617.peg.423	1661	3	-	hypothetical protein		atgaagaatataaaaacaaatagtatagtgctgctaatttttttggtgatcacggtatgcatgatctatcctctagttgcaacaggcagaattgcagctcaagtcgattggttatttcacgcggcacgtgtagagcagatctatcgtaatttgagtgaggggagtctatttacttatatagcaacttctacctttcaaagtacaggtgtcgggtcatttttattttatccagtgatctttatttatccttgggcatggttgcgttttattacaacaccaatagctgcttactatatttgggtgggggcatttatgtttatgaccttcgtgatcagctatttttctatgctatctttttcgaaggggaaatatcttaggagttttatctttgcactcctc…	MKNIKTNSIVLLIFLVITVCMIYPLVATGRIAAQVDWLFHAARVEQIYRNLSEGSLFTYIATSTFQSTGVGSFLFYPVIFIYPWAWLRFITTPIAAYYIWVGAFMFMTFVISYFSMLSFSKGKYLRSFIFALLYTLAPYRLYLGPASFVVGEYIASTFIPLAFLGFYHIVCGDKRKWYWLTIGMTLLAYSHILSILLISEIFTILLLVAFFKGDLDLKRAKYLLISAGVTVILVLPVIIPLVTDYFGKGITATYPGVGMIQNLGEVFTTSLSNTATSSSIGIVLLLVLLSGWKWIKQDSLELPLYILAICLTLISTAIFPWKSFNGSFLALLQLPYRYLIYVVLLTAILGSRVIVELLAKYGSLKTNWRKAMTVLTVLLVSLISYYGSISNLSDRLANT…	hypothetical protein
NODE_167_length_1654_cov_211.233806	fig|1578.617.peg.424	132	641	+	hypothetical protein		gtgcttgatgattttgctaatgtagctaaagaagatgtacttaagtggcaacttgatcaacttaataaaatgggtgtgctaaacgagcggataatcaagctagtagcaaactatgacggactatcgcaacaagctatttatgactttgtggaagcaaatggaatggcgatcattgacgaaagtgatcaagagttgcaacgtatgcaacataaggctttgcctatcagcgacaaagctagtgatctactagatgcgtttagaaaacaaacttgggatgatctaaataacaacgttaatcagacattgctaacgcgtaactttggcaatagtacaccaatgcgagcataccaagcgattttaaagcaagcgactattgagagaatgacgggactaaaaacc…	MLDDFANVAKEDVLKWQLDQLNKMGVLNERIIKLVANYDGLSQQAIYDFVEANGMAIIDESDQELQRMQHKALPISDKASDLLDAFRKQTWDDLNNNVNQTLLTRNFGNSTPMRAYQAILKQATIERMTGLKTNEQAIKDAIYKQVDAGLKSNMVDKAGHQWSKVIPAP	hypothetical protein
NODE_167_length_1654_cov_211.233806	fig|1578.617.peg.425	614	913	+	hypothetical protein		atggagcaaggttatacccgcaccgtgatcacgacaacggtaaatcgaacgtatcacgagctcagaactcagcgtatgcaagactatggtcaacctagtgggacgcttggtattaattgtcgtcacgacttctatccattctcagaagatataaatactaataaccaacattcgacggtcacaccaaaagaagcgatcaagaatgctggtttgcaacagaaacaacgacagtacgagcgatctattagatatgctaagaaacgcttatcgcaaataggcagaaaaagcttagacagttga	MEQGYTRTVITTTVNRTYHELRTQRMQDYGQPSGTLGINCRHDFYPFSEDINTNNQHSTVTPKEAIKNAGLQQKQRQYERSIRYAKKRLSQIGRKSLDS	hypothetical protein
NODE_167_length_1654_cov_211.233806	fig|1578.617.peg.426	910	1356	+	hypothetical protein		ttgatcaaggatacaaataaaaatggtcaaatcttagctcgtgactataatcgtgaacagatagctactggacctttaaacgagaaggaaatcagtgaaagattaaagcaaaaagttgataagcaaaatcagcatatttatggtacaaaagagtataatgaacgtgtagagagggatcggaaaaagtatatatcggtcaagtatgagcaaccgtatctcctgggatattttctgattgatagtaagcaaatagatgaaattgtcaaaaataatgttgatatgagaaaaatgaacggtaagcaaatcatagctgtagattaccctatcgcatactatcgcacagcgacaaaagatggtaagatgatccaatataaaaccaataggatgaaagtgcatttt…	MIKDTNKNGQILARDYNREQIATGPLNEKEISERLKQKVDKQNQHIYGTKEYNERVERDRKKYISVKYEQPYLLGYFLIDSKQIDEIVKNNVDMRKMNGKQIIAVDYPIAYYRTATKDGKMIQYKTNRMKVHFSKKGCHAVPHTLKKG	hypothetical protein
NODE_167_length_1654_cov_211.233806	fig|1578.617.peg.427	1362	1607	+	hypothetical protein		atgaataaaaagatttttgtaagagagccatatgatatgcacatacttgatgaaataggcgagcaatgggccatcgttacgttaagcgataataatcaagaaagactgtttatcggtggtgttgattttgctgatgataccgaaattggcaaggacgcaatatttgctaacaaaacgggaagcaggaaatattatgaaatagaattagcattggagaatattgaatctattgaagtagacaattaa	MNKKIFVREPYDMHILDEIGEQWAIVTLSDNNQERLFIGGVDFADDTEIGKDAIFANKTGSRKYYEIELALENIESIEVDN	hypothetical protein
NODE_168_length_1585_cov_113.851804	fig|1578.617.peg.428	2	373	+	hypothetical protein		cgtcaaaaagccgagtcgatcaaggaaagtaaaaaagaagtaaaagaccaagctaaagctagacagaagatagcgttgtgggtcgtacagcattatgaaggactagaaccaattaagacgatcggagtgggaaaaatatatacaagtggaatcttagggagtgggggaaaaagtgtatcagtaattataaatgatgaagaaaaaaatataattgatgggatattgataggtgatgatttcaatcctagtcatccaggcgcacaagttgaaaatagcgattataactatgtagaacagacgatgcacaaaaatttagatgggatagagataaaatattgggaggaaaataataatgatgattccaaaaattag	RQKAESIKESKKEVKDQAKARQKIALWVVQHYEGLEPIKTIGVGKIYTSGILGSGGKSVSVIINDEEKNIIDGILIGDDFNPSHPGAQVENSDYNYVEQTMHKNLDGIEIKYWEENNNDDSKN	hypothetical protein
NODE_168_length_1585_cov_113.851804	fig|1578.617.peg.429	354	1583	+	hypothetical protein		atgatgattccaaaaattagtgaatataatacatttacacaacgtgtctataatacagatcctttaaaaggaaaaaaatataaaaaagggcaactgattcctggtacaaactataaaatcctcgatatctcccgcaacggcacctatggcaataaaaagcagtatggtgttcccaatcatatgcaggcgatggcagttgcaccggtaaagaatggcgtggtagactacagccagcttacgattgcttatgttgggactaacccagaggataaagtcgatctagtgactgatgtgatcgatgttgctgatgtggatggcaccttatcccaaactaaaaatctggtcgaaatttttgagccgccagtgagtcaattcgataccgctttaggctatgctgac…	MMIPKISEYNTFTQRVYNTDPLKGKKYKKGQLIPGTNYKILDISRNGTYGNKKQYGVPNHMQAMAVAPVKNGVVDYSQLTIAYVGTNPEDKVDLVTDVIDVADVDGTLSQTKNLVEIFEPPVSQFDTALGYADYIQKRYPKAKITVTGHSLGGSLALTVGAKKYLKTVTFNAPVPKDKLSKKDKQYILDNPTKITSYLNVDDLIGNYNNSYTLFGGLFKGDFQHYYKNGTGMGDIDLEKTLRSLSQGKLVLKNGQTIPVSKEKLAELINENHNVANWFDEKGQLRYSQHKVTVSKTQATFETKVSKADTALAERLAKIRGLRKKYGHKYSVKGGKIKLDAALAYALKAAIKEHGQSGIEVLEQTQKQIEAKLEANWNETLQMARQIGTDLTEAEILEVL…	hypothetical protein
NODE_169_length_1571_cov_89.947334	fig|1578.617.peg.430	552	1	-	hypothetical protein		atggcaatagagacatgggatagtccctatatagtgatttggctatgtttaggggtattagtaacagtgctgacatatggtgtgcgaggatatagtggcaaaataaatggattagaggctattggatatagtatggtaatcggtgctctagctatcttaaacggagcagcgctgggtcagacaatgtatgacaaaacggcgaagtatgatgtttgggggagtttagggacaatgttaggcttatcggggcctttaatagtgagtggcttaacattgatagtgttttatagatgtcgagtagtaaaacatccagatgaattagtagttaggggtaacgatttagaaatgggaggatcctatttattaagtgggataacatggtttatgttttctggattg…	MAIETWDSPYIVIWLCLGVLVTVLTYGVRGYSGKINGLEAIGYSMVIGALAILNGAALGQTMYDKTAKYDVWGSLGTMLGLSGPLIVSGLTLIVFYRCRVVKHPDELVVRGNDLEMGGSYLLSGITWFMFSGLLSGGIGGGYLVDELLGDRKGVIYALSMLLPIIVAIWLIAKYSKWMFKYIVW	hypothetical protein
NODE_169_length_1571_cov_89.947334	fig|1578.617.peg.431	1570	578	-	hypothetical protein		aaaaagatcgatcagacccaaaagacatatcagcgttatctggttcatctagaagaagaacggaataaacgtgaaggaaaaaatgcattgatggttgatggatttttcttcctactaggtggagccatcgctgtagcatcaggtgggacagcagtaccattactattaggatttggtgttggtttagatttgcttaatttatatgaagactatacgaaaatgaagtcgggtaaaaaatatggggataattttataaaggattttttgttacgtctaggaattaatagagagtatgcggaagatacctattcaattttaaatttaattggcggtgtggctggttcaaaaggtgcttttaaatccttagtaaaggaaggacagttcgtaagtaaagggata…	KKIDQTQKTYQRYLVHLEEERNKREGKNALMVDGFFFLLGGAIAVASGGTAVPLLLGFGVGLDLLNLYEDYTKMKSGKKYGDNFIKDFLLRLGINREYAEDTYSILNLIGGVAGSKGAFKSLVKEGQFVSKGIKTKPLLQNSKQVWRDSTSVKNLFNFADDSKVTGSTAKKVMQAFEHDAHAIGDNVKTAKEHKLLLEGVVPKLSEGASGKVITKTYAKETLKQVTFAGVKDVVIAPAASAVTNSVVGNDTSSIEYKMTNKFAGKIISKPVKTAVNVHIGMWKDGLTGGKVTDKIANRAMLREKFGDNSVRSELDNTFDLLRDMKELYTW	hypothetical protein
NODE_16_length_25915_cov_95.842632	fig|1578.617.peg.432	2181	37	-	Lipoteichoic acid synthase LtaS Type IIb		gtgaactggacaaaattacgaaattttatcaatacacggtggggcttttttgcacttgtctcgtgcctgttttggttaaaaacgatcctagtttatttgatcgattttaaccttggtgtccacgggatctatcagtattttatcctgttgataaatccgatcgcgacgacgcttttgctctttagcattgcactttacatccgtaagacgatccctgcctatttatgtctattattactttacatagctaatacggcatttttattgatcagcgttatttattaccgcgaatttactgactttatgactatgaacgtgatctttgggtattcttcggtctcacaaggactaagtgggagctcgttttcgctgttaaaaccccaagatattttgatcatt…	MNWTKLRNFINTRWGFFALVSCLFWLKTILVYLIDFNLGVHGIYQYFILLINPIATTLLLFSIALYIRKTIPAYLCLLLLYIANTAFLLISVIYYREFTDFMTMNVIFGYSSVSQGLSGSSFSLLKPQDILIIIDVVVVLLLLLTRQIKLDKRFIPKNQAVAMTSFSLMFLLLNITLGEIDRPQLLTRTFDRNYLVKYLGIDAFTVYDGLKTAKTSQTRSKATGADLNKIIDFTQANYAAPDQKMFGIAKNKNIIVIHLESFQQFLIDYKLNGQEVTPFLNSLYHGKETFSFANFFNQVGQGKTSDAETMLETGVYGLPQGSMFSTLGTDNTFEAMPAILNQSQNYSSAVFHGNSGSFWNRDKVYKNFGYQYFFDASYYDQNANNLSEYGLKDKLLFHD…	Lipoteichoic acid synthase LtaS Type IIb
NODE_16_length_25915_cov_95.842632	fig|1578.617.peg.433	2577	3437	+	Glucose:proton symporter GlcU		atgtggatagccttgatccccgctttagcttggggaagtattggattgatcagtggtaagttgggtggtaatgctaaccaacaaactttagggatgacttggggggctttgctctttgcaatcgtaacgacaatagttgctccaggaaactttttagcaaataacaattggcaactttgggtagctggtgttttatctggtttgttctggagtttaggccaaaatcaacagtttcacgcaatgaaagcagtcgggatctccaagaccgtgccgctctcaacgggggcacaattggtgactaacgctttagctgggatcttcttattccatgagtggacaacgacgcgccaattatcattaggttcattagccttagttattttggttgtaggtgcggtg…	MWIALIPALAWGSIGLISGKLGGNANQQTLGMTWGALLFAIVTTIVAPGNFLANNNWQLWVAGVLSGLFWSLGQNQQFHAMKAVGISKTVPLSTGAQLVTNALAGIFLFHEWTTTRQLSLGSLALVILVVGAVLTALRDKSANSIEQNEDWKKGTTALVLSTAGYLGYTVVVNLLKVDAQAMVLPQALGMVAGASMFALGKDAFKKESFKNIITGLVWGTGNLCMFQATAMIGLAVSFSLSQTGIVISTFGSILLLGEHKTKKEMVYVTVGSLMVIIGGVMLGLLK	Glucose:proton symporter GlcU
NODE_16_length_25915_cov_95.842632	fig|1578.617.peg.434	3644	4996	+	Glucose-6-phosphate isomerase (EC 5.3.1.9)	5.3.1.9	atggcacacatcaaatttgacagttcaaacttaacaaagtttgttcacgacaatgaattaaacgaaatgcaagcaatggtcaatgccgctgacgaacaacttcgccaaggcactggtgcaggcgcagattttcgcggttggttagatctaccagttgactacgataaagaagaatttgcccgtatcaaagaagcagctaaaaagatccaaaacgattcagaagttttagttgtgatcgggatcggtggttcttacttaggtgcacgtgcagcgatcgatttcttgcaaaacacgttctacaacttgttaccgcaagaaaaacgtaatgcaccacaaattttctttgcaggtaactcgatctctggttcatatgttcatgacttggtcgaactcatcgga…	MAHIKFDSSNLTKFVHDNELNEMQAMVNAADEQLRQGTGAGADFRGWLDLPVDYDKEEFARIKEAAKKIQNDSEVLVVIGIGGSYLGARAAIDFLQNTFYNLLPQEKRNAPQIFFAGNSISGSYVHDLVELIGDKDFSVNVISKSGTTTEPSIAFRVFKEKLVEKYGEEGAKKRIYATTDRARGALKTEADAEGYETFVIPDDVGGRFSVLTPVGLLPIAVSGADVDALMQGAADARSEYTDADLAKNEAYQYAALRNILYRKGYTTEILENYEPTLQYFAEWWKQLMGESEGKDQKGIYPSSANFTTDLHSLGQYIQEGRRNLMETVIHVGTPTHDTEIPKEEENLDGLAYLEGKTMNYVNDRAMEGVVLAHTDGDVPNMIVNIPDQTAYTLGYLIYF…	Glucose-6-phosphate isomerase
NODE_16_length_25915_cov_95.842632	fig|1578.617.peg.435	5746	5042	-	hypothetical protein		atgaacttaaaaacactaggaagttatacttggcgcattatcaaattcattttactaggtttgtgcttgatcttaccccaacaagtttttgccttgccttatattcttccccaaaactttagtccgttagcgacaaacattttaatgtggggcttacttttattgggatatgcactaatgatcgttatttttagctaccaattcaaaaaaggtcagccaacccctaataagatctttcaaaaactatctaaccaagatatcaatgctatcatcacaggttttatcgttttgtttatcatcaagatcatctatgtaatgctcacgagtcaagccggacaaacccaaaacgaccaggccttacaacaaatgtttaaactctcgaccaatgccgctctcatg…	MNLKTLGSYTWRIIKFILLGLCLILPQQVFALPYILPQNFSPLATNILMWGLLLLGYALMIVIFSYQFKKGQPTPNKIFQKLSNQDINAIITGFIVLFIIKIIYVMLTSQAGQTQNDQALQQMFKLSTNAALMMFLMTAIFAPLCEELLFRGIFMRYFFPKNTVLAIFFSGLVFGALHFHLGDIFWTLLLYCALGWVLAYYYKKTNKLLVSILIHFLNNILPALFMLFSVLFTK	hypothetical protein
NODE_16_length_25915_cov_95.842632	fig|1578.617.peg.436	6555	5818	-	Glycerol uptake facilitator protein		atggagttcgcattaaactcaagattgatggccgaatttttcggaacagccctcatgatcatgttgggtaacggttcggtggccaacgttgaattgaaaggaactaagggttaccacagtggttggatcgttatctcgatcggttacggttttgccgtaatgatcccagctttgatgtttggaaagatctcaggtaaccatatcaaccctgcatttactttaggattagccatcgcaggcgatttcccatggcatgaagtcttaccttacataagtatgcaattcttaggcgcaattgctggacaattagtcgtattagcttgtttcaagccacactacgatatcaccgaagatccagaagcagttttggcgaccttctcaacgatcgatgcaactgaa…	MEFALNSRLMAEFFGTALMIMLGNGSVANVELKGTKGYHSGWIVISIGYGFAVMIPALMFGKISGNHINPAFTLGLAIAGDFPWHEVLPYISMQFLGAIAGQLVVLACFKPHYDITEDPEAVLATFSTIDATESRFNGFVNEFFGTFTLVFSALAITHSPIFNFGNQGAGFIGIGLLVMVIVTSFGGPTGPALNPARDLGPRIVHALFPLKHKGSSQWRYAWIPVVAPFVAGACATLLYKAIFGL	Glycerol uptake facilitator protein
NODE_16_length_25915_cov_95.842632	fig|1578.617.peg.437	6777	7241	+	CBS domain protein		atgatatcaaaagcagttttacaattgctaaatcagcgtaaagaaaaatttttgatcccagctgagatcgtagctaatgttcaagagaacaatagtcttgaacatgcatttttagttttaagtaaggtcaagtacgccaagatacctgtattagaccaagatcaacattttaagggactactgtcattggcgatgatcacggagacgatgttaggcttgactgggatcgatcctacacgtttgggacggatccaggtcaaggatgtgatgcagacagatgttccaacgatctgtcctccatatgatatggaagagatcttgcatcttttagtcgatcagactttccttgcagttgtcgatgaaaatggagtctttaccgggatcttgacccgccgtgaa…	MISKAVLQLLNQRKEKFLIPAEIVANVQENNSLEHAFLVLSKVKYAKIPVLDQDQHFKGLLSLAMITETMLGLTGIDPTRLGRIQVKDVMQTDVPTICPPYDMEEILHLLVDQTFLAVVDENGVFTGILTRREVMKAVNYLAHDLEKEYTVEKK	CBS domain protein
NODE_16_length_25915_cov_95.842632	fig|1578.617.peg.438	8197	7286	-	Potassium efflux system KefA protein / Small-conductance mechanosensitive channel		ttgtatctattagctacaacggataagacgctctcatccgacgtttcaaaacaagtagtcaaacaaacgagcgtcttagacaattacataaaaaatatcaattgggacaacattatcactaaggtcatcatggtgactatctcacttattttgatctctttactcttcttgatcattcattctgttggaaaaaaaatcatcacccgcagttttgccaccgccaagaaaaaagatgctaattactctatcgggcgtttgggaacgatctatactttgacccaaaacatctttcattactgtgttttgttcttttacttttacgccatcctttcgatcttaggtatccctgttagtaccttactagcttcggccgggatcgtcagtgttgcgcttggttta…	MYLLATTDKTLSSDVSKQVVKQTSVLDNYIKNINWDNIITKVIMVTISLILISLLFLIIHSVGKKIITRSFATAKKKDANYSIGRLGTIYTLTQNIFHYCVLFFYFYAILSILGIPVSTLLASAGIVSVALGLGAQGFVTDIVTGFFILLEQQFSVGDVVKINTITGKIHAVGLRTTQVISDDGTLNFIPNRSITVVSNMSRNNMQAVIDIRLDPKKDAGEMKKIIAQVNQKIVPDLPEIVTGPTILGVVPLTNGELVFRVTAYTKNGAQATVQRILLDNYLRALKDAGFNIPTSPLNLGATA	Potassium efflux system KefA protein / Small-conductance mechanosensitive channel
NODE_16_length_25915_cov_95.842632	fig|1578.617.peg.439	8365	8781	+	Pyridoxamine 5'-phosphate oxidase (EC 1.4.3.5)	1.4.3.5	atgacaataacgtttggacagattgctgggttaattgcagcgttagcatttttgatcttagttgttttcatttgtacagtgctaaagcatttagtgacgactgttaaagagatgaataacagcattcagatcttgactaaggatgctaacagtattgctggcaatgtggatgagcttttagtaaagactaatgttttgatggaagacgtcaatcacaaagtaagtgaattagatcccttgtttaaaaccgcagccgaactaagtgaaagcgtatctgatttgaacgtagcaagtcgttcaatggctgataaggtagtacggtcaactgaaagtgtggctaaaacaagtgctgcattgcgcgtcggtaagatggcacttggtttttaccaacgacacaaa…	MTITFGQIAGLIAALAFLILVVFICTVLKHLVTTVKEMNNSIQILTKDANSIAGNVDELLVKTNVLMEDVNHKVSELDPLFKTAAELSESVSDLNVASRSMADKVVRSTESVAKTSAALRVGKMALGFYQRHKQKQSK	Pyridoxamine 5'-phosphate oxidase
NODE_16_length_25915_cov_95.842632	fig|1578.617.peg.440	8802	9275	+	hypothetical protein		atgagtaagaaattgttagttggtcttggaatgcttgcagctggtgcaagtgcagctttggtcgcttcaaagaagttgaccgctgaccaaaaagataagttagcgatgaaagtcgatgagaccgtcttgaacggacgtgaaaaagcattgaaatataatcaatacttgcaacaattcttggaagaaaatggtgttgatgacttaaaagaaaaagttgtcagccgagctgatgaattcaagaatgaacaagctgttcaagatgctttggcttcattgaaacaagcaacttctgacttaaaagaacggttggagaacactaaggataagtttgatgatctagctgaagatgaagcttccaaagattggaatgacgatatcgtgatcgatggtcgttctgct…	MSKKLLVGLGMLAAGASAALVASKKLTADQKDKLAMKVDETVLNGREKALKYNQYLQQFLEENGVDDLKEKVVSRADEFKNEQAVQDALASLKQATSDLKERLENTKDKFDDLAEDEASKDWNDDIVIDGRSAFGEAKDKKDQPYEKPTETFYPHND	hypothetical protein
NODE_16_length_25915_cov_95.842632	fig|1578.617.peg.441	10427	9327	-	Proline dipeptidase (EC 3.4.13.9)	3.4.13.9	atgtcacatcttaatactgtccaaacatggttagctgacaataacttggacattgcttatatcagtgattggaaaaacatccaatattttaccggctttggtagcgatccgtttgaacggacactagcactctttatctttccagataaagatcctttcctcttttcacctgcacttgaggtcgaagcgatcaaaaaagcgggctggaaatatcctgtctatggctacttagaccatgaagatccttatgctttgatcaaagaacatatcacagagttagcttcacctaagcattgggctttggaaaaggataacttgactgtggttcgttttgaagctctccgaaaatatttcccccaagccgaattctctgggaatctctcccctgtgatcgaacgt…	MSHLNTVQTWLADNNLDIAYISDWKNIQYFTGFGSDPFERTLALFIFPDKDPFLFSPALEVEAIKKAGWKYPVYGYLDHEDPYALIKEHITELASPKHWALEKDNLTVVRFEALRKYFPQAEFSGNLSPVIEREKLFKTPAEIELLKTAGKWADVAFEAGFKALSTKRTEQDVVAEIEYTMKKNGIMHMSFDTIVQSGANAADPHGAPKADLIKPNELCLFDLGVDYKGYMSDASRTVAFGKVSDKAKEIYQVCLEAQLAAQAAAKPGMRAFELDKIARDIITKAGYGEYFIHRLGHGIGQSDHEFPSIMEGNELVLEPGMCFSIEPGIYVPGVAGVRIEDCVYLTKDGNEPFTHTTKELQIIPLN	Proline dipeptidase
NODE_16_length_25915_cov_95.842632	fig|1578.617.peg.442	10637	11644	+	Catabolite control protein A		atggaaaaacaaacaattacaatctacgatgttgcacgtgaagctgctgtctcaatggctactgtttcacgggtcgttaatggtaacccaaatgttaagcccgcaacacgtaaaaaagtgcttgaagttatcgatcgtttggattatcgtccaaatgcggtcgctcgtggcttggcaagtaaaaagactaccacagtcggggtcatcatccctgatgtgacaaatgtctatttttcttctttagcacgtgggatcgacgatgtagcttcaatgtacaaatataacattattttagctaactccgatggcaatcctcaaaaggaagcacaagttttaaatactttattagccaaacaagttgatgggatcatctttatgggcaataatttgacagacgag…	MEKQTITIYDVAREAAVSMATVSRVVNGNPNVKPATRKKVLEVIDRLDYRPNAVARGLASKKTTTVGVIIPDVTNVYFSSLARGIDDVASMYKYNIILANSDGNPQKEAQVLNTLLAKQVDGIIFMGNNLTDELRAQFARAKTPIVLAGSVDAKNEVESVHVDYVAAVEEAVADLINHGNKRVAFITGPMSDPINGEYRLKGYKNVLAKHGIEYDPDLVFETDYSYRAGEVLWPALASAKATAAFVGDDELACGVLNGAKDAGVKVPAEFEIITSNNSKLTEIVRPQLSSITQPLYDIGAVSMRFLTKMMNKDDMSSAEKTIELPYGYIKRASTK	Catabolite control protein A
NODE_16_length_25915_cov_95.842632	fig|1578.617.peg.443	11699	12211	+	hypothetical protein		atgaaaacaaacaaagtatttaattggcaaaatttatgtttatttggcgcagggttcattgtactcgtcttgtttatcagttcatcaatgccctacactaaacaaacatcagtcccatttttagagcaacatctagcccaaaagccattagaaaactggttgagccaaatttcgttcagatatgctggcaaagagatcagtattgcaaatatcggctattataaatttgtggaattttttatccgcaaaggggctcattttgggacgtattttttattaggcggacttacctctttagggcttgcacactattggcctaagttagggcatgtagcgtttactagttggatgttagcaacgctttatgcagggactgatgagctccatcaaatgtttact…	MKTNKVFNWQNLCLFGAGFIVLVLFISSSMPYTKQTSVPFLEQHLAQKPLENWLSQISFRYAGKEISIANIGYYKFVEFFIRKGAHFGTYFLLGGLTSLGLAHYWPKLGHVAFTSWMLATLYAGTDELHQMFTSDRTPLIQDVILDSCGALLGVMFAMLLLYRSKKRRNG	hypothetical protein
NODE_16_length_25915_cov_95.842632	fig|1578.617.peg.444	12294	13025	+	Probable transcriptional regulatory protein YebC		atgtcaggacattcaaaatggcataacatccaagggcgtaaaaatgctcaagatgcaaaacgtggaaaaattttccaaaaaatctcgcgagatctatacatggctgcaaagagtggcggtcctgacccagacgccaacccacaattgcgccttgtaatggaaaaagcacgtgctgctaacatgccaaaagataatatcaaacgtgcccttgataaagctactggtgcaaatggtgctaactacgaagagatcacttatgaaggttatggtccagctggagtggctatcttagttcatgctttgacagataaccgtaaccggactgcttcagctgtgcggactgacttcaaccgtaacggcggtaacttaggtgaaaccggttctgttagtttcatgttt…	MSGHSKWHNIQGRKNAQDAKRGKIFQKISRDLYMAAKSGGPDPDANPQLRLVMEKARAANMPKDNIKRALDKATGANGANYEEITYEGYGPAGVAILVHALTDNRNRTASAVRTDFNRNGGNLGETGSVSFMFDRKGYIAIVREDLDVDEDQMFEDVIEAGAEDLQTSDEVFEIYTEPKIFEDVRDALQAKYDLDSAEITMVPQNTVPVPEDKVEQLQRLIDRLEDEDDVSEVFTSAEFPDED	Probable transcriptional regulatory protein YebC
NODE_16_length_25915_cov_95.842632	fig|1578.617.peg.445	13192	14118	+	Ribokinase (EC 2.7.1.15)	2.7.1.15	atggtcaatagagtaacagttttaggcagcttgaacgtcgataatatcatgcaagtcaagcgtctgccgttgcccggtgaaacaatgacgatgtcagctaaaaaaattgcaggaggaggcaagggggctaaccaagcgatcgcagctgctcgttctggtgcccaaaccgcctttatcggtaaagtaggagctgacgaacaggggcgtttgatgaaaggttacctcgaagatgcaaagatcgatgcaactagtgtaacgttagcaactgaagaaactggccaagcatttattttattacaagaaaacggtgaaaatagtattctcgtcttgggcggggctaaccaagcgatcactgatgatgatattgaagctgccaaagaaaagatcacgacggcagac…	MVNRVTVLGSLNVDNIMQVKRLPLPGETMTMSAKKIAGGGKGANQAIAAARSGAQTAFIGKVGADEQGRLMKGYLEDAKIDATSVTLATEETGQAFILLQENGENSILVLGGANQAITDDDIEAAKEKITTADFLITQFETPIEASITAFKYAKENDVVTILNPAPAKRVPEALLKNVDLIVLNETETELLTGIKIDAEESWYQAAAKLAKMGVKNTIITLGSKGAYYKTTTAEGFIKAFKVATLDTTAAGDTFLGALSSQLDKALSNIEEAIVFASMASALAVQKFGAIPSIPQLNEVNDALGEANF	Ribokinase
NODE_16_length_25915_cov_95.842632	fig|1578.617.peg.446	14227	15201	+	Late competence protein ComGA, access of DNA to ComEA		atggaactagcaacgaaactattaacggatgcggtagctgtatcggctttagatattttacttttgccgacaaaaacatgttatcaagttaagtattttatccgtgatcattatcttgttcaaagcgaattgacttttgaacaagctcaaaaactattagccttttttaagtttaaagcggatatgatgttaagtgagcatcggaggccacagttaggtgcgtggcaacaaaagatcggagagcagccgttgtacttgcgtttttcgacggtcggtgattttttaggtcgcgaatcaatggtcattcgtttgatatacccactaaaaagcatcaaatatcattatttagtgccagaacaatgggcgcttttagaacaagtgtgtcaaaaacgggggtta…	MELATKLLTDAVAVSALDILLLPTKTCYQVKYFIRDHYLVQSELTFEQAQKLLAFFKFKADMMLSEHRRPQLGAWQQKIGEQPLYLRFSTVGDFLGRESMVIRLIYPLKSIKYHYLVPEQWALLEQVCQKRGLVIFAGPMGSGKTTAMYQLAKAQKQQQVMCIEDPIEIREDSFLQVQVNPKAQMDYSTLLKAALRHHPDIFIVGEIRDQKTARAVLTAALSGHLVLSTLHATSAYGVIERLADLGITRSELKSVLQLVSYQRLLPLKSKGQAVLFDIIQQAELFSENVKQENNGMSADWGRYLEQNATKGKITIATAKKFAHG	Late competence protein ComGA, access of DNA to ComEA
NODE_16_length_25915_cov_95.842632	fig|1578.617.peg.447	15194	16195	+	hypothetical protein		atggctaagtggactttgcggcaacaagcaaatttttttgatctattagccgatcttttaacggcaggcttttcactcaaacaagccttgcagagtttaaaggtatttttgcctaaaaatggattagcgacggtgatcgccgagctagaaacaggtcaaagtttcagtcaggcattaagatctaaggtgacaactaatatttactgtcaacttgtgatcgctgaaaaacatggcagtgtagatcaaagtgtttttcagttaggaaagtatctaaaaaaacgtgtgcagcaacgtgaaaagttacagtcattattgttatatccagcgatcattttaggcttattattatttttgatgatcgccttgaagatctggttggcacctgagatcgcacaattt…	MAKWTLRQQANFFDLLADLLTAGFSLKQALQSLKVFLPKNGLATVIAELETGQSFSQALRSKVTTNIYCQLVIAEKHGSVDQSVFQLGKYLKKRVQQREKLQSLLLYPAIILGLLLFLMIALKIWLAPEIAQFSVSTTGKDPFSYLIFVKFGGLVLLSLFILGVIHFFYWWKKQSIFGRHSWYSSLPIVGSLYRQYNCYYLTFNLGLLIESGLEFQQICGLLEHFEEKSLLYHLGRAFSERLARGEKLTQIMEHYPFIPPELALFFQKGRSKEEIGKDLLAYSKLAYQKLLEKSDHLLAWVQPLLFMVIAIVIICTYLALLLPLYSSLGGLYK	hypothetical protein
NODE_16_length_25915_cov_95.842632	fig|1578.617.peg.448	16192	16494	+	hypothetical protein		atgaaaaaaactaagatgaaagcgtttacattagtggaaatggcaattgttatctttatcatcagtttgttgatcttgatcatcatgcctaacgttgctaaacaacgttccaatgctgaaaaggtcaatactcaagctttgcaagctgagttagatactcaagctcaactatatgccgatgaaaaaggaactgagatggaaaatgttgctccaacggatcttgaaaaagctggatatttgacagctaaacaagtagctgccattgaaaagcatcatcttaaagttgaaaagaatgagcaatga	MKKTKMKAFTLVEMAIVIFIISLLILIIMPNVAKQRSNAEKVNTQALQAELDTQAQLYADEKGTEMENVAPTDLEKAGYLTAKQVAAIEKHHLKVEKNEQ	hypothetical protein
NODE_16_length_25915_cov_95.842632	fig|1578.617.peg.449	16497	16931	+	hypothetical protein		atgaaagttcgaggttttacgcttgttgaagtgactgtgaccctttttattgcaacttgcatatttttattggggatcggtctaggaacacataccttagctagtttacaagaaaagttgttctttaatgaattgcgtcaaacctggtttgcaacgatctatcaaggggagcaacaaaagcaatatacgtggatccagtttgagccaaaacaggtcaagtttagtgtcggacaaaagaccctaaaaattctggtatatccaaaatcgttgacaccaacgactgaatatcaagagttatcagtgagtggtctaggatcacttactcctacgacagaaacatttacttcaactttaggtaaagagtatcgcgtgcattttcaattaggatatggcacacaa…	MKVRGFTLVEVTVTLFIATCIFLLGIGLGTHTLASLQEKLFFNELRQTWFATIYQGEQQKQYTWIQFEPKQVKFSVGQKTLKILVYPKSLTPTTEYQELSVSGLGSLTPTTETFTSTLGKEYRVHFQLGYGTQYRVEENMVKGR	hypothetical protein
NODE_16_length_25915_cov_95.842632	fig|1578.617.peg.450	16936	17190	+	hypothetical protein		gtgcatgtacaggcttttttgttggctgatgcactgagcgggatgagtgtgttattaattattagtacgttattgtacttgacagatctacggttgcatcaagcgacaacacaagcttatcaacaagttcaagtagctcaaaagttactagtgcagagtcagttacaaacaactaaagctaaagggggaaaaattgaagttcagatcacagatcgagctgggcataaaattacaattgagttgcgcaaagattaa	MHVQAFLLADALSGMSVLLIISTLLYLTDLRLHQATTQAYQQVQVAQKLLVQSQLQTTKAKGGKIEVQITDRAGHKITIELRKD	hypothetical protein
NODE_16_length_25915_cov_95.842632	fig|1578.617.peg.451	17225	17629	+	hypothetical protein		atggtgacagctttggggctagcgctattagcagggatcggctcgaatatgcaaaaacaagtggtagctaaacaggagactgatcagtttgaatgggaacgttttgttagtttactacaaaatgagcgccaacatttcgccttagtaaaaaagtcaggtgaaaatggggaaaatatctatttatatagtcgcaaagctaaaaaagattatatcgttcattatgaaagccaacgtgacaaagtgatcatggagaccgcttctggtggttatatgccgttattatatcgagtatctagttttagtgcagttagacaaggtgaaacgataaaaataaccgcccagatcgatctcaggacttatcagacgaccgtgagtttaccgctacagaaagaaagtgga…	MVTALGLALLAGIGSNMQKQVVAKQETDQFEWERFVSLLQNERQHFALVKKSGENGENIYLYSRKAKKDYIVHYESQRDKVIMETASGGYMPLLYRVSSFSAVRQGETIKITAQIDLRTYQTTVSLPLQKESGL	hypothetical protein
NODE_16_length_25915_cov_95.842632	fig|1578.617.peg.452	17626	17907	+	hypothetical protein		atgaaattgaaaggaactctactgagttcggcgctattaatgttagttttggtgacagctgttttttacgcgcaattgttaggacatcagcttcagcaggcgacatatcaacgacaaagcatgtattatcgtgctcgtaccttagctgtattagcccaaaaacttgacttaaagcctggacaaaaagcaagttcagctcaaggacaagtggaaatgttaaaagatcaagtcaaagtgtttcttccaaatggccaaaaatatacccttgatcagatcaactag	MKLKGTLLSSALLMLVLVTAVFYAQLLGHQLQQATYQRQSMYYRARTLAVLAQKLDLKPGQKASSAQGQVEMLKDQVKVFLPNGQKYTLDQIN	hypothetical protein
NODE_16_length_25915_cov_95.842632	fig|1578.617.peg.453	17982	18992	+	Adenine-specific methyltransferase (EC 2.1.1.72)	2.1.1.72	atggcattagcaaaagtagaagaaaaatttcaattattgaatgaagcgatcgagctcttgcaagaaaatgtaaaatgttcagcgttagatgctttgatcgaaacgtttgaaaatttattggataatggtcgagttcatgttgaagatggggcaccagatgaagcaacagtcgctaaattaaaagatctttatcaaaagatcgacttagcttctttatctaaagaagaacggcgctcagtattgcaattgtgccttttacaagcttataagcgcgaaaaagttcaagcaaatcaccaaatgacaccagatacgatcggatttttattggcatatctgatcgaaaaagttggaaaatatacagctggcctaaaactattagatctgacggttgggacaggg…	MALAKVEEKFQLLNEAIELLQENVKCSALDALIETFENLLDNGRVHVEDGAPDEATVAKLKDLYQKIDLASLSKEERRSVLQLCLLQAYKREKVQANHQMTPDTIGFLLAYLIEKVGKYTAGLKLLDLTVGTGNLLSAILSTLKKSGWKELDVYGVDNDDTMLALANISAELMQSKTQLVHQDVLAELQVPPADIVVADLPIGYYPLDSRVREYQTAFAEGHSYVHYLLIEQALEQLVAGGWGVFVVPRGMFEAPEAKQLLQVIQAKGYLQGLLNLPQQLFINENSQKSILLLQKKGPHAKQAEPILLGEFPLMKNQLEFVKFMQEIDSWQAQNFA	Adenine-specific methyltransferase
NODE_16_length_25915_cov_95.842632	fig|1578.617.peg.454	19147	20520	+	D-serine/D-alanine/glycine transporter		atggaaaatgaagagcaatatgcccgtggcttaaagagccggcatgtccaattgatcgcattaggtggaacgatcgggaccgggctatttttaggttcaggaaaatcgatccagttagcaggaccttcgatcgtcttagcatatcttataacaggcgcgatctgtttctttttgatgcgtgcgatgggggaattgctactttcagacttaaagagccattcgtttattgattttattgagcgttatttaggtaaagatattgggtttatcaccggttggacgtattggatttgttggatcacgatcgcgatggctgatgtgacagcaagtgggctgtacatccactattggttcccccatattcctgagtggatccctggtttcatcattttagcgatt…	MENEEQYARGLKSRHVQLIALGGTIGTGLFLGSGKSIQLAGPSIVLAYLITGAICFFLMRAMGELLLSDLKSHSFIDFIERYLGKDIGFITGWTYWICWITIAMADVTASGLYIHYWFPHIPEWIPGFIILAILLALNLITVALFGETEFWFALIKVIAIVALIVIGIVLVVIGYETPSGHASVMNLVDYGGLFPKGLGGFLMSFQMVTFGFIGIEMIGVTASETQDPKTVIPKAINEIPLRIIIFYVGSLLALMCIYPWRSITPDQSPFVQVFENIGIPAAAGIINFVVLTAAASACNSSIFNTGRMVFSLTYKEKGRFAKKMSKLSRHQVPANAIRFSTAVIALTVVANLVIPNTSLFTFISSVATTCFLFIWGAIVVAHLKYRKELKAKGQKNESN…	D-serine/D-alanine/glycine transporter
NODE_16_length_25915_cov_95.842632	fig|1578.617.peg.455	20870	21451	+	Hypothetical DUF1027 domain protein		ttgaatagtgagaaaaaggaacgcagagaagcgcagttggccaagaaagctgagacgatcaaagcttttgcaagtgaagtcgttttgcaaagccctacccaaatgctgatcgatgggcgaccatatattttagagaagaattatcgtaatgggtttgaggtcaaaaaactagaggaacgttttagcaatattttgaccaagtatgattacattgtcggtgattggggttatgagcaattgcggttgcggggcttttatgctgcaggtagtaataaaggaacaccaacgcaaagtattgaacgtttgcaagattatctttacgaatattgtaattttggctgtgcttattttgtcttgcgcaatttagatgttcagcctccgacaccatcgcataatggt…	MNSEKKERREAQLAKKAETIKAFASEVVLQSPTQMLIDGRPYILEKNYRNGFEVKKLEERFSNILTKYDYIVGDWGYEQLRLRGFYAAGSNKGTPTQSIERLQDYLYEYCNFGCAYFVLRNLDVQPPTPSHNGGKNKKTGHKRRTQNRKEKSQKAYTAQRVYDINKKQPRSKKYTTDQVKKRKRRFTIRQKNK	Hypothetical DUF1027 domain protein
NODE_16_length_25915_cov_95.842632	fig|1578.617.peg.456	21468	22238	+	Hypothetical NagD-like phosphatase		atgaaaaaatatgcaggctatatgatcgatcttgatggcacgatctatcgtggtaaggaaaagatcccagctgcgaaacgttttatcgaaaatttgcaggctaaaaatattccatttctctttgtaactaataatagtacacaagcaccagaaaaagttgtggctaatttagcaaagaactttgatattcacgttacagtcgataatgtttttacttcagctttagcgacagcggattatattgctgatttagataatgaaaaaagaacggcttatgtgatcggtgaattaggcttaaaacaagctattttagaccgaggttttaaatttgaagagacaacacctgatcatgtcgttgtaggtctagattatgatgtaacgtatcacaaatttgaatta…	MKKYAGYMIDLDGTIYRGKEKIPAAKRFIENLQAKNIPFLFVTNNSTQAPEKVVANLAKNFDIHVTVDNVFTSALATADYIADLDNEKRTAYVIGELGLKQAILDRGFKFEETTPDHVVVGLDYDVTYHKFELATLAIKRGATFIGTNADTNLPNERGLVPGAGSVIALVECATQQKAQYVGKPETIIMEKALKRLGLAKDQVAMVGDNYMTDIQAGINFGIDTILVYTGVSTKEQVAKKAIKPTVELDSLDQWEV	Hypothetical NagD-like phosphatase
NODE_16_length_25915_cov_95.842632	fig|1578.617.peg.457	22226	22873	+	hypothetical protein		atgggaagtctaaatgttcgatatgtaaaagaggctggggtccaagtcttgttgttgctgtttttagtgacattttgcataacgttaacgatcaatttccatccactctactggtggtttatgcaccactataaactatatcaagaagtagggctgactgaacaagggttacggggaaattatttgtcgttgctagcgtatcttaattatccgtgggtcacagagcttaatttatctttgccgatatcctataatgggatgcggcattttgaagatgtcaaacggctatttttcttgaattacagtgttttagtcctgactgcttggccagcgctacattatttgtatgatctgacactaaaaaaacggctttgggtcttacaaggaaagatatatggt…	MGSLNVRYVKEAGVQVLLLLFLVTFCITLTINFHPLYWWFMHHYKLYQEVGLTEQGLRGNYLSLLAYLNYPWVTELNLSLPISYNGMRHFEDVKRLFFLNYSVLVLTAWPALHYLYDLTLKKRLWVLQGKIYGLSLILAGFICFIVVDFEDFFIVFHEVLFRNDDWIFDPNLDPIINTLPSEYFLACFGIFVGTFTLSLLSIYIVGKWQLKNVVA	hypothetical protein
NODE_16_length_25915_cov_95.842632	fig|1578.617.peg.458	23541	22900	-	DedA protein		atgtcacaactaattgattttatcttacacattgatgtccacttagttacgatcgttaatctcttcggtgattggacatacctgatcttattttcgatcatctttatcgagacaggcgccgttattatgccatttttacccggagattcacttttatttgcagccagtgcgatgtcagccaatcctaaatacagcctagatatttggatctttgtagccatcttctggtttgctgctgttttgggcgactcacttaacttctttatcggtcattatctgggaaaaaaattgaccaagactaaatttttcagtcggatcatcaaagagtcagatctaaaacgaactgaagaattcttcgacaaacacggtggggtcgctatctcattagcccgtttcatg…	MSQLIDFILHIDVHLVTIVNLFGDWTYLILFSIIFIETGAVIMPFLPGDSLLFAASAMSANPKYSLDIWIFVAIFWFAAVLGDSLNFFIGHYLGKKLTKTKFFSRIIKESDLKRTEEFFDKHGGVAISLARFMPIIRTLAPFVYGGSGGNFKTFIRYCLIGATAWVTICCGAGYFFGNFPIVKEHFSLIIIGIIAVSLIPAIIGAIKSKTSKK	DedA protein
NODE_16_length_25915_cov_95.842632	fig|1578.617.peg.459	24696	23689	-	Thioredoxin reductase (EC 1.8.1.9)	1.8.1.9	atggtagctaaagaattttatgatattacgatcatcggcgggggaccagttggaatgtttgctgcgacctatgctcgaatgcgtttagccaaaactcagatcatcgaaattttaggacagttagggggccaagtcagtgccctatttccggctaaaaagatctatgacatccctgcttttccggagatcaccggaacagaattgatcgctcatttaaaacaacaggtcgaaaaattcgagcctgatatctttttaaatgaacgtgtggaaagtttcacccaaatcactggtggctttgagatcaaaacatctaaacgaacaacttattcaaaaacgatcattatcgctactggtgccggagcttttgaaccacgtaaactaaaagtagcagccgctgat…	MVAKEFYDITIIGGGPVGMFAATYARMRLAKTQIIEILGQLGGQVSALFPAKKIYDIPAFPEITGTELIAHLKQQVEKFEPDIFLNERVESFTQITGGFEIKTSKRTTYSKTIIIATGAGAFEPRKLKVAAADRFEDKQLHYFVKDLKAFSNKEVAIAGGGDSAVDWALELASIAKAVHLIHRRDKFRALESSVLALKETKTILHTPYLITDLSSAQDKLCISLEKPRSAEKKELTVDHLLVNYGFASSSKLLESWALELDHHNIAVNAKNETSIPGVYAIGDIAAQADKLNLMATGFGEAPSVINSALLRIYPEKRQPAHSTQLIKKFEAAQDN	Thioredoxin reductase
NODE_16_length_25915_cov_95.842632	fig|1578.617.peg.460	24839	25411	+	Peptidyl-prolyl cis-trans isomerase (EC 5.2.1.8)	5.2.1.8	atggaatttttacaattagacactgataaattgacctcaagtgcggtcatcaaaacaaatttaggtgagatgactttggcacttttccctgagcaggcccctaaagcggttgaaaattttgtgactttagccaaaaacggttattatgatggtgttatctttcaccgagtgatctcagattttatgatccagacgggtgatcctactggaactggaatgggcggtgaaagtatctggggtaaagcttttgaagatgaattttctgatgaactttacaatttacggggcgctgtttcaatggcaaatgctggtcctaatacgaatggaagccaattctttatcgttcagaataaaaatatgcctaagcgtattatcaaacaattgacgacttatcctaag…	MEFLQLDTDKLTSSAVIKTNLGEMTLALFPEQAPKAVENFVTLAKNGYYDGVIFHRVISDFMIQTGDPTGTGMGGESIWGKAFEDEFSDELYNLRGAVSMANAGPNTNGSQFFIVQNKNMPKRIIKQLTTYPKEIVQAYRQGGTPWLDGRHTVFGQVISGMEVVDKIAKAKTSWGDKPKQDIVIENIEIL	Peptidyl-prolyl cis-trans isomerase
NODE_16_length_25915_cov_95.842632	fig|1578.617.peg.461	25424	25816	+	General stress protein 13		atggaaatagcttatcgtatcggaatggtactggaaggatatgtgactgggatccaaccttatggcgcttttgtggcgcttgatgaggagacacagggtttgatccatatttctgagtgccatcacggttttgtagatgatatccaaaactatttaaaagtcgggcaaagagtgcgagtgatgatcattgatatcgatgagtatactcaaaagatctcactttcggtcagatgtttggagaagacctttgattttaaccaaccacggcatacacgttaccaacataagaagtactggactaatcgtcatgtatatgaaggttttagcccaatagctaaaagattggatcattgggtcgatgaagctttggccgacattgcagcaggaaaataa	MEIAYRIGMVLEGYVTGIQPYGAFVALDEETQGLIHISECHHGFVDDIQNYLKVGQRVRVMIIDIDEYTQKISLSVRCLEKTFDFNQPRHTRYQHKKYWTNRHVYEGFSPIAKRLDHWVDEALADIAAGK	General stress protein 13
NODE_170_length_1484_cov_107.868367	fig|1578.617.peg.462	1	846	+	Inosine-5'-monophosphate dehydrogenase (EC 1.1.1.205) / CBS domain	1.1.1.205	gctgctaaagatgaacatggtcgcttgttagttgctgctgctgtgggggtaacaagtgatacatttgaacgggcaactgctttattgaacgctggggctgatgctttagtcattgatacagctcatggacattcagctggtgttatccgcaagatcaaagagatcagagaacatttcccagatgcaactttgatcgccggaaacgtagccacagctgaagcgacacgtgctttgtttgatgtgggtgttgatgtagttaaagttggtatcggaccaggttctatctgtacgactcgtatcgtggctggggtcggtgttccacaattaacagcgatctatgatgctgctagtgtagctcgtgaatatggtaaagcgatcatcgctgacggtgggatcaag…	AAKDEHGRLLVAAAVGVTSDTFERATALLNAGADALVIDTAHGHSAGVIRKIKEIREHFPDATLIAGNVATAEATRALFDVGVDVVKVGIGPGSICTTRIVAGVGVPQLTAIYDAASVAREYGKAIIADGGIKYSGEIVKAIAAGGNAVMLGSMLAGTDEAPGETIIYEGRRFKTYRGMGSLGAMDSTHGSSDRYFQSGVNEANKLVPEGIEGRVAYKGSVADIIYQMDGGLRAGMGYVGAANLKDLNDNAQFVQITGAGLRESHPHDVQITKEAPNYSTR	Inosine-5'-monophosphate dehydrogenase
NODE_170_length_1484_cov_107.868367	fig|1578.617.peg.463	1484	984	-	ABC transporter, ATP-binding protein		cctagcagtggctctgttttgatcaatggtaaagagatcgccacttatagcaacaaagaaagagaacaacttcgcttggagcagatcgggtttgttttacaagctcataatctcgtcccttatttaacgctcaaagaacaatttgaactggtcgatcgggtcaaaaagacaggcaatctaagttcagctgatcttgaacggctattagctcaccttgagatcgctgaacttaaagataaatatcccaatgaactttccggtggtcaaagtcaacgcgccgcgatcgcacgtgctttatatactgatcctgagatcattttagccgatgagccaacagcagcgttagatagtcagcgcgtcaaaaaagttgggacgatcttacaagtcttagccaagcaa…	PSSGSVLINGKEIATYSNKEREQLRLEQIGFVLQAHNLVPYLTLKEQFELVDRVKKTGNLSSADLERLLAHLEIAELKDKYPNELSGGQSQRAAIARALYTDPEIILADEPTAALDSQRVKKVGTILQVLAKQQNKAVITVTHDLRLIEQADKIYELTDGQLVQKK	ABC transporter, ATP-binding protein
NODE_171_length_1404_cov_115.048140	fig|1578.617.peg.464	530	3	-	beta-glucosidase (EC 3.2.1.21)	3.2.1.21	atgtatacatttccaaagaattttatttggggcgccgctacttcagggcctcaatctgaaggcaattttaaaaaacgacatcaaaatgtttttgactattggtatactaaagatccaagtgccttttatgctggtgtcggaccggatacgacgtctaatttttacaatgattatgaaaacgatttaaagttgatgcatcaagcagggatcaaagctttaagaacttcgatccagtggagtcgcttgatcgctgactttgaaacttgcgaagtcgatcaaaaaggtgctgacttttatagtcgtgtgatcgatgctatgttggctaacggtatcacaccgtatatcaatttgtgtcatttcgatatgccagttgaattacagcataaatacggtggcttt…	MYTFPKNFIWGAATSGPQSEGNFKKRHQNVFDYWYTKDPSAFYAGVGPDTTSNFYNDYENDLKLMHQAGIKALRTSIQWSRLIADFETCEVDQKGADFYSRVIDAMLANGITPYINLCHFDMPVELQHKYGGFESKHVTDLFAGFAKKCFELYGDRVDHWFTFNEPKVILDGGYLY	beta-glucosidase
NODE_171_length_1404_cov_115.048140	fig|1578.617.peg.465	1402	533	-	N-acetylmannosamine kinase (EC 2.7.1.60)	2.7.1.60	ttacgtttgttcatattttatatagcaggaacaacgatcaaatttgggctaaacacaggtgagaagttggagctattaccagctaagaaaacacctaagacgttacctgaattttatcagtgcttagaagagacagtaaatgagttaaaaaaacaagtacctatcaaaggtgtagcgctcagttgcccgggggcagtcgatcaaaaaacaggtgtgatcgggggggacagtgctttaccttatattcatggctttgatattagaagtgagctcaaaaagcgctttggcttaccggtcagcatcgaaaatgacgctaattgtgctgccttagctgaaatggcaagtggtgctggcaaaaaggtcaaagatgcgatctttttagtgatcgggaccggtgtc…	LRLFIFYIAGTTIKFGLNTGEKLELLPAKKTPKTLPEFYQCLEETVNELKKQVPIKGVALSCPGAVDQKTGVIGGDSALPYIHGFDIRSELKKRFGLPVSIENDANCAALAEMASGAGKKVKDAIFLVIGTGVGGALVVDKKLHHGAHLLGGEFGYLLLGQEMTVSQIVSPVSIAERYNAKTRQALSGKEVFAKAQTGDKIASVEVDNALQTLALLIYNLQYSFDPELFIIGGAISKNPALISMLEPKLAKLRQKVKAAKLEPKIAVCHYYEQANLLGAAINFKKMMER	N-acetylmannosamine kinase
NODE_172_length_1403_cov_87.540876	fig|1578.617.peg.466	2	556	+	hypothetical protein		gcaacagtcttgacacttggtgtgcgaggatacagtgacaaattaaatggcttggaggctgcattttatagtgtagtgatcgggggcttggctattttgaatggggcagcgctagggcagacaatgtatgataagacagcaaagtataatgttttagggagacttgggagtgcattgggcttatcatctccattaataataagtggtttgatactcgtaatcttttatcgctttcgagttgtaaaatatcctaaggaattcatgatcgtagggaacgatatagagataagtggttcctacttattaagtggggcaataacacttttgtggtttggattgatgctagaaggaataggtatgatggggtacgtacaagcattaataggagggaaaacaggc…	ATVLTLGVRGYSDKLNGLEAAFYSVVIGGLAILNGAALGQTMYDKTAKYNVLGRLGSALGLSSPLIISGLILVIFYRFRVVKYPKEFMIVGNDIEISGSYLLSGAITLLWFGLMLEGIGMMGYVQALIGGKTGFFYASLALIPVVIAIWLITQYRKWMFKYIVWVLRRKGLLQVVDESKSKDID	hypothetical protein
NODE_172_length_1403_cov_87.540876	fig|1578.617.peg.467	592	1170	+	hypothetical protein		atgacaaatgtatttgatttattaggtgttgtggtgttggtcgcgctcgtctattggttgaatttagcagttggcaagagtggtgtggcgggtaaattatccgcaggctttgcattatttcaaacattggtagtttttgcttcagctgtgggatcaatgatcctattgggaaacttagttgaaaatgagacattttcgttgtttttggcggttttgggcctaagtggggtcttaatactgagtggctttatgtcatttaaatattatgaacaacgtattttagctcaccctgaagagttttatattcaagatggtaacgtagtttttgaaaagtcatatctttttggtggtgtagttagttatttaggttttgggaccttagctgctggaatcggttta…	MTNVFDLLGVVVLVALVYWLNLAVGKSGVAGKLSAGFALFQTLVVFASAVGSMILLGNLVENETFSLFLAVLGLSGVLILSGFMSFKYYEQRILAHPEEFYIQDGNVVFEKSYLFGGVVSYLGFGTLAAGIGLTNTISSVIGAHHGVLYGLATLAPIIIAIYLFAKYRKWVMQHIIKELGEQGKLIEKNTGE	hypothetical protein
NODE_172_length_1403_cov_87.540876	fig|1578.617.peg.468	1242	1403	+	hypothetical protein		atgactaagatgaattacatggagctatatggattcatgcttgcaacaaaccaaggcttgaatagtcggcgtgatctattacgtaaaacgcaaaaaagcttaaatgtttttacaagtggcaaaggtggtctcactggtggtgccgctgatgggatcgcaaat	MTKMNYMELYGFMLATNQGLNSRRDLLRKTQKSLNVFTSGKGGLTGGAADGIAN	hypothetical protein
NODE_173_length_1379_cov_693.924963	fig|1578.617.peg.469	1267	155	-	hypothetical protein		atgaaaactatagcttatctcggaatggatgtccacaaagataccttcaacttatgtgcattagatgggacaacaggtgagatcttaggagaaactcgttgcgcttcagatgtaaaattagtaaaaaaattcatcgaaaaaatagctagcaatcacaaaggagaaattcaagtcaaagcaggatatgaggctggatgtttggggtactcgctccacgatcttctcgaaaaacaagggatcgactgtgatattttagcaccaacaacgatgtacagctcttcaaaaaataaggtcgtaaaaaacgatcgtcttgacgccaaaatgatcgcactcaatttggcaaataatacgtataagccagtctacgtccctgacgaagaagatatttgcgttaaagaa…	MKTIAYLGMDVHKDTFNLCALDGTTGEILGETRCASDVKLVKKFIEKIASNHKGEIQVKAGYEAGCLGYSLHDLLEKQGIDCDILAPTTMYSSSKNKVVKNDRLDAKMIALNLANNTYKPVYVPDEEDICVKEYIRMMKDFKTSLKKIKQQVKAFLLRHGLVYDGKSSWTLAHLKWLKGLKLTGLLKETLEEYLLQYDVLTDKIERFSQRIEELSHERRYKKPVAQLRCLKGVDTTTAMMIHVEISDFTRFPNAKAFTAYLGLTPSEHSSGEKIYRNGITKQGNTTVRSTLVECANALVKGTIGIKSKRVKARQKGQASKVIAYADKATERLQRKYHRMMYQGKPRNVAITAIARELACFIWGIETKQID	hypothetical protein
NODE_174_length_1363_cov_88.960902	fig|1578.617.peg.470	3	68	+	hypothetical protein		aaagtagctaaaaatatccaagaagatgacatcaaagcaagtaaggaactgtttaaacatgattga	KVAKNIQEDDIKASKELFKHD	hypothetical protein
NODE_174_length_1363_cov_88.960902	fig|1578.617.peg.471	334	642	+	LSU ribosomal protein L21p		atgtacgcaattattgaaacaggtggtaagcaacttaaagtagaagctggtcaagctatctacgttgaaaagttggctgctgaagctggtgaaaaagtaacttttgataaagttgttttagtaggcggcgaaaacacagtgatcggtacaccttttgttgaaggtgctactgttgaaggtactgttgaaaagcaaggtcgtgctaagaaagttgttactttcaagtacaagcctaagaagcatcaacacacaaagcaaggtcatcgtcaaccatacacaaaggttgttatcgacgcgatcaacgcataa	MYAIIETGGKQLKVEAGQAIYVEKLAAEAGEKVTFDKVVLVGGENTVIGTPFVEGATVEGTVEKQGRAKKVVTFKYKPKKHQHTKQGHRQPYTKVVIDAINA	LSU ribosomal protein L21p
NODE_174_length_1363_cov_88.960902	fig|1578.617.peg.472	664	990	+	FIG139598: Potential ribosomal protein		atgatccatgcaaatattattagaaatggtaaagtgatcgaaggtttcgacattactggtcatgcaggttttgcaaaagctggtgaggatattgtttgtgcggctgtttcgatgttagcgatcaatacgatcaatacgttggaaaagttgctgaaacaaaaatttgaactagttgaagatcagaaaaatggtgggcttttgcaagtagctttatcagatgagggacaaaatgatcccgcagttcaattgatcttatcgagccttgaattaggtttgagagatgttgaacagagttatccaaaatatataaaaacgaatataaattaa	MIHANIIRNGKVIEGFDITGHAGFAKAGEDIVCAAVSMLAINTINTLEKLLKQKFELVEDQKNGGLLQVALSDEGQNDPAVQLILSSLELGLRDVEQSYPKYIKTNIN	FIG139598: Potential ribosomal protein
NODE_174_length_1363_cov_88.960902	fig|1578.617.peg.473	1013	1294	+	LSU ribosomal protein L27p		atgttaatgaacttacaatacttcgctcataaaaagggtggtggttccacttctaacggtcgtgactcacgttctaagcgtttaggtgctaagagtgctgacggtcaaacagttaacggtggtgctatcttataccgtcaacgtggtacacgtatttacccaggtgttaacgttggtatgggtggcgacaacacattatttgctaaggttgctggtgtcgttaaatttgaacgtaaaggccgcgataagaagcaagttagtgtttacccagttgctgaataa	MLMNLQYFAHKKGGGSTSNGRDSRSKRLGAKSADGQTVNGGAILYRQRGTRIYPGVNVGMGGDNTLFAKVAGVVKFERKGRDKKQVSVYPVAE	LSU ribosomal protein L27p
NODE_175_length_1352_cov_96.968916	fig|1578.617.peg.474	1	204	+	Putative pheromone cAM373 precursor lipoprotein CamS		ctacatgttaagatcacgactcaattttacagtgaaactgagatcagaagctttacacagtttgtctctcagatggcaaagacttacttgccaggtgatattccgatcgatatcacgatcaaaggctcagatggggaagttcaagcctttctagctcgtgaaaaagatagtgggagcttttatacccatgtctttgatgattag	LHVKITTQFYSETEIRSFTQFVSQMAKTYLPGDIPIDITIKGSDGEVQAFLAREKDSGSFYTHVFDD	Putative pheromone cAM373 precursor lipoprotein CamS
NODE_175_length_1352_cov_96.968916	fig|1578.617.peg.475	280	582	+	Aspartyl-tRNA(Asn) amidotransferase subunit C (EC 6.3.5.6) @ Glutamyl-tRNA(Gln) amidotransferase subunit C (EC 6.3.5.7)		atggcgatcagcgcaaatgaagtaaagcacgttgcaagtttggcaaagcttgaatttagcgatgcgaaattacaaaaattcaccggtcaaatggaccagatcatcaatatggtacaacaactaagtgaagtcgatacgacagatgtgccggtaacgacaactgtgacggatgcctttaatgtaatgcgagaagatattgcagttaaggggaccgatcgtgaattgttgatggaaaatgtacctgaaagaaaagatggctttatcaaagtgccagcgattattgatgaaagtgaggaaggctag	MAISANEVKHVASLAKLEFSDAKLQKFTGQMDQIINMVQQLSEVDTTDVPVTTTVTDAFNVMREDIAVKGTDRELLMENVPERKDGFIKVPAIIDESEEG	Aspartyl-tRNA Asn amidotransferase subunit C
NODE_175_length_1352_cov_96.968916	fig|1578.617.peg.476	586	1350	+	Aspartyl-tRNA(Asn) amidotransferase subunit A (EC 6.3.5.6) @ Glutamyl-tRNA(Gln) amidotransferase subunit A (EC 6.3.5.7)		atggattattttacaactgatctgaccagtttacatgaaaaattggtcaacaaagatttgagcgtagaggagttgacaaaagagactttcaagacgatcaaagaccgtgatcaacagatcgctgctttcctagctttaaatgaagaagctgctttaaagcaagctaaagaacttgaccaaaatgggatcgatccagctaatgttttagccgggatcccgatcgcgatcaaagataatatcgtgacaaaaggcttgcggaccacggctgccagcaagatgttagaaaactttgacccgatctatgatgcaacagttatggaaaaattagctgctgctcaaatgatcaatgtgggtaaagtcaacatggatgaatttgctatggggggctcgactgaaagc…	MDYFTTDLTSLHEKLVNKDLSVEELTKETFKTIKDRDQQIAAFLALNEEAALKQAKELDQNGIDPANVLAGIPIAIKDNIVTKGLRTTAASKMLENFDPIYDATVMEKLAAAQMINVGKVNMDEFAMGGSTESSAFKITKNAWDQTKVPGGSSGGSAAAVASGQVLAALGSDTGGSIRQPAAYNGIVGVKPTYGRVSRYGLIAFASSLDQIGPLTRTVKDNAYVLNAISGRDSRDFTSSDREVPDFTQGLDGDIK	Aspartyl-tRNA Asn amidotransferase subunit A
NODE_176_length_1344_cov_94.445461	fig|1578.617.peg.477	183	602	+	hypothetical protein		ttgtttttggcatatctagtttttgatatgaaagataatattttgatctatccagtcatagttactgaatgcaatgacgaggcagggcattattatggtgtaacatcgcctaatatacaaggtatggtaactgatggaaaaacattaactgaagctatagagcatgcagaagatgctattgcaactatgatctctgataccgaatatcctgcggtacaagatccacgcagttgggaattggaagaaaatgatagcattatgtgggtaacggtaaatatgcgtagatggctcaatgactatggcaagacagttcgacgtaatgtgacaattccagagagcttaaatgaatgggccaagctaaataatgtcaacgtatcaaaggttacgactgaagcttta…	MFLAYLVFDMKDNILIYPVIVTECNDEAGHYYGVTSPNIQGMVTDGKTLTEAIEHAEDAIATMISDTEYPAVQDPRSWELEENDSIMWVTVNMRRWLNDYGKTVRRNVTIPESLNEWAKLNNVNVSKVTTEALKELANI	hypothetical protein
NODE_176_length_1344_cov_94.445461	fig|1578.617.peg.478	959	1204	+	hypothetical protein		gtgactctaactaagaatgaacgactaaaatacataactttttatggtaaaaacgggcagagattaaaacaaatagatttgtttagcccggcacatactgtagatggcaaaaaagttgcaacaccacatacgcatttggggtatttacatttggagggtggtaccagagaacgtatgactgttgctgaaagtaaacttattgaaaaagtgctcaatatgtgggaaaatcatatgggaaagttatag	MTLTKNERLKYITFYGKNGQRLKQIDLFSPAHTVDGKKVATPHTHLGYLHLEGGTRERMTVAESKLIEKVLNMWENHMGKL	hypothetical protein
NODE_177_length_1341_cov_636.177370	fig|1578.617.rna.5	1250	1	-	SSU rRNA # 16S rRNA, small subunit ribosomal RNA - 3 prime truncation		agtcacaaactttaaattgagagtttgatcctggctcaggatgaacgctggcggcgtgcctaatacatgcaagtcgaacgaaacttctttatcaccgagtgcttgcactcaccgataaagagttgagtggcgaacgggtgagtaacacgtgggcaacctgcccaaaagagggggataacacttggaaacaggtgctaataccgcataaccatagttaccgcatggtaactatgtaaaaggtggctatgctaccgcttttggatgggcccgcggcgcattagctagttggtggggtaaaggcttaccaaggcaatgatgcgtagccgaactgagaggttgatcggccacattgggactgagacacggcccaaactcctacgggaggcagcagtagggaat…		SSU rRNA # 16S rRNA, small subunit ribosomal RNA - 3 prime truncation
NODE_178_length_1332_cov_637.651270	fig|1578.617.peg.479	491	3	-	Mobile element protein		atgttaaaagtctctcgttctggctattatcgctacttaagtgcgcctaaatcaaatcgatgcttagaaaatgaatggctaagtgagataatcaaaaaggaatttcatgctttaaagggcatatacggggctcggcgcatcaaaatattgatcgagcgaaaatacggtaaacgttataatctaaaacgcattaaacgtttaatgcgcaaattaggcataacttcatcgatcagaagaaaacgcaaaggttgtactaaatcgggttattcaaactatgaagaaaatgtcttaggccgagattttacggcgaaagctcctaatgaaaaatgggtgactgatgtaacttatttagaatacggttcgggtcaaaaggcttacttaagtgcagtaaaagacctg…	MLKVSRSGYYRYLSAPKSNRCLENEWLSEIIKKEFHALKGIYGARRIKILIERKYGKRYNLKRIKRLMRKLGITSSIRRKRKGCTKSGYSNYEENVLGRDFTAKAPNEKWVTDVTYLEYGSGQKAYLSAVKDLYDGYIVSFEIGKRNDNRLVMRTLEKAFKTL	Mobile element protein
NODE_178_length_1332_cov_637.651270	fig|1578.617.peg.480	1264	578	-	Mobile element protein		atgtctaaaagaactactaaacacactattgaagagcggtatgctgctgttactaagtatcttagtgggctatattccagaataactattagtaaagaatatggtatcgatgaaaatactttagcgaactggatacgaaaatataaggctaatgggattgatggcttaaaagagtctcgaacgtggaaaagatatcccgctgatctgaaactaaatgctgtcctagactatttggaaaatggttattctttacgcaaatgttgtgataaatataatatttcaagtcgtgaagttttacgccaatggattagattgtatactagtgctaaaagctttaaaaccactggaggacatacaaacatgaaacatggccgtaaaactacctttaaagaacgcttg…	MSKRTTKHTIEERYAAVTKYLSGLYSRITISKEYGIDENTLANWIRKYKANGIDGLKESRTWKRYPADLKLNAVLDYLENGYSLRKCCDKYNISSREVLRQWIRLYTSAKSFKTTGGHTNMKHGRKTTFKERLEIVQYTLAHDKDYQKAIDKYKISYSQVYSWVRKFEKDGEAALQDKRGKTVKDREFETLSETERLKLEILRLKERNEYLETENIILKKLDEIERRR	Mobile element protein
NODE_179_length_1250_cov_10.741167	fig|1578.617.peg.481	1	177	+	hypothetical protein		aattttaacagtagctatattgtggctgtcttagctggcgtcatgctagcgggcttcttaccacacgaagaatgggtcgttggttggtctggcattttagcactgatcattacagcagttgcaagtgcacgagatgcagaatggacgcgtggcttggattggctgttcagaccataa	NFNSSYIVAVLAGVMLAGFLPHEEWVVGWSGILALIITAVASARDAEWTRGLDWLFRP	hypothetical protein
NODE_179_length_1250_cov_10.741167	fig|1578.617.peg.482	258	566	+	hypothetical protein		atgaatgaattagaaaaaatgttattagcggctatcttaaagcaaggagtcaaagaagaagacactaataaagagcagaaaaaagaagcagttaaacaagcaggggaagttttgaagaaagcaaacttagattttgcagtgcttgctttaagtgcaaatactgattacgtagctactaacgtggaagcatcatcgcttgacttgtttgtaatgcttaatgagttgtttgaagcaatacataaaagtgatctcgaatgcattaaatctattgtatgtgcagagatcaatgctagggataaggaggactaa	MNELEKMLLAAILKQGVKEEDTNKEQKKEAVKQAGEVLKKANLDFAVLALSANTDYVATNVEASSLDLFVMLNELFEAIHKSDLECIKSIVCAEINARDKED	hypothetical protein
NODE_179_length_1250_cov_10.741167	fig|1578.617.peg.483	570	1250	+	hypothetical protein		atgaacgagttaacaacattagagcgagttgacattgattacacaccagcagttttaacgatccaaaataaagatgttttggatcaagcagtagatgagttcatcagcaagtatgaaaacatcgttgttactgaagaaaccttaaaagatgcaaaaaattcaaaggcacaagtaaatgctttgaagaaggcacttgatgacaagcgcaaagaacaaaagcgcatttataacaagccacttaacgcttttgagaatgaaatcaaggcatacattgaaaagctaaataatgtgtatcaatcaatcaacgatggcgttaaattctttgaggataagcaacgtgatgaacgcaagcaaaatgttcaagcaatgatcacagaagtcgctgaagctaatgctgtc…	MNELTTLERVDIDYTPAVLTIQNKDVLDQAVDEFISKYENIVVTEETLKDAKNSKAQVNALKKALDDKRKEQKRIYNKPLNAFENEIKAYIEKLNNVYQSINDGVKFFEDKQRDERKQNVQAMITEVAEANAVDPETVEIQKQWLLKSATKGKIMEEIVEAVQKQKRINKDVEMITEYCAKLDLPKTRYVEIARDFDYWEAKKAADSDHEELLQRKEAERLAKQALV	hypothetical protein
NODE_17_length_25813_cov_86.521451	fig|1578.617.peg.484	1051	173	-	N-acetylmuramoyl-L-alanine amidase (EC 3.5.1.28)	3.5.1.28	atggaaaagcctagaacttctcatggatctggcctccccaaacgtattcgggtcctatttgcgatcattttcgtactagttggtattttaggttatcgcacttataaatatttcggacaactagagatccaaactaactatgctgtccttaaaaacggccctggtgttgaatatgatcaaatcagtcaactcaagcaaaaccaacgtgtaactgtcttgaaaagcaaatatcattggatgtatgttgaaactgacgatgaaaaaaaaggctggatcgctgattggatgatcaacagtagctacaaattacctgttaccgatctctcaaatgcgacgatcgtgatcgatcctggtcacggtggttatgattctggggcgacctcgaacactgagaaaaaa…	MEKPRTSHGSGLPKRIRVLFAIIFVLVGILGYRTYKYFGQLEIQTNYAVLKNGPGVEYDQISQLKQNQRVTVLKSKYHWMYVETDDEKKGWIADWMINSSYKLPVTDLSNATIVIDPGHGGYDSGATSNTEKKEEKQYTLAYAKLLAEKLRKQNTKVYLTRSDDTFVSLSKRPALADQVHADAFISFHFDSSPVKNTASGFTTYYYHKNSAKLAQTVNKEFGAIGLENRGVEIGDFLVIRDIKEPAILLEMGYINSDRDFDQISSKSYRATVVNDVYQGLEKYFAAQKDTSK	N-acetylmuramoyl-L-alanine amidase
NODE_17_length_25813_cov_86.521451	fig|1578.617.peg.485	1265	1987	+	Uridine monophosphate kinase (EC 2.7.4.22)	2.7.4.22	atgtctgacattaaatacaaacgagttgtgatgaaactgagcggggaagcattggccggtgatgctggtcaaggtatcaatccgccagagatccgtaaagttgccgaagagatcaaagaagtgcatgacttgggtgttcaaatcgcgatcgttgtcggtggtggcaatatgtggcgtggcgaatcaggtgcacaaatgggaatggagcgcgctcaagcagattatatcggaatgcttgggacagtgatgaatgctttggcactacaagacaatttagaatcgatcggagtaccaactagagttcaaactgcaattgaaatgcgccaagtagctgaaccatatattcgacgtaaagcaatgcggcatttggaaaagggacgtatcgtgatctttgcagcc…	MSDIKYKRVVMKLSGEALAGDAGQGINPPEIRKVAEEIKEVHDLGVQIAIVVGGGNMWRGESGAQMGMERAQADYIGMLGTVMNALALQDNLESIGVPTRVQTAIEMRQVAEPYIRRKAMRHLEKGRIVIFAAGTGSPYFSTDTTSALRASEINADVILMAKNGVDGIYSADPRKDANAVKYDKLTHMEIINKGLQVMDTTASSLSMDNNIPLVVFNMNERGNIKKVVQGETIGTTVEGK	Uridine monophosphate kinase
NODE_17_length_25813_cov_86.521451	fig|1578.617.peg.486	1996	2559	+	Ribosome recycling factor		atgaaaatcacagatccaactattttacaatatcaagaaaaaatgaccaaagcagaagaagctttacaacgtgaattgggtacgatcagagcaggggtagcaaatgctagtttgttaaaccgagtaaacgttgaatattatggggtgccaacaccacttaatcaaatggctcagatcagtgttccagaagcacgtgtgcttctcatcacaccatacgataagtcttctttaaaagacatcgaacatgcgctcttagcatctgatctaggtatcgcacctatgaatgacgggtcagctattcgtttagtgatcccacaattgactgaagaacggcgtaaggaattagctaaacaagttaaagcaacttctgaaaagggcaaagttgctgttagaaacgtt…	MKITDPTILQYQEKMTKAEEALQRELGTIRAGVANASLLNRVNVEYYGVPTPLNQMAQISVPEARVLLITPYDKSSLKDIEHALLASDLGIAPMNDGSAIRLVIPQLTEERRKELAKQVKATSEKGKVAVRNVRREMMDALKKAQKNGDLTEDQLRDLEDVAQKVTDNSIKNIENITAEKEKEVLAG	Ribosome recycling factor
NODE_17_length_25813_cov_86.521451	fig|1578.617.peg.487	2665	3441	+	Undecaprenyl diphosphate synthase (EC 2.5.1.31)	2.5.1.31	atgttttctaacttatttaaaaataagcaggcagcacaaaacaagctagatcaaaaacggataccggctcatgttgcgatcatcatggatggtaatggtagatgggcaaaaaagcgcggcttgccccgagttgccgggcacaagcagggaatggagacggtcaaaacgatcactaaagcagctagtgatctaggggtcaaggtgttgacattatatgctttttcaacggaaaattggaaaaggcctcaagctgaagtcggttttttaatggatcttccagtaaaattttttaatacatttgtcccggatctgatcgcaaacaatgtccgtgtcaatgtgatggggtatacagataaattacctgactcgacaaaaaaagcagtttttgatgcgatcgag…	MFSNLFKNKQAAQNKLDQKRIPAHVAIIMDGNGRWAKKRGLPRVAGHKQGMETVKTITKAASDLGVKVLTLYAFSTENWKRPQAEVGFLMDLPVKFFNTFVPDLIANNVRVNVMGYTDKLPDSTKKAVFDAIEQTKDNTGMVLNFALNYGGRAEITTAVQAVATQVKQGKLEPSQIDEKVFSEALMTAKLPYADPELLIRTSGEERISNFLLWQIAYSELVFTDVLWPDFSAEDLELSIYKFQQRDRRFGGLNKKEDN	Undecaprenyl diphosphate synthase
NODE_17_length_25813_cov_86.521451	fig|1578.617.peg.488	3441	4229	+	Phosphatidate cytidylyltransferase (EC 2.7.7.41)	2.7.7.41	atgaaacagcgtgttataacagcggtgatcgctttgatcattttcttaccattgctttatctaggagggattccctttgatatcttggtaacattgatgggtatcgtcgccatgtcagaatttttgatcatgaaaaagaaattactcgtgtcatttgaggcgatcgtttcttttcttttgatgctatcgatcttattgccggtcttttgggctggtttttggacacaggatactttagggggcagcttttatttgctagccctagtcatgctagtctacactgtgatctctaaaaatcgtttttcatttgatgatgcaggggtcttattattaggtggactatatgcggggcttggttttagattcatgatgctagctcgagcagagagcttatggatg…	MKQRVITAVIALIIFLPLLYLGGIPFDILVTLMGIVAMSEFLIMKKKLLVSFEAIVSFLLMLSILLPVFWAGFWTQDTLGGSFYLLALVMLVYTVISKNRFSFDDAGVLLLGGLYAGLGFRFMMLARAESLWMMLYALLIVWVTDSGAYLIGRKIGKNKLAPHISPNKTWEGSIGGSLSAVVIVGAYLYFVQAAFPYSFSTMLLWTLVFSVGGQLGDLIESAFKRHYGVKDSGKILPGHGGILDRFDSLLFVLPLMHFAGLI	Phosphatidate cytidylyltransferase
NODE_17_length_25813_cov_86.521451	fig|1578.617.peg.489	4263	5537	+	Membrane-associated zinc metalloprotease		atgataacaactataattacatttatcatcatctttgggatcttagtatttgtccatgaatttggacactattattttgccaaacgtgctgggatcttggtccgtgagtttgcgatcgggatgggacctaaactgtttgcatatcgcaagaatggcacgacctatacttggcggatcttaccactgggtggttatgtcagcatggcaggtttggaagatgataccgaagagctaaaaaaagggatgccagtcagtttgatcactgacgaaaatggtgtcgttcaaaagataaatactagtaaaaaactcactttagtcgaagggatcccgctcgaattgactgactgggatctaacggatggactttgggtcgaagggtatgaaaacggcactgaagat…	MITTIITFIIIFGILVFVHEFGHYYFAKRAGILVREFAIGMGPKLFAYRKNGTTYTWRILPLGGYVSMAGLEDDTEELKKGMPVSLITDENGVVQKINTSKKLTLVEGIPLELTDWDLTDGLWVEGYENGTEDEIKRFKVDHDALIIGKDGIELQIAPCDVRFQSASLVDRMLTNFAGPLNNFLLAIVAFGLVAFLQGGVPVTTNTIAQVQTDSVAQKAGLKANDTIIAIDGAKTPTWDDVAQHIRSADGKELVLTVKRADKKQNIKVTPVQKNVNGQKVAQIGIIAKGKMDRSIKAKLTYGFTQTWYVIKQLGNALASMLHGFSLNDLGGPVAMFSLTSQAKENGLISVVTLTALLSVNLGIINLLPIPALDGGKLLLNIIEAIRRKPLDPEKEIIIT…	Membrane-associated zinc metalloprotease
NODE_17_length_25813_cov_86.521451	fig|1578.617.peg.490	5565	7286	+	Prolyl-tRNA synthetase (EC 6.1.1.15), bacterial type	6.1.1.15	atgaaacaatcaaaaatgttgattccaacattaaaagaagtgccaagcgatgctgaagcactcagtcaccagttgatgttacgagctggttatatcaaacaagtaacagccggagtctatgcctacttaccattggcttatcgggtcttaaataatatcgaaacgatcatccgggatgaaatggacaagatcgatgccgttgaaatgcttgtgccaggagttttaccagctgagctttgggaagaatctggtcgttacaagacatacggagctaacttatttaaattaaaggatcgtcatgaacgtgactttatcttaggaccaacacatgaagagacatttactaagatcatcaaagacgcgatcaagacatacaaaaaattaccgttgaagttgtat…	MKQSKMLIPTLKEVPSDAEALSHQLMLRAGYIKQVTAGVYAYLPLAYRVLNNIETIIRDEMDKIDAVEMLVPGVLPAELWEESGRYKTYGANLFKLKDRHERDFILGPTHEETFTKIIKDAIKTYKKLPLKLYQIQMKYRDESRPRFGLLRGREFLMLDDYSFHTDMESLDQTYRDMDKAYQHIFERVGLDFRGIIADAGAMGGKDSKEFMAIAPIGEDTVVYSDSSDYAANLEMAKNLRINKKSHETPKELTKVATPDAKTIDEVSAFLEVEPENMIKTLVFMADEKPVIVLMRGNDELNEVKLKNYLDCDFLDPAEDTKARELLGADFGSLGPVGVAKDIKIVADLDVDGMVNANVGANENGYHYMNANIERDYRVDDFVDLRTVKEGDLSPDGEGV…	Prolyl-tRNA synthetase
NODE_17_length_25813_cov_86.521451	fig|1578.617.peg.491	7356	11702	+	DNA polymerase III polC-type (EC 2.7.7.7)	2.7.7.7	ttggaaccaaataaacaggaattgtttttgcgcttacttgaacagatcaagtggcaacatttaccagaagaacaagagctctttaccggggctgcgatcgataaagtcgaagttcatacagcttcaaaacgctgggaatttgtgatcagtctaaagcaagtgttgccctttacaacatttttgcgctttaaccacgctcttgccaacgcttttgaaccgatcgctcaaacgactttgaatttgaaagcccaagagaaaacgttaaatgatcgtgatctgggtgattattgggcctatgtggtttcaacgtgcggggtcaattcgcctttgatccaagaattgtgtcaaggtaaggtaccgtatttagatgataaccgtgtcatgttgttagctgaaaat…	MEPNKQELFLRLLEQIKWQHLPEEQELFTGAAIDKVEVHTASKRWEFVISLKQVLPFTTFLRFNHALANAFEPIAQTTLNLKAQEKTLNDRDLGDYWAYVVSTCGVNSPLIQELCQGKVPYLDDNRVMLLAENEIIKNFLTTQALGPIERTYHRYGFPKFTINTLIDESKSQAKIDEYKEQKARSDAQLAQQAVEAIQKQNEKRQQKAKEKETVTVDGPVQLGKKIADDAEIRQMATITEEERSVVVQGYIFDKEVRTLRSERKLLIIKVTDYSSSMVIKKFSRNEEDEAMFDALAVGKWVKIRGSVQEDTYMRDLAMNAYDIVEVAHEGRKDTAPKDHKRAELHVHSNMSMMDATNSISDYVKQAATWGQKAIAITDHSTLQAFPEAHSAGLKNNVKI…	DNA polymerase III polC-type
NODE_17_length_25813_cov_86.521451	fig|1578.617.peg.492	12532	12077	-	hypothetical protein		atgacatggtcaacagagactacttctttatttccaaaaccatttttagttctgtttaatttaccttactgctttgtcgaacgctacaaatcgacacttactagaaaatatcgtaaagtgtctgtcacctatggaaagaagatgtctcaaatcataaaagtcgctacccaagaactagaacacaagatcaataaggcgttgactgaagaaaatgagtttgttcaaacagcagtacttacacaaatttcagccacctttttagatcagtgtcagaaatgtgttcaacctaatacgtataaaaacgatggactatttatcaaaaaatttatcgacgatttcggtcatgacactatcataaataatatttccattcaaagcctaaagcgatactttaacaat…	MTWSTETTSLFPKPFLVLFNLPYCFVERYKSTLTRKYRKVSVTYGKKMSQIIKVATQELEHKINKALTEENEFVQTAVLTQISATFLDQCQKCVQPNTYKNDGLFIKKFIDDFGHDTIINNISIQSLKRYFNNDCLTNGAITTLMSSSYNI	hypothetical protein
NODE_17_length_25813_cov_86.521451	fig|1578.617.peg.493	12639	12851	+	hypothetical protein		atgctaaataattttttagggaagaatgttaggataattgatgatgataatatggagtggagaggctatgtaagaagtattgagactccagaggattccgatgatggacaatggtggctagatatagttaatgtgaacaaaccgggttttaagacaggactttcaatatcagagcatgaaataaaggaaatatcagaggtggataatggctaa	MLNNFLGKNVRIIDDDNMEWRGYVRSIETPEDSDDGQWWLDIVNVNKPGFKTGLSISEHEIKEISEVDNG	hypothetical protein
NODE_17_length_25813_cov_86.521451	fig|1578.617.peg.494	12844	12972	+	hypothetical protein		atggctaaaaatgattactatgttttggtctatcgagtgctgatgtatttgtataactgtttgaaaaaaggcgaagatgttgatgttagtaaattaactctccaatggctaggtatcaatgagcgatag	MAKNDYYVLVYRVLMYLYNCLKKGEDVDVSKLTLQWLGINER	hypothetical protein
NODE_17_length_25813_cov_86.521451	fig|1578.617.peg.495	13743	14213	+	Bacterial ribosome SSU maturation protein RimP		gtgagtgttgtagaaacagtaacgaagctagttacaccgatcttggatgatcatcactttgaattagttgatatcgaatttgtcaaagaaggaaaaagttggtatttgcgtgtctttatcgacaaagaagggggtatcaacatcgaagaatgtgcccttgttagtgaccaacttagtgaaaagttggataattgtgatccagatccaattccacaagcttattatttggaagtttcttcgccaggggcagaacgaccattgaaaaaagaaaaagattatgagcgtgctttgaactcatatatcaatgtttcactttaccaacaactcgatggcaagaaagtatatgaaggaacaatgacagcattatccaaagatgagttgacactcgaatatatggat…	MSVVETVTKLVTPILDDHHFELVDIEFVKEGKSWYLRVFIDKEGGINIEECALVSDQLSEKLDNCDPDPIPQAYYLEVSSPGAERPLKKEKDYERALNSYINVSLYQQLDGKKVYEGTMTALSKDELTLEYMDKTRKKTITIPRKQIAKARLAIKF	Bacterial ribosome SSU maturation protein RimP
NODE_17_length_25813_cov_86.521451	fig|1578.617.peg.496	14243	15400	+	Transcription termination protein NusA		atgagtaaggaattacttaacgcattagatgcgcttgaaacagaaaaaggaatcaaaaaagaaattgtgatcgatgcgttggaacaggctttagtttcagcttacaagcgaaattatgataaggcccaaaacgtagaagttgaatttgacaagcgtaaaggtgacatcaaagtctattccgtcaaagaagttgtcaacaatgtctttgactcacgcttggaagttagcttagaagatgcattagagatcaacaaggcttatgaagttggtgatacgatccgctttgaggtgacaccacgtgattttggacggatcgcagctcaaacggctaaacaagtgatcatgcaacgtgtgcgggaagaagaacgccaaatgatctatgatcaatatagcaagtat…	MSKELLNALDALETEKGIKKEIVIDALEQALVSAYKRNYDKAQNVEVEFDKRKGDIKVYSVKEVVNNVFDSRLEVSLEDALEINKAYEVGDTIRFEVTPRDFGRIAAQTAKQVIMQRVREEERQMIYDQYSKYENEIVSGEVERHDSRYIYVNLGNVEAVLSKKDQVPGEVYKSHDRIKVYIYKVVDPSANNNEPEVENKDGKKRRKNRGPQVYVSRSHPDLLKRLFENEVPEIFDGTVEIKSIAREAGDRAKVAVYSAEEGVDPIGTCVGPRGERVQAIVNELNGEKMDIIEWSEDPAKYISNALNPANIVEVRFDPENERVCTVIVPDDQLSLAIGKRGQNARLAAHLTGYKIDIKSESDMAALEADAELAEKAEVSIETTEE	Transcription termination protein NusA
NODE_17_length_25813_cov_86.521451	fig|1578.617.peg.497	15412	15711	+	COG2740: Predicted nucleic-acid-binding protein implicated in transcription termination		atggcacaacgcaagatcccaatgcgcaaagatatcgttactggtgaaatgaaacctaaaaaagaacttgtacgcgtcgtgaaaaataaagaaaatgaagtgagtcttgacccaactggtaaaaaagctggccggggtgcatatattcatttagatgtagctaccgcaaagaaagctcgggaacaaaagacttttgataaagtttttggtgttaagatcgaacctgctttttatgatgaattagtggactatgtcgatcaccaagttgcacgagcagagttatttggcaatggaaaataa	MAQRKIPMRKDIVTGEMKPKKELVRVVKNKENEVSLDPTGKKAGRGAYIHLDVATAKKAREQKTFDKVFGVKIEPAFYDELVDYVDHQVARAELFGNGK	COG2740: Predicted nucleic-acid-binding protein implicated in transcription termination
NODE_17_length_25813_cov_86.521451	fig|1578.617.peg.498	15701	16015	+	Ribosomal protein L7Ae family protein YlxQ		atggaaaataagatcgaacagcgaaaagctctaaacttattgggattagctcggaaagctggcaagttgactacaggccaagatctggtcttagcagcgattcgttccggaaaggctaaggtcgtgctgatggcaaacgattgtgggcaaagcacccaaaagaaattcactgataagtgtaagagctatgatgtagcattaacaacagaatttacaaaacaggagttaagtgctgcgatcggcgcaaagcgttccttgatcgcagttaccgatcctggttttgggaagaagatacgccagcttcttttttcttga	MENKIEQRKALNLLGLARKAGKLTTGQDLVLAAIRSGKAKVVLMANDCGQSTQKKFTDKCKSYDVALTTEFTKQELSAAIGAKRSLIAVTDPGFGKKIRQLLFS	Ribosomal protein L7Ae family protein YlxQ
NODE_17_length_25813_cov_86.521451	fig|1578.617.peg.499	16088	18403	+	Translation initiation factor 2		atgagtaaaaaaaggatttatgaactggctaaggaattaaacgttagcaacaaagaagtaattgaagttgcaaagaaaaatggttttaaagttggcaaccacatgtcatctttagaccaagctgctgaagctaaagttaaagcttcatttgttaaaccagttaaagctagttcacaaaagcaggcgactcctaaaaaagaaaacagcgagaaaaaacaaaatgttgctgtaaacaaaaactcccaaaatgcgcggaataataaccattctaagcatcaaaagcaagcatccgcacaaagaaataatgaaaggcattcagggaagcgtatggaaaaaaacaacaacaataataacgcgaataatacaaaacatcgtggcaataattcccaaggcaatagc…	MSKKRIYELAKELNVSNKEVIEVAKKNGFKVGNHMSSLDQAAEAKVKASFVKPVKASSQKQATPKKENSEKKQNVAVNKNSQNARNNNHSKHQKQASAQRNNERHSGKRMEKNNNNNNANNTKHRGNNSQGNSQNNTQKKNKFSNNRFGGNNNNHKFNKKNKKNKNKKFNQKNNKPAVPPRKNKPLPEVLVYTVGMNVADIAKKIHREPAEIIKKLFMMGVMVNQNQSLDKDTIEILAADYGIKAEEKIEVDVADIDKFFEEEQNNQDNLTSRPPVVTIMGHVDHGKTTLLDKLRHTNVTAGEAGGITQHIGAYQVRHSGKTITFLDTPGHAAFTNMRARGADITDITVLVVAADDGVMPQTIEAINHAKAANVPIIVAVNKIDKPGANPNHVMEQLSE…	Translation initiation factor 2
NODE_17_length_25813_cov_86.521451	fig|1578.617.peg.500	18428	18793	+	Ribosome-binding factor A		atggcacaacattatcgtgtgggtcggttatcacaagagatccaaagggaagtcaatgatattttgactaagcgtgtgcgtgatcctcgagtacaaggcgtgacgatcacgggcgtagaagtgacaggtgacttgcaacatgcaacgatctattacagtacattatctaatttggcttctgatgctgagaaaacacagatcggtttagataaagcaacaggtttgatcagacgtgaattgggtcaacgcttgcgtatttatgtaacgcctgaaattaaatttgaacgggatgaatcagtacgttacggtgatcatatcgatgagcttttaagtaagctacaccagcaagaaagtaatccttattga	MAQHYRVGRLSQEIQREVNDILTKRVRDPRVQGVTITGVEVTGDLQHATIYYSTLSNLASDAEKTQIGLDKATGLIRRELGQRLRIYVTPEIKFERDESVRYGDHIDELLSKLHQQESNPY	Ribosome-binding factor A
NODE_17_length_25813_cov_86.521451	fig|1578.617.peg.501	18879	19784	+	tRNA pseudouridine(55) synthase (EC 5.4.99.25)		atggacgggatccttcctttgaataaagatcgtggtatgacgagccacgatgcagtttttaaatgccggaaaatttttaaaacacgtaaagttggacatagtggcacacttgatcccaatgttgatggtgttttaccgatctgtgtcggtagagcaactaaagcagtcaattatttgatggcatcgggaaaagtttataaaggcgagatcattttaggttttgcaacagaaactgaagatctggatggtgcagttgttgccaaaaaagctattaaacgtccttttagtcaagaacagatcaaccaagcaatggctcagctgaccggtgagataattcagatcccgccgatgtattcggcagtcaaggtcaatggtaaacggctctatgaatacgcacgt…	MDGILPLNKDRGMTSHDAVFKCRKIFKTRKVGHSGTLDPNVDGVLPICVGRATKAVNYLMASGKVYKGEIILGFATETEDLDGAVVAKKAIKRPFSQEQINQAMAQLTGEIIQIPPMYSAVKVNGKRLYEYARAGQSVERPKRMITVDYFKQTKPSTYDAVKKQQTLYFEVGCGKGTYVRTLALDLGEILGVPAVMSDLTRLQSGGFNLKKSVTLEQLTNATPEELETYLYPLEYAFRSYPKVILTEQQWQKVQNGGFLPANIFKDKTTKILLMYGDKARALYYYDDKKDVFRSEQMLDLT	tRNA pseudouridine 55 synthase
NODE_17_length_25813_cov_86.521451	fig|1578.617.peg.502	19799	20746	+	FMN adenylyltransferase (EC 2.7.7.2) / Riboflavin kinase (EC 2.7.1.26)	2.7.7.2	atgaaagttattgaattagctgaaccatatgctaaaagtgagatctatccagaacagatcgtcttagccctaggtttttttgatggagtccatcgcggacatcaagctgtgatcaaggcagctaaacagcaagcccaaaaaatgggtgtcaagctagccgtgatgacttttgatcggcatcccagtgctatttttcagcaacgtgacccgcaaaagatccaatatttgacaccgatcaccgaaaaattagcattgtttgaaaaatttggagcagatattgcctatgtggtcaaatttgacgaaaaacttgcttacttaaaacctcaggaatttatcgataaatatgtcgtaggattaaatgcggtggggatcactgccggtagtgattacacgtatggg…	MKVIELAEPYAKSEIYPEQIVLALGFFDGVHRGHQAVIKAAKQQAQKMGVKLAVMTFDRHPSAIFQQRDPQKIQYLTPITEKLALFEKFGADIAYVVKFDEKLAYLKPQEFIDKYVVGLNAVGITAGSDYTYGPHTVANMKNLPKYAKNRFEIQTVELLKEDEKVGSTGIREALANGKVELAAHYLGYVYQTTGKVVHGFERGRQIGFPTLNIETSPAKQLPAVGVYAVEVGLDGKRYHGMASIGYNETFGDDLAKTLEVNLFDFSAMVYGKKVTVYWKNYLRPMVKFNSIAELIAQLEADKQHSEALLNVQNEN	FMN adenylyltransferase
NODE_17_length_25813_cov_86.521451	fig|1578.617.peg.503	20814	21863	+	Heat-inducible transcription repressor HrcA		gtgctaaaagaggtgatcgtagtgttgactgagcgacagttattgatccttgaggctgtgatccgcaattatacagaagcggggcagccgatcggatcgaagactttacaacaacaattaccggtccatgtgagttcagcgaccattcgtaatgagatggcggttctcgaacagcaaggatatattgcaaaggagcattcaagttcagggcggatcccttcacttaaggggtatcggtattatgtcgataatttgatgaaacctagcaaacttgatcgtaatgctttgtatgatattcgcaactcttttggaaatgaatttcagaagatcgatgagatcctagcgacttcagctaagatcttatccgatttgacaagttatactgctatttcgctcaaa…	MLKEVIVVLTERQLLILEAVIRNYTEAGQPIGSKTLQQQLPVHVSSATIRNEMAVLEQQGYIAKEHSSSGRIPSLKGYRYYVDNLMKPSKLDRNALYDIRNSFGNEFQKIDEILATSAKILSDLTSYTAISLKPEAKDLRLEGFRLVELGNQQVMVILVTSDGTVESQTFTMPSGISGSELEAVIRLINDKVVGLPLRQVIVRLNECLPLLNRYLHQPAGFIDVFGNILSRAAKEQVYVGGKMNLLDFSKDASLEQIKSLYSLVDQTQGIGSLVDSTKDGISIKLGDELPSILLQNYSLISATFDDGNHGQGTIAILGPTNMPYSKMIGLITVFRDELTKIINDYYQKF	Heat-inducible transcription repressor HrcA
NODE_17_length_25813_cov_86.521451	fig|1578.617.peg.504	21893	22468	+	Heat shock protein GrpE		gtggcagaagaagagatcaagaatgctgcagcagagcaaacagcaccggatgaaactgaagtaaaaaatgattcagtggatgatccaaagaaagaagaagctgttgatgaagtcacagttttgactgatcagttagctgaactgcaaaaaaaatatgatgaattagaagatcgctattaccgttcagaagcggagatggcgaacatgactaagcgtttcaaaaaagaacaagagcaacttcttcgttatgaaggtcaagatctagcacgtgatattttaccagttgtcgataatttaacacgtgccttgcaaacagaagttgaagatgctggttcaaaacaactcaagcaagggatcgagatcgttgcaagagatctcgacaaggccttacaaagtaat…	MAEEEIKNAAAEQTAPDETEVKNDSVDDPKKEEAVDEVTVLTDQLAELQKKYDELEDRYYRSEAEMANMTKRFKKEQEQLLRYEGQDLARDILPVVDNLTRALQTEVEDAGSKQLKQGIEIVARDLDKALQSNDVTKIASLGEEFDPTKHQAVKSVPVEEGQTPETIVQVLQEGYMLKDRVLRPAMVVVAQ	Heat shock protein GrpE
NODE_17_length_25813_cov_86.521451	fig|1578.617.peg.505	22492	24336	+	Chaperone protein DnaK		atgtcaaaaatcattggtattgaccttgggacaactaactcagcagttgctgttcttgaaggtaaagaagcaaaaattattacaaatccagaaggtaaccggacaactccatctgttgtttcatttaaaaatggtgaaactcaagttggtgaagtagctaaacgtcaagcgatcactaacccaaatacgatcagctcgatcaaacgtcacatgggtgaagctgattatactgtagatatcgaaggtaaagaatacacaccacaagaaatttcagcaatgatcttgcaatacatcaaagaatatgctgaaagctacttaggtgaagaagttactcaagctgttatcacagttccagcttacttcaatgactcacaacgtcaagctactaaagatgctggt…	MSKIIGIDLGTTNSAVAVLEGKEAKIITNPEGNRTTPSVVSFKNGETQVGEVAKRQAITNPNTISSIKRHMGEADYTVDIEGKEYTPQEISAMILQYIKEYAESYLGEEVTQAVITVPAYFNDSQRQATKDAGKIAGLKVERIVNEPTAAALAYGLDKQDKDEKVLVFDLGGGTFDVSILELGDGVFQVLSTNGDTNLGGDDFDNKIIDWLVAEFKKEHGIDLSTDKMAMQRLKDAAEKAKKDLSGVTSAQISLPFITAGEAGPLHLETTLTRAKFNELTHDLIERTKIPVRNALQDAGLTNADIDEVILVGGSTRIPAVKEAVKAETGHTPNESVNPDEAVALGAAIQGGVITGDVKDVVLLDVTPLSLGIETMGGVFTKLIDRNTTIPTSKSQVFST…	Chaperone protein DnaK
NODE_17_length_25813_cov_86.521451	fig|1578.617.peg.506	24465	25592	+	Chaperone protein DnaJ		atggaaaagaatccttatgatgtcttaggtatttccaaagatgcatctgctgatgagatcaagcgcgcttatcgcaaactatcaaagaagtatcaccctgacttaaaccatgaagctggggcagaagaaaagttcaaagaggtaaacgatgcttatgagattttaagtgatccgcagaaaaaggctcaatttgatcagtttggctcgactggagctcaaggatttggcggtgctggtcaaggctttggtggcggctttgaaggtggtttcggtggttttgacgatattttcagttcattctttggtggcggtggtgctagtcgttcacgcacagctccgcgtcaaggtcgtgatctgcaatatgaaatgaacttgacctttgaagaagcaatttttggt…	MEKNPYDVLGISKDASADEIKRAYRKLSKKYHPDLNHEAGAEEKFKEVNDAYEILSDPQKKAQFDQFGSTGAQGFGGAGQGFGGGFEGGFGGFDDIFSSFFGGGGASRSRTAPRQGRDLQYEMNLTFEEAIFGKTTEIEYTREEDCDTCNGTGAKPGTSPVTCSHCGGRGFVQVERQTPLGRIMTQQECDVCGGTGKEIKEKCTTCHGSGHIRKKHAVEVKVPAGVEDGNQMRLQGQGEAGVNGGPYGDLFIVFNVAPSDTFKRDGSEIYLEQPITFVQATLGAEIPVKTVHGDVKLKIPAGTQTGTTFRLRGKGAPRLHGTGNGDERVTVKVQTPKSLNKQQKIALKAFAEASGDEVADEGNFLDRLVKALKNE	Chaperone protein DnaJ
NODE_17_length_25813_cov_86.521451	fig|1578.617.rna.6	25678	25751	+	tRNA-Arg-TCT		ggtctggtagctcagttggatagagcaacggtcttctaaaccgtaggtcgtgagttcgaatctcacccggatca		tRNA-Arg-TCT
NODE_180_length_1214_cov_7.414903	fig|1578.617.peg.507	1	459	+	hypothetical protein		gatttccggctaggcgtcattaaaataatcgcgtacgaaacaagtagtatactagataatgaacgtaataacacgcctttggctaggatcgttagaaagctggaaggtgaagaaagcaccagcttagacaatataccaaaaggtaattatgaagactttataagacgtataccaaaaaacgcgaaatatacaagaacttataagctaaatggtgcaatgtacggtgaattttttgacggtactaactattatataagtaataagtgtgataaaaattacaagctcaaagaagctttatcttatgatgacgttgacgagtattttaaacttgtcgacggcgagaaatattacacgttacgcgcgtattttttaggtggtaaagtattttttactaacgta…	DFRLGVIKIIAYETSSILDNERNNTPLARIVRKLEGEESTSLDNIPKGNYEDFIRRIPKNAKYTRTYKLNGAMYGEFFDGTNYYISNKCDKNYKLKEALSYDDVDEYFKLVDGEKYYTLRAYFLGGKVFFTNVKTRSMFIKRFKKISLVGGV	hypothetical protein
NODE_180_length_1214_cov_7.414903	fig|1578.617.peg.508	461	1198	+	hypothetical protein		atgagtgaaaaaaatataaacccgatcgcaaattacttacttgctaagggctttgataaaaacgcgatcattggggcgcttataaatatgggccaagaaagtgggtggagtccatatagtgacgaaaaaccgagctggaacggaaaattttataaatataacccttatcaagatgtatcgcatgggtatggtttagtacaatacagtttccagccgatcgcacaaaaaatttgggactattgtcacagcggtaaaagcgaatgggaatgtataaagtatcagcttgacatgtttcctgatgagatgggctttaattattctactggcgggagctggaatcctagctataaaggatatggacattttaggaattattggactaataaatataaaaagggt…	MSEKNINPIANYLLAKGFDKNAIIGALINMGQESGWSPYSDEKPSWNGKFYKYNPYQDVSHGYGLVQYSFQPIAQKIWDYCHSGKSEWECIKYQLDMFPDEMGFNYSTGGSWNPSYKGYGHFRNYWTNKYKKGYEAMAYDFLNGFERGVDGGRVGKFASVVLRNVKWDGVFPEGTGTSVPEEKPADQPEKKKVRALSLQECLSFLDRARPQHEHSPEPGTTGNQPTPSEPTTGAIGKVMQVFNDA	hypothetical protein
NODE_181_length_1203_cov_1085.098291	fig|1578.617.peg.509	1	1203	+	Mobile element protein		aaaatgaaatatcattatggcctaaaaatgcgctgctatcctagtgaccaacaaaagcagttgattaaaatcaacagtgacgctagtcgctttatctataacgaaatggttgcgatcaataaggaactgatgcagcttcgcagagttaagctaccgattgacatagttcgggatcgtattaagcaactaactatgcgccaaaacgctaagcaaatgtctaatcactatcaattcttagaagataaacgaattgatagtttgacgaaagctaatgccattcagaactatcggaaagcttggaatgcttttcggaaggttcacaccgctggtgttcctaagtttcatcgaaagaattatcgctggcgttatcaaaccaattgtcaatacccagggcaaaag…	KMKYHYGLKMRCYPSDQQKQLIKINSDASRFIYNEMVAINKELMQLRRVKLPIDIVRDRIKQLTMRQNAKQMSNHYQFLEDKRIDSLTKANAIQNYRKAWNAFRKVHTAGVPKFHRKNYRWRYQTNCQYPGQKTALLTNGTVCFLDNSHVKVPKIGLLRVAGSQARLLKRICETRIGTVTLTKDSADRFFLSMQLASDESFVKVAKATHGHVGIDLNTDNFLTDSGGNIVPNPRYYRTIKGKLAKEQRILSRRQQRAKKEHRSLRDSKNYQKQRLLVAKLHAKVMNQRHNFLQQISTALIKNHDLVVAEELRSKNMLKNHALALSISDVGWRTFLGMLAYKAKLYGRQFITINPRNTTQTCCDCGFVMGTNGTDKLTLDDRKWTCPNCGIHHIRDWNAA…	Mobile element protein
NODE_182_length_1190_cov_1324.426102	fig|1578.617.peg.510	8	298	+	hypothetical protein		gtgaactacaattgggcagttgaaaaataccatattagttaccaacaagtttatggctggtatcaaaagtatcgcaaaagcggtaatgacccagaatcacttcgtgatcgccgaggcaaagctaagccagaagagaagtggacggaagttgaccgactcaaggcagagaatcgcttattaagggctcagctagaaaagcaagagatggagattgcattcgcaaaaaaattaacagaaatacgcaatcgggaggtggaaaaggactccggtaccaagccatcaaagaactaa	MNYNWAVEKYHISYQQVYGWYQKYRKSGNDPESLRDRRGKAKPEEKWTEVDRLKAENRLLRAQLEKQEMEIAFAKKLTEIRNREVEKDSGTKPSKN	hypothetical protein
NODE_182_length_1190_cov_1324.426102	fig|1578.617.peg.511	328	1146	+	Mobile element protein		ttgtgtaaaatagctgattcttcgcgagatggttattacaaatggctcaatcgaaagccaagtcaatatcataatgagcaagcagagttacttgaagcgattgtagagttagaagaagaacataattggacgctgggatatttagcgatgactacacagttaagctttgaaaaccgtttaagctttaccgctggattaaaacgaataactaactgcatgcgtaagcatggaattagagcaaatattaggaagaagaagcgcaatcgaattcaacgccatgaagaatacatcaatgacaacttattgcagggacaattcgaccgtgaaactaaaaatgaagtgtgggttaccgacacaacggaagtagcctacggcgaacacacacttcataaagtacga…	MCKIADSSRDGYYKWLNRKPSQYHNEQAELLEAIVELEEEHNWTLGYLAMTTQLSFENRLSFTAGLKRITNCMRKHGIRANIRKKKRNRIQRHEEYINDNLLQGQFDRETKNEVWVTDTTEVAYGEHTLHKVRVHVILDLYGRYALSYNISDTETSSAVIETFNRAFTVEPDAQPMIHTDRGSAYCSSMFNDYLASKNCIHSMSHPGHPWENSPIERWWNDFKLIWINKHPRPKTLAELEQLVKGAIEYFNTKRAYTSKNGLTAEQFRNQAA	Mobile element protein
NODE_183_length_1187_cov_16.392548	fig|1578.617.peg.512	302	66	-	hypothetical protein		atgactttacctgagccagttaaaattattgaaacaccacatcatttttggtttggtggtgttgatctagcctatgctgtagttggagatactaaggtcgaaaaactaggtatgatcgacggaaaagaacattatcaagtaacgaaatcttttattgtcagttcttatgaatattcaaagtatgacgatccttatgaagaagcatttgctagaataactgaaaaagacgagaaataa	MTLPEPVKIIETPHHFWFGGVDLAYAVVGDTKVEKLGMIDGKEHYQVTKSFIVSSYEYSKYDDPYEEAFARITEKDEK	hypothetical protein
NODE_183_length_1187_cov_16.392548	fig|1578.617.peg.513	398	982	+	hypothetical protein		atgtacaaaaagaaattattatcttttgttttattgggagtttgttctcttgttttatccgcttgctctagctcaactgattcaaaaaaagatacatcatcaagttcttcttcagttgaaactgctaaaagtgctgatacctcttcaatggcgaagaagtcaaaagatagttataaagatggggcattaacggtaaatgatgttgagtacaaaataactgaagctaagacatatcctagtgcttctgatggtaaaaaaattattgcactttatttagatatcactaatcatggttctaaaccagctgatttattggtcgaatacaatccacacacatatattcacgctgaacaaaaagcagataattctattaaaaaattaaatgtcggtatcccaaat…	MYKKKLLSFVLLGVCSLVLSACSSSTDSKKDTSSSSSSVETAKSADTSSMAKKSKDSYKDGALTVNDVEYKITEAKTYPSASDGKKIIALYLDITNHGSKPADLLVEYNPHTYIHAEQKADNSIKKLNVGIPNIDENGNSVEQERQDVIANDKVTSGSTVQGIMFFELVNDSPVTVTFENSSFDNLGEKTYNLQ	hypothetical protein
NODE_184_length_1186_cov_73.468343	fig|1578.617.peg.514	2	1087	+	DNA recombination protein RmuC		aatgagcagatcagaaagacagtagtgactgccttacaagatagccgtaaagagcaaaatgatcaatttcatgtgtttagcgaaaaagtggacaggcgactttcagctattcagcgtgtgaatatcgaaaatatcgagaagatcaatacgacccttgaggataggatgaattcattgcaagaaagtaatgaaaaaaggcttgagcagatgcaaggcatagtggatgaaaaattacagaaaacacttgaatcacgtttgtctaagtcttttgaaatagtaaataagcagcttgaaagtgtagggcagggtctaggagaaatgaaagctctggcggccgacacaaagtcactgaaaaatgctctgacaaatgttaaagaacgaggcacatacggtgaagtt…	NEQIRKTVVTALQDSRKEQNDQFHVFSEKVDRRLSAIQRVNIENIEKINTTLEDRMNSLQESNEKRLEQMQGIVDEKLQKTLESRLSKSFEIVNKQLESVGQGLGEMKALAADTKSLKNALTNVKERGTYGEVRLEKLLSDILAPNQYEMNVEIASGKRVEFAVKLPGNGDVPLLLPIDSKFPIEDYNRLLDAGDKAAIDIARRSLTAKIRTFAKDIHDKYIVPPKTADFALMFLPTEGLYAEVIQNVALFEELRDKYKVTVVGATTLSAFLASLQMGFKTLAIEQRSQEVWEKLRAVKLEFDKFGGVLEKAQRQLQTADKTLTEIVGRRTRAINRTLRGVEELTENNYSSKKPVEDSGNN	DNA recombination protein RmuC
NODE_185_length_1166_cov_101.975287	fig|1578.617.peg.515	1166	3	-	DNA topoisomerase III (EC 5.99.1.2)	5.99.1.2	aaacgaaaagatatctcagaagcgatcatcgctactgatgcggggcgtgagggcgaattagtagcgcgctggatcttggaatatattcgtttcaataagccagtcaaacgtttatggatctcttcacaaaccaataaagcgatcaaagaaggatttgctgcactaaaaccagctaaagcttacgatgatctttattattcagccttagctcgggctaaagctgattggctgatcggattgaatgtgacgcgcgctttaacggtcaagtaccaagataatttatctgctggtcgggtccaaacgccaactttagctttggtcgctaagcaagaagaaaagatcagcaaatttatcccgcaaaaatattttacgctcagtctcgaagttgctggtcaaaga…	KRKDISEAIIATDAGREGELVARWILEYIRFNKPVKRLWISSQTNKAIKEGFAALKPAKAYDDLYYSALARAKADWLIGLNVTRALTVKYQDNLSAGRVQTPTLALVAKQEEKISKFIPQKYFTLSLEVAGQRATRVQKDPYALKERQAVDELVKKLSSQNGKVEQITAKDKTIPAPLPYDLTELQRVANEKYGYSAKKTLSLVQSLYEVHKIVSYPRTDSKYLSNDLKVTLKDRLHAIAGLFPEAKQYAVKGAKVVQNKAFNDAKVTDHHALIPTEQLPQYNKLNSDEHRIYTLIAERFVGLFAAPHKERQEKIVFGFGKEHFKLTQTKVIEAGWKKKEIPEKSVAKFSEGMQISPRFTVKEALTTPPKPLSEGALLAQMERYSLGT	DNA topoisomerase III
NODE_186_length_1147_cov_81.948833	fig|1578.617.peg.516	2	604	+	hypothetical protein		tttgattgggtgactgaacccggtgcttgtcaaaagtgtacatttcttgcgctgagtggaccgtataaagttggtgatgaggacagcccgagagtaccagaaagttcgcatcctaattgtcggtgtcggcgtatcaaggcagaaattttagatgagcaacttggcgcgaagttaagaatggatctacaatattttgccaagcctcgaaattacgacgatgtccaaaaaatgattgcggacggtagtattagtcctgagaaattcgaagaacgcaaaaaagagttcgacaaagcattttctaaaggtgctcagactccgcttgggaaaatagttgatggacgtgatagttattatcacattattggacgccacgatgaccaattattcaatgacgatgga…	FDWVTEPGACQKCTFLALSGPYKVGDEDSPRVPESSHPNCRCRRIKAEILDEQLGAKLRMDLQYFAKPRNYDDVQKMIADGSISPEKFEERKKEFDKAFSKGAQTPLGKIVDGRDSYYHIIGRHDDQLFNDDGVQRIVDTLKNPAAVYETTDRRGTKGEMYVQNSSDDSLIVVTRNGRIVTAYEPDPRYLNKQKEGKRLY	hypothetical protein
NODE_186_length_1147_cov_81.948833	fig|1578.617.peg.517	604	912	+	hypothetical protein		atggagttcgaaaatgttgattttaaagcaaccacgtattttatggatgagacagtgcctgcaattggtgttgattttttagatgtatcgggaaaaacgtttttcggtgaaattgaacttcctggcgatggggtatctatgatttatacagattcaacgaaagaaggagaaataagttacattgagattgtagatccttctgattttttaagtgatccagctttagacaatattgaaatcaatggatataacgtcaaggaactaatcagggtagcatatcgtcgattgaacattgaacaattaatttaa	MEFENVDFKATTYFMDETVPAIGVDFLDVSGKTFFGEIELPGDGVSMIYTDSTKEGEISYIEIVDPSDFLSDPALDNIEINGYNVKELIRVAYRRLNIEQLI	hypothetical protein
NODE_186_length_1147_cov_81.948833	fig|1578.617.peg.518	964	1146	+	hypothetical protein		atgaagtctaattcttatgctcgagtggcatgcaagatcttgaaatacctaaatgattgttacgaaaacggcttagaacccagtatcgacagtttgaatgctaatatgttaggtatttcagatcggcagttctatcagactatgaaaatgctgtctgatgatggttacgtcagaggtgttgag	MKSNSYARVACKILKYLNDCYENGLEPSIDSLNANMLGISDRQFYQTMKMLSDDGYVRGVE	hypothetical protein
NODE_187_length_1145_cov_4.669964	fig|1578.617.peg.519	89	3	-	hypothetical protein		atgaaagtagcaaatgatgtgatcgattggttgatctcaagtggtgctttagtaagttttattgcttttgcttgggcttatgtaaaa	MKVANDVIDWLISSGALVSFIAFAWAYVK	hypothetical protein
NODE_187_length_1145_cov_4.669964	fig|1578.617.peg.520	267	73	-	hypothetical protein		atgagcgaccaagtacttgtggccgtgatcagtgctttgggatctgccttagtcgcatggatcacggcacacgagaacaatagacaaaaaatggataagctcgaaaagaaaagcgagttagagaagttgcaagaagaaaacactcgattaaaagaagaactagaaaggaagaattgtgatgaaagtagcaaatga	MSDQVLVAVISALGSALVAWITAHENNRQKMDKLEKKSELEKLQEENTRLKEELERKNCDESSK	hypothetical protein
NODE_187_length_1145_cov_4.669964	fig|1578.617.peg.521	652	269	-	hypothetical protein		atgatcaaaaatttaaaaaagaatcgtttttggttatttaaagcgttagagacttatgctctggcgctttattttattgtcaaacgtagttcagggatatttagtttagacggatatggatatcttgaagttttagatgatccgccgtttgtttttttacttgcggcagtagggacggtgactttggtctatgctttatgggatgttaaacatctgttttatcgtcctgtgatgacgggattattaacaggcgtgtggctgttatttttcttgtcatttgcgatcacagatgcattagttggtgtctatattggttttcccggaatttttgcatttttcgtactgactgaaatggtgactgagatttttgcgaaagggtggtaa	MIKNLKKNRFWLFKALETYALALYFIVKRSSGIFSLDGYGYLEVLDDPPFVFLLAAVGTVTLVYALWDVKHLFYRPVMTGLLTGVWLLFFLSFAITDALVGVYIGFPGIFAFFVLTEMVTEIFAKGW	hypothetical protein
NODE_187_length_1145_cov_4.669964	fig|1578.617.peg.522	957	694	-	hypothetical protein		atgttaaaaaaagaaaaaacactcaatttaacgggacgatcattggtcaatggtactgatgtagtacgttttgatgctcgattatcatcgactggcgggactacaacgatcaatacgtatgttaatgatcaagaactttatgaaaaaaatcgacgtgaagtacggaaagatatgaatgattttcgtcaatatgtatttgaccaagaagatgagttgtttgatgatgtgaaaacagatgaatctgatacaacggccacagaataa	MLKKEKTLNLTGRSLVNGTDVVRFDARLSSTGGTTTINTYVNDQELYEKNRREVRKDMNDFRQYVFDQEDELFDDVKTDESDTTATE	hypothetical protein
NODE_187_length_1145_cov_4.669964	fig|1578.617.peg.523	1144	959	-	hypothetical protein		aaagtaacagctgagattattgaattatttgacgaaaaagctgtgatcgacatcacagaataccatgataaattacatgctttatatgatgcattgaatgaatatgagtatgatttatctggtgatgacgctaatgcatatgatttattgctggatgaattggaaaagatcaaggaggacaaataa	KVTAEIIELFDEKAVIDITEYHDKLHALYDALNEYEYDLSGDDANAYDLLLDELEKIKEDK	hypothetical protein
NODE_188_length_1127_cov_93.382998	fig|1578.617.peg.524	1067	99	-	Malate permease		atggcagtttttttaacttccgtctcaagtgtgcttgtgatcgtattgatcatggcactgggttatattttacgtaaaacaggttggtttgccgattcatttggaggtaatatcgcatctttgatcaccaagatcgctttgccagcatcgatctttatgggtgtgatggatcacttgacgcgtgaaagtctcttaggtttaggaaaaggtattatttttccagctttgggtgtgatcattggttatgtgatcgcttggttggcagttaaaggcttaaagatcaagccaggtcggcgcgggatctttatgaatgcggtcgttaatgccaatacgatctttatcgggatgcctttgaacaatgcgctttttggcgaaaaggcaataagttatttcttgatc…	MAVFLTSVSSVLVIVLIMALGYILRKTGWFADSFGGNIASLITKIALPASIFMGVMDHLTRESLLGLGKGIIFPALGVIIGYVIAWLAVKGLKIKPGRRGIFMNAVVNANTIFIGMPLNNALFGEKAISYFLIYYIINTVSTWAFGVYLISNDDPTVDKSQKKAHKINWKKVLPMPLVGFIVAIVWLLLEIPVPSFMGQTLSYVGALVTPLSLIYIGIVLCDAGLNNFRFERDSSLALLGRFVLSPIVLILLIKAGTSFGIDLPTLMRQTLVVQSATPMLAVLPILAKEAHGDVKYATDVVVMSTVLFVVVVPILMAILQFI	Malate permease
NODE_189_length_1106_cov_102.238583	fig|1578.617.peg.525	3	296	+	hypothetical protein		tactctttattttatgataaatcaaaaaagctgtgtaatgaagtaatatcattacacagtaaaaagtatagagccggtaaagctatcaaatatcaagttgtagaagtcacacaggtcaaagggtatctcacccaccaagtaaacacaggtgaaaataaagtgaccttgatcaatcgttattgtccaccattgaattatccaaagcattgccataaatcaaaagtgcctaaaaaagactattatggtaaacaccacgggatgaatttcttcccgggatatatcatttgttattaa	YSLFYDKSKKLCNEVISLHSKKYRAGKAIKYQVVEVTQVKGYLTHQVNTGENKVTLINRYCPPLNYPKHCHKSKVPKKDYYGKHHGMNFFPGYIICY	hypothetical protein
NODE_189_length_1106_cov_102.238583	fig|1578.617.peg.526	923	342	-	hypothetical protein		atggaaaatgatttagaattgaccaacttattatttcaactaaaaacttttgccgacagcttagccctgcaactattagtcaaaaaataccaacccatgatcttaagcttgatcggtcattttcacttacaacttttagataccgatgacctattacaagaggctcggatcatttgttatcaaacagcgtgttcctttgatccaactaaagccaacattacttttggtgcttacttcaagctcagtctctgcaaccattttcgttcgctcttacgccgtgaaaatgcccagaaacgtctacttgaaaagcaagtcatttcacttgaagagctactctatgaaaaaggtgacattttgccgatgactcttggtgattttgaattaaggatcgaacttgaa…	MENDLELTNLLFQLKTFADSLALQLLVKKYQPMILSLIGHFHLQLLDTDDLLQEARIICYQTACSFDPTKANITFGAYFKLSLCNHFRSLLRRENAQKRLLEKQVISLEELLYEKGDILPMTLGDFELRIELELLLQKLPTLLTPLEYRVFCAYLHYQKASLVAQKLELSQSQINNAMQRYHHKLARWYQKNG	hypothetical protein
NODE_189_length_1106_cov_102.238583	fig|1578.617.peg.527	1104	988	-	hypothetical protein		gtctctgatactattgagatgatgctaaaaaatgggctcattgatgaggctgtgtttattgagacttatatcacagcctcgtcttttttttataattttccttttttaactccataa	VSDTIEMMLKNGLIDEAVFIETYITASSFFYNFPFLTP	hypothetical protein
NODE_18_length_25768_cov_99.013911	fig|1578.617.peg.528	204	1076	+	UTP--glucose-1-phosphate uridylyltransferase (EC 2.7.7.9)	2.7.7.9	atgaaagtaagaaaagcagttattcctgccgctggtttagggacacgatttttgccggcaactaaggctttggctaaagaaatgctgccaattatcgataaaccaacgattcaatatatcattgaagaagctaaaaaatctgggatcgaggatatcttggtcgtaacaggtaaaggtaaacgtccgatcgaagaccacttcgattcagttcctgaattggaacaaaacttaaaagaaaaaggtaagacggatctgttacgtctggtcgaacaaacgactgatatcaacttgtactttatccgccaatcccacccacgtggtttgggtgatgcagttttaatggctaaagactttgtgggcaatgaaccatttgtggtcatgcttggtgatgacatcatg…	MKVRKAVIPAAGLGTRFLPATKALAKEMLPIIDKPTIQYIIEEAKKSGIEDILVVTGKGKRPIEDHFDSVPELEQNLKEKGKTDLLRLVEQTTDINLYFIRQSHPRGLGDAVLMAKDFVGNEPFVVMLGDDIMEDKVPLTKQLMNRYEETHASTLAVMKVPHEEVNKYGVIDPTSETKPGLYDVKQFVEKPDVDKAPSDLAIIGRYLLTPEVFTMLETQEPGAGNEIQLTDAIDRLNKIQRVFAHEFKGQRYDVGYKFGYLKTSIQFGLRHPEVQAELKEYIKELGKTLK	UTP--glucose-1-phosphate uridylyltransferase
NODE_18_length_25768_cov_99.013911	fig|1578.617.peg.529	1136	1648	+	hypothetical protein		atgacacgtaaacatcatcacggcaaacacagtcgacgtggtctagcgttgaaaataggggcaactatgttagttgtattattggtatgtattgttgcatggaaaaacgagacgatccacagtagattagttagtgcttttggcgataatgaaagattgcaaaaagtagaatatgacaagcaacgagccctagctgctaaaaaatatggttcttcaacaaaagaggtgccaaaagcatcagctaagactgataaagcgtctgtcaaagcaaacacaagtcaaagttcaactgtgacaaatagtgcaagtgagcgttcaagttctaagtatggcacgtatacggtccaggaaggtgactatctctcgacgatcgcaactaaatacaatacaacggtccaa…	MTRKHHHGKHSRRGLALKIGATMLVVLLVCIVAWKNETIHSRLVSAFGDNERLQKVEYDKQRALAAKKYGSSTKEVPKASAKTDKASVKANTSQSSTVTNSASERSSSKYGTYTVQEGDYLSTIATKYNTTVQELMELNALESSRVAAGETLKVPIKDQQQTSTRSAETE	hypothetical protein
NODE_18_length_25768_cov_99.013911	fig|1578.617.peg.530	1659	2579	+	Ribonuclease BN (EC 3.1.-.-)	3.1.-.-	atggaatttaagacagttagacaagagttggatgctttctacaaaattgcgagtaaaaattttaaacgcgctaatatcagtaatactgcgatcgtgatcgcctattatactttagttgcgatttttccgatggtcatttttatcggaaatattttgccattattgcatatcaaagctagtgagatcttgccttatttagagatggcagttccaaaagctgtttataccaccctcgaacccttattagaaacttttttgagcaatggttcttcagggggagtcgcctcagtcagtgggatcatctccgtttgggcagctagccgaggaataaatgccttaaagaaagctttcaatgaagcctttggagttggaaatgatcaagggatcttcacccagcgg…	MEFKTVRQELDAFYKIASKNFKRANISNTAIVIAYYTLVAIFPMVIFIGNILPLLHIKASEILPYLEMAVPKAVYTTLEPLLETFLSNGSSGGVASVSGIISVWAASRGINALKKAFNEAFGVGNDQGIFTQRILSFLITIFIGALLVIAFVVYSFGQLVLEYFIPIFSLPLDWLTTFTQLKWPTTLLGIFLIMCLLYLLVPNAKVHLRYLWVGALFSTLGWMLLTQGFSFYVRYFARSVLSYGTIGTFIVLLFWMNYSALVIMVGAVINATLEERKYGTIRSKRTLDHFNDSSVKRFFNWKYRSK	Ribonuclease BN
NODE_18_length_25768_cov_99.013911	fig|1578.617.peg.531	3413	2616	-	Regulatory protein RecX		atggctaaaaaaatcactgcgatcgcgacgcaaaaaaaagccgggcgtttcaatatctatttagacggtaaatacgccttttcggtcagcgaagacgttttgatcaaatatcgtctcgctaagggcctcgaacttgatgaagaaatgatcgaacacttacagcaagccgacctgctctctaaggcctacaataaagctttagatcatctcagctatcaattacggactaaaaaagagatcaagatctatttaactaaacttgaagttcctgaaaatgatcaaaaccagatcatttctaaattagtcgaattaaatctcttagatgacttggcttatgctaaaagttacgtccgcacagcggctaagacaactgataaaggaccatttgtgatcgctcaa…	MAKKITAIATQKKAGRFNIYLDGKYAFSVSEDVLIKYRLAKGLELDEEMIEHLQQADLLSKAYNKALDHLSYQLRTKKEIKIYLTKLEVPENDQNQIISKLVELNLLDDLAYAKSYVRTAAKTTDKGPFVIAQKLKQKGVAEEFINEALIEFSLEQQVQTALKLAEKFVAKNKKLAFQALKNKLYQHLVTKGFSSETISLVLEELALKKDDTLQLEALREQGAKLLRRYQHYPQPECFFKLKQALYRKGFSLSEIERYLAEITTE	Regulatory protein RecX
NODE_18_length_25768_cov_99.013911	fig|1578.617.peg.532	3500	4891	+	RNA methyltransferase, TrmA family		gtgaaacgagtaaagcccaaaatggcctctgaggtcagattgaaaaaagaccaaaaaattgttgtgacgatcaagcgtttaggcataaatggtgaaggtatcggatattataagcgaaagatcgtctttattcctaaagctttaccaggcgaagtcgtcttagccagtgtgacagaagctaaagaaaaatatgccaaggcgcgtttgttaaagatcaaacaagaaagtccagctcgagttcaaccagtcgataaatatgatgttggtgggatcgaacttgaacatttagcttatccagctcaattggaatttaaacaagatgtgatcgcacaggctttagctaagtatcgcccagctgggtataaagaatatgagctacgcccgactttgggaatggct…	MKRVKPKMASEVRLKKDQKIVVTIKRLGINGEGIGYYKRKIVFIPKALPGEVVLASVTEAKEKYAKARLLKIKQESPARVQPVDKYDVGGIELEHLAYPAQLEFKQDVIAQALAKYRPAGYKEYELRPTLGMADPYHYRNKAQFQVRKNKAGQVIAGLYKENSHILVDLPTFATQRDLTMKVINTVRKLLEKWQVSIYDERKDQGAVKTLVVRESFATKEVQLVFITRTAQLPRKNEMLTEIKQLLPEVVSVMQNINPQKTSLIWGEETQLLMGKESITERLGDVSFELSARAFFQMNPLQTKVLYDEVKKALELSPNETLVDAYCGVGTIGLYVGKEAKEIRGMDIVAEAVADAKINAKKAGRNAIYTTGKAETVILKWLKEGFSFDALVVDPPRTGL…	RNA methyltransferase, TrmA family
NODE_18_length_25768_cov_99.013911	fig|1578.617.peg.533	5016	5561	+	Cysteinyl-tRNA synthetase related protein		atgcgtcattcaaatgggccaaaagaaggcgagtttattacgatcaagagttataaacacgatggtagcctacatcggacatggcgcgatacgatggtacttaagacaagtgaaaatgctttgatcggatgtaatgatcacactttagttacagaagctgatggaaggcgttgggtcacccgtgaaccagctctggtttatttccataagcactactggtttaacattgtggcgatgattcgtgataacggggtctcctactactgtaatctagcctcaccaatggttttagataaggaagctctcaaatatatagattacgatctggatgtaaaagtatttcctaatggcgaaaaacgtttgctcgatgtagatgagtatgctgagcacagtgctaaa…	MRHSNGPKEGEFITIKSYKHDGSLHRTWRDTMVLKTSENALIGCNDHTLVTEADGRRWVTREPALVYFHKHYWFNIVAMIRDNGVSYYCNLASPMVLDKEALKYIDYDLDVKVFPNGEKRLLDVDEYAEHSAKWKYPAKTDLILKHNVKTLVDWIEHGKGPFSKEYVEIWYNRYLELSRRQ	Cysteinyl-tRNA synthetase related protein
NODE_18_length_25768_cov_99.013911	fig|1578.617.peg.534	5660	6784	+	UPF0118 membrane protein YueF		atgtttaataaaaaaagacgttatcgtttgatgtattggtcacttgagttgttgttagtcgcattgttgatctttgtttgtacccagataggtttcattttcgaaccgatcgggatattcatttcaacgatctttgcgccagtattgatcgcaggtttcttattttatgcgctgaatcccttggtcaatttgcttactaaagtccagtataaaaggtttaagatcgggcgcacttgggcagtgacgctcgtctttctcttgttctttgctttgatcggtttggcagttgcttatttagtccctaaattaacgacccaggtcgaacaattagtcgcacggacacctaagtatttaagtgagcttcaagcatacttaactgaactagcacggaattctaaa…	MFNKKRRYRLMYWSLELLLVALLIFVCTQIGFIFEPIGIFISTIFAPVLIAGFLFYALNPLVNLLTKVQYKRFKIGRTWAVTLVFLLFFALIGLAVAYLVPKLTTQVEQLVARTPKYLSELQAYLTELARNSKRPDWADKIDLTEYINNIKGSVNGILKNFMGSLTSSLGSMIGAVTSITMTIVTVPFVLFYMLKDGPKLLPNIKRMLPDKQADVIGDLLVKMSDTIAKYISGQVIECLFVGTFSAIGYGLVGIPYALLIGMFAGITNIIPYLGPYIGLVPAIFIALSMSFKEVILVIVVCVVVQQIDGNLVYPNVIGKTLDIHPLTIIMILLAAGNIAGLLGMILAIPLYAVSKVVVTYVYDIIKLQNSDTDA	UPF0118 membrane protein YueF
NODE_18_length_25768_cov_99.013911	fig|1578.617.peg.535	6866	7894	+	Glycerol-3-phosphate dehydrogenase [NAD(P)+] (EC 1.1.1.94)	1.1.1.94	atgacaaaaaaaatagcagtattaggtgccggttcgtggggtagtacacttgcgagcgttttaattgaaaatggacatgatgtcacactttacacaaacgttgtcgaacaggcggcagagcttaatgaaaagcatacaaatgaacaatatatgcctggctttaagtattcagaaaaactacgggcaacgacagacttggaagaagctttaactgataccgatgcaattttatttgttgtaccaactaaagtaacacgtttggtggctaaacaagtcaaagaagttttagctaaattaaaacagcgtccaatggtgatccatgccagcaagggactagagatcgggactcataaacggatctcagagatcattcacgaagaattgaccgatcagtattgc…	MTKKIAVLGAGSWGSTLASVLIENGHDVTLYTNVVEQAAELNEKHTNEQYMPGFKYSEKLRATTDLEEALTDTDAILFVVPTKVTRLVAKQVKEVLAKLKQRPMVIHASKGLEIGTHKRISEIIHEELTDQYCSSIVVLSGPSHAEEVARHDITLITAASEEEKAAKQVQDMFTNNYLRIYTNTDVVGVETGAAFKNVIAIGAGILHGLGYGDDAKAALMTRGLAEVARLGMAYGASPLTFMGLSGVGDLIVTCTSVHSRNWRCGDQLGQGKPLDEVIEDMGMVIEGINTAKAAYDLSREEHIEMPITEAIYNVLYNKADIKEEIGSLMTRDSKSEVIGKRK	Glycerol-3-phosphate dehydrogenase [NAD
NODE_18_length_25768_cov_99.013911	fig|1578.617.peg.536	8383	7946	-	Teichoic acid glycosylation protein		ttgaaaaaattctatcgtaaatatcaaaacttctttgcttatactttctttgggaccttagctagtgctatcaatgttgtcttattccatattttggaaaaagatcttggttttaactacttgatagctaactgcttagcttatatcgttgcgatcatttttactttcgtgaccaataaacattgggtctttgcttctaaaaatacgccctttaaacagaccctccaagaatttgcttcattttgtaatgttcggctcttctcgtttatcttggatattgggctgatgtttaccggtgtgcaactcttagccctctataaagatctcgccaaaatactcgatcaactcatctgtggtatcttgaattacttctttagtaagtggttcatcttcaaaacg…	MKKFYRKYQNFFAYTFFGTLASAINVVLFHILEKDLGFNYLIANCLAYIVAIIFTFVTNKHWVFASKNTPFKQTLQEFASFCNVRLFSFILDIGLMFTGVQLLALYKDLAKILDQLICGILNYFFSKWFIFKTTAKILPKETSEE	Teichoic acid glycosylation protein
NODE_18_length_25768_cov_99.013911	fig|1578.617.peg.537	8626	10065	+	hypothetical protein		atggcaaaaatagaaatcaaatatattactaagagcgtgccgttgctcctagataaaaaagaaaaacatgatacgaaaaacttttgggaattacgcgggatcgatctggctgtaaatgccggtgaagcagtcggggtgatcggtgataacggctcaggcaaagcagccttgatgaagatcttaggacaaaaagacagacaaacaacgggctttatcacgactaaggccaaaagatcttatgcttcgtgtacgagtttagatccagaaaagaccggacttgaaaatattcgccaagcgatcgcacaagctgacattgatgaattcaagggtaaccattatacgaacgggatcatcaatttttctgaggtcggtgaattattgtatcgtcccgttaaagag…	MAKIEIKYITKSVPLLLDKKEKHDTKNFWELRGIDLAVNAGEAVGVIGDNGSGKAALMKILGQKDRQTTGFITTKAKRSYASCTSLDPEKTGLENIRQAIAQADIDEFKGNHYTNGIINFSEVGELLYRPVKEYSTGMYARLALSIVLFIDPELVILDEVLSPVDRNFYFKAVQKIQQLKDTGVTFIVSEVRPVIIETLCERTALLQFGVLQDFGATTEVIRQYEYACEWVANLTLPEKNDYLAEKQAEQVNFDINKVYEVFKSEQFKHGYTRKDEPRMRKEFFVERGNDPVQREKTTQTNKTAKRVDSKVILALLALVALVFLGGFWYQKTQASNATKAKENSASIAKVNSQRKASSLSQSKTKALSAKEASQKAASESAQKAAEESQRKQEEASKQA…	hypothetical protein
NODE_18_length_25768_cov_99.013911	fig|1578.617.peg.538	10093	11349	+	Hemolysins and related proteins containing CBS domains		atgggatcagatcctggacagcccctgttatgggcaatgagcgcattgatcgcagtcgttttatttagcttaaatgtaattggggagcaggcattacgtcaaagtacggaggcgcaaaaagaaagtctaaattatcgggctaacggttggatcgcagcctattttagcaagatcgcatttggtttcttagccatggctagtatcacacagatcgtcagtggtacttggaagctcatggtcttgatcgtcttagtcgtggtcttgatcggatcagaatttggcttagctagcaaagtgacggtcgaaaatagtggtttattgtgccaaaagttagggtggttactcaaacttgaaaatgtgatcttatggccacttactaaggtagtcacgttagttcag…	MGSDPGQPLLWAMSALIAVVLFSLNVIGEQALRQSTEAQKESLNYRANGWIAAYFSKIAFGFLAMASITQIVSGTWKLMVLIVLVVVLIGSEFGLASKVTVENSGLLCQKLGWLLKLENVILWPLTKVVTLVQQKGQIAGPTEMSLETIVENIQRQRKESELDTADFEMINGVLSLHDKTAREVMVPRIDAFMIDITNDNDRNIDSILEMDYSRIPVYHEDKDNIVGIVHIKNVLKRARRYGFERLTIRQVMHPAFFVPETMPVDELLLQMQKTQNQMAILLDEYGGVVGLTTLEDILEEIVGEIEDESDEPDRLIEQVAENEFIVQGKMTLTEFNDEFGTKLEMDDIDTVAGYIIAKTGKIPDDDEVLTVTKDDGLVLKTVEIVDDARITKVLAVIPP…	Hemolysins and related proteins containing CBS domains
NODE_18_length_25768_cov_99.013911	fig|1578.617.peg.539	11472	13049	+	Peptide chain release factor 3		atgaaaacagatgaattaaaacaagccgttgaaaaaagacggacctttgcgatcatttctcaccctgacgcgggtaagacaacgatcacagaacaattgctcttgtttgggggcgtcgttcgccaagctgggacagttaaagccaaaaaaagtggtaattttgctaaatctgactggatggagatcgaaaagaaacgtgggatctcagttacgagttcggtcatgcaatttgactatgccggcaagcgcgttaatatccttgatacccctgggcatgaagacttttccgaagatacgtatcgtacattgatggcagtcgattcagcggtgatggtgatcgactcagctaaagggatcgagccgcaaactaaaaaacttttccaaatttgtaaaatgcgg…	MKTDELKQAVEKRRTFAIISHPDAGKTTITEQLLLFGGVVRQAGTVKAKKSGNFAKSDWMEIEKKRGISVTSSVMQFDYAGKRVNILDTPGHEDFSEDTYRTLMAVDSAVMVIDSAKGIEPQTKKLFQICKMRGIPIFTFINKLDRDGREPLELTAELEEVLGIDAYAMNWPIGMGKGLKGIYDIYNDRIELYRSEADGQKFLELDENGEIKGDDPLKEDSIYQQVLEEVELVKDAGNEFDEEKIANGQLTPVFFGSALTNFGVKTFLDAYLQFAPAPTAHKTQAGGEIKPANPTFSGFIFKIQANMNPNHRDRIAFVRICSGEFDRGMDVFLNRTGKKIRLSNSTQFMADTRETVETAVAGDIIGLYDTGNFQIGDTIYTGKKAIEFEKLPQFTPELF…	Peptide chain release factor 3
NODE_18_length_25768_cov_99.013911	fig|1578.617.peg.540	14293	13142	-	hypothetical protein		ttggcaccgaaaagacaaaaaaagacaaaacatccaaataataaaaaacaccggtcgcgctttgctaagcgttctaaaatcgaaatagctccaatcaaagaagcattgctcgaggaacaaccagagatcgagatcgaaaaaactgcgccagctcagcaacctatcgccccggcgccaccactaaaaaaagaagcagagatcgtattagaccaaaaacaagcggtcacgactaaaaatgagctcaagaaaaaagccactacacaggattcgactgtcatcttgctcttccaagatgaagacaagaaattcttagcttcaccgcagatcatttcgggtaagcgtcacgaaccgatcaaattcagattcaaagattttgaaggttataatttgatccaagtc…	MAPKRQKKTKHPNNKKHRSRFAKRSKIEIAPIKEALLEEQPEIEIEKTAPAQQPIAPAPPLKKEAEIVLDQKQAVTTKNELKKKATTQDSTVILLFQDEDKKFLASPQIISGKRHEPIKFRFKDFEGYNLIQVDGFTSDFVLPYAAITFTYRKKDAGNIWIFCQDIDDRRFLQKPTFIKGKVGDEFSLSSPAIRNYTLLRARGLTHGIFTYDQQAVTYFYRRDSWKDVDYTPHYLKFKQSLPCLDAPDGQVTDVILAKNTIWQTFETIITTNDQRWYCLGGSIWIKYDAELMTMLDKKPAVISEHDTLEIDLPHSIDLRHNAMIDFIPDGELVLYDKPFGQKVGLIKNGQIVTLTGRIRVEGMLWFEVNGLGWTIREYLNLDP	hypothetical protein
NODE_18_length_25768_cov_99.013911	fig|1578.617.peg.541	14714	14439	-	FIG00743758: hypothetical protein		atgcaactgatcgatgttaccaatagttactctcgcatgatccaacatgaattagttaaatcaccagttcatttcatcaaagtgtataccctagggaattcaaaagtcgtctataagaaaaagcatgctttttctgagatcgtcatctcaaacaaaattcgtcagatcacccctaaagaaattgaatttgttaaaactaagcttttaaaagaccgtgccgacgctgcgactgttacttctcaaggaaacttagtggaaataaatttggagaactaa	MQLIDVTNSYSRMIQHELVKSPVHFIKVYTLGNSKVVYKKKHAFSEIVISNKIRQITPKEIEFVKTKLLKDRADAATVTSQGNLVEINLEN	FIG00743758: hypothetical protein
NODE_18_length_25768_cov_99.013911	fig|1578.617.peg.542	17029	14867	-	ATP-dependent Clp protease, ATP-binding subunit ClpE		atgttatgccaaaattgtcagcaaaaccatgctacgctacatttaacaacaaacatcaacggtcgccaaacttcgatcgacctttgtcctaactgctatcgagctttgaaaaatcaaagtcaactaccaccttccttggatggtatcttccaagatccattgggtagtgatccattcgctgatttctttaaagagatcaaacgccaaaaccaacagcgtcccacaccagcgcaaggtccccaaacaaaaggcggagataatagtgataacgaaggcattttagataaatatgggcttgatctcactgcccaagccaaagcgggccagatcgacccagttatcgggcgtgaccgcgagataaaacgtgtaactgagatcttgaatcggcgcactaaaaac…	MLCQNCQQNHATLHLTTNINGRQTSIDLCPNCYRALKNQSQLPPSLDGIFQDPLGSDPFADFFKEIKRQNQQRPTPAQGPQTKGGDNSDNEGILDKYGLDLTAQAKAGQIDPVIGRDREIKRVTEILNRRTKNNPVLTGEAGVGKTAVVEGLAQKIVDGDVPQKLLNKKVIRLDVVSLVQGTGIRGQFEQRMQELMDELKQKQDIILFIDEIHEIVGAGNAEGGMDAGNVLKPALARGEFQLVGATTLNEFRTIEKDAALARRLQPVQVEEPSKEEALAILHGLRAKYESYHQVAYTDEALESAIQLSTRYIQDRYLPDKAIDLLDEAGSRKNLALQAFDPSEVKAKIAQAQTNKKAALDQEDYEKAAFYRDQVAKLEEHLTAKPQVKSEVTAQDMEKI…	ATP-dependent Clp protease, ATP-binding subunit ClpE
NODE_18_length_25768_cov_99.013911	fig|1578.617.peg.543	17182	17370	+	hypothetical protein		atggaaaaggattatcaaacattattagatcgcttgcatgcaggtgagataacagaattcgagatcgaaacagctgaatttatggattttcaaaagattttactaaattataattatcggaaaaatgtggtcggcacagctaaacgtggtggcggagttatctatcattatcacaaaaatgataaataa	MEKDYQTLLDRLHAGEITEFEIETAEFMDFQKILLNYNYRKNVVGTAKRGGGVIYHYHKNDK	hypothetical protein
[truncated: 2,142 more rows]
