# Supplementary material for: Respiratory tissue-associated commensal bacteria offer therapeutic potential against pneumococcal colonization
Source: eLife. 2020 Dec 8;9:e53581. doi: 10.7554/eLife.53581 (PMC7723408; doi:10.7554/eLife.53581)
Supplement: Supplementary file 3. — Sheet 1 (whole list) contains all hits sorted by the ratio of the average signal (arbitrary units) from two runs for L. murinus conditioned medium (LmCM) over fresh medium (FM). Sheet two lists the hits with an AVG (LmCM)/AVG (FM) >10 fold. Sheet three lists the hits with an AVG E. coli conditioned medium (EcCM)/AVG (LmCM) <10 fold. Sheet 4 (short list) contains only hits that are present in sheet 2 and 3. Sheet five lists identified metabolites based on their masses and retention times compared to authentic reference standards run in-house under the same analytical setup. Score (arbitrary units) indicates the goodness of the overall matching between the experimental properties of each feature and those obtained for the corresponding standard, as calculated by Progenesis QI. Mass error express the relative mass difference (ppm) between the masses of the feature and the reference standard. Isotope similarity (%) corresponds to the matching of the isotopic profile of the feature and the reference standard. [file elife-53581-supp3.xlsx]

## Sheet: whole list
Table S3
Feature	FM	FM'	AVGFM	LmCM	LmCM'	AVGLmCM	EcCM	EcCM'	AVGEcCM	AVGLmCM/AVGFM	AVGEcCM/AVGFM
AHI#1.60_351.0378m/z	0	0	0	60.756	135.348	98.0518	9.02888	0	4.51444	#DIV/0!	#DIV/0!
AHI#4.28_399.0847m/z	0	0	0	44.6675	42.5844	43.6259	23.6137	24.4847	24.0492	#DIV/0!	#DIV/0!
RPP#12.66_791.6233m/z	0	0	0	0	9.359	4.6795	41.7842	13.3163	27.5503	#DIV/0!	#DIV/0!
ZHI#4.86_287.0208m/z	0	0	0	19.2336	12.976	16.1048	312.25	224.272	268.261	#DIV/0!	#DIV/0!
ZHI#4.86_387.9510m/z	0	0	0	4.05134	2.61348	3.33241	44.7193	73.3335	59.0264	#DIV/0!	#DIV/0!
ZHI#4.88_824.2483m/z	0	0	0	10.1138	3.13815	6.62596	278.194	237.794	257.994	#DIV/0!	#DIV/0!
ZHI#4.99_493.0631m/z	0	0	0	0.299088	0	0.149544	280.897	221.36	251.129	#DIV/0!	#DIV/0!
ZHI#5.42_134.1074m/z	0	0	0	1163.45	1160.64	1162.05	2.42313	2.58656	2.50484	#DIV/0!	#DIV/0!
ZHI#5.58_553.3353m/z	0	0	0	67.4848	70.6454	69.0651	47.6761	86.6456	67.1608	#DIV/0!	#DIV/0!
ZHI#5.76_355.0272m/z	0	0	0	4.47448	0	2.23724	734.728	680.632	707.68	#DIV/0!	#DIV/0!
ZHI#5.81_313.0164m/z	0	0	0	8.95368	43.5307	26.2422	183.766	232.435	208.101	#DIV/0!	#DIV/0!
ZHI#6.58_546.0560m/z	0	0	0	116.969	145.518	131.244	9.00298	0	4.50149	#DIV/0!	#DIV/0!
ZHI#6.73_337.0128m/z	0	0	0	212.62	175.796	194.208	0	1.46915	0.734576	#DIV/0!	#DIV/0!
ZHI#6.76_330.9968m/z	0	0	0	101.636	115.092	108.364	0	3.18859	1.5943	#DIV/0!	#DIV/0!
ZHI#7.50_223.1081m/z	0	0	0	3.71358	0	1.85679	46.3868	51.8841	49.1354	#DIV/0!	#DIV/0!
ZHI#7.71_414.5471m/z	0	0	0	22.9811	24.3761	23.6786	224.613	254.359	239.486	#DIV/0!	#DIV/0!
ZHI#8.61_554.1128m/z	0	0	0	10.4758	6.51045	8.49313	2465.99	2187.63	2326.81	#DIV/0!	#DIV/0!
ZHI#8.99_416.9370m/z	0	0	0	65.6537	50.9753	58.3145	10.3683	20.6296	15.499	#DIV/0!	#DIV/0!
AHI#1.39_509.8756m/z	1.1e-07	1e-07	1.05e-07	198.774	174.071	186.422	1.1e-07	1e-07	1.05e-07	1.77545e+09	1
ZHI#6.68_438.0759m/z	1.1e-07	1e-07	1.05e-07	40.5009	19.7188	30.1099	1.1e-07	1e-07	1.05e-07	2.86761e+08	1
AHI#3.02_251.0220m/z	0.00302166	0	0.00151083	106.641	71.1682	88.9045	0	0.000105482	5.2741e-05	58844.9	0.0349087
ZHI#9.48_258.0383m/z	0	0.012438	0.00621901	160.399	209.58	184.99	0	0.0603197	0.0301599	29745.9	4.84963
ZHI#6.07_160.0433m/z	0.0594849	0	0.0297425	141.262	133.098	137.18	697.783	622.118	659.951	4612.26	22188.8
ZHI#6.63_419.0485m/z	0.0044379	1.70523	0.854834	2592.78	2569.98	2581.38	0	0	0	3019.74	0
ZHI#6.63_307.0348m/z	41.5224	43.0496	42.286	14620.4	14850.8	14735.6	94.7511	44.1993	69.4752	348.475	1.64298
ZHI#1.55_331.0184m/z	3.51252	0	1.75626	596.533	547.82	572.177	10.9278	0	5.46391	325.793	3.11111
ZHI#6.71_610.0895m/z	1.19153	0	0.595767	191.163	151.828	171.496	0	0	0	287.857	0
AHI#1.25_173.9612m/z	8.09816	6.96008	7.52912	1647.09	1575.32	1611.21	18.8541	10.6922	14.7731	213.997	1.96213
ZHI#5.60_491.0402m/z	0	0.100662	0.0503312	12.9005	8.12831	10.5144	363.862	303.885	333.874	208.904	6633.53
AHI#1.20_267.9643m/z	24.5338	16.5543	20.544	4384.14	4163.45	4273.8	67.3902	42.8663	55.1283	208.031	2.68342
AHI#1.20_262.9856n	131.278	126.616	128.947	27040	26566.8	26803.4	152.044	158.184	155.114	207.864	1.20293
ZHI#7.60_221.0452m/z	0.000397949	0.00161569	0.00100682	0.410378	0	0.205189	130.543	96.8711	113.707	203.799	112937
ZHI#5.42_134.3088m/z	72.7695	0	36.3848	6083.99	6296.91	6190.45	1.29209	3.23715	2.26462	170.138	0.0622408
ZHI#6.84_286.9689m/z	1.56353	0.53563	1.04958	155.04	174.482	164.761	0	5.64888	2.82444	156.977	2.69102
ZHI#8.89_565.0478m/z	7.65655	15.0021	11.3293	1611.17	1797.34	1704.25	136.229	101.238	118.734	150.428	10.4802
ZHI#6.68_662.1030m/z	0	1.37925	0.689623	94.408	101.032	97.7197	2.88901	14.0463	8.46768	141.7	12.2787
ZHI#6.60_425.0655m/z	37.4957	48.4545	42.9751	5791.76	5902.07	5846.92	38.181	95.7008	66.9409	136.054	1.55767
AHI#2.10_244.9751n	534.826	478.706	506.766	64080	66846.9	65463.5	756.654	667.877	712.266	129.179	1.40551
ZHI#6.71_684.1373m/z	0	2.95947	1.47973	179.705	200.69	190.197	4.15845	0	2.07923	128.535	1.40514
ZHI#2.55_436.2547m/z	9.68187	0.0586569	4.87026	462.876	564.769	513.822	332.888	400.802	366.845	105.502	75.3234
ZHI#8.89_603.0039m/z	0.527072	5.3227	2.92488	312.712	268.562	290.637	2.79132	50.9231	26.8572	99.367	9.18231
AHI#2.10_173.9612m/z	37.751	26.2794	32.0152	3080.1	3272.26	3176.18	91.5454	69.7007	80.623	99.2086	2.51828
ZHI#6.76_355.0761m/z	6.0516	0.65064	3.35112	328.769	290.139	309.454	45.8102	47.5023	46.6563	92.3434	13.9226
AHI#1.95_354.0511m/z	60.1492	37.0212	48.5852	4449.22	4473.32	4461.27	87.468	100.995	94.2315	91.8236	1.93951
ZHI#3.86_249.0169m/z	16.0353	25.618	20.8267	1845.92	1712.8	1779.36	45.1657	9.01e-05	22.5829	85.4367	1.08433
AHI#1.24_199.9764m/z	1.90276	0	0.95138	71.2194	71.6562	71.4378	5.72987	4.00528	4.86757	75.0886	5.11633
ZHI#6.66_613.1892m/z	7.60208	0.195028	3.89856	301.058	228.083	264.57	22.6185	36.2491	29.4338	67.8637	7.54992
AHI#3.14_136.2968m/z	31.2675	8.54502	19.9063	1755.84	870.258	1313.05	12.9096	0	6.45479	65.9616	0.324259
AHI#1.39_267.9642m/z	24.5715	21.0887	22.8301	1499.96	1435.92	1467.94	20.6969	28.108	24.4024	64.2983	1.06887
AHI#1.24_145.9663m/z	1.4283	2.71417	2.07123	113.646	140.024	126.835	5.55303	3.71741	4.63522	61.2366	2.2379
AHI#1.25_199.9535n	101.369	146.493	123.931	7623	7420.51	7521.76	704.304	668.383	686.343	60.6932	5.53812
AHI#1.31_353.0438n	39.9978	41.2814	40.6396	2150.07	2637.29	2393.68	127.394	109.134	118.264	58.9002	2.91007
ZHI#6.60_537.0794m/z	31.9906	23.0681	27.5294	1602.74	1590.12	1596.43	56.5654	29.6309	43.0981	57.9901	1.56553
ZHI#6.60_553.0543m/z	21.4381	21.878	21.658	1162.63	1294.24	1228.43	22.713	5.16528	13.9391	56.7195	0.6436
ZHI#10.02_655.1496m/z	26.3795	44.1104	35.245	1986.65	1951.09	1968.87	50.7437	29.5914	40.1675	55.8624	1.13967
ZHI#6.60_221.0122m/z	707.054	734.521	720.787	40177.2	40285.5	40231.3	1046.4	949.841	998.12	55.8158	1.38476
AHI#2.00_243.9879m/z	13.6232	2.34797	7.98556	412.47	439.262	425.866	3.6697	18.5752	11.1225	53.3296	1.39282
ZHI#6.63_315.0274m/z	5.19935	5.31326	5.2563	244.303	295.89	270.096	0.00470426	6.89192	3.44831	51.3852	0.656033
AHI#1.98_328.0357m/z	17.5347	0.809005	9.17183	407.184	534.855	471.019	12.7262	13.7798	13.253	51.355	1.44497
ZHI#1.14_206.0596n	1129.97	1279.67	1204.82	57066	66018.1	61542.1	2425.78	2500.29	2463.04	51.0799	2.04432
ZHI#6.71_690.1544m/z	0	6.39072	3.19536	156.478	155.651	156.064	6.22475	0	3.11237	48.841	0.97403
AHI#1.03_263.0090m/z	0.323931	4.76683	2.54538	96.3587	138.878	117.618	4.45017	6.35879	5.40448	46.2085	2.12325
ZHI#8.96_514.9137m/z	2.48665	5.34515	3.9159	188.84	172.838	180.839	59.1114	50.5469	54.8292	46.1807	14.0017
AHI#1.22_215.9927m/z	3.42152	4.80513	4.11332	201.71	177.937	189.824	6.88836	5.52982	6.20909	46.1485	1.50951
ZHI#1.27_326.9669m/z	14.4066	15.4136	14.9101	607.713	720.803	664.258	2.61484	4.04442	3.32963	44.5508	0.223313
AHI#1.63_145.9662m/z	1.74009	4.32135	3.03072	129.015	133.648	131.332	4.12157	1.81432	2.96794	43.3334	0.979286
AHI#1.25_511.9316n	15.5953	12.4094	14.0023	599.319	605.247	602.283	73.7094	24.4586	49.084	43.013	3.50541
ZHI#6.73_369.0182m/z	4.48824	5.02191	4.75507	207.841	188.22	198.031	2.74016	4.52074	3.63045	41.6462	0.763489
ZHI#6.63_158.0060n	79.0554	89.0138	84.0346	3578.18	3394.8	3486.49	153.719	149.726	151.722	41.4888	1.80547
AHI#1.25_191.9717m/z	8.34849	6.5686	7.45854	321.132	297.239	309.185	2.79333	15.1452	8.96926	41.4539	1.20255
AHI#1.72_750.8813m/z	4.2773	3.04218	3.65974	168.098	133.13	150.614	25.017	19.3148	22.1659	41.1544	6.05669
ZHI#6.60_547.0383m/z	3.22688	1.6925	2.45969	89.2803	109.779	99.5295	0	0	0	40.4643	0
ZHI#6.60_569.0282m/z	20.6814	0.175102	10.4282	376.769	455.797	416.283	11.5622	41.6578	26.61	39.9188	2.55172
ZHI#6.63_218.0190n	303.657	376.478	340.067	13498.6	13646.9	13572.7	460.288	496.349	478.319	39.9119	1.40654
ZHI#6.66_578.1423m/z	28.4863	24.0068	26.2466	1012.23	1005.93	1009.08	19.4141	39.5368	29.4755	38.4462	1.12302
AHI#2.01_283.9382m/z	54.7901	49.3	52.0451	1902.2	2066.73	1984.46	58.6713	51.8043	55.2378	38.1297	1.06135
ZHI#6.63_420.0515m/z	15.9578	11.2112	13.5845	487.958	539.138	513.548	9.89574	12.92	11.4079	37.804	0.839772
AHI#3.05_381.0370m/z	37.8514	61.064	49.4577	1633.24	2036.12	1834.68	53.1287	69.3116	61.2201	37.0959	1.23783
AHI#1.77_391.0701n	94.2015	54.4112	74.3064	2444.47	3044.77	2744.62	251.141	299.737	275.439	36.9366	3.7068
ZHI#6.63_230.0188n	0.376968	3.41594	1.89646	71.6372	68.1382	69.8877	23.5907	18.1276	20.8591	36.8517	10.999
AHI#1.18_283.9381m/z	34.7368	30.2541	32.4954	1154.94	1178.34	1166.64	69.9872	53.6429	61.8151	35.9017	1.90227
AHI#1.05_215.9929m/z	4.92643	0.0302105	2.47832	112.357	62.2658	87.3116	5.63196	0	2.81598	35.2302	1.13625
AHI#1.95_264.0197m/z	3.93747	32.2636	18.1006	613.971	586.19	600.08	39.6857	26.9978	33.3417	33.1526	1.84203
AHI#1.25_290.9474m/z	2.70859	1.63637	2.17248	68.9728	72.5262	70.7495	6.50444	2.84298	4.67371	32.5662	2.15132
ZHI#8.99_492.9320m/z	7.02447	4.45477	5.73962	177.541	194.046	185.793	71.6387	62.7024	67.1705	32.3703	11.703
AHI#2.15_305.9202m/z	34.3489	30.6523	32.5006	1049.95	1052.22	1051.08	31.4115	44.0223	37.7169	32.3405	1.1605
AHI#2.03_458.0864n	67.196	43.8341	55.515	1695.56	1883.05	1789.3	166.046	193.942	179.994	32.2309	3.24226
AHI#2.12_197.9590m/z	7.24709	5.42373	6.33541	174.234	229.583	201.908	3.00905	5.65893	4.33399	31.8698	0.68409
ZHI#6.81_454.1132m/z	12.902	12.6231	12.7625	366.688	446.301	406.494	0	10.2831	5.14155	31.8506	0.402863
AHI#1.69_339.0283n	154.39	195.71	175.05	5293.44	5441.32	5367.38	162.748	294.933	228.84	30.6619	1.30728
AHI#1.91_420.0616m/z	79.5417	0.439978	39.9908	1275.96	1174.17	1225.06	87.9196	76.9031	82.4113	30.6336	2.06076
ZHI#6.60_441.0398m/z	95.514	105.709	100.612	3033.85	3123.64	3078.75	104.835	107.662	106.249	30.6004	1.05603
AHI#1.22_243.9879m/z	17.5411	26.9449	22.243	664.302	696.119	680.211	35.7211	24.6291	30.1751	30.5809	1.35661
ZHI#0.93_215.0729m/z	43.882	39.7974	41.8397	1178.44	1271.9	1225.17	62.5941	56.3933	59.4937	29.2824	1.42194
AHI#1.69_539.8852m/z	11.7874	1.22701	6.50719	227.691	148.095	187.893	7.64032	13.599	10.6197	28.8747	1.63199
ZHI#5.68_484.0852m/z	6.01692	0	3.00846	59.1255	111.238	85.182	333.783	399.604	366.694	28.3141	121.887
ZHI#0.91_229.0889m/z	29.6373	17.3807	23.509	676.153	651.812	663.982	35.0328	48.0481	41.5405	28.2437	1.767
AHI#1.95_502.0383m/z	17.2695	14.6213	15.9454	466.804	429.371	448.087	60.3459	80.9915	70.6687	28.1014	4.43192
AHI#2.08_218.9887m/z	125.341	106.689	116.015	3187.98	3273.8	3230.89	204.482	219.526	212.004	27.8489	1.82739
AHI#1.76_429.0619m/z	19.7355	9.93542	14.8355	343.998	473.935	408.966	29.26	24.7151	26.9876	27.5668	1.81913
AHI#1.69_338.0412m/z	6.13715	7.203	6.67008	202.383	163.39	182.887	14.2452	0	7.12258	27.419	1.06784
AHI#8.43_223.9718m/z	2.60878	10.8394	6.7241	196.657	168.93	182.794	157.502	172.561	165.031	27.1849	24.5432
AHI#1.34_1002.4658m/z	30.4259	25.4793	27.9526	762.75	731.044	746.897	30.9218	45.288	38.1049	26.7201	1.3632
AHI#11.06_678.8959m/z	9.82102	13.8399	11.8305	314.979	315.254	315.116	22.7522	23.8134	23.2828	26.636	1.96804
ZHI#6.63_594.1163m/z	18.5279	19.7144	19.1212	494.529	518.058	506.293	0	0	0	26.4782	0
AHI#1.20_305.9202m/z	14.4962	18.4779	16.4871	409.56	459.914	434.737	12.1692	22.6809	17.4251	26.3684	1.05689
RPP#1.26_146.0322n	673.128	597.253	635.19	16663.2	16694.6	16678.9	901.547	803.698	852.622	26.2581	1.34231
AHI#8.22_321.9488m/z	1.16464	4.23162	2.69813	67.8913	69.924	68.9076	11.8636	7.64691	9.75527	25.539	3.61556
AHI#2.15_289.9463m/z	92.3305	103.19	97.7603	2468.65	2456.1	2462.38	114.966	98.838	106.902	25.1879	1.09351
ZHI#6.60_187.0416m/z	1066.96	1125.13	1096.04	26918.1	27588.8	27253.4	1341.06	1254.75	1297.91	24.8653	1.18418
ZHI#6.63_447.0486m/z	3.08799	0	1.544	34.7765	41.5989	38.1877	0	0	0	24.733	0
ZHI#6.63_202.0453n	4636.67	5327.82	4982.25	120256	121109	120683	7221.4	7273.44	7247.42	24.2225	1.45465
AHI#1.62_179.9481m/z	13.6378	11.8638	12.7508	305.08	303.328	304.204	21.4519	32.6237	27.0378	23.8577	2.12048
ZHI#6.58_423.1014m/z	17.3864	16.1933	16.7898	384.758	409.748	397.253	50.1	54.5903	52.3451	23.6603	3.11767
AHI#1.69_377.9912m/z	6.01017	10.2157	8.11294	176.16	206.802	191.481	10.7914	12.8114	11.8014	23.602	1.45464
AHI#2.24_366.0391n	116.062	211.967	164.015	3515.57	4180.41	3847.99	118.361	207.091	162.726	23.4612	0.992142
AHI#3.45_589.1563m/z	39.0919	7.70639	23.3991	522.459	573.008	547.734	154.36	140.094	147.227	23.4083	6.292
ZHI#5.78_334.9986m/z	2.81517	2.40408	2.60962	60.2693	60.4079	60.3386	498.174	495.436	496.805	23.1216	190.374
ZHI#2.47_221.9901m/z	67.0369	67.7049	67.3709	1551.03	1504.67	1527.85	765.598	663.496	714.547	22.6782	10.6062
ZHI#6.84_420.2975m/z	3.61408	3.67544	3.64476	74.1192	89.3	81.7096	10.0461	3.65721	6.85167	22.4184	1.87987
ZHI#5.65_470.9334m/z	2.60231	0	1.30116	26.878	31.2616	29.0698	161.057	169.054	165.055	22.3415	126.853
AHI#2.98_124.0392m/z	4401.26	5713.28	5057.27	97158.4	126902	112030	8803.68	10468.4	9636.04	22.1523	1.90539
ZHI#5.65_558.9485m/z	1.11826	0	0.55913	15.9412	8.71697	12.3291	381.622	337.297	359.459	22.0505	642.89
AHI#1.32_848.3226n	240.416	230.134	235.275	5939.01	4265.21	5102.11	293.024	277.245	285.135	21.6857	1.21192
ZHI#5.01_379.0051m/z	0.105742	0	0.0528708	0	2.26019	1.1301	1494.45	1271.32	1382.89	21.3747	26155.9
AHI#1.76_753.1977m/z	0.445311	18.3323	9.3888	164.502	229.826	197.164	36.1312	23.1929	29.6621	20.9999	3.1593
AHI#1.01_174.9697n	11.4441	11.5636	11.5039	233.781	244.685	239.233	27.4855	29.1639	28.3247	20.7958	2.46219
AHI#1.74_472.1022n	213.515	158.753	186.134	3624.76	4053.19	3838.97	382.71	524.353	453.532	20.6248	2.43659
ZHI#5.68_393.9730n	7.4441	8.32231	7.88321	159.311	161.687	160.499	1049.47	984.017	1016.74	20.3596	128.976
ZHI#6.58_494.0962m/z	0	25.2327	12.6163	252.037	258.183	255.11	39.4731	53.5237	46.4984	20.2206	3.68557
AHI#1.77_316.9958n	37.2631	33.7969	35.53	723.261	700.455	711.858	53.1906	61.6861	57.4383	20.0354	1.61662
ZHI#6.76_448.0550n	22.8961	21.4837	22.1899	467.146	417.038	442.092	75.8476	66.0445	70.9461	19.9231	3.19722
AHI#2.65_173.0419m/z	556.388	521.045	538.716	10687.9	10746.2	10717	135.321	227.333	181.327	19.8937	0.336591
AHI#1.95_466.0651m/z	17.3157	47.9166	32.6161	643.537	651.108	647.323	54.7835	47.6629	51.2232	19.8467	1.57049
ZHI#5.65_454.9589m/z	8.47769	3.35759	5.91764	120.772	112.264	116.518	897.734	810.932	854.333	19.69	144.371
AHI#3.29_838.0972m/z	5.09321	16.6666	10.8799	183.989	239.432	211.711	37.4662	64.8987	51.1825	19.4588	4.7043
AHI#1.34_958.4398m/z	58.4089	59.7652	59.087	1208.74	1088.56	1148.65	74.202	60.5438	67.3729	19.4399	1.14023
AHI#2.00_339.0283n	275.664	270.145	272.904	5462.94	5110.31	5286.62	479.272	555.646	517.459	19.3717	1.89612
AHI#1.88_448.0582m/z	301.572	320.521	311.046	5799.41	6205.1	6002.25	1086.69	1210.91	1148.8	19.297	3.69335
ZHI#5.65_307.0048m/z	3.76358	19.3551	11.5593	229.761	203.233	216.497	2089.79	1992.07	2040.93	18.7292	176.561
AHI#1.65_706.8546m/z	14.9486	13.9423	14.4454	277.43	262.54	269.985	35.5922	25.6373	30.6147	18.69	2.11933
AHI#1.36_980.4019n	222.781	177.291	200.036	3694.41	3743.64	3719.03	214.474	200.644	207.559	18.5918	1.03761
AHI#1.22_353.0242m/z	6.07069	7.15346	6.61208	133.113	110.561	121.837	8.30632	15.3299	11.8181	18.4264	1.78735
AHI#1.36_199.9763m/z	4.01663	0.583003	2.29982	47.4957	37.1834	42.3395	2.68382	0	1.34191	18.41	0.583486
AHI#2.08_191.9717m/z	62.3064	63.1156	62.711	1081.77	1145.09	1113.43	83.8596	74.5768	79.2182	17.7549	1.26323
AHI#1.24_394.9800m/z	12.6078	11.5296	12.0687	201.123	221.259	211.191	34.4712	18.3921	26.4317	17.4991	2.19011
AHI#1.77_430.0330m/z	8.05912	12.5322	10.2957	231.408	127.777	179.592	4.2194	8.92999	6.5747	17.4435	0.638588
ZHI#8.99_394.9549m/z	35.7022	37.687	36.6946	651.713	621.579	636.646	242.367	220.622	231.494	17.3498	6.30867
AHI#1.39_305.9200m/z	2.3762	8.53076	5.45348	98.1561	90.5665	94.3613	13.0653	12.7229	12.8941	17.303	2.36438
AHI#1.05_178.9409n	11.5574	11.2502	11.4038	196.282	189.269	192.775	78.4337	66.4701	72.4519	16.9045	6.35332
AHI#1.25_460.0303m/z	29.7444	13.6999	21.7222	325.572	398.257	361.914	51.9349	92.4629	72.1989	16.661	3.32374
ZHI#5.55_283.0127m/z	14.5229	0	7.26146	150.747	89.3919	120.07	102.53	96.782	99.6558	16.5352	13.7239
AHI#1.82_444.0837m/z	0	25.5599	12.78	194.541	226.625	210.583	40.1411	51.3977	45.7694	16.4776	3.58134
AHI#3.29_274.0049m/z	8.10781	5.09263	6.60022	95.9864	121.458	108.722	11.0995	11.921	11.5103	16.4725	1.74392
AHI#3.05_516.0913m/z	324.928	234.139	279.533	4558.25	4618.41	4588.33	413.659	432.461	423.06	16.4143	1.51345
ZHI#3.88_238.9886m/z	45.2697	16.6443	30.957	498.392	513.538	505.965	77.6302	79.4687	78.5494	16.3441	2.53737
AHI#2.91_173.0208m/z	15.0855	19.2651	17.1753	300.61	258.873	279.741	31.3345	10.9501	21.1423	16.2874	1.23097
AHI#1.55_451.9980m/z	1.98336	22.7533	12.3683	160.251	239.785	200.018	15.7192	4.44414	10.0817	16.1718	0.815122
ZHI#7.22_310.1144m/z	127.366	93.6031	110.484	1779.11	1781.56	1780.33	91.1575	109.967	100.562	16.1139	0.910192
AHI#1.91_446.0113m/z	16.9866	8.78999	12.8883	270.953	141.61	206.282	13.6148	8.59919	11.107	16.0053	0.861787
AHI#2.03_368.0548n	67.1953	97.2141	82.2047	1251.17	1365.99	1308.58	82.9465	105.638	94.2922	15.9185	1.14704
ZHI#6.60_353.0443m/z	9.68698	10.4144	10.0507	184.51	133.866	159.188	20.8473	23.112	21.9796	15.8385	2.18687
ZHI#2.73_138.1285m/z	29.7621	37.6335	33.6978	513.459	536.533	524.996	347.358	336.394	341.876	15.5795	10.1453
AHI#2.24_457.0780m/z	176.335	237.705	207.02	2974.95	3387.76	3181.35	340.117	302.403	321.26	15.3674	1.55183
AHI#12.65_339.0141m/z	3.42804	2.63279	3.03041	39.5886	53.394	46.4913	7.98604	16.6678	12.3269	15.3416	4.06773
ZHI#6.58_319.0106m/z	7.90578	7.46361	7.68469	120.61	113.22	116.915	5.13676	10.2679	7.70235	15.214	1.0023
AHI#1.24_482.0105m/z	13.4658	9.49201	11.4789	176.003	173.194	174.598	8.72562	32.4835	20.6045	15.2103	1.79499
AHI#1.05_307.9564m/z	13.4236	2.12713	7.77534	137.649	97.266	117.457	9.26598	10.8207	10.0433	15.1064	1.29169
ZHI#6.71_241.0302m/z	8.60867	5.15927	6.88397	105.619	100.753	103.186	14.4105	4.70346	9.55698	14.9893	1.38829
ZHI#3.91_117.0341m/z	77.1737	82.6664	79.92	1180.47	1204.1	1192.29	104.889	49.6602	77.2746	14.9185	0.966899
AHI#1.31_914.4140m/z	85.9992	90.1869	88.0931	1439.61	1183.1	1311.36	125.017	67.3914	96.2042	14.886	1.09207
AHI#1.53_455.0759n	142.332	112.131	127.232	1766.86	1923.23	1845.04	292.233	243.07	267.652	14.5015	2.10366
AHI#1.12_528.0817m/z	93.1858	116.29	104.738	1592.91	1423.95	1508.43	163.46	151.981	157.721	14.402	1.50586
AHI#1.98_199.9766m/z	14.747	10.4799	12.6134	188.112	174.525	181.318	21.0052	10.4934	15.7493	14.375	1.24861
ZHI#6.71_509.0277m/z	7.36439	4.92359	6.14399	103.226	72.1957	87.7108	14.2003	15.1563	14.6783	14.2759	2.38905
AHI#1.67_265.9698m/z	0	5.86424	2.93212	49.2309	33.9051	41.568	2.16081	2.61637	2.38859	14.1768	0.81463
AHI#3.24_291.9285m/z	1.69834	5.31297	3.50565	44.2574	53.6254	48.9414	4.46696	5.71172	5.08934	13.9607	1.45175
ZHI#6.68_397.0136m/z	12.476	2.98238	7.72917	95.8412	118.16	107.001	3.62281	7.3804	5.50161	13.8438	0.711798
AHI#1.84_372.0119m/z	8.75556	18.805	13.7803	202.714	177.454	190.084	25.6517	2.69617	14.1739	13.7939	1.02856
AHI#1.03_1001.5721m/z	8.8247	31.1809	20.0028	272.879	277.476	275.177	19.0884	41.7634	30.4259	13.757	1.52108
AHI#3.45_301.0860m/z	1.57116	12.3797	6.97541	141.501	49.4989	95.4998	135.462	75.0071	105.235	13.6909	15.0865
AHI#1.20_127.9555m/z	4.44204	6.85748	5.64976	70.9512	82.8914	76.9213	7.82279	9.75131	8.78705	13.615	1.5553
AHI#2.34_363.0380n	19.1434	34.1449	26.6442	326.965	392.212	359.589	77.5503	21.8506	49.7004	13.496	1.86534
AHI#1.74_517.0736m/z	36.5328	49.0568	42.7948	526.856	627.072	576.964	83.0162	134.87	108.943	13.4821	2.54571
AHI#2.19_189.0157m/z	6.45828	0	3.22914	40.7045	46.0197	43.3621	12.2849	8.95458	10.6197	13.4284	3.28872
ZHI#6.55_327.0604m/z	9.99521	20.0688	15.032	206.804	191.211	199.008	19.9915	15.8014	17.8964	13.2389	1.19055
AHI#3.07_588.9024m/z	30.6584	29.1505	29.9045	474.188	312.887	393.538	40.987	29.5066	35.2468	13.1598	1.17865
AHI#1.69_284.9396m/z	7.8652	13.1802	10.5227	125.812	149.416	137.614	4.01838	2.29378	3.15608	13.0778	0.299931
AHI#3.07_371.0411m/z	196.05	252.925	224.488	2854.95	2963.12	2909.04	83.2008	107.838	95.5195	12.9586	0.4255
AHI#1.93_397.0946m/z	154.772	119.243	137.008	1811.34	1738.46	1774.9	206.831	221.5	214.165	12.9547	1.56316
ZHI#6.58_568.0471m/z	35.5404	31.1548	33.3476	442.952	408.682	425.817	38.0911	38.7249	38.408	12.769	1.15175
AHI#1.67_560.1158m/z	30.2468	0	15.1234	200.245	180.702	190.473	32.7944	64.4817	48.6381	12.5946	3.21608
ZHI#3.94_339.0211m/z	13.7678	95.1058	54.4368	686.852	680.255	683.553	283.887	194.884	239.385	12.5568	4.39749
ZHI#6.63_572.1246m/z	48.6322	51.1856	49.9089	662.782	588.061	625.422	51.344	58.0689	54.7064	12.5313	1.09612
AHI#1.05_283.9316n	8.64659	10.576	9.6113	124.798	113.986	119.392	13.9495	5.40456	9.67705	12.422	1.00684
AHI#3.07_318.0406m/z	7.4982	22.3838	14.941	201.548	169.455	185.501	12.9879	9.46132	11.2246	12.4156	0.751263
AHI#1.29_852.3538n	159.113	126.661	142.887	1905.89	1629.74	1767.82	144.296	139.108	141.702	12.3721	0.991704
AHI#3.00_199.0298n	50.8997	22.34	36.6199	412.443	493.102	452.773	64.4477	67.2725	65.8601	12.3641	1.79848
AHI#8.60_192.0241m/z	8.65282	7.9659	8.30936	107.644	97.6191	102.631	93.9237	105.651	99.7874	12.3513	12.009
ZHI#6.58_629.1093n	21.6547	52.2626	36.9586	435.301	477.19	456.245	26.4932	13.9919	20.2426	12.3448	0.547709
ZHI#6.68_619.2072m/z	48.0998	53.0065	50.5531	614.136	630.904	622.52	4.51533	50.096	27.3057	12.3142	0.540138
AHI#1.27_175.9765m/z	7.29173	1.53508	4.41341	57.3556	50.7285	54.0421	11.9025	6.60809	9.25528	12.245	2.09708
ZHI#1.55_154.0143m/z	2209.53	2188.85	2199.19	26401.9	27049.8	26725.8	1629.62	1736.15	1682.88	12.1526	0.765229
ZHI#6.68_381.0391m/z	28.946	61.0893	45.0177	532.157	561.678	546.918	53.8464	78.2084	66.0274	12.149	1.4667
AHI#1.98_415.0214m/z	1.69959	6.90966	4.30463	57.7844	46.575	52.1797	70.2143	89.6331	79.9237	12.1218	18.5669
RPP#1.19_136.0617m/z	5568.18	5496.76	5532.47	66421.5	67060.2	66740.9	1311.33	1266.77	1289.05	12.0635	0.232998
AHI#3.09_395.0601n	82.5449	65.6268	74.0858	882.23	890.547	886.388	160.78	155.816	158.298	11.9643	2.13669
ZHI#6.63_706.1318m/z	17.4343	28.1368	22.7855	277.011	267.828	272.42	114.948	126.468	120.708	11.9558	5.29757
AHI#2.33_199.9766m/z	0.980554	5.66203	3.32129	36.3285	42.4902	39.4094	8.01066	4.57091	6.29079	11.8657	1.89408
AHI#2.65_189.0156m/z	11.544	17.289	14.4165	187.748	153.878	170.813	18.7466	6.87299	12.8098	11.8485	0.888552
ZHI#6.50_140.1077m/z	67.333	67.2709	67.3019	790.51	795.911	793.211	36.0348	34.4192	35.227	11.7859	0.523417
AHI#12.32_331.5543n	90.1697	104.114	97.1419	1064.67	1214.84	1139.75	131.914	94.2665	113.09	11.7329	1.16417
AHI#2.00_201.9927m/z	5.35282	2.35743	3.85513	55.4385	34.7749	45.1067	64.3454	53.8649	59.1052	11.7004	15.3316
ZHI#6.60_218.9820m/z	250.585	235.267	242.926	2869.28	2812.62	2840.95	362.181	347.255	354.718	11.6947	1.46019
ZHI#6.78_699.5052m/z	6.76425	2.99017	4.87721	59.9354	54.0812	57.0083	4.19585	0	2.09793	11.6887	0.430149
AHI#1.20_791.1285m/z	5.48974	41.1002	23.2949	262.241	281.536	271.889	37.6214	35.2056	36.4135	11.6716	1.56315
AHI#1.05_266.9647n	49.943	54.7373	52.3401	614.151	602.596	608.374	50.8224	48.9154	49.8689	11.6235	0.952785
AHI#1.34_936.4128n	408.122	545.131	476.626	5742.5	5321.51	5532	595.056	474.951	535.003	11.6066	1.12248
AHI#5.75_387.0759m/z	12.9684	9.07535	11.0219	143.007	112.831	127.919	34.1326	47.5223	40.8274	11.606	3.70422
AHI#2.03_250.0047m/z	30.9087	12.9769	21.9428	260.828	248.493	254.661	197.278	163.161	180.22	11.6057	8.21316
AHI#2.24_405.0019m/z	32.4973	29.8895	31.1934	348.7	365.613	357.157	19.4507	25.5585	22.5046	11.4498	0.721453
RPP#1.24_315.0515m/z	155.58	217.099	186.34	2005.91	2248.31	2127.11	224.341	215.35	219.846	11.4152	1.17981
ZHI#1.19_264.0304n	114.998	124.918	119.958	1307.59	1405.04	1356.31	154.792	122.951	138.871	11.3065	1.15767
AHI#2.00_430.0681m/z	55.2285	90.0809	72.6547	822.595	817.055	819.825	112.014	63.6783	87.8462	11.2839	1.20909
AHI#1.10_676.1836m/z	172.13	88.5456	130.338	1486.72	1453.11	1469.91	178.777	44.8533	111.815	11.2777	0.857889
AHI#3.07_369.0467m/z	22.9425	4.85814	13.9003	198.707	114.315	156.511	16.3466	8.19107	12.2688	11.2595	0.882629
ZHI#5.42_134.1630m/z	187.153	193.36	190.256	2026.74	2224.43	2125.58	5.42305	0	2.71153	11.1722	0.014252
RPP#1.26_510.0732n	128.011	139.382	133.696	1262.65	1702.04	1482.35	242.667	158.713	200.69	11.0874	1.50109
ZHI#5.65_367.9757n	17.5571	4.7636	11.1603	139.114	107.725	123.42	845.388	858.212	851.8	11.0588	76.3238
AHI#1.51_618.8014m/z	24.4186	18.0071	21.2129	253.492	207.611	230.552	24.3778	32.3574	28.3676	10.8685	1.33728
AHI#12.63_243.0262m/z	42.1764	41.109	41.6427	406.701	496.979	451.84	153.862	141.402	147.632	10.8504	3.5452
AHI#1.62_684.3396m/z	40.9372	41.1633	41.0502	476.653	411.763	444.208	29.5688	78.7218	54.1453	10.8211	1.319
AHI#1.22_806.1377m/z	14.3297	20.4087	17.3692	211.956	162.751	187.354	48.4808	38.944	43.7124	10.7865	2.51666
ZHI#6.66_482.1031m/z	106.051	74.0457	90.0482	975.598	960.552	968.075	111.067	105.984	108.526	10.7506	1.2052
AHI#1.20_486.0430m/z	23.5169	10.9632	17.24	154.298	213.108	183.703	8.02413	0	4.01206	10.6556	0.232718
ZHI#8.99_378.9810m/z	45.6806	48.2909	46.9857	453.199	547.999	500.599	183.653	210.505	197.079	10.6543	4.19445
ZHI#6.58_739.1335m/z	13.0954	11.2747	12.1851	124.485	134.397	129.441	23.1662	17.4422	20.3042	10.6229	1.66632
AHI#2.52_319.9443m/z	11.3324	12.9304	12.1314	117.154	140.033	128.593	31.1029	36.294	33.6985	10.6	2.77778
AHI#1.25_826.3613m/z	113.8	135.627	124.713	1382.98	1239.08	1311.03	79.3641	153.955	116.66	10.5123	0.935421
ZHI#11.53_265.0857m/z	0.419969	5.15735	2.78866	29.041	29.4136	29.2273	96.306	113.905	105.105	10.4808	37.6903
ZHI#6.66_466.1292m/z	190.373	259.358	224.865	2358.9	2327.53	2343.21	364.888	350.918	357.903	10.4205	1.59163
AHI#1.95_409.0095n	19.8866	39.5148	29.7007	312.883	300.564	306.723	109.036	104.303	106.67	10.3271	3.59149
ZHI#3.78_301.0313m/z	157.749	148.008	152.879	1559.64	1597.2	1578.42	315.829	423.152	369.491	10.3246	2.41689
ZHI#7.17_214.0330m/z	34.4969	44.9078	39.7024	396.22	416.462	406.341	605.312	591.099	598.206	10.2347	15.0673
ZHI#8.91_367.9789m/z	0.133285	0	0.0666424	1.35328	0	0.676642	283.458	201.259	242.358	10.1533	3636.69
ZHI#5.65_328.9867m/z	12.9712	39.4349	26.2031	281.287	249.533	265.41	1516.85	1370.33	1443.59	10.129	55.0924
AHI#1.95_381.0369m/z	106.554	152.826	129.69	1292.63	1333.62	1313.13	333.67	342.271	337.97	10.1251	2.60598
AHI#12.96_566.0536n	43.4566	23.6561	33.5563	381.59	295.037	338.314	51.4192	59.9846	55.7019	10.082	1.65995
AHI#1.34_945.3619n	52.4607	54.4146	53.4377	578.183	496.198	537.19	89.7815	72.4541	81.1178	10.0526	1.51799
RPP#5.58_195.5300m/z	0.75835	9.29899	5.02867	52.7116	48.1861	50.4488	3.76459	8.86195	6.31327	10.0322	1.25546
ZHI#5.68_344.9608m/z	26.8435	12.7918	19.8176	207.324	190.2	198.762	1020.17	1099.22	1059.7	10.0295	53.4723
AHI#1.12_488.0732n	440.702	852.835	646.768	6331.63	6600.21	6465.92	1057.6	1145.04	1101.32	9.99728	1.70281
AHI#3.21_192.0031m/z	6.88108	3.79579	5.33843	45.5016	60.7523	53.127	2.99331	3.52798	3.26065	9.95179	0.610787
ZHI#9.30_474.6835m/z	3.45147	0.313984	1.88273	17.4569	19.5027	18.4798	10.1173	12.8782	11.4978	9.81544	6.10697
AHI#3.45_539.0904m/z	30.2726	31.7865	31.0296	328.979	279.69	304.334	116.737	42.4319	79.5845	9.80789	2.5648
ZHI#5.65_580.9308m/z	2.21202	0.438002	1.32501	11.2305	14.6126	12.9215	240.461	244.241	242.351	9.752	182.905
AHI#1.62_345.9073m/z	3.6213	12.6727	8.14699	70.2089	87.0498	78.6293	31.2007	25.4903	28.3455	9.65133	3.47926
ZHI#6.68_635.1789m/z	48.6513	40.3846	44.518	364.978	493.763	429.371	16.297	49.4576	32.8773	9.64489	0.738519
ZHI#5.94_179.1188m/z	20.2247	18.2831	19.2539	206.592	162.27	184.431	17.3206	9.02848	13.1746	9.57889	0.684254
AHI#2.29_472.2494n	1546.38	2257.6	1901.99	17772.4	18630.2	18201.3	2941.09	2813.49	2877.29	9.56961	1.51278
AHI#3.55_656.6163m/z	1.9754	7.82102	4.89821	30.6039	63.0667	46.8353	43.9178	26.4456	35.1817	9.56172	7.18256
RPP#2.13_145.0828m/z	3.79871	2.80979	3.30425	28.2372	34.1644	31.2008	11.1203	19.325	15.2227	9.44262	4.60699
AHI#3.80_610.4328m/z	50.3921	0	25.196	193.848	280.816	237.332	65.7374	91.0689	78.4031	9.41942	3.11172
AHI#9.36_646.8457m/z	195.1	222.873	208.987	1931.35	1999.15	1965.25	224.72	156.601	190.66	9.40372	0.91231
ZHI#0.91_353.2693m/z	26.6291	10.5661	18.5976	177.993	171.599	174.796	43.9569	42.0321	42.9945	9.39887	2.31184
ZHI#6.81_449.0249m/z	12.0817	4.5933	8.33749	72.3497	83.3847	77.8672	25.5567	27.4601	26.5084	9.3394	3.17943
RPP#1.24_368.0680m/z	67.7336	57.3689	62.5513	589.429	576.165	582.797	14.547	70.4341	42.4905	9.31711	0.679291
ZHI#5.73_264.9935m/z	4.91011	4.4948	4.70245	43.0445	44.4807	43.7626	62.4131	55.9589	59.186	9.30634	12.5862
RPP#5.40_305.0261m/z	5.43114	5.72336	5.57725	49.4878	53.8535	51.6707	0	4.26404	2.13202	9.26454	0.382271
ZHI#5.65_636.9990m/z	1.91666	2.1155	2.01608	17.1646	20.1483	18.6564	522.416	449.516	485.966	9.25381	241.045
AHI#1.79_145.9661m/z	6.6894	7.71675	7.20307	61.8121	70.7009	66.2565	6.25886	4.85531	5.55709	9.19837	0.771488
AHI#1.74_382.0712n	197.057	371.444	284.251	2462.67	2757.71	2610.19	59.8732	180.356	120.115	9.1827	0.422566
AHI#3.03_374.0889m/z	76.8938	30.6684	53.7811	572.887	413.653	493.27	134.568	54.9767	94.7723	9.17182	1.76219
AHI#1.05_460.0519m/z	22.0685	10.1028	16.0856	120.056	174.982	147.519	40.9241	46.6096	43.7668	9.17084	2.72086
ZHI#6.58_553.0781n	94.8208	111.001	102.911	979.278	903.414	941.346	138.566	123.344	130.955	9.14718	1.27251
ZHI#5.71_193.1344m/z	41.551	43.3108	42.4309	399.789	369.016	384.402	22.2696	11.3325	16.801	9.05949	0.395962
AHI#1.29_783.2573m/z	52.5863	94.6209	73.6036	751.645	578.105	664.875	99.553	128.312	113.932	9.03319	1.54792
AHI#1.34_892.3486n	831.573	653.141	742.357	6822.65	6579.97	6701.31	891.791	775.411	833.601	9.02707	1.12291
ZHI#4.81_392.0402m/z	0.0213801	0	0.0106901	0	0.192462	0.0962308	1491.52	1311.82	1401.67	9.00188	131119
AHI#2.14_382.0446m/z	11.0078	35.039	23.0234	173.296	240.677	206.986	59.0608	88.6295	73.8451	8.99025	3.2074
AHI#12.58_283.0185m/z	38.0453	16.9668	27.5061	232.124	262.184	247.154	102.96	143.052	123.006	8.98542	4.47196
AHI#2.10_345.9074m/z	19.0916	11.4466	15.2691	128.971	143.895	136.433	25.7413	17.5436	21.6424	8.93524	1.4174
AHI#3.26_596.4212m/z	4.84938	24.4602	14.6548	189.752	71.8429	130.797	9.40352	25.3838	17.3936	8.92522	1.18689
AHI#1.81_417.0615m/z	101.279	82.2813	91.7802	793.658	839.586	816.622	153.12	165.744	159.432	8.89759	1.73711
ZHI#5.01_241.0124m/z	3.44304	11.5967	7.51985	54.2178	79.3534	66.7856	297.133	344.261	320.697	8.88125	42.6468
AHI#1.18_511.0972n	43.868	36.9746	40.4213	373.513	338.619	356.066	242.198	267.969	255.084	8.80888	6.31063
AHI#3.12_900.9978m/z	19.8008	30.4672	25.134	248.131	194.069	221.1	17.0316	31.2485	24.1401	8.79686	0.960456
AHI#3.10_136.2970m/z	252.542	374.338	313.44	2316.69	3188.62	2752.65	30.1163	29.3965	29.7564	8.78208	0.094935
RPP#1.24_136.0385n	1003.88	1170.18	1087.03	9196.61	9863.93	9530.27	2708.52	3166.67	2937.6	8.76726	2.70241
ZHI#5.65_527.0011m/z	3.37673	9.21953	6.29813	54.758	55.3075	55.0327	1077.16	1042.25	1059.7	8.73795	168.257
AHI#2.95_150.9767m/z	13.6125	12.9754	13.2939	115.115	117.046	116.08	12.6394	8.80664	10.723	8.73184	0.806609
AHI#4.97_302.8231m/z	5.81475	4.87964	5.3472	37.4709	55.5424	46.5067	13.8404	38.6368	26.2386	8.69739	4.90698
AHI#1.67_353.0438n	270.862	209.69	240.276	2015.25	2160.73	2087.99	446.786	500.914	473.85	8.68995	1.9721
ZHI#4.91_598.0966m/z	0	0.101464	0.0507322	0.87908	0	0.43954	625.702	569.757	597.73	8.66392	11782.1
AHI#2.90_626.6599m/z	27.694	23.2174	25.4557	216.263	219.482	217.873	29.8864	14.2492	22.0678	8.5589	0.866909
ZHI#6.78_361.0754m/z	28.8285	12.8109	20.8197	171.982	183.501	177.741	10.9459	8.57409	9.76	8.53717	0.468787
ZHI#5.65_432.9771m/z	18.5999	3.25354	10.9267	99.8181	83.7658	91.7919	1122.22	1130.99	1126.6	8.40068	103.105
ZHI#4.12_415.0589m/z	102.086	64.5766	83.3314	724.559	652.087	688.323	155.973	125.178	140.575	8.26007	1.68694
RPP#1.52_322.0447m/z	47.2665	35.2589	41.2627	292.63	387.275	339.952	72.7895	71.6408	72.2152	8.23873	1.75013
AHI#3.38_200.0040m/z	5.33597	7.53133	6.43365	44.3417	61.0214	52.6816	6.57735	2.57467	4.57601	8.18844	0.711262
AHI#1.79_368.3161m/z	8.31991	0	4.15996	53.0741	14.6241	33.8491	31.9462	44.6756	38.3109	8.13689	9.20944
AHI#1.84_430.0673m/z	95.4722	94.8586	95.1654	789.213	758.092	773.653	74.0636	79.1409	76.6022	8.12956	0.804938
AHI#10.04_940.0438m/z	13.4881	29.2462	21.3671	161.443	184.884	173.164	21.1023	5.63856	13.3704	8.10421	0.625747
AHI#1.31_444.0832m/z	100.919	43.5615	72.2401	511.323	659.254	585.288	149.817	89.814	119.816	8.10199	1.65857
ZHI#3.83_250.0335m/z	472.077	433.303	452.69	3861.72	3448.98	3655.35	906.109	1058.39	982.25	8.07474	2.16981
AHI#1.51_618.2993m/z	73.481	65.6049	69.543	544.021	568.143	556.082	91.1892	73.0932	82.1412	7.99624	1.18116
RPP#1.26_513.0708m/z	193.743	170.579	182.161	1432.39	1478.76	1455.58	211.192	184.389	197.79	7.9906	1.0858
RPP#1.02_188.1754m/z	11.1546	5.05802	8.10629	52.1418	77.1881	64.6649	4.72471	4.42126	4.57298	7.97713	0.564128
ZHI#6.58_612.1267m/z	15.9227	39.1872	27.555	221.785	216.918	219.351	19.8534	18.3771	19.1152	7.9605	0.693712
RPP#5.58_147.5360m/z	5.196	9.34178	7.26889	57.5359	57.4469	57.4914	11.3745	11.0421	11.2083	7.90924	1.54195
ZHI#6.68_269.0255m/z	40.7716	38.7501	39.7609	312.268	313.696	312.982	20.6938	5.35734	13.0256	7.87161	0.327598
AHI#4.21_150.9766m/z	7.35436	7.83599	7.59517	48.3898	70.9868	59.6883	11.5975	6.91182	9.25464	7.85871	1.21849
ZHI#6.07_294.0557m/z	57.404	88.8584	73.1312	542.993	600.548	571.77	222.16	201.013	211.586	7.81841	2.89324
AHI#2.19_312.9601m/z	19.41	2.66581	11.0379	84.9916	85.7683	85.38	14.3379	3.00189	8.6699	7.73516	0.785466
AHI#3.21_318.0641m/z	175.046	161.73	168.388	1234.97	1357.09	1296.03	219.067	247.482	233.275	7.69668	1.38534
AHI#5.35_226.9514m/z	6.71855	4.97631	5.84743	45.5599	43.9787	44.7693	28.7129	18.311	23.512	7.65623	4.0209
ZHI#5.65_503.9714n	6.76546	6.93403	6.84974	53.6641	50.9168	52.2905	600.133	566.229	583.181	7.63393	85.1391
ZHI#8.99_327.0095m/z	42.081	76.4686	59.2748	422.566	480.76	451.663	212.095	242.479	227.287	7.61982	3.83446
AHI#3.36_234.0615m/z	9.7971	9.55853	9.67782	85.7964	61.4436	73.62	189.374	146.502	167.938	7.60709	17.3529
ZHI#3.73_420.2249m/z	91.6556	120.499	106.077	939.232	659.955	799.594	904.343	880.922	892.633	7.53784	8.41493
ZHI#1.24_264.9782m/z	46.0838	44.2812	45.1825	338.052	340.453	339.252	9.413	5.42121	7.41711	7.50849	0.164159
AHI#1.29_901.3332n	93.0558	74.4547	83.7552	725.34	531.522	628.431	84.2904	88.7517	86.521	7.50319	1.03302
RPP#6.40_199.0809m/z	1.71372	1.65885	1.68628	19.3395	5.91743	12.6285	10.1649	14.8496	12.5073	7.48894	7.41707
AHI#1.22_403.0590n	56.1832	91.3915	73.7873	516.785	580.634	548.709	80.1316	29.0168	54.5742	7.43636	0.739615
RPP#5.42_129.0207n	5.40349	9.89504	7.64926	61.4686	51.918	56.6933	10.7228	14.9014	12.8121	7.41161	1.67495
RPP#5.58_186.5245m/z	9.16222	7.69458	8.4284	69.8872	54.7924	62.3398	10.1091	5.18899	7.64903	7.39639	0.90753
AHI#2.34_476.0587m/z	17.4136	39.0756	28.2446	170.667	244.083	207.375	36.3556	23.243	29.7993	7.34211	1.05504
ZHI#6.78_224.9989m/z	21.1345	41.967	31.5507	232.7	224.828	228.764	47.0341	52.8103	49.9222	7.25069	1.58228
RPP#2.74_156.1382m/z	9.583	7.53404	8.55852	66.4397	56.9656	61.7026	26.5748	19.4271	23.0009	7.2095	2.68749
AHI#3.10_262.0198m/z	97.6132	100.573	99.0933	667.508	748.179	707.843	103.398	110.545	106.972	7.1432	1.0795
AHI#7.32_162.0579m/z	22.2909	28.9665	25.6287	188.788	176.694	182.741	654.285	730.448	692.366	7.13033	27.0153
AHI#2.93_224.0278n	19.9843	22.4572	21.2207	161.719	140.311	151.015	42.76	17.3554	30.0577	7.11638	1.41643
AHI#3.07_659.1841m/z	597.08	894.918	745.999	4954.74	5638.52	5296.63	495.359	551.731	523.545	7.10005	0.701804
AHI#2.33_534.3109m/z	1945.78	2670.89	2308.34	15844.2	16887.8	16366	3319.49	3524.5	3421.99	7.08996	1.48245
ZHI#10.04_424.9258m/z	6.07466	14.033	10.0538	65.9214	76.2968	71.1091	80.2976	92.3683	86.333	7.07282	8.58706
AHI#1.95_376.0306m/z	376.422	248.802	312.612	2226.9	2194.29	2210.59	203.953	224.879	214.416	7.07136	0.685884
AHI#3.07_174.0176m/z	49.1146	69.3755	59.245	437.527	400.26	418.893	39.7146	42.7943	41.2544	7.07052	0.696336
AHI#1.86_372.9851n	45.992	52.4251	49.2086	391.783	300.388	346.086	119.273	107.097	113.185	7.03304	2.30011
ZHI#6.30_195.0508m/z	558.727	635.188	596.957	4263.51	4115.23	4189.37	355.719	475.847	415.783	7.01787	0.696504
AHI#1.81_493.0600n	35.1947	106.188	70.6911	424.583	567.393	495.988	309.421	375.159	342.29	7.01627	4.84205
AHI#1.18_507.9866m/z	43.9626	29.4065	36.6846	288.641	225.312	256.976	70.7702	48.2634	59.5168	7.00503	1.62239
ZHI#5.71_339.0620m/z	9.4403	27.5523	18.4963	143.24	115.551	129.396	268.903	218.921	243.912	6.99576	13.1871
ZHI#3.81_469.2926m/z	63.3087	52.5514	57.93	393.947	415.008	404.478	33.6428	35.199	34.4209	6.98218	0.594181
AHI#3.09_136.3360m/z	998.049	1142.57	1070.31	7360.32	7552.84	7456.58	17281.2	18534.2	17907.7	6.96674	16.7313
AHI#1.93_412.0063m/z	15.1184	13.665	14.3917	94.1479	105.807	99.9774	0	15.7445	7.87223	6.94687	0.546997
AHI#9.05_362.7254m/z	2.46425	6.37527	4.41976	28.1694	32.9059	30.5377	14.2371	12.6796	13.4583	6.90935	3.04503
AHI#1.08_204.1238m/z	374.254	394.511	384.382	2642.24	2646.25	2644.25	2251.29	2285.14	2268.22	6.87921	5.90094
ZHI#6.14_185.0218m/z	62.8871	54.2911	58.5891	407.854	395.345	401.6	54.5202	27.3996	40.9599	6.85451	0.699105
ZHI#6.63_329.0260m/z	158.115	169.549	163.832	1044.11	1195.18	1119.64	102.739	96.189	99.4642	6.83411	0.607112
AHI#1.01_680.4054m/z	15.4901	103.145	59.3173	425.724	384.824	405.274	176.9	190.331	183.616	6.8323	3.09548
AHI#1.77_199.9767m/z	32.4851	24.3503	28.4177	230.404	155.813	193.109	4.55105	10.4695	7.51029	6.79538	0.264282
ZHI#3.58_315.0093m/z	15.1979	24.1028	19.6504	210.32	56.1123	133.216	1631.41	1554.81	1593.11	6.77933	81.073
AHI#1.96_308.9584m/z	9.22472	4.35543	6.79007	46.045	45.4331	45.7391	13.6341	19.3874	16.5107	6.73617	2.4316
AHI#1.20_413.0651n	410.675	374.025	392.35	2561.89	2711.46	2636.67	877.222	751.548	814.385	6.72021	2.07566
AHI#3.07_364.0954m/z	1090.86	1166.49	1128.68	7248.24	7919.66	7583.95	1085.17	1345.28	1215.23	6.71931	1.07668
AHI#2.26_416.0515m/z	90.7273	98.5507	94.639	533.872	735.228	634.55	184.373	236.645	210.509	6.70495	2.22434
AHI#3.26_305.0236m/z	2.41491	6.00199	4.20845	22.8613	33.4896	28.1754	3.41862	5.83172	4.62517	6.69496	1.09902
ZHI#3.91_119.0498m/z	1733.44	1768.01	1750.73	11383.6	11795.2	11589.4	2009.85	2015.34	2012.6	6.61976	1.14958
RPP#5.40_268.0257n	57.1068	55.8861	56.4964	380.809	366.155	373.482	62.0188	62.5464	62.2826	6.61072	1.10242
AHI#11.82_158.1364m/z	0	1.03231	0.516154	0	6.8009	3.40045	3.11471	1.29891	2.20681	6.58806	4.27548
AHI#7.18_784.4440m/z	19.1122	61.3499	40.231	273.466	255.782	264.624	61.6895	70.2846	65.9871	6.57761	1.6402
AHI#3.07_524.1310m/z	458.799	426.316	442.558	2822.29	2995.53	2908.91	363.206	507.202	435.204	6.57295	0.983384
RPP#5.42_160.5121m/z	7.88952	4.98607	6.43779	41.1983	43.3575	42.2779	16.0459	12.762	14.4039	6.56714	2.2374
AHI#1.98_462.0320m/z	18.3402	24.9111	21.6257	147.983	134.533	141.258	68.6973	53.1959	60.9466	6.53196	2.81825
ZHI#6.68_534.1166m/z	45.3619	42.0095	43.6857	241.394	327.646	284.52	35.5169	45.1867	40.3518	6.5129	0.923685
ZHI#6.53_149.9980n	189.863	177.231	183.547	1229.31	1144.2	1186.76	275.881	254.028	264.954	6.46571	1.44353
ZHI#0.98_295.2643m/z	157.113	129.871	143.492	967.722	886.869	927.296	14105.1	13368.6	13736.9	6.46235	95.7326
ZHI#6.45_188.0925m/z	1636.2	1560.04	1598.12	10441.5	10111.7	10276.6	1759.46	1700.47	1729.97	6.43041	1.0825
ZHI#5.65_652.9731m/z	0.00225239	2.55873	1.28049	9.65005	6.66482	8.15744	555.918	550.474	553.196	6.37056	432.019
RPP#1.23_164.9962m/z	1.96992	1.2401	1.60501	17.5104	2.88289	10.1966	345.927	334.284	340.106	6.353	211.902
RPP#2.71_180.0414m/z	4.34729	1.31e-05	2.17365	4.05321	23.5531	13.8032	6.22075	11.0828	8.65175	6.35021	3.98028
AHI#12.94_576.3494m/z	9.42358	15.6087	12.5161	100.813	58.0308	79.422	55.6348	69.2431	62.439	6.34558	4.98868
RPP#5.58_156.5411m/z	34.1708	42.5561	38.3634	258.99	224.271	241.63	45.0889	32.6903	38.8896	6.29845	1.01372
AHI#8.27_391.8945m/z	6.50947	12.1705	9.33997	40.9558	76.2771	58.6164	53.942	111.389	82.6656	6.27587	8.85073
ZHI#6.40_154.9958m/z	0.241662	0.112059	0.17686	2.13518	0.0830548	1.10912	229.16	195.636	212.398	6.27116	1200.94
ZHI#9.02_168.9900m/z	25.266	37.395	31.3305	183.754	207.854	195.804	72.5135	82.7641	77.6388	6.24964	2.47806
RPP#13.32_403.7529m/z	34.8162	16.9829	25.8996	182.796	139.05	160.923	62.3187	28.9933	45.656	6.21336	1.76281
AHI#1.25_743.1612m/z	34.4896	92.7394	63.6145	438.727	351.597	395.162	91.3615	90.1513	90.7564	6.21182	1.42666
ZHI#5.65_446.0678m/z	12.1561	0	6.07804	41.0033	34.38	37.6917	0	0	0	6.20129	0
ZHI#6.55_382.0839m/z	115.36	139.237	127.298	817.243	758.189	787.716	125.02	119.7	122.36	6.18794	0.961207
ZHI#6.58_500.1132m/z	135.533	146.526	141.029	894.899	835.495	865.197	155.322	194.686	175.004	6.13488	1.24091
AHI#2.10_511.9328n	224.283	176.133	200.208	1211.04	1236.39	1223.71	266.785	253.156	259.971	6.1122	1.2985
ZHI#4.09_230.9461m/z	51.5262	59.7631	55.6447	349.573	330.016	339.794	47.6138	20.5272	34.0705	6.10651	0.612287
RPP#3.00_156.1381m/z	8.63631	21.3069	14.9716	81.2866	100.368	90.8274	66.2402	53.4802	59.8602	6.06665	3.99825
ZHI#6.81_292.9864m/z	35.2934	53.0436	44.1685	275.365	258.053	266.709	44.0071	81.2778	62.6425	6.03845	1.41826
ZHI#6.66_460.1121m/z	160.541	185.87	173.205	1021.98	1068.55	1045.26	60.6459	88.06	74.353	6.03482	0.429277
AHI#1.95_531.0871m/z	126.789	32.4472	79.6179	518.437	436.714	477.575	150.983	133.911	142.447	5.99834	1.78913
AHI#2.91_477.2295m/z	37.6586	18.9603	28.3095	216.075	123.461	169.768	29.2205	32.1822	30.7013	5.99687	1.08449
ZHI#6.66_665.2456m/z	94.5364	115.02	104.778	629.459	619.939	624.699	152.775	137.113	144.944	5.9621	1.38334
AHI#2.27_438.0356m/z	49.5743	89.3295	69.4519	388.578	432.772	410.675	99.9167	87.1642	93.5404	5.91309	1.34684
AHI#1.24_764.3016n	185.388	182.057	183.722	902.37	1242.78	1072.58	110.664	187.076	148.87	5.83803	0.810299
ZHI#8.32_168.9908m/z	21.8818	51.6778	36.7798	231.308	197.648	214.478	53.5771	79.5136	66.5454	5.83141	1.80929
AHI#1.98_451.0468n	300.244	183.125	241.685	1441.65	1376.26	1408.96	698.304	624.716	661.51	5.82973	2.73708
RPP#1.37_170.0147m/z	4231.36	4168.4	4199.88	23103.6	25589	24346.3	4945.03	5346.97	5146	5.7969	1.22527
AHI#5.11_359.0314m/z	32.7088	25.2343	28.9715	175.882	159.983	167.933	29.666	37.9193	33.7926	5.79647	1.16641
AHI#5.11_262.9900m/z	9.66865	14.7762	12.2224	67.5174	73.2089	70.3632	6.15851	14.0712	10.1149	5.7569	0.827568
AHI#2.01_318.0091m/z	14.4752	15.7974	15.1363	105.085	68.8263	86.9555	81.2841	61.6517	71.4679	5.74484	4.72163
AHI#3.02_124.2060m/z	86.5569	76.4614	81.5092	495.06	440.443	467.751	85.2739	91.6695	88.4717	5.73864	1.08542
AHI#3.45_237.0295m/z	32.1421	43.5938	37.8679	225.14	207.308	216.224	278.712	184.094	231.403	5.70994	6.1108
RPP#14.30_677.3501m/z	3.32889	6.2863	4.8076	21.3191	33.243	27.281	35.9807	20.0319	28.0063	5.67457	5.82543
ZHI#3.17_285.1322m/z	5597.04	5480.08	5538.56	30567.3	32269.3	31418.3	2934.77	3245.19	3089.98	5.67265	0.557903
ZHI#7.07_227.0780m/z	400.734	475.254	437.994	2415.01	2551.64	2483.33	661.156	754.772	707.964	5.66977	1.61638
AHI#7.72_162.0571m/z	2.64162	6.56002	4.60082	33.1899	18.5534	25.8716	75.4639	66.3668	70.9154	5.62327	15.4136
AHI#1.77_503.0828n	474.511	534.832	504.671	2722.31	2952.34	2837.33	727.524	605.171	666.348	5.62213	1.32036
AHI#1.05_471.1102n	134.961	104.204	119.583	658.859	684.236	671.547	129.378	84.9413	107.16	5.61576	0.896115
AHI#2.24_478.0534n	415.296	574.768	495.032	2594.96	2955.93	2775.44	558.538	577.886	568.212	5.6066	1.14783
AHI#3.09_459.0711m/z	43.2932	81.2308	62.262	322.454	374.797	348.625	68.4306	116.742	92.5862	5.59933	1.48704
AHI#3.43_213.0506m/z	31.3147	50.0757	40.6952	240.163	215.351	227.757	133.724	88.8726	111.299	5.59665	2.73493
ZHI#8.99_356.9990m/z	260.376	330.657	295.517	1500.6	1806.72	1653.66	754.471	820.225	787.348	5.59583	2.66431
AHI#1.36_470.6841n	217.222	181.566	199.394	1054.56	1165.7	1110.13	275.673	203.532	239.602	5.56753	1.20165
ZHI#9.91_342.0225m/z	0	2.00377	1.00188	5.01202	6.1349	5.57346	222.231	214.248	218.239	5.56299	217.829
AHI#13.63_188.1754m/z	2349.65	2474.01	2411.83	13305.3	13206.6	13256	1971.08	1963.96	1967.52	5.49623	0.815779
AHI#3.31_741.3542m/z	223.591	295.407	259.499	1454.24	1394.33	1424.28	325.578	426	375.789	5.4886	1.44814
RPP#14.43_206.9547m/z	0.275223	2.93769	1.60646	9.96417	7.6681	8.81614	9.67199	9.14011	9.40605	5.48794	5.85516
AHI#3.00_306.0648m/z	38.44	64.4894	51.4647	308.513	255.508	282.01	165.759	199.125	182.442	5.47969	3.545
AHI#1.63_374.0323m/z	25.3754	28.9408	27.1581	136.769	158.026	147.398	40.0267	45.0594	42.543	5.42739	1.5665
AHI#1.06_559.8183m/z	13.7291	21.7225	17.7258	99.5147	91.9911	95.7529	42.3347	38.5698	40.4523	5.40188	2.28211
ZHI#3.19_327.0180m/z	108.358	34.3187	71.3384	321.364	446.113	383.739	162.993	115.463	139.228	5.37914	1.95165
AHI#10.23_191.0399m/z	25.5959	29.7959	27.6959	154.49	142.05	148.27	20.2925	20.4149	20.3537	5.35351	0.734901
ZHI#5.65_197.0065m/z	501.496	580.854	541.175	2937.74	2776.26	2857	18745.2	17638	18191.6	5.27925	33.615
AHI#2.12_370.0482m/z	35.2454	35.0549	35.1502	180.13	190.991	185.561	25.3653	25.543	25.4542	5.27908	0.724155
AHI#3.21_214.0700m/z	383.645	306.495	345.07	1861.59	1751.48	1806.53	333.967	353.055	343.511	5.23526	0.995481
AHI#2.10_417.0382m/z	50.7221	11.826	31.274	177.181	147.958	162.569	289.464	181.785	235.624	5.19822	7.53419
RPP#1.26_319.5495m/z	49.0482	42.889	45.9686	190.49	287.255	238.872	23.4943	39.7357	31.615	5.19643	0.687753
AHI#1.55_622.2784n	126.665	160.103	143.384	742.53	745.92	744.225	149.636	159.694	154.665	5.19042	1.07867
AHI#2.14_463.0155n	218.435	126.98	172.708	990.561	796.089	893.325	312.503	262.191	287.347	5.17247	1.66378
AHI#2.98_122.0248m/z	15.6611	23.7089	19.685	105.919	97.6948	101.807	20.8403	27.3682	24.1043	5.1718	1.2245
RPP#7.40_195.0172m/z	0	3.08932	1.54466	9.33379	6.64338	7.98858	14.3635	6.20843	10.286	5.17175	6.65905
ZHI#10.15_245.1251m/z	42.0372	25.3222	33.6797	192.508	155.742	174.125	47.904	40.2157	44.0599	5.17004	1.3082
AHI#2.08_353.9882m/z	6.90332	12.5171	9.7102	58.7699	41.1321	49.951	73.1549	59.0093	66.0821	5.14418	6.80543
AHI#1.41_356.0703m/z	140.092	151.384	145.738	773.943	725.135	749.539	328.514	243.11	285.812	5.14306	1.96114
ZHI#7.71_403.5558m/z	12.0598	18.0625	15.0611	87.4577	67.0243	77.241	1033.04	1125.57	1079.31	5.12849	71.6616
AHI#2.10_484.9968n	120.993	87.4343	104.214	529.789	539.121	534.455	113.167	68.5775	90.8725	5.12845	0.871982
ZHI#6.55_395.0820n	1340.67	1471.42	1406.05	7306.79	7108.97	7207.88	1679.45	1462.28	1570.87	5.12635	1.11722
ZHI#7.12_201.0385m/z	174.887	171.436	173.161	879.765	893.369	886.567	190.659	162.498	176.578	5.11989	1.01973
AHI#3.80_633.4476m/z	29.5734	12.5806	21.077	99.0806	116.209	107.645	58.3909	70.9417	64.6663	5.10721	3.06809
ZHI#6.55_456.0331m/z	315.13	288.447	301.789	1517.67	1561.05	1539.36	349.495	344.718	347.107	5.10078	1.15016
AHI#3.10_597.1343m/z	366.407	309.647	338.027	2096.92	1337.93	1717.42	1232.36	1349.88	1291.12	5.08073	3.81957
ZHI#3.60_186.1133m/z	4931.41	5163.71	5047.56	25598.6	25665.5	25632.1	19500.3	19357.2	19428.8	5.07811	3.84914
RPP#1.37_338.0158n	3021.29	2870.68	2945.99	14403.6	15427.2	14915.4	3296.28	3609.39	3452.84	5.06296	1.17205
AHI#3.74_421.0116m/z	0	17.3932	8.69658	33.7523	53.9042	43.8282	29.2052	6.40354	17.8044	5.03971	2.04728
ZHI#5.45_218.9500m/z	11.3153	17.5499	14.4326	92.507	52.8622	72.6846	128.437	93.8697	111.153	5.03613	7.70153
AHI#3.10_118.0277n	392177	393245	392711	1.96142e+06	1.98503e+06	1.97323e+06	151730	153442	152586	5.02463	0.388545
AHI#2.98_452.0374m/z	71.329	60.6394	65.9842	302.637	359.081	330.859	28.932	73.1752	51.0536	5.01422	0.773725
AHI#2.34_467.9613n	39.0016	49.3004	44.151	174.538	267.5	221.019	168.426	183.487	175.956	5.00598	3.98533
AHI#5.30_294.9485m/z	10.2395	14.5732	12.4064	69.1892	54.7035	61.9464	30.7303	29.2566	29.9935	4.99311	2.41759
ZHI#8.99_259.0220m/z	2380.12	2910.9	2645.51	12692.7	13702.7	13197.7	7410.96	6949.45	7180.2	4.98872	2.71411
AHI#3.07_549.0910m/z	56.7368	78.2819	67.5093	423.185	249.164	336.175	129.167	173.258	151.212	4.97968	2.23987
AHI#3.02_230.0479m/z	1014.05	869.169	941.61	4555.51	4787.48	4671.49	867.064	885.599	876.332	4.96118	0.930674
AHI#3.00_227.0485m/z	405.428	329.839	367.634	1811.79	1833.93	1822.86	316.233	377.295	346.764	4.95836	0.943233
AHI#2.10_196.0579n	271.185	208.08	239.632	1213.82	1147.48	1180.65	329.264	308.579	318.921	4.92692	1.33088
ZHI#5.65_542.9752m/z	11.816	4.70469	8.26033	48.0048	33.3847	40.6947	956.137	912.023	934.08	4.92653	113.08
ZHI#5.50_239.9943m/z	22.4734	23.3788	22.9261	117.512	108.098	112.805	102.349	98.9138	100.631	4.9204	4.38939
AHI#1.84_451.0424n	236.105	116.026	176.065	852.994	879.233	866.113	282.596	338.975	310.786	4.91927	1.76517
AHI#2.36_180.0029n	56.7987	67.3017	62.0502	288.548	320.95	304.749	134.153	117.221	125.687	4.91133	2.02557
AHI#1.55_316.9948n	187.1	146.051	166.575	762.979	871.779	817.379	288.528	282.606	285.567	4.90696	1.71434
ZHI#6.58_606.1100m/z	57.1887	30.3711	43.7799	171.383	256.861	214.122	85.4673	36.3131	60.8902	4.89088	1.39083
RPP#1.49_294.5076m/z	6.88071	19.0611	12.9709	61.2185	65.4466	63.3325	45.1212	22.4591	33.7901	4.88266	2.60507
ZHI#5.14_131.0710m/z	23.2951	26.0278	24.6614	114.239	126.566	120.403	16.5216	24.5251	20.5233	4.88223	0.832205
AHI#1.39_459.0238n	171.17	177.928	174.549	908.299	794.757	851.528	219.098	167.899	193.499	4.87845	1.10856
AHI#7.88_173.1388m/z	77.3412	60.6967	69.0189	358.206	315.203	336.705	147.69	156.195	151.943	4.87844	2.20147
AHI#2.34_445.0723m/z	23.8851	10.5585	17.2218	85.9564	81.738	83.8472	98.8962	115.81	107.353	4.86866	6.23356
AHI#2.24_611.0159n	133.768	183.216	158.492	730.325	808.38	769.353	223.254	123.813	173.534	4.8542	1.0949
AHI#3.07_704.1642m/z	122.075	208.747	165.411	832.433	772.477	802.455	72.4717	216.539	144.505	4.85127	0.873613
AHI#2.26_150.9765m/z	114.723	101.859	108.291	534.277	513.804	524.041	147.977	123.367	135.672	4.8392	1.25285
ZHI#6.86_248.1135m/z	518.443	520.941	519.692	2464.63	2564.16	2514.4	362.75	371.248	366.999	4.83825	0.706187
RPP#4.83_204.1238m/z	72.2247	63.719	67.9719	338.39	316.583	327.486	259.807	237.087	248.447	4.81797	3.65515
AHI#1.58_662.3260m/z	176.98	139.45	158.215	701.768	822.455	762.111	223.651	121.604	172.627	4.81694	1.09109
AHI#3.07_158.0439m/z	1564.28	1410.79	1487.54	7318.1	6942.52	7130.31	1288.82	1290.1	1289.46	4.79336	0.866841
ZHI#5.71_286.9763m/z	0	35.2949	17.6475	83.0551	85.8147	84.4349	86.7825	99.3984	93.0904	4.78454	5.27501
AHI#1.86_406.0431n	20.3135	41.7518	31.0327	158.665	137.685	148.175	107.394	116.383	111.889	4.77481	3.60551
AHI#2.27_428.2197n	4179.8	5414.38	4797.09	22031.3	23567.4	22799.3	5250.57	5295.2	5272.89	4.75274	1.09918
AHI#5.04_304.9727m/z	6.61826	10.8472	8.73273	33.6061	49.2386	41.4223	5.39028	3.85563	4.62295	4.74334	0.529382
ZHI#5.65_564.9569m/z	6.29243	9.41631	7.85437	36.8153	37.4676	37.1415	503.708	470.718	487.213	4.72876	62.0308
ZHI#6.78_360.9749m/z	0	7.73377	3.86689	23.7803	12.6411	18.2107	9.26649	19.8213	14.5439	4.70939	3.76114
ZHI#6.53_644.0646n	131.236	107.054	119.145	533.046	586.582	559.814	155.269	144.023	149.646	4.6986	1.256
AHI#2.08_406.0179n	81.071	51.2622	66.1666	316.569	304.659	310.614	157.412	155.358	156.385	4.69442	2.36351
ZHI#3.86_369.0785m/z	1288.8	1097.77	1193.28	5411.25	5751.56	5581.41	2943.55	3139.51	3041.53	4.67735	2.54887
AHI#6.08_398.0398m/z	12.4273	11.912	12.1696	55.6667	57.7452	56.706	27.7792	25.1504	26.4648	4.65963	2.17466
RPP#11.98_155.4692m/z	0.986539	1.04363	1.01508	3.07636	6.37739	4.72687	5.2879	9.16463	7.22627	4.65663	7.11888
AHI#3.73_241.0257m/z	12.2168	18.269	15.2429	59.7665	82.0777	70.9221	22.9599	15.443	19.2014	4.6528	1.2597
AHI#12.92_405.0117m/z	20.0554	8.65491	14.3552	65.9582	67.5397	66.749	14.6832	14.9694	14.8263	4.64983	1.03282
AHI#1.22_388.0093m/z	6.32705	10.7153	8.52117	60.4024	18.708	39.5552	18.8722	2.48184	10.677	4.64199	1.253
AHI#1.69_430.0670m/z	201.96	235.166	218.563	1038.27	985.53	1011.9	469.586	439.637	454.611	4.62979	2.08
AHI#2.00_490.9610m/z	399.097	343.947	371.522	1656.86	1780.66	1718.76	477.248	572.299	524.774	4.62628	1.4125
ZHI#9.02_426.0218m/z	219.108	244.406	231.757	1069.02	1073.66	1071.34	385.375	329.61	357.493	4.62269	1.54253
ZHI#5.42_107.0358m/z	269.338	272.154	270.746	1243.44	1257.88	1250.66	69.5524	73.6728	71.6126	4.6193	0.264501
RPP#9.95_208.4412m/z	2.27146	0.484039	1.37775	8.93165	3.72072	6.32619	9.76023	8.39656	9.07839	4.59168	6.58929
RPP#1.26_173.0118m/z	1496.91	1386.2	1441.56	6518.84	6647.25	6583.05	1701.71	1814.7	1758.2	4.56662	1.21965
AHI#2.78_375.0617m/z	51.6954	76.6136	64.1545	229.926	352.891	291.409	48.463	145.514	96.9887	4.5423	1.5118
AHI#3.52_410.1045m/z	60.8357	100.211	80.5232	356.117	372.991	364.554	246.866	95.7756	171.321	4.52732	2.12759
RPP#1.24_209.5369n	782.411	972.029	877.22	3122.71	4806.36	3964.54	638.792	599.735	619.263	4.51943	0.705939
AHI#2.95_644.9809m/z	51.6952	11.5713	31.6332	171.015	113.923	142.469	143.621	117.071	130.346	4.50378	4.12053
RPP#8.31_420.7634m/z	4.90922	2.90454	3.90688	17.7265	17.4102	17.5683	15.4022	10.2615	12.8318	4.49677	3.28442
AHI#1.20_776.4518m/z	84.0022	148.591	116.297	506.401	538.087	522.244	165.381	218.606	191.994	4.49062	1.6509
RPP#4.90_152.0241m/z	30.8441	23.2677	27.0559	108.345	132.574	120.459	38.4165	32.28	35.3482	4.45223	1.30649
AHI#2.64_579.0144m/z	5.20545	7.75713	6.48129	23.9444	33.7421	28.8433	25.4062	25.5628	25.4845	4.45024	3.93201
AHI#7.53_415.3556m/z	12.1581	3.52113	7.83959	33.9798	35.6673	34.8236	15.2	19.4942	17.3471	4.44201	2.21275
AHI#1.34_902.2961n	283.016	313.674	298.345	1223.27	1426.64	1324.95	455.879	357.221	406.55	4.44101	1.36268
AHI#3.21_132.0653m/z	545.727	554.366	550.047	2396.12	2480.49	2438.31	677.761	601.218	639.49	4.43291	1.16261
AHI#2.93_461.9037n	35.0579	33.355	34.2065	149.72	153.482	151.601	106.114	77.5642	91.8392	4.43194	2.68485
ZHI#5.63_448.9511m/z	0	3.0474	1.5237	3.12832	10.3399	6.7341	206.628	190.883	198.755	4.41957	130.442
AHI#3.10_547.1116m/z	91.9692	76.8215	84.3953	272.481	473.319	372.9	69.889	244.462	157.176	4.41849	1.86237
AHI#1.62_483.8602m/z	24.1933	42.1378	33.1655	116.644	176.166	146.405	35.2789	61.8505	48.5647	4.41437	1.46431
ZHI#6.60_158.0149m/z	60.0508	71.6512	65.851	283.093	297.45	290.272	115.015	105.803	110.409	4.408	1.67665
ZHI#3.96_204.0874m/z	3743.05	3679.45	3711.25	16138.8	16552.2	16345.5	3340.17	3322.89	3331.53	4.40431	0.897683
ZHI#10.04_211.9603m/z	374.003	418.234	396.118	1711.03	1766.31	1738.67	2410.04	2131.49	2270.77	4.38927	5.73255
AHI#2.93_362.9863m/z	206.603	151.065	178.834	878.842	688.242	783.542	462.844	355.859	409.352	4.38138	2.289
AHI#1.22_516.0820m/z	36.0227	172.093	104.058	371.85	537.676	454.763	98.4497	66.9565	82.7031	4.37029	0.794781
AHI#5.32_390.9971m/z	16.5453	11.0915	13.8184	59.0398	61.2041	60.122	30.9685	26.4699	28.7192	4.35087	2.07833
AHI#2.90_261.9385m/z	13.8722	29.9399	21.9061	91.6385	98.1598	94.8991	42.0621	34.16	38.111	4.33209	1.73975
AHI#3.21_552.3924m/z	54.5282	12.8626	33.6954	142.748	149.09	145.919	22.3184	15.1293	18.7239	4.33054	0.55568
AHI#1.57_503.0619n	45.6989	43.6959	44.6974	179.388	207.411	193.399	28.4055	41.6099	35.0077	4.32686	0.783215
AHI#1.65_465.0562n	189.664	275.574	232.619	872.609	1139.82	1006.22	234.74	271.978	253.359	4.3256	1.08916
ZHI#8.68_342.9833m/z	35.4503	34.1146	34.7825	142.514	155.795	149.154	81.246	101.455	91.3506	4.28821	2.62634
AHI#1.63_480.0796m/z	46.7799	53.6688	50.2244	234.134	196.237	215.185	49.832	76.1239	62.978	4.28448	1.25393
ZHI#6.60_278.0823n	2321.79	2394.35	2358.07	9866.28	10335.4	10100.8	2324.54	2308.06	2316.3	4.28351	0.982286
RPP#1.26_141.5323m/z	453.835	441.635	447.735	1830.86	2000.48	1915.67	511.984	479.757	495.871	4.27858	1.10751
AHI#5.02_525.5051m/z	19.5421	6.21673	12.8794	60.8703	49.3196	55.095	27.4691	50.5996	39.0344	4.27776	3.03076
ZHI#6.94_259.0667n	519.483	583.731	551.607	2332.33	2369.68	2351.01	687.708	578.026	632.867	4.26211	1.14731
AHI#4.59_392.1036m/z	32.3474	57.2608	44.8041	204.223	177.325	190.774	241.187	192.102	216.645	4.25797	4.83538
AHI#2.00_603.0145m/z	85.7276	50.5539	68.1408	371.992	208.122	290.057	116.377	181.77	149.073	4.25673	2.18773
AHI#9.36_647.3456m/z	346.284	332.887	339.585	1508.78	1375.28	1442.03	337.673	314.561	326.117	4.24645	0.96034
RPP#1.26_655.0381m/z	87.6071	125.242	106.425	391.477	511.329	451.403	63.4552	120.289	91.8722	4.24153	0.863262
ZHI#3.14_352.0153n	122.651	198.163	160.407	558.758	801.781	680.269	455.84	429.741	442.791	4.24089	2.76042
AHI#3.10_136.1891m/z	2955.52	2663.59	2809.56	13325.3	10297	11811.2	10274.8	9515.14	9894.98	4.20392	3.5219
RPP#13.51_886.8633m/z	10.0245	11.4686	10.7466	44.2847	46.0149	45.1498	32.6265	21.1711	26.8988	4.20133	2.50302
AHI#3.43_146.0810m/z	9880.94	10150.5	10015.7	40554.6	43528.8	42041.7	3432.67	3350.89	3391.78	4.19756	0.338645
AHI#1.69_451.0466n	812.145	775.416	793.78	3210.96	3430.05	3320.5	1080.45	1318.17	1199.31	4.18315	1.51088
ZHI#3.11_409.2938m/z	250.873	251.624	251.248	1033.8	1061.84	1047.82	106.728	113.747	110.238	4.17044	0.43876
RPP#1.59_322.9420m/z	76.1111	92.7908	84.451	320.992	381.486	351.239	131.036	104.926	117.981	4.15909	1.39704
AHI#1.27_393.0505m/z	147.035	101.476	124.256	634.697	397.806	516.251	185.175	157.015	171.095	4.15475	1.37696
ZHI#5.68_241.9779n	19.6786	29.7781	24.7284	98.1603	107.104	102.632	114.603	179.296	146.95	4.15037	5.94256
ZHI#6.58_204.9931m/z	26.0496	24.7637	25.4067	105.513	105.283	105.398	50.0584	26.352	38.2052	4.14844	1.50375
RPP#13.30_291.4928m/z	6.73849	5.5879	6.16319	31.6483	19.3316	25.4899	15.9615	17.4139	16.6877	4.13583	2.70764
RPP#1.38_275.9981m/z	188.182	186.433	187.307	719.908	827.911	773.909	189.592	186.776	188.184	4.13176	1.00468
AHI#3.09_531.1409m/z	454.745	464.445	459.595	2083.8	1712.89	1898.34	407.73	702.858	555.294	4.13047	1.20822
AHI#2.86_215.1641m/z	26.4218	48.5359	37.4788	82.0157	226.483	154.249	98.9873	159.293	129.14	4.11564	3.44568
ZHI#6.58_516.0880m/z	159.861	170.342	165.101	566.648	790.719	678.684	73.8497	87.5392	80.6945	4.11071	0.488757
ZHI#3.81_233.0437m/z	5484.58	5937.66	5711.12	23139.6	23782.2	23460.9	7835.7	7672.46	7754.08	4.10794	1.35772
AHI#1.91_436.0543m/z	79.2624	30.7992	55.0308	217.422	234.249	225.836	89.5821	71.1378	80.3599	4.10381	1.46027
ZHI#3.88_495.1985m/z	457.11	537.796	497.453	2104.78	1977.44	2041.11	489.664	362.933	426.298	4.10312	0.856961
AHI#2.46_388.0048n	58.5644	67.4891	63.0267	231.893	284.588	258.241	66.5627	72.5266	69.5447	4.09732	1.10342
RPP#5.40_121.0647m/z	31.6134	33.706	32.6597	130.178	137.346	133.762	33.4388	30.068	31.7534	4.09563	0.97225
AHI#9.95_723.6986m/z	9.17377	16.4532	12.8135	53.9739	50.9342	52.454	16.3106	29.8778	23.0942	4.09365	1.80233
ZHI#3.19_131.0712m/z	107569	107380	107475	430970	447249	439110	96472.2	97551.1	97011.7	4.08571	0.902648
AHI#10.11_462.6233m/z	21.3244	11.3215	16.3229	85.4733	47.7648	66.619	62.5574	76.2152	69.3863	4.08132	4.25085
AHI#3.26_377.0438m/z	42.7301	14.7535	28.7418	107.16	127.276	117.218	47.9134	26.9028	37.4081	4.0783	1.30152
RPP#1.33_369.0718m/z	4.47946	15.098	9.78875	32.3768	47.4343	39.9056	15.0499	1.51664	8.28327	4.07668	0.846203
ZHI#3.91_166.0627n	181067	176927	178997	716704	741396	729050	204650	204841	204746	4.07297	1.14385
AHI#1.93_192.1222m/z	3.27682	2.07221	2.67452	12.2677	9.48517	10.8764	58.452	62.8424	60.6472	4.06668	22.676
AHI#1.32_887.2882m/z	50.1662	52.3569	51.2615	248.667	168.072	208.37	39.5789	58.8731	49.226	4.06483	0.960291
AHI#10.83_216.9838m/z	7.45412	2.65489	5.05451	21.0434	20.0437	20.5435	138.225	160.856	149.54	4.0644	29.5855
AHI#1.22_417.0393m/z	14.997	0	7.4985	7.48747	53.3794	30.4334	87.0184	76.7193	81.8688	4.0586	10.918
AHI#2.19_173.0418m/z	561.492	562.689	562.091	2298.92	2206.06	2252.49	514.201	510.678	512.439	4.00734	0.911667
AHI#2.29_318.0085m/z	24.9529	55.6903	40.3216	139.36	182.757	161.058	97.7828	92.5484	95.1656	3.99434	2.36016
AHI#3.07_477.2553m/z	1165.38	1627.95	1396.67	5095.44	6054.61	5575.02	1064.03	1608.4	1336.22	3.99167	0.956718
AHI#2.15_355.9810m/z	154.105	86.5494	120.327	492.195	467.47	479.832	126.466	171.633	149.05	3.98772	1.2387
AHI#2.64_312.9604m/z	37.1385	23.4332	30.2858	131	110.5	120.75	31.4817	25.6017	28.5417	3.98701	0.94241
AHI#12.54_322.0042n	12.0702	13.5029	12.7865	44.351	57.4886	50.9198	29.8992	29.2114	29.5553	3.9823	2.31144
RPP#1.24_236.5465n	1094.57	1272.82	1183.7	4557.58	4843.8	4700.69	827.869	912.542	870.205	3.9712	0.73516
AHI#3.21_300.0445n	40.4566	21.6824	31.0695	114.817	131.755	123.286	20.8947	68.9634	44.929	3.96807	1.44608
AHI#2.43_123.9242n	15.0293	19.0474	17.0384	68.2206	66.8963	67.5584	23.6075	24.1987	23.9031	3.96508	1.4029
AHI#14.52_378.5316m/z	7.87548	5.38413	6.62981	34.454	18.092	26.273	9.22322	24.1436	16.6834	3.96286	2.51643
AHI#3.23_324.0848m/z	117.063	131.641	124.352	467.721	517.406	492.564	232.168	232.647	232.408	3.96105	1.86896
ZHI#7.99_662.1020m/z	360.897	338.594	349.746	1533.97	1226.91	1380.44	503.203	468.916	486.06	3.94699	1.38975
AHI#2.90_550.6286m/z	202.874	178.745	190.81	703.661	801.931	752.796	257.481	238.004	247.743	3.94527	1.29838
AHI#2.95_378.9603m/z	70.9498	71.5806	71.2652	294.562	267.298	280.93	205.004	132.963	168.983	3.94203	2.37119
AHI#3.50_486.9459m/z	15.4348	13.6949	14.5649	57.7378	56.8035	57.2706	35.9145	43.5584	39.7364	3.9321	2.72823
RPP#1.37_162.0265m/z	860.191	866.415	863.303	3190.46	3583.77	3387.11	1107.08	1153.99	1130.53	3.92343	1.30955
RPP#1.26_127.0150n	18188.4	17695.4	17941.9	69751.8	70788.1	70269.9	19566.4	20151.6	19859	3.91653	1.10685
AHI#5.32_440.9903m/z	3.81673	14.6251	9.22092	41.9497	30.1376	36.0436	17.3081	18.9048	18.1064	3.9089	1.96362
ZHI#6.07_323.1706m/z	192.245	233.167	212.706	789.282	871.363	830.323	652.805	625.22	639.013	3.90361	3.0042
RPP#1.02_112.5308m/z	3.92205	5.39703	4.65954	5.64356	30.5873	18.1154	19.4931	19.7209	19.607	3.88782	4.20792
ZHI#6.55_311.0434m/z	70.2206	47.543	58.8818	244.521	212.75	228.636	115.589	121.26	118.425	3.88296	2.01123
ZHI#5.65_236.9993m/z	28.5403	24.9869	26.7636	97.9243	109.434	103.679	365.383	361.327	363.355	3.87389	13.5765
AHI#2.91_277.9123m/z	10.5164	0	5.25819	15.7648	24.9324	20.3486	12.8741	10.5536	11.7138	3.86988	2.22773
AHI#3.02_448.2918m/z	37.2613	13.162	25.2116	69.2122	125.75	97.4811	0	17.6321	8.81604	3.86651	0.349681
AHI#2.60_233.0617m/z	1139.48	1070.68	1105.08	4295.08	4249.72	4272.4	1633.39	1753.11	1693.25	3.86615	1.53225
AHI#1.98_455.0606n	163.611	91.159	127.385	497.443	485.617	491.53	972.998	793.614	883.306	3.85862	6.93415
ZHI#1.75_301.1767m/z	4711.23	4868.45	4789.84	17524.8	19304.2	18414.5	5554.11	5420.99	5487.55	3.8445	1.14566
AHI#2.08_433.0336n	45.3011	35.2732	40.2871	159.991	149.328	154.66	159.403	120.619	140.011	3.83893	3.47534
AHI#3.47_698.5932m/z	17.8037	19.1168	18.4603	98.293	43.1621	70.7276	92.048	75.132	83.59	3.83134	4.5281
AHI#2.43_666.3908m/z	1282.93	1139.57	1211.25	4290.39	4972.21	4631.3	1783.02	1715.18	1749.1	3.82357	1.44404
AHI#3.07_606.4224m/z	455.267	266.244	360.755	1397.95	1356.79	1377.37	242.777	286.552	264.665	3.81802	0.733641
RPP#5.47_204.2069m/z	0.726915	3.61222	2.16957	9.16691	7.39647	8.28169	7.5412	8.54555	8.04338	3.81721	3.70737
AHI#2.36_578.3374m/z	3361.43	4193.69	3777.56	14093.7	14715.2	14404.5	5339.23	5436.99	5388.11	3.81317	1.42635
AHI#1.93_538.6457m/z	13.5322	9.1126	11.3224	51.387	34.893	43.14	2.74002	15.0218	8.88091	3.81016	0.784368
ZHI#6.14_187.0204m/z	51.6461	50.6722	51.1591	220.211	167.16	193.686	104.801	106.117	105.459	3.78595	2.06139
RPP#5.40_132.5308m/z	107.495	117.088	112.292	408.826	439.947	424.386	101.156	105.961	103.559	3.77933	0.92223
AHI#3.07_396.1977m/z	1776.47	2136.41	1956.44	7318.35	7467.36	7392.85	1544.94	2233.36	1889.15	3.77873	0.965607
RPP#3.21_156.1380m/z	9.09004	8.2374	8.66372	36.9144	28.4532	32.6838	35.6527	33.0685	34.3606	3.77249	3.96603
AHI#3.07_548.1159m/z	49.3309	12.4322	30.8815	123.733	108.977	116.355	11.7189	42.1381	26.9285	3.76779	0.871994
AHI#3.09_497.1322m/z	1140.1	1416.51	1278.3	5285.07	4343.74	4814.41	1122.36	1322.86	1222.61	3.76625	0.956432
AHI#2.36_683.7471m/z	20.0132	4.48429	12.2488	48.482	43.7026	46.0923	12.1728	0	6.08641	3.76302	0.4969
ZHI#6.53_616.2266m/z	228.56	238.436	233.498	870.793	884.405	877.599	425.946	417.512	421.729	3.75848	1.80613
RPP#5.25_183.1846m/z	3.89738	3.01841	3.4579	10.3174	15.622	12.9697	3.72408	9.82188	6.77298	3.75075	1.9587
RPP#13.58_148.9771m/z	0	1.27828	0.639138	2.69571	2.09708	2.39639	3.4552	2.74069	3.09795	3.74942	4.84707
ZHI#8.71_394.9552m/z	56.1119	80.8266	68.4692	219.14	293.709	256.424	116.8	132.619	124.709	3.74511	1.82139
AHI#1.36_975.3405m/z	90.1724	72.8069	81.4897	278.031	331.041	304.536	101.011	87.9532	94.482	3.73711	1.15944
AHI#2.59_243.0259m/z	51.8437	95.1802	73.5119	250.31	299.042	274.676	106.619	106.607	106.613	3.73648	1.45028
RPP#1.38_268.5082m/z	116.572	147.523	132.048	388.906	595.45	492.178	144.329	142.658	143.493	3.72727	1.08668
ZHI#6.07_211.0954n	15483.5	15634.8	15559.1	57914.4	57307.3	57610.8	29610	28867.1	29238.5	3.7027	1.87919
RPP#1.24_542.0455n	672.771	657.55	665.161	2388.69	2531.78	2460.24	404.183	316.546	360.365	3.69871	0.541771
AHI#12.34_708.0787m/z	30.6987	19.8946	25.2967	75.5193	111.319	93.4191	29.8038	18.8866	24.3452	3.69294	0.962389
RPP#12.89_551.9069m/z	47.8645	23.103	35.4838	177.081	84.4582	130.77	86.4654	41.5638	64.0146	3.68534	1.80405
RPP#1.21_664.1155m/z	152.86	253.58	203.22	690.855	802.88	746.867	242.181	266.856	254.518	3.67516	1.25243
AHI#3.07_446.0103n	1580.82	1443.92	1512.37	5776.96	5327.32	5552.14	1295.74	1172.08	1233.91	3.67115	0.815875
AHI#10.04_627.0302m/z	23.2795	39.0842	31.1818	104.088	124.737	114.413	19.7393	25.9669	22.8531	3.66921	0.732899
ZHI#6.45_117.0747m/z	64.8943	87.6248	76.2596	275.776	283.746	279.761	97.4066	118.033	107.72	3.66854	1.41254
AHI#2.67_504.4963m/z	16.743	17.3227	17.0328	66.5434	58.2993	62.4214	44.1926	34.6924	39.4425	3.66477	2.31568
AHI#3.17_256.0595m/z	66.0329	47.6434	56.8381	182.486	234.061	208.273	45.7579	82.0349	63.8964	3.66432	1.12418
AHI#8.24_288.0141m/z	34.7094	28.8944	31.8019	110.267	122.001	116.134	41.1237	43.3642	42.244	3.65179	1.32835
AHI#13.25_649.5667m/z	2.95617	13.9419	8.44906	39.6568	22.0049	30.8308	8.27983	2.34929	5.31456	3.64903	0.629012
RPP#5.40_240.0308n	72.5484	78.4444	75.4964	246.96	303.966	275.463	49.9117	41.3726	45.6421	3.6487	0.604561
AHI#2.08_171.9692m/z	49.9333	50.5533	50.2433	160.595	204.429	182.512	1451.31	1473.15	1462.23	3.63256	29.1029
AHI#12.01_197.6132m/z	7.36247	11.4495	9.406	34.5779	33.7535	34.1657	5.53714	9.8757	7.70642	3.63233	0.819309
AHI#1.17_146.1174m/z	608.221	546.521	577.371	2044.67	2144.72	2094.69	772.692	819.818	796.255	3.62799	1.37911
AHI#1.34_874.2415n	130.27	84.6758	107.473	407.5	367.701	387.6	146.671	148.306	147.489	3.60649	1.37233
ZHI#3.73_352.0496m/z	65.6209	24.4457	45.0333	179.848	144.466	162.157	123.706	63.9815	93.8436	3.60082	2.08387
ZHI#4.78_138.0921m/z	49.3306	49.6556	49.4931	174.393	181.805	178.099	41.2749	22.3367	31.8058	3.59846	0.642631
RPP#1.24_202.5545m/z	636.241	673.969	655.105	2314.38	2393.81	2354.09	533.005	492.051	512.528	3.59346	0.78236
AHI#1.48_524.7042n	336.311	290.936	313.624	1145.95	1103.67	1124.81	461.223	391.817	426.52	3.58649	1.35997
AHI#8.83_272.9810m/z	2.97395	10.7281	6.851	19.9549	29.1734	24.5642	15.0157	27.2825	21.1491	3.58548	3.08701
AHI#1.48_390.0505m/z	114.162	162.388	138.275	572.329	409.986	491.158	101.998	61.7912	81.8943	3.55204	0.592258
AHI#2.24_678.0700m/z	62.8792	108.743	85.8112	307.065	300.742	303.903	68.0986	46.5493	57.324	3.54153	0.668024
AHI#3.52_360.1054m/z	100.098	28.7767	64.4372	244.81	211.31	228.06	163.145	82.4772	122.811	3.53927	1.9059
RPP#7.68_472.3544m/z	20.8635	8.15732	14.5104	54.1443	47.7681	50.9562	38.8699	36.3688	37.6193	3.5117	2.59258
RPP#14.12_716.0482m/z	32.4685	5.20316	18.8358	97.4351	34.4893	65.9622	19.6995	0	9.84977	3.50195	0.522927
AHI#8.83_334.0905m/z	15.0478	51.6934	33.3706	108.126	125.341	116.733	38.8882	64.3501	51.6192	3.49809	1.54684
AHI#2.00_402.2314m/z	2979.46	2379.71	2679.58	9606.71	9127.25	9366.98	3233.81	3124.16	3178.99	3.49568	1.18637
ZHI#5.42_135.0543n	117675	119111	118393	416489	404446	410468	17928.9	17497.2	17713	3.46699	0.149612
AHI#2.12_566.0958m/z	66.4966	34.1362	50.3164	200.65	148.18	174.415	111.751	81.8573	96.8042	3.46636	1.92391
AHI#2.26_789.0733n	123.666	214.334	169	550.111	621.088	585.6	131.292	69.4332	100.362	3.46509	0.59386
RPP#1.40_209.5019m/z	67.232	56.3364	61.7842	195.975	231.209	213.592	75.9365	79.055	77.4958	3.45707	1.2543
ZHI#6.73_174.0016m/z	63.0129	97.1153	80.0641	285.483	267.034	276.259	147.156	150.382	148.769	3.45047	1.85812
RPP#1.49_450.0544m/z	288.585	300.851	294.718	995.506	1037.56	1016.53	252.394	330.77	291.582	3.44916	0.989358
RPP#2.95_110.5941m/z	8.56088	3.93531	6.2481	22.2372	20.7665	21.5018	8.53892	6.16725	7.35308	3.44134	1.17685
RPP#1.45_132.0165m/z	440.724	433.595	437.159	1273.26	1732.07	1502.66	535.243	521.885	528.564	3.43733	1.20909
AHI#1.98_417.0090n	103.701	88.2035	95.9521	324.138	333.99	329.064	179.321	247.535	213.428	3.42946	2.22431
RPP#6.24_228.1224m/z	92.1585	111.807	101.983	363.222	336.243	349.733	342.914	355.58	349.247	3.42933	3.42457
AHI#4.59_376.9892n	31.7942	32.38	32.0871	102.97	116.987	109.979	90.5005	60.452	75.4763	3.4275	2.35223
RPP#9.28_546.5557m/z	2.65585	1.84981	2.25283	15.4304	0	7.7152	6.99981	8.92656	7.96319	3.42467	3.53474
AHI#6.29_236.9986m/z	8.37891	2.54167	5.46029	18.275	19.0533	18.6642	14.9012	22.5668	18.734	3.41816	3.43095
AHI#5.04_290.8942m/z	6.54712	7.70017	7.12365	24.1205	24.493	24.3068	12.2288	11.6442	11.9365	3.41213	1.67561
AHI#2.95_388.3945m/z	22.1849	25.992	24.0884	71.9444	92.4077	82.176	22.8375	42.7544	32.796	3.41143	1.36148
AHI#3.55_760.6311m/z	432.425	277.358	354.892	1212.66	1202.64	1207.65	556.839	522.097	539.468	3.40286	1.52009
RPP#5.40_188.0445n	113.888	144.68	129.284	422.911	453.882	438.396	125.852	134.962	130.407	3.39095	1.00868
AHI#1.31_804.2960n	1131.12	1541.46	1336.29	5081.39	3966.75	4524.07	1538.65	1728.72	1633.68	3.38554	1.22255
AHI#2.95_593.3162m/z	179.371	314.496	246.933	752.041	918.259	835.15	374.243	252.72	313.482	3.38209	1.2695
RPP#13.20_551.9078m/z	213.038	40.3094	126.674	582.492	274.261	428.376	266.266	82.4539	174.36	3.38172	1.37645
AHI#6.32_243.0393m/z	5.82977	16.2115	11.0206	42.5499	31.9726	37.2613	20.0911	24.0162	22.0537	3.38104	2.00113
RPP#5.75_668.8221m/z	39.9074	51.214	45.5607	151.221	156.598	153.91	54.7138	56.2116	55.4627	3.37813	1.21734
AHI#5.52_315.0033m/z	58.7662	17.7753	38.2708	132.476	125.985	129.23	78.7098	76.1283	77.419	3.37674	2.02293
AHI#2.03_432.0474m/z	134.418	66.9573	100.688	341.234	336.04	338.637	395.185	402.376	398.78	3.36324	3.96056
RPP#13.74_689.5262m/z	28.247	36.9193	32.5832	117.044	102.031	109.537	40.5151	42.8363	41.6757	3.36178	1.27906
AHI#6.29_271.1893m/z	6.33332	6.0324	6.18286	24.8541	16.6673	20.7607	26.2526	30.3273	28.29	3.35779	4.57555
AHI#11.18_619.5923m/z	47.0464	80.3704	63.7084	254.259	172.65	213.455	39.9074	74.8301	57.3688	3.35049	0.90049
AHI#2.91_554.5837m/z	39.1325	6.0176	22.575	88.3137	62.8212	75.5675	80.6811	3.58623	42.1337	3.34739	1.86638
AHI#2.33_297.1499m/z	914.808	1221.6	1068.21	3315.92	3832.83	3574.38	949.135	974.505	961.82	3.34615	0.900407
RPP#1.26_667.0584m/z	73.8217	120.911	97.3665	300.904	350.64	325.772	80.6315	116.143	98.3872	3.34583	1.01048
AHI#5.20_516.0613m/z	33.0046	29.3941	31.1994	101.712	107.03	104.371	61.0735	74.4418	67.7577	3.34529	2.17176
AHI#2.07_378.0482n	266.41	325.375	295.893	1021.67	950.955	986.312	345.667	308.622	327.145	3.33334	1.10562
AHI#6.65_563.9873m/z	10.1572	23.7775	16.9673	51.2998	61.6514	56.4756	30.2287	41.7045	35.9666	3.32849	2.11975
AHI#1.95_526.1123n	339.787	301.121	320.454	1204.35	927.551	1065.95	483.682	403.196	443.439	3.32637	1.38378
ZHI#1.81_182.9796m/z	340.686	367.562	354.124	1185.82	1169.85	1177.84	216.104	195.905	206.005	3.32606	0.58173
AHI#3.02_146.0212m/z	62.2569	68.9746	65.6157	193.827	239.139	216.483	48.3896	68.9935	58.6916	3.29926	0.894474
ZHI#8.63_148.0002n	35.4444	35.8272	35.6358	110.224	124.872	117.548	1042.2	1094.5	1068.35	3.29859	29.9797
ZHI#1.16_315.2526m/z	683.823	585.751	634.787	2060.9	2124.91	2092.91	1204.33	1113.8	1159.06	3.29702	1.82591
AHI#3.17_583.9912m/z	159.405	108.482	133.944	446.48	434.452	440.466	222.309	245.968	234.139	3.28844	1.74804
AHI#13.24_370.1238m/z	23.9869	9.20218	16.5945	53.4019	55.4669	54.4344	24.8826	52.8567	38.8696	3.28026	2.34232
RPP#9.04_187.0068m/z	0	6.89855	3.44927	9.51569	13.0587	11.2872	3.53187	2.58135	3.05661	3.27234	0.886161
AHI#4.59_393.9720m/z	22.6425	21.988	22.3153	66.9178	78.8333	72.8755	41.9419	59.3187	50.6303	3.26573	2.26886
ZHI#5.78_257.0356n	41.87	47.0957	44.4828	149.893	140.159	145.026	1450.55	1460.29	1455.42	3.26027	32.7188
RPP#5.40_133.0322m/z	21.5403	24.8405	23.1904	78.1279	73.0829	75.6054	25.2687	25.4109	25.3398	3.26021	1.09269
ZHI#5.65_417.0030m/z	69.5819	48.2027	58.8923	197.212	186.628	191.92	2246.04	2053.02	2149.53	3.25883	36.4993
ZHI#8.43_336.1666m/z	355.223	391.789	373.506	1304.87	1127.66	1216.26	442.744	473.541	458.142	3.25635	1.2266
AHI#3.26_635.7190m/z	33.131	68.2306	50.6808	129.55	200.39	164.97	98.9604	63.8704	81.4154	3.25508	1.60643
AHI#4.66_853.0644m/z	21.3223	16.2959	18.8091	69.3388	52.7373	61.0381	35.7298	37.7927	36.7613	3.24514	1.95444
AHI#4.90_300.7882m/z	5.26167	14.7924	10.027	37.221	27.8362	32.5286	26.5768	11.9454	19.2611	3.24409	1.92092
RPP#1.45_155.0198m/z	4036.39	3940.36	3988.37	10847.5	15020.4	12933.9	4150.13	4325.69	4237.91	3.24291	1.06257
ZHI#8.17_171.0059m/z	406.317	480.386	443.351	1406.38	1468.53	1437.45	11730.1	11534.4	11632.2	3.24225	26.237
RPP#2.67_303.2022m/z	20.9474	12.8884	16.9179	43.4508	66.1719	54.8114	25.0537	31.3199	28.1868	3.23985	1.66609
AHI#3.23_285.0522m/z	46.1025	33.5369	39.8197	107.473	150.478	128.976	54.3053	57.1914	55.7484	3.23899	1.40002
AHI#2.95_308.0441m/z	89.1472	109.092	99.1198	339.709	301.785	320.747	148.496	127.17	137.833	3.23595	1.39057
AHI#3.07_462.0626m/z	1584.92	1485.25	1535.08	5130.42	4800.16	4965.29	1355.69	1424.66	1390.18	3.23454	0.905603
AHI#4.83_513.9410m/z	119.357	80.8817	100.119	300.883	346.764	323.823	287.855	243.877	265.866	3.23438	2.65549
ZHI#5.12_323.1721m/z	2131.51	2032.75	2082.13	6910.79	6533.19	6721.99	4041.2	3774.64	3907.92	3.22842	1.87689
AHI#3.31_294.0372m/z	113.984	104.681	109.333	365.056	339.491	352.273	101.49	70.4371	85.9635	3.22203	0.786255
AHI#3.07_351.0256m/z	35.8108	46.039	40.9249	152.63	110.736	131.683	24.5802	21.1832	22.8817	3.21768	0.559114
AHI#1.31_465.0576n	441.798	443.086	442.442	1457.74	1388.02	1422.88	629.37	542.947	586.159	3.21597	1.32482
AHI#2.31_184.1334m/z	32.2944	22.1997	27.2471	77.921	97.1821	87.5516	115.567	78.3616	96.9643	3.21325	3.55871
AHI#2.34_847.6999m/z	62.0643	100.565	81.3148	206.557	315.592	261.074	151.341	229.522	190.431	3.21066	2.3419
RPP#6.05_551.2488m/z	47.8195	23.6336	35.7265	118.481	110.02	114.251	57.0975	44.2478	50.6726	3.19792	1.41835
AHI#3.71_358.2960m/z	0	31.1703	15.5852	53.5932	46.0405	49.8168	29.0189	34.3875	31.7032	3.19643	2.03419
ZHI#5.04_439.1109m/z	154.023	85.5921	119.807	399.5	365.656	382.578	972.184	1106.63	1039.41	3.19328	8.67565
AHI#10.05_465.1561m/z	62.55	37.3599	49.9549	125.963	193.071	159.517	114.642	65.2319	89.9368	3.19321	1.80036
AHI#3.02_298.3466m/z	42.6934	34.3256	38.5095	141.302	104.012	122.657	53.4697	71.6075	62.5386	3.18511	1.62398
AHI#4.19_707.4911m/z	17.8835	59.1543	38.5189	127.959	116.969	122.464	163.239	95.4284	129.333	3.17933	3.35766
AHI#2.41_426.0614m/z	4.00199	5.18588	4.59394	7.48524	21.6936	14.5894	309.493	227.435	268.464	3.17579	58.4387
AHI#2.76_209.1375m/z	28.4765	14.6224	21.5495	93.6552	42.8621	68.2587	54.4434	61.3837	57.9136	3.16753	2.68747
AHI#3.48_314.2072m/z	30.3697	24.4559	27.4128	97.4488	76.1952	86.822	58.3668	56.4609	57.4139	3.16721	2.09442
ZHI#7.14_209.0663m/z	897.666	921.212	909.439	3017.16	2739.95	2878.56	1652.48	1656.65	1654.56	3.1652	1.81932
RPP#11.32_289.2919m/z	1.72921	2.48141	2.10531	6.1514	7.16847	6.65993	10.256	8.30936	9.28266	3.1634	4.40917
AHI#4.85_505.8953m/z	30.0036	19.4403	24.722	75.2484	81.1548	78.2016	61.8776	37.2194	49.5485	3.16324	2.00423
AHI#1.17_762.1120m/z	133.78	204.698	169.239	495.284	574.685	534.985	135.657	180.625	158.141	3.16111	0.934422
AHI#3.69_212.0376m/z	208.59	192.877	200.734	587.848	680.141	633.994	246.891	166.935	206.913	3.15839	1.03079
RPP#11.86_551.4024m/z	9.2229	6.8031	8.013	26.4916	24.0395	25.2656	21.2859	4.92978	13.1078	3.15307	1.63582
RPP#6.08_746.8669m/z	13.988	9.61551	11.8018	47.5536	26.8597	37.2067	50.1974	27.311	38.7542	3.15263	3.28376
RPP#11.79_897.5460m/z	7.31491	3.7476	5.53125	22.4239	12.4452	17.4346	7.01134	1.66088	4.33611	3.15201	0.783929
ZHI#6.42_368.1557m/z	1022.86	1033.1	1027.98	3247.27	3226.27	3236.77	987.144	1032.28	1009.71	3.14868	0.982232
AHI#3.07_785.9132m/z	178.11	227.828	202.969	653.892	622.58	638.236	412.72	564.718	488.719	3.1445	2.40785
ZHI#8.71_189.9872n	78.7013	93.8314	86.2663	289.479	252.768	271.123	154.939	114.386	134.662	3.14286	1.56101
AHI#3.07_763.8993m/z	19.9374	78.3231	49.1303	191.061	117.572	154.317	80.6124	116.727	98.6697	3.14097	2.00833
AHI#2.36_431.0181n	77.5503	33.7066	55.6284	158.587	190.475	174.531	118.2	65.1807	91.6904	3.13745	1.64826
RPP#1.52_186.5170m/z	104.279	97.2753	100.777	292.85	339.434	316.142	105.299	114.466	109.883	3.13704	1.09035
AHI#1.31_858.2712n	582.626	485.494	534.06	1671.38	1670.89	1671.13	752.758	663.583	708.17	3.12911	1.32601
ZHI#3.01_115.0760m/z	135.279	114.306	124.792	383.904	396.879	390.392	232.608	242.3	237.454	3.12833	1.90279
AHI#4.94_261.8245n	31.8181	35.7966	33.8073	116.717	94.6043	105.661	78.174	85.5825	81.8782	3.12538	2.42191
AHI#1.69_528.0712n	204.936	192.152	198.544	517.411	723.522	620.467	326.229	429.459	377.844	3.12508	1.90307
AHI#2.31_464.4596n	64.0581	49.377	56.7175	183.898	170.387	177.142	79.058	71.2457	75.1518	3.12324	1.32502
AHI#3.40_715.0499m/z	124.514	90.2066	107.361	415.847	253.535	334.691	198.446	70.8492	134.648	3.11745	1.25416
AHI#5.59_256.0166m/z	22.0335	35.1005	28.567	66.7506	111.21	88.9803	35.5747	44.7847	40.1797	3.11479	1.40651
AHI#2.39_417.0274m/z	30.964	42.2714	36.6177	85.6245	141.429	113.527	74.9074	92.5824	83.7449	3.10032	2.28701
AHI#7.32_857.2022m/z	37.1049	26.2503	31.6776	68.5318	127.755	98.1436	68.5739	65.8927	67.2333	3.0982	2.12243
AHI#11.21_586.0195m/z	15.9732	8.58107	12.2771	40.8968	35.1157	38.0062	12.7133	25.2732	18.9933	3.09569	1.54704
AHI#3.07_466.0565m/z	619.223	581.723	600.473	1887.41	1821.27	1854.34	472.112	485.028	478.57	3.08813	0.796989
ZHI#6.53_318.0638m/z	72.5865	88.8325	80.7095	237.562	260.911	249.236	103.624	142.17	122.897	3.08807	1.52271
RPP#13.98_300.2447m/z	3.88722	7.59281	5.74001	17.9717	17.4609	17.7163	13.4298	7.57328	10.5016	3.08645	1.82954
ZHI#5.68_266.0663m/z	198.099	82.3451	140.222	447.8	416.441	432.12	363.263	338.589	350.926	3.08169	2.50264
AHI#14.31_1001.4394m/z	15.8274	10.9507	13.389	41.4112	40.7164	41.0638	40.6906	48.1282	44.4094	3.06697	3.31685
RPP#2.57_350.1375m/z	191.165	114.855	153.01	476.58	461.632	469.106	49.1039	36.9679	43.0359	3.06585	0.281262
AHI#6.30_227.0638m/z	186.089	174.897	180.493	559.161	547.522	553.342	165.976	206.146	186.061	3.06573	1.03085
AHI#5.46_523.1126m/z	32.851	35.5529	34.2019	107.554	102.112	104.833	38.4572	35.6912	37.0742	3.06512	1.08398
ZHI#0.98_279.2330m/z	3324.69	3281.2	3302.95	10440.4	9805.04	10122.7	8592.34	8216.26	8404.3	3.06476	2.54448
AHI#5.47_359.0284m/z	70.0507	56.9152	63.483	233.415	155.491	194.453	99.9894	55.5733	77.7814	3.06307	1.22523
RPP#1.02_370.9462m/z	83.741	44.1043	63.9227	169.39	221.895	195.643	140.067	151.374	145.72	3.06062	2.27964
RPP#4.60_204.1046m/z	73.8773	52.6574	63.2674	199.403	186.657	193.03	175.93	173.942	174.936	3.05102	2.76502
AHI#3.07_506.3705m/z	501.811	454.161	477.986	1515.51	1399.02	1457.27	263.112	242.816	252.964	3.04876	0.529228
AHI#5.49_299.0239m/z	14.2838	22.9628	18.6233	56.0875	57.4035	56.7455	31.1997	38.4431	34.8214	3.04702	1.86978
AHI#3.19_200.1111m/z	75.1663	9.10743	42.1369	101.786	154.482	128.134	55.2128	36.4859	45.8493	3.0409	1.08811
AHI#2.43_430.8879m/z	25.5806	24.0318	24.8062	64.0685	86.648	75.3583	54.5265	51.2682	52.8974	3.03788	2.13242
ZHI#8.20_186.0766m/z	151.38	130.68	141.03	404.634	451.062	427.848	97.6048	187.432	142.519	3.03374	1.01056
RPP#1.26_390.0508m/z	222.951	242.996	232.974	646.414	762.449	704.431	242.874	243.743	243.308	3.02365	1.04436
AHI#3.74_457.1780m/z	232.168	177.924	205.046	640.406	594.874	617.64	342.938	0	171.469	3.0122	0.836247
AHI#3.78_333.0256m/z	162.566	125.031	143.798	442.126	423.731	432.928	136.02	130.801	133.41	3.01066	0.92776
AHI#4.68_854.1164m/z	75.2998	50.1953	62.7476	223.042	154.559	188.801	144.354	80.316	112.335	3.00889	1.79027
AHI#1.60_387.0138n	281.804	288.314	285.059	810.759	904.62	857.689	425.092	408.204	416.648	3.00882	1.46162
ZHI#6.68_523.1663m/z	167.222	173.131	170.177	514.8	509.229	512.014	141.898	112.958	127.428	3.00872	0.748798
AHI#1.01_418.2182m/z	72.5568	87.8132	80.185	200.738	281.356	241.047	81.1711	86.0278	83.5995	3.00614	1.04258
AHI#3.55_962.7966m/z	52.657	41.462	47.0595	86.7883	195.706	141.247	85.8793	101.052	93.4657	3.00146	1.98612
RPP#2.39_257.1790m/z	19.1488	24.9152	22.032	60.5937	71.5777	66.0857	36.7441	33.2658	35.0049	2.99953	1.58882
ZHI#10.12_412.2198m/z	136.683	132.882	134.782	380.26	427.976	404.118	191.96	126.182	159.071	2.99831	1.18021
RPP#9.56_314.6892m/z	4.20012	3.30381	3.75196	11.4	11.0897	11.2449	7.77458	10.0845	8.92952	2.99706	2.37996
ZHI#5.01_200.0384m/z	87.3291	79.9575	83.6433	272.1	229.107	250.604	96.5485	99.1004	97.8245	2.9961	1.16954
RPP#11.74_475.7253m/z	29.8336	4.05139	16.9425	58.1263	43.2447	50.6855	35.5422	15.1083	25.3253	2.99162	1.49478
ZHI#4.88_144.1027m/z	130.918	130.311	130.614	363.72	417.278	390.499	208.448	141.204	174.826	2.98971	1.33849
AHI#2.38_772.8228m/z	2.90139	15.9321	9.41675	28.4952	27.7822	28.1387	18.8558	9.23658	14.0462	2.98816	1.49162
RPP#4.15_879.6531m/z	7.94731	4.84286	6.39508	24.5217	13.6432	19.0824	8.96738	12.4368	10.7021	2.98393	1.67349
AHI#3.57_332.0760m/z	162.755	109.789	136.272	306.865	505.021	405.943	302.06	392.717	347.389	2.97892	2.54923
AHI#1.34_931.3164m/z	124.849	88.9611	106.905	312.336	323.599	317.968	89.4202	83.1982	86.3092	2.97431	0.807346
RPP#14.73_273.9154m/z	1.6327	4.32224	2.97747	5.42053	12.2912	8.85586	9.16711	12.0289	10.598	2.97429	3.55939
ZHI#3.99_327.1085m/z	9968.4	9959.06	9963.73	26254.7	32991	29622.9	6272.38	6605.57	6438.98	2.97307	0.646241
RPP#4.88_191.0126m/z	29.1926	30.7197	29.9561	99.8579	78.2409	89.0494	41.4358	26.5302	33.983	2.97266	1.13443
RPP#7.63_818.9638m/z	0.0426694	11.5506	5.79663	7.78951	26.6508	17.2201	28.8749	13.6572	21.266	2.97072	3.66869
AHI#3.50_473.3965m/z	6.30671	5.36252	5.83461	25.702	8.9483	17.3251	13.9566	7.34625	10.6514	2.96937	1.82556
AHI#1.05_318.8920m/z	3.69259	1.59192	2.64225	7.13358	8.52916	7.83137	90.4409	54.048	72.2444	2.9639	27.342
RPP#12.75_551.9080m/z	84.8607	15.4334	50.147	194.812	102.297	148.554	67.3261	24.8624	46.0943	2.96238	0.919182
AHI#2.10_142.9670n	13.1619	18.6924	15.9272	56.3095	37.9796	47.1445	120.278	125.994	123.136	2.96001	7.73121
AHI#3.29_192.0317m/z	31.6036	11.7032	21.6534	86.6098	41.3485	63.9792	49.4983	49.5563	49.5273	2.95469	2.28727
AHI#5.02_840.7904m/z	17.6771	40.3337	29.0054	52.3843	118.953	85.6688	59.2898	63.7129	61.5013	2.95354	2.12034
RPP#8.95_251.5910m/z	3.26604	2.63913	2.95258	7.61028	9.83077	8.72053	13.1359	8.37023	10.7531	2.95353	3.64192
AHI#2.98_294.0414m/z	154.55	178.864	166.707	437.057	546.782	491.919	88.6022	134.979	111.791	2.95081	0.670583
ZHI#1.40_214.9510m/z	62.6513	76.6196	69.6354	208.406	202.357	205.382	11.7114	17.5536	14.6325	2.94939	0.21013
AHI#5.75_270.9773m/z	18.7735	17.3511	18.0623	65.9824	40.4592	53.2208	33.5105	28.4865	30.9985	2.94651	1.7162
AHI#3.09_631.1809m/z	130.756	283.362	207.059	713.137	506.43	609.783	146.995	264.115	205.555	2.94498	0.992738
ZHI#6.53_666.1825m/z	137.783	82.1028	109.943	312.909	334.234	323.571	191.936	197.499	194.717	2.94308	1.77107
AHI#1.24_408.7128m/z	41.3051	33.7642	37.5346	89.4155	130.176	109.796	53.7304	26.6504	40.1904	2.92518	1.07075
AHI#4.63_850.3880m/z	30.7587	33.5234	32.141	93.4709	94.4146	93.9428	91.0456	86.0553	88.5505	2.92283	2.75506
AHI#1.29_547.0094m/z	56.6588	57.2703	56.9645	160.098	172.411	166.255	70.6373	47.9291	59.2832	2.91856	1.0407
RPP#11.95_152.4934m/z	1.41225	3.6816	2.54692	7.80566	7.05988	7.43277	5.08706	5.45776	5.27241	2.91833	2.07011
AHI#2.34_962.6800m/z	49.5173	82.098	65.8077	186.786	196.916	191.851	95.1253	69.9874	82.5564	2.91533	1.25451
ZHI#2.32_135.0305m/z	18.8226	21.7559	20.2892	52.1062	65.9963	59.0513	69.5695	104.748	87.1587	2.91047	4.29581
AHI#3.73_361.9542m/z	26.1266	24.2597	25.1932	69.2694	77.1894	73.2294	39.1414	12.8105	25.976	2.90672	1.03107
AHI#3.09_344.0468n	332.779	404.737	368.758	1180.23	963.15	1071.69	341.815	395.869	368.842	2.90621	1.00023
ZHI#5.09_331.0131m/z	993.434	856.404	924.919	2865.58	2509.7	2687.64	41.9037	78.3038	60.1037	2.90581	0.0649827
ZHI#6.68_501.1825m/z	216.605	258.965	237.785	711.014	669.519	690.267	295.087	273.843	284.465	2.9029	1.19631
AHI#2.31_247.0172m/z	26.1775	25.4336	25.8056	81.5663	68.0099	74.7881	9.0475	31.0065	20.027	2.89814	0.776074
AHI#7.96_258.0949m/z	1333.16	1135.97	1234.57	3846.58	3307.46	3577.02	844.632	845.623	845.128	2.89739	0.684554
AHI#3.02_310.0664n	168.601	149.795	159.198	482.505	437.888	460.197	194.293	163.162	178.727	2.89072	1.12267
AHI#5.33_453.4655m/z	7.14349	8.80539	7.97444	13.5338	32.5484	23.0411	19.795	20.8305	20.3127	2.88936	2.54723
AHI#1.44_497.7278m/z	197.479	156.427	176.953	504.166	517.778	510.972	229.405	214.028	221.716	2.88761	1.25296
AHI#3.05_468.3524m/z	54.9238	20.2506	37.5872	140.399	76.5331	108.466	0	27.0844	13.5422	2.88571	0.360288
ZHI#8.14_572.5635m/z	5.23366	13.3474	9.29055	34.1209	19.4897	26.8053	26.1362	10.2147	18.1755	2.88522	1.95634
AHI#6.75_337.0483m/z	31.6976	12.8597	22.2786	81.1305	47.1649	64.1477	42.3022	39.6021	40.9521	2.87934	1.83818
AHI#3.07_609.4385n	2115.93	2133.38	2124.65	6344.89	5859.05	6101.97	965.059	1084.52	1024.79	2.87199	0.482332
AHI#2.15_395.0524m/z	104.623	63.9299	84.2765	240.617	243.307	241.962	133.889	82.7778	108.333	2.87105	1.28545
RPP#1.73_150.0772m/z	148.201	134.648	141.425	405.508	404.838	405.173	5.58711	16.1084	10.8477	2.86494	0.0767034
AHI#2.24_384.1993n	9268.69	9953.43	9611.06	27198.6	27840.1	27519.4	11255.2	11148.9	11202.1	2.8633	1.16554
ZHI#2.60_146.0250m/z	9.94849	0	4.97424	6.37258	22.0979	14.2352	7.86116	17.5085	12.6848	2.86179	2.5501
AHI#1.13_574.3073m/z	436.364	451.891	444.127	1196.57	1344.91	1270.74	436.561	337.273	386.917	2.8612	0.871185
AHI#3.74_597.9985m/z	49.8928	32.8645	41.3787	75.0788	161.592	118.335	66.7559	156.437	111.596	2.85982	2.69696
ZHI#6.58_385.1024m/z	12.1159	0	6.05794	13.5923	21.054	17.3231	30.645	86.5042	58.5746	2.85958	9.66905
AHI#4.63_664.0449m/z	45.3107	78.8743	62.0925	148.718	205.808	177.263	171.366	79.638	125.502	2.85483	2.02121
ZHI#5.68_127.0015m/z	86.6397	85.1536	85.8967	267.283	222.335	244.809	549.393	551.128	550.26	2.85004	6.40607
RPP#3.26_349.8122m/z	64.1189	54.5424	59.3306	176.036	161.799	168.917	53.1975	53.7365	53.467	2.84705	0.90117
RPP#1.02_135.0112m/z	19.2966	25.0515	22.1741	46.6168	79.6439	63.1303	46.6226	43.7453	45.1839	2.84703	2.03769
AHI#2.24_690.1541m/z	55.1555	68.6199	61.8877	164.767	187.545	176.156	60.0232	29.1339	44.5786	2.84638	0.720314
AHI#1.25_391.0531m/z	110.857	100.021	105.439	315.135	284.891	300.013	97.0252	110.503	103.764	2.84537	0.984115
RPP#7.34_115.5649m/z	0.992577	2.60033	1.79645	4.69809	5.52104	5.10957	5.61069	6.98003	6.29536	2.84425	3.50433
AHI#8.39_858.9097m/z	28.4529	54.5273	41.4901	136.251	99.3843	117.818	78.2009	59.5303	68.8656	2.83966	1.65981
AHI#2.84_221.0031m/z	10.8418	13.0823	11.962	35.453	32.4752	33.9641	407.505	343.392	375.448	2.83932	31.3866
AHI#2.19_681.1161m/z	25.7201	22.4761	24.0981	57.7623	79.0739	68.4181	51.6157	54.3851	53.0004	2.83915	2.19936
RPP#10.87_608.6837m/z	0	11.8454	5.92271	10.542	23.041	16.7915	11.0312	18.2092	14.6202	2.83511	2.4685
RPP#7.68_292.0116m/z	6.48884	1.32595	3.90739	11.6375	10.5022	11.0699	14.363	7.66109	11.012	2.83305	2.81826
RPP#1.51_302.4940m/z	102.006	64.6133	83.3098	222.695	249.165	235.93	93.368	109.487	101.428	2.83196	1.21747
AHI#5.84_302.0368m/z	14.7461	31.5861	23.1661	61.5088	69.5363	65.5226	10.3516	4.63002	7.4908	2.82838	0.323352
AHI#3.19_451.2417m/z	99.2123	59.8848	79.5485	193.062	256.742	224.902	37.269	30.08	33.6745	2.82723	0.42332
ZHI#5.83_709.3937m/z	27.4938	54.4855	40.9896	117.381	114.26	115.821	146.101	148.821	147.461	2.82561	3.59751
AHI#13.70_822.6766m/z	4.07293	45.544	24.8085	99.651	40.4823	70.0667	95.8324	51.0145	73.4235	2.8243	2.95961
RPP#5.35_168.1016m/z	22.4674	28.0345	25.251	76.5833	65.2079	70.8956	86.9389	75.5408	81.2398	2.80764	3.21729
ZHI#1.58_315.1920m/z	2750.76	2692.43	2721.6	7503.07	7778.98	7641.02	2866.72	2974.18	2920.45	2.80755	1.07307
AHI#2.90_494.5659m/z	125.673	132.078	128.876	302.535	420.588	361.561	141.271	126.27	133.77	2.8055	1.03798
ZHI#6.22_378.0896m/z	454.784	461.873	458.329	1284.69	1283.97	1284.33	390.567	301.232	345.899	2.8022	0.754698
AHI#1.95_633.8695m/z	48.8018	11.7685	30.2852	83.9409	85.4807	84.7108	50.5974	62.0176	56.3075	2.7971	1.85924
RPP#1.92_139.1111m/z	4.10931	2.71083	3.41007	10.8008	8.25823	9.52951	4.32398	9.2645	6.79424	2.79452	1.99241
AHI#16.37_142.5891m/z	6.465	4.90224	5.68362	18.5609	13.1335	15.8472	9.91348	7.4018	8.65764	2.78822	1.52326
RPP#7.65_362.9738m/z	18.8719	6.49384	12.6829	39.9142	30.7746	35.3444	12.9487	17.0718	15.0102	2.78678	1.1835
AHI#3.52_552.5345m/z	9.09586	38.637	23.8664	67.7014	65.3071	66.5043	128.432	136.576	132.504	2.78652	5.5519
ZHI#8.89_634.0760m/z	13.1838	11.695	12.4394	36.526	32.7649	34.6454	29.6791	36.762	33.2206	2.78514	2.67059
AHI#1.31_529.4183m/z	47.8859	9.02418	28.455	99.147	59.0569	79.102	154.826	7.85355	81.3398	2.77989	2.85854
AHI#3.90_688.1296m/z	205.027	159.994	182.511	516.691	497.788	507.239	242.29	266.708	254.499	2.77923	1.39443
RPP#2.43_221.5241m/z	3.54006	7.01566	5.27786	13.8914	15.411	14.6512	14.4042	4.80391	9.60406	2.77597	1.81969
RPP#13.16_607.7003m/z	23.6278	16.0307	19.8293	52.8127	57.277	55.0448	48.1432	64.8857	56.5144	2.77594	2.85005
AHI#1.46_148.0964m/z	137.951	140.509	139.23	384.981	387.872	386.426	441.888	419.208	430.548	2.77546	3.09235
AHI#3.09_206.9662m/z	5.12138	6.06683	5.5941	19.6727	11.3259	15.4993	2.05719	5.22231	3.63975	2.77066	0.650641
AHI#1.98_581.6889m/z	73.6964	43.1157	58.4061	188.845	134.76	161.803	39.1162	30.9151	35.0156	2.77031	0.59952
AHI#2.24_347.0178n	39.1084	94.6494	66.8789	165.186	205.272	185.229	117.484	117.979	117.732	2.76962	1.76037
ZHI#1.01_355.2491m/z	391.733	391.554	391.644	1095.3	1071.91	1083.6	541.87	491.043	516.457	2.7668	1.31869
ZHI#6.94_140.1075m/z	41.227	37.9723	39.5996	96.7899	122.338	109.564	50.2338	65.5474	57.8906	2.7668	1.4619
ZHI#8.02_544.9482m/z	14.6869	21.9141	18.3005	50.7972	50.4504	50.6238	118.716	75.3724	97.0441	2.76625	5.30281
AHI#5.99_655.0623m/z	158.049	125.023	141.536	379.508	402.751	391.13	319.957	189.348	254.653	2.76347	1.79921
RPP#1.00_286.0513m/z	47.7343	109.468	78.6012	111.002	323.018	217.01	158.241	203.848	181.044	2.7609	2.30333
ZHI#7.14_420.1987m/z	7801.02	8016.28	7908.65	21940.2	21726.7	21833.5	8647.01	9006.91	8826.96	2.76071	1.11611
ZHI#7.01_217.0826m/z	587.652	596.524	592.088	1551.21	1717.52	1634.37	630.087	633.717	631.902	2.76034	1.06724
RPP#1.04_600.8967m/z	56.0759	54.554	55.3149	140.886	164.009	152.447	56.1661	53.2669	54.7165	2.75599	0.989181
ZHI#1.47_263.0220m/z	566.061	631.945	599.003	1553.04	1745.82	1649.43	225.832	256.982	241.407	2.75363	0.403015
AHI#4.16_583.0718m/z	49.1256	80.9504	65.038	162.288	194.969	178.628	117.025	148.003	132.514	2.74652	2.03748
AHI#5.21_912.0315m/z	4.37648	15.9873	10.1819	25.1097	30.8103	27.96	58.6772	37.9393	48.3082	2.74606	4.74453
ZHI#4.71_236.0930m/z	79069.4	84659.6	81864.5	228303	221174	224738	81876.5	82249.3	82062.9	2.74525	1.00242
AHI#3.09_789.9272n	863.832	1087.61	975.721	2779.91	2576.49	2678.2	3998.58	4868.49	4433.53	2.74484	4.54385
AHI#3.93_184.1059n	10517.4	10947.9	10732.6	29191.2	29691.2	29441.2	23657.2	25527.2	24592.2	2.74315	2.29135
RPP#12.38_476.7423m/z	15.61	18.0394	16.8247	46.1929	45.8331	46.013	27.9602	18.324	23.1421	2.73485	1.37548
AHI#3.17_135.8063m/z	339.693	187.582	263.638	850.58	591.359	720.97	1288.45	438.357	863.401	2.7347	3.27495
AHI#16.50_319.9882m/z	10.4864	3.86365	7.17502	31.6005	7.63159	19.616	6.66563	12.6559	9.66075	2.73393	1.34644
RPP#6.24_182.1179m/z	109.363	120.812	115.088	320.424	307.544	313.984	335.993	334.696	335.345	2.72822	2.91382
AHI#3.07_526.3372m/z	2996	3019.7	3007.85	7855.31	8553.33	8204.32	1892.21	1941.47	1916.84	2.72763	0.637279
ZHI#5.89_296.0502m/z	232.644	291.531	262.087	660.666	766.223	713.445	136.366	203.413	169.889	2.72216	0.648217
ZHI#7.86_376.2710m/z	17.3895	23.2705	20.33	68.2543	42.2032	55.2287	41.3265	53.6168	47.4717	2.71662	2.33506
ZHI#5.17_652.3685m/z	342.915	495.005	418.96	1116.5	1158.9	1137.7	695.775	658.627	677.201	2.71553	1.61639
RPP#14.45_732.5537m/z	565090	66803.7	315947	1.22549e+06	489660	857574	614724	163909	389317	2.7143	1.23222
ZHI#6.55_780.1972m/z	13.1315	20.3028	16.7172	41.2437	49.3411	45.2924	32.6273	24.1556	28.3914	2.70933	1.69834
RPP#7.93_366.9407m/z	9.61258	11.7553	10.6839	21.0268	36.8614	28.9441	17.4588	29.7641	23.6114	2.70913	2.21
AHI#1.24_368.0305m/z	34.8782	85.0582	59.9682	153.501	171.263	162.382	2.89819	59.5764	31.2373	2.7078	0.520898
AHI#5.13_164.9950m/z	34.87	43.3204	39.0952	116.524	95.0794	105.802	86.2554	73.0313	79.6434	2.70626	2.03716
RPP#8.55_386.9113m/z	4.05167	5.68693	4.8693	19.5048	6.73747	13.1211	5.6188	15.4984	10.5586	2.69466	2.1684
AHI#12.23_261.0365m/z	25.0044	12.8224	18.9134	57.253	44.6734	50.9632	22.6986	18.516	20.6073	2.69456	1.08956
AHI#12.86_762.6908m/z	28.9356	25.569	27.2523	60.5953	86.1994	73.3974	41.1009	67.9587	54.5298	2.69326	2.00093
ZHI#5.60_253.0351m/z	310.72	299.991	305.356	839.053	804.106	821.58	119.699	115.939	117.819	2.69057	0.385841
RPP#3.44_121.0391m/z	6.77176	2.76487	4.76832	10.4077	15.2467	12.8272	10.8818	8.56378	9.72279	2.69009	2.03904
AHI#5.59_483.4962m/z	6.18507	9.70839	7.94673	22.5622	20.122	21.3421	9.67917	30.3415	20.0103	2.68565	2.51806
AHI#15.54_369.1260m/z	6.98873	6.13075	6.55974	15.273	19.9494	17.6112	4.60212	4.45402	4.52807	2.68474	0.690283
AHI#4.64_257.0300n	157.304	108.272	132.788	359.505	353.411	356.458	205.702	195.116	200.409	2.6844	1.50923
ZHI#1.73_258.0445m/z	27.1424	129.801	78.4716	213.424	207.696	210.56	161.026	82.2618	121.644	2.68327	1.55016
AHI#2.95_312.3620m/z	51.5376	74.837	63.1873	148.824	189.382	169.103	76.5142	42.8875	59.7009	2.67622	0.944823
AHI#3.07_648.4704m/z	326.68	299.961	313.321	903.202	772.079	837.641	264.183	254.679	259.431	2.67343	0.828005
AHI#2.39_253.0664m/z	185.21	152.895	169.053	429.532	473.228	451.38	337.882	307.463	322.672	2.67006	1.90871
RPP#1.33_220.0336m/z	2963.98	2180.21	2572.09	7396.59	6331.55	6864.07	2671.41	2337.41	2504.41	2.66867	0.973686
RPP#1.02_542.8895m/z	73.1864	73.8828	73.5346	170.796	221.51	196.153	140.372	132.752	136.562	2.66749	1.85711
RPP#4.99_120.9241m/z	5.01423	4.50086	4.75755	11.6429	13.7232	12.6831	8.01324	15.0121	11.5127	2.66588	2.41987
AHI#2.45_736.9341m/z	28.85	21.9023	25.3761	60.9676	74.3013	67.6344	33.7163	30.2148	31.9656	2.66528	1.25967
AHI#6.80_325.1864m/z	1364.83	1574.58	1469.71	3713.78	4116.26	3915.02	2333.17	2597.36	2465.26	2.66381	1.67738
ZHI#10.56_349.1877m/z	20.783	39.6412	30.2121	76.4329	84.4771	80.455	59.1435	57.7114	58.4275	2.66301	1.93391
ZHI#6.32_261.1241m/z	5362.71	5395.02	5378.87	14385.7	14213.5	14299.6	1783.04	1819.18	1801.11	2.65849	0.334849
ZHI#7.04_261.0587m/z	628.127	644.752	636.44	1639.25	1743.67	1691.46	1334.39	1365.34	1349.86	2.65769	2.12096
AHI#1.20_314.9805m/z	11.5338	3.746	7.6399	18.6594	21.9094	20.2844	207.247	187.629	197.438	2.65506	25.843
ZHI#7.50_128.0713m/z	42.4397	30.8309	36.6353	120.163	74.3445	97.2538	63.2529	64.9329	64.0929	2.65465	1.74948
AHI#1.46_519.7416m/z	361.354	242.309	301.831	811.921	790.359	801.14	405.967	361.715	383.841	2.65426	1.27171
AHI#2.88_508.3988m/z	27.1105	32.307	29.7088	84.7343	72.793	78.7636	40.1068	62.2631	51.1849	2.65119	1.72289
RPP#1.63_161.4847m/z	73.5252	84.9922	79.2587	212.365	207.787	210.076	105.477	94.8591	100.168	2.65051	1.26381
AHI#4.69_920.5961m/z	37.7473	52.7579	45.2526	116.167	123.716	119.941	23.3253	33.9754	28.6503	2.65048	0.63312
ZHI#4.88_189.0960m/z	1133.62	1061.81	1097.71	2997.35	2809.01	2903.18	1423.56	1205.94	1314.75	2.64475	1.19772
ZHI#5.78_171.9860m/z	104.429	78.2021	91.3156	278.854	203.85	241.352	759.005	694.226	726.616	2.64305	7.95719
AHI#13.24_323.4917m/z	22.3497	22.9965	22.6731	60.2709	59.4042	59.8375	40.1893	45.5552	42.8722	2.63914	1.89089
ZHI#9.22_761.4658m/z	14.8298	0	7.41492	22.0239	17.1116	19.5677	33.6754	15.521	24.5982	2.63897	3.31739
AHI#1.01_460.7769m/z	23.61	47.9946	35.8023	110.187	78.583	94.3848	59.6746	21.9608	40.8177	2.63628	1.14009
ZHI#1.06_217.0508m/z	148.913	109.17	129.042	349.818	330.371	340.094	158.249	151.687	154.968	2.63554	1.20091
AHI#8.43_796.8022m/z	27.7837	22.4039	25.0938	83.5727	48.6907	66.1317	44.7646	18.2312	31.4979	2.63538	1.25521
AHI#3.47_304.9804m/z	18.7298	19.9809	19.3553	61.1861	40.7351	50.9606	87.8564	46.6344	67.2454	2.6329	3.47426
ZHI#9.45_665.3373m/z	69.8851	67.8578	68.8714	203.738	158.826	181.282	119.352	72.8915	96.1215	2.63218	1.39567
ZHI#2.55_221.0120m/z	1695.28	1678.46	1686.87	3876.5	4999.24	4437.87	1563.03	1527.76	1545.39	2.63083	0.91613
AHI#3.07_322.9427m/z	5.25574	7.5595	6.40762	18.5425	15.1708	16.8567	3.40072	11.4621	7.43139	2.63072	1.15977
AHI#4.14_273.3196n	41.3315	37.9783	39.6549	122.022	86.3758	104.199	118.806	164.36	141.583	2.62764	3.57037
AHI#11.11_150.9761m/z	10.3033	13.9209	12.1121	35.7934	27.7899	31.7916	22.8854	18.4442	20.6648	2.62479	1.70613
RPP#11.96_294.4973m/z	7.57335	3.11818	5.34577	10.63	17.4118	14.0209	12.1909	7.42912	9.81	2.6228	1.8351
ZHI#10.04_653.3226m/z	71.7615	74.6063	73.1839	170.263	213.206	191.734	149.053	148.968	149.011	2.6199	2.03611
AHI#3.23_811.4816m/z	210.73	108.123	159.426	330.836	504.486	417.661	178.96	205.005	191.983	2.61977	1.20421
ZHI#7.19_358.2214n	4491.25	4830.03	4660.64	12129.7	12275	12202.4	5043.56	4904.14	4973.85	2.61817	1.0672
ZHI#3.60_274.0183m/z	15.8991	15.5779	15.7385	43.2061	39.1996	41.2029	1595.41	1547.55	1571.48	2.61797	99.8497
AHI#3.69_359.0914m/z	503.919	488.113	496.016	1213.25	1381.86	1297.55	532.493	480.09	506.291	2.61595	1.02072
AHI#10.71_629.1037m/z	13.447	18.5737	16.0104	55.9492	27.7892	41.8692	66.8707	29.8688	48.3697	2.61513	3.02115
AHI#6.84_747.8036m/z	4.7938	2.68526	3.73953	8.28324	11.2746	9.77891	20.0375	3.88509	11.9613	2.61501	3.19861
AHI#1.15_618.3338m/z	781.96	586.271	684.115	1712.39	1864.5	1788.44	534.277	672.579	603.428	2.61424	0.882056
ZHI#6.27_360.0719m/z	73.6691	105.274	89.4717	256.667	211.078	233.872	144.329	165.416	154.873	2.61393	1.73097
AHI#3.07_695.6071n	692.393	944.727	818.56	2233.49	2044.57	2139.03	845.145	885.443	865.294	2.61316	1.05709
RPP#13.09_540.6816m/z	16.4238	3.70546	10.0646	26.1401	26.4446	26.2923	3.84036	26.0003	14.9203	2.61236	1.48246
AHI#1.82_522.9880m/z	113.448	54.9499	84.1991	259.749	179.733	219.741	68.6878	31.8677	50.2777	2.60978	0.597129
AHI#8.12_249.0514n	472.384	414.072	443.228	1162.95	1149.91	1156.43	454.382	457.64	456.011	2.6091	1.02884
RPP#2.32_212.1028m/z	12207.9	12169.3	12188.6	31587.9	31941.6	31764.8	7775.2	7981.43	7878.32	2.60611	0.646368
AHI#1.74_461.0260m/z	58.5714	62.3009	60.4361	149.823	165.097	157.46	76.278	92.3633	84.3206	2.60539	1.3952
AHI#3.57_392.0961m/z	1112.57	999.24	1055.91	2683.2	2818.38	2750.79	2960.71	2198.23	2579.47	2.60514	2.4429
AHI#10.23_207.0147m/z	7.70356	17.1159	12.4097	22.4381	42.1419	32.29	7.63509	9.84679	8.74094	2.60199	0.704362
AHI#2.34_121.1009m/z	12.4158	14.2677	13.3418	34.6731	34.7481	34.7106	18.3641	20.233	19.2986	2.60165	1.44648
RPP#5.39_787.3770m/z	597.771	406.594	502.182	2214.39	397.378	1305.88	369.526	390.385	379.956	2.60041	0.756608
ZHI#5.55_246.1344m/z	455.549	469.923	462.736	1217.1	1186.82	1201.96	814.775	818.326	816.551	2.59751	1.76462
RPP#3.07_208.0805m/z	78.8099	76.4854	77.6477	213.234	189.97	201.602	160.038	179.874	169.956	2.59637	2.18881
RPP#1.68_125.0709m/z	156.578	139.89	148.234	403.733	365.627	384.68	85.6738	99.9112	92.7925	2.59509	0.625986
AHI#16.09_123.9403m/z	2.56041	4.53991	3.55016	9.95346	8.45125	9.20236	7.94625	9.18153	8.56389	2.59209	2.41225
RPP#4.22_1215.5844m/z	9.77774	5.58202	7.67988	15.3851	24.4279	19.9065	9.51078	11.1009	10.3058	2.59203	1.34193
AHI#1.01_156.1017m/z	198.577	280.842	239.709	610.253	632.168	621.211	232.157	210.534	221.345	2.59151	0.92339
RPP#6.59_309.9905m/z	7.11058	7.0063	7.05844	13.2098	23.3396	18.2747	21.5237	9.79366	15.6587	2.58906	2.21843
RPP#1.38_418.9807m/z	2026.48	2003.8	2015.14	5088.12	5346.19	5217.16	2102.73	2366.99	2234.86	2.58898	1.10903
AHI#1.01_593.8673m/z	58.624	128.137	93.3807	256.932	226.367	241.649	125.819	94.304	110.062	2.58779	1.17863
AHI#2.41_377.0019m/z	36.5366	37.5092	37.0229	87.3253	104.222	95.7735	27.4806	33.3359	30.4083	2.58687	0.821336
RPP#1.64_259.0106m/z	18.1377	0	9.06883	22.6013	24.3122	23.4567	0	0.0300629	0.0150315	2.58652	0.00165749
AHI#3.29_248.1027m/z	439.343	441.055	440.199	1168.51	1108.53	1138.52	967.929	993.159	980.544	2.58637	2.2275
RPP#12.19_497.7385m/z	26.8108	5.21922	16.015	50.7434	32.0648	41.4041	62.5608	21.3156	41.9382	2.58533	2.61869
RPP#10.38_797.0461m/z	14.2204	1.76842	7.99441	22.9635	18.3506	20.657	20.0383	21.6023	20.8203	2.58393	2.60436
AHI#3.73_314.0307m/z	23.1978	11.1126	17.1552	48.0339	40.6	44.3169	24.5905	19.1583	21.8744	2.5833	1.27509
RPP#9.55_404.2770m/z	7.10053	1.54095	4.32074	15.8696	6.44209	11.1558	3.08355	7.43004	5.2568	2.58193	1.21664
RPP#4.32_190.1068m/z	71.3099	53.0104	62.1602	165.269	155.627	160.448	105.987	93.488	99.7377	2.5812	1.60453
RPP#9.16_193.1592m/z	5.73365	2.45428	4.09396	10.3903	10.7069	10.5486	8.68562	9.03343	8.85953	2.57662	2.16405
AHI#2.15_259.0025n	96.3052	119.565	107.935	236.185	319.933	278.059	86.2115	71.1893	78.7004	2.57617	0.729145
AHI#7.76_150.9765m/z	20.1406	14.875	17.5078	45.7904	44.3927	45.0916	35.5971	35.672	35.6346	2.57551	2.03535
RPP#14.31_898.4782m/z	28.2546	11.4896	19.8721	55.3378	46.9442	51.141	29.7	24.5273	27.1137	2.57351	1.36441
AHI#4.57_360.9496m/z	46.4045	52.8281	49.6163	119.469	135.793	127.631	85.3461	93.6447	89.4954	2.57236	1.80375
RPP#1.05_602.8858m/z	36.0433	22.9171	29.4802	49.3282	102.238	75.783	38.7103	35.4031	37.0567	2.57064	1.257
ZHI#7.84_646.1582m/z	84.854	76.0275	80.4407	176.177	236.484	206.33	227.027	310.219	268.623	2.565	3.33939
AHI#2.65_732.6351m/z	84.7919	71.3209	78.0564	159.479	240.864	200.172	271.072	124.233	197.652	2.56445	2.53217
ZHI#2.24_435.1152m/z	229.997	239.727	234.862	531.585	672.237	601.911	189.296	142.198	165.747	2.56283	0.70572
AHI#2.08_610.7047m/z	195.527	143.11	169.318	439.776	427.206	433.491	82.5749	62.0201	72.2975	2.56021	0.426992
AHI#2.19_298.9462m/z	11.6267	4.02101	7.82385	13.5668	26.4281	19.9975	368.887	385.411	377.149	2.55596	48.2051
AHI#3.52_265.2533m/z	11.0221	3.45696	7.23953	19.4062	17.5984	18.5023	25.0255	15.9938	20.5096	2.55573	2.83301
AHI#3.07_613.4199n	1853.92	1973.58	1913.75	5038.81	4735.46	4887.13	897.261	1354.03	1125.65	2.55369	0.588188
ZHI#1.22_278.2691n	7403.98	7180.68	7292.33	18103	19141.2	18622.1	20113.4	19980.9	20047.1	2.55366	2.74907
AHI#2.36_329.2686m/z	76.1937	67.4547	71.8242	118.119	248.545	183.332	115.875	131.199	123.537	2.55251	1.71999
AHI#1.93_417.0403m/z	82.4485	19.0484	50.7485	146.827	112.244	129.536	135.449	144.937	140.193	2.5525	2.7625
RPP#1.77_252.9862m/z	8.03508	6.8631	7.44909	22.6855	15.3259	19.0057	144.068	153.198	148.633	2.55142	19.9531
AHI#6.11_135.0026m/z	310.052	278.021	294.037	789.3	710.272	749.786	392.04	321.839	356.939	2.54997	1.21393
RPP#12.38_561.9955m/z	15.1974	17.1455	16.1714	42.604	39.852	41.228	37.7904	16.5924	27.1914	2.54943	1.68145
ZHI#9.14_780.4006m/z	50.4453	53.8315	52.1384	153.525	111.642	132.583	145.631	133.927	139.779	2.54291	2.68092
ZHI#5.76_444.2443m/z	38.3297	98.2856	68.3077	213.276	133.682	173.479	159.117	132.435	145.776	2.53967	2.13411
RPP#9.06_910.5270m/z	15.95	6.13415	11.0421	18.7447	37.3354	28.04	10.1633	12.4858	11.3245	2.53939	1.02558
ZHI#1.04_299.2591m/z	1341.92	1207.52	1274.72	3222.94	3248.25	3235.6	2735.45	2717.39	2726.42	2.53828	2.13884
RPP#5.40_160.0089m/z	167.155	167.286	167.22	449.665	398.614	424.139	185.711	185.969	185.84	2.53641	1.11135
AHI#2.17_270.1508m/z	200.791	78.101	139.446	326.772	380.114	353.443	203.786	203.285	203.536	2.53462	1.4596
AHI#4.68_472.0743m/z	8.20941	29.1896	18.6995	48.1301	46.6504	47.3903	13.007	27.8109	20.4089	2.53431	1.09142
AHI#2.39_186.9977m/z	29.333	28.647	28.99	65.9391	80.9511	73.4451	30.0536	30.1106	30.0821	2.53346	1.03767
AHI#11.16_589.1171n	131.214	84.2971	107.755	280.375	265.434	272.904	63.2622	78.5519	70.9071	2.53263	0.658037
ZHI#7.14_326.1103m/z	2465.15	2689.48	2577.31	6504.31	6548.79	6526.55	12381.6	12867.9	12624.7	2.53231	4.8984
RPP#1.24_157.1332m/z	19.148	9.8961	14.5221	36.7322	36.7901	36.7611	17.2996	13.6692	15.4844	2.5314	1.06627
RPP#14.87_547.3809m/z	40.1278	41.8335	40.9806	63.3167	144.082	103.699	37.4961	117.342	77.4193	2.53045	1.88917
RPP#1.24_403.0902n	254.271	306.198	280.234	574.275	842.933	708.604	251.171	296.437	273.804	2.52861	0.977054
AHI#11.16_611.6058m/z	162.577	168.93	165.753	512.993	325.083	419.038	53.8489	89.8003	71.8246	2.52808	0.433322
AHI#5.97_452.0955m/z	59.5681	39.6675	49.6178	135.602	115.192	125.397	43.9526	40.6898	42.3212	2.52725	0.852944
ZHI#9.02_284.1371m/z	18.5055	20.6344	19.57	48.5784	50.336	49.4572	37.1871	43.0004	40.0938	2.5272	2.04874
ZHI#6.55_388.1004m/z	706.567	735.369	720.968	1795.25	1844.79	1820.02	642.857	720.89	681.874	2.52442	0.945775
RPP#13.46_233.2112m/z	6.73775	9.62018	8.17897	16.2697	25.0205	20.6451	22.0054	10.9363	16.4708	2.52417	2.0138
RPP#10.48_812.6106m/z	9.74997	2.93259	6.34128	19.6756	12.3298	16.0027	10.1735	17.652	13.9127	2.52358	2.19399
RPP#8.43_460.9171m/z	20.6989	5.24835	12.9736	27.9028	37.5594	32.7311	27.787	44.8856	36.3363	2.52289	2.80078
RPP#5.98_815.4540m/z	11.4633	18.4525	14.9579	38.3024	37.159	37.7307	14.8015	29.5915	22.1965	2.52246	1.48393
AHI#6.01_820.5983m/z	159.827	148.172	154	383.615	393.259	388.437	272.913	234.879	253.896	2.52233	1.64868
AHI#3.07_559.4091n	3036.17	2923.43	2979.8	7851.95	7171.28	7511.62	1764.7	1977.79	1871.25	2.52085	0.627977
AHI#7.13_769.5449m/z	64.9793	45.4453	55.2123	138.1	140.191	139.145	156.921	107.417	132.169	2.52019	2.39383
ZHI#1.58_374.0537m/z	205.475	188.934	197.205	470.134	523.427	496.781	40.1914	0.0213414	20.1064	2.51911	0.101957
AHI#2.38_294.0702m/z	1182.85	1175.39	1179.12	2914.38	3023.54	2968.96	652.177	562.367	607.272	2.51795	0.515021
AHI#2.45_346.0328m/z	60.7197	78.0834	69.4015	168.823	180.398	174.61	84.5661	59.6587	72.1124	2.51594	1.03906
AHI#1.98_228.0276m/z	51.3275	47.3483	49.3379	146.056	102.065	124.061	534.824	332.243	433.533	2.51451	8.78702
AHI#4.75_442.0102m/z	51.1035	67.5857	59.3446	119.814	178.542	149.178	105.37	100.305	102.837	2.51376	1.73289
AHI#3.36_598.1455n	3616.6	3518.01	3567.3	8944.83	8987.23	8966.03	6737.18	4589.71	5663.44	2.51339	1.5876
AHI#6.18_302.0021m/z	30.0448	34.852	32.4484	78.2948	84.7896	81.5422	48.7274	35.6989	42.2131	2.51298	1.30093
AHI#1.27_770.2193n	836.15	922.46	879.305	2537.12	1881.08	2209.1	1096.9	882.204	989.552	2.51233	1.12538
AHI#2.34_371.0015m/z	84.0909	84.3371	84.214	233.671	189.261	211.466	132.787	121.879	127.333	2.51106	1.51202
AHI#3.07_665.3842m/z	182.371	142.446	162.409	471.601	343.366	407.483	158.803	228.479	193.641	2.509	1.19231
RPP#5.40_133.5474m/z	65.9142	68.2259	67.07	169.651	166.723	168.187	45.1888	62.4821	53.8355	2.50763	0.802676
AHI#4.97_274.9203m/z	37.6581	33.9344	35.7963	86.5934	92.8978	89.7456	62.8567	58.1186	60.4876	2.50712	1.68978
RPP#1.49_116.0529m/z	11.3339	7.52544	9.42968	23.7514	23.5234	23.6374	58.4362	53.7621	56.0991	2.5067	5.94921
AHI#2.34_133.0492m/z	1482.64	1495.92	1489.28	3686.14	3780.11	3733.13	1547.97	1592.78	1570.37	2.50667	1.05445
AHI#1.98_841.0012m/z	386	350.924	368.462	976.191	870.313	923.252	317.726	337.449	327.587	2.50569	0.889066
AHI#1.82_522.6519m/z	200.497	186.126	193.312	521.356	446.997	484.176	89.2156	88.6468	88.9312	2.50464	0.460041
AHI#6.32_315.0668m/z	116.178	172.846	144.512	333.188	390.628	361.908	148.357	164.073	156.215	2.50434	1.08098
ZHI#9.53_272.1251m/z	5.48519	0	2.74259	6.12226	7.60327	6.86276	14.0902	6.64956	10.3699	2.50229	3.78104
AHI#10.30_408.0789m/z	46.0998	35.7519	40.9259	128.606	76.1155	102.361	46.4063	39.9855	43.1959	2.50113	1.05547
ZHI#10.71_841.3971m/z	53.4567	21.5011	37.4789	83.6215	103.81	93.7158	54.8456	115.839	85.3421	2.50049	2.27707
AHI#1.79_752.9485m/z	782.644	862.132	822.388	2059.47	2050.88	2055.18	435.184	386.894	411.039	2.49903	0.499812
ZHI#7.17_437.0981m/z	29.4906	31.2151	30.3529	72.979	78.6505	75.8147	83.3568	57.5586	70.4577	2.49778	2.32129
AHI#1.84_776.9385m/z	128.714	170.275	149.494	396.522	350.095	373.308	119.508	137.274	128.391	2.49714	0.858832
AHI#11.16_601.1152m/z	72.7029	39.2774	55.9901	134.701	144.363	139.532	26.2392	40.1272	33.1832	2.49208	0.592662
ZHI#5.83_149.0451m/z	2926.16	3238.45	3082.3	7721.34	7633.19	7677.26	2854.82	2936.75	2895.78	2.49076	0.939487
RPP#9.30_310.4529m/z	8.59424	6.49147	7.54286	21.5159	16.0351	18.7755	14.9694	10.1209	12.5451	2.48918	1.66318
AHI#1.25_848.3199n	886.364	983.786	935.075	2436.5	2213.9	2325.2	1099.34	981.454	1040.4	2.48665	1.11264
ZHI#1.37_702.5078m/z	8.84857	3.39104	6.1198	16.2489	14.167	15.208	4076.1	4096.26	4086.18	2.48505	667.698
RPP#14.07_1054.5306m/z	12.5095	13.0002	12.7548	41.0689	22.2847	31.6768	37.6287	29.4594	33.5441	2.48351	2.62991
AHI#1.27_584.0317m/z	20.1127	32.9513	26.532	60.6186	70.9185	65.7686	28.9733	50.8186	39.8959	2.47884	1.50369
RPP#1.09_156.5068m/z	14.6026	0	7.30131	20.4423	15.7325	18.0874	22.322	20.0667	21.1944	2.47728	2.90281
AHI#11.23_724.0817m/z	24.3572	32.0845	28.2209	74.5185	65.2821	69.9003	33.5509	47.687	40.6189	2.4769	1.43932
AHI#4.63_495.2020m/z	191.126	251.484	221.305	357.657	738.357	548.007	281.12	334.779	307.949	2.47625	1.39152
RPP#1.33_151.0059m/z	6694.01	6802.85	6748.43	16453.6	16963.4	16708.5	7996.91	8094.05	8045.48	2.4759	1.1922
AHI#13.10_332.9498m/z	21.7987	17.3492	19.574	36.7535	60.1483	48.4509	33.2872	29.0332	31.1602	2.47528	1.59192
AHI#1.95_551.6687m/z	456.573	362.545	409.559	1052.81	973.889	1013.35	199.665	196.182	197.924	2.47424	0.483261
AHI#5.82_286.0277m/z	34.7263	43.5343	39.1303	97.654	95.9402	96.7971	35.543	35.6497	35.5963	2.47371	0.909688
AHI#2.24_712.1372m/z	177.777	401.756	289.766	623.094	810.148	716.621	190.11	136.688	163.399	2.4731	0.563899
AHI#1.39_625.9085n	101.478	62.9581	82.218	183.114	223.444	203.279	19.6269	79.1947	49.4108	2.47244	0.600973
RPP#11.60_187.0574m/z	0.0292613	5.17247	2.60087	3.93954	8.91798	6.42876	6.72376	6.80394	6.76385	2.47178	2.60061
AHI#1.18_517.0911m/z	101.377	200.349	150.863	341.923	403.805	372.864	450.688	457.555	454.121	2.47154	3.01016
ZHI#2.83_131.9877n	127.778	130.819	129.299	351.73	287.027	319.378	457.053	437.407	447.23	2.47008	3.45889
AHI#7.36_988.7923m/z	16.796	46.4686	31.6323	65.6366	90.5437	78.0901	18.4714	16.6405	17.556	2.46868	0.555
AHI#12.72_754.0299m/z	5.92908	24.4407	15.1849	44.3254	30.5589	37.4422	52.1234	64.1353	58.1294	2.46575	3.8281
AHI#7.24_432.0339m/z	27.5067	32.0142	29.7605	76.8684	69.7968	73.3326	41.06	46.2199	43.6399	2.46409	1.46637
RPP#6.85_244.2017m/z	10.8954	6.1078	8.5016	23.6917	18.2001	20.9459	23.5969	15.3556	19.4763	2.46376	2.29089
RPP#8.50_312.2497m/z	12.8843	1.0314	6.95786	13.6974	20.5708	17.1341	16.9348	15.8892	16.412	2.46255	2.35877
RPP#3.85_639.0939m/z	6.28937	15.8471	11.0682	21.6057	32.9047	27.2552	33.941	12.5315	23.2363	2.46248	2.09937
ZHI#5.58_250.9830n	97.169	78.8032	87.9861	243.239	189.37	216.304	58.7957	83.2861	71.0409	2.45839	0.80741
AHI#5.40_259.0166m/z	21.6058	15.6727	18.6393	47.098	44.4865	45.7922	38.7126	23.4576	31.0851	2.45676	1.66772
ZHI#4.88_268.0483m/z	174.769	92.3922	133.58	373	282.815	327.907	188.344	296.304	242.324	2.45475	1.81407
AHI#7.31_446.2577m/z	16.4443	23.019	19.7317	41.5897	55.2178	48.4038	109.67	75.6436	92.6568	2.4531	4.69585
AHI#2.15_240.8841m/z	20.2967	8.95741	14.627	38.4658	33.2913	35.8785	38.5709	27.3331	32.952	2.45289	2.25282
AHI#3.50_988.9275m/z	71.1332	58.8849	65.0091	158.059	160.693	159.376	241.004	213.749	227.377	2.4516	3.49762
AHI#1.34_890.3555n	136.152	184.356	160.254	478.341	307.339	392.84	135.719	155.544	145.631	2.45136	0.908753
AHI#2.71_538.4309m/z	23.4384	0.159993	11.7992	34.8289	23.011	28.9199	57.5085	16.0051	36.7568	2.45101	3.1152
RPP#4.20_180.9007m/z	7.32048	2.20785	4.76417	12.3053	11.0274	11.6663	7.21525	3.24959	5.23242	2.44877	1.09829
RPP#12.28_459.7469m/z	18.4628	10.0041	14.2335	41.9038	27.7396	34.8217	38.9454	21.4451	30.1953	2.44647	2.12143
AHI#15.83_281.0908m/z	8.63004	22.047	15.3385	43.2403	31.7697	37.505	24.0839	18.5685	21.3262	2.44515	1.39037
AHI#1.55_602.7141m/z	516.795	364.002	440.399	1046	1106.24	1076.12	449.025	501.9	475.462	2.44351	1.07962
RPP#1.33_113.0092m/z	2210.32	2250	2230.16	5398.24	5486.66	5442.45	2580.98	2589.19	2585.08	2.44038	1.15915
AHI#6.58_309.9876m/z	2.08435	14.7949	8.43964	23.0093	18.1575	20.5834	37.7383	40.9537	39.346	2.4389	4.66205
RPP#13.41_890.5172m/z	24.8246	15.565	20.1948	46.7535	51.7075	49.2305	52.6359	17.21	34.9229	2.43778	1.7293
AHI#1.82_528.1070m/z	261.081	163.104	212.093	639.224	394.691	516.957	201.133	336.995	269.064	2.43741	1.26862
RPP#13.25_552.4130m/z	152.363	24.7512	88.557	346.02	85.5948	215.807	168.225	61.7489	114.987	2.43693	1.29845
AHI#3.23_390.0852m/z	28.578	65.5985	47.0883	120.253	109.212	114.732	45.6397	50.7797	48.2097	2.43654	1.02382
AHI#7.76_388.0029m/z	25.6028	19.1	22.3514	67.4219	41.3643	54.3931	29.825	18.6063	24.2156	2.43354	1.08341
AHI#3.50_577.6329m/z	51.5058	18.2139	34.8598	111.056	58.5959	84.8258	124.855	138.047	131.451	2.43334	3.77084
AHI#3.07_676.5371m/z	844.517	904.57	874.543	2256.03	1997.66	2126.84	869.672	962.804	916.238	2.43195	1.04768
AHI#5.89_290.0647m/z	554.873	447.925	501.399	1256.4	1182.13	1219.26	505.143	554.561	529.852	2.43172	1.05675
AHI#2.90_598.6288m/z	49.7879	41.8195	45.8037	140.833	81.7273	111.28	2.14881	33.7933	17.971	2.4295	0.392349
AHI#2.46_710.4173m/z	1111.85	1197.4	1154.62	2655.93	2953.75	2804.84	1114.81	1274.52	1194.66	2.42922	1.03468
RPP#13.29_471.9359m/z	5.1714	16.0884	10.6299	26.5723	25.0489	25.8106	24.1287	24.8494	24.4891	2.42811	2.30379
RPP#11.98_126.2353m/z	4.39611	2.20715	3.30163	3.81966	12.202	8.01083	3.24025	2.4013	2.82078	2.42633	0.854358
RPP#5.40_161.0283m/z	12.4565	8.60405	10.5303	13.041	38.054	25.5475	15.9275	18.2866	17.1071	2.4261	1.62456
AHI#11.16_695.1162n	360.52	395.483	378.002	1015.92	817.923	916.919	171.855	218.455	195.155	2.4257	0.516281
AHI#1.22_370.0844m/z	381.498	419.676	400.587	925.232	1017.96	971.597	645.062	578.844	611.953	2.42543	1.52764
RPP#13.70_228.1978m/z	5.07468	2.69807	3.88637	11.3961	7.45601	9.42607	3.20413	4.89237	4.04825	2.42541	1.04165
AHI#4.14_575.9913m/z	26.5465	36.9979	31.7722	49.4388	104.551	76.995	92.7501	90.8513	91.8007	2.42335	2.88934
RPP#12.10_550.7332m/z	30.892	33.6215	32.2567	93.2424	63.0444	78.1434	69.5754	50.6354	60.1054	2.42255	1.86335
AHI#1.18_706.3858m/z	1323.45	1100.57	1212.01	2616.1	3246.07	2931.09	1252.76	1365.32	1309.04	2.41837	1.08006
AHI#3.55_176.9894m/z	14.0622	12.9123	13.4872	32.095	33.0818	32.5884	23.8834	20.7602	22.3218	2.41624	1.65504
RPP#6.50_775.9365m/z	3.50672	14.4801	8.99339	21.107	22.3359	21.7215	19.345	19.7434	19.5442	2.41527	2.17317
ZHI#10.50_145.0978m/z	236.307	234.404	235.356	566.662	569.796	568.229	325.862	276.235	301.048	2.41434	1.27912
AHI#3.76_420.9528m/z	36.6579	48.6738	42.6658	122.5	83.4597	102.98	87.1548	35.9958	61.5753	2.41363	1.4432
RPP#1.33_187.0154n	3816.51	3855.59	3836.05	9164.92	9347.82	9256.37	4458.09	4596.02	4527.05	2.413	1.18013
AHI#5.01_218.9360m/z	45.8144	58.267	52.0407	125.62	125.408	125.514	142.457	129.958	136.208	2.41184	2.61733
AHI#1.01_523.8117m/z	148.996	220.753	184.875	378.717	513.042	445.88	174.665	204.846	189.756	2.41179	1.0264
AHI#3.21_593.4405m/z	163.783	110.49	137.137	354.231	306.839	330.535	254.059	120.384	187.222	2.41026	1.36522
AHI#3.61_573.4452m/z	61.1794	37.586	49.3827	196.635	41.221	118.928	99.0321	172.245	135.638	2.40829	2.74668
AHI#4.02_146.0810m/z	17189.8	17367.2	17278.5	42255.8	40917.1	41586.5	6106.84	6505.92	6306.38	2.40683	0.364984
AHI#3.07_731.5917n	7710.9	7649.05	7679.97	18660.8	18304.4	18482.6	7337.78	7398.45	7368.11	2.4066	0.959393
RPP#6.57_801.9285m/z	18.3309	25.9449	22.1379	57.5053	48.9056	53.2054	25.0575	23.2817	24.1696	2.40337	1.09178
AHI#3.07_611.4396n	1926.38	1803.83	1865.1	4653.88	4296.72	4475.3	1695.81	1637.83	1666.82	2.39949	0.893688
AHI#1.58_146.0810m/z	1310.89	1366.29	1338.59	3258.4	3164.79	3211.59	829.096	780.754	804.925	2.39923	0.601322
RPP#11.77_386.7578m/z	331.246	78.8017	205.024	598.27	385.394	491.832	445.206	240.172	342.689	2.3989	1.67146
AHI#2.60_445.3305m/z	0.587675	14.5887	7.5882	23.764	12.6408	18.2024	28.1887	15.9084	22.0486	2.39878	2.90564
AHI#1.22_395.0039m/z	169.498	239.999	204.748	488.55	493.467	491.009	246.449	287.359	266.904	2.39811	1.30357
AHI#3.57_210.0377m/z	278.183	301.217	289.7	693.823	695.411	694.617	349.559	310.744	330.151	2.39771	1.13963
RPP#1.26_165.0059m/z	4303.09	4401.86	4352.48	10366.9	10498.1	10432.5	5433.42	5676.42	5554.92	2.39692	1.27627
AHI#3.45_936.7575m/z	272.6	335.031	303.815	722.3	734.095	728.198	390.597	306.147	348.372	2.39684	1.14666
AHI#3.50_504.3887m/z	159.247	114.597	136.922	339.157	317.005	328.081	322.806	287.568	305.187	2.39612	2.22891
RPP#1.26_211.0453m/z	568.262	652.218	610.24	1371.11	1553.05	1462.08	630.816	585.208	608.012	2.3959	0.996349
AHI#9.41_186.0954m/z	14.8511	5.01732	9.93423	27.9584	19.5903	23.7744	20.9867	15.3752	18.181	2.39318	1.83013
RPP#13.20_386.7574m/z	383.484	128.607	256.045	749.893	474.787	612.34	508.207	263.648	385.928	2.39153	1.50726
RPP#14.97_231.0066m/z	5.66707	3.74074	4.70391	13.8953	8.60057	11.2479	5.58745	12.0156	8.80155	2.39119	1.87111
AHI#5.18_767.4493m/z	13.2725	24.0485	18.6605	77.627	11.5945	44.6108	47.1338	19.4501	33.2919	2.39065	1.78408
ZHI#2.04_136.0036m/z	280.657	282.373	281.515	670.702	674.343	672.522	116.273	134.361	125.317	2.38894	0.445151
RPP#1.85_246.5246m/z	28.3162	33.1644	30.7403	70.7644	75.9729	73.3686	36.7903	38.5324	37.6614	2.38672	1.22515
AHI#4.63_536.0031m/z	44.2041	21.9412	33.0727	69.4456	88.3982	78.9219	94.3853	77.5602	85.9728	2.38632	2.59951
ZHI#8.32_127.0507m/z	130.763	146.034	138.398	335.714	324.685	330.199	114.922	136.257	125.589	2.38587	0.907448
ZHI#3.11_437.3246m/z	411.106	381.135	396.12	905.441	984.602	945.022	152.324	188.774	170.549	2.38569	0.430548
RPP#3.77_603.0293m/z	23.2579	5.80152	14.5297	34.835	34.4804	34.6577	16.2911	22.109	19.2	2.3853	1.32143
RPP#6.90_259.2535m/z	6.66023	5.74606	6.20314	11.5919	17.9947	14.7933	15.7254	6.66523	11.1953	2.38481	1.80478
RPP#12.83_124.0559m/z	1.25252	3.86805	2.56028	6.16883	6.03113	6.09998	15.3957	6.33339	10.8645	2.38254	4.24349
AHI#2.36_375.0530n	344.606	298.652	321.629	703.927	828.504	766.215	908.551	843.821	876.186	2.3823	2.72422
RPP#14.40_1088.4187m/z	25.1332	4.48454	14.8089	47.8069	22.7115	35.2592	25.6919	15.9106	20.8012	2.38095	1.40465
ZHI#7.60_461.1318m/z	159.872	94.7502	127.311	314.11	291.991	303.05	210.739	204.577	207.658	2.38039	1.63111
AHI#8.26_609.3031m/z	46.2745	16.9957	31.6351	70.3778	80.2004	75.2891	58.7106	33.1692	45.9399	2.37992	1.45218
RPP#4.46_1163.0619m/z	5.79144	17.1914	11.4914	18.649	36.0138	27.3314	19.6496	19.0772	19.3634	2.37842	1.68503
ZHI#5.78_262.0377m/z	23.6888	60.821	42.2549	97.6365	103.337	100.487	39.2184	29.3585	34.2884	2.37811	0.811467
AHI#11.16_526.0796n	254.108	207.976	231.042	583.169	515.218	549.193	144.697	179.999	162.348	2.37703	0.702678
AHI#6.16_291.1725m/z	139.364	210.726	175.045	433.373	397.585	415.479	127.441	127.166	127.304	2.37356	0.727262
AHI#5.96_703.4184m/z	20.8827	27.5275	24.2051	60.2161	54.6368	57.4264	24.1889	62.5669	43.3779	2.37249	1.7921
AHI#1.15_364.7267m/z	43.139	21.8583	32.4986	82.0029	72.1167	77.0598	40.7488	40.7443	40.7465	2.37117	1.25379
ZHI#6.89_278.0755m/z	85.5132	99.7879	92.6506	192.621	246.575	219.598	25.3547	35.6952	30.5249	2.37017	0.329463
RPP#9.67_531.9862m/z	2.60018	5.86597	4.23307	1.51935	18.5383	10.0288	9.63871	0.0966094	4.86766	2.36915	1.14991
RPP#3.19_880.4164m/z	6.7036	4.57751	5.64056	17.1011	9.62011	13.3606	11.5074	19.5848	15.5461	2.36866	2.75613
RPP#1.26_246.0007n	7345.48	6921.78	7133.63	16946.7	16840.4	16893.6	7643.2	7795.69	7719.45	2.36816	1.08212
RPP#13.50_862.6951m/z	58.9549	13.559	36.257	84.421	87.2241	85.8225	42.0839	75.3104	58.6971	2.36706	1.61892
AHI#2.41_511.5275m/z	50.1577	37.9605	44.0591	93.0464	114.695	103.871	76.2514	16.5967	46.4241	2.35754	1.05368
AHI#1.29_825.2279n	169.307	186.11	177.709	425.606	411.922	418.764	165.705	127.08	146.393	2.35646	0.823778
AHI#3.00_261.1442m/z	6666.78	6497.47	6582.13	14973.4	16037.8	15505.6	5750.48	5802.15	5776.31	2.35571	0.877575
RPP#4.65_199.6016m/z	7.58989	3.42011	5.505	11.2831	14.6446	12.9638	16.9715	14.0363	15.5039	2.35492	2.81633
RPP#1.02_106.5149m/z	12.5514	13.8552	13.2033	28.0898	34.087	31.0884	14.6655	20.3566	17.5111	2.3546	1.32627
ZHI#5.12_246.1346m/z	84.6643	134.861	109.763	273.369	243.481	258.425	71.5067	17.6586	44.5827	2.3544	0.406173
AHI#3.09_798.5081m/z	15897.3	15702.4	15799.9	37991.4	36374.8	37183.1	16518.7	16740.3	16629.5	2.35338	1.05251
AHI#1.15_724.0963n	194.794	613.795	404.294	735	1167.75	951.374	251.2	371.293	311.247	2.35317	0.769852
RPP#13.36_386.7570m/z	184.78	64.5534	124.667	355.221	231.274	293.247	251.845	123.256	187.551	2.35225	1.50441
ZHI#5.68_159.9802n	104.935	100.208	102.571	256.798	225.646	241.222	421.189	433.405	427.297	2.35175	4.16586
AHI#2.45_760.6487m/z	88.9797	35.97	62.4749	178.075	115.462	146.769	117.448	119.134	118.291	2.34924	1.89342
RPP#10.50_473.2393m/z	23.23	15.2589	19.2445	53.1572	37.2611	45.2092	28.7599	7.47344	18.1167	2.3492	0.941396
AHI#1.70_556.1079m/z	70.0988	71.9362	71.0175	167.401	166.119	166.76	271.742	301.99	286.866	2.34815	4.03937
AHI#1.05_624.7057m/z	41.1166	150.303	95.71	245.155	204.077	224.616	169.279	128.457	148.868	2.34684	1.5554
AHI#4.31_165.1399n	4939.3	4951.88	4945.59	11513	11693.3	11603.1	11031.7	11178.9	11105.3	2.34616	2.2455
AHI#2.95_382.9266m/z	32.7483	34.7193	33.7338	77.7088	80.5343	79.1216	149.542	130.686	140.114	2.34547	4.15353
AHI#3.47_138.1027n	1438.93	1436.15	1437.54	3336.28	3399.95	3368.12	3886.13	3678.25	3782.19	2.34297	2.63102
AHI#9.95_461.2854m/z	78.631	71.063	74.847	168.818	181.673	175.246	125	147.425	136.212	2.34138	1.81987
RPP#1.51_446.2426m/z	110.701	130.76	120.73	247.904	317.156	282.53	117.926	137.288	127.607	2.34017	1.05696
RPP#1.05_169.9821m/z	54.3667	32.3293	43.348	111.01	91.709	101.36	48.655	43.6618	46.1584	2.33828	1.06483
AHI#9.36_657.8364m/z	240	295.386	267.693	619.809	630.564	625.187	186.101	261.694	223.898	2.33546	0.836398
AHI#7.15_757.5412m/z	49.672	47.3133	48.4926	133.407	93.0017	113.204	78.275	54.9457	66.6103	2.33446	1.37362
AHI#1.96_474.0584m/z	34.1203	22.7982	28.4592	79.1014	53.6987	66.4	186.061	185.02	185.54	2.33316	6.51952
AHI#3.47_196.0245m/z	111.359	113.907	112.633	276.401	248.871	262.636	205.437	154.001	179.719	2.33178	1.59562
ZHI#6.55_592.1422n	354.092	332.872	343.482	796.031	805.703	800.867	477.597	505.418	491.508	2.33161	1.43096
AHI#6.16_127.9872n	78.879	77.3014	78.0902	193.893	169.92	181.907	106.296	97.9966	102.147	2.32944	1.30806
RPP#1.33_128.5215m/z	2092.04	2110.46	2101.25	4834.16	4952.69	4893.43	2347.53	2388.29	2367.91	2.32882	1.1269
AHI#5.21_414.9273m/z	4.26548	14.7156	9.49052	17.3101	26.8864	22.0982	15.5491	34.5097	25.0294	2.32845	2.63731
AHI#2.00_345.0145m/z	21.3135	22.0459	21.6797	58.7551	42.1238	50.4394	45.6835	32.1844	38.9339	2.32657	1.79587
AHI#3.19_208.0598m/z	544.408	389.374	466.891	1150.93	1021.35	1086.14	350.703	368.803	359.753	2.32632	0.770529
AHI#12.37_150.9762m/z	10.5308	9.15159	9.84118	17.6235	28.1464	22.8849	16.5685	9.1068	12.8376	2.32543	1.30448
AHI#4.49_268.0798m/z	644.974	585.005	614.99	1419.78	1439.11	1429.45	884.534	928.43	906.482	2.32434	1.47398
AHI#4.83_503.1508m/z	88.3841	14.3617	51.3729	134.893	103.633	119.263	55.3926	35.131	45.2618	2.32152	0.881045
RPP#11.22_437.1172m/z	18.2085	7.60683	12.9077	33.9115	25.9954	29.9534	22.4763	31.3089	26.8926	2.32059	2.08346
AHI#2.50_362.2077m/z	1238.86	1264.27	1251.57	2779.27	3021.45	2900.36	1218.82	1258.08	1238.45	2.31738	0.989518
AHI#4.47_417.0078m/z	21.841	31.7295	26.7852	76.8977	47.2445	62.0711	13.6503	13.0672	13.3587	2.31736	0.498735
RPP#3.98_316.2231m/z	57.0293	38.9537	47.9915	110.785	111.211	110.998	22.8274	11.5048	17.1661	2.31286	0.35769
AHI#3.02_458.2669m/z	788.504	768.79	778.647	1736.56	1864	1800.28	1121.26	1153.48	1137.37	2.31206	1.4607
AHI#2.38_536.3971m/z	75.774	30.4483	53.1112	81.6309	163.922	122.777	103.505	62.0018	82.7532	2.31169	1.55811
AHI#3.05_430.1822m/z	2022.18	2354.77	2188.47	5012.29	5105.75	5059.02	1949.9	2464.53	2207.21	2.31167	1.00856
AHI#1.03_324.8993m/z	2.89514	0.0616309	1.47839	2.29668	4.53629	3.41649	86.0744	79.6734	82.8739	2.31095	56.057
ZHI#10.53_247.1298m/z	90.5413	92.446	91.4937	223.143	199.699	211.421	98.6456	101.52	100.083	2.31077	1.09388
ZHI#6.55_576.1672n	393.609	392.781	393.195	936.4	880.433	908.416	482.046	468.077	475.061	2.31034	1.20821
RPP#1.24_134.0230m/z	2294.09	2553.25	2423.67	5200.37	5993.5	5596.93	2502.62	2457.44	2480.03	2.30928	1.02325
AHI#2.03_149.0706m/z	10062.7	10378.9	10220.8	23046.7	24124.2	23585.5	5556.45	5920.26	5738.35	2.30759	0.561439
AHI#2.22_654.7314m/z	82.9276	85.445	84.1863	213.183	175.146	194.165	42.0216	50.9695	46.4956	2.30637	0.552294
AHI#9.41_149.0725n	443.157	416.028	429.593	1061.82	919.503	990.66	753.726	722.638	738.182	2.30605	1.71833
AHI#15.66_482.8509m/z	46.0025	15.0893	30.5459	93.8373	47.007	70.4222	66.9011	72.5594	69.7303	2.30546	2.2828
AHI#2.84_310.9980m/z	8.61467	1.23756	4.92611	4.49438	18.218	11.3562	0	2.72039	1.36019	2.30531	0.276119
AHI#11.07_459.6338m/z	29.5261	39.9229	34.7245	90.1489	69.9082	80.0285	74.8179	58.7641	66.791	2.30467	1.92346
RPP#14.21_353.6186m/z	10.3622	44.6874	27.5248	45.7927	81.0025	63.3976	36.0464	56.0104	46.0284	2.30329	1.67225
AHI#1.91_358.0354m/z	309.407	318.95	314.179	764.781	682.04	723.41	483.053	449.84	466.447	2.30254	1.48465
AHI#2.46_772.4676m/z	38.1092	44.0354	41.0723	82.7858	106.258	94.5221	96.6344	44.3421	70.4883	2.30136	1.7162
AHI#3.88_611.6905m/z	41.0236	17.247	29.1353	78.8272	55.2484	67.0378	47.1431	70.3164	58.7297	2.30091	2.01576
AHI#5.40_191.1790m/z	7.87265	15.0028	11.4378	26.8945	25.7102	26.3023	20.1463	15.1803	17.6633	2.29961	1.5443
RPP#12.69_261.2428m/z	4.12462	6.37479	5.24971	10.1127	14.0179	12.0653	9.76401	11.6077	10.6859	2.29828	2.03551
RPP#4.24_465.1195m/z	30.1491	29.4752	29.8122	51.3863	85.5989	68.4926	43.9872	93.0673	68.5273	2.29747	2.29863
RPP#4.48_170.6247m/z	5.60827	4.16432	4.8863	11.2003	11.2509	11.2256	4.53526	9.84431	7.18978	2.29737	1.47142
RPP#12.47_386.7573m/z	454.355	157.869	306.112	845.65	559.859	702.755	705.19	310.531	507.86	2.29574	1.65907
RPP#14.99_665.5119m/z	61.2915	34.0271	47.6593	108.105	110.537	109.321	216.037	68.5669	142.302	2.2938	2.98581
ZHI#5.94_705.3936m/z	213.119	189.016	201.067	493.723	428.435	461.079	282.23	296.278	289.254	2.29316	1.43859
RPP#13.23_350.1855m/z	2.78995	4.14356	3.46676	15.8966	0	7.94831	7.67663	6.62488	7.15076	2.29272	2.06267
AHI#3.24_807.2597m/z	1205.95	1310.59	1258.27	2444.49	3322.54	2883.52	1529.29	1305.36	1417.33	2.29166	1.12641
AHI#3.78_263.8333m/z	8.52658	8.73742	8.632	17.6756	21.8647	19.7702	10.7043	25.3653	18.0348	2.29033	2.08929
AHI#7.36_212.1029m/z	61434.1	65909.3	63671.7	142677	148971	145824	29027.5	31925.6	30476.6	2.29024	0.478652
RPP#4.22_1215.0829m/z	14.35	8.17173	11.2609	20.9723	30.5873	25.7798	5.5554	15.8782	10.7168	2.28932	0.951686
RPP#6.20_643.3960m/z	33.1623	37.1719	35.1671	67.6812	93.3104	80.4958	63.6294	43.2545	53.442	2.28895	1.51966
AHI#12.63_250.1286m/z	369.617	342.718	356.168	844.711	785.23	814.97	303.503	343.547	323.525	2.28816	0.90835
RPP#1.07_689.9506m/z	13.0046	25.5976	19.3011	37.7953	50.4121	44.1037	32.4958	27.3869	29.9414	2.28504	1.55128
AHI#11.14_464.5520m/z	47.9188	14.6096	31.2642	80.6396	62.1692	71.4044	41.5269	11.014	26.2705	2.2839	0.840274
AHI#1.63_299.9936m/z	70.8659	22.7888	46.8273	76.8229	136.957	106.89	34.4725	85.1393	59.8059	2.28264	1.27716
AHI#5.84_312.0059m/z	4.67335	8.20043	6.43689	17.1051	12.2747	14.6899	56.5591	41.8264	49.1928	2.28214	7.64232
RPP#1.02_427.2270m/z	52.5793	42.1005	47.3399	114.599	101.432	108.015	583.612	593.081	588.347	2.28169	12.4281
AHI#3.07_760.6319m/z	7811.8	7784.87	7798.34	18207.4	17372.9	17790.2	5958.56	6759.66	6359.11	2.28128	0.815444
RPP#1.37_170.5170m/z	1204.61	1168.54	1186.58	2638.45	2773.97	2706.21	892.65	975.363	934.006	2.28069	0.787143
RPP#6.50_689.8651m/z	22.3118	30.742	26.5269	52.1484	68.6704	60.4094	61.5642	53.2389	57.4015	2.27729	2.1639
RPP#3.63_373.8175m/z	202.007	212.647	207.327	461.286	482.984	472.135	222.255	220.135	221.195	2.27725	1.06689
AHI#6.67_252.0278m/z	84.6297	62.5199	73.5748	152.409	182.608	167.508	435.482	429.259	432.37	2.2767	5.87661
ZHI#4.27_475.3284m/z	101.531	108.424	104.977	282.237	195.493	238.865	291.419	339.94	315.679	2.2754	3.00712
ZHI#5.45_220.9650m/z	21.5035	10.1496	15.8266	33.7907	38.2016	35.9961	70.6072	56.876	63.7416	2.27441	4.02751
RPP#6.62_285.5006m/z	1.5994	6.49848	4.04894	13.3947	5.0215	9.20812	4.55716	1.90243	3.22979	2.2742	0.797688
RPP#1.04_173.0417m/z	2078.96	2234.01	2156.48	3967.21	5839.59	4903.4	1806.57	1925.31	1865.94	2.2738	0.865269
RPP#5.53_744.4767m/z	8.65403	25.1539	16.904	26.4607	50.3726	38.4166	13.3934	4.72978	9.06158	2.27264	0.536062
RPP#7.84_133.9278m/z	4.60593	3.40851	4.00722	6.27841	11.9354	9.10691	12.3841	11.2884	11.8362	2.27263	2.95372
AHI#3.24_332.0774n	1089.92	941.94	1015.93	2389.7	2227.67	2308.69	1140.32	1053.49	1096.9	2.27249	1.07971
ZHI#1.55_188.0136n	143.386	162.352	152.869	337.563	356.95	347.257	116.529	127.476	122.003	2.27159	0.798085
AHI#3.85_304.0485m/z	55.4387	80.7672	68.1029	175.439	132.997	154.218	67.1097	38.3144	52.712	2.26448	0.774005
AHI#6.30_516.4937m/z	16.4637	13.6313	15.0475	50.7106	17.4063	34.0584	35.4108	36.342	35.8764	2.26339	2.38421
ZHI#6.40_408.0979m/z	1053.78	851.854	952.818	2376.05	1937	2156.53	729.452	581.916	655.684	2.26332	0.688152
ZHI#5.55_190.0720m/z	1194.77	1246.44	1220.61	2846.31	2676.61	2761.46	480.806	540.374	510.59	2.26237	0.418309
RPP#2.53_500.3291m/z	16.5015	11.2149	13.8582	18.9117	43.7756	31.3437	19.815	47.954	33.8845	2.26174	2.44508
AHI#4.64_127.1114m/z	2.2205	9.48261	5.85155	17.6675	8.79835	13.2329	13.3874	8.62419	11.0058	2.26144	1.88084
AHI#4.18_322.0589m/z	0.187484	25.7364	12.962	24.1838	34.4119	29.2978	113.357	84.3674	98.862	2.26029	7.62709
RPP#7.61_340.1375m/z	18.4827	5.97152	12.2271	32.3624	22.9002	27.6313	12.4526	13.6035	13.028	2.25984	1.06551
AHI#3.92_666.1476m/z	68.3233	73.0405	70.6819	174.629	144.811	159.72	93.9906	48.825	71.4078	2.2597	1.01027
AHI#5.51_304.9700m/z	96.9395	78.039	87.4893	202.822	192.284	197.553	133.496	91.478	112.487	2.25802	1.28572
AHI#3.80_256.0215m/z	67.6504	69.0218	68.3361	146.696	161.806	154.251	27.9683	48.3726	38.1705	2.25724	0.55857
RPP#7.54_400.0758m/z	6.95866	13.7466	10.3526	19.0614	27.6414	23.3514	36.3174	16.8238	26.5706	2.2556	2.56655
RPP#1.04_505.3082m/z	40.4007	55.0707	47.7357	101.448	113.856	107.652	29.5681	18.5447	24.0564	2.25516	0.50395
RPP#1.04_133.5309m/z	187.867	219.127	203.497	363.196	554.567	458.881	179.556	169.661	174.609	2.25498	0.858041
AHI#5.61_219.9798m/z	18.9736	23.3692	21.1714	45.5373	49.8848	47.711	23.0707	23.7918	23.4312	2.25356	1.10674
AHI#2.24_560.0761n	709.325	911.861	810.593	1705.22	1947	1826.11	921.647	810.539	866.093	2.25281	1.06847
AHI#10.63_612.8051m/z	31.6545	14.5589	23.1067	32.3356	71.7085	52.022	51.5148	64.8389	58.1769	2.25138	2.51774
RPP#2.22_275.8147m/z	22.2806	21.2607	21.7707	45.4207	52.5649	48.9928	41.5636	41.5543	41.559	2.25041	1.90894
AHI#3.17_647.5088m/z	142.598	160.44	151.519	322.225	359.469	340.847	323.3	226.643	274.972	2.24954	1.81477
RPP#7.58_376.0671m/z	6.81888	15.8092	11.314	22.6682	28.2297	25.4489	15.3262	24.7155	20.0209	2.24933	1.76956
RPP#14.70_1002.4313m/z	12.7596	11.1217	11.9407	45.1413	8.55841	26.8499	9.63084	5.87316	7.752	2.24861	0.649211
AHI#3.07_568.3883m/z	614.958	532.966	573.962	1384.36	1196.12	1290.24	390.757	340.854	365.805	2.24795	0.637334
RPP#6.45_936.5659m/z	14.1781	7.3433	10.7607	19.754	28.6164	24.1852	32.0628	20.3633	26.2131	2.24755	2.436
RPP#1.63_112.9907m/z	77.7801	71.5492	74.6646	164.68	170.665	167.672	117.719	126.5	122.109	2.24567	1.63544
RPP#13.93_549.8935n	8861.34	1923.5	5392.42	16546.1	7668.31	12107.2	9420.51	3479.31	6449.91	2.24523	1.19611
RPP#3.89_346.2330m/z	84.4502	75.1435	79.7968	160.702	197.611	179.157	54.1651	63.322	58.7436	2.24516	0.736164
ZHI#8.43_996.4714m/z	84.1647	32.9951	58.5799	124.558	138.114	131.336	123.573	132.533	128.053	2.242	2.18595
RPP#11.65_455.1214m/z	10.1135	4.38439	7.24892	4.52852	27.9636	16.2461	13.2627	22.0193	17.641	2.24117	2.4336
RPP#14.99_768.5505m/z	1846.8	823.986	1335.39	4211.14	1772.1	2991.62	2099.73	1017.07	1558.4	2.24025	1.167
AHI#1.91_552.0043m/z	136.516	143.675	140.095	351.29	276.212	313.751	72.1608	112.849	92.5048	2.23955	0.660299
AHI#2.19_639.7218m/z	92.2179	119.606	105.912	227.03	247.329	237.18	12.9186	46.4846	29.7016	2.2394	0.280437
AHI#7.93_346.2979m/z	2.65231	22.5835	12.6179	30.4556	26.0545	28.255	15.5991	2.25147	8.92529	2.23928	0.70735
AHI#3.16_319.0729n	1781.44	1716.89	1749.17	3886.95	3944.16	3915.55	2522.85	2632.92	2577.89	2.23852	1.47378
AHI#5.02_247.8842m/z	27.751	15.449	21.6	56.9812	39.6906	48.3359	32.0009	33.7664	32.8837	2.23777	1.52239
RPP#3.63_204.0861m/z	79.4826	79.3356	79.4091	165.966	189.156	177.561	82.8683	73.1464	78.0074	2.23602	0.982348
AHI#1.03_971.5299m/z	11.131	86.7012	48.9161	81.8103	136.838	109.324	59.4372	98.5676	79.0024	2.23493	1.61506
AHI#8.17_373.9984m/z	17.8499	10.2441	14.047	33.684	29.0876	31.3858	40.6466	30.0909	35.3688	2.23434	2.51788
ZHI#2.04_138.0194m/z	4746.02	4845.43	4795.73	10666.6	10756.7	10711.6	2991.11	2780.29	2885.7	2.23358	0.601723
AHI#2.26_314.0274m/z	84.7323	153.954	119.343	267.76	265.142	266.451	90.7697	68.7462	79.7579	2.23265	0.668307
RPP#11.48_296.5835m/z	5.49285	2.66466	4.07875	8.8848	9.31822	9.10151	14.337	10.9677	12.6524	2.23144	3.10202
AHI#1.95_722.1129m/z	118.64	57.5236	88.0819	240.115	152.614	196.365	82.1212	127.549	104.835	2.22934	1.1902
AHI#11.07_470.6565m/z	110.652	91.9252	101.289	254.396	197.13	225.763	143.397	123.152	133.275	2.2289	1.31579
ZHI#2.37_170.0191n	1269.34	1226.38	1247.86	2770.24	2792.33	2781.29	8473.59	8470.08	8471.84	2.22884	6.78908
RPP#1.75_359.2645m/z	91.3721	95.9289	93.6505	209.634	207.674	208.654	66.0231	66.9624	66.4927	2.22801	0.710009
AHI#1.70_629.0591m/z	175.086	206.076	190.581	467.823	381.406	424.614	249.263	206.703	227.983	2.228	1.19626
RPP#13.86_363.7773n	15068.9	5164.6	10116.8	29404.7	15672.8	22538.8	18095.7	8096.82	13096.3	2.22786	1.29451
AHI#4.97_256.0170m/z	34.4313	37.8692	36.1503	57.5731	103.363	80.4681	49.1667	43.2603	46.2135	2.22593	1.27837
AHI#7.37_874.5499m/z	234.652	197.515	216.084	496.499	465.017	480.758	206.116	169.966	188.041	2.22487	0.870224
AHI#2.36_914.7584m/z	78.6194	60.8808	69.7501	185.85	124.487	155.168	144.324	61.9108	103.117	2.22463	1.47838
RPP#2.50_219.8025m/z	7.80142	7.31571	7.55856	16.9144	16.707	16.8107	12.8241	11.536	12.1801	2.22406	1.61143
AHI#3.19_497.0742m/z	26.2092	0	13.1046	31.4023	26.8851	29.1437	71.9973	39.8824	55.9399	2.22393	4.26872
ZHI#6.66_262.9895m/z	153.933	191.652	172.792	391.874	375.756	383.815	278.961	313.456	296.208	2.22125	1.71424
RPP#11.16_679.5100m/z	4.70247	2.84298	3.77272	10.3405	6.40265	8.3716	2.39161	0.0399052	1.21576	2.21898	0.322249
AHI#1.82_491.7636m/z	29.6474	52.6241	41.1358	108.846	73.6149	91.2306	58.8734	88.3956	73.6345	2.21779	1.79004
AHI#4.47_302.9654m/z	63.8735	44.2963	54.0849	140.744	99.1246	119.934	125.32	117.09	121.205	2.21752	2.24102
ZHI#7.60_313.0298m/z	80.7225	101.249	90.9856	190.574	212.878	201.726	101.604	101.294	101.449	2.21712	1.115
AHI#2.39_622.3636m/z	4159.93	5570.2	4865.06	10689.3	10874	10781.6	4683.02	5050.87	4866.95	2.21613	1.00039
RPP#10.54_252.9252m/z	11.4712	2.2943	6.88277	14.4026	16.0892	15.2459	19.4584	9.47841	14.4684	2.21508	2.10212
RPP#5.58_169.0654m/z	42.6842	40.5668	41.6255	75.391	109.016	92.2037	40.5043	26.4947	33.4995	2.21508	0.804784
ZHI#8.17_126.0556m/z	39.4773	40.0399	39.7586	85.1951	90.8854	88.0403	52.2555	59.8342	56.0448	2.21437	1.40963
AHI#5.66_182.9637m/z	8.90868	9.17549	9.04208	20.9691	19.0703	20.0197	142.089	120.34	131.214	2.21405	14.5115
RPP#2.32_194.1391m/z	68.8536	100.184	84.5188	185.041	189.176	187.109	63.0261	55.6058	59.3159	2.21381	0.701807
AHI#4.63_366.7016m/z	44.373	15.8436	30.1083	62.1475	71.0736	66.6105	51.5449	33.9672	42.7561	2.21237	1.42008
AHI#3.86_228.0220n	403.787	448.563	426.175	965.898	919.398	942.648	1050.57	896.932	973.751	2.21188	2.28486
RPP#1.02_267.0819m/z	419.641	478.128	448.884	710.091	1275.03	992.559	533.525	577.956	555.741	2.21117	1.23805
AHI#9.28_757.9109m/z	32.472	2.27908	17.3755	53.2531	23.5706	38.4119	11.829	18.693	15.261	2.21069	0.878301
AHI#3.07_638.4643m/z	311.412	289.055	300.233	691.763	635.005	663.384	354.665	366.904	360.784	2.20956	1.20168
AHI#5.49_498.0962m/z	37.4931	11.8426	24.6678	77.3988	31.5137	54.4562	40.7713	55.4146	48.093	2.20758	1.94962
RPP#4.57_365.8244m/z	34.1795	34.719	34.4492	42.3156	109.672	75.9937	56.6158	75.67	66.1429	2.20596	1.92001
AHI#6.72_694.0107m/z	124.068	54.355	89.2117	222.547	171.037	196.792	158.743	180.286	169.514	2.2059	1.90013
AHI#9.83_510.0050m/z	16.3083	26.3282	21.3182	69.1816	24.8691	47.0253	26.2837	23.0416	24.6627	2.20587	1.15688
AHI#4.42_526.3226m/z	133.528	179.114	156.321	264.597	423.779	344.188	191.244	103.168	147.206	2.2018	0.94169
AHI#9.09_270.9774m/z	1664.2	1642.4	1653.3	3666.59	3609.38	3637.99	2113.74	1860.71	1987.23	2.20044	1.20197
ZHI#6.89_211.0953n	5333.2	5512.81	5423	11789.3	12058.5	11923.9	6016.76	5955.01	5985.89	2.19876	1.1038
RPP#13.76_386.7566m/z	189.839	75.6645	132.752	365.097	218.588	291.843	248.765	107.675	178.22	2.19841	1.3425
AHI#1.12_737.8081m/z	53.5285	262.792	158.16	317.334	377.955	347.645	86.5465	148.09	117.318	2.19805	0.741769
RPP#14.21_637.6949m/z	14.0644	11.9925	13.0285	29.4437	27.8089	28.6263	52.3994	19.3601	35.8798	2.19721	2.75395
RPP#8.01_408.2682m/z	7.58509	8.13116	7.85812	10.6081	23.9182	17.2632	8.65619	10.1764	9.41631	2.19686	1.19829
ZHI#5.50_434.1081m/z	145.099	292.461	218.78	436.017	524.748	480.383	435.928	527.737	481.833	2.19573	2.20236
AHI#1.96_410.0649m/z	22.4491	55.1035	38.7763	83.1734	87.0653	85.1194	560.482	589.052	574.767	2.19514	14.8226
AHI#15.76_656.9753m/z	12.477	25.8255	19.1513	51.8142	32.2633	42.0387	26.1792	30.5241	28.3517	2.19509	1.48041
RPP#3.52_245.8145m/z	4.62565	13.0593	8.84247	13.8676	24.932	19.3998	17.1568	18.0631	17.6099	2.19393	1.99151
ZHI#4.71_416.0992m/z	106.448	52.7668	79.6072	160.755	188.458	174.607	176.915	137.724	157.319	2.19336	1.9762
AHI#3.73_382.0500n	1907.09	1920.01	1913.55	4151.26	4241.18	4196.22	2365.65	2190.53	2278.09	2.1929	1.19051
ZHI#5.65_109.9976n	680.891	731.93	706.41	1604.56	1492.69	1548.63	3467.76	3318.11	3392.94	2.19225	4.80307
AHI#5.46_524.5041m/z	19.6821	21.8207	20.7514	53.6224	37.3377	45.48	32.7685	53.8749	43.3217	2.19166	2.08765
RPP#1.17_256.1758m/z	119.043	120.696	119.87	328.096	197.044	262.57	87.1888	68.0285	77.6086	2.19047	0.647443
AHI#11.18_279.1088n	122.334	146.537	134.436	289.448	299.495	294.471	74.4906	85.3134	79.902	2.19042	0.594351
AHI#6.32_214.0565n	135.171	128.994	132.083	267.627	310.883	289.255	153.166	186.92	170.043	2.18995	1.2874
ZHI#4.35_449.3169m/z	127.736	54.3207	91.0284	191.229	207.396	199.312	33.0298	57.201	45.1154	2.18956	0.495619
ZHI#1.01_277.2173m/z	174.862	180.154	177.508	406.33	370.909	388.619	726.371	700.552	713.461	2.18931	4.01932
AHI#10.09_180.6375m/z	10.9118	13.9819	12.4468	25.9269	28.5645	27.2457	17.039	16.9775	17.0082	2.18897	1.36647
AHI#11.14_634.0899m/z	88.6684	48.3176	68.493	137.766	162.071	149.918	75.3084	50.5046	62.9065	2.18881	0.918437
ZHI#6.37_184.0975m/z	43.4738	28.5322	36.003	70.7922	86.7528	78.7725	61.1538	38.231	49.6924	2.18794	1.38023
RPP#1.10_151.1154m/z	17.8645	10.185	14.0247	28.6047	32.7561	30.6804	0	8.06335	4.03168	2.18759	0.287469
AHI#2.01_121.1011m/z	5.77426	13.4559	9.61507	21.8545	20.171	21.0128	21.3304	14.5229	17.9266	2.1854	1.86443
RPP#13.90_548.1891m/z	25.634	16.8969	21.2654	42.7252	50.2059	46.4655	13.012	21.0972	17.0546	2.18502	0.801989
RPP#1.45_146.0145m/z	2011.82	2040.39	2026.11	4258.1	4594.37	4426.24	2288.78	2344.66	2316.72	2.1846	1.14343
AHI#3.07_421.2312m/z	170.427	124.968	147.697	392.897	252.22	322.558	247.119	209.571	228.345	2.18392	1.54604
ZHI#1.86_328.0815m/z	975.516	1044.97	1010.24	2307.62	2102.37	2204.99	2177.09	2403.69	2290.39	2.18264	2.26717
AHI#3.47_624.6976m/z	82.059	76.6503	79.3547	197.671	148.61	173.141	148.365	104.082	126.224	2.18186	1.59063
AHI#14.90_426.9785m/z	19.5106	20.7743	20.1424	48.7759	39.1004	43.9382	25.9361	21.5117	23.7239	2.18137	1.17781
AHI#4.38_388.9277m/z	32.2958	8.36982	20.3328	46.6994	41.9966	44.348	26.9642	60.5307	43.7474	2.18111	2.15157
AHI#8.03_349.6975m/z	20.0545	51.1892	35.6218	67.4204	87.944	77.6822	53.8952	57.2201	55.5576	2.18075	1.55965
RPP#9.65_243.1945m/z	4.27623	8.5226	6.39942	12.5744	15.3329	13.9537	4.56567	4.67896	4.62232	2.18046	0.722303
AHI#2.05_595.6952m/z	158.023	98.6797	128.351	283.193	276.509	279.851	55.9198	83.8053	69.8625	2.18035	0.544307
AHI#4.71_722.4420m/z	424.637	687.522	556.08	1258.51	1165.72	1212.12	1159.11	1282.72	1220.92	2.17975	2.19558
AHI#3.07_582.2796n	3950.24	4808.41	4379.32	10226.3	8856.04	9541.18	3393.84	4121.75	3757.8	2.17869	0.858077
ZHI#5.40_175.0245m/z	7238.71	6189.3	6714.01	16226	13023.2	14624.6	3726.62	3778.43	3752.52	2.17822	0.55891
AHI#1.98_307.0006m/z	19.6522	9.197	14.4246	41.8001	20.9924	31.3963	76.7624	70.3102	73.5363	2.17658	5.09798
AHI#3.07_553.3746n	12494.8	12149.9	12322.4	27185.1	26423.6	26804.4	10644.6	10876.7	10760.7	2.17526	0.873261
AHI#1.34_979.3055n	142.104	123.395	132.75	268.742	308.787	288.764	132.36	117.226	124.793	2.17525	0.940062
AHI#8.62_937.5129m/z	38.5683	25.5649	32.0666	80.0574	59.4404	69.7489	22.0223	36.1264	29.0743	2.17512	0.906684
RPP#13.62_386.7569m/z	365.504	141.014	253.259	675.385	426.216	550.801	470.628	207.685	339.156	2.17485	1.33917
RPP#6.38_931.4884m/z	11.8699	15.8362	13.8531	37.4263	22.8247	30.1255	13.3149	23.567	18.441	2.17464	1.33118
ZHI#4.73_149.0275m/z	3349.7	3686.58	3518.14	7994.9	7302.73	7648.81	9455.61	9191.02	9323.32	2.17411	2.65007
RPP#14.73_223.2061m/z	1.62625	9.08717	5.35671	11.6329	11.6407	11.6368	16.7628	14.3908	15.5768	2.17238	2.90791
AHI#5.56_581.0888m/z	8.21365	46.5277	27.3707	53.8477	65.0558	59.4518	97.9482	126.464	112.206	2.1721	4.09949
AHI#1.01_539.8224m/z	51.7499	43.4486	47.5992	110.428	96.3509	103.39	57.5765	29.2816	43.429	2.17208	0.91239
AHI#2.76_610.6911n	1540.22	1700.88	1620.55	3473.9	3563.86	3518.88	2261.12	2664.52	2462.82	2.17141	1.51974
AHI#5.73_294.9778m/z	6.12035	3.50692	4.81363	13.8985	6.99406	10.4463	20.1899	32.2809	26.2354	2.17014	5.45023
RPP#2.06_114.0548m/z	3.25121	6.33041	4.79081	9.26842	11.5169	10.3926	8.42017	3.3715	5.89583	2.16929	1.23066
ZHI#1.34_307.0458m/z	185.335	223.11	204.223	412.253	473.482	442.867	42.4655	40.5554	41.5104	2.16855	0.20326
RPP#14.90_574.0433m/z	49.0051	24.0724	36.5388	95.9152	62.4462	79.1807	75.3963	64.3918	69.894	2.16703	1.91287
AHI#5.23_256.0165m/z	175.514	174.497	175.005	401.45	356.182	378.816	287.383	224.612	255.997	2.1646	1.4628
AHI#5.04_477.9602m/z	16.6221	19.2455	17.9338	35.4145	42.2103	38.8124	49.0624	31.3229	40.1926	2.1642	2.24117
AHI#2.97_228.0757n	1322.92	1825.98	1574.45	3209.57	3604.76	3407.17	1176.96	1308.62	1242.79	2.16403	0.789346
AHI#1.51_528.7561m/z	58.804	55.7365	57.2703	116.578	130.899	123.738	121.335	79.1857	100.261	2.16061	1.75066
AHI#5.59_313.9734m/z	12.2801	11.8178	12.049	18.5728	33.4856	26.0292	13.2468	19.7186	16.4827	2.16028	1.36797
AHI#2.38_760.7177m/z	82.778	141.348	112.063	209.305	274.758	242.031	128.411	146.665	137.538	2.15978	1.22733
AHI#3.29_394.1140m/z	401.266	318.386	359.826	651.881	901.796	776.838	422.067	601.174	511.621	2.15893	1.42186
AHI#2.27_622.0310m/z	66.827	45.9189	56.373	139.879	103.477	121.678	52.7617	65.3804	59.0711	2.15845	1.04786
RPP#14.64_1055.4697m/z	21.2308	13.4558	17.3433	47.5021	27.3587	37.4304	46.8448	26.3704	36.6076	2.15821	2.11077
AHI#2.86_336.9025m/z	2.82873	6.40349	4.61611	13.2221	6.70235	9.9622	51.7537	40.2613	46.0075	2.15814	9.96671
RPP#5.93_167.4832m/z	8.10869	6.75129	7.42999	20.4923	11.5742	16.0332	14.8308	19.756	17.2934	2.15791	2.32751
RPP#12.29_779.0498m/z	22.722	2.84429	12.7832	30.0098	25.1582	27.584	33.2681	10.2766	21.7724	2.15784	1.70321
RPP#8.54_339.2504m/z	5.13851	4.26765	4.70308	7.10629	13.182	10.1441	15.8036	10.4664	13.135	2.15691	2.79285
AHI#11.14_538.0786m/z	181.901	188.434	185.168	433.126	365.466	399.296	196.753	168.675	182.714	2.15641	0.98675
RPP#6.38_242.1381m/z	35.2589	36.2742	35.7665	66.1793	88.0201	77.0997	24.5125	27.5988	26.0556	2.15564	0.728492
AHI#1.43_457.6804n	727.06	591.924	659.492	1464.26	1378.82	1421.54	1126.17	1133.37	1129.77	2.1555	1.71309
AHI#1.51_134.0808m/z	173.383	170.024	171.703	370.622	369.332	369.977	180.383	166.288	173.336	2.15475	1.00951
AHI#1.43_413.4606m/z	181.232	572.013	376.623	738.398	884.398	811.398	655.119	176.346	415.733	2.15441	1.10384
AHI#4.66_738.5317m/z	105.72	75.0359	90.3778	185.656	203.753	194.705	195.317	126.012	160.664	2.15434	1.7777
RPP#1.66_212.1027m/z	5037.94	4966.14	5002.04	10664.7	10881	10772.9	1624.08	1635.15	1629.62	2.1537	0.325791
AHI#2.95_540.0782n	386.537	385.243	385.89	933.309	727.464	830.386	767.695	718.463	743.079	2.15187	1.92562
AHI#2.48_413.0020m/z	48.2859	48.4924	48.3892	98.0159	110.201	104.108	63.0861	58.1661	60.6261	2.15148	1.25289
AHI#1.82_528.6416m/z	25.5516	31.4255	28.4886	49.7217	72.7749	61.2483	47.5365	22.9111	35.2238	2.14993	1.23642
ZHI#10.56_292.0872m/z	25.9744	45.9118	35.9431	75.1738	79.3617	77.2678	34.2128	40.9704	37.5916	2.14972	1.04586
AHI#3.67_307.0287m/z	111.201	97.4549	104.328	240.951	207.485	224.218	120.156	137.287	128.721	2.14916	1.23381
RPP#8.00_814.0318m/z	19.8404	10.7397	15.29	23.4449	42.2713	32.8581	26.6339	21.7091	24.1715	2.14899	1.58087
AHI#3.90_625.1478n	238.066	108.613	173.339	340.709	404.265	372.487	150.78	227.17	188.975	2.14889	1.0902
RPP#7.60_689.5809m/z	19.3489	14.9999	17.1744	27.276	46.5291	36.9025	62.7932	38.8665	50.8299	2.14869	2.95963
AHI#2.93_760.8328m/z	41.1648	10.8078	25.9863	80.4515	31.1967	55.8241	104.251	133.282	118.767	2.14822	4.57036
AHI#14.24_127.5841m/z	0.0266043	7.01082	3.51871	10.4648	4.65301	7.55888	9.00689	2.93444	5.97067	2.1482	1.69683
RPP#12.24_174.9007m/z	4.01298	5.77802	4.8955	11.8551	9.17657	10.5158	6.04316	11.6687	8.85592	2.14807	1.80899
ZHI#12.51_408.9564m/z	5.3708	27.3222	16.3465	44.1658	26.0491	35.1075	21.476	18.0752	19.7756	2.14771	1.20978
AHI#3.07_562.4320m/z	105.621	67.7855	86.7031	206.373	165.991	186.182	67.3539	38.5434	52.9486	2.14735	0.610689
AHI#2.10_198.0139n	282.622	161.756	222.189	391.203	563.018	477.111	4217.75	4621.91	4419.83	2.14732	19.8922
AHI#3.76_372.0725m/z	128.299	111.372	119.835	243.849	270.643	257.246	259.103	83.7025	171.403	2.14666	1.43032
RPP#1.05_490.8314m/z	19.0288	26.1208	22.5748	40.9799	55.9129	48.4464	32.5491	47.7187	40.1339	2.14604	1.77782
AHI#4.44_233.9570m/z	50.862	41.1662	46.0141	106.248	91.0331	98.6405	15.4729	22.7077	19.0903	2.1437	0.41488
AHI#6.72_433.0405m/z	20.7556	7.56428	14.16	44.3565	16.3495	30.353	24.9501	30.7746	27.8623	2.14358	1.96768
AHI#3.54_288.0717m/z	3351.79	2794.49	3073.14	6564.64	6597.31	6580.98	4847	3364.25	4105.62	2.14145	1.33597
AHI#2.00_346.9915m/z	141.088	58.9168	100.002	245.783	182.45	214.116	156.955	111.856	134.406	2.14111	1.34402
AHI#2.07_610.3708m/z	867.992	586.014	727.003	1587.31	1525.23	1556.27	670.255	707.289	688.772	2.14066	0.947413
AHI#2.24_430.0304m/z	14.6554	20.6852	17.6703	45.7283	29.814	37.7711	482.664	438.13	460.397	2.13755	26.0548
AHI#4.38_405.7922m/z	9.95012	12.0874	11.0187	31.1673	15.9384	23.5528	22.8539	34.4896	28.6717	2.13753	2.60209
RPP#11.32_554.7225m/z	31.0879	26.8339	28.9609	46.3368	77.4704	61.9036	52.9108	32.2386	42.5747	2.13749	1.47008
AHI#4.16_268.0799m/z	186.631	194.007	190.319	373.232	440.355	406.794	431.548	453.497	442.522	2.13743	2.32517
RPP#4.46_197.6027m/z	20.601	26.4513	23.5262	52.5254	48.0352	50.2803	24.4719	37.9719	31.2219	2.13721	1.32711
AHI#10.37_561.9703m/z	40.357	45.7505	43.0538	100.916	83.0616	91.9887	57.7265	17.5194	37.623	2.1366	0.87386
AHI#1.95_566.6792m/z	407.177	367.626	387.402	780.678	873.75	827.214	212.047	203.084	207.566	2.13529	0.53579
AHI#2.98_342.2023m/z	2589.89	2450.48	2520.19	5240.53	5504.14	5372.33	2951.08	2758.57	2854.83	2.13172	1.13278
AHI#1.06_252.9752m/z	18.1432	8.73121	13.4372	13.1026	44.1821	28.6423	37.219	64.4044	50.8117	2.13157	3.78141
AHI#2.12_625.0461m/z	312.964	183.814	248.389	526.871	530.699	528.785	190.02	217.258	203.639	2.12886	0.819839
RPP#1.04_533.3764m/z	196.585	178.149	187.367	387.186	410.177	398.681	203.109	232.197	217.653	2.12781	1.16164
AHI#2.41_367.9659m/z	268.254	227.082	247.668	570.477	482.748	526.612	365.38	355.143	360.261	2.12628	1.45461
ZHI#2.68_229.9620m/z	151.578	118.501	135.039	280.937	293.241	287.089	109.568	133.88	121.724	2.12596	0.901397
RPP#3.84_635.0513m/z	8.50357	33.4796	20.9916	9.19399	80.0104	44.6022	9.16898	53.1215	31.1453	2.12477	1.4837
AHI#2.39_320.9759m/z	111.516	57.3423	84.4294	193.006	165.717	179.361	119.391	65.8376	92.6143	2.12439	1.09694
AHI#15.90_458.8962m/z	25.9238	45.3969	35.6604	66.5012	84.9644	75.7328	113.394	92.7972	103.096	2.12372	2.89104
AHI#8.26_334.8727m/z	124.638	94.5257	109.582	234.635	230.771	232.703	132.086	150.76	141.423	2.12356	1.29057
AHI#1.22_430.7662m/z	280.096	302.995	291.546	571.577	666.564	619.07	289.329	331.292	310.31	2.12341	1.06436
RPP#10.94_161.1304m/z	5.93637	5.93577	5.93607	15.1783	10.0291	12.6037	12.6555	10.3661	11.5108	2.12324	1.93913
AHI#3.74_495.1570m/z	88.2735	149.659	118.966	224.404	280.613	252.508	188.719	74.0915	131.405	2.12252	1.10456
RPP#6.29_449.9873m/z	18.117	21.1637	19.6404	59.7474	23.5707	41.659	53.6309	54.6513	54.1411	2.12109	2.75662
AHI#3.80_180.9871m/z	12.2079	6.23884	9.22335	18.1537	20.947	19.5504	22.4291	15.1698	18.7994	2.11966	2.03824
AHI#7.53_474.1097m/z	150.784	245.935	198.359	424.42	416.463	420.441	357.407	288.213	322.81	2.11959	1.6274
ZHI#2.06_231.9970n	264.762	267.82	266.291	552.246	576.414	564.33	236.146	229.212	232.679	2.11922	0.873778
RPP#7.67_106.0232m/z	6.40859	5.7685	6.08854	14.3059	11.4982	12.902	14.5138	9.19522	11.8545	2.11907	1.94702
AHI#3.35_477.2443m/z	7763.68	7402.29	7582.99	15666.5	16446.7	16056.6	10617.3	9364.09	9990.68	2.11745	1.31751
RPP#5.42_112.5160m/z	11.5077	6.44689	8.9773	23	15.0096	19.0048	9.65959	12.2561	10.9578	2.11698	1.22061
AHI#2.41_494.3514m/z	46.148	32.9315	39.5398	42.2119	125.191	83.7013	165.832	78.4804	122.156	2.11689	3.08945
AHI#3.97_777.1006m/z	41.7948	29.3133	35.554	67.2389	83.2681	75.2535	56.7858	34.8203	45.803	2.1166	1.28827
ZHI#6.81_123.0083m/z	42.2316	35.6612	38.9464	80.8306	84.0002	82.4154	22.5999	20.0187	21.3093	2.11612	0.547144
ZHI#8.58_141.0186m/z	41.2938	32.3673	36.8305	81.7165	74.1392	77.9279	20.9332	14.6748	17.804	2.11585	0.483403
AHI#5.21_208.9350m/z	12.5749	26.9714	19.7731	46.4939	37.1493	41.8216	17.9665	8.07389	13.0202	2.11508	0.65848
AHI#2.26_374.0025m/z	569.379	490.255	529.817	1184.91	1055.29	1120.1	508.087	499.681	503.884	2.11413	0.951054
RPP#1.24_181.1257m/z	248.707	266.986	257.846	524.595	565.419	545.007	311.431	306.144	308.787	2.11369	1.19756
AHI#8.14_326.1488m/z	32.9064	56.9211	44.9137	112.433	77.3618	94.8972	18.087	14.1015	16.0942	2.11288	0.358337
RPP#5.23_691.4369m/z	286.462	169.65	228.056	795.894	167.321	481.607	177.886	193.454	185.67	2.11179	0.814143
AHI#4.49_644.1539m/z	57.4848	54.0169	55.7508	65.6118	169.656	117.634	123.872	151.212	137.542	2.10999	2.46708
AHI#11.16_674.6430m/z	85.5526	77.6062	81.5794	188.902	155.314	172.108	27.5623	58.3681	42.9652	2.1097	0.526667
AHI#1.15_302.1840n	1584.26	1720	1652.13	3234.67	3736.22	3485.44	1863.36	1951.91	1907.64	2.10967	1.15465
RPP#7.00_212.6616m/z	6.47988	1.97223	4.22606	7.12437	10.7059	8.91516	6.00041	13.9538	9.9771	2.10957	2.36085
AHI#6.75_875.0897m/z	38.5001	7.46712	22.9836	55.4315	41.5154	48.4735	48.484	27.1148	37.7994	2.10904	1.64462
AHI#7.72_135.0026m/z	145.265	138.008	141.636	291.042	306.314	298.678	219.239	207.739	213.489	2.10877	1.5073
AHI#2.15_539.5118m/z	129.934	87.9715	108.953	220.928	238.508	229.718	272.565	309.134	290.85	2.10842	2.6695
AHI#11.16_507.6054n	114.287	160.916	137.601	262.277	317.66	289.968	126.518	94.3915	110.455	2.10731	0.802714
RPP#9.91_130.2587m/z	8.45644	10.2489	9.35265	26.5887	12.827	19.7079	20.3032	7.41469	13.859	2.1072	1.48182
ZHI#8.66_433.1819m/z	1142.4	973.558	1057.98	2231.87	2225.41	2228.64	1650.19	1521.6	1585.89	2.1065	1.49898
RPP#5.58_552.7514m/z	71.7944	55.5539	63.6741	104.199	164.017	134.108	66.7492	98.6557	82.7024	2.10616	1.29884
AHI#3.47_501.1318m/z	272.907	230.716	251.811	587.617	472.781	530.199	444.215	325.24	384.727	2.10554	1.52784
AHI#3.54_175.0285n	1956.8	1905.54	1931.17	4070.36	4051.41	4060.89	3671.12	3591.15	3631.14	2.10281	1.88028
ZHI#8.68_358.2093m/z	138.257	90.2269	114.242	243.805	236.645	240.225	193.863	188.498	191.18	2.10278	1.67347
AHI#12.30_727.0095m/z	22.5488	15.1954	18.8721	51.2818	28.0801	39.6809	40.3991	13.0944	26.7468	2.10263	1.41727
ZHI#10.48_217.1184m/z	166.927	155.043	160.985	352.343	324.33	338.337	162.201	143.242	152.721	2.10167	0.948667
AHI#1.82_777.4388m/z	152.045	92.762	122.403	252.634	261.863	257.249	70.0832	114.435	92.2593	2.10165	0.753732
AHI#2.74_456.7713m/z	26.8279	12.4542	19.6411	51.4184	31.094	41.2562	29.4721	36.5824	33.0272	2.1005	1.68154
AHI#1.20_386.6994m/z	22.2226	12.766	17.4943	42.9928	30.4836	36.7382	11.152	1.67679	6.41441	2.10001	0.366658
AHI#8.84_649.7583m/z	111.019	118.353	114.686	248.662	232.903	240.782	149.083	193.728	171.406	2.09949	1.49456
AHI#3.07_955.7697n	4166.03	4031.3	4098.66	8785.02	8423.92	8604.47	5223.71	5273.95	5248.83	2.09934	1.28062
AHI#1.20_375.7095m/z	59.8755	56.6416	58.2586	126.286	118.238	122.262	63.7894	68.4142	66.1018	2.09861	1.13463
RPP#4.90_252.0521n	152.018	170.584	161.301	316.267	360.169	338.218	121.974	138.593	130.283	2.09682	0.807705
RPP#13.09_472.7365m/z	182.556	74.2701	128.413	363.051	175.445	269.248	231.613	98.362	164.987	2.09674	1.28482
RPP#12.52_515.2151m/z	18.9494	10.4076	14.6785	47.1673	14.378	30.7727	30.6042	22.193	26.3986	2.09645	1.79846
AHI#9.02_135.0026m/z	570.999	544.514	557.757	1205.69	1132.73	1169.21	652.626	627.11	639.868	2.09627	1.14722
RPP#12.19_521.2184m/z	12.4694	21.0131	16.7413	34.4805	35.6182	35.0494	56.0071	15.9231	35.9651	2.09359	2.14829
AHI#1.53_407.0314m/z	58.9982	31.2243	45.1112	108.728	80.0698	94.399	65.0746	8.81037	36.9425	2.09258	0.81892
AHI#8.41_346.0894m/z	1490.22	1392.52	1441.37	3095.23	2933.47	3014.35	726.337	695.703	711.02	2.09131	0.493295
RPP#8.69_633.3638m/z	21.3383	19.1226	20.2304	30.0241	54.5888	42.3065	18.7066	18.5459	18.6263	2.09123	0.920705
AHI#11.16_688.1375m/z	317.127	236.264	276.696	663.289	493.942	578.615	146.336	158.92	152.628	2.09116	0.551611
AHI#5.82_233.9693m/z	9.83347	17.0777	13.4556	19.9456	36.3009	28.1232	11.899	16.7399	14.3194	2.09008	1.0642
RPP#6.83_631.0385m/z	8.93019	25.7227	17.3265	36.9098	35.5131	36.2114	22.6967	37.7787	30.2377	2.08995	1.74518
RPP#8.59_321.9631m/z	9.69152	3.93898	6.81525	10.9615	17.5242	14.2428	11.3292	6.19248	8.76086	2.08985	1.28548
ZHI#6.53_276.0853m/z	9304.18	9134.87	9219.52	19266.4	19255.7	19261.1	12201.6	11440.7	11821.1	2.08916	1.28218
ZHI#0.91_347.2207m/z	184.794	136.231	160.513	364.132	306.391	335.262	199.08	168.738	183.909	2.08869	1.14576
AHI#15.74_832.7233m/z	40.5757	28.1549	34.3653	63.9665	79.5905	71.7785	69.3838	55.2481	62.3159	2.08869	1.81334
ZHI#8.81_428.2616m/z	36.8112	59.0868	47.949	111.553	88.7335	100.143	73.4463	97.2344	85.3404	2.08854	1.77981
RPP#5.19_1156.0427m/z	23.5747	11.367	17.4709	35.0046	37.9701	36.4874	12.782	21.0832	16.9326	2.08847	0.969192
ZHI#8.50_432.1483n	38205	48689.1	43447	88533.3	92941	90737.2	36724.1	29174.9	32949.5	2.08846	0.758384
RPP#13.46_378.5663m/z	10.2489	11.677	10.9629	21.8961	23.8943	22.8952	19.0037	16.9046	17.9542	2.08841	1.63771
AHI#9.40_736.4290m/z	768.272	825.77	797.021	1574.85	1754.04	1664.44	1042.3	967.152	1004.72	2.08833	1.2606
RPP#11.11_537.9770m/z	12.277	10.8477	11.5623	22.0045	26.2828	24.1437	6.37662	16.4296	11.4031	2.08813	0.986229
AHI#9.99_733.0293m/z	167.919	179.264	173.591	401.489	323.315	362.402	222.724	193.595	208.16	2.08767	1.19914
AHI#5.04_780.9609m/z	40.2245	22.292	31.2583	77.843	52.4762	65.1596	73.4576	99.5583	86.508	2.08455	2.76752
ZHI#6.48_145.0734n	4461	4425.22	4443.11	9385.93	9133.14	9259.53	5523.56	5392.39	5457.98	2.08402	1.22841
AHI#1.03_539.6926m/z	5.95889	36.0851	21.022	41.6887	45.8827	43.7857	19.3929	23.7192	21.5561	2.08285	1.02541
RPP#10.97_785.4658m/z	4.91672	8.41131	6.66401	18.7667	8.98476	13.8757	20.4648	9.17657	14.8207	2.08219	2.22399
RPP#8.14_357.0394m/z	3.35734	8.95112	6.15423	12.652	12.9723	12.8121	6.32998	6.65522	6.4926	2.08184	1.05498
AHI#2.52_211.2054m/z	40.1105	24.0898	32.1001	64.0079	69.6359	66.8219	36.5413	34.7385	35.6399	2.08167	1.11027
RPP#7.72_167.5799m/z	8.72017	8.24229	8.48123	9.2114	26.0958	17.6536	11.727	20.2402	15.9836	2.08149	1.88459
RPP#1.63_147.5940m/z	42.9052	39.765	41.3351	101.754	70.2716	86.0128	18.0221	14.1325	16.0773	2.08086	0.388949
RPP#2.13_670.2422m/z	10.4811	26.1792	18.3302	37.8565	38.4088	38.1326	39.8219	41.6089	40.7154	2.08032	2.22123
RPP#12.66_386.7572m/z	473.158	170.353	321.755	845.084	492.95	669.017	669.555	312.021	490.788	2.07927	1.52535
RPP#8.08_138.5207m/z	2.91802	8.01555	5.46678	11.1511	11.58	11.3655	5.1945	1.51748	3.35599	2.07902	0.613888
AHI#1.06_188.1643m/z	61.9569	52.3795	57.1682	139.189	98.4806	118.835	93.5207	80.8854	87.2031	2.07868	1.52538
AHI#4.19_363.0315m/z	32.013	59.7628	45.8879	121.662	69.0756	95.3688	56.9399	56.7422	56.8411	2.0783	1.2387
AHI#9.12_150.9761m/z	6.50565	11.5746	9.04013	21.0603	16.508	18.7842	15.3757	14.2292	14.8025	2.07786	1.63742
AHI#1.51_580.6963m/z	272.822	309.482	291.152	610.134	599.324	604.729	406.649	411.52	409.084	2.07702	1.40506
AHI#8.27_166.9504m/z	370.256	356.126	363.191	760.73	747.512	754.121	391.062	375.072	383.067	2.07637	1.05472
AHI#2.31_392.2535m/z	263.723	190.801	227.262	453.84	489.421	471.631	313.02	411.054	362.037	2.07527	1.59303
AHI#2.01_844.9953n	434.272	303.052	368.662	742.807	786.968	764.887	273.336	342.821	308.078	2.07477	0.835666
AHI#3.07_806.6339m/z	164.01	177.297	170.654	379.976	327.995	353.985	103.575	190.149	146.862	2.07429	0.860586
AHI#9.29_357.0620m/z	1076.13	1069.82	1072.97	2370.86	2078.69	2224.77	1796.11	1643.7	1719.9	2.07346	1.60293
AHI#2.93_178.8806m/z	130.115	113.371	121.743	253.035	251.732	252.383	174.495	144.517	159.506	2.07308	1.31018
AHI#2.14_1000.9284m/z	51.3696	41.5582	46.4639	95.8852	96.7563	96.3208	53.7664	86.2388	70.0026	2.07302	1.5066
ZHI#5.53_303.1712m/z	53.4871	84.7008	69.094	149.291	136.909	143.1	26.6813	77.811	52.2462	2.0711	0.756161
ZHI#2.81_444.8191m/z	47.705	28.0419	37.8734	79.6082	77.2142	78.4112	154.147	121.784	137.966	2.07035	3.64281
RPP#1.02_213.0005m/z	135.316	135.936	135.626	182.158	379.187	280.673	185.304	175.306	180.305	2.06946	1.32942
RPP#11.89_237.6266m/z	5.79967	3.92634	4.863	6.5931	13.5212	10.0571	7.99047	1.66793	4.8292	2.06809	0.993048
AHI#2.83_262.8320m/z	27.5127	29.1923	28.3525	55.5067	61.717	58.6118	46.2713	44.6037	45.4375	2.06725	1.60259
AHI#4.71_540.1376n	3653.14	4183.36	3918.25	7070.53	9124.62	8097.58	3250.39	3244.55	3247.47	2.06663	0.828805
RPP#14.38_551.2264m/z	4.32079	10.1954	7.25807	20.7517	9.24741	14.9996	30.3885	32.5954	31.492	2.0666	4.33889
AHI#7.36_630.3979m/z	82.291	77.7776	80.0343	182.77	148.017	165.394	63.4418	101.923	82.6822	2.06653	1.03308
AHI#3.24_810.3639m/z	12.4183	26.3064	19.3623	0	80.0098	40.0049	21.2888	0.297476	10.7931	2.06612	0.557429
RPP#13.95_515.2122m/z	48.6739	15.7099	32.1919	72.0012	60.9919	66.4965	43.2838	21.6195	32.4517	2.06563	1.00807
AHI#13.74_577.4406m/z	26.0514	1.02912	13.5403	24.767	31.1315	27.9493	54.1417	24.7244	39.433	2.06416	2.91228
AHI#3.07_703.5977n	3322.89	3134.94	3228.92	7191.63	6137.06	6664.34	3870.35	4220.92	4045.64	2.06396	1.25294
AHI#1.93_626.8638m/z	68.1273	16.0449	42.0861	98.6996	74.9182	86.8089	59.0171	80.3362	69.6766	2.06265	1.65557
AHI#11.16_674.1407m/z	114.224	98.2839	106.254	231.741	206.587	219.164	38.1583	41.5249	39.8416	2.06264	0.374965
RPP#9.37_460.2329m/z	0.774071	10.3465	5.56028	16.3625	6.56261	11.4626	5.90253	23.6575	14.78	2.06151	2.65815
RPP#14.57_403.7457m/z	38.5315	20.0732	29.3023	84.4665	36.2788	60.3727	59.3935	34.3113	46.8524	2.06034	1.59893
ZHI#4.09_284.0286m/z	282.486	190.219	236.352	467.622	506.104	486.863	190.244	215.522	202.883	2.0599	0.858393
RPP#6.08_346.4644m/z	20.7307	16.1432	18.437	28.5096	47.4379	37.9738	22.2624	28.1894	25.2259	2.05965	1.36823
AHI#5.94_550.1221m/z	49.06	51.8808	50.4704	111.604	96.1955	103.9	78.1633	112.329	95.246	2.05863	1.88717
ZHI#6.73_376.1252m/z	1643.53	1673.6	1658.57	3434.22	3393.38	3413.8	1501.95	1523.74	1512.85	2.05828	0.91214
ZHI#5.68_204.0332m/z	85.0408	89.9235	87.4821	179.959	180.006	179.982	72.5128	103.579	88.0459	2.05736	1.00644
AHI#2.29_645.6538m/z	279.398	224.2	251.799	474.911	560.91	517.911	363.762	384.1	373.931	2.05684	1.48504
RPP#1.17_528.2639m/z	114.747	77.512	96.1294	235.518	159.906	197.712	137.363	138.42	137.891	2.05673	1.43444
AHI#3.28_491.1586m/z	549.175	370.619	459.897	1166.27	725.04	945.654	450.789	294.316	372.553	2.05623	0.810078
ZHI#6.81_305.0174m/z	54.2413	48.9685	51.6049	86.7184	125.347	106.032	5.21881	22.1956	13.7072	2.0547	0.265618
AHI#8.86_691.1569m/z	273.891	200.031	236.961	505.295	467.68	486.487	261.842	273.739	267.791	2.05303	1.1301
ZHI#8.73_422.1067m/z	170.503	211.136	190.82	403.688	379.691	391.689	393.08	354.817	373.948	2.05267	1.95969
RPP#5.65_474.1696m/z	78.9582	56.6668	67.8125	161.461	116.873	139.167	101.791	109.804	105.798	2.05223	1.56015
AHI#3.05_434.1636n	10986	11796.5	11391.2	22394.4	24357.1	23375.8	8903.75	9690.73	9297.24	2.05208	0.816175
AHI#3.14_781.8935m/z	240.331	392.903	316.617	748.698	550.64	649.669	729.575	1036.1	882.838	2.05191	2.78835
ZHI#9.07_896.4976m/z	60.4678	43.0392	51.7535	109.002	103.373	106.188	177.706	190.737	184.221	2.0518	3.55959
AHI#3.07_910.7372m/z	1567.97	1528.82	1548.4	3194.34	3158.66	3176.5	1778.31	1810.35	1794.33	2.05148	1.15883
AHI#8.88_623.1693m/z	693.193	736.228	714.711	1454.39	1477.95	1466.17	941.043	874.042	907.542	2.05142	1.2698
RPP#7.27_242.9221m/z	4.4325	2.47355	3.45303	2.80643	11.3545	7.08045	5.08578	8.65608	6.87093	2.05051	1.98983
AHI#1.70_543.0718m/z	131.073	81.8827	106.478	214.058	222.607	218.332	215.649	331.801	273.725	2.0505	2.57072
RPP#7.02_212.0588m/z	9.26912	15.0069	12.138	20.5387	29.2391	24.8889	10.1872	6.96671	8.57696	2.05049	0.706619
AHI#4.45_150.0063m/z	81.6064	95.3739	88.4901	179.291	183.429	181.36	9.67968	10.1489	9.91431	2.04949	0.112039
AHI#3.74_315.2034m/z	10.314	12.7586	11.5363	24.8629	22.4224	23.6427	60.134	20.4039	40.2689	2.04941	3.49062
RPP#13.95_578.7031m/z	43.1934	56.8341	50.0137	91.5746	113.337	102.456	89.8223	90.0841	89.9532	2.04856	1.79857
RPP#10.35_319.9380m/z	18.1246	13.0776	15.6011	16.7422	47.1684	31.9553	42.6222	31.1137	36.8679	2.04827	2.36316
RPP#1.09_172.1202m/z	72.844	55.5154	64.1797	136.276	126.616	131.446	61.6705	39.828	50.7493	2.04809	0.790737
RPP#7.60_804.3856m/z	11.2361	17.1293	14.1827	20.2148	37.8791	29.0469	22.9078	20.5562	21.732	2.04805	1.53229
AHI#1.84_796.9753m/z	780.851	868.152	824.502	1609.51	1765.88	1687.7	518.329	477.818	498.073	2.04693	0.60409
AHI#2.01_379.0233n	128.822	132.546	130.684	256.464	278.488	267.476	287.66	252.917	270.288	2.04673	2.06825
AHI#3.19_874.4845m/z	183.341	268.429	225.885	392.166	532.399	462.282	143.816	224.59	184.203	2.04654	0.815473
RPP#7.63_351.6627m/z	15.7482	22.4104	19.0793	39.4497	38.6342	39.0419	12.7181	19.0913	15.9047	2.0463	0.833611
AHI#9.97_389.5250n	65.8232	68.2733	67.0482	109.706	164.538	137.122	66.3859	30.0048	48.1954	2.04513	0.718816
ZHI#4.83_373.0767n	532.172	501.733	516.952	1125.05	989.056	1057.05	3122.42	3081.02	3101.72	2.04478	6.00001
ZHI#1.45_244.0073m/z	61.3102	33.3317	47.321	108.032	85.481	96.7563	1892.71	1816.84	1854.77	2.04468	39.1956
AHI#2.95_280.0182n	188.758	148.287	168.523	365.823	323.286	344.555	431.029	297.772	364.4	2.04456	2.16232
AHI#2.07_516.9841m/z	47.771	54.2846	51.0278	116.946	91.7116	104.329	226.198	228.139	227.169	2.04455	4.45186
RPP#4.69_819.1798m/z	8.00041	19.1937	13.597	14.6444	40.9392	27.7918	20.7724	25.4749	23.1237	2.04396	1.70064
AHI#8.12_230.1860m/z	312.454	319.251	315.852	614.532	676.333	645.432	470.846	495.15	482.998	2.04346	1.52919
RPP#3.21_190.0561m/z	8.83939	22.6082	15.7238	28.6153	35.6413	32.1283	24.8382	12.8398	18.839	2.04329	1.19812
AHI#16.59_348.5062m/z	13.718	15.4099	14.5639	36.5356	22.9698	29.7527	23.3048	11.6712	17.488	2.0429	1.20078
AHI#3.09_302.0674m/z	1074.45	1121.99	1098.22	1979.13	2507.18	2243.16	1005.51	1127.05	1066.28	2.04253	0.970914
RPP#2.34_175.0861m/z	42.7677	45.7195	44.2436	89.1877	91.3853	90.2865	124.992	156.535	140.763	2.04067	3.18155
AHI#2.24_610.7062m/z	28.3241	42.645	35.4845	76.8323	67.9562	72.3942	17.8625	4.13259	10.9975	2.04016	0.309925
AHI#4.83_800.5103m/z	34.1207	36.1687	35.1447	94.6645	48.6963	71.6804	143.404	59.1633	101.284	2.03958	2.8819
AHI#6.75_508.1604m/z	82.732	65.2485	73.9903	149.355	152.428	150.891	81.7268	121.093	101.41	2.03934	1.37058
AHI#8.52_150.9764m/z	155.373	139.588	147.481	309.835	291.497	300.666	188.629	175.838	182.233	2.03868	1.23564
AHI#3.03_229.0393n	30.6923	66.2716	48.4819	106.041	91.5894	98.8151	41.194	60.894	51.044	2.03818	1.05285
AHI#11.73_636.9770m/z	46.474	32.941	39.7075	90.4277	71.4282	80.9279	71.3738	42.5903	56.9821	2.0381	1.43504
ZHI#2.04_341.0464m/z	3679.29	3527.69	3603.49	7474.04	7214.39	7344.21	2156.21	2588.17	2372.19	2.03808	0.658303
RPP#14.70_880.6842m/z	8.74988	45.6162	27.183	59.3441	51.4407	55.3924	135.525	38.0973	86.811	2.03776	3.19357
RPP#1.24_299.0747m/z	208.795	199.71	204.252	387.537	444.643	416.09	135.048	181.104	158.076	2.03714	0.773926
ZHI#4.83_274.0394m/z	668.545	676.79	672.668	1381.18	1359.39	1370.28	750.672	840.127	795.399	2.03709	1.18245
AHI#2.34_458.3850m/z	359.612	319.042	339.327	733.914	648.081	690.997	581.77	600.243	591.006	2.03638	1.7417
AHI#3.21_561.6773m/z	90.3746	60.8277	75.6011	128.103	179.733	153.918	127.238	120.167	123.702	2.03592	1.63625
RPP#14.07_408.8129m/z	11.7118	12.0088	11.8603	21.967	26.3175	24.1422	34.023	26.4701	30.2465	2.03555	2.55023
AHI#6.01_678.0606m/z	197.993	99.1087	148.551	288.807	315.765	302.286	307.937	266.043	286.99	2.0349	1.93193
AHI#14.26_318.8609m/z	19.1658	14.8444	17.0051	24.4427	44.7408	34.5917	18.7411	24.7222	21.7316	2.0342	1.27795
AHI#3.19_756.5990m/z	883.371	723.906	803.639	1657.68	1611.68	1634.68	1102.7	1000.82	1051.76	2.0341	1.30875
RPP#3.98_610.5476m/z	15.5964	26.7434	21.1699	40.706	45.4078	43.0569	26.1363	13.608	19.8722	2.03387	0.938699
AHI#4.85_459.0008m/z	279.347	257.029	268.188	543.817	546.82	545.318	512.36	467.725	490.043	2.03334	1.82724
ZHI#5.73_156.1027m/z	253.371	247.027	250.199	477.451	539.893	508.672	1588.19	1617.31	1602.75	2.03307	6.40589
AHI#3.92_633.2188m/z	153.225	328.013	240.619	332.941	644.842	488.891	424.017	262.389	343.203	2.03181	1.42633
RPP#11.63_904.0327m/z	5.9803	2.63691	4.3086	0.274294	17.225	8.74962	4.93882	7.25156	6.09519	2.03073	1.41466
ZHI#8.63_308.6154m/z	5.4065	27.5797	16.4931	40.0193	26.9496	33.4844	28.147	21.9379	25.0425	2.03021	1.51836
RPP#8.10_193.4927m/z	8.70441	10.06	9.38223	14.9292	23.1554	19.0423	13.3663	15.0489	14.2076	2.02961	1.51431
ZHI#1.70_181.1098n	15483.7	14710.3	15097	29643.8	31633.9	30638.9	39875.6	39840.7	39858.1	2.02947	2.64014
AHI#1.36_871.3287n	1478.03	1826.98	1652.5	3008.28	3697.44	3352.86	2392.26	2782.12	2587.19	2.02896	1.56562
RPP#12.82_309.0961m/z	14.9463	12.1365	13.5414	26.2842	28.658	27.4711	5.36127	13.9586	9.65995	2.02868	0.713365
ZHI#5.53_235.0295m/z	268.727	310.965	289.846	586.298	589.699	587.998	208.928	228.032	218.48	2.02866	0.753779
RPP#1.78_242.1133m/z	2482.1	2440.58	2461.34	5018.72	4965.77	4992.25	1467.55	1483.69	1475.62	2.02826	0.59952
ZHI#6.58_255.0614m/z	17.9716	0	8.98578	16.8637	19.5767	18.2202	13.8433	7.37344	10.6084	2.02767	1.18057
AHI#3.07_724.6462m/z	7813.31	7583.12	7698.21	15989.5	15228.7	15609.1	10811.2	10203	10507.1	2.02762	1.36487
AHI#8.90_573.7825m/z	3811.14	3752.46	3781.8	7571.19	7764.57	7667.88	4665.12	4951.58	4808.35	2.02758	1.27145
AHI#2.10_982.8859m/z	76.1628	39.0067	57.5848	98.0993	135.407	116.753	114.529	95.5543	105.042	2.0275	1.82412
AHI#4.95_230.0448m/z	54.4581	64.0503	59.2542	113.606	126.615	120.11	157.748	145.105	151.426	2.02704	2.55554
AHI#3.24_276.0533m/z	38.7398	53.2835	46.0116	57.728	128.787	93.2574	19.3178	27.5666	23.4422	2.02682	0.509483
RPP#4.72_247.1421m/z	30.301	21.6468	25.9739	41.2302	64.011	52.6206	33.9626	6.56877	20.2657	2.0259	0.780233
RPP#11.41_563.9109m/z	32.7581	11.3023	22.0302	37.3851	51.8363	44.6107	43.2627	25.3694	34.3161	2.02498	1.55768
AHI#3.29_318.1006m/z	1496.51	1059.62	1278.06	2711.15	2463.88	2587.52	1713.12	1267.77	1490.44	2.02456	1.16617
ZHI#7.43_355.1624m/z	691.938	716.817	704.377	1482.14	1368.9	1425.52	697.435	759.946	728.691	2.0238	1.03452
RPP#1.09_228.0980m/z	405.601	390.77	398.185	790.042	821.209	805.625	375.291	350.013	362.652	2.02324	0.910762
AHI#3.07_994.8266m/z	5147.2	5059.42	5103.31	10501.4	10145.9	10323.7	7611.67	7884.57	7748.12	2.02293	1.51826
RPP#1.57_379.9202m/z	78.3805	57.0202	67.7004	154.001	119.792	136.896	110.599	158.861	134.73	2.02209	1.99009
AHI#8.86_656.6616m/z	608.491	594.595	601.543	1250.59	1182.04	1216.31	699.387	709.557	704.472	2.02199	1.17111
RPP#13.60_535.6809m/z	15.8643	15.5715	15.7179	21.7394	41.7506	31.745	27.8447	29.8767	28.8607	2.01967	1.83617
RPP#1.04_473.3440m/z	29.4161	36.4892	32.9527	69.0697	64.0267	66.5482	21.3026	24.2957	22.7992	2.01951	0.691876
AHI#3.59_246.1446m/z	433.867	378.406	406.136	834.873	805.358	820.116	495.836	453.662	474.749	2.01931	1.16894
AHI#4.14_625.0099m/z	153.324	118.208	135.766	289.916	258.355	274.136	328.282	269.918	299.1	2.01918	2.20305
RPP#6.41_594.5679m/z	28.3574	39.9146	34.136	76.8753	60.9373	68.9063	96.3875	98.0856	97.2366	2.01858	2.84851
AHI#3.59_329.1715m/z	472.113	423.19	447.651	732.894	1073.86	903.379	244.969	299.259	272.114	2.01804	0.607871
RPP#12.89_361.7459m/z	9.73736	12.0788	10.9081	18.7653	25.2513	22.0083	26.4046	13.4255	19.915	2.01762	1.82572
AHI#9.62_474.2541m/z	166.003	99.7061	132.855	274.941	261.101	268.021	201.452	235.321	218.386	2.0174	1.6438
AHI#3.76_231.0449m/z	46.4072	80.4793	63.4433	111.888	144.055	127.972	129.028	79.9864	104.507	2.01711	1.64726
RPP#8.50_301.2535m/z	11.3381	3.73027	7.53418	15.7608	14.6182	15.1895	4.68198	11.268	7.97501	2.01608	1.05851
ZHI#6.42_370.0824m/z	220.023	173.355	196.689	428.881	364.093	396.487	455.841	443.26	449.55	2.01581	2.28559
AHI#2.19_352.9839m/z	98.5529	122.572	110.562	243.24	202.4	222.82	135.445	113.973	124.709	2.01533	1.12795
AHI#2.33_183.1741m/z	47.3292	88.9735	68.1513	129.45	145.108	137.279	100.608	106.52	103.564	2.01433	1.51962
ZHI#9.07_443.0581m/z	53.7887	76.1194	64.954	118.982	142.608	130.795	107.893	69.6653	88.779	2.01366	1.3668
RPP#2.76_187.1439m/z	123.357	163.42	143.388	281.116	295.949	288.533	121.931	153.642	137.786	2.01225	0.960932
AHI#4.64_548.8217m/z	35.9876	31.6217	33.8046	43.3474	92.6631	68.0052	145.76	34.0855	89.923	2.01171	2.66008
AHI#15.38_477.8954m/z	25.3301	39.0118	32.171	89.4576	39.9761	64.7169	54.9528	50.8938	52.9233	2.01166	1.64507
ZHI#9.02_712.7949m/z	52.1558	91.0781	71.617	161.056	127.054	144.055	94.7194	75.5884	85.1539	2.01146	1.18902
ZHI#3.83_399.1677m/z	5688.52	6559.05	6123.79	12887	11743.8	12315.4	5909	5836.67	5872.83	2.01108	0.95902
AHI#6.35_318.6736m/z	56.8892	59.4637	58.1764	101.384	132.605	116.994	80.6259	103.32	91.9729	2.01102	1.58093
RPP#5.72_959.5222m/z	11.7687	10.1313	10.95	16.7513	27.2899	22.0206	21.9268	23.6491	22.7879	2.01102	2.08109
AHI#1.01_988.1299m/z	23.6509	97.4825	60.5667	103.688	139.873	121.781	34.9749	47.0561	41.0155	2.01068	0.677195
RPP#4.25_541.1440m/z	0	20.0857	10.0429	8.47061	31.8822	20.1764	41.474	37.5591	39.5165	2.00903	3.93478
AHI#3.95_488.9061m/z	33.8756	44.0103	38.9429	94.2979	62.1499	78.2239	101.613	37.8166	69.715	2.00868	1.79018
ZHI#6.89_233.0775m/z	481.725	518.801	500.263	984.001	1025.57	1004.78	1047.73	939.191	993.461	2.00851	1.98588
AHI#2.33_298.9460m/z	3.68394	7.22077	5.45236	10.4547	11.4438	10.9492	130.704	151.986	141.345	2.00816	25.9237
AHI#9.50_270.9775m/z	428.596	375.255	401.925	829.184	784.936	807.06	651.749	560.799	606.274	2.00799	1.50842
RPP#1.02_272.9875m/z	51.8935	75.2572	63.5753	113.978	141.335	127.656	89.3214	84.3645	86.8429	2.00796	1.36599
ZHI#5.12_204.0330m/z	87.7273	124.731	106.229	195.806	230.684	213.245	81.4407	121.709	101.575	2.00741	0.95619
ZHI#6.19_192.0137m/z	58.3996	44.9774	51.6885	100.602	106.781	103.691	129.497	155.157	142.327	2.00608	2.75356
ZHI#4.83_246.9836m/z	33.9715	31.4617	32.7166	77.3283	53.8961	65.6122	2042.44	1653.4	1847.92	2.00547	56.4826
AHI#7.63_132.9870m/z	7.92578	7.25112	7.58845	19.8135	10.601	15.2073	33.9413	37.0312	35.4863	2.004	4.67635
AHI#8.52_557.2122m/z	38.577	34.5038	36.5404	101.005	45.3898	73.1973	41.2723	53.4585	47.3654	2.00319	1.29625
AHI#1.10_654.3902m/z	108.54	313.555	211.048	441.86	403.653	422.757	358.897	318.459	338.678	2.00313	1.60475
RPP#14.94_960.4242m/z	21.9393	16.4421	19.1907	46.3589	30.5164	38.4376	22.3597	20.1946	21.2771	2.00293	1.10872
RPP#5.00_216.5538m/z	22.6095	9.33578	15.9726	51.117	12.8533	31.9851	8.86862	4.32624	6.59743	2.00249	0.413046
RPP#7.67_565.9648m/z	35.1282	24.2664	29.6973	66.5077	52.3726	59.4401	87.1459	84.0908	85.6183	2.00153	2.88303
AHI#4.54_218.9663m/z	3.95018	7.11185	5.53101	12.7374	9.39458	11.066	309.106	311.362	310.234	2.00072	56.0899
AHI#11.18_581.1325n	232.756	262.177	247.466	493.881	496.317	495.099	197.104	148.662	172.883	2.00067	0.698613
ZHI#10.97_284.1360m/z	201.181	196.066	198.624	403.237	390.812	397.024	216.73	186.895	201.813	1.99888	1.01606
AHI#7.84_408.0867n	138.439	82.7171	110.578	251.387	190.647	221.017	207.312	178.276	192.794	1.99874	1.7435
AHI#6.35_150.9764m/z	64.7802	84.6022	74.6912	139.756	158.785	149.27	83.4369	72.6547	78.0458	1.9985	1.04491
RPP#13.70_896.0302m/z	76.3245	39.1585	57.7415	121.325	109.466	115.396	157.904	56.8195	107.362	1.99849	1.85936
ZHI#0.91_477.3602m/z	20.6607	8.83169	14.7462	32.7578	26.1598	29.4588	42.517	31.2106	36.8638	1.99772	2.49989
AHI#1.98_550.0064n	558.461	297.548	428.004	855.336	854.491	854.913	726.02	834.949	780.484	1.99744	1.82354
RPP#8.36_825.0320m/z	12.5989	16.5257	14.5623	27.7329	30.4219	29.0774	14.8103	26.014	20.4121	1.99676	1.40171
AHI#1.89_818.4907m/z	1902.46	1843.92	1873.19	3601.89	3876.19	3739.04	1768.72	1787.13	1777.93	1.99608	0.949146
RPP#1.38_505.9711m/z	107.4	123.807	115.603	206.872	254.495	230.683	105.577	133.567	119.572	1.99547	1.03433
RPP#6.64_571.6270m/z	33.7359	52.227	42.9815	79.0893	92.3788	85.7341	31.7726	51.0883	41.4304	1.99467	0.963914
AHI#1.91_818.9885m/z	1617.88	1447.23	1532.55	3081.82	3031	3056.41	1519.49	1560.81	1540.15	1.99432	1.00496
ZHI#5.09_453.1279m/z	563.426	526.997	545.211	1156.03	1018.38	1087.2	1180.55	1280.06	1230.31	1.99409	2.25657
AHI#2.95_482.0742n	606.308	588.065	597.187	1129.17	1252.17	1190.67	1554.31	1273.96	1414.14	1.9938	2.368
RPP#11.74_282.2499m/z	12.9974	9.59559	11.2965	25.8386	19.206	22.5223	16.996	21.4722	19.2341	1.99375	1.70267
ZHI#1.81_247.0275m/z	2532.4	2642.84	2587.62	5066.67	5250.6	5158.64	4935.94	4759.73	4847.84	1.99358	1.87347
RPP#1.61_180.8990m/z	11.8206	20.3351	16.0778	31.3752	32.6995	32.0374	28.1959	25.4436	26.8198	1.99264	1.66812
AHI#8.86_690.6553m/z	365.792	394.436	380.114	804.116	710.504	757.31	428.337	405.33	416.833	1.99232	1.0966
RPP#1.85_255.5310m/z	71.4007	53.1348	62.2677	120.683	127.324	124.003	38.795	31.3937	35.0943	1.99145	0.563604
AHI#3.36_182.0690n	13068.7	12861.3	12965	26122.9	25505.7	25814.3	25380.3	25594.3	25487.3	1.99108	1.96586
RPP#12.00_800.8093m/z	8.7395	3.70511	6.22231	13.7062	11.0699	12.388	12.0676	5.13975	8.60368	1.99091	1.38272
AHI#5.56_397.0100m/z	13.474	24.4576	18.9658	31.9617	43.5481	37.7549	5.85876	37.0371	21.4479	1.99069	1.13088
RPP#2.04_658.2539m/z	12.1539	12.2759	12.2149	30.3818	18.2498	24.3158	16.0582	17.9245	16.9914	1.99067	1.39104
AHI#9.88_334.2125m/z	35.0661	18.8356	26.9509	66.8128	40.446	53.6294	49.1176	63.8187	56.4681	1.98989	2.09522
AHI#4.44_111.0431n	9715.21	10063.3	9889.28	19211	20143.9	19677.5	2498.23	2556.86	2527.54	1.98978	0.255584
AHI#3.24_406.1023m/z	877.201	776.904	827.053	1626.74	1664.49	1645.61	1140.55	1248.09	1194.32	1.98973	1.44407
AHI#13.51_541.3590m/z	32.4005	42.8168	37.6086	69.8188	79.826	74.8224	84.3327	102.976	93.6543	1.9895	2.49023
AHI#8.39_809.9644m/z	186.916	239.282	213.099	395.615	452.28	423.948	215.445	250.924	233.185	1.98944	1.09426
ZHI#1.40_197.0090m/z	408.694	497.091	452.893	897.023	903.74	900.382	743.888	776.445	760.166	1.98807	1.67847
RPP#13.62_880.1995m/z	39.655	37.9742	38.8146	62.3707	91.8965	77.1336	87.1149	84.5025	85.8087	1.98723	2.21073
AHI#1.12_431.0121m/z	12.8432	56.6233	34.7332	75.0231	62.9301	68.9766	184.897	164.827	174.862	1.9859	5.03442
AHI#3.69_152.1435m/z	28.2873	16.7282	22.5077	30.7036	58.6619	44.6828	19.4162	19.814	19.6151	1.98522	0.871482
AHI#5.94_245.9831m/z	40.2441	45.5382	42.8912	78.7796	91.4881	85.1339	66.3411	82.1068	74.2239	1.98488	1.73052
RPP#1.47_261.9894n	1085.86	988.112	1036.98	1905.45	2210.35	2057.9	1144.43	1106.93	1125.68	1.9845	1.08553
AHI#1.24_406.7374m/z	162.908	118.468	140.688	299.153	259.188	279.171	132.401	149.843	141.122	1.98432	1.00308
RPP#3.89_625.1168m/z	52.2223	25.7817	39.002	106.937	47.8406	77.389	47.7545	83.1177	65.4361	1.98423	1.67776
RPP#2.03_204.7363m/z	4.78516	9.34428	7.06472	17.081	10.9469	14.014	7.23765	8.11334	7.6755	1.98366	1.08645
RPP#13.48_552.4146m/z	97.3893	29.3659	63.3776	193.746	57.6798	125.713	84.2223	37.213	60.7177	1.98355	0.95803
AHI#5.59_150.9978m/z	13.3333	15.0031	14.1682	26.7122	29.492	28.1021	14.0419	14.6809	14.3614	1.98346	1.01364
AHI#5.96_612.3901m/z	57.2689	27.4303	42.3496	102.094	65.8895	83.9916	93.4132	79.2495	86.3313	1.98329	2.03854
RPP#2.79_174.0775m/z	41.9167	55.4293	48.673	94.198	98.8016	96.4998	200.964	194.559	197.762	1.98262	4.06306
ZHI#8.17_385.0382n	132.696	170.701	151.698	274.265	327.078	300.672	1781.06	1887.4	1834.23	1.98204	12.0913
AHI#4.63_246.0361m/z	71.6224	67.8818	69.7521	132.16	144.314	138.237	148.603	175.692	162.147	1.98183	2.32462
AHI#5.18_542.8350m/z	59.9005	29.3787	44.6396	114.44	62.4385	88.4393	104.31	103.481	103.896	1.98118	2.32743
AHI#2.10_498.9760m/z	28.1513	24.9487	26.55	62.1449	43.0402	52.5925	211.586	193.239	202.413	1.98089	7.62383
AHI#7.84_422.0365m/z	68.3442	70.8174	69.5808	160.904	114.727	137.816	123.979	83.08	103.53	1.98066	1.4879
AHI#8.45_302.9250m/z	101.98	72.6329	87.3063	179.152	166.644	172.898	102.61	105.558	104.084	1.98037	1.19217
ZHI#7.40_306.1568m/z	229.516	186.787	208.152	341.927	482.25	412.088	193.282	184.682	188.982	1.97975	0.907907
ZHI#5.65_212.9802m/z	203.908	216.159	210.034	413.913	417.676	415.795	1848.57	1762.26	1805.41	1.97966	8.59584
ZHI#8.63_302.9286m/z	67.2921	63.6008	65.4464	108.779	150.332	129.555	7.85762	5.56777	6.71269	1.97956	0.102568
RPP#7.68_936.1348m/z	6.23474	10.1616	8.19815	11.5843	20.8641	16.2242	10.1096	11.0463	10.578	1.97901	1.29029
AHI#1.44_959.3816n	1461.79	1168.66	1315.22	2583.54	2621.17	2602.36	1826.71	1872.83	1849.77	1.97864	1.40643
RPP#9.51_206.6220m/z	16.0854	15.4092	15.7473	29.002	33.3042	31.1531	13.5362	13.415	13.4756	1.97831	0.855739
RPP#3.35_279.1135m/z	1127.45	1202.61	1165.03	2334.95	2272.06	2303.51	1446.37	1447.47	1446.92	1.97721	1.24196
RPP#4.22_235.1802m/z	17.4672	8.88694	13.1771	27.0953	25.006	26.0506	3.69097	5.73458	4.71277	1.97697	0.35765
AHI#2.62_221.2542m/z	27.8818	105.432	66.657	179.549	84.0083	131.779	32.3748	42.789	37.5819	1.97697	0.56381
AHI#3.73_350.0905m/z	1191.41	1288.64	1240.02	2415.12	2486.8	2450.96	1943.93	1793.15	1868.54	1.97654	1.50685
RPP#7.18_271.4600m/z	13.939	12.7324	13.3357	28.8443	23.8678	26.356	13.7644	15.3128	14.5386	1.97635	1.0902
ZHI#3.73_148.0625m/z	6600.6	7029.02	6814.81	13365.3	13564.4	13464.9	2679.06	2627.66	2653.36	1.97583	0.389352
RPP#1.26_203.5405m/z	226.24	252.55	239.395	428.926	517.015	472.97	189.378	199.112	194.245	1.97569	0.8114
AHI#5.77_628.8843m/z	58.0031	35.0161	46.5096	82.2335	101.499	91.8663	103.435	115.932	109.684	1.97521	2.3583
AHI#2.43_840.0091m/z	222.416	276.017	249.217	438.817	545.303	492.06	236.019	284.74	260.379	1.97443	1.04479
AHI#6.77_582.9164m/z	47.014	35.6135	41.3137	96.8283	66.3002	81.5642	86.0575	67.3815	76.7195	1.97426	1.857
AHI#4.73_964.1993m/z	232.763	190.023	211.393	356.171	477.856	417.013	150.839	142.13	146.485	1.97269	0.692949
RPP#1.82_129.0395m/z	11.8821	7.08406	9.48308	14.9041	22.4979	18.701	33.1605	23.6484	28.4044	1.97204	2.99528
RPP#13.25_270.9776m/z	16.9415	14.7612	15.8513	20.9531	41.5557	31.2544	17.0458	18.7774	17.9116	1.97172	1.12997
AHI#5.96_476.5637m/z	179.653	143.236	161.444	332.362	304.094	318.228	342.937	309.856	326.397	1.97113	2.02173
RPP#8.45_156.9448m/z	2.19856	10.7984	6.49847	14.4136	11.2019	12.8077	17.2235	13.9194	15.5715	1.97088	2.39617
ZHI#7.76_191.9797n	86.9384	121.227	104.083	170.129	240.09	205.109	203.246	222.668	212.957	1.97063	2.04603
AHI#12.77_364.8494m/z	26.0238	17.3079	21.6658	38.6929	46.6648	42.6788	30.0621	65.6159	47.839	1.96987	2.20804
AHI#1.01_481.2975m/z	265.463	358.252	311.857	569.707	658.557	614.132	417.05	586.104	501.577	1.96927	1.60835
AHI#4.68_322.0938m/z	118.737	108.458	113.597	186.967	260.33	223.648	166.749	240.74	203.744	1.96878	1.79357
AHI#1.36_346.9013m/z	431.335	220.019	325.677	581.971	700.342	641.157	310.989	303.57	307.28	1.96869	0.943511
ZHI#9.12_281.1027m/z	81.773	43.3397	62.5564	136.441	109.808	123.124	99.3357	84.8363	92.086	1.96821	1.47205
AHI#3.07_912.7516m/z	4303.88	4282.37	4293.13	8443.07	8454.21	8448.64	5012.16	5185.63	5098.9	1.96794	1.18769
AHI#3.54_191.1788m/z	9.6634	2.73394	6.19867	15.1424	9.24749	12.195	34.5193	21.0318	27.7755	1.96735	4.48089
ZHI#3.88_224.0248n	3628.31	3681.19	3654.75	7031.41	7348.25	7189.83	5267.63	4818.4	5043.01	1.96726	1.37985
AHI#2.34_387.3127m/z	140.29	190.059	165.174	352.664	297.022	324.843	300.632	203.703	252.168	1.96666	1.52667
AHI#8.39_810.4653m/z	175.724	184.16	179.942	368.496	339.206	353.851	163.897	183.996	173.947	1.96647	0.96668
RPP#12.80_632.2949m/z	53.1552	42.3431	47.7491	105.173	82.5907	93.8816	64.8357	92.1453	78.4905	1.96614	1.64381
RPP#1.38_246.9788m/z	258.054	258.402	258.228	495.418	519.821	507.62	208.732	211.441	210.087	1.96578	0.813571
ZHI#3.96_203.1155n	66125.3	64698.5	65411.9	127032	130048	128540	131698	133759	132729	1.96509	2.02912
AHI#11.14_467.5577m/z	42.9924	53.8317	48.4121	84.8959	105.311	95.1036	55.8106	40.5488	48.1797	1.96446	0.9952
RPP#6.53_726.3419m/z	68.1789	53.0386	60.6087	134.438	103.611	119.024	47.2146	78.1934	62.704	1.96382	1.03457
ZHI#4.88_157.2971m/z	1.77531	1.20837	1.49184	3.52685	2.33125	2.92905	2972.26	2981.44	2976.85	1.96338	1995.42
AHI#8.67_510.7228m/z	42.9981	22.2346	32.6163	48.3066	79.7275	64.0171	18.3219	26.3641	22.343	1.96273	0.685025
AHI#8.19_280.0692m/z	113.978	119.977	116.978	238.846	220.32	229.583	71.9937	80.459	76.2263	1.96262	0.65163
AHI#6.04_554.3484m/z	41.3614	74.4581	57.9098	85.7276	141.213	113.47	164.522	156.129	160.326	1.95943	2.76854
AHI#8.84_548.8219m/z	34.7459	30.9157	32.8308	95.6928	32.9015	64.2971	53.4307	33.8533	43.642	1.95844	1.3293
AHI#2.76_314.0207n	128.407	115.029	121.718	235.598	240.948	238.273	173.769	250.511	212.14	1.95758	1.74288
RPP#3.12_513.3148m/z	21.3307	31.4417	26.3862	42.8074	60.4919	51.6497	38.7357	23.08	30.9079	1.95745	1.17136
AHI#2.91_143.0133m/z	47.6465	40.9247	44.2856	81.6202	91.7441	86.6822	59.63	46.3789	53.0045	1.95734	1.19688
AHI#2.53_490.4243m/z	71.2595	45.5216	58.3906	152.438	76.0681	114.253	65.2215	155.922	110.572	1.9567	1.89366
RPP#3.07_442.0908m/z	41.5561	0	20.778	39.8299	41.4728	40.6514	36.091	47.272	41.6815	1.95646	2.00604
ZHI#1.91_212.0926m/z	4479.63	4783.6	4631.62	8940.13	9181.58	9060.85	10855.4	11052.8	10954.1	1.95631	2.36508
RPP#10.57_787.4594m/z	18.0061	3.58004	10.7931	15.5702	26.656	21.1131	14.0733	15.4125	14.7429	1.95617	1.36596
RPP#12.12_395.7614m/z	67.3969	66.5714	66.9842	162.099	99.9028	131.001	132.895	41.939	87.4172	1.9557	1.30504
AHI#2.36_549.5211m/z	116.208	99.8864	108.047	212.271	210.16	211.216	201.311	147.665	174.488	1.95484	1.61492
RPP#7.67_203.0912m/z	4.34908	25.15	14.7495	21.6067	36.0592	28.833	28.0019	20.5115	24.2567	1.95484	1.64457
RPP#6.46_187.0552m/z	9.13126	13.1362	11.1338	19.622	23.9042	21.7631	19.2004	19.5466	19.3735	1.9547	1.74007
AHI#7.25_440.0266m/z	12.4532	16.1913	14.3222	31.524	24.4666	27.9953	336.716	318.986	327.851	1.95467	22.891
RPP#7.49_626.8686m/z	22.168	20.88	21.524	34.5367	49.5937	42.0652	23.9669	47.6231	35.795	1.95434	1.66303
ZHI#2.58_135.9450m/z	29.399	20.3274	24.8632	47.9514	49.1973	48.5744	50.2497	68.3235	59.2866	1.95366	2.38451
AHI#5.91_492.5379m/z	101.244	54.1609	77.7025	157.66	145.865	151.763	146.821	123.303	135.062	1.95313	1.73819
ZHI#8.76_271.1290m/z	769.437	844.602	807.02	1603.22	1548.79	1576	468.274	429.696	448.985	1.95287	0.556349
AHI#11.97_480.3311m/z	53.4283	37.1579	45.2931	77.8892	98.9896	88.4394	70.524	92.5663	81.5452	1.9526	1.80039
AHI#8.03_310.6505m/z	62.8141	75.8567	69.3354	143.759	126.847	135.303	74.9429	87.0604	81.0016	1.95143	1.16826
ZHI#0.93_697.2918m/z	26.7402	20.3451	23.5426	37.268	54.5924	45.9302	47.0361	38.2667	42.6514	1.95094	1.81167
AHI#1.25_285.6623m/z	88.4281	71.7499	80.089	148.705	163.571	156.138	145.181	127.262	136.221	1.94956	1.70088
ZHI#1.68_257.9639m/z	364.592	452.444	408.518	797.976	794.877	796.426	332.415	361.781	347.098	1.94955	0.849652
RPP#12.61_511.7278m/z	43.7205	10.2818	27.0012	61.8744	43.3997	52.637	30.0159	13.2337	21.6248	1.94943	0.800884
AHI#3.48_943.5967m/z	40.7452	53.555	47.1501	81.6049	102.196	91.9006	82.75	64.3302	73.5401	1.94911	1.5597
ZHI#7.04_311.0750m/z	72.6084	67.459	70.0337	126.68	146.176	136.428	53.391	40.9773	47.1842	1.94803	0.673735
RPP#8.34_303.0727m/z	8.77496	8.29639	8.53567	14.3284	18.9243	16.6264	24.6802	16.3315	20.5058	1.94787	2.40237
AHI#1.15_500.5758m/z	25.5653	116.102	70.8335	138.413	137.413	137.913	108.19	98.7093	103.45	1.947	1.46046
RPP#14.12_916.5286m/z	161.5	66.737	114.119	270.816	173.546	222.181	206.156	61.0031	133.579	1.94693	1.17053
AHI#2.67_547.5088m/z	203.042	177.089	190.066	404.515	335.521	370.018	353.25	254.096	303.673	1.94679	1.59773
ZHI#5.42_170.1184m/z	647.34	682.148	664.744	1405.88	1182.35	1294.12	390.817	424.511	407.664	1.94679	0.613265
RPP#10.21_858.1761m/z	31.4329	24.1736	27.8032	48.8815	59.3641	54.1228	41.5388	44.0465	42.7927	1.94664	1.53913
RPP#5.87_211.0119m/z	17.6947	20.2668	18.9808	36.8846	37.0116	36.9481	22.3563	32.6959	27.5261	1.94661	1.45021
ZHI#2.88_245.0355n	6876.25	6623.84	6750.04	13055.6	13210.4	13133	13922.5	14029.1	13975.8	1.94561	2.07048
ZHI#2.14_375.0307m/z	107.697	168.798	138.247	321.598	216.151	268.874	1030.57	851.936	941.251	1.94488	6.80846
RPP#6.00_388.6678m/z	29.9515	18.7962	24.3739	50.4327	44.363	47.3978	22.3349	54.675	38.505	1.94462	1.57976
AHI#3.48_271.0815m/z	361.123	376.397	368.76	848.999	584.514	716.756	568.751	529.289	549.02	1.94369	1.48883
AHI#4.61_621.1900m/z	227.58	287.755	257.667	506.389	494.029	500.209	363.088	224.631	293.859	1.9413	1.14046
RPP#4.95_915.4988m/z	14.2502	10.4484	12.3493	30.2985	17.6278	23.9631	12.4288	11.2223	11.8255	1.94045	0.957591
AHI#3.61_558.2904m/z	693.453	781.5	737.476	1524.19	1336.98	1430.59	1247.87	1065.44	1156.66	1.93984	1.5684
AHI#2.24_838.0169n	249.139	364.23	306.684	653.304	536.39	594.847	332.842	305.666	319.254	1.93961	1.04099
AHI#4.71_846.1625n	5858.39	6577.94	6218.16	10751	13369	12060	4668.61	5124.49	4896.55	1.93948	0.787459
RPP#13.55_552.4124m/z	68.15	10.6225	39.3863	124.668	27.996	76.3319	58.3341	36.0109	47.1725	1.93803	1.19769
ZHI#6.19_198.1133m/z	100.532	77.2116	88.872	191.705	152.75	172.228	32.3066	23.4712	27.8889	1.93793	0.31381
AHI#4.59_207.9981m/z	50.3962	44.3612	47.3787	93.1922	90.3795	91.7858	216.533	187.978	202.256	1.93728	4.26892
AHI#1.03_610.3643m/z	191.428	526.178	358.803	640.842	749.144	694.993	384.061	445.82	414.941	1.93698	1.15646
AHI#7.88_234.0851m/z	1395.75	1407.82	1401.79	2685.55	2744.88	2715.21	1331.53	1427.16	1379.35	1.93696	0.98399
RPP#14.09_466.7455m/z	16.1375	13.9986	15.0681	30.4161	27.942	29.179	39.1235	24.1537	31.6386	1.93648	2.09971
AHI#2.31_208.0269m/z	47.4668	50.5689	49.0178	105.063	84.7768	94.9199	71.0726	34.747	52.9098	1.93644	1.0794
AHI#1.01_415.7412n	93.9665	91.7638	92.8652	163.719	195.701	179.71	71.7877	113.856	92.822	1.93517	0.999535
ZHI#5.78_976.5455m/z	149.993	175.182	162.587	315.488	313.584	314.536	353.123	327.229	340.176	1.93457	2.09226
ZHI#5.53_495.1315m/z	298.565	341.312	319.939	531.41	706.248	618.829	178.472	361.897	270.185	1.93421	0.844488
AHI#2.98_547.2963m/z	4846.74	5481.35	5164.05	9983.54	9990.71	9987.13	5261.8	5492.89	5377.34	1.93397	1.0413
RPP#1.09_173.4498m/z	9.90123	5.55777	7.7295	9.48772	20.3995	14.9436	16.1147	26.5561	21.3354	1.93332	2.76025
AHI#3.12_248.1365n	12883.5	19116.5	16000	28222.6	33643.2	30932.9	11027	12732.9	11879.9	1.93331	0.742497
AHI#13.15_298.4931m/z	40.6062	40.5712	40.5887	79.4134	77.5264	78.4699	45.3695	39.3704	42.3699	1.93329	1.04388
ZHI#5.40_127.0021m/z	40.9404	37.7375	39.3389	73.9212	78.1771	76.0492	44.2602	45.0811	44.6707	1.93318	1.13553
RPP#4.01_207.0748m/z	24.7411	26.5443	25.6427	55.5687	43.5663	49.5675	36.6678	33.5113	35.0896	1.93301	1.3684
RPP#13.34_844.8535m/z	18.1704	32.2127	25.1916	25.8489	71.5296	48.6892	38.4076	24.0023	31.2049	1.93276	1.23871
AHI#10.59_346.6408m/z	17.8034	47.6998	32.7516	88.7131	37.8728	63.293	46.0872	52.7267	49.407	1.93252	1.50854
RPP#13.37_550.3865m/z	252.568	117.713	185.14	446.201	269.361	357.781	246.453	103.664	175.059	1.93248	0.945545
RPP#10.00_121.0395m/z	8.21457	5.49252	6.85355	9.96725	16.5141	13.2407	8.79257	7.61873	8.20565	1.93195	1.19729
RPP#12.10_131.1177m/z	5.16326	6.16056	5.66191	7.35963	14.5141	10.9369	18.6963	8.43207	13.5642	1.93165	2.39569
AHI#8.84_540.8093m/z	1629.19	1689.01	1659.1	3185.24	3222.85	3204.05	2027.86	2180.07	2103.96	1.9312	1.26814
ZHI#12.45_201.0377m/z	86.9709	119.514	103.243	208.586	190.053	199.319	130.234	103.607	116.92	1.93059	1.13248
RPP#6.90_452.7309m/z	11.3945	7.58022	9.48736	25.5228	11.1089	18.3158	11.3155	13.1091	12.2123	1.93055	1.28722
AHI#2.79_261.0372m/z	131.23	150.119	140.674	294.736	248.415	271.575	304.394	228.999	266.696	1.93053	1.89584
AHI#1.24_283.9994m/z	13.4624	59.827	36.6447	83.6737	57.8064	70.74	55.7376	41.0873	48.4124	1.93043	1.32113
RPP#11.74_698.9133m/z	21.8063	44.1588	32.9825	54.0941	73.2263	63.6602	48.1243	27.1426	37.6335	1.93012	1.14101
RPP#6.08_113.9403m/z	3.26218	1.32898	2.29558	2.4287	6.43182	4.43026	3.52386	6.51212	5.01799	1.92991	2.18594
AHI#7.58_734.9953m/z	167.954	164.47	166.212	331.005	310.535	320.77	194.374	163.956	179.165	1.92988	1.07793
AHI#5.37_144.0025m/z	49.5113	42.0062	45.7587	91.8268	84.7666	88.2967	74.0136	62.5361	68.2749	1.92961	1.49206
AHI#11.61_296.6910m/z	20.1936	32.395	26.2943	40.0834	61.3807	50.7321	34.1916	28.0049	31.0982	1.92939	1.1827
AHI#1.48_290.0302m/z	3.81389	7.95412	5.884	13.369	9.3321	11.3505	31.8263	11.6736	21.75	1.92905	3.69646
AHI#1.34_935.3019n	269.37	205.011	237.19	472.623	442.302	457.463	343.265	280.66	311.962	1.92867	1.31524
AHI#8.31_306.0957m/z	107.485	129.811	118.648	228.042	229.516	228.779	111.901	115.137	113.519	1.92821	0.956772
AHI#3.07_707.5590n	2725.65	2851.3	2788.47	5422.68	5329.37	5376.03	2736.3	2816.3	2776.3	1.92795	0.995636
AHI#5.01_276.9493m/z	102.072	95.0512	98.5614	191.665	188.067	189.866	190.459	183.09	186.774	1.92638	1.89501
ZHI#6.91_343.1247m/z	2531.43	2656.78	2594.1	5030.52	4960.76	4995.64	2325.84	2412.24	2369.04	1.92577	0.913239
RPP#9.27_438.9046m/z	7.37482	22.5889	14.9818	33.4442	24.2499	28.8471	29.1245	31.0247	30.0746	1.92547	2.0074
AHI#2.19_510.5235m/z	522.306	413.466	467.886	881.522	920.163	900.842	740.4	653.323	696.862	1.92535	1.48938
RPP#12.96_791.9759m/z	23.3323	36.2354	29.7839	29.7371	84.9329	57.335	66.8596	86.1182	76.4889	1.92504	2.56813
RPP#6.31_504.4932m/z	47.1993	35.5737	41.3865	82.3454	76.964	79.6547	72.4675	67.7189	70.0932	1.92465	1.69362
AHI#3.24_304.1655n	5860.75	5609.31	5735.03	10290.3	11782.3	11036.3	3933.32	4895.53	4414.43	1.92436	0.76973
ZHI#5.76_500.1988m/z	2898.35	3794.09	3346.22	6601.69	6275.33	6438.51	6755.65	7477.89	7116.77	1.92412	2.12681
ZHI#6.04_278.0743m/z	3159.83	3211.09	3185.46	6204.45	6053.39	6128.92	4130.3	3937.22	4033.76	1.92403	1.2663
ZHI#10.22_265.0922m/z	4.88126	17.1487	11.015	9.13702	33.2479	21.1925	179.861	185.984	182.922	1.92397	16.6067
AHI#4.57_291.9491m/z	55.704	56.1832	55.9436	117.182	98.0407	107.611	279.205	218.483	248.844	1.92357	4.44812
AHI#2.08_386.0456m/z	148.785	38.1289	93.457	152.75	206.766	179.758	98.318	159.906	129.112	1.92343	1.38151
ZHI#2.04_321.0525n	5726.15	5798.71	5762.43	11197.7	10959.2	11078.5	3108.09	3221.48	3164.79	1.92253	0.549211
ZHI#5.42_227.0214m/z	366.792	389.877	378.335	725.095	729.481	727.288	463.513	462.615	463.064	1.92234	1.22395
AHI#1.25_564.9490m/z	7047.11	6297.13	6672.12	12160.4	13487.2	12823.8	7044.56	7799.2	7421.88	1.922	1.11237
RPP#8.95_136.9821m/z	8.98862	4.58274	6.78568	11.4402	14.6373	13.0388	16.8284	4.51599	10.6722	1.92151	1.57275
AHI#1.77_218.1384m/z	3751.82	3706.13	3728.97	7142.56	7172.61	7157.59	4865.9	5187.48	5026.69	1.91945	1.34801
ZHI#4.14_383.3161m/z	12.9242	37.4213	25.1728	51.8161	44.7427	48.2794	72.4267	58.984	65.7054	1.91792	2.61018
AHI#3.54_338.0912m/z	540.312	632.448	586.38	1089.28	1159.51	1124.39	1216.24	1091.92	1154.08	1.91751	1.96815
AHI#10.63_515.1352m/z	12.8883	9.59013	11.2392	24.1918	18.9054	21.5486	94.2346	60.5865	77.4105	1.91727	6.88754
AHI#1.86_204.1228m/z	2319.69	2270.32	2295	4121.53	4673.94	4397.73	3170.4	3242.85	3206.62	1.91622	1.39722
RPP#1.04_327.0640m/z	61.183	128.075	94.6292	135.581	227.041	181.311	453.292	497.7	475.496	1.91602	5.02483
ZHI#3.24_314.1717m/z	4495.26	4310.7	4402.98	8086.86	8784.49	8435.68	3370.67	3182.1	3276.38	1.9159	0.744128
RPP#12.29_163.5852m/z	5.19743	10.8992	8.0483	13.9379	16.8946	15.4162	12.6475	10.6531	11.6503	1.91547	1.44755
AHI#1.98_334.9919m/z	147.897	60.7478	104.323	201.006	198.59	199.798	110.975	90.5057	100.74	1.91519	0.965661
RPP#8.29_157.0346m/z	6.54583	12.3374	9.44161	16.5082	19.6511	18.0796	5.88206	17.2111	11.5466	1.91489	1.22295
AHI#3.42_408.4946m/z	67.3712	53.0675	60.2193	139.777	90.8248	115.301	132.014	91.0783	111.546	1.91468	1.85233
AHI#3.09_725.5425n	501.191	503.965	502.578	977.279	947.124	962.202	345.656	318.214	331.935	1.91453	0.660465
AHI#3.23_337.2170n	1316.41	1094.13	1205.27	2180.55	2433.69	2307.12	1547.76	1528.88	1538.32	1.9142	1.27633
AHI#8.29_250.9114m/z	47.9686	47.5112	47.7399	88.1486	94.6028	91.3757	54.2225	57.8548	56.0387	1.91403	1.17383
RPP#6.41_414.3878m/z	37.3423	26.0619	31.7021	61.9588	59.3787	60.6688	43.3281	63.6779	53.503	1.91371	1.68768
ZHI#5.65_390.0960m/z	352.505	410.478	381.492	749.519	710.386	729.953	328.099	368.107	348.103	1.91342	0.912479
RPP#11.11_387.7695m/z	210.19	105.117	157.654	315.685	287.317	301.501	262.567	147.533	205.05	1.91243	1.30064
ZHI#4.83_396.9556m/z	13.2059	5.48254	9.34421	33.701	2.03829	17.8696	1901.68	1535.3	1718.49	1.91238	183.91
RPP#10.69_153.5830m/z	12.7429	10.4696	11.6062	23.1387	21.2472	22.1929	11.3466	19.895	15.6208	1.91215	1.3459
RPP#1.80_432.4838m/z	15.3323	13.4802	14.4062	29.2877	25.8024	27.545	55.0705	33.5767	44.3236	1.91202	3.0767
RPP#1.02_123.0037m/z	285.44	345.098	315.269	493.41	711.319	602.364	484.701	521.636	503.169	1.91063	1.596
AHI#9.07_550.8684m/z	90.0509	63.1069	76.5789	151.049	141.503	146.276	143.124	158.983	151.054	1.91013	1.97252
RPP#1.89_533.1037m/z	20.3438	28.8512	24.5975	31.7457	62.1798	46.9628	30.1751	17.684	23.9296	1.90925	0.972844
AHI#12.65_286.6398m/z	16.1267	18.1847	17.1557	27.3223	38.1731	32.7477	8.49598	29.8462	19.1711	1.90885	1.11747
RPP#8.97_1003.1209m/z	11.8564	10.5502	11.2033	30.6557	12.1118	21.3838	14.82	12.2993	13.5596	1.9087	1.21032
RPP#2.60_259.0395m/z	28.7265	25.1728	26.9497	47.4352	55.4376	51.4364	28.0199	11.6662	19.8431	1.90861	0.736301
AHI#4.94_468.1485m/z	176.606	224.684	200.645	332.991	432.865	382.928	236.146	138.314	187.23	1.90848	0.933138
ZHI#5.04_494.1737m/z	1499.73	1580.63	1540.18	2916.99	2959.65	2938.32	1105.83	921.42	1013.62	1.90778	0.65812
AHI#8.19_727.3893m/z	252.011	238.911	245.461	476.75	459.367	468.058	293.158	333.032	313.095	1.90685	1.27554
RPP#7.93_242.9225m/z	3.92104	7.79083	5.85593	8.65553	13.6771	11.1663	14.9113	11.6665	13.2889	1.90684	2.26931
AHI#2.39_276.0529m/z	70.6838	11.4377	41.0608	80.8341	75.7408	78.2875	82.7475	76.8777	79.8126	1.90662	1.94377
AHI#7.79_410.7210m/z	82.1644	78.3802	80.2723	152.95	153.002	152.976	71.6902	78.5492	75.1197	1.90571	0.935811
RPP#1.14_169.4817m/z	23.579	9.37678	16.4779	25.9607	36.8327	31.3967	67.9357	75.6701	71.8029	1.90538	4.35753
AHI#5.96_484.5506m/z	138.274	122.791	130.532	227.201	270.197	248.699	254.778	248.822	251.8	1.90527	1.92902
RPP#8.08_175.3226m/z	0.584485	6.58233	3.58341	7.61313	6.03165	6.82239	5.7939	8.2377	7.0158	1.90388	1.95786
ZHI#4.68_303.1558m/z	8346.23	8355.24	8350.74	16132.2	15656	15894.1	7829.89	8343.92	8086.91	1.90331	0.968407
ZHI#7.01_168.0299m/z	29.3254	42.4411	35.8832	75.4569	61.1124	68.2847	56.7691	56.4694	56.6193	1.90297	1.57787
AHI#3.90_339.0302m/z	48.2669	41.4473	44.8571	101.95	68.7638	85.357	101.58	49.8779	75.729	1.90287	1.68823
RPP#13.72_524.7339m/z	63.5152	31.2086	47.3619	95.8399	84.399	90.1195	75.6966	17.9523	46.8244	1.90278	0.988652
RPP#1.44_827.9478m/z	37.2759	21.2747	29.2753	51.2384	60.1581	55.6983	27.0252	14.4891	20.7572	1.90257	0.709033
RPP#9.44_299.5858m/z	14.4157	9.25291	11.8343	25.633	19.398	22.5155	24.0355	20.588	22.3117	1.90256	1.88535
AHI#3.09_666.8584n	108.636	169.158	138.897	294.368	233.916	264.142	142.889	179.181	161.035	1.90171	1.15938
AHI#6.80_204.1236m/z	150.205	170.971	160.588	257.728	352.877	305.303	71.2315	114.523	92.8774	1.90116	0.578358
ZHI#8.02_641.4239m/z	46.2455	74.8794	60.5625	125.31	104.898	115.104	121.34	125.235	123.288	1.90058	2.03571
RPP#3.73_481.9656m/z	56.1986	62.1474	59.173	112.303	112.582	112.442	114.249	109.269	111.759	1.90023	1.88869
RPP#14.97_729.0570m/z	801.223	132.85	467.037	1117.37	657.389	887.38	1149.31	275.052	712.183	1.90002	1.5249
RPP#13.08_411.0926m/z	4.70979	17.7632	11.2365	19.9747	22.7001	21.3374	32.2515	26.4547	29.3531	1.89894	2.6123
AHI#2.62_413.1044m/z	63.0853	187.485	125.285	271.869	203.936	237.902	96.39	68.4884	82.4392	1.89888	0.658011
RPP#1.17_166.6099m/z	110.433	99.5772	105.005	206.534	192.186	199.36	87.8658	104.481	96.1733	1.89858	0.915893
AHI#10.11_459.3241m/z	32.7007	32.0871	32.3939	84.3334	38.6513	61.4923	48.6832	35.7503	42.2168	1.89827	1.30323
RPP#14.82_182.1159m/z	6.58504	5.64299	6.11401	10.5557	12.6562	11.606	3.49828	10.995	7.24665	1.89826	1.18525
AHI#3.17_136.0217m/z	1008.25	585.143	796.696	1606.88	1415.96	1511.42	2446.51	1343.17	1894.84	1.89711	2.37837
AHI#1.84_178.1223m/z	250.701	262.032	256.367	500.56	472.15	486.355	150.65	184.488	167.569	1.89711	0.65363
RPP#1.24_123.0318n	4214.91	4327.58	4271.25	8007.91	8195.17	8101.54	9450.7	9481.71	9466.2	1.89676	2.21626
ZHI#6.68_114.0237m/z	158.089	138.642	148.365	274.39	288.425	281.407	218.182	266.116	242.149	1.89672	1.63211
ZHI#1.75_356.9775m/z	57.1019	78.7655	67.9337	124.831	132.652	128.741	112.63	147.26	129.945	1.8951	1.91282
AHI#1.20_432.6064m/z	1825.85	1691.29	1758.57	3401.73	3263.55	3332.64	1853.87	1593.35	1723.61	1.89508	0.980119
AHI#2.14_192.1748n	1268.11	1234.12	1251.12	2544.07	2197.82	2370.94	2026.61	1872.51	1949.56	1.89506	1.55826
AHI#2.26_842.0266m/z	135.559	256.317	195.938	382.726	359.735	371.231	182.846	253.838	218.342	1.89463	1.11434
RPP#12.78_514.7113m/z	33.3055	16.2833	24.7944	60.8826	33.0692	46.9759	34.0165	11.9222	22.9693	1.89462	0.926393
AHI#2.48_330.3003m/z	95.6297	110.949	103.289	130.073	261.287	195.68	150.921	144.29	147.605	1.89449	1.42905
ZHI#6.53_593.1364m/z	145.675	115.18	130.427	262.599	231.407	247.003	218.31	145.301	181.805	1.8938	1.39392
AHI#2.91_191.1794m/z	16.2176	11.0146	13.6161	23.279	28.2803	25.7797	35.1936	23.5893	29.3914	1.89333	2.15859
AHI#4.49_314.1030m/z	275.619	426.547	351.083	573.256	755.829	664.542	456.369	196.103	326.236	1.89284	0.929228
AHI#2.69_265.2155m/z	28.4137	23.0575	25.7356	48.9936	48.422	48.7078	45.5277	56.1111	50.8194	1.89263	1.97467
ZHI#8.66_442.2745m/z	44.6304	13.3443	28.9874	55.3637	54.3367	54.8502	40.032	42.8179	41.425	1.89221	1.42907
AHI#3.55_120.0653m/z	342.127	329.805	335.966	633.258	637.687	635.473	816.521	691.951	754.236	1.89148	2.24498
AHI#4.94_157.0473m/z	820.386	873.702	847.044	1655.81	1548.37	1602.09	1200.85	1004.26	1102.56	1.89139	1.30165
AHI#3.21_360.1583m/z	4000.23	3595.24	3797.73	6381.23	7984.67	7182.95	3797.82	3855.67	3826.75	1.89138	1.00764
AHI#2.65_342.0618m/z	1016.07	1146	1081.03	2132.6	1956.56	2044.58	900.26	889.572	894.916	1.89132	0.827834
ZHI#5.01_110.9752m/z	353.717	358.436	356.077	701.557	645.313	673.435	237.722	218.583	228.152	1.89126	0.640739
AHI#1.22_259.9577n	5390.75	4109.94	4750.34	8235.72	9732.43	8984.08	4435.05	5408.04	4921.54	1.89125	1.03604
ZHI#7.14_592.1367m/z	43.2847	29.2795	36.2821	69.2367	67.9936	68.6152	103.565	35.6925	69.6287	1.89116	1.91909
ZHI#9.04_384.9839m/z	18.1955	53.319	35.7572	67.3276	67.8956	67.6116	101.601	100.105	100.853	1.89085	2.82049
AHI#16.54_156.5926m/z	12.2988	17.1573	14.7281	31.3291	24.3619	27.8455	10.1536	11.0876	10.6206	1.89064	0.721111
AHI#4.14_350.2070m/z	291.265	257.824	274.545	538.913	499.097	519.005	158.188	216.581	187.384	1.89042	0.682528
RPP#3.99_210.5442m/z	37.6482	43.7758	40.712	68.4474	85.4329	76.9402	13.7492	27.8035	20.7763	1.88986	0.510324
AHI#10.24_247.9649m/z	12.0426	9.18169	10.6121	22.4774	17.6279	20.0527	0.609469	1.80914	1.20931	1.8896	0.113955
RPP#5.75_792.2098m/z	20.9077	21.5108	21.2093	40.1654	39.9783	40.0718	39.8562	26.0134	32.9348	1.88935	1.55285
AHI#3.29_610.0227m/z	62.9223	55.873	59.3976	99.1087	125.285	112.197	104.719	128.528	116.624	1.88891	1.96344
RPP#10.47_187.0564m/z	10.6011	0.303317	5.45222	7.65257	12.9407	10.2966	2.25878	5.61806	3.93842	1.88852	0.722351
RPP#14.97_871.4672n	4334.62	1317.75	2826.18	7650.83	3021.2	5336.02	4008.12	1645.96	2827.04	1.88806	1.0003
AHI#8.72_466.1158m/z	7.19749	12.1678	9.68264	21.4519	15.107	18.2795	15.7285	14.6792	15.2038	1.88786	1.57021
AHI#2.83_381.0101n	640.594	599.674	620.134	1141.84	1199.21	1170.52	748.547	732.585	740.566	1.88753	1.1942
AHI#8.19_975.6443m/z	24.4113	5.2739	14.8426	41.2043	14.8152	28.0098	51.754	15.6831	33.7186	1.88712	2.27174
AHI#3.17_798.2634m/z	300.777	280.205	290.491	432.332	663.976	548.154	537.378	453.581	495.48	1.88699	1.70566
AHI#10.04_582.7240m/z	44.5464	87.2083	65.8774	82.766	165.781	124.274	50.1187	47.1286	48.6236	1.88644	0.738093
RPP#14.97_735.5775n	916846	236527	576686	1.289e+06	886706	1.08785e+06	1.05018e+06	444715	747449	1.88639	1.29611
AHI#2.91_318.0963m/z	228.376	191.982	210.179	388.342	404.591	396.467	186.381	192.748	189.565	1.88633	0.90192
ZHI#10.68_434.2158m/z	34.6365	25.7487	30.1926	57.3031	56.5818	56.9424	43.1972	53.843	48.5201	1.88597	1.60702
RPP#1.05_530.3400m/z	33.0504	29.2442	31.1473	58.4336	59.047	58.7403	30.9992	27.9119	29.4556	1.88589	0.945686
AHI#2.31_235.9384n	3.34349	6.44758	4.89554	6.40609	12.0587	9.23241	145.075	143.196	144.135	1.88588	29.4422
AHI#5.94_152.3372m/z	420.656	447.229	433.942	829.03	807.532	818.281	584.756	708.354	646.555	1.88569	1.48996
AHI#2.64_793.6268m/z	198.35	161.791	180.07	335.26	343.747	339.503	262.674	236.699	249.686	1.88539	1.3866
AHI#4.88_337.0770m/z	443.351	580.982	512.166	981.936	948.036	964.986	835.72	735.906	785.813	1.88413	1.53429
AHI#3.07_941.7563n	4796.22	4784.05	4790.14	9230.99	8816.35	9023.67	6259.03	6190.66	6224.85	1.8838	1.29951
RPP#12.00_1030.5983m/z	20.9289	11.7707	16.3498	20.5011	41.0964	30.7987	17.1418	28.3714	22.7566	1.88374	1.39186
RPP#14.84_916.5283m/z	540.18	143.488	341.834	818.29	469.116	643.703	670.625	230.805	450.715	1.88309	1.31852
ZHI#2.01_141.0189m/z	5385.83	5404.18	5395.01	10057.6	10255.7	10156.7	3598.17	3437.18	3517.68	1.88261	0.652025
RPP#1.47_242.1134m/z	2524.49	2509.2	2516.84	4603.7	4871.12	4737.41	1290.69	1321.41	1306.05	1.88228	0.518923
AHI#2.31_837.9976m/z	113.257	110.912	112.085	238.129	183.786	210.958	170.658	132.486	151.572	1.88213	1.3523
AHI#4.14_387.1165m/z	358.131	414.445	386.288	607.814	846.018	726.916	562.076	488.11	525.093	1.8818	1.35933
AHI#5.32_442.0185n	214.883	273.022	243.953	466.53	451.549	459.039	265.717	264.851	265.284	1.88168	1.08744
RPP#11.02_191.9572m/z	9.74904	16.793	13.271	23.3282	26.5781	24.9532	29.5379	36.6746	33.1063	1.88028	2.49463
ZHI#7.84_534.8773m/z	200.61	286.547	243.578	456.667	459.16	457.914	391.384	529.557	460.471	1.87994	1.89044
ZHI#9.22_405.9329m/z	85.4076	34.6214	60.0145	122.593	103.043	112.818	59.2653	85.9388	72.6021	1.87984	1.20974
AHI#8.38_552.9632m/z	42.8514	32.7395	37.7954	69.1501	72.9406	71.0453	54.7092	31.9398	43.3245	1.87973	1.14629
ZHI#8.73_581.3916m/z	44.8308	60.3436	52.5872	97.2408	100.448	98.8445	100.237	149.728	124.982	1.87963	2.37667
ZHI#6.68_234.0416m/z	40.763	39.9217	40.3424	76.1512	75.4957	75.8235	36.0099	50.0048	43.0073	1.8795	1.06606
RPP#13.03_321.6947m/z	11.0755	7.76143	9.41848	12.1539	23.2286	17.6912	18.9956	22.6403	20.818	1.87835	2.21033
AHI#4.94_396.2225m/z	6.45897	43.0218	24.7404	45.8229	47.1037	46.4633	19.2568	51.0293	35.143	1.87804	1.42047
ZHI#5.71_176.9779m/z	58.5255	58.2126	58.369	130.951	88.2602	109.606	62.6938	79.79	71.2419	1.87781	1.22054
AHI#5.70_448.0073m/z	15.5628	32.0141	23.7885	49.473	39.8609	44.6669	76.094	99.7044	87.8992	1.87767	3.69503
AHI#2.74_395.0530m/z	12.9108	10.0883	11.4995	35.028	8.15157	21.5898	65.4459	38.4475	51.9467	1.87745	4.51729
AHI#3.55_308.0411m/z	169.306	151.932	160.619	307.877	295.185	301.531	317.279	270.558	293.918	1.8773	1.82991
AHI#8.41_540.9798m/z	38.7442	53.8225	46.2833	78.4663	95.2874	86.8769	53.2517	80.8843	67.068	1.87707	1.44907
AHI#8.88_520.6864m/z	6081.96	6296.31	6189.14	11703.5	11522.1	11612.8	7070.12	7230.82	7150.47	1.87632	1.15533
AHI#3.81_901.3005m/z	46.3788	11.5107	28.9448	54.2743	54.3384	54.3064	68.357	21.0374	44.6972	1.87621	1.54422
ZHI#9.71_383.1977m/z	228.673	173.375	201.024	388.825	365.404	377.115	202.646	223.942	213.294	1.87597	1.06104
AHI#12.44_129.9796m/z	6.19183	7.49302	6.84242	12.3708	13.3015	12.8361	12.2076	17.1028	14.6552	1.87597	2.14182
RPP#12.69_373.2495m/z	27.8343	18.7174	23.2759	45.5041	41.8099	43.657	32.1069	42.7886	37.4477	1.87563	1.60887
RPP#2.04_213.1469m/z	15.8711	26.2566	21.0639	41.9704	37.0063	39.4884	14.7604	12.1212	13.4408	1.8747	0.638099
RPP#10.31_206.6434m/z	15.1828	12.8359	14.0094	33.1455	19.3631	26.2543	19.8474	9.05712	14.4522	1.87405	1.03161
AHI#2.98_254.1383m/z	6671.53	7325.12	6998.33	12772.7	13456.2	13114.5	4890.7	5126.95	5008.83	1.87395	0.715718
ZHI#7.14_123.0560m/z	42.5228	60.0586	51.2907	104.203	88.0022	96.1027	63.047	79.8775	71.4623	1.87369	1.39328
AHI#8.81_286.9515m/z	400.528	377.509	389.018	743.228	714.565	728.896	459.602	460.29	459.946	1.87368	1.18233
AHI#3.67_438.0181m/z	95.6949	49.0851	72.39	114.892	156.202	135.547	87.43	99.9108	93.6704	1.87246	1.29397
AHI#3.07_784.9599n	431.278	533.98	482.629	968.998	838.23	903.614	751.037	937.912	844.475	1.87228	1.74974
AHI#3.07_925.7231n	6555.35	6332.14	6443.75	12073.5	12055.2	12064.4	8332.93	8466.47	8399.7	1.87226	1.30354
RPP#3.31_157.5628m/z	41.1738	17.1074	29.1406	73.8032	35.3032	54.5532	27.4018	24.0384	25.7201	1.87207	0.882622
AHI#3.52_489.1964m/z	965.327	1019.76	992.545	2254.68	1459.9	1857.29	1346.19	1118.56	1232.37	1.87124	1.24163
AHI#9.59_135.0026m/z	286.671	287.295	286.983	508.638	565.187	536.913	377.57	348.187	362.879	1.87089	1.26446
AHI#8.39_866.8976m/z	116.374	92.363	104.368	171.089	219.309	195.199	113.718	144.988	129.353	1.87029	1.23939
ZHI#7.40_122.0606m/z	11.4404	5.4674	8.45392	15.4239	16.1854	15.8046	65.993	62.2597	64.1263	1.8695	7.5854
AHI#11.78_217.1544m/z	409.817	381.754	395.785	711.194	768.639	739.917	506.976	516.377	511.676	1.86949	1.29281
RPP#8.43_1042.6078m/z	29.141	23.6097	26.3753	57.3801	41.2334	49.3067	27.021	39.4896	33.2553	1.86943	1.26085
AHI#4.94_161.8995n	650.108	579.461	614.784	1235.87	1062.02	1148.95	1142.75	1040.63	1091.69	1.86886	1.77573
AHI#5.59_159.9769m/z	22.8791	17.7839	20.3315	39.2533	36.7247	37.989	96.0169	93.1907	94.6038	1.86848	4.65307
AHI#3.24_282.1436m/z	445.439	466.157	455.798	834.578	868.706	851.642	571.603	534.748	553.175	1.86846	1.21364
AHI#10.30_568.0156m/z	54.3846	32.4906	43.4376	93.3538	68.9055	81.1297	33.4394	27.9629	30.7012	1.86773	0.706788
ZHI#5.73_480.2829m/z	2319.44	2467.72	2393.58	4501.51	4439.5	4470.51	3044.6	3081.76	3063.18	1.86771	1.27975
AHI#3.42_158.0809m/z	3237.88	3119.71	3178.8	5895.11	5974.48	5934.8	6546.36	6256.49	6401.43	1.867	2.01379
AHI#2.41_149.0955m/z	36.6622	32.6151	34.6386	59.4199	69.8986	64.6593	48.3123	20.301	34.3066	1.86668	0.990416
AHI#3.74_442.9308m/z	15.0377	33.3045	24.1711	45.6823	44.5442	45.1132	52.6351	7.87085	30.253	1.86641	1.25162
ZHI#1.88_260.0925m/z	11299.8	11055	11177.4	20708.2	21001.8	20855	28866.2	28524.9	28695.6	1.86582	2.56729
RPP#13.27_187.0572m/z	2.88202	6.37999	4.631	9.19605	8.0848	8.64043	5.27968	8.14751	6.71359	1.86578	1.44971
RPP#8.10_305.5856m/z	15.4991	9.0731	12.2861	23.5898	22.2215	22.9057	9.78085	17.4277	13.6043	1.86436	1.10729
AHI#1.20_727.4477n	1446.46	1788.1	1617.28	2860	3170.05	3015.03	1450	1621.99	1536	1.86426	0.949744
RPP#3.92_130.1225m/z	5.42784	10.8949	8.16136	15.1218	15.3015	15.2117	5.87399	5.64897	5.76148	1.86387	0.705945
AHI#10.31_354.2430m/z	18.3181	40.8197	29.5689	55.6813	54.5204	55.1009	100.271	131.354	115.812	1.86347	3.91669
AHI#13.24_305.8212m/z	35.1362	54.375	44.7556	83.8005	82.9883	83.3944	38.6195	68.3331	53.4763	1.86333	1.19485
RPP#6.66_298.2119m/z	1.33933	11.8298	6.58457	6.81104	17.7262	12.2686	16.3456	14.8214	15.5835	1.86324	2.36667
RPP#14.80_964.4411m/z	57.3736	24.7137	41.0437	109.437	43.4918	76.4643	127.954	39.6688	83.8114	1.863	2.042
RPP#8.19_871.1951m/z	16.7819	12.2992	14.5406	26.903	27.2607	27.0819	23.6331	23.5062	23.5696	1.8625	1.62095
ZHI#4.81_373.0456n	439.732	381.004	410.368	797.226	731.39	764.308	2084.73	1946.93	2015.83	1.86249	4.91225
ZHI#6.50_651.2156n	603.577	519.432	561.504	1076.9	1014.09	1045.5	677.973	577.28	627.626	1.86196	1.11776
RPP#1.80_193.0016m/z	1918.46	1979.4	1948.93	3495.17	3762.03	3628.6	3089.66	3144.52	3117.09	1.86184	1.59939
AHI#11.14_560.0603m/z	114.86	96.5446	105.703	233.625	159.933	196.779	104.651	60.8406	82.7459	1.86163	0.782819
RPP#9.82_284.4576m/z	4.46556	4.4165	4.44103	9.73426	6.79706	8.26566	4.90373	5.25382	5.07877	1.8612	1.1436
AHI#10.37_518.4399m/z	66.825	70.7878	68.8064	127.634	128.444	128.039	211.224	199.342	205.283	1.86086	2.98348
ZHI#1.70_291.0514m/z	519.932	598.873	559.402	972.081	1109.84	1040.96	145.998	85.7816	115.89	1.86085	0.207167
RPP#1.52_130.5344m/z	149.558	145.99	147.774	265.729	284.23	274.98	174.812	162.763	168.788	1.86081	1.1422
RPP#5.54_790.2230m/z	25.6548	31.0076	28.3312	48.7528	56.6587	52.7058	54.497	69.2267	61.8619	1.86034	2.18352
AHI#2.64_291.0975m/z	88.9253	148.065	118.495	258.197	182.638	220.418	139.026	114.441	126.734	1.86015	1.06953
AHI#2.88_300.7882m/z	38.42	34.2306	36.3253	80.7862	54.251	67.5186	51.9744	28.5069	40.2407	1.85872	1.10779
RPP#7.11_262.9187m/z	6.52538	6.75317	6.63927	2.40589	22.2705	12.3382	12.4012	8.17734	10.2893	1.85836	1.54976
RPP#9.56_228.2013m/z	9.13458	14.0512	11.5929	25.2984	17.7856	21.542	17.7053	5.91258	11.8089	1.85821	1.01864
AHI#6.16_303.0859m/z	60.1451	24.8506	42.4978	99.1598	58.771	78.9654	55.2402	23.185	39.2126	1.8581	0.922696
AHI#1.38_534.0286m/z	93.6259	80.6076	87.1168	194.887	128.787	161.837	95.8196	89.2139	92.5167	1.8577	1.06199
RPP#1.64_169.9896m/z	3378.4	3485.7	3432.05	6179.16	6571.22	6375.19	4064.73	4049.37	4057.05	1.85755	1.18211
AHI#3.07_898.7359m/z	2972.56	2698.39	2835.47	5406.86	5124.43	5265.65	3814.67	3696.27	3755.47	1.85706	1.32446
AHI#1.51_341.8887m/z	4.70472	19.9607	12.3327	26.0564	19.7432	22.8998	16.2789	22.9843	19.6316	1.85684	1.59183
AHI#2.10_235.9385n	32.7619	24.4804	28.6211	46.8511	59.4313	53.1412	670.349	658.629	664.489	1.85671	23.2167
RPP#1.24_417.0209m/z	45.8105	73.0725	59.4415	117.588	103.14	110.364	29.8382	43.0786	36.4584	1.85668	0.613349
AHI#2.00_505.0135m/z	17.469	4.84729	11.1582	4.93767	36.4917	20.7147	155.55	158.251	156.9	1.85646	14.0615
AHI#1.76_730.4344m/z	2107.37	2311.33	2209.35	3858.54	4343.48	4101.01	920.708	1186.16	1053.43	1.85621	0.476808
AHI#3.07_953.7540n	6407.43	6123.04	6265.23	11856.4	11391	11623.7	8703.46	8700.78	8702.12	1.85527	1.38895
AHI#3.00_363.2522m/z	48.9688	26.9315	37.9502	90.8453	49.9036	70.3744	107.016	108.62	107.818	1.85439	2.84104
RPP#3.07_318.2018m/z	348.717	348.602	348.659	555.204	737.007	646.106	11.7485	3.8506	7.79957	1.85311	0.0223702
AHI#1.22_476.8486m/z	3857.82	2879.51	3368.67	5546.81	6929.99	6238.4	3281.27	3505.85	3393.56	1.85189	1.00739
ZHI#8.43_229.0122m/z	272.575	309.412	290.993	514.981	562.657	538.819	760.908	785.578	773.243	1.85166	2.65726
ZHI#6.99_864.8908m/z	61.525	30.052	45.7885	78.4775	91.0374	84.7574	73.7004	65.1077	69.404	1.85106	1.51575
AHI#3.78_163.0751m/z	60.131	39.0242	49.5776	123.311	60.1771	91.7441	85.7688	62.437	74.1029	1.85051	1.49468
AHI#7.56_726.4179m/z	216.75	190.449	203.6	341.412	412.043	376.728	211.415	137.758	174.587	1.85034	0.8575
RPP#11.63_973.0968m/z	9.93395	5.16636	7.55015	11.1438	16.7932	13.9685	12.5732	27.5064	20.0398	1.85009	2.65423
RPP#10.24_843.5214m/z	15.0193	5.82525	10.4223	17.3685	21.1808	19.2747	11.5659	2.03457	6.80023	1.84937	0.65247
RPP#1.02_148.0471m/z	177.195	249.729	213.462	227.141	562.264	394.703	337.136	435.579	386.357	1.84905	1.80996
AHI#10.71_688.6077m/z	52.5283	30.0897	41.309	43.2586	109.441	76.35	56.7353	28.3752	42.5552	1.84827	1.03017
RPP#1.19_345.2493m/z	136.136	147.354	141.745	244.563	279.358	261.96	97.1241	130.894	114.009	1.84811	0.804326
AHI#2.48_735.7064m/z	102.672	132.022	117.347	207.873	225.864	216.868	128.75	173.855	151.303	1.84809	1.28936
RPP#13.93_386.7571m/z	271.989	80.1015	176.045	408.158	242.449	325.304	301.256	137.872	219.564	1.84784	1.2472
AHI#2.01_258.2073m/z	32.3914	46.8835	39.6374	103.049	43.4081	73.2287	33.4535	30.9322	32.1928	1.84746	0.812182
RPP#7.04_268.5175m/z	12.2747	13.0148	12.6448	31.5344	15.1553	23.3449	22.3243	18.5204	20.4224	1.84621	1.61509
AHI#8.38_818.9766m/z	57.6607	53.1575	55.4091	95.588	108.955	102.272	35.6015	57.7516	46.6765	1.84576	0.842398
AHI#14.12_382.5150m/z	8.78182	5.79504	7.28843	17.1143	9.7847	13.4495	13.8419	10.9596	12.4008	1.84532	1.70143
RPP#1.02_408.9554m/z	132.52	122.754	127.637	230.159	240.9	235.529	144.777	117.333	131.055	1.8453	1.02678
AHI#2.76_786.7858m/z	110.639	77.0657	93.8526	187.372	158.957	173.164	90.5213	141.032	115.777	1.84507	1.2336
AHI#8.64_302.9261m/z	20.8428	17.7243	19.2836	33.9851	37.1534	35.5693	27.2632	22.9214	25.0923	1.84453	1.30123
AHI#2.22_354.9934m/z	322.781	400.145	361.463	620.912	712.387	666.65	504.517	552.21	528.364	1.84431	1.46174
ZHI#5.37_157.9914m/z	373.162	350.496	361.829	679.33	655.131	667.231	229.18	246.058	237.619	1.84405	0.656715
AHI#1.46_522.2182m/z	299.776	186.867	243.322	359.402	537.836	448.619	237.168	227.431	232.3	1.84373	0.954703
AHI#3.78_360.0080n	261.183	174.183	217.683	397.234	405.153	401.194	402.055	238.951	320.503	1.84302	1.47234
RPP#10.57_326.1516m/z	24.5935	12.5399	18.5667	23.2391	45.1814	34.2103	29.0216	26.7402	27.8809	1.84256	1.50166
RPP#13.13_493.3507m/z	130.282	53.7636	92.0227	188.13	150.715	169.422	155.178	79.9186	117.548	1.84109	1.27738
AHI#1.48_527.6838n	202.318	120.782	161.55	239.322	355.404	297.363	277.369	298.092	287.731	1.84068	1.78106
AHI#9.93_483.7541m/z	49.2738	51.8925	50.5832	114.572	71.6423	93.1072	62.3421	56.8631	59.6026	1.84068	1.17831
AHI#1.24_429.7969n	389.885	428.65	409.267	748.467	758.122	753.295	372.323	408.499	390.411	1.84059	0.953927
AHI#1.29_700.1783n	1545.63	1856.08	1700.86	3169.31	3091	3130.16	2342.6	2203.19	2272.89	1.84034	1.33632
AHI#9.35_939.4931m/z	143.604	120.415	132.01	244.979	240.855	242.917	153.297	180.63	166.964	1.84015	1.26478
RPP#2.04_209.1899m/z	5.90482	5.31124	5.60803	14.8719	5.76007	10.316	9.6504	0.929644	5.29002	1.8395	0.943294
ZHI#8.22_541.2980m/z	61.2693	38.6914	49.9803	85.1448	98.7135	91.9292	130.614	104.789	117.701	1.83931	2.35495
RPP#2.48_189.0514m/z	43.2493	44.4885	43.8689	62.1802	99.1937	80.687	53.9483	71.7165	62.8324	1.83927	1.43228
AHI#1.13_409.0304m/z	49.8516	57.4563	53.6539	112.213	85.0525	98.6325	193.289	193.168	193.228	1.83831	3.60138
ZHI#1.34_249.0428m/z	1412.64	1323.05	1367.84	2370.94	2655.97	2513.46	5407.62	5682.47	5545.04	1.83753	4.05386
[truncated: 33,131 more rows]

## Sheet: LmCM >10X FM
Feature	FM	FM'	AVGFM	LmCM	LmCM'	AVGLmCM	EcCM	EcCM'	AVGEcCM	AVGLmCM/AVGFM	AVGEcCM/AVGFM	AVGEcCM/AVGLmCM
ZHI#6.63_419.0485m/z	0.0044379	1.70523	0.854834	2592.78	2569.98	2581.38	0	0	0	3019.74	0	0
ZHI#6.71_610.0895m/z	1.19153	0	0.595767	191.163	151.828	171.496	0	0	0	287.857	0	0
ZHI#6.60_547.0383m/z	3.22688	1.6925	2.45969	89.2803	109.779	99.5295	0	0	0	40.4643	0	0
ZHI#6.63_594.1163m/z	18.5279	19.7144	19.1212	494.529	518.058	506.293	0	0	0	26.4782	0	0
ZHI#6.63_447.0486m/z	3.08799	0	1.544	34.7765	41.5989	38.1877	0	0	0	24.733	0	0
AHI#1.39_509.8756m/z	1.1e-07	1e-07	1.05e-07	198.774	174.071	186.422	1.1e-07	1e-07	1.05e-07	1.77545e+09	1	5.63237e-10
ZHI#6.68_438.0759m/z	1.1e-07	1e-07	1.05e-07	40.5009	19.7188	30.1099	1.1e-07	1e-07	1.05e-07	2.86761e+08	1	3.48723e-09
AHI#3.02_251.0220m/z	0.00302166	0	0.00151083	106.641	71.1682	88.9045	0	0.000105482	5.2741e-05	58844.9	0.0349087	5.93232e-07
ZHI#9.48_258.0383m/z	0	0.012438	0.00621901	160.399	209.58	184.99	0	0.0603197	0.0301599	29745.9	4.84963	0.000163035
ZHI#5.42_134.3088m/z	72.7695	0	36.3848	6083.99	6296.91	6190.45	1.29209	3.23715	2.26462	170.138	0.0622408	0.000365824
ZHI#5.42_134.1630m/z	187.153	193.36	190.256	2026.74	2224.43	2125.58	5.42305	0	2.71153	11.1722	0.014252	0.00127566
ZHI#5.42_134.1074m/z	0	0	0	1163.45	1160.64	1162.05	2.42313	2.58656	2.50484	#DIV/0!	#DIV/0!	0.00215554
ZHI#6.73_337.0128m/z	0	0	0	212.62	175.796	194.208	0	1.46915	0.734576	#DIV/0!	#DIV/0!	0.00378242
ZHI#6.63_307.0348m/z	41.5224	43.0496	42.286	14620.4	14850.8	14735.6	94.7511	44.1993	69.4752	348.475	1.64298	0.00471479
AHI#3.14_136.2968m/z	31.2675	8.54502	19.9063	1755.84	870.258	1313.05	12.9096	0	6.45479	65.9616	0.324259	0.00491588
ZHI#1.27_326.9669m/z	14.4066	15.4136	14.9101	607.713	720.803	664.258	2.61484	4.04442	3.32963	44.5508	0.223313	0.00501255
AHI#1.20_262.9856n	131.278	126.616	128.947	27040	26566.8	26803.4	152.044	158.184	155.114	207.864	1.20293	0.00578711
AHI#1.25_173.9612m/z	8.09816	6.96008	7.52912	1647.09	1575.32	1611.21	18.8541	10.6922	14.7731	213.997	1.96213	0.00916899
ZHI#1.55_331.0184m/z	3.51252	0	1.75626	596.533	547.82	572.177	10.9278	0	5.46391	325.793	3.11111	0.00954934
AHI#2.10_244.9751n	534.826	478.706	506.766	64080	66846.9	65463.5	756.654	667.877	712.266	129.179	1.40551	0.0108803
ZHI#6.71_684.1373m/z	0	2.95947	1.47973	179.705	200.69	190.197	4.15845	0	2.07923	128.535	1.40514	0.0109319
ZHI#6.60_553.0543m/z	21.4381	21.878	21.658	1162.63	1294.24	1228.43	22.713	5.16528	13.9391	56.7195	0.6436	0.0113471
ZHI#6.60_425.0655m/z	37.4957	48.4545	42.9751	5791.76	5902.07	5846.92	38.181	95.7008	66.9409	136.054	1.55767	0.0114489
ZHI#6.81_454.1132m/z	12.902	12.6231	12.7625	366.688	446.301	406.494	0	10.2831	5.14155	31.8506	0.402863	0.0126485
ZHI#3.86_249.0169m/z	16.0353	25.618	20.8267	1845.92	1712.8	1779.36	45.1657	9.01e-05	22.5829	85.4367	1.08433	0.0126916
ZHI#6.63_315.0274m/z	5.19935	5.31326	5.2563	244.303	295.89	270.096	0.00470426	6.89192	3.44831	51.3852	0.656033	0.012767
AHI#1.20_267.9643m/z	24.5338	16.5543	20.544	4384.14	4163.45	4273.8	67.3902	42.8663	55.1283	208.031	2.68342	0.0128991
ZHI#6.76_330.9968m/z	0	0	0	101.636	115.092	108.364	0	3.18859	1.5943	#DIV/0!	#DIV/0!	0.0147124
AHI#1.39_267.9642m/z	24.5715	21.0887	22.8301	1499.96	1435.92	1467.94	20.6969	28.108	24.4024	64.2983	1.06887	0.0166236
AHI#2.65_173.0419m/z	556.388	521.045	538.716	10687.9	10746.2	10717	135.321	227.333	181.327	19.8937	0.336591	0.0169195
ZHI#6.84_286.9689m/z	1.56353	0.53563	1.04958	155.04	174.482	164.761	0	5.64888	2.82444	156.977	2.69102	0.0171427
ZHI#6.73_369.0182m/z	4.48824	5.02191	4.75507	207.841	188.22	198.031	2.74016	4.52074	3.63045	41.6462	0.763489	0.0183327
RPP#1.19_136.0617m/z	5568.18	5496.76	5532.47	66421.5	67060.2	66740.9	1311.33	1266.77	1289.05	12.0635	0.232998	0.0193143
ZHI#6.71_690.1544m/z	0	6.39072	3.19536	156.478	155.651	156.064	6.22475	0	3.11237	48.841	0.97403	0.0199429
ZHI#10.02_655.1496m/z	26.3795	44.1104	35.245	1986.65	1951.09	1968.87	50.7437	29.5914	40.1675	55.8624	1.13967	0.0204013
AHI#1.95_354.0511m/z	60.1492	37.0212	48.5852	4449.22	4473.32	4461.27	87.468	100.995	94.2315	91.8236	1.93951	0.0211221
AHI#2.12_197.9590m/z	7.24709	5.42373	6.33541	174.234	229.583	201.908	3.00905	5.65893	4.33399	31.8698	0.68409	0.0214651
AHI#1.20_486.0430m/z	23.5169	10.9632	17.24	154.298	213.108	183.703	8.02413	0	4.01206	10.6556	0.232718	0.0218399
ZHI#6.63_420.0515m/z	15.9578	11.2112	13.5845	487.958	539.138	513.548	9.89574	12.92	11.4079	37.804	0.839772	0.0222139
AHI#1.63_145.9662m/z	1.74009	4.32135	3.03072	129.015	133.648	131.332	4.12157	1.81432	2.96794	43.3334	0.979286	0.0225989
AHI#1.69_284.9396m/z	7.8652	13.1802	10.5227	125.812	149.416	137.614	4.01838	2.29378	3.15608	13.0778	0.299931	0.0229344
ZHI#6.60_221.0122m/z	707.054	734.521	720.787	40177.2	40285.5	40231.3	1046.4	949.841	998.12	55.8158	1.38476	0.0248095
AHI#2.10_173.9612m/z	37.751	26.2794	32.0152	3080.1	3272.26	3176.18	91.5454	69.7007	80.623	99.2086	2.51828	0.0253836
AHI#2.00_243.9879m/z	13.6232	2.34797	7.98556	412.47	439.262	425.866	3.6697	18.5752	11.1225	53.3296	1.39282	0.0261173
ZHI#6.60_537.0794m/z	31.9906	23.0681	27.5294	1602.74	1590.12	1596.43	56.5654	29.6309	43.0981	57.9901	1.56553	0.0269966
AHI#2.01_283.9382m/z	54.7901	49.3	52.0451	1902.2	2066.73	1984.46	58.6713	51.8043	55.2378	38.1297	1.06135	0.0278351
AHI#1.98_328.0357m/z	17.5347	0.809005	9.17183	407.184	534.855	471.019	12.7262	13.7798	13.253	51.355	1.44497	0.0281369
AHI#1.25_191.9717m/z	8.34849	6.5686	7.45854	321.132	297.239	309.185	2.79333	15.1452	8.96926	41.4539	1.20255	0.0290093
ZHI#6.66_578.1423m/z	28.4863	24.0068	26.2466	1012.23	1005.93	1009.08	19.4141	39.5368	29.4755	38.4462	1.12302	0.0292102
AHI#1.36_199.9763m/z	4.01663	0.583003	2.29982	47.4957	37.1834	42.3395	2.68382	0	1.34191	18.41	0.583486	0.031694
AHI#1.05_215.9929m/z	4.92643	0.0302105	2.47832	112.357	62.2658	87.3116	5.63196	0	2.81598	35.2302	1.13625	0.0322521
AHI#1.22_215.9927m/z	3.42152	4.80513	4.11332	201.71	177.937	189.824	6.88836	5.52982	6.20909	46.1485	1.50951	0.0327098
AHI#3.07_371.0411m/z	196.05	252.925	224.488	2854.95	2963.12	2909.04	83.2008	107.838	95.5195	12.9586	0.4255	0.0328354
AHI#3.05_381.0370m/z	37.8514	61.064	49.4577	1633.24	2036.12	1834.68	53.1287	69.3116	61.2201	37.0959	1.23783	0.0333683
ZHI#6.58_546.0560m/z	0	0	0	116.969	145.518	131.244	9.00298	0	4.50149	#DIV/0!	#DIV/0!	0.0342987
ZHI#6.60_441.0398m/z	95.514	105.709	100.612	3033.85	3123.64	3078.75	104.835	107.662	106.249	30.6004	1.05603	0.0345103
ZHI#6.63_218.0190n	303.657	376.478	340.067	13498.6	13646.9	13572.7	460.288	496.349	478.319	39.9119	1.40654	0.0352411
AHI#2.15_305.9202m/z	34.3489	30.6523	32.5006	1049.95	1052.22	1051.08	31.4115	44.0223	37.7169	32.3405	1.1605	0.0358838
AHI#1.24_145.9663m/z	1.4283	2.71417	2.07123	113.646	140.024	126.835	5.55303	3.71741	4.63522	61.2366	2.2379	0.0365452
AHI#1.77_430.0330m/z	8.05912	12.5322	10.2957	231.408	127.777	179.592	4.2194	8.92999	6.5747	17.4435	0.638588	0.036609
ZHI#6.78_699.5052m/z	6.76425	2.99017	4.87721	59.9354	54.0812	57.0083	4.19585	0	2.09793	11.6887	0.430149	0.0368004
AHI#1.69_338.0412m/z	6.13715	7.203	6.67008	202.383	163.39	182.887	14.2452	0	7.12258	27.419	1.06784	0.0389453
ZHI#1.14_206.0596n	1129.97	1279.67	1204.82	57066	66018.1	61542.1	2425.78	2500.29	2463.04	51.0799	2.04432	0.040022
AHI#1.20_305.9202m/z	14.4962	18.4779	16.4871	409.56	459.914	434.737	12.1692	22.6809	17.4251	26.3684	1.05689	0.0400819
AHI#2.24_366.0391n	116.062	211.967	164.015	3515.57	4180.41	3847.99	118.361	207.091	162.726	23.4612	0.992142	0.0422886
AHI#1.69_339.0283n	154.39	195.71	175.05	5293.44	5441.32	5367.38	162.748	294.933	228.84	30.6619	1.30728	0.0426354
AHI#2.15_289.9463m/z	92.3305	103.19	97.7603	2468.65	2456.1	2462.38	114.966	98.838	106.902	25.1879	1.09351	0.0434141
ZHI#6.63_158.0060n	79.0554	89.0138	84.0346	3578.18	3394.8	3486.49	153.719	149.726	151.722	41.4888	1.80547	0.0435171
ZHI#6.68_619.2072m/z	48.0998	53.0065	50.5531	614.136	630.904	622.52	4.51533	50.096	27.3057	12.3142	0.540138	0.0438631
AHI#1.22_243.9879m/z	17.5411	26.9449	22.243	664.302	696.119	680.211	35.7211	24.6291	30.1751	30.5809	1.35661	0.0443614
ZHI#6.58_629.1093n	21.6547	52.2626	36.9586	435.301	477.19	456.245	26.4932	13.9919	20.2426	12.3448	0.547709	0.0443678
ZHI#6.50_140.1077m/z	67.333	67.2709	67.3019	790.51	795.911	793.211	36.0348	34.4192	35.227	11.7859	0.523417	0.0444106
AHI#1.03_263.0090m/z	0.323931	4.76683	2.54538	96.3587	138.878	117.618	4.45017	6.35879	5.40448	46.2085	2.12325	0.0459494
AHI#1.60_351.0378m/z	0	0	0	60.756	135.348	98.0518	9.02888	0	4.51444	#DIV/0!	#DIV/0!	0.0460414
ZHI#6.60_187.0416m/z	1066.96	1125.13	1096.04	26918.1	27588.8	27253.4	1341.06	1254.75	1297.91	24.8653	1.18418	0.0476236
ZHI#0.93_215.0729m/z	43.882	39.7974	41.8397	1178.44	1271.9	1225.17	62.5941	56.3933	59.4937	29.2824	1.42194	0.0485597
AHI#1.31_353.0438n	39.9978	41.2814	40.6396	2150.07	2637.29	2393.68	127.394	109.134	118.264	58.9002	2.91007	0.0494069
AHI#1.55_451.9980m/z	1.98336	22.7533	12.3683	160.251	239.785	200.018	15.7192	4.44414	10.0817	16.1718	0.815122	0.0504039
AHI#1.34_1002.4658m/z	30.4259	25.4793	27.9526	762.75	731.044	746.897	30.9218	45.288	38.1049	26.7201	1.3632	0.0510176
RPP#1.26_146.0322n	673.128	597.253	635.19	16663.2	16694.6	16678.9	901.547	803.698	852.622	26.2581	1.34231	0.0511198
ZHI#6.68_397.0136m/z	12.476	2.98238	7.72917	95.8412	118.16	107.001	3.62281	7.3804	5.50161	13.8438	0.711798	0.0514165
AHI#1.18_283.9381m/z	34.7368	30.2541	32.4954	1154.94	1178.34	1166.64	69.9872	53.6429	61.8151	35.9017	1.90227	0.0529855
AHI#1.91_446.0113m/z	16.9866	8.78999	12.8883	270.953	141.61	206.282	13.6148	8.59919	11.107	16.0053	0.861787	0.0538438
AHI#1.95_264.0197m/z	3.93747	32.2636	18.1006	613.971	586.19	600.08	39.6857	26.9978	33.3417	33.1526	1.84203	0.0555621
AHI#1.36_980.4019n	222.781	177.291	200.036	3694.41	3743.64	3719.03	214.474	200.644	207.559	18.5918	1.03761	0.0558099
AHI#1.32_848.3226n	240.416	230.134	235.275	5939.01	4265.21	5102.11	293.024	277.245	285.135	21.6857	1.21192	0.0558856
ZHI#7.22_310.1144m/z	127.366	93.6031	110.484	1779.11	1781.56	1780.33	91.1575	109.967	100.562	16.1139	0.910192	0.056485
AHI#1.69_539.8852m/z	11.7874	1.22701	6.50719	227.691	148.095	187.893	7.64032	13.599	10.6197	28.8747	1.63199	0.0565198
AHI#1.67_265.9698m/z	0	5.86424	2.93212	49.2309	33.9051	41.568	2.16081	2.61637	2.38859	14.1768	0.81463	0.0574622
AHI#1.34_958.4398m/z	58.4089	59.7652	59.087	1208.74	1088.56	1148.65	74.202	60.5438	67.3729	19.4399	1.14023	0.0586541
ZHI#6.63_202.0453n	4636.67	5327.82	4982.25	120256	121109	120683	7221.4	7273.44	7247.42	24.2225	1.45465	0.0600535
AHI#3.07_318.0406m/z	7.4982	22.3838	14.941	201.548	169.455	185.501	12.9879	9.46132	11.2246	12.4156	0.751263	0.0605096
AHI#3.21_192.0031m/z	6.88108	3.79579	5.33843	45.5016	60.7523	53.127	2.99331	3.52798	3.26065	9.95179	0.610787	0.0613746
AHI#1.69_377.9912m/z	6.01017	10.2157	8.11294	176.16	206.802	191.481	10.7914	12.8114	11.8014	23.602	1.45464	0.061632
ZHI#0.91_229.0889m/z	29.6373	17.3807	23.509	676.153	651.812	663.982	35.0328	48.0481	41.5405	28.2437	1.767	0.0625626
ZHI#1.55_154.0143m/z	2209.53	2188.85	2199.19	26401.9	27049.8	26725.8	1629.62	1736.15	1682.88	12.1526	0.765229	0.0629684
AHI#2.24_405.0019m/z	32.4973	29.8895	31.1934	348.7	365.613	357.157	19.4507	25.5585	22.5046	11.4498	0.721453	0.0630104
ZHI#6.60_569.0282m/z	20.6814	0.175102	10.4282	376.769	455.797	416.283	11.5622	41.6578	26.61	39.9188	2.55172	0.0639229
ZHI#3.91_117.0341m/z	77.1737	82.6664	79.92	1180.47	1204.1	1192.29	104.889	49.6602	77.2746	14.9185	0.966899	0.064812
AHI#2.08_218.9887m/z	125.341	106.689	116.015	3187.98	3273.8	3230.89	204.482	219.526	212.004	27.8489	1.82739	0.0656178
ZHI#6.58_319.0106m/z	7.90578	7.46361	7.68469	120.61	113.22	116.915	5.13676	10.2679	7.70235	15.214	1.0023	0.06588
AHI#1.76_429.0619m/z	19.7355	9.93542	14.8355	343.998	473.935	408.966	29.26	24.7151	26.9876	27.5668	1.81913	0.0659897
AHI#1.25_290.9474m/z	2.70859	1.63637	2.17248	68.9728	72.5262	70.7495	6.50444	2.84298	4.67371	32.5662	2.15132	0.06606
AHI#1.91_420.0616m/z	79.5417	0.439978	39.9908	1275.96	1174.17	1225.06	87.9196	76.9031	82.4113	30.6336	2.06076	0.067271
AHI#1.24_199.9764m/z	1.90276	0	0.95138	71.2194	71.6562	71.4378	5.72987	4.00528	4.86757	75.0886	5.11633	0.0681373
ZHI#8.89_565.0478m/z	7.65655	15.0021	11.3293	1611.17	1797.34	1704.25	136.229	101.238	118.734	150.428	10.4802	0.0696691
AHI#2.08_191.9717m/z	62.3064	63.1156	62.711	1081.77	1145.09	1113.43	83.8596	74.5768	79.2182	17.7549	1.26323	0.0711482
AHI#2.03_368.0548n	67.1953	97.2141	82.2047	1251.17	1365.99	1308.58	82.9465	105.638	94.2922	15.9185	1.14704	0.072057
AHI#1.31_914.4140m/z	85.9992	90.1869	88.0931	1439.61	1183.1	1311.36	125.017	67.3914	96.2042	14.886	1.09207	0.0733624
AHI#11.06_678.8959m/z	9.82102	13.8399	11.8305	314.979	315.254	315.116	22.7522	23.8134	23.2828	26.636	1.96804	0.0738863
AHI#1.84_372.0119m/z	8.75556	18.805	13.7803	202.714	177.454	190.084	25.6517	2.69617	14.1739	13.7939	1.02856	0.0745666
AHI#2.65_189.0156m/z	11.544	17.289	14.4165	187.748	153.878	170.813	18.7466	6.87299	12.8098	11.8485	0.888552	0.074993
AHI#2.91_173.0208m/z	15.0855	19.2651	17.1753	300.61	258.873	279.741	31.3345	10.9501	21.1423	16.2874	1.23097	0.075578
AHI#1.10_676.1836m/z	172.13	88.5456	130.338	1486.72	1453.11	1469.91	178.777	44.8533	111.815	11.2777	0.857889	0.0760695
AHI#3.07_369.0467m/z	22.9425	4.85814	13.9003	198.707	114.315	156.511	16.3466	8.19107	12.2688	11.2595	0.882629	0.0783894
AHI#1.95_466.0651m/z	17.3157	47.9166	32.6161	643.537	651.108	647.323	54.7835	47.6629	51.2232	19.8467	1.57049	0.0791309
AHI#1.29_852.3538n	159.113	126.661	142.887	1905.89	1629.74	1767.82	144.296	139.108	141.702	12.3721	0.991704	0.0801563
AHI#1.77_316.9958n	37.2631	33.7969	35.53	723.261	700.455	711.858	53.1906	61.6861	57.4383	20.0354	1.61662	0.0806879
AHI#1.05_283.9316n	8.64659	10.576	9.6113	124.798	113.986	119.392	13.9495	5.40456	9.67705	12.422	1.00684	0.0810529
AHI#1.25_511.9316n	15.5953	12.4094	14.0023	599.319	605.247	602.283	73.7094	24.4586	49.084	43.013	3.50541	0.0814966
AHI#1.05_266.9647n	49.943	54.7373	52.3401	614.151	602.596	608.374	50.8224	48.9154	49.8689	11.6235	0.952785	0.0819708
ZHI#6.84_420.2975m/z	3.61408	3.67544	3.64476	74.1192	89.3	81.7096	10.0461	3.65721	6.85167	22.4184	1.87987	0.0838539
AHI#1.05_307.9564m/z	13.4236	2.12713	7.77534	137.649	97.266	117.457	9.26598	10.8207	10.0433	15.1064	1.29169	0.0855062
AHI#2.98_124.0392m/z	4401.26	5713.28	5057.27	97158.4	126902	112030	8803.68	10468.4	9636.04	22.1523	1.90539	0.0860129
ZHI#6.68_662.1030m/z	0	1.37925	0.689623	94.408	101.032	97.7197	2.88901	14.0463	8.46768	141.7	12.2787	0.0866527
AHI#1.98_199.9766m/z	14.747	10.4799	12.6134	188.112	174.525	181.318	21.0052	10.4934	15.7493	14.375	1.24861	0.08686
ZHI#6.63_572.1246m/z	48.6322	51.1856	49.9089	662.782	588.061	625.422	51.344	58.0689	54.7064	12.5313	1.09612	0.0874713
AHI#1.62_179.9481m/z	13.6378	11.8638	12.7508	305.08	303.328	304.204	21.4519	32.6237	27.0378	23.8577	2.12048	0.0888806
AHI#1.25_826.3613m/z	113.8	135.627	124.713	1382.98	1239.08	1311.03	79.3641	153.955	116.66	10.5123	0.935421	0.0889831
AHI#3.07_588.9024m/z	30.6584	29.1505	29.9045	474.188	312.887	393.538	40.987	29.5066	35.2468	13.1598	1.17865	0.0895639
ZHI#6.55_327.0604m/z	9.99521	20.0688	15.032	206.804	191.211	199.008	19.9915	15.8014	17.8964	13.2389	1.19055	0.0899285
ZHI#6.58_568.0471m/z	35.5404	31.1548	33.3476	442.952	408.682	425.817	38.0911	38.7249	38.408	12.769	1.15175	0.0901984
AHI#1.25_199.9535n	101.369	146.493	123.931	7623	7420.51	7521.76	704.304	668.383	686.343	60.6932	5.53812	0.0912477
AHI#3.05_516.0913m/z	324.928	234.139	279.533	4558.25	4618.41	4588.33	413.659	432.461	423.06	16.4143	1.51345	0.0922035
ZHI#8.89_603.0039m/z	0.527072	5.3227	2.92488	312.712	268.562	290.637	2.79132	50.9231	26.8572	99.367	9.18231	0.0924081
ZHI#6.71_241.0302m/z	8.60867	5.15927	6.88397	105.619	100.753	103.186	14.4105	4.70346	9.55698	14.9893	1.38829	0.092619
AHI#1.34_936.4128n	408.122	545.131	476.626	5742.5	5321.51	5532	595.056	474.951	535.003	11.6066	1.12248	0.0967106
AHI#1.22_353.0242m/z	6.07069	7.15346	6.61208	133.113	110.561	121.837	8.30632	15.3299	11.8181	18.4264	1.78735	0.0969995
AHI#2.00_339.0283n	275.664	270.145	272.904	5462.94	5110.31	5286.62	479.272	555.646	517.459	19.3717	1.89612	0.0978808
AHI#12.32_331.5543n	90.1697	104.114	97.1419	1064.67	1214.84	1139.75	131.914	94.2665	113.09	11.7329	1.16417	0.0992233
AHI#1.77_391.0701n	94.2015	54.4112	74.3064	2444.47	3044.77	2744.62	251.141	299.737	275.439	36.9366	3.7068	0.100356
AHI#2.03_458.0864n	67.196	43.8341	55.515	1695.56	1883.05	1789.3	166.046	193.942	179.994	32.2309	3.24226	0.100595
AHI#2.24_457.0780m/z	176.335	237.705	207.02	2974.95	3387.76	3181.35	340.117	302.403	321.26	15.3674	1.55183	0.100982
ZHI#1.19_264.0304n	114.998	124.918	119.958	1307.59	1405.04	1356.31	154.792	122.951	138.871	11.3065	1.15767	0.102389
RPP#1.24_315.0515m/z	155.58	217.099	186.34	2005.91	2248.31	2127.11	224.341	215.35	219.846	11.4152	1.17981	0.103354
AHI#3.24_291.9285m/z	1.69834	5.31297	3.50565	44.2574	53.6254	48.9414	4.46696	5.71172	5.08934	13.9607	1.45175	0.103988
AHI#1.12_528.0817m/z	93.1858	116.29	104.738	1592.91	1423.95	1508.43	163.46	151.981	157.721	14.402	1.50586	0.104559
AHI#3.29_274.0049m/z	8.10781	5.09263	6.60022	95.9864	121.458	108.722	11.0995	11.921	11.5103	16.4725	1.74392	0.105869
AHI#2.00_430.0681m/z	55.2285	90.0809	72.6547	822.595	817.055	819.825	112.014	63.6783	87.8462	11.2839	1.20909	0.107152
AHI#1.03_1001.5721m/z	8.8247	31.1809	20.0028	272.879	277.476	275.177	19.0884	41.7634	30.4259	13.757	1.52108	0.110568
ZHI#6.66_613.1892m/z	7.60208	0.195028	3.89856	301.058	228.083	264.57	22.6185	36.2491	29.4338	67.8637	7.54992	0.111251
ZHI#6.66_482.1031m/z	106.051	74.0457	90.0482	975.598	960.552	968.075	111.067	105.984	108.526	10.7506	1.2052	0.112105
AHI#1.65_706.8546m/z	14.9486	13.9423	14.4454	277.43	262.54	269.985	35.5922	25.6373	30.6147	18.69	2.11933	0.113394
AHI#1.20_127.9555m/z	4.44204	6.85748	5.64976	70.9512	82.8914	76.9213	7.82279	9.75131	8.78705	13.615	1.5553	0.114234
AHI#1.24_482.0105m/z	13.4658	9.49201	11.4789	176.003	173.194	174.598	8.72562	32.4835	20.6045	15.2103	1.79499	0.118011
AHI#1.74_472.1022n	213.515	158.753	186.134	3624.76	4053.19	3838.97	382.71	524.353	453.532	20.6248	2.43659	0.118139
AHI#1.01_174.9697n	11.4441	11.5636	11.5039	233.781	244.685	239.233	27.4855	29.1639	28.3247	20.7958	2.46219	0.118398
AHI#1.93_397.0946m/z	154.772	119.243	137.008	1811.34	1738.46	1774.9	206.831	221.5	214.165	12.9547	1.56316	0.120663
ZHI#6.68_381.0391m/z	28.946	61.0893	45.0177	532.157	561.678	546.918	53.8464	78.2084	66.0274	12.149	1.4667	0.120726
AHI#1.62_684.3396m/z	40.9372	41.1633	41.0502	476.653	411.763	444.208	29.5688	78.7218	54.1453	10.8211	1.319	0.121892
AHI#1.51_618.8014m/z	24.4186	18.0071	21.2129	253.492	207.611	230.552	24.3778	32.3574	28.3676	10.8685	1.33728	0.123042
ZHI#6.60_218.9820m/z	250.585	235.267	242.926	2869.28	2812.62	2840.95	362.181	347.255	354.718	11.6947	1.46019	0.124859
RPP#5.58_195.5300m/z	0.75835	9.29899	5.02867	52.7116	48.1861	50.4488	3.76459	8.86195	6.31327	10.0322	1.25546	0.125142
AHI#1.24_394.9800m/z	12.6078	11.5296	12.0687	201.123	221.259	211.191	34.4712	18.3921	26.4317	17.4991	2.19011	0.125155
ZHI#6.58_423.1014m/z	17.3864	16.1933	16.7898	384.758	409.748	397.253	50.1	54.5903	52.3451	23.6603	3.11767	0.131768
AHI#1.20_791.1285m/z	5.48974	41.1002	23.2949	262.241	281.536	271.889	37.6214	35.2056	36.4135	11.6716	1.56315	0.133928
RPP#1.26_510.0732n	128.011	139.382	133.696	1262.65	1702.04	1482.35	242.667	158.713	200.69	11.0874	1.50109	0.135387
AHI#1.39_305.9200m/z	2.3762	8.53076	5.45348	98.1561	90.5665	94.3613	13.0653	12.7229	12.8941	17.303	2.36438	0.136646
ZHI#6.60_353.0443m/z	9.68698	10.4144	10.0507	184.51	133.866	159.188	20.8473	23.112	21.9796	15.8385	2.18687	0.138074
AHI#2.34_363.0380n	19.1434	34.1449	26.6442	326.965	392.212	359.589	77.5503	21.8506	49.7004	13.496	1.86534	0.138215
AHI#8.22_321.9488m/z	1.16464	4.23162	2.69813	67.8913	69.924	68.9076	11.8636	7.64691	9.75527	25.539	3.61556	0.14157
AHI#1.53_455.0759n	142.332	112.131	127.232	1766.86	1923.23	1845.04	292.233	243.07	267.652	14.5015	2.10366	0.145065
AHI#3.00_199.0298n	50.8997	22.34	36.6199	412.443	493.102	452.773	64.4477	67.2725	65.8601	12.3641	1.79848	0.14546
AHI#1.72_750.8813m/z	4.2773	3.04218	3.65974	168.098	133.13	150.614	25.017	19.3148	22.1659	41.1544	6.05669	0.14717
AHI#1.76_753.1977m/z	0.445311	18.3323	9.3888	164.502	229.826	197.164	36.1312	23.1929	29.6621	20.9999	3.1593	0.150444
ZHI#6.76_355.0761m/z	6.0516	0.65064	3.35112	328.769	290.139	309.454	45.8102	47.5023	46.6563	92.3434	13.9226	0.15077
AHI#1.34_945.3619n	52.4607	54.4146	53.4377	578.183	496.198	537.19	89.7815	72.4541	81.1178	10.0526	1.51799	0.151004
ZHI#6.66_466.1292m/z	190.373	259.358	224.865	2358.9	2327.53	2343.21	364.888	350.918	357.903	10.4205	1.59163	0.15274
ZHI#3.88_238.9886m/z	45.2697	16.6443	30.957	498.392	513.538	505.965	77.6302	79.4687	78.5494	16.3441	2.53737	0.155247
ZHI#6.58_739.1335m/z	13.0954	11.2747	12.1851	124.485	134.397	129.441	23.1662	17.4422	20.3042	10.6229	1.66632	0.15686
AHI#1.95_502.0383m/z	17.2695	14.6213	15.9454	466.804	429.371	448.087	60.3459	80.9915	70.6687	28.1014	4.43192	0.157712
AHI#2.33_199.9766m/z	0.980554	5.66203	3.32129	36.3285	42.4902	39.4094	8.01066	4.57091	6.29079	11.8657	1.89408	0.159627
ZHI#6.76_448.0550n	22.8961	21.4837	22.1899	467.146	417.038	442.092	75.8476	66.0445	70.9461	19.9231	3.19722	0.160478
AHI#12.96_566.0536n	43.4566	23.6561	33.5563	381.59	295.037	338.314	51.4192	59.9846	55.7019	10.082	1.65995	0.164646
ZHI#6.71_509.0277m/z	7.36439	4.92359	6.14399	103.226	72.1957	87.7108	14.2003	15.1563	14.6783	14.2759	2.38905	0.167349
AHI#1.12_488.0732n	440.702	852.835	646.768	6331.63	6600.21	6465.92	1057.6	1145.04	1101.32	9.99728	1.70281	0.170327
AHI#1.27_175.9765m/z	7.29173	1.53508	4.41341	57.3556	50.7285	54.0421	11.9025	6.60809	9.25528	12.245	2.09708	0.171261
AHI#3.09_395.0601n	82.5449	65.6268	74.0858	882.23	890.547	886.388	160.78	155.816	158.298	11.9643	2.13669	0.178588
ZHI#6.58_494.0962m/z	0	25.2327	12.6163	252.037	258.183	255.11	39.4731	53.5237	46.4984	20.2206	3.68557	0.182268
AHI#1.74_517.0736m/z	36.5328	49.0568	42.7948	526.856	627.072	576.964	83.0162	134.87	108.943	13.4821	2.54571	0.188821
AHI#1.88_448.0582m/z	301.572	320.521	311.046	5799.41	6205.1	6002.25	1086.69	1210.91	1148.8	19.297	3.69335	0.191395
AHI#1.25_460.0303m/z	29.7444	13.6999	21.7222	325.572	398.257	361.914	51.9349	92.4629	72.1989	16.661	3.32374	0.199492
AHI#1.82_444.0837m/z	0	25.5599	12.78	194.541	226.625	210.583	40.1411	51.3977	45.7694	16.4776	3.58134	0.217346
AHI#1.22_806.1377m/z	14.3297	20.4087	17.3692	211.956	162.751	187.354	48.4808	38.944	43.7124	10.7865	2.51666	0.233315
ZHI#3.78_301.0313m/z	157.749	148.008	152.879	1559.64	1597.2	1578.42	315.829	423.152	369.491	10.3246	2.41689	0.23409
AHI#3.29_838.0972m/z	5.09321	16.6666	10.8799	183.989	239.432	211.711	37.4662	64.8987	51.1825	19.4588	4.7043	0.241757
AHI#2.19_189.0157m/z	6.45828	0	3.22914	40.7045	46.0197	43.3621	12.2849	8.95458	10.6197	13.4284	3.28872	0.244908
AHI#1.67_560.1158m/z	30.2468	0	15.1234	200.245	180.702	190.473	32.7944	64.4817	48.6381	12.5946	3.21608	0.255354
AHI#1.95_381.0369m/z	106.554	152.826	129.69	1292.63	1333.62	1313.13	333.67	342.271	337.97	10.1251	2.60598	0.257378
AHI#2.52_319.9443m/z	11.3324	12.9304	12.1314	117.154	140.033	128.593	31.1029	36.294	33.6985	10.6	2.77778	0.262054
AHI#12.65_339.0141m/z	3.42804	2.63279	3.03041	39.5886	53.394	46.4913	7.98604	16.6678	12.3269	15.3416	4.06773	0.265144
ZHI#8.99_416.9370m/z	0	0	0	65.6537	50.9753	58.3145	10.3683	20.6296	15.499	#DIV/0!	#DIV/0!	0.265783
AHI#3.45_589.1563m/z	39.0919	7.70639	23.3991	522.459	573.008	547.734	154.36	140.094	147.227	23.4083	6.292	0.268794
ZHI#6.63_230.0188n	0.376968	3.41594	1.89646	71.6372	68.1382	69.8877	23.5907	18.1276	20.8591	36.8517	10.999	0.298467
ZHI#8.96_514.9137m/z	2.48665	5.34515	3.9159	188.84	172.838	180.839	59.1114	50.5469	54.8292	46.1807	14.0017	0.303194
AHI#5.75_387.0759m/z	12.9684	9.07535	11.0219	143.007	112.831	127.919	34.1326	47.5223	40.8274	11.606	3.70422	0.319165
AHI#12.63_243.0262m/z	42.1764	41.109	41.6427	406.701	496.979	451.84	153.862	141.402	147.632	10.8504	3.5452	0.326734
AHI#1.95_409.0095n	19.8866	39.5148	29.7007	312.883	300.564	306.723	109.036	104.303	106.67	10.3271	3.59149	0.347772
ZHI#3.94_339.0211m/z	13.7678	95.1058	54.4368	686.852	680.255	683.553	283.887	194.884	239.385	12.5568	4.39749	0.350207
ZHI#8.99_492.9320m/z	7.02447	4.45477	5.73962	177.541	194.046	185.793	71.6387	62.7024	67.1705	32.3703	11.703	0.361534
ZHI#8.99_394.9549m/z	35.7022	37.687	36.6946	651.713	621.579	636.646	242.367	220.622	231.494	17.3498	6.30867	0.363615
AHI#1.05_178.9409n	11.5574	11.2502	11.4038	196.282	189.269	192.775	78.4337	66.4701	72.4519	16.9045	6.35332	0.375836
ZHI#8.99_378.9810m/z	45.6806	48.2909	46.9857	453.199	547.999	500.599	183.653	210.505	197.079	10.6543	4.19445	0.393687
ZHI#6.63_706.1318m/z	17.4343	28.1368	22.7855	277.011	267.828	272.42	114.948	126.468	120.708	11.9558	5.29757	0.443095
ZHI#2.47_221.9901m/z	67.0369	67.7049	67.3709	1551.03	1504.67	1527.85	765.598	663.496	714.547	22.6782	10.6062	0.467682
AHI#4.28_399.0847m/z	0	0	0	44.6675	42.5844	43.6259	23.6137	24.4847	24.0492	#DIV/0!	#DIV/0!	0.551259
ZHI#2.73_138.1285m/z	29.7621	37.6335	33.6978	513.459	536.533	524.996	347.358	336.394	341.876	15.5795	10.1453	0.651197
AHI#2.03_250.0047m/z	30.9087	12.9769	21.9428	260.828	248.493	254.661	197.278	163.161	180.22	11.6057	8.21316	0.707685
ZHI#2.55_436.2547m/z	9.68187	0.0586569	4.87026	462.876	564.769	513.822	332.888	400.802	366.845	105.502	75.3234	0.713953
ZHI#5.55_283.0127m/z	14.5229	0	7.26146	150.747	89.3919	120.07	102.53	96.782	99.6558	16.5352	13.7239	0.829983
AHI#8.43_223.9718m/z	2.60878	10.8394	6.7241	196.657	168.93	182.794	157.502	172.561	165.031	27.1849	24.5432	0.902828
AHI#8.60_192.0241m/z	8.65282	7.9659	8.30936	107.644	97.6191	102.631	93.9237	105.651	99.7874	12.3513	12.009	0.972288
ZHI#5.58_553.3353m/z	0	0	0	67.4848	70.6454	69.0651	47.6761	86.6456	67.1608	#DIV/0!	#DIV/0!	0.972428
AHI#3.45_301.0860m/z	1.57116	12.3797	6.97541	141.501	49.4989	95.4998	135.462	75.0071	105.235	13.6909	15.0865	1.10194
AHI#2.00_201.9927m/z	5.35282	2.35743	3.85513	55.4385	34.7749	45.1067	64.3454	53.8649	59.1052	11.7004	15.3316	1.31034
ZHI#7.17_214.0330m/z	34.4969	44.9078	39.7024	396.22	416.462	406.341	605.312	591.099	598.206	10.2347	15.0673	1.47218
AHI#1.98_415.0214m/z	1.69959	6.90966	4.30463	57.7844	46.575	52.1797	70.2143	89.6331	79.9237	12.1218	18.5669	1.5317
ZHI#11.53_265.0857m/z	0.419969	5.15735	2.78866	29.041	29.4136	29.2273	96.306	113.905	105.105	10.4808	37.6903	3.59614
ZHI#5.68_484.0852m/z	6.01692	0	3.00846	59.1255	111.238	85.182	333.783	399.604	366.694	28.3141	121.887	4.30482
ZHI#6.07_160.0433m/z	0.0594849	0	0.0297425	141.262	133.098	137.18	697.783	622.118	659.951	4612.26	22188.8	4.81084
ZHI#5.68_344.9608m/z	26.8435	12.7918	19.8176	207.324	190.2	198.762	1020.17	1099.22	1059.7	10.0295	53.4723	5.33148
ZHI#5.65_328.9867m/z	12.9712	39.4349	26.2031	281.287	249.533	265.41	1516.85	1370.33	1443.59	10.129	55.0924	5.4391
ZHI#5.65_470.9334m/z	2.60231	0	1.30116	26.878	31.2616	29.0698	161.057	169.054	165.055	22.3415	126.853	5.6779
RPP#12.66_791.6233m/z	0	0	0	0	9.359	4.6795	41.7842	13.3163	27.5503	#DIV/0!	#DIV/0!	5.88744
ZHI#5.68_393.9730n	7.4441	8.32231	7.88321	159.311	161.687	160.499	1049.47	984.017	1016.74	20.3596	128.976	6.33489
ZHI#5.65_367.9757n	17.5571	4.7636	11.1603	139.114	107.725	123.42	845.388	858.212	851.8	11.0588	76.3238	6.90165
ZHI#5.65_454.9589m/z	8.47769	3.35759	5.91764	120.772	112.264	116.518	897.734	810.932	854.333	19.69	144.371	7.33219
ZHI#5.81_313.0164m/z	0	0	0	8.95368	43.5307	26.2422	183.766	232.435	208.101	#DIV/0!	#DIV/0!	7.93
ZHI#5.78_334.9986m/z	2.81517	2.40408	2.60962	60.2693	60.4079	60.3386	498.174	495.436	496.805	23.1216	190.374	8.23362
ZHI#5.65_307.0048m/z	3.76358	19.3551	11.5593	229.761	203.233	216.497	2089.79	1992.07	2040.93	18.7292	176.561	9.42704
ZHI#7.71_414.5471m/z	0	0	0	22.9811	24.3761	23.6786	224.613	254.359	239.486	#DIV/0!	#DIV/0!	10.114
ZHI#4.86_287.0208m/z	0	0	0	19.2336	12.976	16.1048	312.25	224.272	268.261	#DIV/0!	#DIV/0!	16.6572
ZHI#4.86_387.9510m/z	0	0	0	4.05134	2.61348	3.33241	44.7193	73.3335	59.0264	#DIV/0!	#DIV/0!	17.7128
ZHI#7.50_223.1081m/z	0	0	0	3.71358	0	1.85679	46.3868	51.8841	49.1354	#DIV/0!	#DIV/0!	26.4626
ZHI#5.65_558.9485m/z	1.11826	0	0.55913	15.9412	8.71697	12.3291	381.622	337.297	359.459	22.0505	642.89	29.1554
ZHI#5.60_491.0402m/z	0	0.100662	0.0503312	12.9005	8.12831	10.5144	363.862	303.885	333.874	208.904	6633.53	31.7539
ZHI#4.88_824.2483m/z	0	0	0	10.1138	3.13815	6.62596	278.194	237.794	257.994	#DIV/0!	#DIV/0!	38.9368
ZHI#8.61_554.1128m/z	0	0	0	10.4758	6.51045	8.49313	2465.99	2187.63	2326.81	#DIV/0!	#DIV/0!	273.963
ZHI#5.76_355.0272m/z	0	0	0	4.47448	0	2.23724	734.728	680.632	707.68	#DIV/0!	#DIV/0!	316.318
ZHI#8.91_367.9789m/z	0.133285	0	0.0666424	1.35328	0	0.676642	283.458	201.259	242.358	10.1533	3636.69	358.178
ZHI#7.60_221.0452m/z	0.000397949	0.00161569	0.00100682	0.410378	0	0.205189	130.543	96.8711	113.707	203.799	112937	554.158
ZHI#5.01_379.0051m/z	0.105742	0	0.0528708	0	2.26019	1.1301	1494.45	1271.32	1382.89	21.3747	26155.9	1223.69
ZHI#4.99_493.0631m/z	0	0	0	0.299088	0	0.149544	280.897	221.36	251.129	#DIV/0!	#DIV/0!	1679.3

## Sheet: EcCM <10X LmCM
Feature	FM	FM'	AVGFM	LmCM	LmCM'	AVGLmCM	EcCM	EcCM'	AVGEcCM	AVGLmCM/AVGFM	AVGEcCM/AVGFM	AVGEcCM/AVGLmCM
ZHI#6.63_419.0485m/z	0.0044379	1.70523	0.854834	2592.78	2569.98	2581.38	0	0	0	3019.74	0	0
ZHI#6.71_610.0895m/z	1.19153	0	0.595767	191.163	151.828	171.496	0	0	0	287.857	0	0
ZHI#6.60_547.0383m/z	3.22688	1.6925	2.45969	89.2803	109.779	99.5295	0	0	0	40.4643	0	0
ZHI#6.63_594.1163m/z	18.5279	19.7144	19.1212	494.529	518.058	506.293	0	0	0	26.4782	0	0
ZHI#6.63_447.0486m/z	3.08799	0	1.544	34.7765	41.5989	38.1877	0	0	0	24.733	0	0
AHI#1.39_509.8756m/z	1.1e-07	1e-07	1.05e-07	198.774	174.071	186.422	1.1e-07	1e-07	1.05e-07	1.77545e+09	1	5.63237e-10
ZHI#6.68_438.0759m/z	1.1e-07	1e-07	1.05e-07	40.5009	19.7188	30.1099	1.1e-07	1e-07	1.05e-07	2.86761e+08	1	3.48723e-09
AHI#3.02_251.0220m/z	0.00302166	0	0.00151083	106.641	71.1682	88.9045	0	0.000105482	5.2741e-05	58844.9	0.0349087	5.93232e-07
ZHI#9.48_258.0383m/z	0	0.012438	0.00621901	160.399	209.58	184.99	0	0.0603197	0.0301599	29745.9	4.84963	0.000163035
ZHI#5.42_134.3088m/z	72.7695	0	36.3848	6083.99	6296.91	6190.45	1.29209	3.23715	2.26462	170.138	0.0622408	0.000365824
ZHI#5.42_134.1630m/z	187.153	193.36	190.256	2026.74	2224.43	2125.58	5.42305	0	2.71153	11.1722	0.014252	0.00127566
ZHI#5.42_134.1074m/z	0	0	0	1163.45	1160.64	1162.05	2.42313	2.58656	2.50484	#DIV/0!	#DIV/0!	0.00215554
ZHI#6.73_337.0128m/z	0	0	0	212.62	175.796	194.208	0	1.46915	0.734576	#DIV/0!	#DIV/0!	0.00378242
ZHI#6.63_307.0348m/z	41.5224	43.0496	42.286	14620.4	14850.8	14735.6	94.7511	44.1993	69.4752	348.475	1.64298	0.00471479
AHI#3.14_136.2968m/z	31.2675	8.54502	19.9063	1755.84	870.258	1313.05	12.9096	0	6.45479	65.9616	0.324259	0.00491588
ZHI#1.27_326.9669m/z	14.4066	15.4136	14.9101	607.713	720.803	664.258	2.61484	4.04442	3.32963	44.5508	0.223313	0.00501255
AHI#1.20_262.9856n	131.278	126.616	128.947	27040	26566.8	26803.4	152.044	158.184	155.114	207.864	1.20293	0.00578711
AHI#1.25_173.9612m/z	8.09816	6.96008	7.52912	1647.09	1575.32	1611.21	18.8541	10.6922	14.7731	213.997	1.96213	0.00916899
ZHI#1.55_331.0184m/z	3.51252	0	1.75626	596.533	547.82	572.177	10.9278	0	5.46391	325.793	3.11111	0.00954934
AHI#2.10_244.9751n	534.826	478.706	506.766	64080	66846.9	65463.5	756.654	667.877	712.266	129.179	1.40551	0.0108803
ZHI#6.71_684.1373m/z	0	2.95947	1.47973	179.705	200.69	190.197	4.15845	0	2.07923	128.535	1.40514	0.0109319
ZHI#6.60_553.0543m/z	21.4381	21.878	21.658	1162.63	1294.24	1228.43	22.713	5.16528	13.9391	56.7195	0.6436	0.0113471
ZHI#6.60_425.0655m/z	37.4957	48.4545	42.9751	5791.76	5902.07	5846.92	38.181	95.7008	66.9409	136.054	1.55767	0.0114489
ZHI#6.81_454.1132m/z	12.902	12.6231	12.7625	366.688	446.301	406.494	0	10.2831	5.14155	31.8506	0.402863	0.0126485
ZHI#3.86_249.0169m/z	16.0353	25.618	20.8267	1845.92	1712.8	1779.36	45.1657	9.01e-05	22.5829	85.4367	1.08433	0.0126916
ZHI#6.63_315.0274m/z	5.19935	5.31326	5.2563	244.303	295.89	270.096	0.00470426	6.89192	3.44831	51.3852	0.656033	0.012767
AHI#1.20_267.9643m/z	24.5338	16.5543	20.544	4384.14	4163.45	4273.8	67.3902	42.8663	55.1283	208.031	2.68342	0.0128991
ZHI#6.76_330.9968m/z	0	0	0	101.636	115.092	108.364	0	3.18859	1.5943	#DIV/0!	#DIV/0!	0.0147124
AHI#1.39_267.9642m/z	24.5715	21.0887	22.8301	1499.96	1435.92	1467.94	20.6969	28.108	24.4024	64.2983	1.06887	0.0166236
AHI#2.65_173.0419m/z	556.388	521.045	538.716	10687.9	10746.2	10717	135.321	227.333	181.327	19.8937	0.336591	0.0169195
ZHI#6.84_286.9689m/z	1.56353	0.53563	1.04958	155.04	174.482	164.761	0	5.64888	2.82444	156.977	2.69102	0.0171427
ZHI#6.73_369.0182m/z	4.48824	5.02191	4.75507	207.841	188.22	198.031	2.74016	4.52074	3.63045	41.6462	0.763489	0.0183327
RPP#1.19_136.0617m/z	5568.18	5496.76	5532.47	66421.5	67060.2	66740.9	1311.33	1266.77	1289.05	12.0635	0.232998	0.0193143
ZHI#6.71_690.1544m/z	0	6.39072	3.19536	156.478	155.651	156.064	6.22475	0	3.11237	48.841	0.97403	0.0199429
ZHI#10.02_655.1496m/z	26.3795	44.1104	35.245	1986.65	1951.09	1968.87	50.7437	29.5914	40.1675	55.8624	1.13967	0.0204013
AHI#1.95_354.0511m/z	60.1492	37.0212	48.5852	4449.22	4473.32	4461.27	87.468	100.995	94.2315	91.8236	1.93951	0.0211221
AHI#2.12_197.9590m/z	7.24709	5.42373	6.33541	174.234	229.583	201.908	3.00905	5.65893	4.33399	31.8698	0.68409	0.0214651
AHI#1.20_486.0430m/z	23.5169	10.9632	17.24	154.298	213.108	183.703	8.02413	0	4.01206	10.6556	0.232718	0.0218399
ZHI#6.63_420.0515m/z	15.9578	11.2112	13.5845	487.958	539.138	513.548	9.89574	12.92	11.4079	37.804	0.839772	0.0222139
AHI#1.63_145.9662m/z	1.74009	4.32135	3.03072	129.015	133.648	131.332	4.12157	1.81432	2.96794	43.3334	0.979286	0.0225989
AHI#1.69_284.9396m/z	7.8652	13.1802	10.5227	125.812	149.416	137.614	4.01838	2.29378	3.15608	13.0778	0.299931	0.0229344
ZHI#6.60_221.0122m/z	707.054	734.521	720.787	40177.2	40285.5	40231.3	1046.4	949.841	998.12	55.8158	1.38476	0.0248095
AHI#2.10_173.9612m/z	37.751	26.2794	32.0152	3080.1	3272.26	3176.18	91.5454	69.7007	80.623	99.2086	2.51828	0.0253836
AHI#2.00_243.9879m/z	13.6232	2.34797	7.98556	412.47	439.262	425.866	3.6697	18.5752	11.1225	53.3296	1.39282	0.0261173
ZHI#6.60_537.0794m/z	31.9906	23.0681	27.5294	1602.74	1590.12	1596.43	56.5654	29.6309	43.0981	57.9901	1.56553	0.0269966
AHI#2.01_283.9382m/z	54.7901	49.3	52.0451	1902.2	2066.73	1984.46	58.6713	51.8043	55.2378	38.1297	1.06135	0.0278351
AHI#1.98_328.0357m/z	17.5347	0.809005	9.17183	407.184	534.855	471.019	12.7262	13.7798	13.253	51.355	1.44497	0.0281369
AHI#1.25_191.9717m/z	8.34849	6.5686	7.45854	321.132	297.239	309.185	2.79333	15.1452	8.96926	41.4539	1.20255	0.0290093
ZHI#6.66_578.1423m/z	28.4863	24.0068	26.2466	1012.23	1005.93	1009.08	19.4141	39.5368	29.4755	38.4462	1.12302	0.0292102
AHI#1.36_199.9763m/z	4.01663	0.583003	2.29982	47.4957	37.1834	42.3395	2.68382	0	1.34191	18.41	0.583486	0.031694
AHI#1.05_215.9929m/z	4.92643	0.0302105	2.47832	112.357	62.2658	87.3116	5.63196	0	2.81598	35.2302	1.13625	0.0322521
AHI#1.22_215.9927m/z	3.42152	4.80513	4.11332	201.71	177.937	189.824	6.88836	5.52982	6.20909	46.1485	1.50951	0.0327098
AHI#3.07_371.0411m/z	196.05	252.925	224.488	2854.95	2963.12	2909.04	83.2008	107.838	95.5195	12.9586	0.4255	0.0328354
AHI#3.05_381.0370m/z	37.8514	61.064	49.4577	1633.24	2036.12	1834.68	53.1287	69.3116	61.2201	37.0959	1.23783	0.0333683
ZHI#6.58_546.0560m/z	0	0	0	116.969	145.518	131.244	9.00298	0	4.50149	#DIV/0!	#DIV/0!	0.0342987
ZHI#6.60_441.0398m/z	95.514	105.709	100.612	3033.85	3123.64	3078.75	104.835	107.662	106.249	30.6004	1.05603	0.0345103
ZHI#6.63_218.0190n	303.657	376.478	340.067	13498.6	13646.9	13572.7	460.288	496.349	478.319	39.9119	1.40654	0.0352411
AHI#2.15_305.9202m/z	34.3489	30.6523	32.5006	1049.95	1052.22	1051.08	31.4115	44.0223	37.7169	32.3405	1.1605	0.0358838
AHI#1.24_145.9663m/z	1.4283	2.71417	2.07123	113.646	140.024	126.835	5.55303	3.71741	4.63522	61.2366	2.2379	0.0365452
AHI#1.77_430.0330m/z	8.05912	12.5322	10.2957	231.408	127.777	179.592	4.2194	8.92999	6.5747	17.4435	0.638588	0.036609
ZHI#6.78_699.5052m/z	6.76425	2.99017	4.87721	59.9354	54.0812	57.0083	4.19585	0	2.09793	11.6887	0.430149	0.0368004
AHI#1.69_338.0412m/z	6.13715	7.203	6.67008	202.383	163.39	182.887	14.2452	0	7.12258	27.419	1.06784	0.0389453
ZHI#1.14_206.0596n	1129.97	1279.67	1204.82	57066	66018.1	61542.1	2425.78	2500.29	2463.04	51.0799	2.04432	0.040022
AHI#1.20_305.9202m/z	14.4962	18.4779	16.4871	409.56	459.914	434.737	12.1692	22.6809	17.4251	26.3684	1.05689	0.0400819
AHI#2.24_366.0391n	116.062	211.967	164.015	3515.57	4180.41	3847.99	118.361	207.091	162.726	23.4612	0.992142	0.0422886
AHI#1.69_339.0283n	154.39	195.71	175.05	5293.44	5441.32	5367.38	162.748	294.933	228.84	30.6619	1.30728	0.0426354
AHI#2.15_289.9463m/z	92.3305	103.19	97.7603	2468.65	2456.1	2462.38	114.966	98.838	106.902	25.1879	1.09351	0.0434141
ZHI#6.63_158.0060n	79.0554	89.0138	84.0346	3578.18	3394.8	3486.49	153.719	149.726	151.722	41.4888	1.80547	0.0435171
ZHI#6.68_619.2072m/z	48.0998	53.0065	50.5531	614.136	630.904	622.52	4.51533	50.096	27.3057	12.3142	0.540138	0.0438631
AHI#1.22_243.9879m/z	17.5411	26.9449	22.243	664.302	696.119	680.211	35.7211	24.6291	30.1751	30.5809	1.35661	0.0443614
ZHI#6.58_629.1093n	21.6547	52.2626	36.9586	435.301	477.19	456.245	26.4932	13.9919	20.2426	12.3448	0.547709	0.0443678
ZHI#6.50_140.1077m/z	67.333	67.2709	67.3019	790.51	795.911	793.211	36.0348	34.4192	35.227	11.7859	0.523417	0.0444106
AHI#1.03_263.0090m/z	0.323931	4.76683	2.54538	96.3587	138.878	117.618	4.45017	6.35879	5.40448	46.2085	2.12325	0.0459494
AHI#1.60_351.0378m/z	0	0	0	60.756	135.348	98.0518	9.02888	0	4.51444	#DIV/0!	#DIV/0!	0.0460414
ZHI#6.60_187.0416m/z	1066.96	1125.13	1096.04	26918.1	27588.8	27253.4	1341.06	1254.75	1297.91	24.8653	1.18418	0.0476236
ZHI#0.93_215.0729m/z	43.882	39.7974	41.8397	1178.44	1271.9	1225.17	62.5941	56.3933	59.4937	29.2824	1.42194	0.0485597
AHI#1.31_353.0438n	39.9978	41.2814	40.6396	2150.07	2637.29	2393.68	127.394	109.134	118.264	58.9002	2.91007	0.0494069
AHI#1.55_451.9980m/z	1.98336	22.7533	12.3683	160.251	239.785	200.018	15.7192	4.44414	10.0817	16.1718	0.815122	0.0504039
AHI#1.34_1002.4658m/z	30.4259	25.4793	27.9526	762.75	731.044	746.897	30.9218	45.288	38.1049	26.7201	1.3632	0.0510176
RPP#1.26_146.0322n	673.128	597.253	635.19	16663.2	16694.6	16678.9	901.547	803.698	852.622	26.2581	1.34231	0.0511198
ZHI#6.68_397.0136m/z	12.476	2.98238	7.72917	95.8412	118.16	107.001	3.62281	7.3804	5.50161	13.8438	0.711798	0.0514165
AHI#1.18_283.9381m/z	34.7368	30.2541	32.4954	1154.94	1178.34	1166.64	69.9872	53.6429	61.8151	35.9017	1.90227	0.0529855
AHI#1.91_446.0113m/z	16.9866	8.78999	12.8883	270.953	141.61	206.282	13.6148	8.59919	11.107	16.0053	0.861787	0.0538438
AHI#1.95_264.0197m/z	3.93747	32.2636	18.1006	613.971	586.19	600.08	39.6857	26.9978	33.3417	33.1526	1.84203	0.0555621
AHI#1.36_980.4019n	222.781	177.291	200.036	3694.41	3743.64	3719.03	214.474	200.644	207.559	18.5918	1.03761	0.0558099
AHI#1.32_848.3226n	240.416	230.134	235.275	5939.01	4265.21	5102.11	293.024	277.245	285.135	21.6857	1.21192	0.0558856
ZHI#7.22_310.1144m/z	127.366	93.6031	110.484	1779.11	1781.56	1780.33	91.1575	109.967	100.562	16.1139	0.910192	0.056485
AHI#1.69_539.8852m/z	11.7874	1.22701	6.50719	227.691	148.095	187.893	7.64032	13.599	10.6197	28.8747	1.63199	0.0565198
AHI#1.67_265.9698m/z	0	5.86424	2.93212	49.2309	33.9051	41.568	2.16081	2.61637	2.38859	14.1768	0.81463	0.0574622
AHI#1.34_958.4398m/z	58.4089	59.7652	59.087	1208.74	1088.56	1148.65	74.202	60.5438	67.3729	19.4399	1.14023	0.0586541
ZHI#6.63_202.0453n	4636.67	5327.82	4982.25	120256	121109	120683	7221.4	7273.44	7247.42	24.2225	1.45465	0.0600535
AHI#3.07_318.0406m/z	7.4982	22.3838	14.941	201.548	169.455	185.501	12.9879	9.46132	11.2246	12.4156	0.751263	0.0605096
AHI#3.21_192.0031m/z	6.88108	3.79579	5.33843	45.5016	60.7523	53.127	2.99331	3.52798	3.26065	9.95179	0.610787	0.0613746
AHI#1.69_377.9912m/z	6.01017	10.2157	8.11294	176.16	206.802	191.481	10.7914	12.8114	11.8014	23.602	1.45464	0.061632
ZHI#0.91_229.0889m/z	29.6373	17.3807	23.509	676.153	651.812	663.982	35.0328	48.0481	41.5405	28.2437	1.767	0.0625626
ZHI#1.55_154.0143m/z	2209.53	2188.85	2199.19	26401.9	27049.8	26725.8	1629.62	1736.15	1682.88	12.1526	0.765229	0.0629684
AHI#2.24_405.0019m/z	32.4973	29.8895	31.1934	348.7	365.613	357.157	19.4507	25.5585	22.5046	11.4498	0.721453	0.0630104
ZHI#6.60_569.0282m/z	20.6814	0.175102	10.4282	376.769	455.797	416.283	11.5622	41.6578	26.61	39.9188	2.55172	0.0639229
ZHI#3.91_117.0341m/z	77.1737	82.6664	79.92	1180.47	1204.1	1192.29	104.889	49.6602	77.2746	14.9185	0.966899	0.064812
AHI#2.08_218.9887m/z	125.341	106.689	116.015	3187.98	3273.8	3230.89	204.482	219.526	212.004	27.8489	1.82739	0.0656178
ZHI#6.58_319.0106m/z	7.90578	7.46361	7.68469	120.61	113.22	116.915	5.13676	10.2679	7.70235	15.214	1.0023	0.06588
AHI#1.76_429.0619m/z	19.7355	9.93542	14.8355	343.998	473.935	408.966	29.26	24.7151	26.9876	27.5668	1.81913	0.0659897
AHI#1.25_290.9474m/z	2.70859	1.63637	2.17248	68.9728	72.5262	70.7495	6.50444	2.84298	4.67371	32.5662	2.15132	0.06606
AHI#1.91_420.0616m/z	79.5417	0.439978	39.9908	1275.96	1174.17	1225.06	87.9196	76.9031	82.4113	30.6336	2.06076	0.067271
AHI#1.24_199.9764m/z	1.90276	0	0.95138	71.2194	71.6562	71.4378	5.72987	4.00528	4.86757	75.0886	5.11633	0.0681373
ZHI#8.89_565.0478m/z	7.65655	15.0021	11.3293	1611.17	1797.34	1704.25	136.229	101.238	118.734	150.428	10.4802	0.0696691
AHI#2.08_191.9717m/z	62.3064	63.1156	62.711	1081.77	1145.09	1113.43	83.8596	74.5768	79.2182	17.7549	1.26323	0.0711482
AHI#2.03_368.0548n	67.1953	97.2141	82.2047	1251.17	1365.99	1308.58	82.9465	105.638	94.2922	15.9185	1.14704	0.072057
AHI#1.31_914.4140m/z	85.9992	90.1869	88.0931	1439.61	1183.1	1311.36	125.017	67.3914	96.2042	14.886	1.09207	0.0733624
AHI#11.06_678.8959m/z	9.82102	13.8399	11.8305	314.979	315.254	315.116	22.7522	23.8134	23.2828	26.636	1.96804	0.0738863
AHI#1.84_372.0119m/z	8.75556	18.805	13.7803	202.714	177.454	190.084	25.6517	2.69617	14.1739	13.7939	1.02856	0.0745666
AHI#2.65_189.0156m/z	11.544	17.289	14.4165	187.748	153.878	170.813	18.7466	6.87299	12.8098	11.8485	0.888552	0.074993
AHI#2.91_173.0208m/z	15.0855	19.2651	17.1753	300.61	258.873	279.741	31.3345	10.9501	21.1423	16.2874	1.23097	0.075578
AHI#1.10_676.1836m/z	172.13	88.5456	130.338	1486.72	1453.11	1469.91	178.777	44.8533	111.815	11.2777	0.857889	0.0760695
AHI#3.07_369.0467m/z	22.9425	4.85814	13.9003	198.707	114.315	156.511	16.3466	8.19107	12.2688	11.2595	0.882629	0.0783894
AHI#1.95_466.0651m/z	17.3157	47.9166	32.6161	643.537	651.108	647.323	54.7835	47.6629	51.2232	19.8467	1.57049	0.0791309
AHI#1.29_852.3538n	159.113	126.661	142.887	1905.89	1629.74	1767.82	144.296	139.108	141.702	12.3721	0.991704	0.0801563
AHI#1.77_316.9958n	37.2631	33.7969	35.53	723.261	700.455	711.858	53.1906	61.6861	57.4383	20.0354	1.61662	0.0806879
AHI#1.05_283.9316n	8.64659	10.576	9.6113	124.798	113.986	119.392	13.9495	5.40456	9.67705	12.422	1.00684	0.0810529
AHI#1.25_511.9316n	15.5953	12.4094	14.0023	599.319	605.247	602.283	73.7094	24.4586	49.084	43.013	3.50541	0.0814966
AHI#1.05_266.9647n	49.943	54.7373	52.3401	614.151	602.596	608.374	50.8224	48.9154	49.8689	11.6235	0.952785	0.0819708
ZHI#6.84_420.2975m/z	3.61408	3.67544	3.64476	74.1192	89.3	81.7096	10.0461	3.65721	6.85167	22.4184	1.87987	0.0838539
AHI#1.05_307.9564m/z	13.4236	2.12713	7.77534	137.649	97.266	117.457	9.26598	10.8207	10.0433	15.1064	1.29169	0.0855062
AHI#2.98_124.0392m/z	4401.26	5713.28	5057.27	97158.4	126902	112030	8803.68	10468.4	9636.04	22.1523	1.90539	0.0860129
ZHI#6.68_662.1030m/z	0	1.37925	0.689623	94.408	101.032	97.7197	2.88901	14.0463	8.46768	141.7	12.2787	0.0866527
AHI#1.98_199.9766m/z	14.747	10.4799	12.6134	188.112	174.525	181.318	21.0052	10.4934	15.7493	14.375	1.24861	0.08686
ZHI#6.63_572.1246m/z	48.6322	51.1856	49.9089	662.782	588.061	625.422	51.344	58.0689	54.7064	12.5313	1.09612	0.0874713
AHI#1.62_179.9481m/z	13.6378	11.8638	12.7508	305.08	303.328	304.204	21.4519	32.6237	27.0378	23.8577	2.12048	0.0888806
AHI#1.25_826.3613m/z	113.8	135.627	124.713	1382.98	1239.08	1311.03	79.3641	153.955	116.66	10.5123	0.935421	0.0889831
AHI#3.07_588.9024m/z	30.6584	29.1505	29.9045	474.188	312.887	393.538	40.987	29.5066	35.2468	13.1598	1.17865	0.0895639
ZHI#6.55_327.0604m/z	9.99521	20.0688	15.032	206.804	191.211	199.008	19.9915	15.8014	17.8964	13.2389	1.19055	0.0899285
ZHI#6.58_568.0471m/z	35.5404	31.1548	33.3476	442.952	408.682	425.817	38.0911	38.7249	38.408	12.769	1.15175	0.0901984
AHI#1.25_199.9535n	101.369	146.493	123.931	7623	7420.51	7521.76	704.304	668.383	686.343	60.6932	5.53812	0.0912477
AHI#3.05_516.0913m/z	324.928	234.139	279.533	4558.25	4618.41	4588.33	413.659	432.461	423.06	16.4143	1.51345	0.0922035
ZHI#8.89_603.0039m/z	0.527072	5.3227	2.92488	312.712	268.562	290.637	2.79132	50.9231	26.8572	99.367	9.18231	0.0924081
ZHI#6.71_241.0302m/z	8.60867	5.15927	6.88397	105.619	100.753	103.186	14.4105	4.70346	9.55698	14.9893	1.38829	0.092619
AHI#1.34_936.4128n	408.122	545.131	476.626	5742.5	5321.51	5532	595.056	474.951	535.003	11.6066	1.12248	0.0967106
AHI#1.22_353.0242m/z	6.07069	7.15346	6.61208	133.113	110.561	121.837	8.30632	15.3299	11.8181	18.4264	1.78735	0.0969995
AHI#2.00_339.0283n	275.664	270.145	272.904	5462.94	5110.31	5286.62	479.272	555.646	517.459	19.3717	1.89612	0.0978808
AHI#12.32_331.5543n	90.1697	104.114	97.1419	1064.67	1214.84	1139.75	131.914	94.2665	113.09	11.7329	1.16417	0.0992233
AHI#1.77_391.0701n	94.2015	54.4112	74.3064	2444.47	3044.77	2744.62	251.141	299.737	275.439	36.9366	3.7068	0.100356
AHI#2.03_458.0864n	67.196	43.8341	55.515	1695.56	1883.05	1789.3	166.046	193.942	179.994	32.2309	3.24226	0.100595
AHI#2.24_457.0780m/z	176.335	237.705	207.02	2974.95	3387.76	3181.35	340.117	302.403	321.26	15.3674	1.55183	0.100982
ZHI#1.19_264.0304n	114.998	124.918	119.958	1307.59	1405.04	1356.31	154.792	122.951	138.871	11.3065	1.15767	0.102389
RPP#1.24_315.0515m/z	155.58	217.099	186.34	2005.91	2248.31	2127.11	224.341	215.35	219.846	11.4152	1.17981	0.103354
AHI#3.24_291.9285m/z	1.69834	5.31297	3.50565	44.2574	53.6254	48.9414	4.46696	5.71172	5.08934	13.9607	1.45175	0.103988
AHI#1.12_528.0817m/z	93.1858	116.29	104.738	1592.91	1423.95	1508.43	163.46	151.981	157.721	14.402	1.50586	0.104559
AHI#3.29_274.0049m/z	8.10781	5.09263	6.60022	95.9864	121.458	108.722	11.0995	11.921	11.5103	16.4725	1.74392	0.105869
AHI#2.00_430.0681m/z	55.2285	90.0809	72.6547	822.595	817.055	819.825	112.014	63.6783	87.8462	11.2839	1.20909	0.107152
AHI#1.03_1001.5721m/z	8.8247	31.1809	20.0028	272.879	277.476	275.177	19.0884	41.7634	30.4259	13.757	1.52108	0.110568
ZHI#6.66_613.1892m/z	7.60208	0.195028	3.89856	301.058	228.083	264.57	22.6185	36.2491	29.4338	67.8637	7.54992	0.111251
ZHI#6.66_482.1031m/z	106.051	74.0457	90.0482	975.598	960.552	968.075	111.067	105.984	108.526	10.7506	1.2052	0.112105
AHI#1.65_706.8546m/z	14.9486	13.9423	14.4454	277.43	262.54	269.985	35.5922	25.6373	30.6147	18.69	2.11933	0.113394
AHI#1.20_127.9555m/z	4.44204	6.85748	5.64976	70.9512	82.8914	76.9213	7.82279	9.75131	8.78705	13.615	1.5553	0.114234
AHI#1.24_482.0105m/z	13.4658	9.49201	11.4789	176.003	173.194	174.598	8.72562	32.4835	20.6045	15.2103	1.79499	0.118011
AHI#1.74_472.1022n	213.515	158.753	186.134	3624.76	4053.19	3838.97	382.71	524.353	453.532	20.6248	2.43659	0.118139
AHI#1.01_174.9697n	11.4441	11.5636	11.5039	233.781	244.685	239.233	27.4855	29.1639	28.3247	20.7958	2.46219	0.118398
AHI#1.93_397.0946m/z	154.772	119.243	137.008	1811.34	1738.46	1774.9	206.831	221.5	214.165	12.9547	1.56316	0.120663
ZHI#6.68_381.0391m/z	28.946	61.0893	45.0177	532.157	561.678	546.918	53.8464	78.2084	66.0274	12.149	1.4667	0.120726
AHI#1.62_684.3396m/z	40.9372	41.1633	41.0502	476.653	411.763	444.208	29.5688	78.7218	54.1453	10.8211	1.319	0.121892
AHI#1.51_618.8014m/z	24.4186	18.0071	21.2129	253.492	207.611	230.552	24.3778	32.3574	28.3676	10.8685	1.33728	0.123042
ZHI#6.60_218.9820m/z	250.585	235.267	242.926	2869.28	2812.62	2840.95	362.181	347.255	354.718	11.6947	1.46019	0.124859
RPP#5.58_195.5300m/z	0.75835	9.29899	5.02867	52.7116	48.1861	50.4488	3.76459	8.86195	6.31327	10.0322	1.25546	0.125142
AHI#1.24_394.9800m/z	12.6078	11.5296	12.0687	201.123	221.259	211.191	34.4712	18.3921	26.4317	17.4991	2.19011	0.125155
ZHI#6.58_423.1014m/z	17.3864	16.1933	16.7898	384.758	409.748	397.253	50.1	54.5903	52.3451	23.6603	3.11767	0.131768
AHI#1.20_791.1285m/z	5.48974	41.1002	23.2949	262.241	281.536	271.889	37.6214	35.2056	36.4135	11.6716	1.56315	0.133928
RPP#1.26_510.0732n	128.011	139.382	133.696	1262.65	1702.04	1482.35	242.667	158.713	200.69	11.0874	1.50109	0.135387
AHI#1.39_305.9200m/z	2.3762	8.53076	5.45348	98.1561	90.5665	94.3613	13.0653	12.7229	12.8941	17.303	2.36438	0.136646
ZHI#6.60_353.0443m/z	9.68698	10.4144	10.0507	184.51	133.866	159.188	20.8473	23.112	21.9796	15.8385	2.18687	0.138074
AHI#2.34_363.0380n	19.1434	34.1449	26.6442	326.965	392.212	359.589	77.5503	21.8506	49.7004	13.496	1.86534	0.138215
AHI#8.22_321.9488m/z	1.16464	4.23162	2.69813	67.8913	69.924	68.9076	11.8636	7.64691	9.75527	25.539	3.61556	0.14157
AHI#1.53_455.0759n	142.332	112.131	127.232	1766.86	1923.23	1845.04	292.233	243.07	267.652	14.5015	2.10366	0.145065
AHI#3.00_199.0298n	50.8997	22.34	36.6199	412.443	493.102	452.773	64.4477	67.2725	65.8601	12.3641	1.79848	0.14546
AHI#1.72_750.8813m/z	4.2773	3.04218	3.65974	168.098	133.13	150.614	25.017	19.3148	22.1659	41.1544	6.05669	0.14717

## Sheet: short list
Feature	FM	FM'	AVGFM	LmCM	LmCM'	AVGLmCM	EcCM	EcCM'	AVGEcCM	AVGLmCM/AVGFM	AVGEcCM/AVGFM	AVGEcCM/AVGLmCM	t-test (FM vs LmCM)	t-test (LmCM vs EcCM)
AHI#1.01_174.9697n	11.4441	11.5636	11.5039	233.781	244.685	239.233	27.4855	29.1639	28.3247	20.7958	2.46219	0.118398	0.000572739	0.000683364
AHI#1.03_1001.5721m/z	8.8247	31.1809	20.0028	272.879	277.476	275.177	19.0884	41.7634	30.4259	13.757	1.52108	0.110568	0.0019941	0.00222652
AHI#1.03_263.0090m/z	0.323931	4.76683	2.54538	96.3587	138.878	117.618	4.45017	6.35879	5.40448	46.2085	2.12325	0.0459494	0.0328156	0.0341348
AHI#1.05_215.9929m/z	4.92643	0.0302105	2.47832	112.357	62.2658	87.3116	5.63196	0	2.81598	35.2302	1.13625	0.0322521	0.0778586	0.0786229
AHI#1.05_266.9647n	49.943	54.7373	52.3401	614.151	602.596	608.374	50.8224	48.9154	49.8689	11.6235	0.952785	0.0819708	0.000126534	0.000109915
AHI#1.05_283.9316n	8.64659	10.576	9.6113	124.798	113.986	119.392	13.9495	5.40456	9.67705	12.422	1.00684	0.0810529	0.00249293	0.00392124
AHI#1.05_307.9564m/z	13.4236	2.12713	7.77534	137.649	97.266	117.457	9.26598	10.8207	10.0433	15.1064	1.29169	0.0855062	0.0346526	0.0336135
AHI#1.10_676.1836m/z	172.13	88.5456	130.338	1486.72	1453.11	1469.91	178.777	44.8533	111.815	11.2777	0.857889	0.0760695	0.00112878	0.0025742
AHI#1.12_528.0817m/z	93.1858	116.29	104.738	1592.91	1423.95	1508.43	163.46	151.981	157.721	14.402	1.50586	0.104559	0.00366952	0.00390687
AHI#1.18_283.9381m/z	34.7368	30.2541	32.4954	1154.94	1178.34	1166.64	69.9872	53.6429	61.8151	35.9017	1.90227	0.0529855	0.000110266	0.00016677
AHI#1.20_127.9555m/z	4.44204	6.85748	5.64976	70.9512	82.8914	76.9213	7.82279	9.75131	8.78705	13.615	1.5553	0.114234	0.00722477	0.00778614
AHI#1.20_262.9856n	131.278	126.616	128.947	27040	26566.8	26803.4	152.044	158.184	155.114	207.864	1.20293	0.00578711	7.86697e-05	7.88299e-05
AHI#1.20_267.9643m/z	24.5338	16.5543	20.544	4384.14	4163.45	4273.8	67.3902	42.8663	55.1283	208.031	2.68342	0.0128991	0.000673294	0.000691905
AHI#1.20_305.9202m/z	14.4962	18.4779	16.4871	409.56	459.914	434.737	12.1692	22.6809	17.4251	26.3684	1.05689	0.0400819	0.00362645	0.00377704
AHI#1.20_486.0430m/z	23.5169	10.9632	17.24	154.298	213.108	183.703	8.02413	0	4.01206	10.6556	0.232718	0.0218399	0.0311106	0.0262092
AHI#1.20_791.1285m/z	5.48974	41.1002	23.2949	262.241	281.536	271.889	37.6214	35.2056	36.4135	11.6716	1.56315	0.133928	0.00657068	0.0017005
AHI#1.22_215.9927m/z	3.42152	4.80513	4.11332	201.71	177.937	189.824	6.88836	5.52982	6.20909	46.1485	1.50951	0.0327098	0.00408525	0.00417795
AHI#1.22_243.9879m/z	17.5411	26.9449	22.243	664.302	696.119	680.211	35.7211	24.6291	30.1751	30.5809	1.35661	0.0443614	0.000635042	0.000671051
AHI#1.22_353.0242m/z	6.07069	7.15346	6.61208	133.113	110.561	121.837	8.30632	15.3299	11.8181	18.4264	1.78735	0.0969995	0.00946329	0.0113285
AHI#1.24_145.9663m/z	1.4283	2.71417	2.07123	113.646	140.024	126.835	5.55303	3.71741	4.63522	61.2366	2.2379	0.0365452	0.0110166	0.0115035
AHI#1.24_199.9764m/z	1.90276	0	0.95138	71.2194	71.6562	71.4378	5.72987	4.00528	4.86757	75.0886	5.11633	0.0681373	0.000191725	0.000178501
AHI#1.24_394.9800m/z	12.6078	11.5296	12.0687	201.123	221.259	211.191	34.4712	18.3921	26.4317	17.4991	2.19011	0.125155	0.00255416	0.00482785
AHI#1.24_482.0105m/z	13.4658	9.49201	11.4789	176.003	173.194	174.598	8.72562	32.4835	20.6045	15.2103	1.79499	0.118011	0.000222458	0.00597957
AHI#1.25_173.9612m/z	8.09816	6.96008	7.52912	1647.09	1575.32	1611.21	18.8541	10.6922	14.7731	213.997	1.96213	0.00916899	0.000500356	0.000511301
AHI#1.25_191.9717m/z	8.34849	6.5686	7.45854	321.132	297.239	309.185	2.79333	15.1452	8.96926	41.4539	1.20255	0.0290093	0.0015726	0.0020006
AHI#1.25_199.9535n	101.369	146.493	123.931	7623	7420.51	7521.76	704.304	668.383	686.343	60.6932	5.53812	0.0912477	0.000196541	0.000226214
AHI#1.25_290.9474m/z	2.70859	1.63637	2.17248	68.9728	72.5262	70.7495	6.50444	2.84298	4.67371	32.5662	2.15132	0.06606	0.000731553	0.00148735
AHI#1.25_511.9316n	15.5953	12.4094	14.0023	599.319	605.247	602.283	73.7094	24.4586	49.084	43.013	3.50541	0.0814966	3.27198e-05	0.00200421
AHI#1.25_826.3613m/z	113.8	135.627	124.713	1382.98	1239.08	1311.03	79.3641	153.955	116.66	10.5123	0.935421	0.0889831	0.00374181	0.00457236
AHI#1.29_852.3538n	159.113	126.661	142.887	1905.89	1629.74	1767.82	144.296	139.108	141.702	12.3721	0.991704	0.0801563	0.00724101	0.00713562
AHI#1.31_353.0438n	39.9978	41.2814	40.6396	2150.07	2637.29	2393.68	127.394	109.134	118.264	58.9002	2.91007	0.0494069	0.0105493	0.0112845
AHI#1.31_914.4140m/z	85.9992	90.1869	88.0931	1439.61	1183.1	1311.36	125.017	67.3914	96.2042	14.886	1.09207	0.0733624	0.0108173	0.0115004
AHI#1.32_848.3226n	240.416	230.134	235.275	5939.01	4265.21	5102.11	293.024	277.245	285.135	21.6857	1.21192	0.0558856	0.0283211	0.0288866
AHI#1.34_1002.4658m/z	30.4259	25.4793	27.9526	762.75	731.044	746.897	30.9218	45.288	38.1049	26.7201	1.3632	0.0510176	0.000497659	0.000602383
AHI#1.34_936.4128n	408.122	545.131	476.626	5742.5	5321.51	5532	595.056	474.951	535.003	11.6066	1.12248	0.0967106	0.00191186	0.00191339
AHI#1.34_958.4398m/z	58.4089	59.7652	59.087	1208.74	1088.56	1148.65	74.202	60.5438	67.3729	19.4399	1.14023	0.0586541	0.00302797	0.00311347
AHI#1.36_199.9763m/z	4.01663	0.583003	2.29982	47.4957	37.1834	42.3395	2.68382	0	1.34191	18.41	0.583486	0.031694	0.0179278	0.0164725
AHI#1.36_980.4019n	222.781	177.291	200.036	3694.41	3743.64	3719.03	214.474	200.644	207.559	18.5918	1.03761	0.0558099	9.06841e-05	5.30033e-05
AHI#1.39_267.9642m/z	24.5715	21.0887	22.8301	1499.96	1435.92	1467.94	20.6969	28.108	24.4024	64.2983	1.06887	0.0166236	0.000492041	0.000498239
AHI#1.39_305.9200m/z	2.3762	8.53076	5.45348	98.1561	90.5665	94.3613	13.0653	12.7229	12.8941	17.303	2.36438	0.136646	0.00300619	0.00216714
AHI#1.39_509.8756m/z	1.1e-07	1e-07	1.05e-07	198.774	174.071	186.422	1.1e-07	1e-07	1.05e-07	1.77545e+09	1	5.63237e-10	0.00436075	0.00436075
AHI#1.51_618.8014m/z	24.4186	18.0071	21.2129	253.492	207.611	230.552	24.3778	32.3574	28.3676	10.8685	1.33728	0.123042	0.0120231	0.0130051
AHI#1.53_455.0759n	142.332	112.131	127.232	1766.86	1923.23	1845.04	292.233	243.07	267.652	14.5015	2.10366	0.145065	0.00214182	0.00268864
AHI#1.55_451.9980m/z	1.98336	22.7533	12.3683	160.251	239.785	200.018	15.7192	4.44414	10.0817	16.1718	0.815122	0.0504039	0.0447766	0.0419254
AHI#1.60_351.0378m/z	0	0	0	60.756	135.348	98.0518	9.02888	0	4.51444	#DIV/0!	#DIV/0!	0.0460414	0.119331	0.130476
AHI#1.62_179.9481m/z	13.6378	11.8638	12.7508	305.08	303.328	304.204	21.4519	32.6237	27.0378	23.8577	2.12048	0.0888806	1.82939e-05	0.000415896
AHI#1.62_684.3396m/z	40.9372	41.1633	41.0502	476.653	411.763	444.208	29.5688	78.7218	54.1453	10.8211	1.319	0.121892	0.00641424	0.0107137
AHI#1.63_145.9662m/z	1.74009	4.32135	3.03072	129.015	133.648	131.332	4.12157	1.81432	2.96794	43.3334	0.979286	0.0225989	0.000427027	0.000406311
AHI#1.65_706.8546m/z	14.9486	13.9423	14.4454	277.43	262.54	269.985	35.5922	25.6373	30.6147	18.69	2.11933	0.113394	0.000851594	0.0013968
AHI#1.67_265.9698m/z	0	5.86424	2.93212	49.2309	33.9051	41.568	2.16081	2.61637	2.38859	14.1768	0.81463	0.0574622	0.0422588	0.03622
AHI#1.69_284.9396m/z	7.8652	13.1802	10.5227	125.812	149.416	137.614	4.01838	2.29378	3.15608	13.0778	0.299931	0.0229344	0.00893952	0.00765684
AHI#1.69_338.0412m/z	6.13715	7.203	6.67008	202.383	163.39	182.887	14.2452	0	7.12258	27.419	1.06784	0.0389453	0.0120296	0.0136612
AHI#1.69_339.0283n	154.39	195.71	175.05	5293.44	5441.32	5367.38	162.748	294.933	228.84	30.6619	1.30728	0.0426354	0.000218567	0.000372301
AHI#1.69_377.9912m/z	6.01017	10.2157	8.11294	176.16	206.802	191.481	10.7914	12.8114	11.8014	23.602	1.45464	0.061632	0.00703756	0.00722318
AHI#1.69_539.8852m/z	11.7874	1.22701	6.50719	227.691	148.095	187.893	7.64032	13.599	10.6197	28.8747	1.63199	0.0565198	0.0456586	0.047128
AHI#1.72_750.8813m/z	4.2773	3.04218	3.65974	168.098	133.13	150.614	25.017	19.3148	22.1659	41.1544	6.05669	0.14717	0.0138786	0.0184946
AHI#1.74_472.1022n	213.515	158.753	186.134	3624.76	4053.19	3838.97	382.71	524.353	453.532	20.6248	2.43659	0.118139	0.00347707	0.00441208
AHI#1.76_429.0619m/z	19.7355	9.93542	14.8355	343.998	473.935	408.966	29.26	24.7151	26.9876	27.5668	1.81913	0.0659897	0.0262555	0.0277636
AHI#1.77_316.9958n	37.2631	33.7969	35.53	723.261	700.455	711.858	53.1906	61.6861	57.4383	20.0354	1.61662	0.0806879	0.00029071	0.000345575
AHI#1.77_391.0701n	94.2015	54.4112	74.3064	2444.47	3044.77	2744.62	251.141	299.737	275.439	36.9366	3.7068	0.100356	0.0124534	0.0145496
AHI#1.77_430.0330m/z	8.05912	12.5322	10.2957	231.408	127.777	179.592	4.2194	8.92999	6.5747	17.4435	0.638588	0.036609	0.0824129	0.0793263
AHI#1.84_372.0119m/z	8.75556	18.805	13.7803	202.714	177.454	190.084	25.6517	2.69617	14.1739	13.7939	1.02856	0.0745666	0.00589194	0.00928158
AHI#1.91_420.0616m/z	79.5417	0.439978	39.9908	1275.96	1174.17	1225.06	87.9196	76.9031	82.4113	30.6336	2.06076	0.067271	0.00294538	0.00200133
AHI#1.91_446.0113m/z	16.9866	8.78999	12.8883	270.953	141.61	206.282	13.6148	8.59919	11.107	16.0053	0.861787	0.0538438	0.0963273	0.0946134
AHI#1.93_397.0946m/z	154.772	119.243	137.008	1811.34	1738.46	1774.9	206.831	221.5	214.165	12.9547	1.56316	0.120663	0.000611995	0.000566666
AHI#1.95_264.0197m/z	3.93747	32.2636	18.1006	613.971	586.19	600.08	39.6857	26.9978	33.3417	33.1526	1.84203	0.0555621	0.00115991	0.000725254
AHI#1.95_354.0511m/z	60.1492	37.0212	48.5852	4449.22	4473.32	4461.27	87.468	100.995	94.2315	91.8236	1.93951	0.0211221	1.43251e-05	1.0013e-05
AHI#1.95_466.0651m/z	17.3157	47.9166	32.6161	643.537	651.108	647.323	54.7835	47.6629	51.2232	19.8467	1.57049	0.0791309	0.000656816	7.59888e-05
AHI#1.98_199.9766m/z	14.747	10.4799	12.6134	188.112	174.525	181.318	21.0052	10.4934	15.7493	14.375	1.24861	0.08686	0.00177666	0.00268036
AHI#1.98_328.0357m/z	17.5347	0.809005	9.17183	407.184	534.855	471.019	12.7262	13.7798	13.253	51.355	1.44497	0.0281369	0.0188834	0.0188982
AHI#11.06_678.8959m/z	9.82102	13.8399	11.8305	314.979	315.254	315.116	22.7522	23.8134	23.2828	26.636	1.96804	0.0738863	4.41007e-05	3.52696e-06
AHI#12.32_331.5543n	90.1697	104.114	97.1419	1064.67	1214.84	1139.75	131.914	94.2665	113.09	11.7329	1.16417	0.0992233	0.00519006	0.00563655
AHI#2.00_243.9879m/z	13.6232	2.34797	7.98556	412.47	439.262	425.866	3.6697	18.5752	11.1225	53.3296	1.39282	0.0261173	0.00120747	0.00136337
AHI#2.00_339.0283n	275.664	270.145	272.904	5462.94	5110.31	5286.62	479.272	555.646	517.459	19.3717	1.89612	0.0978808	0.00123474	0.00142786
AHI#2.00_430.0681m/z	55.2285	90.0809	72.6547	822.595	817.055	819.825	112.014	63.6783	87.8462	11.2839	1.20909	0.107152	0.000557233	0.00110263
AHI#2.01_283.9382m/z	54.7901	49.3	52.0451	1902.2	2066.73	1984.46	58.6713	51.8043	55.2378	38.1297	1.06135	0.0278351	0.00180939	0.00181651
AHI#2.03_368.0548n	67.1953	97.2141	82.2047	1251.17	1365.99	1308.58	82.9465	105.638	94.2922	15.9185	1.14704	0.072057	0.00233284	0.00231433
AHI#2.03_458.0864n	67.196	43.8341	55.515	1695.56	1883.05	1789.3	166.046	193.942	179.994	32.2309	3.24226	0.100595	0.00295574	0.00345043
AHI#2.08_191.9717m/z	62.3064	63.1156	62.711	1081.77	1145.09	1113.43	83.8596	74.5768	79.2182	17.7549	1.26323	0.0711482	0.000906889	0.00095596
AHI#2.08_218.9887m/z	125.341	106.689	116.015	3187.98	3273.8	3230.89	204.482	219.526	212.004	27.8489	1.82739	0.0656178	0.000198665	0.000208164
AHI#2.10_173.9612m/z	37.751	26.2794	32.0152	3080.1	3272.26	3176.18	91.5454	69.7007	80.623	99.2086	2.51828	0.0253836	0.000935783	0.000974349
AHI#2.10_244.9751n	534.826	478.706	506.766	64080	66846.9	65463.5	756.654	667.877	712.266	129.179	1.40551	0.0108803	0.00045349	0.000456652
AHI#2.12_197.9590m/z	7.24709	5.42373	6.33541	174.234	229.583	201.908	3.00905	5.65893	4.33399	31.8698	0.68409	0.0214651	0.0194618	0.019103
AHI#2.15_289.9463m/z	92.3305	103.19	97.7603	2468.65	2456.1	2462.38	114.966	98.838	106.902	25.1879	1.09351	0.0434141	1.23191e-05	1.88212e-05
AHI#2.15_305.9202m/z	34.3489	30.6523	32.5006	1049.95	1052.22	1051.08	31.4115	44.0223	37.7169	32.3405	1.1605	0.0358838	4.53926e-06	3.99729e-05
AHI#2.24_366.0391n	116.062	211.967	164.015	3515.57	4180.41	3847.99	118.361	207.091	162.726	23.4612	0.992142	0.0422886	0.00820951	0.00818006
AHI#2.24_405.0019m/z	32.4973	29.8895	31.1934	348.7	365.613	357.157	19.4507	25.5585	22.5046	11.4498	0.721453	0.0630104	0.000688313	0.000721024
AHI#2.24_457.0780m/z	176.335	237.705	207.02	2974.95	3387.76	3181.35	340.117	302.403	321.26	15.3674	1.55183	0.100982	0.00488602	0.00521048
AHI#2.34_363.0380n	19.1434	34.1449	26.6442	326.965	392.212	359.589	77.5503	21.8506	49.7004	13.496	1.86534	0.138215	0.00995777	0.0186259
AHI#2.65_173.0419m/z	556.388	521.045	538.716	10687.9	10746.2	10717	135.321	227.333	181.327	19.8937	0.336591	0.0169195	1.12367e-05	2.67408e-05
AHI#2.65_189.0156m/z	11.544	17.289	14.4165	187.748	153.878	170.813	18.7466	6.87299	12.8098	11.8485	0.888552	0.074993	0.0118481	0.0126549
AHI#2.91_173.0208m/z	15.0855	19.2651	17.1753	300.61	258.873	279.741	31.3345	10.9501	21.1423	16.2874	1.23097	0.075578	0.00631964	0.00796911
AHI#2.98_124.0392m/z	4401.26	5713.28	5057.27	97158.4	126902	112030	8803.68	10468.4	9636.04	22.1523	1.90539	0.0860129	0.0188205	0.0205123
AHI#3.00_199.0298n	50.8997	22.34	36.6199	412.443	493.102	452.773	64.4477	67.2725	65.8601	12.3641	1.79848	0.14546	0.0104043	0.0107037
AHI#3.02_251.0220m/z	0.00302166	0	0.00151083	106.641	71.1682	88.9045	0	0.000105482	5.2741e-05	58844.9	0.0349087	5.93232e-07	0.0375721	0.0375709
AHI#3.05_381.0370m/z	37.8514	61.064	49.4577	1633.24	2036.12	1834.68	53.1287	69.3116	61.2201	37.0959	1.23783	0.0333683	0.0125348	0.0126773
AHI#3.05_516.0913m/z	324.928	234.139	279.533	4558.25	4618.41	4588.33	413.659	432.461	423.06	16.4143	1.51345	0.0922035	0.00015968	5.72311e-05
AHI#3.07_318.0406m/z	7.4982	22.3838	14.941	201.548	169.455	185.501	12.9879	9.46132	11.2246	12.4156	0.751263	0.0605096	0.0105849	0.00847122
AHI#3.07_369.0467m/z	22.9425	4.85814	13.9003	198.707	114.315	156.511	16.3466	8.19107	12.2688	11.2595	0.882629	0.0783894	0.0806448	0.076585
AHI#3.07_371.0411m/z	196.05	252.925	224.488	2854.95	2963.12	2909.04	83.2008	107.838	95.5195	12.9586	0.4255	0.0328354	0.000517697	0.000388475
AHI#3.07_588.9024m/z	30.6584	29.1505	29.9045	474.188	312.887	393.538	40.987	29.5066	35.2468	13.1598	1.17865	0.0895639	0.0458391	0.0473386
AHI#3.14_136.2968m/z	31.2675	8.54502	19.9063	1755.84	870.258	1313.05	12.9096	0	6.45479	65.9616	0.324259	0.00491588	0.10003	0.0982355
AHI#3.21_192.0031m/z	6.88108	3.79579	5.33843	45.5016	60.7523	53.127	2.99331	3.52798	3.26065	9.95179	0.610787	0.0613746	0.0254937	0.0226206
AHI#3.24_291.9285m/z	1.69834	5.31297	3.50565	44.2574	53.6254	48.9414	4.46696	5.71172	5.08934	13.9607	1.45175	0.103988	0.0119909	0.0114124
AHI#3.29_274.0049m/z	8.10781	5.09263	6.60022	95.9864	121.458	108.722	11.0995	11.921	11.5103	16.4725	1.74392	0.105869	0.015407	0.0167507
AHI#8.22_321.9488m/z	1.16464	4.23162	2.69813	67.8913	69.924	68.9076	11.8636	7.64691	9.75527	25.539	3.61556	0.14157	0.000771201	0.00156198
Feature	FM	FM'	AVGFM	LmCM	LmCM'	AVGLmCM	EcCM	EcCM'	AVGEcCM	AVGLmCM/AVGFM	AVGEcCM/AVGFM	AVGEcCM/AVGLmCM	t-test (FM vs LmCM)	t-test (LmCM vs EcCM)
RPP#1.19_136.0617m/z	5568.18	5496.76	5532.47	66421.5	67060.2	66740.9	1311.33	1266.77	1289.05	12.0635	0.232998	0.0193143	2.75644e-05	2.39244e-05
RPP#1.24_315.0515m/z	155.58	217.099	186.34	2005.91	2248.31	2127.11	224.341	215.35	219.846	11.4152	1.17981	0.103354	0.00412553	0.00401943
RPP#1.26_146.0322n	673.128	597.253	635.19	16663.2	16694.6	16678.9	901.547	803.698	852.622	26.2581	1.34231	0.0511198	6.54603e-06	1.05371e-05
RPP#1.26_510.0732n	128.011	139.382	133.696	1262.65	1702.04	1482.35	242.667	158.713	200.69	11.0874	1.50109	0.135387	0.0255414	0.0291317
RPP#5.58_195.5300m/z	0.75835	9.29899	5.02867	52.7116	48.1861	50.4488	3.76459	8.86195	6.31327	10.0322	1.25546	0.125142	0.0111326	0.00591031
Feature	FM	FM'	AVGFM	LmCM	LmCM'	AVGLmCM	EcCM	EcCM'	AVGEcCM	AVGLmCM/AVGFM	AVGEcCM/AVGFM	AVGEcCM/AVGLmCM	t-test (FM vs LmCM)	t-test (LmCM vs EcCM)
ZHI#0.91_229.0889m/z	29.6373	17.3807	23.509	676.153	651.812	663.982	35.0328	48.0481	41.5405	28.2437	1.767	0.0625626	0.000452345	0.000491268
ZHI#0.93_215.0729m/z	43.882	39.7974	41.8397	1178.44	1271.9	1225.17	62.5941	56.3933	59.4937	29.2824	1.42194	0.0485597	0.00155876	0.0016102
ZHI#1.14_206.0596n	1129.97	1279.67	1204.82	57066	66018.1	61542.1	2425.78	2500.29	2463.04	51.0799	2.04432	0.040022	0.00545967	0.00569151
ZHI#1.19_264.0304n	114.998	124.918	119.958	1307.59	1405.04	1356.31	154.792	122.951	138.871	11.3065	1.15767	0.102389	0.00156555	0.00176808
ZHI#1.27_326.9669m/z	14.4066	15.4136	14.9101	607.713	720.803	664.258	2.61484	4.04442	3.32963	44.5508	0.223313	0.00501255	0.00749838	0.00724131
ZHI#1.55_154.0143m/z	2209.53	2188.85	2199.19	26401.9	27049.8	26725.8	1629.62	1736.15	1682.88	12.1526	0.765229	0.0629684	0.000174617	0.000171845
ZHI#1.55_331.0184m/z	3.51252	0	1.75626	596.533	547.82	572.177	10.9278	0	5.46391	325.793	3.11111	0.00954934	0.00182771	0.00193451
ZHI#10.02_655.1496m/z	26.3795	44.1104	35.245	1986.65	1951.09	1968.87	50.7437	29.5914	40.1675	55.8624	1.13967	0.0204013	0.000105547	0.000115025
ZHI#3.86_249.0169m/z	16.0353	25.618	20.8267	1845.92	1712.8	1779.36	45.1657	9.01e-05	22.5829	85.4367	1.08433	0.0126916	0.00143686	0.00159682
ZHI#3.91_117.0341m/z	77.1737	82.6664	79.92	1180.47	1204.1	1192.29	104.889	49.6602	77.2746	14.9185	0.966899	0.064812	0.00011886	0.000724817
ZHI#5.42_134.1074m/z	0	0	0	1163.45	1160.64	1162.05	2.42313	2.58656	2.50484	#DIV/0!	#DIV/0!	0.00215554	1.45937e-06	1.47064e-06
ZHI#5.42_134.1630m/z	187.153	193.36	190.256	2026.74	2224.43	2125.58	5.42305	0	2.71153	11.1722	0.014252	0.00127566	0.00260106	0.0021627
ZHI#5.42_134.3088m/z	72.7695	0	36.3848	6083.99	6296.91	6190.45	1.29209	3.23715	2.26462	170.138	0.0622408	0.000365824	0.000334047	0.000295861
ZHI#6.50_140.1077m/z	67.333	67.2709	67.3019	790.51	795.911	793.211	36.0348	34.4192	35.227	11.7859	0.523417	0.0444106	1.38423e-05	1.38297e-05
ZHI#6.55_327.0604m/z	9.99521	20.0688	15.032	206.804	191.211	199.008	19.9915	15.8014	17.8964	13.2389	1.19055	0.0899285	0.0025359	0.00198121
ZHI#6.58_319.0106m/z	7.90578	7.46361	7.68469	120.61	113.22	116.915	5.13676	10.2679	7.70235	15.214	1.0023	0.06588	0.00114658	0.00169239
ZHI#6.58_423.1014m/z	17.3864	16.1933	16.7898	384.758	409.748	397.253	50.1	54.5903	52.3451	23.6603	3.11767	0.131768	0.00107925	0.00135199
ZHI#6.58_546.0560m/z	0	0	0	116.969	145.518	131.244	9.00298	0	4.50149	#DIV/0!	#DIV/0!	0.0342987	0.0116236	0.013661
ZHI#6.58_568.0471m/z	35.5404	31.1548	33.3476	442.952	408.682	425.817	38.0911	38.7249	38.408	12.769	1.15175	0.0901984	0.00193179	0.00195126
ZHI#6.58_629.1093n	21.6547	52.2626	36.9586	435.301	477.19	456.245	26.4932	13.9919	20.2426	12.3448	0.547709	0.0443678	0.00380566	0.00250368
ZHI#6.60_187.0416m/z	1066.96	1125.13	1096.04	26918.1	27588.8	27253.4	1341.06	1254.75	1297.91	24.8653	1.18418	0.0476236	0.000165578	0.000169671
ZHI#6.60_218.9820m/z	250.585	235.267	242.926	2869.28	2812.62	2840.95	362.181	347.255	354.718	11.6947	1.46019	0.124859	0.000127595	0.000138846
ZHI#6.60_221.0122m/z	707.054	734.521	720.787	40177.2	40285.5	40231.3	1046.4	949.841	998.12	55.8158	1.38476	0.0248095	1.99892e-06	3.41902e-06
ZHI#6.60_353.0443m/z	9.68698	10.4144	10.0507	184.51	133.866	159.188	20.8473	23.112	21.9796	15.8385	2.18687	0.138074	0.0276441	0.0324738
ZHI#6.60_425.0655m/z	37.4957	48.4545	42.9751	5791.76	5902.07	5846.92	38.181	95.7008	66.9409	136.054	1.55767	0.0114489	9.11823e-05	0.000115792
ZHI#6.60_441.0398m/z	95.514	105.709	100.612	3033.85	3123.64	3078.75	104.835	107.662	106.249	30.6004	1.05603	0.0345103	0.000230101	0.000228261
ZHI#6.60_537.0794m/z	31.9906	23.0681	27.5294	1602.74	1590.12	1596.43	56.5654	29.6309	43.0981	57.9901	1.56553	0.0269966	2.4275e-05	9.16711e-05
ZHI#6.60_547.0383m/z	3.22688	1.6925	2.45969	89.2803	109.779	99.5295	0	0	0	40.4643	0	0	0.0110259	0.0104385
ZHI#6.60_553.0543m/z	21.4381	21.878	21.658	1162.63	1294.24	1228.43	22.713	5.16528	13.9391	56.7195	0.6436	0.0113471	0.00296002	0.00297438
ZHI#6.60_569.0282m/z	20.6814	0.175102	10.4282	376.769	455.797	416.283	11.5622	41.6578	26.61	39.9188	2.55172	0.0639229	0.00996613	0.0115698
ZHI#6.63_158.0060n	79.0554	89.0138	84.0346	3578.18	3394.8	3486.49	153.719	149.726	151.722	41.4888	1.80547	0.0435171	0.000727546	0.00075548
ZHI#6.63_202.0453n	4636.67	5327.82	4982.25	120256	121109	120683	7221.4	7273.44	7247.42	24.2225	1.45465	0.0600535	2.24871e-05	1.41663e-05
ZHI#6.63_218.0190n	303.657	376.478	340.067	13498.6	13646.9	13572.7	460.288	496.349	478.319	39.9119	1.40654	0.0352411	3.89538e-05	3.39455e-05
ZHI#6.63_307.0348m/z	41.5224	43.0496	42.286	14620.4	14850.8	14735.6	94.7511	44.1993	69.4752	348.475	1.64298	0.00471479	6.14482e-05	6.46432e-05
ZHI#6.63_315.0274m/z	5.19935	5.31326	5.2563	244.303	295.89	270.096	0.00470426	6.89192	3.44831	51.3852	0.656033	0.012767	0.00935247	0.00938994
ZHI#6.63_419.0485m/z	0.0044379	1.70523	0.854834	2592.78	2569.98	2581.38	0	0	0	3019.74	0	0	1.96117e-05	1.94902e-05
ZHI#6.63_420.0515m/z	15.9578	11.2112	13.5845	487.958	539.138	513.548	9.89574	12.92	11.4079	37.804	0.839772	0.0222139	0.00263185	0.002596
ZHI#6.63_447.0486m/z	3.08799	0	1.544	34.7765	41.5989	38.1877	0	0	0	24.733	0	0	0.0102804	0.0078849
ZHI#6.63_572.1246m/z	48.6322	51.1856	49.9089	662.782	588.061	625.422	51.344	58.0689	54.7064	12.5313	1.09612	0.0874713	0.00419257	0.00429223
ZHI#6.63_594.1163m/z	18.5279	19.7144	19.1212	494.529	518.058	506.293	0	0	0	26.4782	0	0	0.000584134	0.000539509
ZHI#6.66_482.1031m/z	106.051	74.0457	90.0482	975.598	960.552	968.075	111.067	105.984	108.526	10.7506	1.2052	0.112105	0.000405334	8.53323e-05
ZHI#6.66_578.1423m/z	28.4863	24.0068	26.2466	1012.23	1005.93	1009.08	19.4141	39.5368	29.4755	38.4462	1.12302	0.0292102	1.54595e-05	0.000115804
ZHI#6.66_613.1892m/z	7.60208	0.195028	3.89856	301.058	228.083	264.57	22.6185	36.2491	29.4338	67.8637	7.54992	0.111251	0.019226	0.0240254
ZHI#6.68_381.0391m/z	28.946	61.0893	45.0177	532.157	561.678	546.918	53.8464	78.2084	66.0274	12.149	1.4667	0.120726	0.00188493	0.00157998
ZHI#6.68_397.0136m/z	12.476	2.98238	7.72917	95.8412	118.16	107.001	3.62281	7.3804	5.50161	13.8438	0.711798	0.0514165	0.0145975	0.012204
ZHI#6.68_438.0759m/z	1.1e-07	1e-07	1.05e-07	40.5009	19.7188	30.1099	1.1e-07	1e-07	1.05e-07	2.86761e+08	1	3.48723e-09	0.101318	0.101318
ZHI#6.68_619.2072m/z	48.0998	53.0065	50.5531	614.136	630.904	622.52	4.51533	50.096	27.3057	12.3142	0.540138	0.0438631	0.000233178	0.00166033
ZHI#6.68_662.1030m/z	0	1.37925	0.689623	94.408	101.032	97.7197	2.88901	14.0463	8.46768	141.7	12.2787	0.0866527	0.00121325	0.00524215
ZHI#6.71_241.0302m/z	8.60867	5.15927	6.88397	105.619	100.753	103.186	14.4105	4.70346	9.55698	14.9893	1.38829	0.092619	0.000957878	0.00334578
ZHI#6.71_610.0895m/z	1.19153	0	0.595767	191.163	151.828	171.496	0	0	0	287.857	0	0	0.0129978	0.0128978
ZHI#6.71_684.1373m/z	0	2.95947	1.47973	179.705	200.69	190.197	4.15845	0	2.07923	128.535	1.40514	0.0109319	0.00313784	0.00321749
ZHI#6.71_690.1544m/z	0	6.39072	3.19536	156.478	155.651	156.064	6.22475	0	3.11237	48.841	0.97403	0.0199429	0.000443943	0.000421116
ZHI#6.73_337.0128m/z	0	0	0	212.62	175.796	194.208	0	1.46915	0.734576	#DIV/0!	#DIV/0!	0.00378242	0.00886845	0.00894905
ZHI#6.73_369.0182m/z	4.48824	5.02191	4.75507	207.841	188.22	198.031	2.74016	4.52074	3.63045	41.6462	0.763489	0.0183327	0.00256855	0.00255797
ZHI#6.76_330.9968m/z	0	0	0	101.636	115.092	108.364	0	3.18859	1.5943	#DIV/0!	#DIV/0!	0.0147124	0.00383277	0.00416767
ZHI#6.78_699.5052m/z	6.76425	2.99017	4.87721	59.9354	54.0812	57.0083	4.19585	0	2.09793	11.6887	0.430149	0.0368004	0.0044333	0.00427377
ZHI#6.81_454.1132m/z	12.902	12.6231	12.7625	366.688	446.301	406.494	0	10.2831	5.14155	31.8506	0.402863	0.0126485	0.0100673	0.00985336
ZHI#6.84_286.9689m/z	1.56353	0.53563	1.04958	155.04	174.482	164.761	0	5.64888	2.82444	156.977	2.69102	0.0171427	0.00351713	0.00388509
ZHI#6.84_420.2975m/z	3.61408	3.67544	3.64476	74.1192	89.3	81.7096	10.0461	3.65721	6.85167	22.4184	1.87987	0.0838539	0.00932223	0.0118871
ZHI#7.22_310.1144m/z	127.366	93.6031	110.484	1779.11	1781.56	1780.33	91.1575	109.967	100.562	16.1139	0.910192	0.056485	0.000102725	3.18775e-05
ZHI#8.89_565.0478m/z	7.65655	15.0021	11.3293	1611.17	1797.34	1704.25	136.229	101.238	118.734	150.428	10.4802	0.0696691	0.00301442	0.00354966
ZHI#8.89_603.0039m/z	0.527072	5.3227	2.92488	312.712	268.562	290.637	2.79132	50.9231	26.8572	99.367	9.18231	0.0924081	0.00590381	0.0149839
ZHI#9.48_258.0383m/z	0	0.012438	0.00621901	160.399	209.58	184.99	0	0.0603197	0.0301599	29745.9	4.84963	0.000163035	0.0172161	0.0172204

## Sheet: Compounds identified
Feature	Retention time	m/z	Compound ID	Description	Adducts	Formula	Score	Mass Error (ppm)	Isotope Similarity	Charge	Retention time (min)	Max Fold Change (LmCM>FM or EcCM)
ZHI#8.89_565.0478m/z	8.89	565.048	439156	URIDINE DIPHOSPHATE GLUCOSE (UDP-D-Glucose)	M-H	C15H24N2O17P2	40.7	0.0451127	97.8397	1	8.88775	151.588
ZHI#9.48_258.0383m/z	9.48	258.038	439217	D-GLUCOSAMINE 6-PHOSPHATE	M-H	C6H14NO8P	39.3	-0.581264	91.4741	1	9.47798	27778.7
